# Supplementary material for: Simulation Study on Coverage Path Planning of Autonomous Tasks in Hilly Farmland Based on Energy Consumption Model
Source: Hindawi journal article supplement (doi:10.1155/2020/4535734), 2020-08-30
Supplement: f1 [file 4535734.f1.zip]

Archive with 174 entries (139 files):
- 4535734.f1/Algorithm-pathplanning-matlab/
- 4535734.f1/Algorithm-pathplanning-matlab/+calculation/
- 4535734.f1/Algorithm-pathplanning-matlab/+calculation/energy.m
- 4535734.f1/Algorithm-pathplanning-matlab/+calculation/to_standard_poly.m
- 4535734.f1/Algorithm-pathplanning-matlab/+config/
- 4535734.f1/Algorithm-pathplanning-matlab/+config/@GlobalConfig/
- 4535734.f1/Algorithm-pathplanning-matlab/+config/@GlobalConfig/GlobalConfig.m
- 4535734.f1/Algorithm-pathplanning-matlab/+opitimization/
- 4535734.f1/Algorithm-pathplanning-matlab/+opitimization/single_opitimization.m
- 4535734.f1/Algorithm-pathplanning-matlab/+transform/
- 4535734.f1/Algorithm-pathplanning-matlab/+transform/longlat2meter.m
- 4535734.f1/Algorithm-pathplanning-matlab/+turn/
- 4535734.f1/Algorithm-pathplanning-matlab/+turn/@BulbTurn/
- 4535734.f1/Algorithm-pathplanning-matlab/+turn/@BulbTurn/BulbTurn.m
- 4535734.f1/Algorithm-pathplanning-matlab/+turn/@FishtailTurn/
- 4535734.f1/Algorithm-pathplanning-matlab/+turn/@FishtailTurn/FishtailTurn.m
- 4535734.f1/Algorithm-pathplanning-matlab/+turn/@TurningStrategy/
- 4535734.f1/Algorithm-pathplanning-matlab/+turn/@TurningStrategy/TurningStrategy.m
- 4535734.f1/Algorithm-pathplanning-matlab/2020.04.25/
- 4535734.f1/Algorithm-pathplanning-matlab/2020.04.25/0101/
- 4535734.f1/Algorithm-pathplanning-matlab/2020.04.25/0101/1.csv
- 4535734.f1/Algorithm-pathplanning-matlab/2020.04.25/0101/2.csv
- 4535734.f1/Algorithm-pathplanning-matlab/2020.04.25/0202/
- 4535734.f1/Algorithm-pathplanning-matlab/2020.04.25/0202/1.csv
- 4535734.f1/Algorithm-pathplanning-matlab/2020.04.25/0202/2.csv
- 4535734.f1/Algorithm-pathplanning-matlab/2020.04.25/0303/
- 4535734.f1/Algorithm-pathplanning-matlab/2020.04.25/0303/1.csv
- 4535734.f1/Algorithm-pathplanning-matlab/2020.04.25/0303/2.csv
- 4535734.f1/Algorithm-pathplanning-matlab/2020.04.25/0404/
- 4535734.f1/Algorithm-pathplanning-matlab/2020.04.25/0404/1.csv
- 4535734.f1/Algorithm-pathplanning-matlab/2020.04.25/0404/2.csv
- 4535734.f1/Algorithm-pathplanning-matlab/2020.04.25/0505/
- 4535734.f1/Algorithm-pathplanning-matlab/2020.04.25/0505/1.csv
- 4535734.f1/Algorithm-pathplanning-matlab/2020.04.25/0505/2.csv
- 4535734.f1/Algorithm-pathplanning-matlab/2020.04.25/0606/
- 4535734.f1/Algorithm-pathplanning-matlab/2020.04.25/0606/1.csv
- 4535734.f1/Algorithm-pathplanning-matlab/2020.04.25/0606/2.csv
- 4535734.f1/Algorithm-pathplanning-matlab/2020.04.25/0707/
- 4535734.f1/Algorithm-pathplanning-matlab/2020.04.25/0707/1.csv
- 4535734.f1/Algorithm-pathplanning-matlab/2020.04.25/0707/2.csv
- 4535734.f1/Algorithm-pathplanning-matlab/2020.04.25/0808/
- 4535734.f1/Algorithm-pathplanning-matlab/2020.04.25/0808/1.csv
- 4535734.f1/Algorithm-pathplanning-matlab/2020.04.25/0808/2.csv
- 4535734.f1/Algorithm-pathplanning-matlab/2020.04.25/0909/
- 4535734.f1/Algorithm-pathplanning-matlab/2020.04.25/0909/1.csv
- 4535734.f1/Algorithm-pathplanning-matlab/2020.04.25/0909/2.csv
- 4535734.f1/Algorithm-pathplanning-matlab/Arc.m
- 4535734.f1/Algorithm-pathplanning-matlab/arrow.m
- 4535734.f1/Algorithm-pathplanning-matlab/between_farm/
- 4535734.f1/Algorithm-pathplanning-matlab/between_farm/edge2pathes.m
- 4535734.f1/Algorithm-pathplanning-matlab/corrosion.m
- 4535734.f1/Algorithm-pathplanning-matlab/cross_debug.m
- 4535734.f1/Algorithm-pathplanning-matlab/crossp.m
- 4535734.f1/Algorithm-pathplanning-matlab/Curve.m
- 4535734.f1/Algorithm-pathplanning-matlab/demo_corrosion.m
- 4535734.f1/Algorithm-pathplanning-matlab/demo_plotline.m
- 4535734.f1/Algorithm-pathplanning-matlab/dfs.m
- 4535734.f1/Algorithm-pathplanning-matlab/evaluate.m
- 4535734.f1/Algorithm-pathplanning-matlab/farm_beteew_debug.m
- 4535734.f1/Algorithm-pathplanning-matlab/findStartPoint.m
- 4535734.f1/Algorithm-pathplanning-matlab/functional/
- 4535734.f1/Algorithm-pathplanning-matlab/functional/apply.m
- 4535734.f1/Algorithm-pathplanning-matlab/functional/applycomb.m
- 4535734.f1/Algorithm-pathplanning-matlab/functional/applymany.m
- 4535734.f1/Algorithm-pathplanning-matlab/functional/comp.m
- 4535734.f1/Algorithm-pathplanning-matlab/functional/curry.m
- 4535734.f1/Algorithm-pathplanning-matlab/functional/fcond.m
- 4535734.f1/Algorithm-pathplanning-matlab/functional/flip.m
- 4535734.f1/Algorithm-pathplanning-matlab/functional/foldl.m
- 4535734.f1/Algorithm-pathplanning-matlab/functional/foldr.m
- 4535734.f1/Algorithm-pathplanning-matlab/functional/ftest.m
- 4535734.f1/Algorithm-pathplanning-matlab/functional/grep.m
- 4535734.f1/Algorithm-pathplanning-matlab/functional/id.m
- 4535734.f1/Algorithm-pathplanning-matlab/functional/indexAt.m
- 4535734.f1/Algorithm-pathplanning-matlab/functional/indexBy.m
- 4535734.f1/Algorithm-pathplanning-matlab/functional/indexer.m
- 4535734.f1/Algorithm-pathplanning-matlab/functional/indexInto.m
- 4535734.f1/Algorithm-pathplanning-matlab/functional/isall.m
- 4535734.f1/Algorithm-pathplanning-matlab/functional/isany.m
- 4535734.f1/Algorithm-pathplanning-matlab/functional/islambda.m
- 4535734.f1/Algorithm-pathplanning-matlab/functional/isTrue.m
- 4535734.f1/Algorithm-pathplanning-matlab/functional/konst.m
- 4535734.f1/Algorithm-pathplanning-matlab/functional/map.m
- 4535734.f1/Algorithm-pathplanning-matlab/functional/mapcomb.m
- 4535734.f1/Algorithm-pathplanning-matlab/functional/mapmany.m
- 4535734.f1/Algorithm-pathplanning-matlab/functional/mapn.m
- 4535734.f1/Algorithm-pathplanning-matlab/functional/memberof.m
- 4535734.f1/Algorithm-pathplanning-matlab/functional/negate.m
- 4535734.f1/Algorithm-pathplanning-matlab/functional/reject.m
- 4535734.f1/Algorithm-pathplanning-matlab/functional/scurry.m
- 4535734.f1/Algorithm-pathplanning-matlab/functional/select.m
- 4535734.f1/Algorithm-pathplanning-matlab/functional/zipUp.m
- 4535734.f1/Algorithm-pathplanning-matlab/functional_utils/
- 4535734.f1/Algorithm-pathplanning-matlab/functional_utils/map.m
- 4535734.f1/Algorithm-pathplanning-matlab/getABC.m
- 4535734.f1/Algorithm-pathplanning-matlab/getCoordinate.m
- 4535734.f1/Algorithm-pathplanning-matlab/getFoot.m
- 4535734.f1/Algorithm-pathplanning-matlab/getPoly.m
- 4535734.f1/Algorithm-pathplanning-matlab/getTuring.m
- 4535734.f1/Algorithm-pathplanning-matlab/Graph.m
- 4535734.f1/Algorithm-pathplanning-matlab/gregor_debug.m
- 4535734.f1/Algorithm-pathplanning-matlab/importEdge.m
- 4535734.f1/Algorithm-pathplanning-matlab/importfile.m
- 4535734.f1/Algorithm-pathplanning-matlab/importMap.m
- 4535734.f1/Algorithm-pathplanning-matlab/inPoly.m
- 4535734.f1/Algorithm-pathplanning-matlab/isCross.m
- 4535734.f1/Algorithm-pathplanning-matlab/jiaodian.m
- 4535734.f1/Algorithm-pathplanning-matlab/jiaodianSegmentArc.m
- 4535734.f1/Algorithm-pathplanning-matlab/license.txt
- 4535734.f1/Algorithm-pathplanning-matlab/Line2D.m
- 4535734.f1/Algorithm-pathplanning-matlab/main.m
- 4535734.f1/Algorithm-pathplanning-matlab/main_func.m
- 4535734.f1/Algorithm-pathplanning-matlab/main_plot.m
- 4535734.f1/Algorithm-pathplanning-matlab/multi_find_min.m
- 4535734.f1/Algorithm-pathplanning-matlab/MutiLine2D.m
- 4535734.f1/Algorithm-pathplanning-matlab/onsegment.m
- 4535734.f1/Algorithm-pathplanning-matlab/Path.m
- 4535734.f1/Algorithm-pathplanning-matlab/plotMap.m
- 4535734.f1/Algorithm-pathplanning-matlab/plotPath.m
- 4535734.f1/Algorithm-pathplanning-matlab/Polygon.m
- 4535734.f1/Algorithm-pathplanning-matlab/simplifyPath.m
- 4535734.f1/Algorithm-pathplanning-matlab/single_find_min.m
- 4535734.f1/Algorithm-pathplanning-matlab/solvePath.m
- 4535734.f1/Algorithm-pathplanning-matlab/tk1(1).xyz
- 4535734.f1/Algorithm-pathplanning-matlab/tk6(1).xyz
- 4535734.f1/Algorithm-pathplanning-matlab/tsp/
- 4535734.f1/Algorithm-pathplanning-matlab/tsp/calculateDistance.m
- 4535734.f1/Algorithm-pathplanning-matlab/tsp/crossover.m
- 4535734.f1/Algorithm-pathplanning-matlab/tsp/Farm.m
- 4535734.f1/Algorithm-pathplanning-matlab/tsp/farm_distance_matrix.m
- 4535734.f1/Algorithm-pathplanning-matlab/tsp/fitness.m
- 4535734.f1/Algorithm-pathplanning-matlab/tsp/gatsp.m
- 4535734.f1/Algorithm-pathplanning-matlab/tsp/main_tsp.m
- 4535734.f1/Algorithm-pathplanning-matlab/tsp/mutate.m
- 4535734.f1/Algorithm-pathplanning-matlab/tsp/paint.m
- 4535734.f1/Algorithm-pathplanning-matlab/tsp/readFile.m
- 4535734.f1/Algorithm-pathplanning-matlab/tsp/readme.txt
- 4535734.f1/Algorithm-pathplanning-matlab/tsp/tsp.m
- 4535734.f1/Algorithm-pathplanning-matlab/turn/
- 4535734.f1/Algorithm-pathplanning-matlab/turn/BulbTurn.m
- 4535734.f1/Algorithm-pathplanning-matlab/turn/FishtailTurn.m
- 4535734.f1/Algorithm-pathplanning-matlab/turn/FlatTurn.m
- 4535734.f1/Algorithm-pathplanning-matlab/turn/HookTurning.m
- 4535734.f1/Algorithm-pathplanning-matlab/turn/SimpleTurn.m
- 4535734.f1/Algorithm-pathplanning-matlab/turn/TurningStrategy.m
- 4535734.f1/Algorithm-pathplanning-matlab/turn/UTuring.m
- 4535734.f1/Data from experimental farmland/
- 4535734.f1/Data from experimental farmland/0101/
- 4535734.f1/Data from experimental farmland/0101/1.csv
- 4535734.f1/Data from experimental farmland/0101/2.csv
- 4535734.f1/Data from experimental farmland/0202/
- 4535734.f1/Data from experimental farmland/0202/1.csv
- 4535734.f1/Data from experimental farmland/0202/2.csv
- 4535734.f1/Data from experimental farmland/0303/
- 4535734.f1/Data from experimental farmland/0303/1.csv
- 4535734.f1/Data from experimental farmland/0303/2.csv
- 4535734.f1/Data from experimental farmland/0404/
- 4535734.f1/Data from experimental farmland/0404/1.csv
- 4535734.f1/Data from experimental farmland/0404/2.csv
- 4535734.f1/Data from experimental farmland/0505/
- 4535734.f1/Data from experimental farmland/0505/1.csv
- 4535734.f1/Data from experimental farmland/0505/2.csv
- 4535734.f1/Data from experimental farmland/0606/
- 4535734.f1/Data from experimental farmland/0606/1.csv
- 4535734.f1/Data from experimental farmland/0606/2.csv
- 4535734.f1/Data from experimental farmland/0707/
- 4535734.f1/Data from experimental farmland/0707/1.csv
- 4535734.f1/Data from experimental farmland/0707/2.csv
- 4535734.f1/Data from experimental farmland/0808/
- 4535734.f1/Data from experimental farmland/0808/1.csv
- 4535734.f1/Data from experimental farmland/0808/2.csv
- 4535734.f1/Data from experimental farmland/0909/
- 4535734.f1/Data from experimental farmland/0909/1.csv
- 4535734.f1/Data from experimental farmland/0909/2.csv
