# Supplementary material for: Simulation Study on Coverage Path Planning of Autonomous Tasks in Hilly Farmland Based on Energy Consumption Model
Source: Hindawi journal article supplement (doi:10.1155/2020/4535734), 2020-08-30
Supplement: f1 [file 4535734.f1.zip › 4535734.f1/Algorithm-pathplanning-matlab/+config/@GlobalConfig/GlobalConfig.m]

classdef GlobalConfig
    %GLOBALCONFIG ½ö½öÊÇÒ»¸öÈ«¾ÖÅäÖÃ
    %   ...
    
    properties (Constant)
        omega = 1;  % ÐÐ¼ä¾à
        r = 2.4;  % ×ªÍä°ë¾¶
        delta_x = 3;  % µØÍ·¾àÀë
        mg = 1000;  % ³µÁ¾ÖØÁ¦
        miu = 0.1;  % Ä¦²ÁÒòÊý
    end
    methods
        
    end
end
