# Supplementary material for: Simulation Study on Coverage Path Planning of Autonomous Tasks in Hilly Farmland Based on Energy Consumption Model
Source: Hindawi journal article supplement (doi:10.1155/2020/4535734), 2020-08-30
Supplement: f1 [file 4535734.f1.zip › 4535734.f1/Algorithm-pathplanning-matlab/+opitimization/single_opitimization.m]

function [angle, e, entrance, export, history, l] = single_opitimization(height_map, edge_map, step, figure_num)
% ÕÒ³öÒ»¿éÅ©ÌïµÄ×î¼ÑÂ·Ïß½Ç¶È
% height_map ¸ß¶È³¡[x, y, z]
% edge_map ±ß½Çµã[x, y]
% step ½Ç¶È³¢ÊÔ²½Êý
% % % len ×îÓÅ³¤¶È
% entrance Èë¿Úµã
% export ³ö¿Úµã
% angle ×ÜÂ·¾¶×î½Ç¶È
% figure_num Ëù»æÖÆµÄÍ¼±àºÅ, 0Îª²»»æÖÆ

import config.GlobalConfig
import calculation.energy

x = height_map(:, 1);
y = height_map(:, 2);
z = height_map(:, 3);

edge_x = edge_map(:, 1);
edge_y = edge_map(:, 2);


min_energy = 0;
angle = 0;
min_len = 0;

angles = [];
energys = [];
lens = [];

for i = linspace(0, 2 * pi, step)
    try
    clf(figure_num);
    end
    [path, e, len] = energy(height_map, edge_map, i);
    angles = [angles, i];
    energys = [energys, e];
    lens = [lens, len];
    if min_energy == 0 || e < min_energy
        min_energy = e;
        angle = i;
        min_path = path;
        min_len = len;
    end
end

e = min_energy;
l = min_len;

history = [angles; energys; lens];

entrance = find_first(min_path{1}.data);
export = find_last(min_path{length(min_path)}.data);

end

function point = find_first(array_of_points)
point = array_of_points(1, :);
end

function point = find_last(array_of_points)
array_length = length(array_of_points);
point = array_of_points(array_length, :);
end
