# Supplementary material for: Simulation Study on Coverage Path Planning of Autonomous Tasks in Hilly Farmland Based on Energy Consumption Model
Source: Hindawi journal article supplement (doi:10.1155/2020/4535734), 2020-08-30
Supplement: f1 [file 4535734.f1.zip › 4535734.f1/Algorithm-pathplanning-matlab/+transform/longlat2meter.m]

function result = longlat2meter(long_lat, earth_redius, origin)
%LONGLAT2METER ½«Ô­ÓÐ×ø±êÐÅÏ¢¾­Î³¶È×ª»»ÎªÃ×²Î¿¼×ø±ê
%   arg ÐÎÈç[¾­¶È; Î³¶È]µÄ×ø±êÏµÁÐ
%   earth_redius ËùÈÏÎªµÄµØÇò°ë¾¶
%   orgin ²Î¿¼Ô­µã[¾­¶È; Î³¶È]
meters_per_long = earth_redius * cos(origin(2) / 360) / 360 * 2 * pi; % Ð¡·¶Î§ÄÚµ¥Î»¾­¶ÈËù¿çÃ×Êý
meters_per_lat = earth_redius / 360 * 2 * pi;

ref_long_lat = long_lat - origin;
result = ref_long_lat .* [meters_per_long; meters_per_lat];
end
