# Supplementary material for: Simulation Study on Coverage Path Planning of Autonomous Tasks in Hilly Farmland Based on Energy Consumption Model
Source: Hindawi journal article supplement (doi:10.1155/2020/4535734), 2020-08-30
Supplement: f1 [file 4535734.f1.zip › 4535734.f1/Algorithm-pathplanning-matlab/+turn/@TurningStrategy/TurningStrategy.m]

classdef TurningStrategy
    %TurningStrategy ×ªÍä·½Ê½
    %   ´Ë´¦ÏÔÊ¾ÏêÏ¸ËµÃ÷
    
    properties
        theta;  % ½Ç¶È
        omega;  % ÐÐµÀ¿í¶È£¨¹¤×÷·ù¿í£©
        r; % ×ªÍä°ë¾¶
    end
    
    methods
        function obj = TurningStrategy(theta, omega, r)
            obj.theta = theta;
            obj.omega = omega;
            obj.r = r;
        end
    end
    
end
