# Supplementary material for: Simulation Study on Coverage Path Planning of Autonomous Tasks in Hilly Farmland Based on Energy Consumption Model
Source: Hindawi journal article supplement (doi:10.1155/2020/4535734), 2020-08-30
Supplement: f1 [file 4535734.f1.zip › 4535734.f1/Algorithm-pathplanning-matlab/2020.04.25/0101/1.csv]

Longitude	Latitude	Elevation
127.1558150214	42.3235487899	443.3279331034
127.1558276470	42.3235487899	443.2635053144
127.1558402727	42.3235487899	443.1990775254
127.1558528983	42.3235487899	443.1346497363
127.1558655240	42.3235487899	443.0702219474
127.1558781496	42.3235487899	443.0057941584
127.1558907752	42.3235487899	442.9413663694
127.1559034009	42.3235487899	442.8769385803
127.1559160265	42.3235487899	442.8125107914
127.1559286521	42.3235487899	442.7480830024
127.1559412778	42.3235487899	442.6836552133
127.1559539034	42.3235487899	442.6192274243
127.1559665291	42.3235487899	442.5547996353
127.1559791547	42.3235487899	442.4903718464
127.1559917803	42.3235487899	442.4259440573
127.1560044060	42.3235487899	442.3615162683
127.1560170316	42.3235487899	442.2970884793
127.1560296572	42.3235487899	442.2326606903
127.1560422829	42.3235487899	442.1682329013
127.1560549085	42.3235487899	442.1038051123
127.1560675342	42.3235487899	442.0393773233
127.1560801598	42.3235487899	441.9749495343
127.1560927854	42.3235487899	441.9105217453
127.1561054111	42.3235487899	441.8460939562
127.1561180367	42.3235487899	441.7816661673
127.1561306623	42.3235487899	441.7172383783
127.1561432880	42.3235487899	441.6528105893
127.1561559136	42.3235487899	441.5883828002
127.1561685393	42.3235487899	441.5239550113
127.1561811649	42.3235487899	441.4595272223
127.1561937905	42.3235487899	441.3950994332
127.1562064162	42.3235487899	441.3306716442
127.1562190418	42.3235487899	441.2662438552
127.1562316675	42.3235487899	441.2018160663
127.1562442931	42.3235487899	441.1373882772
127.1562569187	42.3235487899	441.0729596952
127.1562695444	42.3235487899	441.0085259240
127.1562821700	42.3235487899	440.9440973337
127.1562947956	42.3235487899	440.8796755269
127.1563074213	42.3235487899	440.8152493322
127.1563200469	42.3235487899	440.7508215432
127.1563326726	42.3235487899	440.6863937542
127.1563452982	42.3235487899	440.6219659652
127.1563579238	42.3235487899	440.5575381762
127.1563705495	42.3235487899	440.4931103872
127.1563831751	42.3235487899	440.4286825982
127.1563958007	42.3235487899	440.3642548092
127.1564084264	42.3235487899	440.2998270201
127.1564210520	42.3235487899	440.2353992312
127.1564336777	42.3235487899	440.1709746504
127.1564463033	42.3235487899	440.1065528436
127.1558150214	42.3235580831	443.1382426697
127.1558276470	42.3235580831	443.0738148808
127.1558402727	42.3235580831	443.0093870917
127.1558528983	42.3235580831	442.9449593027
127.1558655240	42.3235580831	442.8805315137
127.1558781496	42.3235580831	442.8161037247
127.1558907752	42.3235580831	442.7516759357
127.1559034009	42.3235580831	442.6872481467
127.1559160265	42.3235580831	442.6228203577
127.1559286521	42.3235580831	442.5583925687
127.1559412778	42.3235580831	442.4939647797
127.1559539034	42.3235580831	442.4295369906
127.1559665291	42.3235580831	442.3651092017
127.1559791547	42.3235580831	442.3006814127
127.1559917803	42.3235580831	442.2362536237
127.1560044060	42.3235580831	442.1718258346
127.1560170316	42.3235580831	442.1073980457
127.1560296572	42.3235580831	442.0429702567
127.1560422829	42.3235580831	441.9785424676
127.1560549085	42.3235580831	441.9141146786
127.1560675342	42.3235580831	441.8496868896
127.1560801598	42.3235580831	441.7852591007
127.1560927854	42.3235580831	441.7208313116
127.1561054111	42.3235580831	441.6564035226
127.1561180367	42.3235580831	441.5919757336
127.1561306623	42.3235580831	441.5275479446
127.1561432880	42.3235580831	441.4631201556
127.1561559136	42.3235580831	441.3986923666
127.1561685393	42.3235580831	441.3342645776
127.1561811649	42.3235580831	441.2698367886
127.1561937905	42.3235580831	441.2054089996
127.1562064162	42.3235580831	441.1409812105
127.1562190418	42.3235580831	441.0765534216
127.1562316675	42.3235580831	441.0121256326
127.1562442931	42.3235580831	440.9476978436
127.1562569187	42.3235580831	440.8832682308
127.1562695444	42.3235580831	440.8188266827
127.1562821700	42.3235580831	440.7543970505
127.1562947956	42.3235580831	440.6899830206
127.1563074213	42.3235580831	440.6255588985
127.1563200469	42.3235580831	440.5611311095
127.1563326726	42.3235580831	440.4967033206
127.1563452982	42.3235580831	440.4322755315
127.1563579238	42.3235580831	440.3678477425
127.1563705495	42.3235580831	440.3034199535
127.1563831751	42.3235580831	440.2389921646
127.1563958007	42.3235580831	440.1745643755
127.1564084264	42.3235580831	440.1101365865
127.1564210520	42.3235580831	440.0457087975
127.1564336777	42.3235580831	439.9812883875
127.1564463033	42.3235580831	439.9168743575
127.1558150214	42.3235673763	442.9485522362
127.1558276470	42.3235673763	442.8841244472
127.1558402727	42.3235673763	442.8196966582
127.1558528983	42.3235673763	442.7552688692
127.1558655240	42.3235673763	442.6908410802
127.1558781496	42.3235673763	442.6264132912
127.1558907752	42.3235673763	442.5619855022
127.1559034009	42.3235673763	442.4975577131
127.1559160265	42.3235673763	442.4331299242
127.1559286521	42.3235673763	442.3687021352
127.1559412778	42.3235673763	442.3042743462
127.1559539034	42.3235673763	442.2398465571
127.1559665291	42.3235673763	442.1754187682
127.1559791547	42.3235673763	442.1109909792
127.1559917803	42.3235673763	442.0465631901
127.1560044060	42.3235673763	441.9821354011
127.1560170316	42.3235673763	441.9177076121
127.1560296572	42.3235673763	441.8532798232
127.1560422829	42.3235673763	441.7888520341
127.1560549085	42.3235673763	441.7244242451
127.1560675342	42.3235673763	441.6599964561
127.1560801598	42.3235673763	441.5955686671
127.1560927854	42.3235673763	441.5311408781
127.1561054111	42.3235673763	441.4667130891
127.1561180367	42.3235673763	441.4022853001
127.1561306623	42.3235673763	441.3378575111
127.1561432880	42.3235673763	441.2734297221
127.1561559136	42.3235673763	441.2090019330
127.1561685393	42.3235673763	441.1445741441
127.1561811649	42.3235673763	441.0801463551
127.1561937905	42.3235673763	441.0157185661
127.1562064162	42.3235673763	440.9512907770
127.1562190418	42.3235673763	440.8868629881
127.1562316675	42.3235673763	440.8224351991
127.1562442931	42.3235673763	440.7580044316
127.1562569187	42.3235673763	440.6935716319
127.1562695444	42.3235673763	440.6291294660
127.1562821700	42.3235673763	440.5646997510
127.1562947956	42.3235673763	440.5002863389
127.1563074213	42.3235673763	440.4358650071
127.1563200469	42.3235673763	440.3714406760
127.1563326726	42.3235673763	440.3070128871
127.1563452982	42.3235673763	440.2425850980
127.1563579238	42.3235673763	440.1781573090
127.1563705495	42.3235673763	440.1137295200
127.1563831751	42.3235673763	440.0493017310
127.1563958007	42.3235673763	439.9848739420
127.1564084264	42.3235673763	439.9204469971
127.1564210520	42.3235673763	439.8560227876
127.1564336777	42.3235673763	439.7916043688
127.1564463033	42.3235673763	439.7271909567
127.1558150214	42.3235766695	442.7588618025
127.1558276470	42.3235766695	442.6944340136
127.1558402727	42.3235766695	442.6300062245
127.1558528983	42.3235766695	442.5655784355
127.1558655240	42.3235766695	442.5011506465
127.1558781496	42.3235766695	442.4367228576
127.1558907752	42.3235766695	442.3722950685
127.1559034009	42.3235766695	442.3078672795
127.1559160265	42.3235766695	442.2434394905
127.1559286521	42.3235766695	442.1790117015
127.1559412778	42.3235766695	442.1145839125
127.1559539034	42.3235766695	442.0501561235
127.1559665291	42.3235766695	441.9857283345
127.1559791547	42.3235766695	441.9213005455
127.1559917803	42.3235766695	441.8568727565
127.1560044060	42.3235766695	441.7924449674
127.1560170316	42.3235766695	441.7280171785
127.1560296572	42.3235766695	441.6635893895
127.1560422829	42.3235766695	441.5991616005
127.1560549085	42.3235766695	441.5347338114
127.1560675342	42.3235766695	441.4703060225
127.1560801598	42.3235766695	441.4058782335
127.1560927854	42.3235766695	441.3414504444
127.1561054111	42.3235766695	441.2770226554
127.1561180367	42.3235766695	441.2125948664
127.1561306623	42.3235766695	441.1481670775
127.1561432880	42.3235766695	441.0837392884
127.1561559136	42.3235766695	441.0193114994
127.1561685393	42.3235766695	440.9548837104
127.1561811649	42.3235766695	440.8904559215
127.1561937905	42.3235766695	440.8260281324
127.1562064162	42.3235766695	440.7616003434
127.1562190418	42.3235766695	440.6971725544
127.1562316675	42.3235766695	440.6327447654
127.1562442931	42.3235766695	440.5683075270
127.1562569187	42.3235766695	440.5038690121
127.1562695444	42.3235766695	440.4394346230
127.1562821700	42.3235766695	440.3750059498
127.1562947956	42.3235766695	440.3105847609
127.1563074213	42.3235766695	440.2461670606
127.1563200469	42.3235766695	440.1817502424
127.1563326726	42.3235766695	440.1173224534
127.1563452982	42.3235766695	440.0528946644
127.1563579238	42.3235766695	439.9884668753
127.1563705495	42.3235766695	439.9240390863
127.1563831751	42.3235766695	439.8596112974
127.1563958007	42.3235766695	439.7951835083
127.1564084264	42.3235766695	439.7307583974
127.1564210520	42.3235766695	439.6663419648
127.1564336777	42.3235766695	439.6019229814
127.1564463033	42.3235766695	439.5375017925
127.1558150214	42.3235859627	442.5691713689
127.1558276470	42.3235859627	442.5047435799
127.1558402727	42.3235859627	442.4403157909
127.1558528983	42.3235859627	442.3758880018
127.1558655240	42.3235859627	442.3114602129
127.1558781496	42.3235859627	442.2470324239
127.1558907752	42.3235859627	442.1826046349
127.1559034009	42.3235859627	442.1181768458
127.1559160265	42.3235859627	442.0537490569
127.1559286521	42.3235859627	441.9893212679
127.1559412778	42.3235859627	441.9248934788
127.1559539034	42.3235859627	441.8604656898
127.1559665291	42.3235859627	441.7960379008
127.1559791547	42.3235859627	441.7316101119
127.1559917803	42.3235859627	441.6671823228
127.1560044060	42.3235859627	441.6027545338
127.1560170316	42.3235859627	441.5383267448
127.1560296572	42.3235859627	441.4738989558
127.1560422829	42.3235859627	441.4094711668
127.1560549085	42.3235859627	441.3450433778
127.1560675342	42.3235859627	441.2806155888
127.1560801598	42.3235859627	441.2161877998
127.1560927854	42.3235859627	441.1517600108
127.1561054111	42.3235859627	441.0873322217
127.1561180367	42.3235859627	441.0229044328
127.1561306623	42.3235859627	440.9584766438
127.1561432880	42.3235859627	440.8940488548
127.1561559136	42.3235859627	440.8296210657
127.1561685393	42.3235859627	440.7651932768
127.1561811649	42.3235859627	440.7007654878
127.1561937905	42.3235859627	440.6363376987
127.1562064162	42.3235859627	440.5719099097
127.1562190418	42.3235859627	440.5074814952
127.1562316675	42.3235859627	440.4430525295
127.1562442931	42.3235859627	440.3786105808
127.1562569187	42.3235859627	440.3141682361
127.1562695444	42.3235859627	440.2497404471
127.1562821700	42.3235859627	440.1853126582
127.1562947956	42.3235859627	440.1208848691
127.1563074213	42.3235859627	440.0564702509
127.1563200469	42.3235859627	439.9920598087
127.1563326726	42.3235859627	439.9276320197
127.1563452982	42.3235859627	439.8632042307
127.1563579238	42.3235859627	439.7987764417
127.1563705495	42.3235859627	439.7343486527
127.1563831751	42.3235859627	439.6699208637
127.1563958007	42.3235859627	439.6054930747
127.1564084264	42.3235859627	439.5410695203
127.1564210520	42.3235859627	439.4766596878
127.1564336777	42.3235859627	439.4122402253
127.1564463033	42.3235859627	439.3478124362
127.1558150214	42.3235952559	442.3794809354
127.1558276470	42.3235952559	442.3150531464
127.1558402727	42.3235952559	442.2506253574
127.1558528983	42.3235952559	442.1861975683
127.1558655240	42.3235952559	442.1217697794
127.1558781496	42.3235952559	442.0573419904
127.1558907752	42.3235952559	441.9929142013
127.1559034009	42.3235952559	441.9284864123
127.1559160265	42.3235952559	441.8640586233
127.1559286521	42.3235952559	441.7996308344
127.1559412778	42.3235952559	441.7352030453
127.1559539034	42.3235952559	441.6707752563
127.1559665291	42.3235952559	441.6063474673
127.1559791547	42.3235952559	441.5419196783
127.1559917803	42.3235952559	441.4774918893
127.1560044060	42.3235952559	441.4130641003
127.1560170316	42.3235952559	441.3486363113
127.1560296572	42.3235952559	441.2842085223
127.1560422829	42.3235952559	441.2197807333
127.1560549085	42.3235952559	441.1553529442
127.1560675342	42.3235952559	441.0909251553
127.1560801598	42.3235952559	441.0264973663
127.1560927854	42.3235952559	440.9620695773
127.1561054111	42.3235952559	440.8976417882
127.1561180367	42.3235952559	440.8332139993
127.1561306623	42.3235952559	440.7687862103
127.1561432880	42.3235952559	440.7043584213
127.1561559136	42.3235952559	440.6399306322
127.1561685393	42.3235952559	440.5755028432
127.1561811649	42.3235952559	440.5110750543
127.1561937905	42.3235952559	440.4466472652
127.1562064162	42.3235952559	440.3822194762
127.1562190418	42.3235952559	440.3177869274
127.1562316675	42.3235952559	440.2533501849
127.1562442931	42.3235952559	440.1889134012
127.1562569187	42.3235952559	440.1244778026
127.1562695444	42.3235952559	440.0600500136
127.1562821700	42.3235952559	439.9956222247
127.1562947956	42.3235952559	439.9311944356
127.1563074213	42.3235952559	439.8667798174
127.1563200469	42.3235952559	439.8023693752
127.1563326726	42.3235952559	439.7379415862
127.1563452982	42.3235952559	439.6735137972
127.1563579238	42.3235952559	439.6090860081
127.1563705495	42.3235952559	439.5446582192
127.1563831751	42.3235952559	439.4802304302
127.1563958007	42.3235952559	439.4158026412
127.1564084264	42.3235952559	439.3513790867
127.1564210520	42.3235952559	439.2869692542
127.1564336777	42.3235952559	439.2225497918
127.1564463033	42.3235952559	439.1581220027
127.1558150214	42.3236045491	442.1897905017
127.1558276470	42.3236045491	442.1253627127
127.1558402727	42.3236045491	442.0609349237
127.1558528983	42.3236045491	441.9965071347
127.1558655240	42.3236045491	441.9320793457
127.1558781496	42.3236045491	441.8676515567
127.1558907752	42.3236045491	441.8032237677
127.1559034009	42.3236045491	441.7387959786
127.1559160265	42.3236045491	441.6743681897
127.1559286521	42.3236045491	441.6099404007
127.1559412778	42.3236045491	441.5455126117
127.1559539034	42.3236045491	441.4810848226
127.1559665291	42.3236045491	441.4166570337
127.1559791547	42.3236045491	441.3522292447
127.1559917803	42.3236045491	441.2878014556
127.1560044060	42.3236045491	441.2233736666
127.1560170316	42.3236045491	441.1589458776
127.1560296572	42.3236045491	441.0945180887
127.1560422829	42.3236045491	441.0300902996
127.1560549085	42.3236045491	440.9656625106
127.1560675342	42.3236045491	440.9012347216
127.1560801598	42.3236045491	440.8368069326
127.1560927854	42.3236045491	440.7723791436
127.1561054111	42.3236045491	440.7079513546
127.1561180367	42.3236045491	440.6435235656
127.1561306623	42.3236045491	440.5790957766
127.1561432880	42.3236045491	440.5146679876
127.1561559136	42.3236045491	440.4502401985
127.1561685393	42.3236045491	440.3858124096
127.1561811649	42.3236045491	440.3213846206
127.1561937905	42.3236045491	440.2569568316
127.1562064162	42.3236045491	440.1925290425
127.1562190418	42.3236045491	440.1280923595
127.1562316675	42.3236045491	440.0636478401
127.1562442931	42.3236045491	439.9992162215
127.1562569187	42.3236045491	439.9347873689
127.1562695444	42.3236045491	439.8703595800
127.1562821700	42.3236045491	439.8059317910
127.1562947956	42.3236045491	439.7415040020
127.1563074213	42.3236045491	439.6770893837
127.1563200469	42.3236045491	439.6126789415
127.1563326726	42.3236045491	439.5482511526
127.1563452982	42.3236045491	439.4838233635
127.1563579238	42.3236045491	439.4193955745
127.1563705495	42.3236045491	439.3549677855
127.1563831751	42.3236045491	439.2905399965
127.1563958007	42.3236045491	439.2261122075
127.1564084264	42.3236045491	439.1616886531
127.1564210520	42.3236045491	439.0972788206
127.1564336777	42.3236045491	439.0328593581
127.1564463033	42.3236045491	438.9684315691
127.1558150214	42.3236138423	442.0001000680
127.1558276470	42.3236138423	441.9356722791
127.1558402727	42.3236138423	441.8712444900
127.1558528983	42.3236138423	441.8068167010
127.1558655240	42.3236138423	441.7423889120
127.1558781496	42.3236138423	441.6779611231
127.1558907752	42.3236138423	441.6135333340
127.1559034009	42.3236138423	441.5491055450
127.1559160265	42.3236138423	441.4846777560
127.1559286521	42.3236138423	441.4202499670
127.1559412778	42.3236138423	441.3558221780
127.1559539034	42.3236138423	441.2913943890
127.1559665291	42.3236138423	441.2269666000
127.1559791547	42.3236138423	441.1625388110
127.1559917803	42.3236138423	441.0981110220
127.1560044060	42.3236138423	441.0336832329
127.1560170316	42.3236138423	440.9692554440
127.1560296572	42.3236138423	440.9048276550
127.1560422829	42.3236138423	440.8403998660
127.1560549085	42.3236138423	440.7759720769
127.1560675342	42.3236138423	440.7115442880
127.1560801598	42.3236138423	440.6471164990
127.1560927854	42.3236138423	440.5826887099
127.1561054111	42.3236138423	440.5182609209
127.1561180367	42.3236138423	440.4538331319
127.1561306623	42.3236138423	440.3894053430
127.1561432880	42.3236138423	440.3249775539
127.1561559136	42.3236138423	440.2605497649
127.1561685393	42.3236138423	440.1961219759
127.1561811649	42.3236138423	440.1316941870
127.1561937905	42.3236138423	440.0672648837
127.1562064162	42.3236138423	440.0028305439
127.1562190418	42.3236138423	439.9383936232
127.1562316675	42.3236138423	439.8739544286
127.1562442931	42.3236138423	439.8095247243
127.1562569187	42.3236138423	439.7450969353
127.1562695444	42.3236138423	439.6806691463
127.1562821700	42.3236138423	439.6162413573
127.1562947956	42.3236138423	439.5518135683
127.1563074213	42.3236138423	439.4873989501
127.1563200469	42.3236138423	439.4229885079
127.1563326726	42.3236138423	439.3585607189
127.1563452982	42.3236138423	439.2941329299
127.1563579238	42.3236138423	439.2297051408
127.1563705495	42.3236138423	439.1652773518
127.1563831751	42.3236138423	439.1008495629
127.1563958007	42.3236138423	439.0364217738
127.1564084264	42.3236138423	438.9719982194
127.1564210520	42.3236138423	438.9075883869
127.1564336777	42.3236138423	438.8431689244
127.1564463033	42.3236138423	438.7787411354
127.1558150214	42.3236231355	441.8104096345
127.1558276470	42.3236231355	441.7459818456
127.1558402727	42.3236231355	441.6815540565
127.1558528983	42.3236231355	441.6171262675
127.1558655240	42.3236231355	441.5526984785
127.1558781496	42.3236231355	441.4882706895
127.1558907752	42.3236231355	441.4238429005
127.1559034009	42.3236231355	441.3594151115
127.1559160265	42.3236231355	441.2949873225
127.1559286521	42.3236231355	441.2305595335
127.1559412778	42.3236231355	441.1661317445
127.1559539034	42.3236231355	441.1017039554
127.1559665291	42.3236231355	441.0372761665
127.1559791547	42.3236231355	440.9728483775
127.1559917803	42.3236231355	440.9084205885
127.1560044060	42.3236231355	440.8439927994
127.1560170316	42.3236231355	440.7795650105
127.1560296572	42.3236231355	440.7151372215
127.1560422829	42.3236231355	440.6507094324
127.1560549085	42.3236231355	440.5862816434
127.1560675342	42.3236231355	440.5218538544
127.1560801598	42.3236231355	440.4574260655
127.1560927854	42.3236231355	440.3929982764
127.1561054111	42.3236231355	440.3285704874
127.1561180367	42.3236231355	440.2641426984
127.1561306623	42.3236231355	440.1997149095
127.1561432880	42.3236231355	440.1352871204
127.1561559136	42.3236231355	440.0708593314
127.1561685393	42.3236231355	440.0064315424
127.1561811649	42.3236231355	439.9420037534
127.1561937905	42.3236231355	439.8775726526
127.1562064162	42.3236231355	439.8131305360
127.1562190418	42.3236231355	439.7486941070
127.1562316675	42.3236231355	439.6842626892
127.1562442931	42.3236231355	439.6198342908
127.1562569187	42.3236231355	439.5554065018
127.1562695444	42.3236231355	439.4909787128
127.1562821700	42.3236231355	439.4265509238
127.1562947956	42.3236231355	439.3621231348
127.1563074213	42.3236231355	439.2977085166
127.1563200469	42.3236231355	439.2332980743
127.1563326726	42.3236231355	439.1688702854
127.1563452982	42.3236231355	439.1044424963
127.1563579238	42.3236231355	439.0400147073
127.1563705495	42.3236231355	438.9755869183
127.1563831751	42.3236231355	438.9111591294
127.1563958007	42.3236231355	438.8467313403
127.1564084264	42.3236231355	438.7823077859
127.1564210520	42.3236231355	438.7178979534
127.1564336777	42.3236231355	438.6534784909
127.1564463033	42.3236231355	438.5890507019
127.1558150214	42.3236324288	441.6207192009
127.1558276470	42.3236324288	441.5562914119
127.1558402727	42.3236324288	441.4918636229
127.1558528983	42.3236324288	441.4274358338
127.1558655240	42.3236324288	441.3630080449
127.1558781496	42.3236324288	441.2985802559
127.1558907752	42.3236324288	441.2341524668
127.1559034009	42.3236324288	441.1697246778
127.1559160265	42.3236324288	441.1052968888
127.1559286521	42.3236324288	441.0408690999
127.1559412778	42.3236324288	440.9764413108
127.1559539034	42.3236324288	440.9120135218
127.1559665291	42.3236324288	440.8475857328
127.1559791547	42.3236324288	440.7831579438
127.1559917803	42.3236324288	440.7187301548
127.1560044060	42.3236324288	440.6543023658
127.1560170316	42.3236324288	440.5898745768
127.1560296572	42.3236324288	440.5254467878
127.1560422829	42.3236324288	440.4610189988
127.1560549085	42.3236324288	440.3965912097
127.1560675342	42.3236324288	440.3321634208
127.1560801598	42.3236324288	440.2677356318
127.1560927854	42.3236324288	440.2033078428
127.1561054111	42.3236324288	440.1388897672
127.1561180367	42.3236324288	440.0747938206
127.1561306623	42.3236324288	440.0106978741
127.1561432880	42.3236324288	439.9466019274
127.1561559136	42.3236324288	439.8825059808
127.1561685393	42.3236324288	439.8184100342
127.1561811649	42.3236324288	439.7543140876
127.1561937905	42.3236324288	439.6902149492
127.1562064162	42.3236324288	439.6261051941
127.1562190418	42.3236324288	439.5620027799
127.1562316675	42.3236324288	439.4979068333
127.1562442931	42.3236324288	439.4338108866
127.1562569187	42.3236324288	439.3697149400
127.1562695444	42.3236324288	439.3056189934
127.1562821700	42.3236324288	439.2418104341
127.1562947956	42.3236324288	439.1783781723
127.1563074213	42.3236324288	439.1149590812
127.1563200469	42.3236324288	439.0515441662
127.1563326726	42.3236324288	438.9881119044
127.1563452982	42.3236324288	438.9246810297
127.1563579238	42.3236324288	438.8612529159
127.1563705495	42.3236324288	438.7978221686
127.1563831751	42.3236324288	438.7343899068
127.1563958007	42.3236324288	438.6709615248
127.1564084264	42.3236324288	438.6075356892
127.1564210520	42.3236324288	438.5441172358
127.1564336777	42.3236324288	438.4806936016
127.1564463033	42.3236324288	438.4172654878
127.1558150214	42.3236417220	441.4310287674
127.1558276470	42.3236417220	441.3666009784
127.1558402727	42.3236417220	441.3021731893
127.1558528983	42.3236417220	441.2377454003
127.1558655240	42.3236417220	441.1733176113
127.1558781496	42.3236417220	441.1088898224
127.1558907752	42.3236417220	441.0444620333
127.1559034009	42.3236417220	440.9800342443
127.1559160265	42.3236417220	440.9156064553
127.1559286521	42.3236417220	440.8511786663
127.1559412778	42.3236417220	440.7867508773
127.1559539034	42.3236417220	440.7223230883
127.1559665291	42.3236417220	440.6578952993
127.1559791547	42.3236417220	440.5934675103
127.1559917803	42.3236417220	440.5290397213
127.1560044060	42.3236417220	440.4646119322
127.1560170316	42.3236417220	440.4001841433
127.1560296572	42.3236417220	440.3357563543
127.1560422829	42.3236417220	440.2713285653
127.1560549085	42.3236417220	440.2069007762
127.1560675342	42.3236417220	440.1424729873
127.1560801598	42.3236417220	440.0780451983
127.1560927854	42.3236417220	440.0136174093
127.1561054111	42.3236417220	439.9492175448
127.1561180367	42.3236417220	439.8857437463
127.1561306623	42.3236417220	439.8222699477
127.1561432880	42.3236417220	439.7587961491
127.1561559136	42.3236417220	439.6953223504
127.1561685393	42.3236417220	439.6318485519
127.1561811649	42.3236417220	439.5683747533
127.1561937905	42.3236417220	439.5048995605
127.1562064162	42.3236417220	439.4414197303
127.1562190418	42.3236417220	439.3779431066
127.1562316675	42.3236417220	439.3144693081
127.1562442931	42.3236417220	439.2509955094
127.1562569187	42.3236417220	439.1875217108
127.1562695444	42.3236417220	439.1240479122
127.1562821700	42.3236417220	439.0614003032
127.1562947956	42.3236417220	438.9998344854
127.1563074213	42.3236417220	438.9382818383
127.1563200469	42.3236417220	438.8767333674
127.1563326726	42.3236417220	438.8151675496
127.1563452982	42.3236417220	438.7536057197
127.1563579238	42.3236417220	438.6920518268
127.1563705495	42.3236417220	438.6304903629
127.1563831751	42.3236417220	438.5689245452
127.1563958007	42.3236417220	438.5073698814
127.1564084264	42.3236417220	438.4458145986
127.1564210520	42.3236417220	438.3842548125
127.1564336777	42.3236417220	438.3226981868
127.1564463033	42.3236417220	438.2611442939
127.1558150214	42.3236510152	441.2413383337
127.1558276470	42.3236510152	441.1769105447
127.1558402727	42.3236510152	441.1124827557
127.1558528983	42.3236510152	441.0480549666
127.1558655240	42.3236510152	440.9836271777
127.1558781496	42.3236510152	440.9191993887
127.1558907752	42.3236510152	440.8547715997
127.1559034009	42.3236510152	440.7903438106
127.1559160265	42.3236510152	440.7259160217
127.1559286521	42.3236510152	440.6614882327
127.1559412778	42.3236510152	440.5970604436
127.1559539034	42.3236510152	440.5326326546
127.1559665291	42.3236510152	440.4682048656
127.1559791547	42.3236510152	440.4037770767
127.1559917803	42.3236510152	440.3393492876
127.1560044060	42.3236510152	440.2749214986
127.1560170316	42.3236510152	440.2104937096
127.1560296572	42.3236510152	440.1460659207
127.1560422829	42.3236510152	440.0816381316
127.1560549085	42.3236510152	440.0172103426
127.1560675342	42.3236510152	439.9527825536
127.1560801598	42.3236510152	439.8883547646
127.1560927854	42.3236510152	439.8239269756
127.1561054111	42.3236510152	439.7595453223
127.1561180367	42.3236510152	439.6966936718
127.1561306623	42.3236510152	439.6338420212
127.1561432880	42.3236510152	439.5709903706
127.1561559136	42.3236510152	439.5081387200
127.1561685393	42.3236510152	439.4452870694
127.1561811649	42.3236510152	439.3824354189
127.1561937905	42.3236510152	439.3195841717
127.1562064162	42.3236510152	439.2567342663
127.1562190418	42.3236510152	439.1938834332
127.1562316675	42.3236510152	439.1310317827
127.1562442931	42.3236510152	439.0681801321
127.1562569187	42.3236510152	439.0053284814
127.1562695444	42.3236510152	438.9424768309
127.1562821700	42.3236510152	438.8809909278
127.1562947956	42.3236510152	438.8212932993
127.1563074213	42.3236510152	438.7616062814
127.1563200469	42.3236510152	438.7019226277
127.1563326726	42.3236510152	438.6422249992
127.1563452982	42.3236510152	438.5825327921
127.1563579238	42.3236510152	438.5228513748
127.1563705495	42.3236510152	438.4631596652
127.1563831751	42.3236510152	438.4034620367
127.1563958007	42.3236510152	438.3437779391
127.1564084264	42.3236510152	438.2840913650
127.1564210520	42.3236510152	438.2243937366
127.1564336777	42.3236510152	438.1647048021
127.1564463033	42.3236510152	438.1050233848
127.1558150214	42.3236603084	441.0516479000
127.1558276470	42.3236603084	440.9872201111
127.1558402727	42.3236603084	440.9227923220
127.1558528983	42.3236603084	440.8583645330
127.1558655240	42.3236603084	440.7939367440
127.1558781496	42.3236603084	440.7295089550
127.1558907752	42.3236603084	440.6650811660
127.1559034009	42.3236603084	440.6006533770
127.1559160265	42.3236603084	440.5362255880
127.1559286521	42.3236603084	440.4717977990
127.1559412778	42.3236603084	440.4073700100
127.1559539034	42.3236603084	440.3429422209
127.1559665291	42.3236603084	440.2785144320
127.1559791547	42.3236603084	440.2140866430
127.1559917803	42.3236603084	440.1496588540
127.1560044060	42.3236603084	440.0852310649
127.1560170316	42.3236603084	440.0208032760
127.1560296572	42.3236603084	439.9563754870
127.1560422829	42.3236603084	439.8919476979
127.1560549085	42.3236603084	439.8275199089
127.1560675342	42.3236603084	439.7630921199
127.1560801598	42.3236603084	439.6986643310
127.1560927854	42.3236603084	439.6342365419
127.1561054111	42.3236603084	439.5698730998
127.1561180367	42.3236603084	439.5076435973
127.1561306623	42.3236603084	439.4454140947
127.1561432880	42.3236603084	439.3831845921
127.1561559136	42.3236603084	439.3209550895
127.1561685393	42.3236603084	439.2587255870
127.1561811649	42.3236603084	439.1964960844
127.1561937905	42.3236603084	439.1342687828
127.1562064162	42.3236603084	439.0720488023
127.1562190418	42.3236603084	439.0098237598
127.1562316675	42.3236603084	438.9475942573
127.1562442931	42.3236603084	438.8853647547
127.1562569187	42.3236603084	438.8231352521
127.1562695444	42.3236603084	438.7609057496
127.1562821700	42.3236603084	438.7005841643
127.1562947956	42.3236603084	438.6427607567
127.1563074213	42.3236603084	438.5849365512
127.1563200469	42.3236603084	438.5271120928
127.1563326726	42.3236603084	438.4692886852
127.1563452982	42.3236603084	438.4114680982
127.1563579238	42.3236603084	438.3536531250
127.1563705495	42.3236603084	438.2958327969
127.1563831751	42.3236603084	438.2380093893
127.1563958007	42.3236603084	438.1801849642
127.1564084264	42.3236603084	438.1223607254
127.1564210520	42.3236603084	438.0645373178
127.1564336777	42.3236603084	438.0067184335
127.1564463033	42.3236603084	437.9489034603
127.1558150214	42.3236696016	440.8619574665
127.1558276470	42.3236696016	440.7975296775
127.1558402727	42.3236696016	440.7331018885
127.1558528983	42.3236696016	440.6686740995
127.1558655240	42.3236696016	440.6042463105
127.1558781496	42.3236696016	440.5398185215
127.1558907752	42.3236696016	440.4753907325
127.1559034009	42.3236696016	440.4109629434
127.1559160265	42.3236696016	440.3465351545
127.1559286521	42.3236696016	440.2821073655
127.1559412778	42.3236696016	440.2176795765
127.1559539034	42.3236696016	440.1532517874
127.1559665291	42.3236696016	440.0888239985
127.1559791547	42.3236696016	440.0243962095
127.1559917803	42.3236696016	439.9599684205
127.1560044060	42.3236696016	439.8955406314
127.1560170316	42.3236696016	439.8311128424
127.1560296572	42.3236696016	439.7666850535
127.1560422829	42.3236696016	439.7022572644
127.1560549085	42.3236696016	439.6378294754
127.1560675342	42.3236696016	439.5734016864
127.1560801598	42.3236696016	439.5089738975
127.1560927854	42.3236696016	439.4445461084
127.1561054111	42.3236696016	439.3802008774
127.1561180367	42.3236696016	439.3185935229
127.1561306623	42.3236696016	439.2569861684
127.1561432880	42.3236696016	439.1953788138
127.1561559136	42.3236696016	439.1337714592
127.1561685393	42.3236696016	439.0721641047
127.1561811649	42.3236696016	439.0105567502
127.1561937905	42.3236696016	438.9489533941
127.1562064162	42.3236696016	438.8873633385
127.1562190418	42.3236696016	438.8257640866
127.1562316675	42.3236696016	438.7641567321
127.1562442931	42.3236696016	438.7025493775
127.1562569187	42.3236696016	438.6409420229
127.1562695444	42.3236696016	438.5793346684
127.1562821700	42.3236696016	438.5201774008
127.1562947956	42.3236696016	438.4642282141
127.1563074213	42.3236696016	438.4082668211
127.1563200469	42.3236696016	438.3523015580
127.1563326726	42.3236696016	438.2963523713
127.1563452982	42.3236696016	438.2404034045
127.1563579238	42.3236696016	438.1844548753
127.1563705495	42.3236696016	438.1285059287
127.1563831751	42.3236696016	438.0725567420
127.1563958007	42.3236696016	438.0165919895
127.1564084264	42.3236696016	437.9606300858
127.1564210520	42.3236696016	437.9046808991
127.1564336777	42.3236696016	437.8487320651
127.1564463033	42.3236696016	437.7927835359
127.1558150214	42.3236788948	440.6722670329
127.1558276470	42.3236788948	440.6078392439
127.1558402727	42.3236788948	440.5434114548
127.1558528983	42.3236788948	440.4789836658
127.1558655240	42.3236788948	440.4145558768
127.1558781496	42.3236788948	440.3501280879
127.1558907752	42.3236788948	440.2857002988
127.1559034009	42.3236788948	440.2212725098
127.1559160265	42.3236788948	440.1568447208
127.1559286521	42.3236788948	440.0924169318
127.1559412778	42.3236788948	440.0279891428
127.1559539034	42.3236788948	439.9635613538
127.1559665291	42.3236788948	439.8991335648
127.1559791547	42.3236788948	439.8347057758
127.1559917803	42.3236788948	439.7702779868
127.1560044060	42.3236788948	439.7058501977
127.1560170316	42.3236788948	439.6414224088
127.1560296572	42.3236788948	439.5769946198
127.1560422829	42.3236788948	439.5125668308
127.1560549085	42.3236788948	439.4481390417
127.1560675342	42.3236788948	439.3837112528
127.1560801598	42.3236788948	439.3192834638
127.1560927854	42.3236788948	439.2548556748
127.1561054111	42.3236788948	439.1905286549
127.1561180367	42.3236788948	439.1295434484
127.1561306623	42.3236788948	439.0685582419
127.1561432880	42.3236788948	439.0075730353
127.1561559136	42.3236788948	438.9465923154
127.1561685393	42.3236788948	438.8856142283
127.1561811649	42.3236788948	438.8246295153
127.1561937905	42.3236788948	438.7636468137
127.1562064162	42.3236788948	438.7026724442
127.1562190418	42.3236788948	438.6416960984
127.1562316675	42.3236788948	438.5807180112
127.1562442931	42.3236788948	438.5197340001
127.1562569187	42.3236788948	438.4587487935
127.1562695444	42.3236788948	438.3977635870
127.1562821700	42.3236788948	438.3397675545
127.1562947956	42.3236788948	438.2856854693
127.1563074213	42.3236788948	438.2315954352
127.1563200469	42.3236788948	438.1775028810
127.1563326726	42.3236788948	438.1234207958
127.1563452982	42.3236788948	438.0693387106
127.1563579238	42.3236788948	438.0152566254
127.1563705495	42.3236788948	437.9611745403
127.1563831751	42.3236788948	437.9070924552
127.1563958007	42.3236788948	437.8530002334
127.1564084264	42.3236788948	437.7989098668
127.1564210520	42.3236788948	437.7448277817
127.1564336777	42.3236788948	437.6907456965
127.1564463033	42.3236788948	437.6366636113
127.1558150214	42.3236881880	440.4825765992
127.1558276470	42.3236881880	440.4181488102
127.1558402727	42.3236881880	440.3537210212
127.1558528983	42.3236881880	440.2892932321
127.1558655240	42.3236881880	440.2248654432
127.1558781496	42.3236881880	440.1604376542
127.1558907752	42.3236881880	440.0960098652
127.1559034009	42.3236881880	440.0315820761
127.1559160265	42.3236881880	439.9671542872
127.1559286521	42.3236881880	439.9027264982
127.1559412778	42.3236881880	439.8382987091
127.1559539034	42.3236881880	439.7738709201
127.1559665291	42.3236881880	439.7094431311
127.1559791547	42.3236881880	439.6450153422
127.1559917803	42.3236881880	439.5805875531
127.1560044060	42.3236881880	439.5161597641
127.1560170316	42.3236881880	439.4517319751
127.1560296572	42.3236881880	439.3873041862
127.1560422829	42.3236881880	439.3228763971
127.1560549085	42.3236881880	439.2584486081
127.1560675342	42.3236881880	439.1940208191
127.1560801598	42.3236881880	439.1295930301
127.1560927854	42.3236881880	439.0651652411
127.1561054111	42.3236881880	439.0008564324
127.1561180367	42.3236881880	438.9404933739
127.1561306623	42.3236881880	438.8801303154
127.1561432880	42.3236881880	438.8197672568
127.1561559136	42.3236881880	438.7594135860
127.1561685393	42.3236881880	438.6990654237
127.1561811649	42.3236881880	438.6387033979
127.1561937905	42.3236881880	438.5783410467
127.1562064162	42.3236881880	438.5179810483
127.1562190418	42.3236881880	438.4576273423
127.1562316675	42.3236881880	438.3972791800
127.1562442931	42.3236881880	438.3369186227
127.1562569187	42.3236881880	438.2765555642
127.1562695444	42.3236881880	438.2161925057
127.1562821700	42.3236881880	438.1593574234
127.1562947956	42.3236881880	438.1071417823
127.1563074213	42.3236881880	438.0549238964
127.1563200469	42.3236881880	438.0027052990
127.1563326726	42.3236881880	437.9504896579
127.1563452982	42.3236881880	437.8982740168
127.1563579238	42.3236881880	437.8460583756
127.1563705495	42.3236881880	437.7938427345
127.1563831751	42.3236881880	437.7416270934
127.1563958007	42.3236881880	437.6894085898
127.1564084264	42.3236881880	437.6371906101
127.1564210520	42.3236881880	437.5849749690
127.1564336777	42.3236881880	437.5327593279
127.1564463033	42.3236881880	437.4805436868
127.1558150214	42.3236974812	440.2928861657
127.1558276470	42.3236974812	440.2284583767
127.1558402727	42.3236974812	440.1640305877
127.1558528983	42.3236974812	440.0996027986
127.1558655240	42.3236974812	440.0351750097
127.1558781496	42.3236974812	439.9707472207
127.1558907752	42.3236974812	439.9063194316
127.1559034009	42.3236974812	439.8418916426
127.1559160265	42.3236974812	439.7774638536
127.1559286521	42.3236974812	439.7130360647
127.1559412778	42.3236974812	439.6486082756
127.1559539034	42.3236974812	439.5841804866
127.1559665291	42.3236974812	439.5197526976
127.1559791547	42.3236974812	439.4553249087
127.1559917803	42.3236974812	439.3908971196
127.1560044060	42.3236974812	439.3264693306
127.1560170316	42.3236974812	439.2620415416
127.1560296572	42.3236974812	439.1976137526
127.1560422829	42.3236974812	439.1331859636
127.1560549085	42.3236974812	439.0687581746
127.1560675342	42.3236974812	439.0043303856
127.1560801598	42.3236974812	438.9399025966
127.1560927854	42.3236974812	438.8754748076
127.1561054111	42.3236974812	438.8111842100
127.1561180367	42.3236974812	438.7514432995
127.1561306623	42.3236974812	438.6917039443
127.1561432880	42.3236974812	438.6319677504
127.1561559136	42.3236974812	438.5722369278
127.1561685393	42.3236974812	438.5125092572
127.1561811649	42.3236974812	438.4527736542
127.1561937905	42.3236974812	438.3930363700
127.1562064162	42.3236974812	438.3332954595
127.1562190418	42.3236974812	438.2735615875
127.1562316675	42.3236974812	438.2138339169
127.1562442931	42.3236974812	438.1540991541
127.1562569187	42.3236974812	438.0943623350
127.1562695444	42.3236974812	438.0346214245
127.1562821700	42.3236974812	437.9789472925
127.1562947956	42.3236974812	437.9285980954
127.1563074213	42.3236974812	437.8782488982
127.1563200469	42.3236974812	437.8278998613
127.1563326726	42.3236974812	437.7775553809
127.1563452982	42.3236974812	437.7272093230
127.1563579238	42.3236974812	437.6768601259
127.1563705495	42.3236974812	437.6265109289
127.1563831751	42.3236974812	437.5761617318
127.1563958007	42.3236974812	437.5258125347
127.1564084264	42.3236974812	437.4754633376
127.1564210520	42.3236974812	437.4251141406
127.1564336777	42.3236974812	437.3747649435
127.1564463033	42.3236974812	437.3244157464
127.1558150214	42.3237067744	440.1031957320
127.1558276470	42.3237067744	440.0387679430
127.1558402727	42.3237067744	439.9743401540
127.1558528983	42.3237067744	439.9099123650
127.1558655240	42.3237067744	439.8454845760
127.1558781496	42.3237067744	439.7810567870
127.1558907752	42.3237067744	439.7166289980
127.1559034009	42.3237067744	439.6522012089
127.1559160265	42.3237067744	439.5877734200
127.1559286521	42.3237067744	439.5233456310
127.1559412778	42.3237067744	439.4589178420
127.1559539034	42.3237067744	439.3944900529
127.1559665291	42.3237067744	439.3300622640
127.1559791547	42.3237067744	439.2656344750
127.1559917803	42.3237067744	439.2012066860
127.1560044060	42.3237067744	439.1367788969
127.1560170316	42.3237067744	439.0723511079
127.1560296572	42.3237067744	439.0079233190
127.1560422829	42.3237067744	438.9434955299
127.1560549085	42.3237067744	438.8790677409
127.1560675342	42.3237067744	438.8146399519
127.1560801598	42.3237067744	438.7502121630
127.1560927854	42.3237067744	438.6857843739
127.1561054111	42.3237067744	438.6215119875
127.1561180367	42.3237067744	438.5623932250
127.1561306623	42.3237067744	438.5032785822
127.1561432880	42.3237067744	438.4441723131
127.1561559136	42.3237067744	438.3850616133
127.1561685393	42.3237067744	438.3259483139
127.1561811649	42.3237067744	438.2668415575
127.1561937905	42.3237067744	438.2077324006
127.1562064162	42.3237067744	438.1486136381
127.1562190418	42.3237067744	438.0894977798
127.1562316675	42.3237067744	438.0303844804
127.1562442931	42.3237067744	437.9712770307
127.1562569187	42.3237067744	437.9121691056
127.1562695444	42.3237067744	437.8530503432
127.1562821700	42.3237067744	437.7985371614
127.1562947956	42.3237067744	437.7500544083
127.1563074213	42.3237067744	437.7015716553
127.1563200469	42.3237067744	437.6530893264
127.1563326726	42.3237067744	437.6046190669
127.1563452982	42.3237067744	437.5561446292
127.1563579238	42.3237067744	437.5076618761
127.1563705495	42.3237067744	437.4591791231
127.1563831751	42.3237067744	437.4106963701
127.1563958007	42.3237067744	437.3622136170
127.1564084264	42.3237067744	437.3137308639
127.1564210520	42.3237067744	437.2652481109
127.1564336777	42.3237067744	437.2167653579
127.1564463033	42.3237067744	437.1682826049
127.1558150214	42.3237160676	439.9135052984
127.1558276470	42.3237160676	439.8490775094
127.1558402727	42.3237160676	439.7846497203
127.1558528983	42.3237160676	439.7202219313
127.1558655240	42.3237160676	439.6557941423
127.1558781496	42.3237160676	439.5913663534
127.1558907752	42.3237160676	439.5269385643
127.1559034009	42.3237160676	439.4625107753
127.1559160265	42.3237160676	439.3980829863
127.1559286521	42.3237160676	439.3336551973
127.1559412778	42.3237160676	439.2692274083
127.1559539034	42.3237160676	439.2047996193
127.1559665291	42.3237160676	439.1403718303
127.1559791547	42.3237160676	439.0759440413
127.1559917803	42.3237160676	439.0115162523
127.1560044060	42.3237160676	438.9470884632
127.1560170316	42.3237160676	438.8826606743
127.1560296572	42.3237160676	438.8182328853
127.1560422829	42.3237160676	438.7538050963
127.1560549085	42.3237160676	438.6893773072
127.1560675342	42.3237160676	438.6249495183
127.1560801598	42.3237160676	438.5605217293
127.1560927854	42.3237160676	438.4960939403
127.1561054111	42.3237160676	438.4318397650
127.1561180367	42.3237160676	438.3733431505
127.1561306623	42.3237160676	438.3148524570
127.1561432880	42.3237160676	438.2563737990
127.1561559136	42.3237160676	438.1978852828
127.1561685393	42.3237160676	438.1393909822
127.1561811649	42.3237160676	438.0809090864
127.1561937905	42.3237160676	438.0224244988
127.1562064162	42.3237160676	437.9639278842
127.1562190418	42.3237160676	437.9054324998
127.1562316675	42.3237160676	437.8469381992
127.1562442931	42.3237160676	437.7884569145
127.1562569187	42.3237160676	437.7299758763
127.1562695444	42.3237160676	437.6714792618
127.1562821700	42.3237160676	437.6181270303
127.1562947956	42.3237160676	437.5715107213
127.1563074213	42.3237160676	437.5248961094
127.1563200469	42.3237160676	437.4782825669
127.1563326726	42.3237160676	437.4316819005
127.1563452982	42.3237160676	437.3850767767
127.1563579238	42.3237160676	437.3384627815
127.1563705495	42.3237160676	437.2918473173
127.1563831751	42.3237160676	437.2452310083
127.1563958007	42.3237160676	437.1986168636
127.1564084264	42.3237160676	437.1520023227
127.1564210520	42.3237160676	437.1053860137
127.1564336777	42.3237160676	437.0587697048
127.1564463033	42.3237160676	437.0121533958
127.1558150214	42.3237253608	439.7238148648
127.1558276470	42.3237253608	439.6593870759
127.1558402727	42.3237253608	439.5949592868
127.1558528983	42.3237253608	439.5305314978
127.1558655240	42.3237253608	439.4661037088
127.1558781496	42.3237253608	439.4016759199
127.1558907752	42.3237253608	439.3372481308
127.1559034009	42.3237253608	439.2728203418
127.1559160265	42.3237253608	439.2083925528
127.1559286521	42.3237253608	439.1439647638
127.1559412778	42.3237253608	439.0795369748
127.1559539034	42.3237253608	439.0151091858
127.1559665291	42.3237253608	438.9506813968
127.1559791547	42.3237253608	438.8862536078
127.1559917803	42.3237253608	438.8218258188
127.1560044060	42.3237253608	438.7573980297
127.1560170316	42.3237253608	438.6929702408
127.1560296572	42.3237253608	438.6285424518
127.1560422829	42.3237253608	438.5641146628
127.1560549085	42.3237253608	438.4996868737
127.1560675342	42.3237253608	438.4352590847
127.1560801598	42.3237253608	438.3708312958
127.1560927854	42.3237253608	438.3064035067
127.1561054111	42.3237253608	438.2421675426
127.1561180367	42.3237253608	438.1842930762
127.1561306623	42.3237253608	438.1264245307
127.1561432880	42.3237253608	438.0685680206
127.1561559136	42.3237253608	438.0107065535
127.1561685393	42.3237253608	437.9528421778
127.1561811649	42.3237253608	437.8949757313
127.1561937905	42.3237253608	437.8371073125
127.1562064162	42.3237253608	437.7792328460
127.1562190418	42.3237253608	437.7213637439
127.1562316675	42.3237253608	437.6634993681
127.1562442931	42.3237253608	437.6056415372
127.1562569187	42.3237253608	437.5477826471
127.1562695444	42.3237253608	437.4899081806
127.1562821700	42.3237253608	437.4377168994
127.1562947956	42.3237253608	437.3929670344
127.1563074213	42.3237253608	437.3482245708
127.1563200469	42.3237253608	437.3034847210
127.1563326726	42.3237253608	437.2587427218
127.1563452982	42.3237253608	437.2140014667
127.1563579238	42.3237253608	437.1692616924
127.1563705495	42.3237253608	437.1245155117
127.1563831751	42.3237253608	437.0797656467
127.1563958007	42.3237253608	437.0350252202
127.1564084264	42.3237253608	436.9902830662
127.1564210520	42.3237253608	436.9455332013
127.1564336777	42.3237253608	436.9007833363
127.1564463033	42.3237253608	436.8560334713
127.1558150214	42.3237346540	439.5341244312
127.1558276470	42.3237346540	439.4696966422
127.1558402727	42.3237346540	439.4052688532
127.1558528983	42.3237346540	439.3408410641
127.1558655240	42.3237346540	439.2764132752
127.1558781496	42.3237346540	439.2119854862
127.1558907752	42.3237346540	439.1475576971
127.1559034009	42.3237346540	439.0831299081
127.1559160265	42.3237346540	439.0187021191
127.1559286521	42.3237346540	438.9542743302
127.1559412778	42.3237346540	438.8898465411
127.1559539034	42.3237346540	438.8254187521
127.1559665291	42.3237346540	438.7609909631
127.1559791547	42.3237346540	438.6965631742
127.1559917803	42.3237346540	438.6321353851
127.1560044060	42.3237346540	438.5677075961
127.1560170316	42.3237346540	438.5032798071
127.1560296572	42.3237346540	438.4388520181
127.1560422829	42.3237346540	438.3744242291
127.1560549085	42.3237346540	438.3099964401
127.1560675342	42.3237346540	438.2455686511
127.1560801598	42.3237346540	438.1811408621
127.1560927854	42.3237346540	438.1167130731
127.1561054111	42.3237346540	438.0524953201
127.1561180367	42.3237346540	437.9952430017
127.1561306623	42.3237346540	437.9379966042
127.1561432880	42.3237346540	437.8807622422
127.1561559136	42.3237346540	437.8235278241
127.1561685393	42.3237346540	437.7662933732
127.1561811649	42.3237346540	437.7090423762
127.1561937905	42.3237346540	437.6517901261
127.1562064162	42.3237346540	437.5945378076
127.1562190418	42.3237346540	437.5372949877
127.1562316675	42.3237346540	437.4800605368
127.1562442931	42.3237346540	437.4228261599
127.1562569187	42.3237346540	437.3655894177
127.1562695444	42.3237346540	437.3083370993
127.1562821700	42.3237346540	437.2573067683
127.1562947956	42.3237346540	437.2144233474
127.1563074213	42.3237346540	437.1715530320
127.1563200469	42.3237346540	437.1286868750
127.1563326726	42.3237346540	437.0858035430
127.1563452982	42.3237346540	437.0429261566
127.1563579238	42.3237346540	437.0000606032
127.1563705495	42.3237346540	436.9571837059
127.1563831751	42.3237346540	436.9143002850
127.1563958007	42.3237346540	436.8714335766
127.1564084264	42.3237346540	436.8285638095
127.1564210520	42.3237346540	436.7856803886
127.1564336777	42.3237346540	436.7427969678
127.1564463033	42.3237346540	436.6999135468
127.1558150214	42.3237439472	439.3444272566
127.1558276470	42.3237439472	439.2800062085
127.1558402727	42.3237439472	439.2155784195
127.1558528983	42.3237439472	439.1511506305
127.1558655240	42.3237439472	439.0867228415
127.1558781496	42.3237439472	439.0222950525
127.1558907752	42.3237439472	438.9578672635
127.1559034009	42.3237439472	438.8934394744
127.1559160265	42.3237439472	438.8290116855
127.1559286521	42.3237439472	438.7645838965
127.1559412778	42.3237439472	438.7001561075
127.1559539034	42.3237439472	438.6357283184
127.1559665291	42.3237439472	438.5713005295
127.1559791547	42.3237439472	438.5068727405
127.1559917803	42.3237439472	438.4424449515
127.1560044060	42.3237439472	438.3780171624
127.1560170316	42.3237439472	438.3135893734
127.1560296572	42.3237439472	438.2491615845
127.1560422829	42.3237439472	438.1847337954
127.1560549085	42.3237439472	438.1203060064
127.1560675342	42.3237439472	438.0558782174
127.1560801598	42.3237439472	437.9914504285
127.1560927854	42.3237439472	437.9270226394
127.1561054111	42.3237439472	437.8628233226
127.1561180367	42.3237439472	437.8062008401
127.1561306623	42.3237439472	437.7495792086
127.1561432880	42.3237439472	437.6929593066
127.1561559136	42.3237439472	437.6363442497
127.1561685393	42.3237439472	437.5797320357
127.1561811649	42.3237439472	437.5231031101
127.1561937905	42.3237439472	437.4664747167
127.1562064162	42.3237439472	437.4098522341
127.1562190418	42.3237439472	437.3532352105
127.1562316675	42.3237439472	437.2966229965
127.1562442931	42.3237439472	437.2400043855
127.1562569187	42.3237439472	437.1833841415
127.1562695444	42.3237439472	437.1267616590
127.1562821700	42.3237439472	437.0768999662
127.1562947956	42.3237439472	437.0358906772
127.1563074213	42.3237439472	436.9948832811
127.1563200469	42.3237439472	436.9538764852
127.1563326726	42.3237439472	436.9128671963
127.1563452982	42.3237439472	436.8718613413
127.1563579238	42.3237439472	436.8308623209
127.1563705495	42.3237439472	436.7898519001
127.1563831751	42.3237439472	436.7488349232
127.1563958007	42.3237439472	436.7078347421
127.1564084264	42.3237439472	436.6668333000
127.1564210520	42.3237439472	436.6258240111
127.1564336777	42.3237439472	436.5848105992
127.1564463033	42.3237439472	436.5437936223
127.1558150214	42.3237532404	439.1547300042
127.1558276470	42.3237532404	439.0903157750
127.1558402727	42.3237532404	439.0258879860
127.1558528983	42.3237532404	438.9614601969
127.1558655240	42.3237532404	438.8970324080
127.1558781496	42.3237532404	438.8326046190
127.1558907752	42.3237532404	438.7681768300
127.1559034009	42.3237532404	438.7037490409
127.1559160265	42.3237532404	438.6393212520
127.1559286521	42.3237532404	438.5748934630
127.1559412778	42.3237532404	438.5104656740
127.1559539034	42.3237532404	438.4460378849
127.1559665291	42.3237532404	438.3816100959
127.1559791547	42.3237532404	438.3171823070
127.1559917803	42.3237532404	438.2527545179
127.1560044060	42.3237532404	438.1883267289
127.1560170316	42.3237532404	438.1238989399
127.1560296572	42.3237532404	438.0594711510
127.1560422829	42.3237532404	437.9950433619
127.1560549085	42.3237532404	437.9306155729
127.1560675342	42.3237532404	437.8661877839
127.1560801598	42.3237532404	437.8017599949
127.1560927854	42.3237532404	437.7373322059
127.1561054111	42.3237532404	437.6731513279
127.1561180367	42.3237532404	437.6171587703
127.1561306623	42.3237532404	437.5611619349
127.1561432880	42.3237532404	437.5051564041
127.1561559136	42.3237532404	437.4491606194
127.1561685393	42.3237532404	437.3931705534
127.1561811649	42.3237532404	437.3371637758
127.1561937905	42.3237532404	437.2811593280
127.1562064162	42.3237532404	437.2251667703
127.1562190418	42.3237532404	437.1691755372
127.1562316675	42.3237532404	437.1131854713
127.1562442931	42.3237532404	437.0571825373
127.1562569187	42.3237532404	437.0011787261
127.1562695444	42.3237532404	436.9451861685
127.1562821700	42.3237532404	436.8964932028
127.1562947956	42.3237532404	436.8573581347
127.1563074213	42.3237532404	436.8182135511
127.1563200469	42.3237532404	436.7790659504
127.1563326726	42.3237532404	436.7399308824
127.1563452982	42.3237532404	436.7007966476
127.1563579238	42.3237532404	436.6616640712
127.1563705495	42.3237532404	436.6225200944
127.1563831751	42.3237532404	436.5833695616
127.1563958007	42.3237532404	436.5442358245
127.1564084264	42.3237532404	436.5051026605
127.1564210520	42.3237532404	436.4659675925
127.1564336777	42.3237532404	436.4268242307
127.1564463033	42.3237532404	436.3876736979
127.1558150214	42.3237625336	438.9650330376
127.1558276470	42.3237625336	438.9006170101
127.1558402727	42.3237625336	438.8361945062
127.1558528983	42.3237625336	438.7717697633
127.1558655240	42.3237625336	438.7073419743
127.1558781496	42.3237625336	438.6429141854
127.1558907752	42.3237625336	438.5784863963
127.1559034009	42.3237625336	438.5140586073
127.1559160265	42.3237625336	438.4496308183
127.1559286521	42.3237625336	438.3852030293
127.1559412778	42.3237625336	438.3207752403
127.1559539034	42.3237625336	438.2563474513
127.1559665291	42.3237625336	438.1919196623
127.1559791547	42.3237625336	438.1274918733
127.1559917803	42.3237625336	438.0630640843
127.1560044060	42.3237625336	437.9986362952
127.1560170316	42.3237625336	437.9342085063
127.1560296572	42.3237625336	437.8697807173
127.1560422829	42.3237625336	437.8053529283
127.1560549085	42.3237625336	437.7409251392
127.1560675342	42.3237625336	437.6764973502
127.1560801598	42.3237625336	437.6120695613
127.1560927854	42.3237625336	437.5476417722
127.1561054111	42.3237625336	437.4834791783
127.1561180367	42.3237625336	437.4281112604
127.1561306623	42.3237625336	437.3727391642
127.1561432880	42.3237625336	437.3173585749
127.1561559136	42.3237625336	437.2619826404
127.1561685393	42.3237625336	437.2066094374
127.1561811649	42.3237625336	437.1512293602
127.1561937905	42.3237625336	437.0958516998
127.1562064162	42.3237625336	437.0404837818
127.1562190418	42.3237625336	436.9851130542
127.1562316675	42.3237625336	436.9297398511
127.1562442931	42.3237625336	436.8743605021
127.1562569187	42.3237625336	436.8189815924
127.1562695444	42.3237625336	436.7636136744
127.1562821700	42.3237625336	436.7160841507
127.1562947956	42.3237625336	436.6788180183
127.1563074213	42.3237625336	436.6415425917
127.1563200469	42.3237625336	436.6042642184
127.1563326726	42.3237625336	436.5669980861
127.1563452982	42.3237625336	436.5297319537
127.1563579238	42.3237625336	436.4924658214
127.1563705495	42.3237625336	436.4551882887
127.1563831751	42.3237625336	436.4179041999
127.1563958007	42.3237625336	436.3806369068
127.1564084264	42.3237625336	436.3433707745
127.1564210520	42.3237625336	436.3061046422
127.1564336777	42.3237625336	436.2688317143
127.1564463033	42.3237625336	436.2315529106
127.1558150214	42.3237718268	438.7753362058
127.1558276470	42.3237718268	438.7109143174
127.1558402727	42.3237718268	438.6464995904
127.1558528983	42.3237718268	438.5820793296
127.1558655240	42.3237718268	438.5176515407
127.1558781496	42.3237718268	438.4532237517
127.1558907752	42.3237718268	438.3887959626
127.1559034009	42.3237718268	438.3243681736
127.1559160265	42.3237718268	438.2599403846
127.1559286521	42.3237718268	438.1955125957
127.1559412778	42.3237718268	438.1310848066
127.1559539034	42.3237718268	438.0666570176
127.1559665291	42.3237718268	438.0022292286
127.1559791547	42.3237718268	437.9378014397
127.1559917803	42.3237718268	437.8733736506
127.1560044060	42.3237718268	437.8089458616
127.1560170316	42.3237718268	437.7445180726
127.1560296572	42.3237718268	437.6800902836
127.1560422829	42.3237718268	437.6156624946
127.1560549085	42.3237718268	437.5512347056
127.1560675342	42.3237718268	437.4868069166
127.1560801598	42.3237718268	437.4223791276
127.1560927854	42.3237718268	437.3579513386
127.1561054111	42.3237718268	437.2938069558
127.1561180367	42.3237718268	437.2390611859
127.1561306623	42.3237718268	437.1843138021
127.1561432880	42.3237718268	437.1295631376
127.1561559136	42.3237718268	437.0748073259
127.1561685393	42.3237718268	437.0200484940
127.1561811649	42.3237718268	436.9652972634
127.1561937905	42.3237718268	436.9105477303
127.1562064162	42.3237718268	436.8558019604
127.1562190418	42.3237718268	436.8010492465
127.1562316675	42.3237718268	436.7462904146
127.1562442931	42.3237718268	436.6915383787
127.1562569187	42.3237718268	436.6367883630
127.1562695444	42.3237718268	436.5820425931
127.1562821700	42.3237718268	436.5356740196
127.1562947956	42.3237718268	436.5002743313
127.1563074213	42.3237718268	436.4648710530
127.1563200469	42.3237718268	436.4294666364
127.1563326726	42.3237718268	436.3940669482
127.1563452982	42.3237718268	436.3586672598
127.1563579238	42.3237718268	436.3232675715
127.1563705495	42.3237718268	436.2878564829
127.1563831751	42.3237718268	436.2524388381
127.1563958007	42.3237718268	436.2170379891
127.1564084264	42.3237718268	436.1816383008
127.1564210520	42.3237718268	436.1462386125
127.1564336777	42.3237718268	436.1108362994
127.1564463033	42.3237718268	436.0754317166
127.1558150214	42.3237811200	438.5856417456
127.1558276470	42.3237811200	438.5212161686
127.1558402727	42.3237811200	438.4568063360
127.1558528983	42.3237811200	438.3923888961
127.1558655240	42.3237811200	438.3279611071
127.1558781496	42.3237811200	438.2635333182
127.1558907752	42.3237811200	438.1991055291
127.1559034009	42.3237811200	438.1346777401
127.1559160265	42.3237811200	438.0702499511
127.1559286521	42.3237811200	438.0058221622
127.1559412778	42.3237811200	437.9413943731
127.1559539034	42.3237811200	437.8769665841
127.1559665291	42.3237811200	437.8125387951
127.1559791547	42.3237811200	437.7481110061
127.1559917803	42.3237811200	437.6836832171
127.1560044060	42.3237811200	437.6192554281
127.1560170316	42.3237811200	437.5548276391
127.1560296572	42.3237811200	437.4903998501
127.1560422829	42.3237811200	437.4259720611
127.1560549085	42.3237811200	437.3615442720
127.1560675342	42.3237811200	437.2971164831
127.1560801598	42.3237811200	437.2326886941
127.1560927854	42.3237811200	437.1682609051
127.1561054111	42.3237811200	437.1041347334
127.1561180367	42.3237811200	437.0500111115
127.1561306623	42.3237811200	436.9958874896
127.1561432880	42.3237811200	436.9417638677
127.1561559136	42.3237811200	436.8876307459
127.1561685393	42.3237811200	436.8334920499
127.1561811649	42.3237811200	436.7793673830
127.1561937905	42.3237811200	436.7252430948
127.1562064162	42.3237811200	436.6711165905
127.1562190418	42.3237811200	436.6169836049
127.1562316675	42.3237811200	436.5628449089
127.1562442931	42.3237811200	436.5087187558
127.1562569187	42.3237811200	436.4545951338
127.1562695444	42.3237811200	436.4004715119
127.1562821700	42.3237811200	436.3552638886
127.1562947956	42.3237811200	436.3217306444
127.1563074213	42.3237811200	436.2881974001
127.1563200469	42.3237811200	436.2546641559
127.1563326726	42.3237811200	436.2211309117
127.1563452982	42.3237811200	436.1875986313
127.1563579238	42.3237811200	436.1540682695
127.1563705495	42.3237811200	436.1205265072
127.1563831751	42.3237811200	436.0869781889
127.1563958007	42.3237811200	436.0534439703
127.1564084264	42.3237811200	436.0199107260
127.1564210520	42.3237811200	435.9863774818
127.1564336777	42.3237811200	435.9528442375
127.1564463033	42.3237811200	435.9193109933
127.1558150214	42.3237904132	438.3959513119
127.1558276470	42.3237904132	438.3315257349
127.1558402727	42.3237904132	438.2671159023
127.1558528983	42.3237904132	438.2026984624
127.1558655240	42.3237904132	438.1382706735
127.1558781496	42.3237904132	438.0738428845
127.1558907752	42.3237904132	438.0094150955
127.1559034009	42.3237904132	437.9449873064
127.1559160265	42.3237904132	437.8805595175
127.1559286521	42.3237904132	437.8161317285
127.1559412778	42.3237904132	437.7517039395
127.1559539034	42.3237904132	437.6872761504
127.1559665291	42.3237904132	437.6228483614
127.1559791547	42.3237904132	437.5584205725
127.1559917803	42.3237904132	437.4939927834
127.1560044060	42.3237904132	437.4295649944
127.1560170316	42.3237904132	437.3651372054
127.1560296572	42.3237904132	437.3007094165
127.1560422829	42.3237904132	437.2362816274
127.1560549085	42.3237904132	437.1718538384
127.1560675342	42.3237904132	437.1074260494
127.1560801598	42.3237904132	437.0429982604
127.1560927854	42.3237904132	436.9785704714
127.1561054111	42.3237904132	436.9144625109
127.1561180367	42.3237904132	436.8609610370
127.1561306623	42.3237904132	436.8074595631
127.1561432880	42.3237904132	436.7539580892
127.1561559136	42.3237904132	436.7004520165
127.1561685393	42.3237904132	436.6469432454
127.1561811649	42.3237904132	436.5934412656
127.1561937905	42.3237904132	436.5399373278
127.1562064162	42.3237904132	436.4864251946
127.1562190418	42.3237904132	436.4329148488
127.1562316675	42.3237904132	436.3794060777
127.1562442931	42.3237904132	436.3259033784
127.1562569187	42.3237904132	436.2724019045
127.1562695444	42.3237904132	436.2189004306
127.1562821700	42.3237904132	436.1748537576
127.1562947956	42.3237904132	436.1431869573
127.1563074213	42.3237904132	436.1115201571
127.1563200469	42.3237904132	436.0798533569
127.1563326726	42.3237904132	436.0481865567
127.1563452982	42.3237904132	436.0165233212
127.1563579238	42.3237904132	435.9848671802
127.1563705495	42.3237904132	435.9531996389
127.1563831751	42.3237904132	435.9215255415
127.1563958007	42.3237904132	435.8898582696
127.1564084264	42.3237904132	435.8581914693
127.1564210520	42.3237904132	435.8265246691
127.1564336777	42.3237904132	435.7948578690
127.1564463033	42.3237904132	435.7631910687
127.1558150214	42.3237997065	438.2062608783
127.1558276470	42.3237997065	438.1418353012
127.1558402727	42.3237997065	438.0774254687
127.1558528983	42.3237997065	438.0130080288
127.1558655240	42.3237997065	437.9485802398
127.1558781496	42.3237997065	437.8841524509
127.1558907752	42.3237997065	437.8197246618
127.1559034009	42.3237997065	437.7552968728
127.1559160265	42.3237997065	437.6908690838
127.1559286521	42.3237997065	437.6264412948
127.1559412778	42.3237997065	437.5620615090
127.1559539034	42.3237997065	437.4977104607
127.1559665291	42.3237997065	437.4333594125
127.1559791547	42.3237997065	437.3690084728
127.1559917803	42.3237997065	437.3046579042
127.1560044060	42.3237997065	437.2403070827
127.1560170316	42.3237997065	437.1759560345
127.1560296572	42.3237997065	437.1116049862
127.1560422829	42.3237997065	437.0472539379
127.1560549085	42.3237997065	436.9829028896
127.1560675342	42.3237997065	436.9185518414
127.1560801598	42.3237997065	436.8542007931
127.1560927854	42.3237997065	436.7898500943
127.1561054111	42.3237997065	436.7258364281
127.1561180367	42.3237997065	436.6729954726
127.1561306623	42.3237997065	436.6201545171
127.1561432880	42.3237997065	436.5673135615
127.1561559136	42.3237997065	436.5144726060
127.1561685393	42.3237997065	436.4616316505
127.1561811649	42.3237997065	436.4087906949
127.1561937905	42.3237997065	436.3559456997
127.1562064162	42.3237997065	436.3030872673
127.1562190418	42.3237997065	436.2502381259
127.1562316675	42.3237997065	436.1973971703
127.1562442931	42.3237997065	436.1445562148
127.1562569187	42.3237997065	436.0917152592
127.1562695444	42.3237997065	436.0388743037
127.1562821700	42.3237997065	435.9959604911
127.1562947956	42.3237997065	435.9660450239
127.1563074213	42.3237997065	435.9361295566
127.1563200469	42.3237997065	435.9062140894
127.1563326726	42.3237997065	435.8762986221
127.1563452982	42.3237997065	435.8463889995
127.1563579238	42.3237997065	435.8164910091
127.1563705495	42.3237997065	435.7865819228
127.1563831751	42.3237997065	435.7566664556
127.1563958007	42.3237997065	435.7267509883
127.1564084264	42.3237997065	435.6968355211
127.1564210520	42.3237997065	435.6669200538
127.1564336777	42.3237997065	435.6370045866
127.1564463033	42.3237997065	435.6070891193
127.1558150214	42.3238089997	438.0165704447
127.1558276470	42.3238089997	437.9521448677
127.1558402727	42.3238089997	437.8877350351
127.1558528983	42.3238089997	437.8233175953
127.1558655240	42.3238089997	437.7588898063
127.1558781496	42.3238089997	437.6944620173
127.1558907752	42.3238089997	437.6300342283
127.1559034009	42.3238089997	437.5656064393
127.1559160265	42.3238089997	437.5011786503
127.1559286521	42.3238089997	437.4367508613
127.1559412778	42.3238089997	437.3731494139
127.1559539034	42.3238089997	437.3100426616
127.1559665291	42.3238089997	437.2469359094
127.1559791547	42.3238089997	437.1838310269
127.1559917803	42.3238089997	437.1207325311
127.1560044060	42.3238089997	437.0576296847
127.1560170316	42.3238089997	436.9945229325
127.1560296572	42.3238089997	436.9314161803
127.1560422829	42.3238089997	436.8683094280
127.1560549085	42.3238089997	436.8052026757
127.1560675342	42.3238089997	436.7420959235
127.1560801598	42.3238089997	436.6789891712
127.1560927854	42.3238089997	436.6158884363
127.1561054111	42.3238089997	436.5531266153
127.1561180367	42.3238089997	436.5015299558
127.1561306623	42.3238089997	436.4499332964
127.1561432880	42.3238089997	436.3983366368
127.1561559136	42.3238089997	436.3467399773
127.1561685393	42.3238089997	436.2951433178
127.1561811649	42.3238089997	436.2435466583
127.1561937905	42.3238089997	436.1919477567
127.1562064162	42.3238089997	436.1403413971
127.1562190418	42.3238089997	436.0887401943
127.1562316675	42.3238089997	436.0371435348
127.1562442931	42.3238089997	435.9855468753
127.1562569187	42.3238089997	435.9339502157
127.1562695444	42.3238089997	435.8823535562
127.1562821700	42.3238089997	435.8401452374
127.1562947956	42.3238089997	435.8102297702
127.1563074213	42.3238089997	435.7803143029
127.1563200469	42.3238089997	435.7503988357
127.1563326726	42.3238089997	435.7204833685
127.1563452982	42.3238089997	435.6905711451
127.1563579238	42.3238089997	435.6606653778
127.1563705495	42.3238089997	435.6307534521
127.1563831751	42.3238089997	435.6008379849
127.1563958007	42.3238089997	435.5709225176
127.1564084264	42.3238089997	435.5410070504
127.1564210520	42.3238089997	435.5110915831
127.1564336777	42.3238089997	435.4811761159
127.1564463033	42.3238089997	435.4512606487
127.1558150214	42.3238182929	437.8268800111
127.1558276470	42.3238182929	437.7624544341
127.1558402727	42.3238182929	437.6980446015
127.1558528983	42.3238182929	437.6336271616
127.1558655240	42.3238182929	437.5691993726
127.1558781496	42.3238182929	437.5047715837
127.1558907752	42.3238182929	437.4403437946
127.1559034009	42.3238182929	437.3759160056
127.1559160265	42.3238182929	437.3114882166
127.1559286521	42.3238182929	437.2470604277
127.1559412778	42.3238182929	437.1842373186
127.1559539034	42.3238182929	437.1223748623
127.1559665291	42.3238182929	437.0605124061
127.1559791547	42.3238182929	436.9986535809
127.1559917803	42.3238182929	436.9368071579
127.1560044060	42.3238182929	436.8749522865
127.1560170316	42.3238182929	436.8130898303
127.1560296572	42.3238182929	436.7512273742
127.1560422829	42.3238182929	436.6893649179
127.1560549085	42.3238182929	436.6275024616
127.1560675342	42.3238182929	436.5656400054
127.1560801598	42.3238182929	436.5037775492
127.1560927854	42.3238182929	436.4419267781
127.1561054111	42.3238182929	436.3804168024
127.1561180367	42.3238182929	436.3300644389
127.1561306623	42.3238182929	436.2797120755
127.1561432880	42.3238182929	436.2293597120
127.1561559136	42.3238182929	436.1790073484
127.1561685393	42.3238182929	436.1286549850
127.1561811649	42.3238182929	436.0783026215
127.1561937905	42.3238182929	436.0279498135
127.1562064162	42.3238182929	435.9775955268
127.1562190418	42.3238182929	435.9272422626
127.1562316675	42.3238182929	435.8768898991
127.1562442931	42.3238182929	435.8265375356
127.1562569187	42.3238182929	435.7761851721
127.1562695444	42.3238182929	435.7258328087
127.1562821700	42.3238182929	435.6843299837
127.1562947956	42.3238182929	435.6544145164
127.1563074213	42.3238182929	435.6244990491
127.1563200469	42.3238182929	435.5945835819
127.1563326726	42.3238182929	435.5646681147
127.1563452982	42.3238182929	435.5347532905
127.1563579238	42.3238182929	435.5048397464
127.1563705495	42.3238182929	435.4749249813
127.1563831751	42.3238182929	435.4450095141
127.1563958007	42.3238182929	435.4150940468
127.1564084264	42.3238182929	435.3851785796
127.1564210520	42.3238182929	435.3552631123
127.1564336777	42.3238182929	435.3253476451
127.1564463033	42.3238182929	435.2954321779
127.1558150214	42.3238275861	437.6371895776
127.1558276470	42.3238275861	437.5727640005
127.1558402727	42.3238275861	437.5083541680
127.1558528983	42.3238275861	437.4439367281
127.1558655240	42.3238275861	437.3795089391
127.1558781496	42.3238275861	437.3150811502
127.1558907752	42.3238275861	437.2506533611
127.1559034009	42.3238275861	437.1862255721
127.1559160265	42.3238275861	437.1217977831
127.1559286521	42.3238275861	437.0573699941
127.1559412778	42.3238275861	436.9953288851
127.1559539034	42.3238275861	436.9347165785
127.1559665291	42.3238275861	436.8740988516
127.1559791547	42.3238275861	436.8134834322
127.1559917803	42.3238275861	436.7528773747
127.1560044060	42.3238275861	436.6922680244
127.1560170316	42.3238275861	436.6316557180
127.1560296572	42.3238275861	436.5710385682
127.1560422829	42.3238275861	436.5104204079
127.1560549085	42.3238275861	436.4498022477
127.1560675342	42.3238275861	436.3891865949
127.1560801598	42.3238275861	436.3285742884
127.1560927854	42.3238275861	436.2679665362
127.1561054111	42.3238275861	436.2076970410
127.1561180367	42.3238275861	436.1585889736
127.1561306623	42.3238275861	436.1094809061
127.1561432880	42.3238275861	436.0603728387
127.1561559136	42.3238275861	436.0112684602
127.1561685393	42.3238275861	435.9621662465
127.1561811649	42.3238275861	435.9130585849
127.1561937905	42.3238275861	435.8639505174
127.1562064162	42.3238275861	435.8148424499
127.1562190418	42.3238275861	435.7657343825
127.1562316675	42.3238275861	435.7166263150
127.1562442931	42.3238275861	435.6675182475
127.1562569187	42.3238275861	435.6184101801
127.1562695444	42.3238275861	435.5693021126
127.1562821700	42.3238275861	435.5285073162
127.1562947956	42.3238275861	435.4985977026
127.1563074213	42.3238275861	435.4686837955
127.1563200469	42.3238275861	435.4387683282
127.1563326726	42.3238275861	435.4088528610
127.1563452982	42.3238275861	435.3789373937
127.1563579238	42.3238275861	435.3490219265
127.1563705495	42.3238275861	435.3191064592
127.1563831751	42.3238275861	435.2891909920
127.1563958007	42.3238275861	435.2592755247
127.1564084264	42.3238275861	435.2293600575
127.1564210520	42.3238275861	435.1994445902
127.1564336777	42.3238275861	435.1695291230
127.1564463033	42.3238275861	435.1396136558
127.1558150214	42.3238368793	437.4474991439
127.1558276470	42.3238368793	437.3830735669
127.1558402727	42.3238368793	437.3186637343
127.1558528983	42.3238368793	437.2542462944
127.1558655240	42.3238368793	437.1898185055
127.1558781496	42.3238368793	437.1253907165
127.1558907752	42.3238368793	437.0609629275
127.1559034009	42.3238368793	436.9965351384
127.1559160265	42.3238368793	436.9321073494
127.1559286521	42.3238368793	436.8676795605
127.1559412778	42.3238368793	436.8064216544
127.1559539034	42.3238368793	436.7470614207
127.1559665291	42.3238368793	436.6876885653
127.1559791547	42.3238368793	436.6283156808
127.1559917803	42.3238368793	436.5689461425
127.1560044060	42.3238368793	436.5095815071
127.1560170316	42.3238368793	436.4502212736
127.1560296572	42.3238368793	436.3908497621
127.1560422829	42.3238368793	436.3314758979
127.1560549085	42.3238368793	436.2721020337
127.1560675342	42.3238368793	436.2127340080
127.1560801598	42.3238368793	436.1533737744
127.1560927854	42.3238368793	436.0940067595
127.1561054111	42.3238368793	436.0349740111
127.1561180367	42.3238368793	435.9871102397
127.1561306623	42.3238368793	435.9392464683
127.1561432880	42.3238368793	435.8913826968
127.1561559136	42.3238368793	435.8435275154
127.1561685393	42.3238368793	435.7956773746
127.1561811649	42.3238368793	435.7478145481
127.1561937905	42.3238368793	435.6999507766
127.1562064162	42.3238368793	435.6520870052
127.1562190418	42.3238368793	435.6042232338
127.1562316675	42.3238368793	435.5563594624
127.1562442931	42.3238368793	435.5084956909
127.1562569187	42.3238368793	435.4606319194
127.1562695444	42.3238368793	435.4127681480
127.1562821700	42.3238368793	435.3726822129
127.1562947956	42.3238368793	435.3427803762
127.1563074213	42.3238368793	435.3128685417
127.1563200469	42.3238368793	435.2829530744
127.1563326726	42.3238368793	435.2530376072
127.1563452982	42.3238368793	435.2231221399
127.1563579238	42.3238368793	435.1932066727
127.1563705495	42.3238368793	435.1632912054
127.1563831751	42.3238368793	435.1333757382
127.1563958007	42.3238368793	435.1034602710
127.1564084264	42.3238368793	435.0735448037
127.1564210520	42.3238368793	435.0436293365
127.1564336777	42.3238368793	435.0137138692
127.1564463033	42.3238368793	434.9837984020
127.1558150214	42.3238461725	437.2578115494
127.1558276470	42.3238461725	437.1933885731
127.1558402727	42.3238461725	437.1289752896
127.1558528983	42.3238461725	437.0645558608
127.1558655240	42.3238461725	437.0001280718
127.1558781496	42.3238461725	436.9357002828
127.1558907752	42.3238461725	436.8712724938
127.1559034009	42.3238461725	436.8068447048
127.1559160265	42.3238461725	436.7424169158
127.1559286521	42.3238461725	436.6779891268
127.1559412778	42.3238461725	436.6175122650
127.1559539034	42.3238461725	436.5594006533
127.1559665291	42.3238461725	436.5012724141
127.1559791547	42.3238461725	436.4431436275
127.1559917803	42.3238461725	436.3850175103
127.1560044060	42.3238461725	436.3268972180
127.1560170316	42.3238461725	436.2687821554
127.1560296572	42.3238461725	436.2106579463
127.1560422829	42.3238461725	436.1525313878
127.1560549085	42.3238461725	436.0944018196
127.1560675342	42.3238461725	436.0362799429
127.1560801598	42.3238461725	435.9781683312
127.1560927854	42.3238461725	435.9200436328
127.1561054111	42.3238461725	435.8622510821
127.1561180367	42.3238461725	435.8156350577
127.1561306623	42.3238461725	435.7690178954
127.1561432880	42.3238461725	435.7223984199
127.1561559136	42.3238461725	435.6757902608
127.1561685393	42.3238461725	435.6291887419
127.1561811649	42.3238461725	435.5825705113
127.1561937905	42.3238461725	435.5359510359
127.1562064162	42.3238461725	435.4893315605
127.1562190418	42.3238461725	435.4427139197
127.1562316675	42.3238461725	435.3960978952
127.1562442931	42.3238461725	435.3494789993
127.1562569187	42.3238461725	435.3028595238
127.1562695444	42.3238461725	435.2562400485
127.1562821700	42.3238461725	435.2168599860
127.1562947956	42.3238461725	435.1869590242
127.1563074213	42.3238461725	435.1570474229
127.1563200469	42.3238461725	435.1271319556
127.1563326726	42.3238461725	435.0972164884
127.1563452982	42.3238461725	435.0673010211
127.1563579238	42.3238461725	435.0373855539
127.1563705495	42.3238461725	435.0074700866
127.1563831751	42.3238461725	434.9775546194
127.1563958007	42.3238461725	434.9476391522
127.1564084264	42.3238461725	434.9177236849
127.1564210520	42.3238461725	434.8878082177
127.1564336777	42.3238461725	434.8578946012
127.1564463033	42.3238461725	434.8279825849
127.1558150214	42.3238554657	437.0681275140
127.1558276470	42.3238554657	437.0037103986
127.1558402727	42.3238554657	436.9392893382
127.1558528983	42.3238554657	436.8748654273
127.1558655240	42.3238554657	436.8104376383
127.1558781496	42.3238554657	436.7460098493
127.1558907752	42.3238554657	436.6815820603
127.1559034009	42.3238554657	436.6171542712
127.1559160265	42.3238554657	436.5527264823
127.1559286521	42.3238554657	436.4882986933
127.1559412778	42.3238554657	436.4286001699
127.1559539034	42.3238554657	436.3717328542
127.1559665291	42.3238554657	436.3148489110
127.1559791547	42.3238554657	436.2579661816
127.1559917803	42.3238554657	436.2010921372
127.1560044060	42.3238554657	436.1442157221
127.1560170316	42.3238554657	436.0873371787
127.1560296572	42.3238554657	436.0304623578
127.1560422829	42.3238554657	435.9735868778
127.1560549085	42.3238554657	435.9167016057
127.1560675342	42.3238554657	435.8598240250
127.1560801598	42.3238554657	435.8029567094
127.1560927854	42.3238554657	435.7460763069
127.1561054111	42.3238554657	435.6895282800
127.1561180367	42.3238554657	435.6441643284
127.1561306623	42.3238554657	435.5987966746
127.1561432880	42.3238554657	435.5534214952
127.1561559136	42.3238554657	435.5080576321
127.1561685393	42.3238554657	435.4627004092
127.1561811649	42.3238554657	435.4173264747
127.1561937905	42.3238554657	435.3719512953
127.1562064162	42.3238554657	435.3265761159
127.1562190418	42.3238554657	435.2812069054
127.1562316675	42.3238554657	435.2358429538
127.1562442931	42.3238554657	435.1904696598
127.1562569187	42.3238554657	435.1450944804
127.1562695444	42.3238554657	435.0997193010
127.1562821700	42.3238554657	435.0610413648
127.1562947956	42.3238554657	435.0311326262
127.1563074213	42.3238554657	435.0012189522
127.1563200469	42.3238554657	434.9713034850
127.1563326726	42.3238554657	434.9413880177
127.1563452982	42.3238554657	434.9114725505
127.1563579238	42.3238554657	434.8815570832
127.1563705495	42.3238554657	434.8516416160
127.1563831751	42.3238554657	434.8217261487
127.1563958007	42.3238554657	434.7918106815
127.1564084264	42.3238554657	434.7618952142
127.1564210520	42.3238554657	434.7319797470
127.1564336777	42.3238554657	434.7020703012
127.1564463033	42.3238554657	434.6721660617
127.1558150214	42.3238647589	436.8784426161
127.1558276470	42.3238647589	436.8140305717
127.1558402727	42.3238647589	436.7496027826
127.1558528983	42.3238647589	436.6851749936
127.1558655240	42.3238647589	436.6207472046
127.1558781496	42.3238647589	436.5563194157
127.1558907752	42.3238647589	436.4918916266
127.1559034009	42.3238647589	436.4274638376
127.1559160265	42.3238647589	436.3630360486
127.1559286521	42.3238647589	436.2986082596
127.1559412778	42.3238647589	436.2396880745
127.1559539034	42.3238647589	436.1840650549
127.1559665291	42.3238647589	436.1284263783
127.1559791547	42.3238647589	436.0727902795
127.1559917803	42.3238647589	436.0171672599
127.1560044060	42.3238647589	435.9615347784
127.1560170316	42.3238647589	435.9058938024
127.1560296572	42.3238647589	435.8502676835
127.1560422829	42.3238647589	435.7946425018
127.1560549085	42.3238647589	435.7390025739
127.1560675342	42.3238647589	435.6833694394
127.1560801598	42.3238647589	435.6277453716
127.1560927854	42.3238647589	435.5721097449
127.1561054111	42.3238647589	435.5168072284
127.1561180367	42.3238647589	435.4726943016
127.1561306623	42.3238647589	435.4285754537
127.1561432880	42.3238647589	435.3844445704
127.1561559136	42.3238647589	435.3403243427
127.1561685393	42.3238647589	435.2962103677
127.1561811649	42.3238647589	435.2520816320
127.1561937905	42.3238647589	435.2079517968
127.1562064162	42.3238647589	435.1638219616
127.1562190418	42.3238647589	435.1197005579
127.1562316675	42.3238647589	435.0755865829
127.1562442931	42.3238647589	435.0314585387
127.1562569187	42.3238647589	434.9873277943
127.1562695444	42.3238647589	434.9431979591
127.1562821700	42.3238647589	434.9052231974
127.1562947956	42.3238647589	434.8753077301
127.1563074213	42.3238647589	434.8453922628
127.1563200469	42.3238647589	434.8154767956
127.1563326726	42.3238647589	434.7855613284
127.1563452982	42.3238647589	434.7556458611
127.1563579238	42.3238647589	434.7257303938
127.1563705495	42.3238647589	434.6958149266
127.1563831751	42.3238647589	434.6658994594
127.1563958007	42.3238647589	434.6359839921
127.1564084264	42.3238647589	434.6060685248
127.1564210520	42.3238647589	434.5761530576
127.1564336777	42.3238647589	434.5462466582
127.1564463033	42.3238647589	434.5163480992
127.1558150214	42.3238740521	436.6887521825
127.1558276470	42.3238740521	436.6243401380
127.1558402727	42.3238740521	436.5599123490
127.1558528983	42.3238740521	436.4954845599
127.1558655240	42.3238740521	436.4310567710
127.1558781496	42.3238740521	436.3666289820
127.1558907752	42.3238740521	436.3022011930
127.1559034009	42.3238740521	436.2377734039
127.1559160265	42.3238740521	436.1733456149
127.1559286521	42.3238740521	436.1089178260
127.1559412778	42.3238740521	436.0507759792
127.1559539034	42.3238740521	435.9963972556
127.1559665291	42.3238740521	435.9420100764
127.1559791547	42.3238740521	435.8876242893
127.1559917803	42.3238740521	435.8332455657
127.1560044060	42.3238740521	435.7788573803
127.1560170316	42.3238740521	435.7244607002
127.1560296572	42.3238740521	435.6700788773
127.1560422829	42.3238740521	435.6156989861
127.1560549085	42.3238740521	435.5613111311
127.1560675342	42.3238740521	435.5069234073
127.1560801598	42.3238740521	435.4525358587
127.1560927854	42.3238740521	435.3981480867
127.1561054111	42.3238740521	435.3440974155
127.1561180367	42.3238740521	435.3012287846
127.1561306623	42.3238740521	435.2583542329
127.1561432880	42.3238740521	435.2154676455
127.1561559136	42.3238740521	435.1725868129
127.1561685393	42.3238740521	435.1297093570
127.1561811649	42.3238740521	435.0868316160
127.1561937905	42.3238740521	435.0439538536
127.1562064162	42.3238740521	435.0010760913
127.1562190418	42.3238740521	434.9581984920
127.1562316675	42.3238740521	434.9153210361
127.1562442931	42.3238740521	434.8724359821
127.1562569187	42.3238740521	434.8295505645
127.1562695444	42.3238740521	434.7866728022
127.1562821700	42.3238740521	434.7494079436
127.1562947956	42.3238740521	434.7194924763
127.1563074213	42.3238740521	434.6895770090
127.1563200469	42.3238740521	434.6596615418
127.1563326726	42.3238740521	434.6297460746
127.1563452982	42.3238740521	434.5998306073
127.1563579238	42.3238740521	434.5699151400
127.1563705495	42.3238740521	434.5399996728
127.1563831751	42.3238740521	434.5100842056
127.1563958007	42.3238740521	434.4801687383
127.1564084264	42.3238740521	434.4502532711
127.1564210520	42.3238740521	434.4203378038
127.1564336777	42.3238740521	434.3904272337
127.1564463033	42.3238740521	434.3605208979
127.1558150214	42.3238833453	436.4990617489
127.1558276470	42.3238833453	436.4346497045
127.1558402727	42.3238833453	436.3702219155
127.1558528983	42.3238833453	436.3057941264
127.1558655240	42.3238833453	436.2413663374
127.1558781496	42.3238833453	436.1769385485
127.1558907752	42.3238833453	436.1125107594
127.1559034009	42.3238833453	436.0480829704
127.1559160265	42.3238833453	435.9836551814
127.1559286521	42.3238833453	435.9192273925
127.1559412778	42.3238833453	435.8618638841
127.1559539034	42.3238833453	435.8087294565
127.1559665291	42.3238833453	435.7555937746
127.1559791547	42.3238833453	435.7024582992
127.1559917803	42.3238833453	435.6493238716
127.1560044060	42.3238833453	435.5961799822
127.1560170316	42.3238833453	435.5430275982
127.1560296572	42.3238833453	435.4898900714
127.1560422829	42.3238833453	435.4367554706
127.1560549085	42.3238833453	435.3836196884
127.1560675342	42.3238833453	435.3304773753
127.1560801598	42.3238833453	435.2773263459
127.1560927854	42.3238833453	435.2241864287
127.1561054111	42.3238833453	435.1713876027
127.1561180367	42.3238833453	435.1297632679
127.1561306623	42.3238833453	435.0881330121
127.1561432880	42.3238833453	435.0464907208
127.1561559136	42.3238833453	435.0048492831
127.1561685393	42.3238833453	434.9632083464
127.1561811649	42.3238833453	434.9215816000
127.1561937905	42.3238833453	434.8799559106
127.1562064162	42.3238833453	434.8383302212
127.1562190418	42.3238833453	434.7966964261
127.1562316675	42.3238833453	434.7550554894
127.1562442931	42.3238833453	434.7134134256
127.1562569187	42.3238833453	434.6717733348
127.1562695444	42.3238833453	434.6301476454
127.1562821700	42.3238833453	434.5935926899
127.1562947956	42.3238833453	434.5636772226
127.1563074213	42.3238833453	434.5337617554
127.1563200469	42.3238833453	434.5038462881
127.1563326726	42.3238833453	434.4739308209
127.1563452982	42.3238833453	434.4440153536
127.1563579238	42.3238833453	434.4140998864
127.1563705495	42.3238833453	434.3841844191
127.1563831751	42.3238833453	434.3542689519
127.1563958007	42.3238833453	434.3243534846
127.1564084264	42.3238833453	434.2944380174
127.1564210520	42.3238833453	434.2645225502
127.1564336777	42.3238833453	434.2346078094
127.1564463033	42.3238833453	434.2046936967
127.1558150214	42.3238926385	436.3093713153
127.1558276470	42.3238926385	436.2449592708
127.1558402727	42.3238926385	436.1805314818
127.1558528983	42.3238926385	436.1161036928
127.1558655240	42.3238926385	436.0516759038
127.1558781496	42.3238926385	435.9872481148
127.1558907752	42.3238926385	435.9228203258
127.1559034009	42.3238926385	435.8583925367
127.1559160265	42.3238926385	435.7939668354
127.1559286521	42.3238926385	435.7295454687
127.1559412778	42.3238926385	435.6729586863
127.1559539034	42.3238926385	435.6210621325
127.1559665291	42.3238926385	435.5691715257
127.1559791547	42.3238926385	435.5172813942
127.1559917803	42.3238926385	435.4653912626
127.1560044060	42.3238926385	435.4134950533
127.1560170316	42.3238926385	435.3615933876
127.1560296572	42.3238926385	435.3097012653
127.1560422829	42.3238926385	435.2578111337
127.1560549085	42.3238926385	435.2059210021
127.1560675342	42.3238926385	435.1540259301
127.1560801598	42.3238926385	435.1021242644
127.1560927854	42.3238926385	435.0502310048
127.1561054111	42.3238926385	434.9986776018
127.1561180367	42.3238926385	434.9582911407
127.1561306623	42.3238926385	434.9179029940
127.1561432880	42.3238926385	434.8775114210
127.1561559136	42.3238926385	434.8371158006
127.1561685393	42.3238926385	434.7967178054
127.1561811649	42.3238926385	434.7563365218
127.1561937905	42.3238926385	434.7159564830
127.1562064162	42.3238926385	434.6755764441
127.1562190418	42.3238926385	434.6351868595
127.1562316675	42.3238926385	434.5947888642
127.1562442931	42.3238926385	434.5543962128
127.1562569187	42.3238926385	434.5140061686
127.1562695444	42.3238926385	434.4736261298
127.1562821700	42.3238926385	434.4377774361
127.1562947956	42.3238926385	434.4078619688
127.1563074213	42.3238926385	434.3779465016
127.1563200469	42.3238926385	434.3480310343
127.1563326726	42.3238926385	434.3181155671
127.1563452982	42.3238926385	434.2882000998
127.1563579238	42.3238926385	434.2582846326
127.1563705495	42.3238926385	434.2283691653
127.1563831751	42.3238926385	434.1984536981
127.1563958007	42.3238926385	434.1685382309
127.1564084264	42.3238926385	434.1386227636
127.1564210520	42.3238926385	434.1087072964
127.1564336777	42.3238926385	434.0787883849
127.1564463033	42.3238926385	434.0488664953
127.1558150214	42.3239019317	436.1196808816
127.1558276470	42.3239019317	436.0552688372
127.1558402727	42.3239019317	435.9908410481
127.1558528983	42.3239019317	435.9264132591
127.1558655240	42.3239019317	435.8619854701
127.1558781496	42.3239019317	435.7975576812
127.1558907752	42.3239019317	435.7331298921
127.1559034009	42.3239019317	435.6687021031
127.1559160265	42.3239019317	435.6042789296
127.1559286521	42.3239019317	435.5398653398
127.1559412778	42.3239019317	435.4840549434
127.1559539034	42.3239019317	435.4333949087
127.1559665291	42.3239019317	435.3827480224
127.1559791547	42.3239019317	435.3321021869
127.1559917803	42.3239019317	435.2814563514
127.1560044060	42.3239019317	435.2308085360
127.1560170316	42.3239019317	435.1801589432
127.1560296572	42.3239019317	435.1295124592
127.1560422829	42.3239019317	435.0788666236
127.1560549085	42.3239019317	435.0282207881
127.1560675342	42.3239019317	434.9775733432
127.1560801598	42.3239019317	434.9269237503
127.1560927854	42.3239019317	434.8762768958
127.1561054111	42.3239019317	434.8259675612
127.1561180367	42.3239019317	434.7868176193
127.1561306623	42.3239019317	434.7476711205
127.1561432880	42.3239019317	434.7085316203
127.1561559136	42.3239019317	434.6693831718
127.1561685393	42.3239019317	434.6302294726
127.1561811649	42.3239019317	434.5910924850
127.1561937905	42.3239019317	434.5519567422
127.1562064162	42.3239019317	434.5128209994
127.1562190418	42.3239019317	434.4736757108
127.1562316675	42.3239019317	434.4345220116
127.1562442931	42.3239019317	434.3953801271
127.1562569187	42.3239019317	434.3562411250
127.1562695444	42.3239019317	434.3171053823
127.1562821700	42.3239019317	434.2819621823
127.1562947956	42.3239019317	434.2520467150
127.1563074213	42.3239019317	434.2221312478
127.1563200469	42.3239019317	434.1922157805
127.1563326726	42.3239019317	434.1623003133
127.1563452982	42.3239019317	434.1323848460
127.1563579238	42.3239019317	434.1024693788
127.1563705495	42.3239019317	434.0725539116
127.1563831751	42.3239019317	434.0426384443
127.1563958007	42.3239019317	434.0127229771
127.1564084264	42.3239019317	433.9828075098
127.1564210520	42.3239019317	433.9528920426
127.1564336777	42.3239019317	433.9229689604
127.1564463033	42.3239019317	433.8930392940
127.1558150214	42.3239112249	435.9299904481
127.1558276470	42.3239112249	435.8655784037
127.1558402727	42.3239112249	435.8011506146
127.1558528983	42.3239112249	435.7367228256
127.1558655240	42.3239112249	435.6722950366
127.1558781496	42.3239112249	435.6078672476
127.1558907752	42.3239112249	435.5434395574
127.1559034009	42.3239112249	435.4790157879
127.1559160265	42.3239112249	435.4145952422
127.1559286521	42.3239112249	435.3501813902
[truncated: 806 more rows]
