# Supplementary material for: Simulation Study on Coverage Path Planning of Autonomous Tasks in Hilly Farmland Based on Energy Consumption Model
Source: Hindawi journal article supplement (doi:10.1155/2020/4535734), 2020-08-30
Supplement: f1 [file 4535734.f1.zip › 4535734.f1/Algorithm-pathplanning-matlab/2020.04.25/0101/2.csv]

Longitude	Latitude	Elevation
127.1558150214	42.3236403123	0.0000000000
127.1561831702	42.3235487899	0.0000000000
127.1562950165	42.3236313648	0.0000000000
127.1563762716	42.3236600527	0.0000000000
127.1564463033	42.3237905958	0.0000000000
127.1563650472	42.3238498989	0.0000000000
127.1562647307	42.3239790716	0.0000000000
127.1561319942	42.3240506230	0.0000000000
127.1560816932	42.3239902133	0.0000000000
127.1560289653	42.3238862893	0.0000000000
127.1559483904	42.3238210171	0.0000000000
127.1559030728	42.3237279749	0.0000000000
127.1558150214	42.3236403123	0.0000000000
