# Supplementary material for: Simulation Study on Coverage Path Planning of Autonomous Tasks in Hilly Farmland Based on Energy Consumption Model
Source: Hindawi journal article supplement (doi:10.1155/2020/4535734), 2020-08-30
Supplement: f1 [file 4535734.f1.zip › 4535734.f1/Algorithm-pathplanning-matlab/2020.04.25/0202/1.csv]

Longitude	Latitude	Elevation
127.1563852687	42.3232145255	447.3155444103
127.1563976012	42.3232145255	447.2380254550
127.1564099337	42.3232145255	447.1605064998
127.1564222663	42.3232145255	447.0829875447
127.1564345988	42.3232145255	447.0054685895
127.1564469313	42.3232145255	446.9279496342
127.1564592638	42.3232145255	446.8633227054
127.1564715964	42.3232145255	446.8003906656
127.1564839289	42.3232145255	446.7374586260
127.1564962614	42.3232145255	446.6745265863
127.1565085939	42.3232145255	446.6115945465
127.1565209264	42.3232145255	446.5486625068
127.1565332590	42.3232145255	446.4857304671
127.1565455915	42.3232145255	446.4227976623
127.1565579240	42.3232145255	446.3598647946
127.1565702565	42.3232145255	446.2969319269
127.1565825891	42.3232145255	446.2339990592
127.1565949216	42.3232145255	446.1710661915
127.1566072541	42.3232145255	446.1081333239
127.1566195866	42.3232145255	446.0452004562
127.1566319191	42.3232145255	445.9822691855
127.1566442517	42.3232145255	445.9193379737
127.1566565842	42.3232145255	445.8564067620
127.1566689167	42.3232145255	445.7934755503
127.1566812492	42.3232145255	445.7305443386
127.1566935818	42.3232145255	445.6676131268
127.1567059143	42.3232145255	445.6046819151
127.1567182468	42.3232145255	445.5417507033
127.1567305793	42.3232145255	445.4788194917
127.1567429119	42.3232145255	445.4158882799
127.1567552444	42.3232145255	445.3529570682
127.1567675769	42.3232145255	445.2900258564
127.1567799094	42.3232145255	445.2270946447
127.1567922419	42.3232145255	445.1644640701
127.1568045745	42.3232145255	445.1082141107
127.1568169070	42.3232145255	445.0519641513
127.1568292395	42.3232145255	444.9957141919
127.1568415720	42.3232145255	444.9394642325
127.1568539046	42.3232145255	444.8832142732
127.1568662371	42.3232145255	444.8269643138
127.1568785696	42.3232145255	444.7707139803
127.1568909021	42.3232145255	444.7144596360
127.1569032346	42.3232145255	444.6582052917
127.1569155672	42.3232145255	444.6019509475
127.1569278997	42.3232145255	444.5456966032
127.1569402322	42.3232145255	444.4894422589
127.1569525647	42.3232145255	444.4331879146
127.1569648973	42.3232145255	444.3786121045
127.1569772298	42.3232145255	444.3357227489
127.1569895623	42.3232145255	444.2928333932
127.1570018948	42.3232145255	444.2499440375
127.1570142273	42.3232145255	444.2070546818
127.1570265599	42.3232145255	444.1641653262
127.1570388924	42.3232145255	444.1212759705
127.1570512249	42.3232145255	444.0783860248
127.1570635574	42.3232145255	444.0354931122
127.1570758900	42.3232145255	443.9926001996
127.1570882225	42.3232145255	443.9497072870
127.1571005550	42.3232145255	443.9068143745
127.1571128875	42.3232145255	443.8639214619
127.1571252200	42.3232145255	443.8210285493
127.1571375526	42.3232145255	443.7809553459
127.1571498851	42.3232145255	443.7517379501
127.1571622176	42.3232145255	443.7225205544
127.1571745501	42.3232145255	443.6933031587
127.1571868827	42.3232145255	443.6640857629
127.1571992152	42.3232145255	443.6348683672
127.1572115477	42.3232145255	443.6056509714
127.1572238802	42.3232145255	443.5764335757
127.1572362127	42.3232145255	443.5472161799
127.1572485453	42.3232145255	443.5179987842
127.1572608778	42.3232145255	443.4887813884
127.1572732103	42.3232145255	443.4595639927
127.1572855428	42.3232145255	443.4303465969
127.1572978754	42.3232145255	443.4011292012
127.1573102079	42.3232145255	443.3719107854
127.1573225404	42.3232145255	443.3426898327
127.1573348729	42.3232145255	443.3134688801
127.1573472054	42.3232145255	443.2842479274
127.1573595380	42.3232145255	443.2550269747
127.1573718705	42.3232145255	443.2258060221
127.1573842030	42.3232145255	443.1965850694
127.1573965355	42.3232145255	443.1673643876
127.1574088681	42.3232145255	443.1381442629
127.1574212006	42.3232145255	443.1089241382
127.1574335331	42.3232145255	443.0797040135
127.1574458656	42.3232145255	443.0504838888
127.1574581982	42.3232145255	443.0212637641
127.1574705307	42.3232145255	442.9920436394
127.1574828632	42.3232145255	442.9628235148
127.1574951957	42.3232145255	442.9336033901
127.1575075282	42.3232145255	442.9043832654
127.1575198608	42.3232145255	442.8751631407
127.1575321933	42.3232145255	442.8459430160
127.1575445258	42.3232145255	442.8167228914
127.1575568583	42.3232145255	442.7875027667
127.1575691909	42.3232145255	442.7582823045
127.1575815234	42.3232145255	442.7290613518
127.1575938559	42.3232145255	442.6998403991
127.1576061884	42.3232145255	442.6706194465
127.1576185209	42.3232145255	442.6413984938
127.1576308535	42.3232145255	442.6121775411
127.1576431860	42.3232145255	442.5829565885
127.1576555185	42.3232145255	442.5537372292
127.1576678510	42.3232145255	442.5245198335
127.1576801836	42.3232145255	442.4953024377
127.1576925161	42.3232145255	442.4660850420
127.1577048486	42.3232145255	442.4368676462
127.1577171811	42.3232145255	442.4076502505
127.1577295136	42.3232145255	442.3784328547
127.1577418462	42.3232145255	442.3492158633
127.1577541787	42.3232145255	442.3199992955
127.1577665112	42.3232145255	442.2907827277
127.1577788437	42.3232145255	442.2615661599
127.1577911763	42.3232145255	442.2323495922
127.1578035088	42.3232145255	442.2031330244
127.1578158413	42.3232145255	442.1739164567
127.1563852687	42.3232236641	447.1192146175
127.1563976012	42.3232236641	447.0436102932
127.1564099337	42.3232236641	446.9680059690
127.1564222663	42.3232236641	446.8924016448
127.1564345988	42.3232236641	446.8167973205
127.1564469313	42.3232236641	446.7411929962
127.1564592638	42.3232236641	446.6767885330
127.1564715964	42.3232236641	446.6138564933
127.1564839289	42.3232236641	446.5509244536
127.1564962614	42.3232236641	446.4879924139
127.1565085939	42.3232236641	446.4250603742
127.1565209264	42.3232236641	446.3621283344
127.1565332590	42.3232236641	446.2991962947
127.1565455915	42.3232236641	446.2362630585
127.1565579240	42.3232236641	446.1733297239
127.1565702565	42.3232236641	446.1103963893
127.1565825891	42.3232236641	446.0474630548
127.1565949216	42.3232236641	445.9845297202
127.1566072541	42.3232236641	445.9215963857
127.1566195866	42.3232236641	445.8586630511
127.1566319191	42.3232236641	445.7957322141
127.1566442517	42.3232236641	445.7328014692
127.1566565842	42.3232236641	445.6698707243
127.1566689167	42.3232236641	445.6069399795
127.1566812492	42.3232236641	445.5440092346
127.1566935818	42.3232236641	445.4810784898
127.1567059143	42.3232236641	445.4181477449
127.1567182468	42.3232236641	445.3552170000
127.1567305793	42.3232236641	445.2922862552
127.1567429119	42.3232236641	445.2293555103
127.1567552444	42.3232236641	445.1664247655
127.1567675769	42.3232236641	445.1034940206
127.1567799094	42.3232236641	445.0405632757
127.1567922419	42.3232236641	444.9779600579
127.1568045745	42.3232236641	444.9223081581
127.1568169070	42.3232236641	444.8666562582
127.1568292395	42.3232236641	444.8110043584
127.1568415720	42.3232236641	444.7553524586
127.1568539046	42.3232236641	444.6997005588
127.1568662371	42.3232236641	444.6440486589
127.1568785696	42.3232236641	444.5883963851
127.1568909021	42.3232236641	444.5327401003
127.1569032346	42.3232236641	444.4770838156
127.1569155672	42.3232236641	444.4214275309
127.1569278997	42.3232236641	444.3657712462
127.1569402322	42.3232236641	444.3101149614
127.1569525647	42.3232236641	444.2544586767
127.1569648973	42.3232236641	444.2006312076
127.1569772298	42.3232236641	444.1595364975
127.1569895623	42.3232236641	444.1184417874
127.1570018948	42.3232236641	444.0773470773
127.1570142273	42.3232236641	444.0362523671
127.1570265599	42.3232236641	443.9951576570
127.1570388924	42.3232236641	443.9540629469
127.1570512249	42.3232236641	443.9129677242
127.1570635574	42.3232236641	443.8718699240
127.1570758900	42.3232236641	443.8307721238
127.1570882225	42.3232236641	443.7896743236
127.1571005550	42.3232236641	443.7485765235
127.1571128875	42.3232236641	443.7074787233
127.1571252200	42.3232236641	443.6663809231
127.1571375526	42.3232236641	443.6277326076
127.1571498851	42.3232236641	443.5985147450
127.1571622176	42.3232236641	443.5692968824
127.1571745501	42.3232236641	443.5400790198
127.1571868827	42.3232236641	443.5108611572
127.1571992152	42.3232236641	443.4816432945
127.1572115477	42.3232236641	443.4524254319
127.1572238802	42.3232236641	443.4232075693
127.1572362127	42.3232236641	443.3939897067
127.1572485453	42.3232236641	443.3647718441
127.1572608778	42.3232236641	443.3355539815
127.1572732103	42.3232236641	443.3063361188
127.1572855428	42.3232236641	443.2771182562
127.1572978754	42.3232236641	443.2479003936
127.1573102079	42.3232236641	443.2186816448
127.1573225404	42.3232236641	443.1894606922
127.1573348729	42.3232236641	443.1602397395
127.1573472054	42.3232236641	443.1310187868
127.1573595380	42.3232236641	443.1017978342
127.1573718705	42.3232236641	443.0725768815
127.1573842030	42.3232236641	443.0433559288
127.1573965355	42.3232236641	443.0141353997
127.1574088681	42.3232236641	442.9849157419
127.1574212006	42.3232236641	442.9556960841
127.1574335331	42.3232236641	442.9264764263
127.1574458656	42.3232236641	442.8972567684
127.1574581982	42.3232236641	442.8680371106
127.1574705307	42.3232236641	442.8388174528
127.1574828632	42.3232236641	442.8095977950
127.1574951957	42.3232236641	442.7803781372
127.1575075282	42.3232236641	442.7511584794
127.1575198608	42.3232236641	442.7219388216
127.1575321933	42.3232236641	442.6927191637
127.1575445258	42.3232236641	442.6634995059
127.1575568583	42.3232236641	442.6342798481
127.1575691909	42.3232236641	442.6050596624
127.1575815234	42.3232236641	442.5758387098
127.1575938559	42.3232236641	442.5466177571
127.1576061884	42.3232236641	442.5173968045
127.1576185209	42.3232236641	442.4881758518
127.1576308535	42.3232236641	442.4589548991
127.1576431860	42.3232236641	442.4297339464
127.1576555185	42.3232236641	442.4005143780
127.1576678510	42.3232236641	442.3712965154
127.1576801836	42.3232236641	442.3420786528
127.1576925161	42.3232236641	442.3128607902
127.1577048486	42.3232236641	442.2836429276
127.1577171811	42.3232236641	442.2544250649
127.1577295136	42.3232236641	442.2252072024
127.1577418462	42.3232236641	442.1959899720
127.1577541787	42.3232236641	442.1667734042
127.1577665112	42.3232236641	442.1375568364
127.1577788437	42.3232236641	442.1083402687
127.1577911763	42.3232236641	442.0791237009
127.1578035088	42.3232236641	442.0499071331
127.1578158413	42.3232236641	442.0206905654
127.1563852687	42.3232328027	446.9228848248
127.1563976012	42.3232328027	446.8491951315
127.1564099337	42.3232328027	446.7755054381
127.1564222663	42.3232328027	446.7018157449
127.1564345988	42.3232328027	446.6281260516
127.1564469313	42.3232328027	446.5544363582
127.1564592638	42.3232328027	446.4902543606
127.1564715964	42.3232328027	446.4273223209
127.1564839289	42.3232328027	446.3643902812
127.1564962614	42.3232328027	446.3014582415
127.1565085939	42.3232328027	446.2385262018
127.1565209264	42.3232328027	446.1755941620
127.1565332590	42.3232328027	446.1126621223
127.1565455915	42.3232328027	446.0497284547
127.1565579240	42.3232328027	445.9867946532
127.1565702565	42.3232328027	445.9238608518
127.1565825891	42.3232328027	445.8609270503
127.1565949216	42.3232328027	445.7979932489
127.1566072541	42.3232328027	445.7350594475
127.1566195866	42.3232328027	445.6721256461
127.1566319191	42.3232328027	445.6091952426
127.1566442517	42.3232328027	445.5462649646
127.1566565842	42.3232328027	445.4833346866
127.1566689167	42.3232328027	445.4204044087
127.1566812492	42.3232328027	445.3574741307
127.1566935818	42.3232328027	445.2945438527
127.1567059143	42.3232328027	445.2316135747
127.1567182468	42.3232328027	445.1686832967
127.1567305793	42.3232328027	445.1057530188
127.1567429119	42.3232328027	445.0428227407
127.1567552444	42.3232328027	444.9798924627
127.1567675769	42.3232328027	444.9169621847
127.1567799094	42.3232328027	444.8540319067
127.1567922419	42.3232328027	444.7914560458
127.1568045745	42.3232328027	444.7364022055
127.1568169070	42.3232328027	444.6813483652
127.1568292395	42.3232328027	444.6262945249
127.1568415720	42.3232328027	444.5712406846
127.1568539046	42.3232328027	444.5161868444
127.1568662371	42.3232328027	444.4611330041
127.1568785696	42.3232328027	444.4060787898
127.1568909021	42.3232328027	444.3510205646
127.1569032346	42.3232328027	444.2959623394
127.1569155672	42.3232328027	444.2409041143
127.1569278997	42.3232328027	444.1858458891
127.1569402322	42.3232328027	444.1307876640
127.1569525647	42.3232328027	444.0757294388
127.1569648973	42.3232328027	444.0226503107
127.1569772298	42.3232328027	443.9833502462
127.1569895623	42.3232328027	443.9440501816
127.1570018948	42.3232328027	443.9047501170
127.1570142273	42.3232328027	443.8654500524
127.1570265599	42.3232328027	443.8261499878
127.1570388924	42.3232328027	443.7868499233
127.1570512249	42.3232328027	443.7475494235
127.1570635574	42.3232328027	443.7082467358
127.1570758900	42.3232328027	443.6689440480
127.1570882225	42.3232328027	443.6296413602
127.1571005550	42.3232328027	443.5903386725
127.1571128875	42.3232328027	443.5510359847
127.1571252200	42.3232328027	443.5117332969
127.1571375526	42.3232328027	443.4745098693
127.1571498851	42.3232328027	443.4452915398
127.1571622176	42.3232328027	443.4160732103
127.1571745501	42.3232328027	443.3868548809
127.1571868827	42.3232328027	443.3576365514
127.1571992152	42.3232328027	443.3284182219
127.1572115477	42.3232328027	443.2991998924
127.1572238802	42.3232328027	443.2699815629
127.1572362127	42.3232328027	443.2407632335
127.1572485453	42.3232328027	443.2115449040
127.1572608778	42.3232328027	443.1823265745
127.1572732103	42.3232328027	443.1531082450
127.1572855428	42.3232328027	443.1238899155
127.1572978754	42.3232328027	443.0946715860
127.1573102079	42.3232328027	443.0654525043
127.1573225404	42.3232328027	443.0362315516
127.1573348729	42.3232328027	443.0070105989
127.1573472054	42.3232328027	442.9777896463
127.1573595380	42.3232328027	442.9485686936
127.1573718705	42.3232328027	442.9193477410
127.1573842030	42.3232328027	442.8901267883
127.1573965355	42.3232328027	442.8609064118
127.1574088681	42.3232328027	442.8316872209
127.1574212006	42.3232328027	442.8024680300
127.1574335331	42.3232328027	442.7732488390
127.1574458656	42.3232328027	442.7440296481
127.1574581982	42.3232328027	442.7148104571
127.1574705307	42.3232328027	442.6855912662
127.1574828632	42.3232328027	442.6563720752
127.1574951957	42.3232328027	442.6271528843
127.1575075282	42.3232328027	442.5979336933
127.1575198608	42.3232328027	442.5687145024
127.1575321933	42.3232328027	442.5394953114
127.1575445258	42.3232328027	442.5102761205
127.1575568583	42.3232328027	442.4810569296
127.1575691909	42.3232328027	442.4518370204
127.1575815234	42.3232328027	442.4226160677
127.1575938559	42.3232328027	442.3933951151
127.1576061884	42.3232328027	442.3641741624
127.1576185209	42.3232328027	442.3349532098
127.1576308535	42.3232328027	442.3057322571
127.1576431860	42.3232328027	442.2765113044
127.1576555185	42.3232328027	442.2472915269
127.1576678510	42.3232328027	442.2180731974
127.1576801836	42.3232328027	442.1888548679
127.1576925161	42.3232328027	442.1596365384
127.1577048486	42.3232328027	442.1304182089
127.1577171811	42.3232328027	442.1011998794
127.1577295136	42.3232328027	442.0719815500
127.1577418462	42.3232328027	442.0427640807
127.1577541787	42.3232328027	442.0135475129
127.1577665112	42.3232328027	441.9843309451
127.1577788437	42.3232328027	441.9551143774
127.1577911763	42.3232328027	441.9258978096
127.1578035088	42.3232328027	441.8966812418
127.1578158413	42.3232328027	441.8674646741
127.1563852687	42.3232419412	446.7265550320
127.1563976012	42.3232419412	446.6547799697
127.1564099337	42.3232419412	446.5830049073
127.1564222663	42.3232419412	446.5112298450
127.1564345988	42.3232419412	446.4394547826
127.1564469313	42.3232419412	446.3676797202
127.1564592638	42.3232419412	446.3037201882
127.1564715964	42.3232419412	446.2407881485
127.1564839289	42.3232419412	446.1778561088
127.1564962614	42.3232419412	446.1149240691
127.1565085939	42.3232419412	446.0519920294
127.1565209264	42.3232419412	445.9890599897
127.1565332590	42.3232419412	445.9261279499
127.1565455915	42.3232419412	445.8631938508
127.1565579240	42.3232419412	445.8002595825
127.1565702565	42.3232419412	445.7373253142
127.1565825891	42.3232419412	445.6743910459
127.1565949216	42.3232419412	445.6114567776
127.1566072541	42.3232419412	445.5485225094
127.1566195866	42.3232419412	445.4855882410
127.1566319191	42.3232419412	445.4226582712
127.1566442517	42.3232419412	445.3597284601
127.1566565842	42.3232419412	445.2967986490
127.1566689167	42.3232419412	445.2338688379
127.1566812492	42.3232419412	445.1709390268
127.1566935818	42.3232419412	445.1080092156
127.1567059143	42.3232419412	445.0450794045
127.1567182468	42.3232419412	444.9821495934
127.1567305793	42.3232419412	444.9192197823
127.1567429119	42.3232419412	444.8562899712
127.1567552444	42.3232419412	444.7933601600
127.1567675769	42.3232419412	444.7304303489
127.1567799094	42.3232419412	444.6675005378
127.1567922419	42.3232419412	444.6049520336
127.1568045745	42.3232419412	444.5504962529
127.1568169070	42.3232419412	444.4960404722
127.1568292395	42.3232419412	444.4415846914
127.1568415720	42.3232419412	444.3871289107
127.1568539046	42.3232419412	444.3326731300
127.1568662371	42.3232419412	444.2782173493
127.1568785696	42.3232419412	444.2237611946
127.1568909021	42.3232419412	444.1693010289
127.1569032346	42.3232419412	444.1148408633
127.1569155672	42.3232419412	444.0603806977
127.1569278997	42.3232419412	444.0059205321
127.1569402322	42.3232419412	443.9514603665
127.1569525647	42.3232419412	443.8970002009
127.1569648973	42.3232419412	443.8446694139
127.1569772298	42.3232419412	443.8071639949
127.1569895623	42.3232419412	443.7696585758
127.1570018948	42.3232419412	443.7321531568
127.1570142273	42.3232419412	443.6946477377
127.1570265599	42.3232419412	443.6571423186
127.1570388924	42.3232419412	443.6196368996
127.1570512249	42.3232419412	443.5821311229
127.1570635574	42.3232419412	443.5446235475
127.1570758900	42.3232419412	443.5071159722
127.1570882225	42.3232419412	443.4696083968
127.1571005550	42.3232419412	443.4321008215
127.1571128875	42.3232419412	443.3945932461
127.1571252200	42.3232419412	443.3570856707
127.1571375526	42.3232419412	443.3212871311
127.1571498851	42.3232419412	443.2920683347
127.1571622176	42.3232419412	443.2628495383
127.1571745501	42.3232419412	443.2336307420
127.1571868827	42.3232419412	443.2044119456
127.1571992152	42.3232419412	443.1751931493
127.1572115477	42.3232419412	443.1459743529
127.1572238802	42.3232419412	443.1167555566
127.1572362127	42.3232419412	443.0875367602
127.1572485453	42.3232419412	443.0583179639
127.1572608778	42.3232419412	443.0290991675
127.1572732103	42.3232419412	442.9998803711
127.1572855428	42.3232419412	442.9706615748
127.1572978754	42.3232419412	442.9414427785
127.1573102079	42.3232419412	442.9122233637
127.1573225404	42.3232419412	442.8830024110
127.1573348729	42.3232419412	442.8537814584
127.1573472054	42.3232419412	442.8245605057
127.1573595380	42.3232419412	442.7953395531
127.1573718705	42.3232419412	442.7661186004
127.1573842030	42.3232419412	442.7368976477
127.1573965355	42.3232419412	442.7076774240
127.1574088681	42.3232419412	442.6784586999
127.1574212006	42.3232419412	442.6492399758
127.1574335331	42.3232419412	442.6200212518
127.1574458656	42.3232419412	442.5908025277
127.1574581982	42.3232419412	442.5615838036
127.1574705307	42.3232419412	442.5323650795
127.1574828632	42.3232419412	442.5031463555
127.1574951957	42.3232419412	442.4739276314
127.1575075282	42.3232419412	442.4447089073
127.1575198608	42.3232419412	442.4154901832
127.1575321933	42.3232419412	442.3862714591
127.1575445258	42.3232419412	442.3570527351
127.1575568583	42.3232419412	442.3278340110
127.1575691909	42.3232419412	442.2986143784
127.1575815234	42.3232419412	442.2693934257
127.1575938559	42.3232419412	442.2401724731
127.1576061884	42.3232419412	442.2109515204
127.1576185209	42.3232419412	442.1817305677
127.1576308535	42.3232419412	442.1525096151
127.1576431860	42.3232419412	442.1232886624
127.1576555185	42.3232419412	442.0940686757
127.1576678510	42.3232419412	442.0648498794
127.1576801836	42.3232419412	442.0356310830
127.1576925161	42.3232419412	442.0064122866
127.1577048486	42.3232419412	441.9771934903
127.1577171811	42.3232419412	441.9479746939
127.1577295136	42.3232419412	441.9187558976
127.1577418462	42.3232419412	441.8895381894
127.1577541787	42.3232419412	441.8603216216
127.1577665112	42.3232419412	441.8311050538
127.1577788437	42.3232419412	441.8018884861
127.1577911763	42.3232419412	441.7726719183
127.1578035088	42.3232419412	441.7434553506
127.1578158413	42.3232419412	441.7142387828
127.1563852687	42.3232510798	446.5302252392
127.1563976012	42.3232510798	446.4603648077
127.1564099337	42.3232510798	446.3905043763
127.1564222663	42.3232510798	446.3206439449
127.1564345988	42.3232510798	446.2507835135
127.1564469313	42.3232510798	446.1809230821
127.1564592638	42.3232510798	446.1171860157
127.1564715964	42.3232510798	446.0542539760
127.1564839289	42.3232510798	445.9913219363
127.1564962614	42.3232510798	445.9283898966
127.1565085939	42.3232510798	445.8654578569
127.1565209264	42.3232510798	445.8025258171
127.1565332590	42.3232510798	445.7395937774
127.1565455915	42.3232510798	445.6766592469
127.1565579240	42.3232510798	445.6137245117
127.1565702565	42.3232510798	445.5507897765
127.1565825891	42.3232510798	445.4878550413
127.1565949216	42.3232510798	445.4249203061
127.1566072541	42.3232510798	445.3619855710
127.1566195866	42.3232510798	445.2990508359
127.1566319191	42.3232510798	445.2361212997
127.1566442517	42.3232510798	445.1731919554
127.1566565842	42.3232510798	445.1102626112
127.1566689167	42.3232510798	445.0473332670
127.1566812492	42.3232510798	444.9844039227
127.1566935818	42.3232510798	444.9214745784
127.1567059143	42.3232510798	444.8585452342
127.1567182468	42.3232510798	444.7956158899
127.1567305793	42.3232510798	444.7326865457
127.1567429119	42.3232510798	444.6697572014
127.1567552444	42.3232510798	444.6068278572
127.1567675769	42.3232510798	444.5438985129
127.1567799094	42.3232510798	444.4809691686
127.1567922419	42.3232510798	444.4184480213
127.1568045745	42.3232510798	444.3645903001
127.1568169070	42.3232510798	444.3107325790
127.1568292395	42.3232510798	444.2568748578
127.1568415720	42.3232510798	444.2030171366
127.1568539046	42.3232510798	444.1491594155
127.1568662371	42.3232510798	444.0953016943
127.1568785696	42.3232510798	444.0414435991
127.1568909021	42.3232510798	443.9875814931
127.1569032346	42.3232510798	443.9337193870
127.1569155672	42.3232510798	443.8798572810
127.1569278997	42.3232510798	443.8259951749
127.1569402322	42.3232510798	443.7721330689
127.1569525647	42.3232510798	443.7182709628
127.1569648973	42.3232510798	443.6666885169
127.1569772298	42.3232510798	443.6309777434
127.1569895623	42.3232510798	443.5952669699
127.1570018948	42.3232510798	443.5595561964
127.1570142273	42.3232510798	443.5238454229
127.1570265599	42.3232510798	443.4881346493
127.1570388924	42.3232510798	443.4524238759
127.1570512249	42.3232510798	443.4167128221
127.1570635574	42.3232510798	443.3810003591
127.1570758900	42.3232510798	443.3452878962
127.1570882225	42.3232510798	443.3095754332
127.1571005550	42.3232510798	443.2738629703
127.1571128875	42.3232510798	443.2381505074
127.1571252200	42.3232510798	443.2024380444
127.1571375526	42.3232510798	443.1680643926
127.1571498851	42.3232510798	443.1388451294
127.1571622176	42.3232510798	443.1096258662
127.1571745501	42.3232510798	443.0804066030
127.1571868827	42.3232510798	443.0511873398
127.1571992152	42.3232510798	443.0219680765
127.1572115477	42.3232510798	442.9927488133
127.1572238802	42.3232510798	442.9635295501
127.1572362127	42.3232510798	442.9343102869
127.1572485453	42.3232510798	442.9050910236
127.1572608778	42.3232510798	442.8758717604
127.1572732103	42.3232510798	442.8466524972
127.1572855428	42.3232510798	442.8174332340
127.1572978754	42.3232510798	442.7882139708
127.1573102079	42.3232510798	442.7589942230
127.1573225404	42.3232510798	442.7297732704
127.1573348729	42.3232510798	442.7005523177
127.1573472054	42.3232510798	442.6713313650
127.1573595380	42.3232510798	442.6421104124
127.1573718705	42.3232510798	442.6128894597
127.1573842030	42.3232510798	442.5836685070
127.1573965355	42.3232510798	442.5544484360
127.1574088681	42.3232510798	442.5252301788
127.1574212006	42.3232510798	442.4960119216
127.1574335331	42.3232510798	442.4667936644
127.1574458656	42.3232510798	442.4375754072
127.1574581982	42.3232510798	442.4083571500
127.1574705307	42.3232510798	442.3791388928
127.1574828632	42.3232510798	442.3499206356
127.1574951957	42.3232510798	442.3207023784
127.1575075282	42.3232510798	442.2914841211
127.1575198608	42.3232510798	442.2622658639
127.1575321933	42.3232510798	442.2330476067
127.1575445258	42.3232510798	442.2038293495
127.1575568583	42.3232510798	442.1746110923
127.1575691909	42.3232510798	442.1453917363
127.1575815234	42.3232510798	442.1161707836
127.1575938559	42.3232510798	442.0869498309
127.1576061884	42.3232510798	442.0577288783
127.1576185209	42.3232510798	442.0285079256
127.1576308535	42.3232510798	441.9992869729
127.1576431860	42.3232510798	441.9700660203
127.1576555185	42.3232510798	441.9408458244
127.1576678510	42.3232510798	441.9116265612
127.1576801836	42.3232510798	441.8824072980
127.1576925161	42.3232510798	441.8531880348
127.1577048486	42.3232510798	441.8239687715
127.1577171811	42.3232510798	441.7947495083
127.1577295136	42.3232510798	441.7655302451
127.1577418462	42.3232510798	441.7363122980
127.1577541787	42.3232510798	441.7070957302
127.1577665112	42.3232510798	441.6778791624
127.1577788437	42.3232510798	441.6486625947
127.1577911763	42.3232510798	441.6194460269
127.1578035088	42.3232510798	441.5902294591
127.1578158413	42.3232510798	441.5610128914
127.1563852687	42.3232602184	446.3338954464
127.1563976012	42.3232602184	446.2659496459
127.1564099337	42.3232602184	446.1980038454
127.1564222663	42.3232602184	446.1300580450
127.1564345988	42.3232602184	446.0621122445
127.1564469313	42.3232602184	445.9941664441
127.1564592638	42.3232602184	445.9306518433
127.1564715964	42.3232602184	445.8677198036
127.1564839289	42.3232602184	445.8047877639
127.1564962614	42.3232602184	445.7418557242
127.1565085939	42.3232602184	445.6789236845
127.1565209264	42.3232602184	445.6159916447
127.1565332590	42.3232602184	445.5530596050
127.1565455915	42.3232602184	445.4901246430
127.1565579240	42.3232602184	445.4271894410
127.1565702565	42.3232602184	445.3642542389
127.1565825891	42.3232602184	445.3013190369
127.1565949216	42.3232602184	445.2383838348
127.1566072541	42.3232602184	445.1754486329
127.1566195866	42.3232602184	445.1125134308
127.1566319191	42.3232602184	445.0495843283
127.1566442517	42.3232602184	444.9866554509
127.1566565842	42.3232602184	444.9237265735
127.1566689167	42.3232602184	444.8607976962
127.1566812492	42.3232602184	444.7978688188
127.1566935818	42.3232602184	444.7349399414
127.1567059143	42.3232602184	444.6720110640
127.1567182468	42.3232602184	444.6090821866
127.1567305793	42.3232602184	444.5461533092
127.1567429119	42.3232602184	444.4832244318
127.1567552444	42.3232602184	444.4202955544
127.1567675769	42.3232602184	444.3573666771
127.1567799094	42.3232602184	444.2944377997
127.1567922419	42.3232602184	444.2319440091
127.1568045745	42.3232602184	444.1786843475
127.1568169070	42.3232602184	444.1254246859
127.1568292395	42.3232602184	444.0721650243
127.1568415720	42.3232602184	444.0189053627
127.1568539046	42.3232602184	443.9656457011
127.1568662371	42.3232602184	443.9123860395
127.1568785696	42.3232602184	443.8591260039
127.1568909021	42.3232602184	443.8058619574
127.1569032346	42.3232602184	443.7525979109
127.1569155672	42.3232602184	443.6993338644
127.1569278997	42.3232602184	443.6460698179
127.1569402322	42.3232602184	443.5928057714
127.1569525647	42.3232602184	443.5395417249
127.1569648973	42.3232602184	443.4887076200
127.1569772298	42.3232602184	443.4547914921
127.1569895623	42.3232602184	443.4208753641
127.1570018948	42.3232602184	443.3869592361
127.1570142273	42.3232602184	443.3530431081
127.1570265599	42.3232602184	443.3191269802
127.1570388924	42.3232602184	443.2852108522
127.1570512249	42.3232602184	443.2512945215
127.1570635574	42.3232602184	443.2173771709
127.1570758900	42.3232602184	443.1834598204
127.1570882225	42.3232602184	443.1495424698
127.1571005550	42.3232602184	443.1156251193
127.1571128875	42.3232602184	443.0817077688
127.1571252200	42.3232602184	443.0477904182
127.1571375526	42.3232602184	443.0148416544
127.1571498851	42.3232602184	442.9856219243
127.1571622176	42.3232602184	442.9564021942
127.1571745501	42.3232602184	442.9271824641
127.1571868827	42.3232602184	442.8979627340
127.1571992152	42.3232602184	442.8687430039
127.1572115477	42.3232602184	442.8395232738
127.1572238802	42.3232602184	442.8103035437
127.1572362127	42.3232602184	442.7810838136
127.1572485453	42.3232602184	442.7518640835
127.1572608778	42.3232602184	442.7226443534
127.1572732103	42.3232602184	442.6934246233
127.1572855428	42.3232602184	442.6642048932
127.1572978754	42.3232602184	442.6349851632
127.1573102079	42.3232602184	442.6057650825
127.1573225404	42.3232602184	442.5765441298
127.1573348729	42.3232602184	442.5473231771
127.1573472054	42.3232602184	442.5181022245
127.1573595380	42.3232602184	442.4888812718
127.1573718705	42.3232602184	442.4596603191
127.1573842030	42.3232602184	442.4304393665
127.1573965355	42.3232602184	442.4012194481
127.1574088681	42.3232602184	442.3720016578
127.1574212006	42.3232602184	442.3427838675
127.1574335331	42.3232602184	442.3135660771
127.1574458656	42.3232602184	442.2843482868
127.1574581982	42.3232602184	442.2551304965
127.1574705307	42.3232602184	442.2259127061
127.1574828632	42.3232602184	442.1966949158
127.1574951957	42.3232602184	442.1674771255
127.1575075282	42.3232602184	442.1382593351
127.1575198608	42.3232602184	442.1090415448
127.1575321933	42.3232602184	442.0798237544
127.1575445258	42.3232602184	442.0506059641
127.1575568583	42.3232602184	442.0213881738
127.1575691909	42.3232602184	441.9921690942
127.1575815234	42.3232602184	441.9629481416
127.1575938559	42.3232602184	441.9337271889
127.1576061884	42.3232602184	441.9045062363
127.1576185209	42.3232602184	441.8752852836
127.1576308535	42.3232602184	441.8460643309
127.1576431860	42.3232602184	441.8168433782
127.1576555185	42.3232602184	441.7876229733
127.1576678510	42.3232602184	441.7584032432
127.1576801836	42.3232602184	441.7291835131
127.1576925161	42.3232602184	441.6999637830
127.1577048486	42.3232602184	441.6707440529
127.1577171811	42.3232602184	441.6415243228
127.1577295136	42.3232602184	441.6123045927
127.1577418462	42.3232602184	441.5830864067
127.1577541787	42.3232602184	441.5538698389
127.1577665112	42.3232602184	441.5246532711
127.1577788437	42.3232602184	441.4954367034
127.1577911763	42.3232602184	441.4662201356
127.1578035088	42.3232602184	441.4370035679
127.1578158413	42.3232602184	441.4077870001
127.1563852687	42.3232693570	446.1375656537
127.1563976012	42.3232693570	446.0715344841
127.1564099337	42.3232693570	446.0055033146
127.1564222663	42.3232693570	445.9394721451
127.1564345988	42.3232693570	445.8734409756
127.1564469313	42.3232693570	445.8074098060
127.1564592638	42.3232693570	445.7441176709
127.1564715964	42.3232693570	445.6811856312
127.1564839289	42.3232693570	445.6182535915
127.1564962614	42.3232693570	445.5553215518
127.1565085939	42.3232693570	445.4923895121
127.1565209264	42.3232693570	445.4294574724
127.1565332590	42.3232693570	445.3665254326
127.1565455915	42.3232693570	445.3035900392
127.1565579240	42.3232693570	445.2406543703
127.1565702565	42.3232693570	445.1777187014
127.1565825891	42.3232693570	445.1147830325
127.1565949216	42.3232693570	445.0518473635
127.1566072541	42.3232693570	444.9889116947
127.1566195866	42.3232693570	444.9259760258
127.1566319191	42.3232693570	444.8630473569
127.1566442517	42.3232693570	444.8001189463
127.1566565842	42.3232693570	444.7371905358
127.1566689167	42.3232693570	444.6742621254
127.1566812492	42.3232693570	444.6113337148
127.1566935818	42.3232693570	444.5484053043
127.1567059143	42.3232693570	444.4854768938
127.1567182468	42.3232693570	444.4225484832
127.1567305793	42.3232693570	444.3596200728
127.1567429119	42.3232693570	444.2966916623
127.1567552444	42.3232693570	444.2337632517
127.1567675769	42.3232693570	444.1708348412
127.1567799094	42.3232693570	444.1079064307
127.1567922419	42.3232693570	444.0454399970
127.1568045745	42.3232693570	443.9927783949
127.1568169070	42.3232693570	443.9401167929
127.1568292395	42.3232693570	443.8874551908
127.1568415720	42.3232693570	443.8347935888
127.1568539046	42.3232693570	443.7821319868
127.1568662371	42.3232693570	443.7294703847
127.1568785696	42.3232693570	443.6768084086
127.1568909021	42.3232693570	443.6241424217
127.1569032346	42.3232693570	443.5714764347
127.1569155672	42.3232693570	443.5188104478
127.1569278997	42.3232693570	443.4661444609
127.1569402322	42.3232693570	443.4134784739
127.1569525647	42.3232693570	443.3608124869
127.1569648973	42.3232693570	443.3107267231
127.1569772298	42.3232693570	443.2786052407
127.1569895623	42.3232693570	443.2464837583
127.1570018948	42.3232693570	443.2143622759
127.1570142273	42.3232693570	443.1822407934
127.1570265599	42.3232693570	443.1501193110
127.1570388924	42.3232693570	443.1179978286
127.1570512249	42.3232693570	443.0858762208
127.1570635574	42.3232693570	443.0537539827
127.1570758900	42.3232693570	443.0216317445
127.1570882225	42.3232693570	442.9895095064
127.1571005550	42.3232693570	442.9573872683
127.1571128875	42.3232693570	442.9252650302
127.1571252200	42.3232693570	442.8931427920
127.1571375526	42.3232693570	442.8616189161
127.1571498851	42.3232693570	442.8323987191
127.1571622176	42.3232693570	442.8031785221
127.1571745501	42.3232693570	442.7739583252
127.1571868827	42.3232693570	442.7447381282
127.1571992152	42.3232693570	442.7155179313
127.1572115477	42.3232693570	442.6862977343
127.1572238802	42.3232693570	442.6570775373
127.1572362127	42.3232693570	442.6278573404
127.1572485453	42.3232693570	442.5986371434
127.1572608778	42.3232693570	442.5694169465
127.1572732103	42.3232693570	442.5401967495
127.1572855428	42.3232693570	442.5109765525
127.1572978754	42.3232693570	442.4817563556
127.1573102079	42.3232693570	442.4525359419
127.1573225404	42.3232693570	442.4233149892
127.1573348729	42.3232693570	442.3940940366
127.1573472054	42.3232693570	442.3648730839
127.1573595380	42.3232693570	442.3356521313
127.1573718705	42.3232693570	442.3064311786
127.1573842030	42.3232693570	442.2772102259
127.1573965355	42.3232693570	442.2479904603
127.1574088681	42.3232693570	442.2187731368
127.1574212006	42.3232693570	442.1895558134
127.1574335331	42.3232693570	442.1603384899
127.1574458656	42.3232693570	442.1311211664
127.1574581982	42.3232693570	442.1019038429
127.1574705307	42.3232693570	442.0726865195
127.1574828632	42.3232693570	442.0434691960
127.1574951957	42.3232693570	442.0142518726
127.1575075282	42.3232693570	441.9850345491
127.1575198608	42.3232693570	441.9558172256
127.1575321933	42.3232693570	441.9265999021
127.1575445258	42.3232693570	441.8973825787
127.1575568583	42.3232693570	441.8681652552
127.1575691909	42.3232693570	441.8389464522
127.1575815234	42.3232693570	441.8097254995
127.1575938559	42.3232693570	441.7805045469
127.1576061884	42.3232693570	441.7512835942
127.1576185209	42.3232693570	441.7220626416
127.1576308535	42.3232693570	441.6928416889
127.1576431860	42.3232693570	441.6636207362
127.1576555185	42.3232693570	441.6344001221
127.1576678510	42.3232693570	441.6051799252
127.1576801836	42.3232693570	441.5759597282
127.1576925161	42.3232693570	441.5467395312
127.1577048486	42.3232693570	441.5175193342
127.1577171811	42.3232693570	441.4882991373
127.1577295136	42.3232693570	441.4590789403
127.1577418462	42.3232693570	441.4298605154
127.1577541787	42.3232693570	441.4006439476
127.1577665112	42.3232693570	441.3714273798
127.1577788437	42.3232693570	441.3422108121
127.1577911763	42.3232693570	441.3129942443
127.1578035088	42.3232693570	441.2837776766
127.1578158413	42.3232693570	441.2545611088
127.1563852687	42.3232784955	445.9412358609
127.1563976012	42.3232784955	445.8771193223
127.1564099337	42.3232784955	445.8130027838
127.1564222663	42.3232784955	445.7488862452
127.1564345988	42.3232784955	445.6847697066
127.1564469313	42.3232784955	445.6206531680
127.1564592638	42.3232784955	445.5575834985
127.1564715964	42.3232784955	445.4946514588
127.1564839289	42.3232784955	445.4317194191
127.1564962614	42.3232784955	445.3687873794
127.1565085939	42.3232784955	445.3058553397
127.1565209264	42.3232784955	445.2429233000
127.1565332590	42.3232784955	445.1799912602
127.1565455915	42.3232784955	445.1170554354
127.1565579240	42.3232784955	445.0541192996
127.1565702565	42.3232784955	444.9911831638
127.1565825891	42.3232784955	444.9282470280
127.1565949216	42.3232784955	444.8653108922
127.1566072541	42.3232784955	444.8023747565
127.1566195866	42.3232784955	444.7394386207
127.1566319191	42.3232784955	444.6765103855
127.1566442517	42.3232784955	444.6135824418
127.1566565842	42.3232784955	444.5506544981
127.1566689167	42.3232784955	444.4877265546
127.1566812492	42.3232784955	444.4247986109
127.1566935818	42.3232784955	444.3618706672
127.1567059143	42.3232784955	444.2989427236
127.1567182468	42.3232784955	444.2360147799
127.1567305793	42.3232784955	444.1730868363
127.1567429119	42.3232784955	444.1101588927
127.1567552444	42.3232784955	444.0472309490
127.1567675769	42.3232784955	443.9843030054
127.1567799094	42.3232784955	443.9213750617
127.1567922419	42.3232784955	443.8589359848
127.1568045745	42.3232784955	443.8068724423
127.1568169070	42.3232784955	443.7548088998
127.1568292395	42.3232784955	443.7027453573
127.1568415720	42.3232784955	443.6506818148
127.1568539046	42.3232784955	443.5986182724
127.1568662371	42.3232784955	443.5465547299
127.1568785696	42.3232784955	443.4944908134
127.1568909021	42.3232784955	443.4424228860
127.1569032346	42.3232784955	443.3903549586
127.1569155672	42.3232784955	443.3382870312
127.1569278997	42.3232784955	443.2862191038
127.1569402322	42.3232784955	443.2341511764
127.1569525647	42.3232784955	443.1820832490
127.1569648973	42.3232784955	443.1327458263
127.1569772298	42.3232784955	443.1024189894
127.1569895623	42.3232784955	443.0720921525
127.1570018948	42.3232784955	443.0417653156
127.1570142273	42.3232784955	443.0114384787
127.1570265599	42.3232784955	442.9811116418
127.1570388924	42.3232784955	442.9507848050
127.1570512249	42.3232784955	442.9204579202
127.1570635574	42.3232784955	442.8901307944
127.1570758900	42.3232784955	442.8598036687
127.1570882225	42.3232784955	442.8294765430
127.1571005550	42.3232784955	442.7991494173
127.1571128875	42.3232784955	442.7688222916
127.1571252200	42.3232784955	442.7384951658
127.1571375526	42.3232784955	442.7083961778
127.1571498851	42.3232784955	442.6791755140
127.1571622176	42.3232784955	442.6499548501
127.1571745501	42.3232784955	442.6207341863
127.1571868827	42.3232784955	442.5915135225
127.1571992152	42.3232784955	442.5622928586
127.1572115477	42.3232784955	442.5330721948
127.1572238802	42.3232784955	442.5038515310
127.1572362127	42.3232784955	442.4746308672
127.1572485453	42.3232784955	442.4454102033
127.1572608778	42.3232784955	442.4161895395
127.1572732103	42.3232784955	442.3869688756
127.1572855428	42.3232784955	442.3577482118
127.1572978754	42.3232784955	442.3285275480
127.1573102079	42.3232784955	442.2993068013
127.1573225404	42.3232784955	442.2700858487
127.1573348729	42.3232784955	442.2408648960
127.1573472054	42.3232784955	442.2116439433
127.1573595380	42.3232784955	442.1824229907
127.1573718705	42.3232784955	442.1532020380
127.1573842030	42.3232784955	442.1239810854
127.1573965355	42.3232784955	442.0947614724
127.1574088681	42.3232784955	442.0655446158
127.1574212006	42.3232784955	442.0363277592
127.1574335331	42.3232784955	442.0071109026
127.1574458656	42.3232784955	441.9778940460
127.1574581982	42.3232784955	441.9486771894
127.1574705307	42.3232784955	441.9194603328
127.1574828632	42.3232784955	441.8902434763
127.1574951957	42.3232784955	441.8610266196
127.1575075282	42.3232784955	441.8318097630
127.1575198608	42.3232784955	441.8025929064
127.1575321933	42.3232784955	441.7733760498
127.1575445258	42.3232784955	441.7441591933
127.1575568583	42.3232784955	441.7149423367
127.1575691909	42.3232784955	441.6857238102
127.1575815234	42.3232784955	441.6565028575
127.1575938559	42.3232784955	441.6272819049
127.1576061884	42.3232784955	441.5980609522
127.1576185209	42.3232784955	441.5688399995
127.1576308535	42.3232784955	441.5396190469
127.1576431860	42.3232784955	441.5103980942
127.1576555185	42.3232784955	441.4811772709
127.1576678510	42.3232784955	441.4519566071
127.1576801836	42.3232784955	441.4227359433
127.1576925161	42.3232784955	441.3935152794
127.1577048486	42.3232784955	441.3642946156
127.1577171811	42.3232784955	441.3350739518
127.1577295136	42.3232784955	441.3058532880
127.1577418462	42.3232784955	441.2766346241
127.1577541787	42.3232784955	441.2474180563
127.1577665112	42.3232784955	441.2182014886
127.1577788437	42.3232784955	441.1889849208
127.1577911763	42.3232784955	441.1597683530
127.1578035088	42.3232784955	441.1305517853
127.1578158413	42.3232784955	441.1013352175
127.1563852687	42.3232876341	445.7486415644
127.1563976012	42.3232876341	445.6857095247
127.1564099337	42.3232876341	445.6227774850
127.1564222663	42.3232876341	445.5598454453
127.1564345988	42.3232876341	445.4969134056
127.1564469313	42.3232876341	445.4339813659
127.1564592638	42.3232876341	445.3710493261
127.1564715964	42.3232876341	445.3081172864
127.1564839289	42.3232876341	445.2451852468
127.1564962614	42.3232876341	445.1822532070
127.1565085939	42.3232876341	445.1193211673
127.1565209264	42.3232876341	445.0563891276
127.1565332590	42.3232876341	444.9934570879
127.1565455915	42.3232876341	444.9305211606
127.1565579240	42.3232876341	444.8675849140
127.1565702565	42.3232876341	444.8046486675
127.1565825891	42.3232876341	444.7417124209
127.1565949216	42.3232876341	444.6787761743
127.1566072541	42.3232876341	444.6158399278
127.1566195866	42.3232876341	444.5529036812
127.1566319191	42.3232876341	444.4904156155
127.1566442517	42.3232876341	444.4279440930
127.1566565842	42.3232876341	444.3654725704
127.1566689167	42.3232876341	444.3030010479
127.1566812492	42.3232876341	444.2405295253
127.1566935818	42.3232876341	444.1780580028
127.1567059143	42.3232876341	444.1155864802
127.1567182468	42.3232876341	444.0531149576
127.1567305793	42.3232876341	443.9906434351
127.1567429119	42.3232876341	443.9281719125
127.1567552444	42.3232876341	443.8657003900
127.1567675769	42.3232876341	443.8032288674
127.1567799094	42.3232876341	443.7407573448
127.1567922419	42.3232876341	443.6787913327
127.1568045745	42.3232876341	443.6275540939
127.1568169070	42.3232876341	443.5763168551
127.1568292395	42.3232876341	443.5250796164
127.1568415720	42.3232876341	443.4738423776
127.1568539046	42.3232876341	443.4226051388
127.1568662371	42.3232876341	443.3713679001
127.1568785696	42.3232876341	443.3201303025
127.1568909021	42.3232876341	443.2688888568
127.1569032346	42.3232876341	443.2176474112
127.1569155672	42.3232876341	443.1664059656
127.1569278997	42.3232876341	443.1151645200
127.1569402322	42.3232876341	443.0639230743
127.1569525647	42.3232876341	443.0126816287
127.1569648973	42.3232876341	442.9642063067
127.1569772298	42.3232876341	442.9349895609
127.1569895623	42.3232876341	442.9057728151
127.1570018948	42.3232876341	442.8765560693
127.1570142273	42.3232876341	442.8473393235
127.1570265599	42.3232876341	442.8181225777
127.1570388924	42.3232876341	442.7889058319
127.1570512249	42.3232876341	442.7596890861
127.1570635574	42.3232876341	442.7304723403
127.1570758900	42.3232876341	442.7012555945
127.1570882225	42.3232876341	442.6720388487
127.1571005550	42.3232876341	442.6428221029
127.1571128875	42.3232876341	442.6136053571
127.1571252200	42.3232876341	442.5843886113
127.1571375526	42.3232876341	442.5551710348
127.1571498851	42.3232876341	442.5259502601
127.1571622176	42.3232876341	442.4967294855
127.1571745501	42.3232876341	442.4675087109
127.1571868827	42.3232876341	442.4382879363
127.1571992152	42.3232876341	442.4090671616
127.1572115477	42.3232876341	442.3798463870
127.1572238802	42.3232876341	442.3506256124
127.1572362127	42.3232876341	442.3214048378
127.1572485453	42.3232876341	442.2921840631
127.1572608778	42.3232876341	442.2629632885
127.1572732103	42.3232876341	442.2337425139
127.1572855428	42.3232876341	442.2045217392
127.1572978754	42.3232876341	442.1753009646
127.1573102079	42.3232876341	442.1460801390
127.1573225404	42.3232876341	442.1168591863
127.1573348729	42.3232876341	442.0876382336
127.1573472054	42.3232876341	442.0584172809
127.1573595380	42.3232876341	442.0291963283
127.1573718705	42.3232876341	441.9999753756
127.1573842030	42.3232876341	441.9707544230
127.1573965355	42.3232876341	441.9415348463
127.1574088681	42.3232876341	441.9123181005
127.1574212006	42.3232876341	441.8831013547
127.1574335331	42.3232876341	441.8538846089
127.1574458656	42.3232876341	441.8246678631
127.1574581982	42.3232876341	441.7954511173
127.1574705307	42.3232876341	441.7662343714
127.1574828632	42.3232876341	441.7370176911
127.1574951957	42.3232876341	441.7078011233
127.1575075282	42.3232876341	441.6785845555
127.1575198608	42.3232876341	441.6493679878
127.1575321933	42.3232876341	441.6201514200
127.1575445258	42.3232876341	441.5909348522
127.1575568583	42.3232876341	441.5617182845
127.1575691909	42.3232876341	441.5325000017
127.1575815234	42.3232876341	441.5032792270
127.1575938559	42.3232876341	441.4740584524
127.1576061884	42.3232876341	441.4448376778
127.1576185209	42.3232876341	441.4156169032
127.1576308535	42.3232876341	441.3863961285
127.1576431860	42.3232876341	441.3571753539
127.1576555185	42.3232876341	441.3279544995
127.1576678510	42.3232876341	441.2987335469
127.1576801836	42.3232876341	441.2695125942
127.1576925161	42.3232876341	441.2402916415
127.1577048486	42.3232876341	441.2110706889
127.1577171811	42.3232876341	441.1818497362
127.1577295136	42.3232876341	441.1526287836
127.1577418462	42.3232876341	441.1234098850
127.1577541787	42.3232876341	441.0941931392
127.1577665112	42.3232876341	441.0649763933
127.1577788437	42.3232876341	441.0357596475
127.1577911763	42.3232876341	441.0065429018
127.1578035088	42.3232876341	440.9773261560
127.1578158413	42.3232876341	440.9481094101
127.1563852687	42.3232967727	445.5621073920
127.1563976012	42.3232967727	445.4991753523
127.1564099337	42.3232967727	445.4362433126
127.1564222663	42.3232967727	445.3733112729
127.1564345988	42.3232967727	445.3103792332
127.1564469313	42.3232967727	445.2474471935
127.1564592638	42.3232967727	445.1845151537
127.1564715964	42.3232967727	445.1215831140
127.1564839289	42.3232967727	445.0586510744
127.1564962614	42.3232967727	444.9957190346
127.1565085939	42.3232967727	444.9327869949
127.1565209264	42.3232967727	444.8698549552
127.1565332590	42.3232967727	444.8069229155
127.1565455915	42.3232967727	444.7439874197
127.1565579240	42.3232967727	444.6810516400
127.1565702565	42.3232967727	444.6181158602
127.1565825891	42.3232967727	444.5551800805
127.1565949216	42.3232967727	444.4922443008
127.1566072541	42.3232967727	444.4293085212
127.1566195866	42.3232967727	444.3663727415
127.1566319191	42.3232967727	444.3050382325
127.1566442517	42.3232967727	444.2437628290
127.1566565842	42.3232967727	444.1824874256
127.1566689167	42.3232967727	444.1212120222
127.1566812492	42.3232967727	444.0599366187
127.1566935818	42.3232967727	443.9986612153
127.1567059143	42.3232967727	443.9373858118
127.1567182468	42.3232967727	443.8761104084
127.1567305793	42.3232967727	443.8148350050
127.1567429119	42.3232967727	443.7535596015
127.1567552444	42.3232967727	443.6922841981
127.1567675769	42.3232967727	443.6310087946
127.1567799094	42.3232967727	443.5697333911
127.1567922419	42.3232967727	443.5089635191
127.1568045745	42.3232967727	443.4589228663
127.1568169070	42.3232967727	443.4088822135
127.1568292395	42.3232967727	443.3588415607
127.1568415720	42.3232967727	443.3088009079
127.1568539046	42.3232967727	443.2587602552
127.1568662371	42.3232967727	443.2087196024
127.1568785696	42.3232967727	443.1586786306
127.1568909021	42.3232967727	443.1086342378
127.1569032346	42.3232967727	443.0585898450
127.1569155672	42.3232967727	443.0085454523
127.1569278997	42.3232967727	442.9585010595
127.1569402322	42.3232967727	442.9084566667
127.1569525647	42.3232967727	442.8584122739
127.1569648973	42.3232967727	442.8109836060
127.1569772298	42.3232967727	442.7817663934
127.1569895623	42.3232967727	442.7525491807
127.1570018948	42.3232967727	442.7233319680
127.1570142273	42.3232967727	442.6941147554
127.1570265599	42.3232967727	442.6648975427
127.1570388924	42.3232967727	442.6356803300
127.1570512249	42.3232967727	442.6064631174
127.1570635574	42.3232967727	442.5772459047
127.1570758900	42.3232967727	442.5480286920
127.1570882225	42.3232967727	442.5188114793
127.1571005550	42.3232967727	442.4895942667
127.1571128875	42.3232967727	442.4603770540
127.1571252200	42.3232967727	442.4311598413
127.1571375526	42.3232967727	442.4019419905
127.1571498851	42.3232967727	442.3727216827
127.1571622176	42.3232967727	442.3435013749
127.1571745501	42.3232967727	442.3142810672
127.1571868827	42.3232967727	442.2850607594
127.1571992152	42.3232967727	442.2558404517
127.1572115477	42.3232967727	442.2266201439
127.1572238802	42.3232967727	442.1973998362
127.1572362127	42.3232967727	442.1681795284
127.1572485453	42.3232967727	442.1389592207
127.1572608778	42.3232967727	442.1097389129
127.1572732103	42.3232967727	442.0805186051
127.1572855428	42.3232967727	442.0512982974
127.1572978754	42.3232967727	442.0220779896
127.1573102079	42.3232967727	441.9928574969
127.1573225404	42.3232967727	441.9636365443
127.1573348729	42.3232967727	441.9344155916
127.1573472054	42.3232967727	441.9051946389
127.1573595380	42.3232967727	441.8759736863
127.1573718705	42.3232967727	441.8467527336
127.1573842030	42.3232967727	441.8175317809
127.1573965355	42.3232967727	441.7883120515
127.1574088681	42.3232967727	441.7590948389
127.1574212006	42.3232967727	441.7298776262
127.1574335331	42.3232967727	441.7006604135
127.1574458656	42.3232967727	441.6714432009
127.1574581982	42.3232967727	441.6422259882
127.1574705307	42.3232967727	441.6130087755
127.1574828632	42.3232967727	441.5837917998
127.1574951957	42.3232967727	441.5545752320
127.1575075282	42.3232967727	441.5253586642
127.1575198608	42.3232967727	441.4961420965
127.1575321933	42.3232967727	441.4669255287
127.1575445258	42.3232967727	441.4377089609
127.1575568583	42.3232967727	441.4084923932
127.1575691909	42.3232967727	441.3792743007
127.1575815234	42.3232967727	441.3500539929
127.1575938559	42.3232967727	441.3208336852
127.1576061884	42.3232967727	441.2916133774
127.1576185209	42.3232967727	441.2623930697
127.1576308535	42.3232967727	441.2331727619
127.1576431860	42.3232967727	441.2039524542
127.1576555185	42.3232967727	441.1747318575
127.1576678510	42.3232967727	441.1455109049
127.1576801836	42.3232967727	441.1162899522
127.1576925161	42.3232967727	441.0870689995
127.1577048486	42.3232967727	441.0578480469
127.1577171811	42.3232967727	441.0286270942
127.1577295136	42.3232967727	440.9994061415
127.1577418462	42.3232967727	440.9701870150
127.1577541787	42.3232967727	440.9409698023
127.1577665112	42.3232967727	440.9117525896
127.1577788437	42.3232967727	440.8825353770
127.1577911763	42.3232967727	440.8533181643
127.1578035088	42.3232967727	440.8241009516
127.1578158413	42.3232967727	440.7948837389
127.1563852687	42.3233059113	445.3755732196
127.1563976012	42.3233059113	445.3126411799
127.1564099337	42.3233059113	445.2497091402
127.1564222663	42.3233059113	445.1867771005
127.1564345988	42.3233059113	445.1238450608
127.1564469313	42.3233059113	445.0609130211
127.1564592638	42.3233059113	444.9979809814
127.1564715964	42.3233059113	444.9350489416
127.1564839289	42.3233059113	444.8721169020
127.1564962614	42.3233059113	444.8091848623
127.1565085939	42.3233059113	444.7462528225
127.1565209264	42.3233059113	444.6833207828
127.1565332590	42.3233059113	444.6203887431
127.1565455915	42.3233059113	444.5574536787
127.1565579240	42.3233059113	444.4945183659
127.1565702565	42.3233059113	444.4315830530
127.1565825891	42.3233059113	444.3686477402
127.1565949216	42.3233059113	444.3057124273
127.1566072541	42.3233059113	444.2427771146
127.1566195866	42.3233059113	444.1798418017
127.1566319191	42.3233059113	444.1196608495
127.1566442517	42.3233059113	444.0595815651
127.1566565842	42.3233059113	443.9995022808
127.1566689167	42.3233059113	443.9394229965
127.1566812492	42.3233059113	443.8793437122
127.1566935818	42.3233059113	443.8192644278
127.1567059143	42.3233059113	443.7591851435
127.1567182468	42.3233059113	443.6991058591
127.1567305793	42.3233059113	443.6390265748
127.1567429119	42.3233059113	443.5789472905
127.1567552444	42.3233059113	443.5188680062
127.1567675769	42.3233059113	443.4587887218
127.1567799094	42.3233059113	443.3987094375
127.1567922419	42.3233059113	443.3391357056
127.1568045745	42.3233059113	443.2902916388
127.1568169070	42.3233059113	443.2414475719
127.1568292395	42.3233059113	443.1926035051
127.1568415720	42.3233059113	443.1437594383
127.1568539046	42.3233059113	443.0949153716
127.1568662371	42.3233059113	443.0460713047
127.1568785696	42.3233059113	442.9972269588
127.1568909021	42.3233059113	442.9483796188
127.1569032346	42.3233059113	442.8995322789
127.1569155672	42.3233059113	442.8506849390
127.1569278997	42.3233059113	442.8018375991
127.1569402322	42.3233059113	442.7529902591
127.1569525647	42.3233059113	442.7041429192
127.1569648973	42.3233059113	442.6577609054
127.1569772298	42.3233059113	442.6285432259
127.1569895623	42.3233059113	442.5993255463
127.1570018948	42.3233059113	442.5701078668
127.1570142273	42.3233059113	442.5408901872
127.1570265599	42.3233059113	442.5116725077
127.1570388924	42.3233059113	442.4824548282
127.1570512249	42.3233059113	442.4532371486
127.1570635574	42.3233059113	442.4240194691
127.1570758900	42.3233059113	442.3948017895
127.1570882225	42.3233059113	442.3655841100
127.1571005550	42.3233059113	442.3363664304
127.1571128875	42.3233059113	442.3071487509
127.1571252200	42.3233059113	442.2779310714
127.1571375526	42.3233059113	442.2487129462
127.1571498851	42.3233059113	442.2194931053
127.1571622176	42.3233059113	442.1902732644
127.1571745501	42.3233059113	442.1610534235
127.1571868827	42.3233059113	442.1318335826
127.1571992152	42.3233059113	442.1026137417
127.1572115477	42.3233059113	442.0733939008
127.1572238802	42.3233059113	442.0441740599
127.1572362127	42.3233059113	442.0149542191
127.1572485453	42.3233059113	441.9857343782
127.1572608778	42.3233059113	441.9565145373
127.1572732103	42.3233059113	441.9272946964
127.1572855428	42.3233059113	441.8980748555
127.1572978754	42.3233059113	441.8688550146
127.1573102079	42.3233059113	441.8396348549
127.1573225404	42.3233059113	441.8104139022
127.1573348729	42.3233059113	441.7811929496
127.1573472054	42.3233059113	441.7519719969
127.1573595380	42.3233059113	441.7227510443
127.1573718705	42.3233059113	441.6935300916
127.1573842030	42.3233059113	441.6643091389
127.1573965355	42.3233059113	441.6350892568
127.1574088681	42.3233059113	441.6058715773
127.1574212006	42.3233059113	441.5766538978
127.1574335331	42.3233059113	441.5474362182
127.1574458656	42.3233059113	441.5182185387
127.1574581982	42.3233059113	441.4890008591
127.1574705307	42.3233059113	441.4597831796
127.1574828632	42.3233059113	441.4305659085
127.1574951957	42.3233059113	441.4013493407
127.1575075282	42.3233059113	441.3721327729
127.1575198608	42.3233059113	441.3429162052
127.1575321933	42.3233059113	441.3136996374
127.1575445258	42.3233059113	441.2844830697
127.1575568583	42.3233059113	441.2552665019
127.1575691909	42.3233059113	441.2260485997
127.1575815234	42.3233059113	441.1968287589
127.1575938559	42.3233059113	441.1676089180
127.1576061884	42.3233059113	441.1383890771
127.1576185209	42.3233059113	441.1091692362
127.1576308535	42.3233059113	441.0799493953
127.1576431860	42.3233059113	441.0507295544
127.1576555185	42.3233059113	441.0215092155
127.1576678510	42.3233059113	440.9922882628
127.1576801836	42.3233059113	440.9630673102
127.1576925161	42.3233059113	440.9338463575
127.1577048486	42.3233059113	440.9046254048
127.1577171811	42.3233059113	440.8754044522
127.1577295136	42.3233059113	440.8461834995
127.1577418462	42.3233059113	440.8169641450
127.1577541787	42.3233059113	440.7877464655
127.1577665112	42.3233059113	440.7585287859
127.1577788437	42.3233059113	440.7293111064
127.1577911763	42.3233059113	440.7000934269
127.1578035088	42.3233059113	440.6708757473
127.1578158413	42.3233059113	440.6416580678
127.1563852687	42.3233150498	445.1890390471
127.1563976012	42.3233150498	445.1261070074
127.1564099337	42.3233150498	445.0631749676
127.1564222663	42.3233150498	445.0002429280
127.1564345988	42.3233150498	444.9373108883
127.1564469313	42.3233150498	444.8743788485
127.1564592638	42.3233150498	444.8114468088
127.1564715964	42.3233150498	444.7485147691
127.1564839289	42.3233150498	444.6855827294
127.1564962614	42.3233150498	444.6226506897
127.1565085939	42.3233150498	444.5597186500
127.1565209264	42.3233150498	444.4967866103
127.1565332590	42.3233150498	444.4338545706
127.1565455915	42.3233150498	444.3709199376
127.1565579240	42.3233150498	444.3079850917
127.1565702565	42.3233150498	444.2450502457
127.1565825891	42.3233150498	444.1821153997
127.1565949216	42.3233150498	444.1191805537
127.1566072541	42.3233150498	444.0562457078
127.1566195866	42.3233150498	443.9933108619
127.1566319191	42.3233150498	443.9342834663
127.1566442517	42.3233150498	443.8754003011
127.1566565842	42.3233150498	443.8165171358
127.1566689167	42.3233150498	443.7576339707
127.1566812492	42.3233150498	443.6987508054
127.1566935818	42.3233150498	443.6398676402
127.1567059143	42.3233150498	443.5809844750
127.1567182468	42.3233150498	443.5221013097
127.1567305793	42.3233150498	443.4632181446
127.1567429119	42.3233150498	443.4043349794
127.1567552444	42.3233150498	443.3454518141
127.1567675769	42.3233150498	443.2865686489
127.1567799094	42.3233150498	443.2276854837
127.1567922419	42.3233150498	443.1693078919
127.1568045745	42.3233150498	443.1216604111
127.1568169070	42.3233150498	443.0740129302
127.1568292395	42.3233150498	443.0263654494
127.1568415720	42.3233150498	442.9787179686
127.1568539046	42.3233150498	442.9310704878
127.1568662371	42.3233150498	442.8834230070
127.1568785696	42.3233150498	442.8357752868
127.1568909021	42.3233150498	442.7881249997
127.1569032346	42.3233150498	442.7404747126
127.1569155672	42.3233150498	442.6928244256
127.1569278997	42.3233150498	442.6451741385
127.1569402322	42.3233150498	442.5975238514
127.1569525647	42.3233150498	442.5498735643
127.1569648973	42.3233150498	442.5045382046
127.1569772298	42.3233150498	442.4753200582
127.1569895623	42.3233150498	442.4461019118
127.1570018948	42.3233150498	442.4168837654
127.1570142273	42.3233150498	442.3876656190
127.1570265599	42.3233150498	442.3584474726
127.1570388924	42.3233150498	442.3292293262
127.1570512249	42.3233150498	442.3000111798
127.1570635574	42.3233150498	442.2707930333
127.1570758900	42.3233150498	442.2415748869
127.1570882225	42.3233150498	442.2123567405
127.1571005550	42.3233150498	442.1831385941
127.1571128875	42.3233150498	442.1539204477
127.1571252200	42.3233150498	442.1247023013
127.1571375526	42.3233150498	442.0954839017
127.1571498851	42.3233150498	442.0662645277
127.1571622176	42.3233150498	442.0370451537
127.1571745501	42.3233150498	442.0078257797
127.1571868827	42.3233150498	441.9786064057
127.1571992152	42.3233150498	441.9493870317
127.1572115477	42.3233150498	441.9201676576
127.1572238802	42.3233150498	441.8909482836
127.1572362127	42.3233150498	441.8617289096
127.1572485453	42.3233150498	441.8325095356
127.1572608778	42.3233150498	441.8032901616
127.1572732103	42.3233150498	441.7740707875
127.1572855428	42.3233150498	441.7448514135
127.1572978754	42.3233150498	441.7156320395
127.1573102079	42.3233150498	441.6864122128
127.1573225404	42.3233150498	441.6571912601
127.1573348729	42.3233150498	441.6279703074
127.1573472054	42.3233150498	441.5987493548
127.1573595380	42.3233150498	441.5695284021
127.1573718705	42.3233150498	441.5403074495
127.1573842030	42.3233150498	441.5110864968
127.1573965355	42.3233150498	441.4818664620
127.1574088681	42.3233150498	441.4526483156
127.1574212006	42.3233150498	441.4234301692
127.1574335331	42.3233150498	441.3942120228
127.1574458656	42.3233150498	441.3649938763
127.1574581982	42.3233150498	441.3357757299
127.1574705307	42.3233150498	441.3065575835
127.1574828632	42.3233150498	441.2773400171
127.1574951957	42.3233150498	441.2481234493
127.1575075282	42.3233150498	441.2189068815
127.1575198608	42.3233150498	441.1896903138
127.1575321933	42.3233150498	441.1604737460
127.1575445258	42.3233150498	441.1312571782
127.1575568583	42.3233150498	441.1020406105
127.1575691909	42.3233150498	441.0728228987
127.1575815234	42.3233150498	441.0436035246
127.1575938559	42.3233150498	441.0143841506
127.1576061884	42.3233150498	440.9851647766
127.1576185209	42.3233150498	440.9559454026
127.1576308535	42.3233150498	440.9267260286
127.1576431860	42.3233150498	440.8975066546
127.1576555185	42.3233150498	440.8682865733
127.1576678510	42.3233150498	440.8390656207
127.1576801836	42.3233150498	440.8098446680
127.1576925161	42.3233150498	440.7806237154
127.1577048486	42.3233150498	440.7514027627
127.1577171811	42.3233150498	440.7221818100
127.1577295136	42.3233150498	440.6929608574
127.1577418462	42.3233150498	440.6637412749
127.1577541787	42.3233150498	440.6345231285
127.1577665112	42.3233150498	440.6053049821
127.1577788437	42.3233150498	440.5760868357
127.1577911763	42.3233150498	440.5468686893
127.1578035088	42.3233150498	440.5176505429
127.1578158413	42.3233150498	440.4884323964
127.1563852687	42.3233241884	445.0025048747
127.1563976012	42.3233241884	444.9395728350
127.1564099337	42.3233241884	444.8766407953
127.1564222663	42.3233241884	444.8137087556
127.1564345988	42.3233241884	444.7507767159
127.1564469313	42.3233241884	444.6878446762
127.1564592638	42.3233241884	444.6249126364
127.1564715964	42.3233241884	444.5619805967
127.1564839289	42.3233241884	444.4990485571
127.1564962614	42.3233241884	444.4361165173
127.1565085939	42.3233241884	444.3731844776
127.1565209264	42.3233241884	444.3102524379
127.1565332590	42.3233241884	444.2473203982
127.1565455915	42.3233241884	444.1843861967
127.1565579240	42.3233241884	444.1214518176
127.1565702565	42.3233241884	444.0585174385
127.1565825891	42.3233241884	443.9955830594
127.1565949216	42.3233241884	443.9326486803
127.1566072541	42.3233241884	443.8697143012
127.1566195866	42.3233241884	443.8067799221
127.1566319191	42.3233241884	443.7489060832
127.1566442517	42.3233241884	443.6912190371
127.1566565842	42.3233241884	443.6335319910
127.1566689167	42.3233241884	443.5758449450
127.1566812492	42.3233241884	443.5181578988
127.1566935818	42.3233241884	443.4604708527
127.1567059143	42.3233241884	443.4027838066
127.1567182468	42.3233241884	443.3450967605
127.1567305793	42.3233241884	443.2874097144
127.1567429119	42.3233241884	443.2297226683
127.1567552444	42.3233241884	443.1720356222
127.1567675769	42.3233241884	443.1143485761
127.1567799094	42.3233241884	443.0566615300
127.1567922419	42.3233241884	442.9994800783
127.1568045745	42.3233241884	442.9530291835
127.1568169070	42.3233241884	442.9065782886
127.1568292395	42.3233241884	442.8601273938
127.1568415720	42.3233241884	442.8136764989
127.1568539046	42.3233241884	442.7672256041
127.1568662371	42.3233241884	442.7207747093
127.1568785696	42.3233241884	442.6743236149
127.1568909021	42.3233241884	442.6278703807
127.1569032346	42.3233241884	442.5814171465
127.1569155672	42.3233241884	442.5349639123
127.1569278997	42.3233241884	442.4885106781
127.1569402322	42.3233241884	442.4420574438
127.1569525647	42.3233241884	442.3956042096
127.1569648973	42.3233241884	442.3513155040
127.1569772298	42.3233241884	442.3220968907
127.1569895623	42.3233241884	442.2928782774
127.1570018948	42.3233241884	442.2636596641
127.1570142273	42.3233241884	442.2344410508
127.1570265599	42.3233241884	442.2052224376
127.1570388924	42.3233241884	442.1760038243
127.1570512249	42.3233241884	442.1467852110
127.1570635574	42.3233241884	442.1175665977
127.1570758900	42.3233241884	442.0883479844
127.1570882225	42.3233241884	442.0591293712
127.1571005550	42.3233241884	442.0299107579
127.1571128875	42.3233241884	442.0006921446
127.1571252200	42.3233241884	441.9714735313
127.1571375526	42.3233241884	441.9422548574
127.1571498851	42.3233241884	441.9130359503
127.1571622176	42.3233241884	441.8838170431
127.1571745501	42.3233241884	441.8545981360
127.1571868827	42.3233241884	441.8253792289
127.1571992152	42.3233241884	441.7961603217
127.1572115477	42.3233241884	441.7669414145
127.1572238802	42.3233241884	441.7377225074
127.1572362127	42.3233241884	441.7085036003
127.1572485453	42.3233241884	441.6792846931
127.1572608778	42.3233241884	441.6500657860
127.1572732103	42.3233241884	441.6208468788
127.1572855428	42.3233241884	441.5916279716
127.1572978754	42.3233241884	441.5624090645
127.1573102079	42.3233241884	441.5331895708
127.1573225404	42.3233241884	441.5039686181
127.1573348729	42.3233241884	441.4747476654
127.1573472054	42.3233241884	441.4455267127
127.1573595380	42.3233241884	441.4163057601
127.1573718705	42.3233241884	441.3870848074
127.1573842030	42.3233241884	441.3578638548
127.1573965355	42.3233241884	441.3286436673
127.1574088681	42.3233241884	441.2994250540
127.1574212006	42.3233241884	441.2702064407
127.1574335331	42.3233241884	441.2409878274
127.1574458656	42.3233241884	441.2117692141
127.1574581982	42.3233241884	441.1825506009
127.1574705307	42.3233241884	441.1533319876
127.1574828632	42.3233241884	441.1241141258
127.1574951957	42.3233241884	441.0948975580
127.1575075282	42.3233241884	441.0656809902
127.1575198608	42.3233241884	441.0364644225
127.1575321933	42.3233241884	441.0072478547
127.1575445258	42.3233241884	440.9780312870
127.1575568583	42.3233241884	440.9488147192
127.1575691909	42.3233241884	440.9195971977
127.1575815234	42.3233241884	440.8903782905
127.1575938559	42.3233241884	440.8611593834
127.1576061884	42.3233241884	440.8319404763
127.1576185209	42.3233241884	440.8027215691
127.1576308535	42.3233241884	440.7735026620
127.1576431860	42.3233241884	440.7442837548
127.1576555185	42.3233241884	440.7150639313
127.1576678510	42.3233241884	440.6858429787
127.1576801836	42.3233241884	440.6566220260
127.1576925161	42.3233241884	440.6274010733
127.1577048486	42.3233241884	440.5981801207
127.1577171811	42.3233241884	440.5689591680
127.1577295136	42.3233241884	440.5397382154
127.1577418462	42.3233241884	440.5105184049
127.1577541787	42.3233241884	440.4812997917
127.1577665112	42.3233241884	440.4520811784
127.1577788437	42.3233241884	440.4228625651
127.1577911763	42.3233241884	440.3936439518
127.1578035088	42.3233241884	440.3644253385
127.1578158413	42.3233241884	440.3352067252
127.1563852687	42.3233333270	444.8159707023
127.1563976012	42.3233333270	444.7530386626
127.1564099337	42.3233333270	444.6901066229
127.1564222663	42.3233333270	444.6271745832
127.1564345988	42.3233333270	444.5642425435
127.1564469313	42.3233333270	444.5013105038
127.1564592638	42.3233333270	444.4383784641
127.1564715964	42.3233333270	444.3754464243
127.1564839289	42.3233333270	444.3125143847
127.1564962614	42.3233333270	444.2495823450
127.1565085939	42.3233333270	444.1866503052
127.1565209264	42.3233333270	444.1237182655
127.1565332590	42.3233333270	444.0607862258
127.1565455915	42.3233333270	443.9978524557
127.1565579240	42.3233333270	443.9349185435
127.1565702565	42.3233333270	443.8719846313
127.1565825891	42.3233333270	443.8090507190
127.1565949216	42.3233333270	443.7461168068
127.1566072541	42.3233333270	443.6831828946
127.1566195866	42.3233333270	443.6202489824
127.1566319191	42.3233333270	443.5635287002
127.1566442517	42.3233333270	443.5070377732
127.1566565842	42.3233333270	443.4505468462
127.1566689167	42.3233333270	443.3940559193
127.1566812492	42.3233333270	443.3375649923
127.1566935818	42.3233333270	443.2810740653
127.1567059143	42.3233333270	443.2245831383
127.1567182468	42.3233333270	443.1680922113
127.1567305793	42.3233333270	443.1116012843
127.1567429119	42.3233333270	443.0551103573
127.1567552444	42.3233333270	442.9986194303
127.1567675769	42.3233333270	442.9421285033
127.1567799094	42.3233333270	442.8856375763
127.1567922419	42.3233333270	442.8296522648
127.1568045745	42.3233333270	442.7843979559
127.1568169070	42.3233333270	442.7391436470
127.1568292395	42.3233333270	442.6938893382
127.1568415720	42.3233333270	442.6486350293
127.1568539046	42.3233333270	442.6033807205
127.1568662371	42.3233333270	442.5581264116
127.1568785696	42.3233333270	442.5128719431
127.1568909021	42.3233333270	442.4676157617
127.1569032346	42.3233333270	442.4223595803
127.1569155672	42.3233333270	442.3771033990
127.1569278997	42.3233333270	442.3318472176
127.1569402322	42.3233333270	442.2865910362
127.1569525647	42.3233333270	442.2413348548
127.1569648973	42.3233333270	442.1980928033
127.1569772298	42.3233333270	442.1688737232
127.1569895623	42.3233333270	442.1396546430
127.1570018948	42.3233333270	442.1104355629
127.1570142273	42.3233333270	442.0812164827
127.1570265599	42.3233333270	442.0519974026
127.1570388924	42.3233333270	442.0227783224
127.1570512249	42.3233333270	441.9935592423
127.1570635574	42.3233333270	441.9643401621
127.1570758900	42.3233333270	441.9351210820
127.1570882225	42.3233333270	441.9059020018
127.1571005550	42.3233333270	441.8766829217
127.1571128875	42.3233333270	441.8474638415
127.1571252200	42.3233333270	441.8182447614
127.1571375526	42.3233333270	441.7890258131
127.1571498851	42.3233333270	441.7598073729
127.1571622176	42.3233333270	441.7305889326
127.1571745501	42.3233333270	441.7013704923
127.1571868827	42.3233333270	441.6721520520
127.1571992152	42.3233333270	441.6429336117
127.1572115477	42.3233333270	441.6137151715
127.1572238802	42.3233333270	441.5844967312
127.1572362127	42.3233333270	441.5552782909
127.1572485453	42.3233333270	441.5260598506
127.1572608778	42.3233333270	441.4968414103
127.1572732103	42.3233333270	441.4676229701
127.1572855428	42.3233333270	441.4384045298
127.1572978754	42.3233333270	441.4091860895
127.1573102079	42.3233333270	441.3799669287
127.1573225404	42.3233333270	441.3507459761
127.1573348729	42.3233333270	441.3215250234
127.1573472054	42.3233333270	441.2923040707
127.1573595380	42.3233333270	441.2630831181
127.1573718705	42.3233333270	441.2338621654
127.1573842030	42.3233333270	441.2046412127
127.1573965355	42.3233333270	441.1754208725
127.1574088681	42.3233333270	441.1462017924
127.1574212006	42.3233333270	441.1169827123
127.1574335331	42.3233333270	441.0877636321
127.1574458656	42.3233333270	441.0585445519
127.1574581982	42.3233333270	441.0293254718
127.1574705307	42.3233333270	441.0001063916
127.1574828632	42.3233333270	440.9708882345
127.1574951957	42.3233333270	440.9416716667
127.1575075282	42.3233333270	440.9124550989
127.1575198608	42.3233333270	440.8832385312
127.1575321933	42.3233333270	440.8540219634
127.1575445258	42.3233333270	440.8248053957
127.1575568583	42.3233333270	440.7955888279
127.1575691909	42.3233333270	440.7663714967
127.1575815234	42.3233333270	440.7371530565
127.1575938559	42.3233333270	440.7079346162
127.1576061884	42.3233333270	440.6787161759
127.1576185209	42.3233333270	440.6494977356
127.1576308535	42.3233333270	440.6202792953
127.1576431860	42.3233333270	440.5910608551
127.1576555185	42.3233333270	440.5618412893
127.1576678510	42.3233333270	440.5326203367
127.1576801836	42.3233333270	440.5033993840
127.1576925161	42.3233333270	440.4741784313
127.1577048486	42.3233333270	440.4449574787
127.1577171811	42.3233333270	440.4157365260
127.1577295136	42.3233333270	440.3865155733
127.1577418462	42.3233333270	440.3572955350
127.1577541787	42.3233333270	440.3280764548
127.1577665112	42.3233333270	440.2988573747
127.1577788437	42.3233333270	440.2696382945
127.1577911763	42.3233333270	440.2404192144
127.1578035088	42.3233333270	440.2112001342
127.1578158413	42.3233333270	440.1819810541
127.1563852687	42.3233424656	444.6294365299
127.1563976012	42.3233424656	444.5665044902
127.1564099337	42.3233424656	444.5035724505
127.1564222663	42.3233424656	444.4406404108
127.1564345988	42.3233424656	444.3777083711
127.1564469313	42.3233424656	444.3147763314
127.1564592638	42.3233424656	444.2518442917
127.1564715964	42.3233424656	444.1889122519
127.1564839289	42.3233424656	444.1259802123
127.1564962614	42.3233424656	444.0630481726
127.1565085939	42.3233424656	444.0001161328
127.1565209264	42.3233424656	443.9371840931
127.1565332590	42.3233424656	443.8742520534
127.1565455915	42.3233424656	443.8113187148
127.1565579240	42.3233424656	443.7483852694
127.1565702565	42.3233424656	443.6854518240
127.1565825891	42.3233424656	443.6225183787
127.1565949216	42.3233424656	443.5595849333
127.1566072541	42.3233424656	443.4966514880
127.1566195866	42.3233424656	443.4337180426
127.1566319191	42.3233424656	443.3781513172
127.1566442517	42.3233424656	443.3228565093
127.1566565842	42.3233424656	443.2675617014
127.1566689167	42.3233424656	443.2122668936
127.1566812492	42.3233424656	443.1569720857
127.1566935818	42.3233424656	443.1016772778
127.1567059143	42.3233424656	443.0463824699
127.1567182468	42.3233424656	442.9910876620
127.1567305793	42.3233424656	442.9357928542
127.1567429119	42.3233424656	442.8804980463
127.1567552444	42.3233424656	442.8252032384
127.1567675769	42.3233424656	442.7699084305
127.1567799094	42.3233424656	442.7146136226
127.1567922419	42.3233424656	442.6598244512
127.1568045745	42.3233424656	442.6157667283
127.1568169070	42.3233424656	442.5717090055
127.1568292395	42.3233424656	442.5276512826
127.1568415720	42.3233424656	442.4835935597
127.1568539046	42.3233424656	442.4395358369
127.1568662371	42.3233424656	442.3954781140
127.1568785696	42.3233424656	442.3514202712
127.1568909021	42.3233424656	442.3073611427
127.1569032346	42.3233424656	442.2633020142
127.1569155672	42.3233424656	442.2192428857
127.1569278997	42.3233424656	442.1751837572
127.1569402322	42.3233424656	442.1311246286
127.1569525647	42.3233424656	442.0870655001
127.1569648973	42.3233424656	442.0448701027
127.1569772298	42.3233424656	442.0156505557
127.1569895623	42.3233424656	441.9864310086
127.1570018948	42.3233424656	441.9572114616
127.1570142273	42.3233424656	441.9279919146
127.1570265599	42.3233424656	441.8987723676
127.1570388924	42.3233424656	441.8695528206
127.1570512249	42.3233424656	441.8403332735
127.1570635574	42.3233424656	441.8111137265
127.1570758900	42.3233424656	441.7818941795
127.1570882225	42.3233424656	441.7526746325
127.1571005550	42.3233424656	441.7234550855
127.1571128875	42.3233424656	441.6942355384
127.1571252200	42.3233424656	441.6650159914
127.1571375526	42.3233424656	441.6357967688
127.1571498851	42.3233424656	441.6065787954
127.1571622176	42.3233424656	441.5773608220
127.1571745501	42.3233424656	441.5481428486
127.1571868827	42.3233424656	441.5189248752
127.1571992152	42.3233424656	441.4897069018
127.1572115477	42.3233424656	441.4604889284
127.1572238802	42.3233424656	441.4312709550
127.1572362127	42.3233424656	441.4020529816
127.1572485453	42.3233424656	441.3728350082
127.1572608778	42.3233424656	441.3436170347
127.1572732103	42.3233424656	441.3143990613
127.1572855428	42.3233424656	441.2851810879
127.1572978754	42.3233424656	441.2559631145
127.1573102079	42.3233424656	441.2267442867
127.1573225404	42.3233424656	441.1975233340
127.1573348729	42.3233424656	441.1683023814
127.1573472054	42.3233424656	441.1390814287
127.1573595380	42.3233424656	441.1098604761
127.1573718705	42.3233424656	441.0806395234
127.1573842030	42.3233424656	441.0514185707
127.1573965355	42.3233424656	441.0221980778
127.1574088681	42.3233424656	440.9929785308
127.1574212006	42.3233424656	440.9637589838
127.1574335331	42.3233424656	440.9345394368
127.1574458656	42.3233424656	440.9053198897
127.1574581982	42.3233424656	440.8761003427
127.1574705307	42.3233424656	440.8468807957
127.1574828632	42.3233424656	440.8176623432
127.1574951957	42.3233424656	440.7884457754
127.1575075282	42.3233424656	440.7592292077
127.1575198608	42.3233424656	440.7300126399
127.1575321933	42.3233424656	440.7007960721
127.1575445258	42.3233424656	440.6715795044
127.1575568583	42.3233424656	440.6423629366
127.1575691909	42.3233424656	440.6131457958
127.1575815234	42.3233424656	440.5839278224
127.1575938559	42.3233424656	440.5547098489
127.1576061884	42.3233424656	440.5254918756
127.1576185209	42.3233424656	440.4962739021
127.1576308535	42.3233424656	440.4670559287
127.1576431860	42.3233424656	440.4378379553
127.1576555185	42.3233424656	440.4086186473
127.1576678510	42.3233424656	440.3793976946
127.1576801836	42.3233424656	440.3501767420
127.1576925161	42.3233424656	440.3209557893
127.1577048486	42.3233424656	440.2917348366
127.1577171811	42.3233424656	440.2625138840
127.1577295136	42.3233424656	440.2332929313
127.1577418462	42.3233424656	440.2040726650
127.1577541787	42.3233424656	440.1748531180
127.1577665112	42.3233424656	440.1456335709
127.1577788437	42.3233424656	440.1164140239
127.1577911763	42.3233424656	440.0871944769
127.1578035088	42.3233424656	440.0579749299
127.1578158413	42.3233424656	440.0287553829
127.1563852687	42.3233516041	444.4429023575
127.1563976012	42.3233516041	444.3799703178
127.1564099337	42.3233516041	444.3170382781
127.1564222663	42.3233516041	444.2541062384
127.1564345988	42.3233516041	444.1911741987
127.1564469313	42.3233516041	444.1282421590
127.1564592638	42.3233516041	444.0653101193
127.1564715964	42.3233516041	444.0023780796
127.1564839289	42.3233516041	443.9394460399
127.1564962614	42.3233516041	443.8765140002
127.1565085939	42.3233516041	443.8135819605
127.1565209264	42.3233516041	443.7506499207
127.1565332590	42.3233516041	443.6877178810
127.1565455915	42.3233516041	443.6247849738
127.1565579240	42.3233516041	443.5618519953
127.1565702565	42.3233516041	443.4989190168
127.1565825891	42.3233516041	443.4359860383
127.1565949216	42.3233516041	443.3730530598
127.1566072541	42.3233516041	443.3101200814
127.1566195866	42.3233516041	443.2471871029
127.1566319191	42.3233516041	443.1927739341
127.1566442517	42.3233516041	443.1386752454
127.1566565842	42.3233516041	443.0845765566
127.1566689167	42.3233516041	443.0304778679
127.1566812492	42.3233516041	442.9763791791
127.1566935818	42.3233516041	442.9222804903
127.1567059143	42.3233516041	442.8681818015
127.1567182468	42.3233516041	442.8140831128
127.1567305793	42.3233516041	442.7599844241
127.1567429119	42.3233516041	442.7058857353
127.1567552444	42.3233516041	442.6517870465
127.1567675769	42.3233516041	442.5976883577
127.1567799094	42.3233516041	442.5435896690
127.1567922419	42.3233516041	442.4899966377
127.1568045745	42.3233516041	442.4471355008
127.1568169070	42.3233516041	442.4042743639
127.1568292395	42.3233516041	442.3614132270
127.1568415720	42.3233516041	442.3185520901
127.1568539046	42.3233516041	442.2756909532
127.1568662371	42.3233516041	442.2328298163
127.1568785696	42.3233516041	442.1899685993
127.1568909021	42.3233516041	442.1471065237
127.1569032346	42.3233516041	442.1042444480
127.1569155672	42.3233516041	442.0613823724
127.1569278997	42.3233516041	442.0185202967
127.1569402322	42.3233516041	441.9756582210
127.1569525647	42.3233516041	441.9327961454
127.1569648973	42.3233516041	441.8916474020
127.1569772298	42.3233516041	441.8624273881
127.1569895623	42.3233516041	441.8332073742
127.1570018948	42.3233516041	441.8039873603
127.1570142273	42.3233516041	441.7747673464
127.1570265599	42.3233516041	441.7455473326
127.1570388924	42.3233516041	441.7163273187
127.1570512249	42.3233516041	441.6871073048
127.1570635574	42.3233516041	441.6578872909
127.1570758900	42.3233516041	441.6286672770
127.1570882225	42.3233516041	441.5994472631
127.1571005550	42.3233516041	441.5702272492
127.1571128875	42.3233516041	441.5410072354
127.1571252200	42.3233516041	441.5117872215
127.1571375526	42.3233516041	441.4825677245
127.1571498851	42.3233516041	441.4533502180
127.1571622176	42.3233516041	441.4241327114
127.1571745501	42.3233516041	441.3949152049
127.1571868827	42.3233516041	441.3656976984
127.1571992152	42.3233516041	441.3364801918
127.1572115477	42.3233516041	441.3072626853
127.1572238802	42.3233516041	441.2780451787
127.1572362127	42.3233516041	441.2488276722
127.1572485453	42.3233516041	441.2196101657
127.1572608778	42.3233516041	441.1903926591
127.1572732103	42.3233516041	441.1611751526
127.1572855428	42.3233516041	441.1319576460
127.1572978754	42.3233516041	441.1027401395
127.1573102079	42.3233516041	441.0735216447
127.1573225404	42.3233516041	441.0443006920
127.1573348729	42.3233516041	441.0150797394
127.1573472054	42.3233516041	440.9858587867
127.1573595380	42.3233516041	440.9566378340
127.1573718705	42.3233516041	440.9274168814
127.1573842030	42.3233516041	440.8981959287
127.1573965355	42.3233516041	440.8689752831
127.1574088681	42.3233516041	440.8397552692
127.1574212006	42.3233516041	440.8105352553
127.1574335331	42.3233516041	440.7813152414
127.1574458656	42.3233516041	440.7520952275
127.1574581982	42.3233516041	440.7228752136
127.1574705307	42.3233516041	440.6936551998
127.1574828632	42.3233516041	440.6644364519
127.1574951957	42.3233516041	440.6352198841
127.1575075282	42.3233516041	440.6060033164
127.1575198608	42.3233516041	440.5767867486
127.1575321933	42.3233516041	440.5475701808
127.1575445258	42.3233516041	440.5183536131
127.1575568583	42.3233516041	440.4891370453
127.1575691909	42.3233516041	440.4599200948
127.1575815234	42.3233516041	440.4307025883
127.1575938559	42.3233516041	440.4014850817
127.1576061884	42.3233516041	440.3722675752
127.1576185209	42.3233516041	440.3430500687
127.1576308535	42.3233516041	440.3138325621
127.1576431860	42.3233516041	440.2846150556
127.1576555185	42.3233516041	440.2553960053
127.1576678510	42.3233516041	440.2261750526
127.1576801836	42.3233516041	440.1969541000
127.1576925161	42.3233516041	440.1677331473
127.1577048486	42.3233516041	440.1385121946
127.1577171811	42.3233516041	440.1092912419
127.1577295136	42.3233516041	440.0800702893
127.1577418462	42.3233516041	440.0508497950
127.1577541787	42.3233516041	440.0216297811
127.1577665112	42.3233516041	439.9924097672
127.1577788437	42.3233516041	439.9631897533
127.1577911763	42.3233516041	439.9339697395
127.1578035088	42.3233516041	439.9047497256
127.1578158413	42.3233516041	439.8755297117
127.1563852687	42.3233607427	444.2563681852
127.1563976012	42.3233607427	444.1934361454
127.1564099337	42.3233607427	444.1305041057
127.1564222663	42.3233607427	444.0675720661
127.1564345988	42.3233607427	444.0046400263
127.1564469313	42.3233607427	443.9417079866
127.1564592638	42.3233607427	443.8787759469
127.1564715964	42.3233607427	443.8158439072
127.1564839289	42.3233607427	443.7529118675
127.1564962614	42.3233607427	443.6899798278
127.1565085939	42.3233607427	443.6270477881
127.1565209264	42.3233607427	443.5641157483
127.1565332590	42.3233607427	443.5011837086
127.1565455915	42.3233607427	443.4382512329
127.1565579240	42.3233607427	443.3753187213
127.1565702565	42.3233607427	443.3123862096
127.1565825891	42.3233607427	443.2494536980
127.1565949216	42.3233607427	443.1865211864
127.1566072541	42.3233607427	443.1235886748
127.1566195866	42.3233607427	443.0606561632
127.1566319191	42.3233607427	443.0073965511
127.1566442517	42.3233607427	442.9544939814
127.1566565842	42.3233607427	442.9015914118
127.1566689167	42.3233607427	442.8486888422
127.1566812492	42.3233607427	442.7957862725
127.1566935818	42.3233607427	442.7428837028
127.1567059143	42.3233607427	442.6899811332
127.1567182468	42.3233607427	442.6370785635
127.1567305793	42.3233607427	442.5841759939
127.1567429119	42.3233607427	442.5312734243
127.1567552444	42.3233607427	442.4783708546
127.1567675769	42.3233607427	442.4254682849
127.1567799094	42.3233607427	442.3725657153
127.1567922419	42.3233607427	442.3201688241
127.1568045745	42.3233607427	442.2785042732
127.1568169070	42.3233607427	442.2368397223
127.1568292395	42.3233607427	442.1951751714
127.1568415720	42.3233607427	442.1535106204
127.1568539046	42.3233607427	442.1118460696
127.1568662371	42.3233607427	442.0701815187
127.1568785696	42.3233607427	442.0285169275
127.1568909021	42.3233607427	441.9868519047
127.1569032346	42.3233607427	441.9451868819
127.1569155672	42.3233607427	441.9035218591
127.1569278997	42.3233607427	441.8618568363
127.1569402322	42.3233607427	441.8201918134
127.1569525647	42.3233607427	441.7785267906
127.1569648973	42.3233607427	441.7384247013
127.1569772298	42.3233607427	441.7092042206
127.1569895623	42.3233607427	441.6799837398
127.1570018948	42.3233607427	441.6507632591
127.1570142273	42.3233607427	441.6215427783
127.1570265599	42.3233607427	441.5923222976
127.1570388924	42.3233607427	441.5631018168
127.1570512249	42.3233607427	441.5338813361
127.1570635574	42.3233607427	441.5046608553
127.1570758900	42.3233607427	441.4754403745
127.1570882225	42.3233607427	441.4462198938
127.1571005550	42.3233607427	441.4169994130
127.1571128875	42.3233607427	441.3877789323
127.1571252200	42.3233607427	441.3585584515
127.1571375526	42.3233607427	441.3293386802
127.1571498851	42.3233607427	441.3001216406
127.1571622176	42.3233607427	441.2709046009
127.1571745501	42.3233607427	441.2416875612
127.1571868827	42.3233607427	441.2124705216
127.1571992152	42.3233607427	441.1832534819
127.1572115477	42.3233607427	441.1540364422
127.1572238802	42.3233607427	441.1248194025
127.1572362127	42.3233607427	441.0956023629
127.1572485453	42.3233607427	441.0663853232
127.1572608778	42.3233607427	441.0371682835
127.1572732103	42.3233607427	441.0079512438
127.1572855428	42.3233607427	440.9787342042
127.1572978754	42.3233607427	440.9495171645
127.1573102079	42.3233607427	440.9202990027
127.1573225404	42.3233607427	440.8910780500
127.1573348729	42.3233607427	440.8618570973
127.1573472054	42.3233607427	440.8326361447
127.1573595380	42.3233607427	440.8034151920
127.1573718705	42.3233607427	440.7741942394
127.1573842030	42.3233607427	440.7449732867
127.1573965355	42.3233607427	440.7157524884
127.1574088681	42.3233607427	440.6865320076
127.1574212006	42.3233607427	440.6573115269
127.1574335331	42.3233607427	440.6280910461
127.1574458656	42.3233607427	440.5988705653
127.1574581982	42.3233607427	440.5696500846
127.1574705307	42.3233607427	440.5404296038
127.1574828632	42.3233607427	440.5112105606
127.1574951957	42.3233607427	440.4819939928
127.1575075282	42.3233607427	440.4527774251
127.1575198608	42.3233607427	440.4235608573
127.1575321933	42.3233607427	440.3943442895
127.1575445258	42.3233607427	440.3651277218
127.1575568583	42.3233607427	440.3359111540
127.1575691909	42.3233607427	440.3066943939
127.1575815234	42.3233607427	440.2774773542
127.1575938559	42.3233607427	440.2482603145
127.1576061884	42.3233607427	440.2190432749
127.1576185209	42.3233607427	440.1898262352
127.1576308535	42.3233607427	440.1606091955
127.1576431860	42.3233607427	440.1313921558
127.1576555185	42.3233607427	440.1021733632
127.1576678510	42.3233607427	440.0729524106
127.1576801836	42.3233607427	440.0437314579
127.1576925161	42.3233607427	440.0145105053
127.1577048486	42.3233607427	439.9852895526
127.1577171811	42.3233607427	439.9560685999
127.1577295136	42.3233607427	439.9268476473
127.1577418462	42.3233607427	439.8976269250
127.1577541787	42.3233607427	439.8684064443
127.1577665112	42.3233607427	439.8391859635
127.1577788437	42.3233607427	439.8099654827
127.1577911763	42.3233607427	439.7807450020
127.1578035088	42.3233607427	439.7515245212
127.1578158413	42.3233607427	439.7223040405
127.1563852687	42.3233698813	444.0698340128
127.1563976012	42.3233698813	444.0069019731
127.1564099337	42.3233698813	443.9439699333
127.1564222663	42.3233698813	443.8810378937
127.1564345988	42.3233698813	443.8181058540
127.1564469313	42.3233698813	443.7551738142
127.1564592638	42.3233698813	443.6922417745
127.1564715964	42.3233698813	443.6293097348
127.1564839289	42.3233698813	443.5663776951
127.1564962614	42.3233698813	443.5034456554
[truncated: 5,372 more rows]
