# Supplementary material for: Simulation Study on Coverage Path Planning of Autonomous Tasks in Hilly Farmland Based on Energy Consumption Model
Source: Hindawi journal article supplement (doi:10.1155/2020/4535734), 2020-08-30
Supplement: f1 [file 4535734.f1.zip › 4535734.f1/Algorithm-pathplanning-matlab/2020.04.25/0202/2.csv]

Longitude	Latitude	Elevation
127.1564556321	42.3237811172	0.0000000000
127.1563852687	42.3236130549	0.0000000000
127.1565534823	42.3234017231	0.0000000000
127.1575399317	42.3232145255	0.0000000000
127.1578158413	42.3234338489	0.0000000000
127.1577426691	42.3235201846	0.0000000000
127.1576345423	42.3235575209	0.0000000000
127.1575912117	42.3236281105	0.0000000000
127.1568038924	42.3237395240	0.0000000000
127.1564556321	42.3237811172	0.0000000000
