# Supplementary material for: Simulation Study on Coverage Path Planning of Autonomous Tasks in Hilly Farmland Based on Energy Consumption Model
Source: Hindawi journal article supplement (doi:10.1155/2020/4535734), 2020-08-30
Supplement: f1 [file 4535734.f1.zip › 4535734.f1/Algorithm-pathplanning-matlab/2020.04.25/0303/1.csv]

Longitude	Latitude	Elevation
127.1558029939	42.3236261989	0.0000000000
127.1557456528	42.3235838314	0.0000000000
127.1556548574	42.3235644325	0.0000000000
127.1555842813	42.3235014221	0.0000000000
127.1555457358	42.3234117242	0.0000000000
127.1554290409	42.3233633774	0.0000000000
127.1559368862	42.3231446258	0.0000000000
127.1561402793	42.3234373560	0.0000000000
127.1561553765	42.3235370121	0.0000000000
127.1558029939	42.3236261989	0.0000000000
