# Supplementary material for: Simulation Study on Coverage Path Planning of Autonomous Tasks in Hilly Farmland Based on Energy Consumption Model
Source: Hindawi journal article supplement (doi:10.1155/2020/4535734), 2020-08-30
Supplement: f1 [file 4535734.f1.zip › 4535734.f1/Algorithm-pathplanning-matlab/2020.04.25/0303/2.csv]

Longitude	Latitude	Elevation
127.1554290409	42.3231446258	457.0597237423
127.1554415639	42.3231446258	456.9319153924
127.1554540870	42.3231446258	456.8041070427
127.1554666100	42.3231446258	456.6762986928
127.1554791330	42.3231446258	456.5484903431
127.1554916560	42.3231446258	456.4206819932
127.1555041791	42.3231446258	456.2928736435
127.1555167021	42.3231446258	456.1650680684
127.1555292251	42.3231446258	456.0372625041
127.1555417481	42.3231446258	455.9094569396
127.1555542712	42.3231446258	455.7816513753
127.1555667942	42.3231446258	455.6538458108
127.1555793172	42.3231446258	455.5260402465
127.1555918403	42.3231446258	455.3982338890
127.1556043633	42.3231446258	455.2704227538
127.1556168863	42.3231446258	455.1426116185
127.1556294093	42.3231446258	455.0148004832
127.1556419324	42.3231446258	454.8869893481
127.1556544554	42.3231446258	454.7591782128
127.1556669784	42.3231446258	454.6313670777
127.1556795015	42.3231446258	454.5035562650
127.1556920245	42.3231446258	454.3757462481
127.1557045475	42.3231446258	454.2479362310
127.1557170705	42.3231446258	454.1201262140
127.1557295936	42.3231446258	453.9923161969
127.1557421166	42.3231446258	453.8645061800
127.1557546396	42.3231446258	453.7366961629
127.1557671626	42.3231446258	453.6208034917
127.1557796857	42.3231446258	453.5203816143
127.1557922087	42.3231446258	453.4199597368
127.1558047317	42.3231446258	453.3195378595
127.1558172548	42.3231446258	453.2191159820
127.1558297778	42.3231446258	453.1186941047
127.1558423008	42.3231446258	453.0182722272
127.1558548238	42.3231446258	452.9178522868
127.1558673469	42.3231446258	452.8174337438
127.1558798699	42.3231446258	452.7170152009
127.1558923929	42.3231446258	452.6165966578
127.1559049159	42.3231446258	452.5161781149
127.1559174390	42.3231446258	452.4157595719
127.1559299620	42.3231446258	452.3153410290
127.1559424850	42.3231446258	452.2149200617
127.1559550081	42.3231446258	452.1144981843
127.1559675311	42.3231446258	452.0140763069
127.1559800541	42.3231446258	451.9136544294
127.1559925771	42.3231446258	451.8132325521
127.1560051002	42.3231446258	451.7128106746
127.1560176232	42.3231446258	451.6123887973
127.1560301462	42.3231446258	451.5119683757
127.1560426693	42.3231446258	451.4115481655
127.1560551923	42.3231446258	451.3111279553
127.1560677153	42.3231446258	451.2107077452
127.1560802383	42.3231446258	451.1102875349
127.1560927614	42.3231446258	451.0098673248
127.1561052844	42.3231446258	450.9095796920
127.1561178074	42.3231446258	450.8159950877
127.1561303304	42.3231446258	450.7224104832
127.1561428535	42.3231446258	450.6288258789
127.1561553765	42.3231446258	450.5352412744
127.1554290409	42.3231538868	456.8166816191
127.1554415639	42.3231538868	456.6888732692
127.1554540870	42.3231538868	456.5610649195
127.1554666100	42.3231538868	456.4332565696
127.1554791330	42.3231538868	456.3054482199
127.1554916560	42.3231538868	456.1776398700
127.1555041791	42.3231538868	456.0498315203
127.1555167021	42.3231538868	455.9220254666
127.1555292251	42.3231538868	455.7942194219
127.1555417481	42.3231538868	455.6664133770
127.1555542712	42.3231538868	455.5386073322
127.1555667942	42.3231538868	455.4108012873
127.1555793172	42.3231538868	455.2829952426
127.1555918403	42.3231538868	455.1551885414
127.1556043633	42.3231538868	455.0273778866
127.1556168863	42.3231538868	454.8995672318
127.1556294093	42.3231538868	454.7717565769
127.1556419324	42.3231538868	454.6439459222
127.1556544554	42.3231538868	454.5161352674
127.1556669784	42.3231538868	454.3883246127
127.1556795015	42.3231538868	454.2605140032
127.1556920245	42.3231538868	454.1327035058
127.1557045475	42.3231538868	454.0048930083
127.1557170705	42.3231538868	453.8770825109
127.1557295936	42.3231538868	453.7492720134
127.1557421166	42.3231538868	453.6214615160
127.1557546396	42.3231538868	453.4936510185
127.1557671626	42.3231538868	453.3777611597
127.1557796857	42.3231538868	453.2773388018
127.1557922087	42.3231538868	453.1769164439
127.1558047317	42.3231538868	453.0764940861
127.1558172548	42.3231538868	452.9760717282
127.1558297778	42.3231538868	452.8756493705
127.1558423008	42.3231538868	452.7752270126
127.1558548238	42.3231538868	452.6748071499
127.1558673469	42.3231538868	452.5743890873
127.1558798699	42.3231538868	452.4739710248
127.1558923929	42.3231538868	452.3735529622
127.1559049159	42.3231538868	452.2731348997
127.1559174390	42.3231538868	452.1727168372
127.1559299620	42.3231538868	452.0722987747
127.1559424850	42.3231538868	451.9718775892
127.1559550081	42.3231538868	451.8714552314
127.1559675311	42.3231538868	451.7710328735
127.1559800541	42.3231538868	451.6706105156
127.1559925771	42.3231538868	451.5701881578
127.1560051002	42.3231538868	451.4697658000
127.1560176232	42.3231538868	451.3693434422
127.1560301462	42.3231538868	451.2689229597
127.1560426693	42.3231538868	451.1685027495
127.1560551923	42.3231538868	451.0680825393
127.1560677153	42.3231538868	450.9676623292
127.1560802383	42.3231538868	450.8672421189
127.1560927614	42.3231538868	450.7668219088
127.1561052844	42.3231538868	450.6665724801
127.1561178074	42.3231538868	450.5749576522
127.1561303304	42.3231538868	450.4833428242
127.1561428535	42.3231538868	450.3917279963
127.1561553765	42.3231538868	450.3001131683
127.1554290409	42.3231631478	456.5736394959
127.1554415639	42.3231631478	456.4458311460
127.1554540870	42.3231631478	456.3180227963
127.1554666100	42.3231631478	456.1902144464
127.1554791330	42.3231631478	456.0624060967
127.1554916560	42.3231631478	455.9345977468
127.1555041791	42.3231631478	455.8067893971
127.1555167021	42.3231631478	455.6789828648
127.1555292251	42.3231631478	455.5511763396
127.1555417481	42.3231631478	455.4233698143
127.1555542712	42.3231631478	455.2955632891
127.1555667942	42.3231631478	455.1677567638
127.1555793172	42.3231631478	455.0399502386
127.1555918403	42.3231631478	454.9121431938
127.1556043633	42.3231631478	454.7843330195
127.1556168863	42.3231631478	454.6565228451
127.1556294093	42.3231631478	454.5287126706
127.1556419324	42.3231631478	454.4009024964
127.1556544554	42.3231631478	454.2730923220
127.1556669784	42.3231631478	454.1452821477
127.1556795015	42.3231631478	454.0174717414
127.1556920245	42.3231631478	453.8896607636
127.1557045475	42.3231631478	453.7618497856
127.1557170705	42.3231631478	453.6340388078
127.1557295936	42.3231631478	453.5062278298
127.1557421166	42.3231631478	453.3784168520
127.1557546396	42.3231631478	453.2506058741
127.1557671626	42.3231631478	453.1347188277
127.1557796857	42.3231631478	453.0342959893
127.1557922087	42.3231631478	452.9338731510
127.1558047317	42.3231631478	452.8334503128
127.1558172548	42.3231631478	452.7330274745
127.1558297778	42.3231631478	452.6326046363
127.1558423008	42.3231631478	452.5321817979
127.1558548238	42.3231631478	452.4317620129
127.1558673469	42.3231631478	452.3313444308
127.1558798699	42.3231631478	452.2309268487
127.1558923929	42.3231631478	452.1305092666
127.1559049159	42.3231631478	452.0300916846
127.1559174390	42.3231631478	451.9296741024
127.1559299620	42.3231631478	451.8292565204
127.1559424850	42.3231631478	451.7288351167
127.1559550081	42.3231631478	451.6284122785
127.1559675311	42.3231631478	451.5279894402
127.1559800541	42.3231631478	451.4275666018
127.1559925771	42.3231631478	451.3271437636
127.1560051002	42.3231631478	451.2267209253
127.1560176232	42.3231631478	451.1262980871
127.1560301462	42.3231631478	451.0258775437
127.1560426693	42.3231631478	450.9254573335
127.1560551923	42.3231631478	450.8250371233
127.1560677153	42.3231631478	450.7246169132
127.1560802383	42.3231631478	450.6241967029
127.1560927614	42.3231631478	450.5237764928
127.1561052844	42.3231631478	450.4235652682
127.1561178074	42.3231631478	450.3339202167
127.1561303304	42.3231631478	450.2442751652
127.1561428535	42.3231631478	450.1546301138
127.1561553765	42.3231631478	450.0649850622
127.1554290409	42.3231724089	456.3305973729
127.1554415639	42.3231724089	456.2027890230
127.1554540870	42.3231724089	456.0749806733
127.1554666100	42.3231724089	455.9471723234
127.1554791330	42.3231724089	455.8193639737
127.1554916560	42.3231724089	455.6915556238
127.1555041791	42.3231724089	455.5637472741
127.1555167021	42.3231724089	455.4359402632
127.1555292251	42.3231724089	455.3081332576
127.1555417481	42.3231724089	455.1803262518
127.1555542712	42.3231724089	455.0525192462
127.1555667942	42.3231724089	454.9247122404
127.1555793172	42.3231724089	454.7969052348
127.1555918403	42.3231724089	454.6690978463
127.1556043633	42.3231724089	454.5412881525
127.1556168863	42.3231724089	454.4134784585
127.1556294093	42.3231724089	454.2856687645
127.1556419324	42.3231724089	454.1578590707
127.1556544554	42.3231724089	454.0300493767
127.1556669784	42.3231724089	453.9022396829
127.1556795015	42.3231724089	453.7744294798
127.1556920245	42.3231724089	453.6466180215
127.1557045475	42.3231724089	453.5188065631
127.1557170705	42.3231724089	453.3909951049
127.1557295936	42.3231724089	453.2631836465
127.1557421166	42.3231724089	453.1353721882
127.1557546396	42.3231724089	453.0075607298
127.1557671626	42.3231724089	452.8916764958
127.1557796857	42.3231724089	452.7912531771
127.1557922087	42.3231724089	452.6908298583
127.1558047317	42.3231724089	452.5904065396
127.1558172548	42.3231724089	452.4899832209
127.1558297778	42.3231724089	452.3895599022
127.1558423008	42.3231724089	452.2891365835
127.1558548238	42.3231724089	452.1887168762
127.1558673469	42.3231724089	452.0882997745
127.1558798699	42.3231724089	451.9878826729
127.1558923929	42.3231724089	451.8874655712
127.1559049159	42.3231724089	451.7870484696
127.1559174390	42.3231724089	451.6866313678
127.1559299620	42.3231724089	451.5862142662
127.1559424850	42.3231724089	451.4857926444
127.1559550081	42.3231724089	451.3853693257
127.1559675311	42.3231724089	451.2849460070
127.1559800541	42.3231724089	451.1845226882
127.1559925771	42.3231724089	451.0840993696
127.1560051002	42.3231724089	450.9836760508
127.1560176232	42.3231724089	450.8832527322
127.1560301462	42.3231724089	450.7828321279
127.1560426693	42.3231724089	450.6824119177
127.1560551923	42.3231724089	450.5819917075
127.1560677153	42.3231724089	450.4815714974
127.1560802383	42.3231724089	450.3811512871
127.1560927614	42.3231724089	450.2807310770
127.1561052844	42.3231724089	450.1805580564
127.1561178074	42.3231724089	450.0928827815
127.1561303304	42.3231724089	450.0052075064
127.1561428535	42.3231724089	449.9175322314
127.1561553765	42.3231724089	449.8298569563
127.1554290409	42.3231816699	456.0875552497
127.1554415639	42.3231816699	455.9597468998
127.1554540870	42.3231816699	455.8319385501
127.1554666100	42.3231816699	455.7041302002
127.1554791330	42.3231816699	455.5763218505
127.1554916560	42.3231816699	455.4485135006
127.1555041791	42.3231816699	455.3207051509
127.1555167021	42.3231816699	455.1928976614
127.1555292251	42.3231816699	455.0650901754
127.1555417481	42.3231816699	454.9372826892
127.1555542712	42.3231816699	454.8094752031
127.1555667942	42.3231816699	454.6816677169
127.1555793172	42.3231816699	454.5538602309
127.1555918403	42.3231816699	454.4260524987
127.1556043633	42.3231816699	454.2982432853
127.1556168863	42.3231816699	454.1704340718
127.1556294093	42.3231816699	454.0426248582
127.1556419324	42.3231816699	453.9148156448
127.1556544554	42.3231816699	453.7870064313
127.1556669784	42.3231816699	453.6591972179
127.1556795015	42.3231816699	453.5313872180
127.1556920245	42.3231816699	453.4035752793
127.1557045475	42.3231816699	453.2757633405
127.1557170705	42.3231816699	453.1479514018
127.1557295936	42.3231816699	453.0201394629
127.1557421166	42.3231816699	452.8923275243
127.1557546396	42.3231816699	452.7645155854
127.1557671626	42.3231816699	452.6486341638
127.1557796857	42.3231816699	452.5482103646
127.1557922087	42.3231816699	452.4477865654
127.1558047317	42.3231816699	452.3473627663
127.1558172548	42.3231816699	452.2469389671
127.1558297778	42.3231816699	452.1465151680
127.1558423008	42.3231816699	452.0460913688
127.1558548238	42.3231816699	451.9456717393
127.1558673469	42.3231816699	451.8452551180
127.1558798699	42.3231816699	451.7448384968
127.1558923929	42.3231816699	451.6444218755
127.1559049159	42.3231816699	451.5440052544
127.1559174390	42.3231816699	451.4435886331
127.1559299620	42.3231816699	451.3431720119
127.1559424850	42.3231816699	451.2427501719
127.1559550081	42.3231816699	451.1423263728
127.1559675311	42.3231816699	451.0419025736
127.1559800541	42.3231816699	450.9414787744
127.1559925771	42.3231816699	450.8410549754
127.1560051002	42.3231816699	450.7406311762
127.1560176232	42.3231816699	450.6402073771
127.1560301462	42.3231816699	450.5397867119
127.1560426693	42.3231816699	450.4393665017
127.1560551923	42.3231816699	450.3389462915
127.1560677153	42.3231816699	450.2385260814
127.1560802383	42.3231816699	450.1381058711
127.1560927614	42.3231816699	450.0376856610
127.1561052844	42.3231816699	449.9375508445
127.1561178074	42.3231816699	449.8518453460
127.1561303304	42.3231816699	449.7661398474
127.1561428535	42.3231816699	449.6804343488
127.1561553765	42.3231816699	449.5947288502
127.1554290409	42.3231909309	455.8445131265
127.1554415639	42.3231909309	455.7167047766
127.1554540870	42.3231909309	455.5888964269
127.1554666100	42.3231909309	455.4610880770
127.1554791330	42.3231909309	455.3332797273
127.1554916560	42.3231909309	455.2054713774
127.1555041791	42.3231909309	455.0776630277
127.1555167021	42.3231909309	454.9498550596
127.1555292251	42.3231909309	454.8220470931
127.1555417481	42.3231909309	454.6942391265
127.1555542712	42.3231909309	454.5664311600
127.1555667942	42.3231909309	454.4386231934
127.1555793172	42.3231909309	454.3108152269
127.1555918403	42.3231909309	454.1830071511
127.1556043633	42.3231909309	454.0551984182
127.1556168863	42.3231909309	453.9273896851
127.1556294093	42.3231909309	453.7995809519
127.1556419324	42.3231909309	453.6717722190
127.1556544554	42.3231909309	453.5439634858
127.1556669784	42.3231909309	453.4161547529
127.1556795015	42.3231909309	453.2883449562
127.1556920245	42.3231909309	453.1605325370
127.1557045475	42.3231909309	453.0327201178
127.1557170705	42.3231909309	452.9049076987
127.1557295936	42.3231909309	452.7770952794
127.1557421166	42.3231909309	452.6492828603
127.1557546396	42.3231909309	452.5214704410
127.1557671626	42.3231909309	452.4055918317
127.1557796857	42.3231909309	452.3051675521
127.1557922087	42.3231909309	452.2047432725
127.1558047317	42.3231909309	452.1043189930
127.1558172548	42.3231909309	452.0038947133
127.1558297778	42.3231909309	451.9034704338
127.1558423008	42.3231909309	451.8030461542
127.1558548238	42.3231909309	451.7026266024
127.1558673469	42.3231909309	451.6022104615
127.1558798699	42.3231909309	451.5017943208
127.1558923929	42.3231909309	451.4013781799
127.1559049159	42.3231909309	451.3009620392
127.1559174390	42.3231909309	451.2005458983
127.1559299620	42.3231909309	451.1001297576
127.1559424850	42.3231909309	450.9997076994
127.1559550081	42.3231909309	450.8992834199
127.1559675311	42.3231909309	450.7988591403
127.1559800541	42.3231909309	450.6984348606
127.1559925771	42.3231909309	450.5980105811
127.1560051002	42.3231909309	450.4975863015
127.1560176232	42.3231909309	450.3971620220
127.1560301462	42.3231909309	450.2967412959
127.1560426693	42.3231909309	450.1963210857
127.1560551923	42.3231909309	450.0959008755
127.1560677153	42.3231909309	449.9954806654
127.1560802383	42.3231909309	449.8950604551
127.1560927614	42.3231909309	449.7946402450
127.1561052844	42.3231909309	449.6945436326
127.1561178074	42.3231909309	449.6108079105
127.1561303304	42.3231909309	449.5270721884
127.1561428535	42.3231909309	449.4433364663
127.1561553765	42.3231909309	449.3596007441
127.1554290409	42.3232001919	455.6014710033
127.1554415639	42.3232001919	455.4736626534
127.1554540870	42.3232001919	455.3458543037
127.1554666100	42.3232001919	455.2180459538
127.1554791330	42.3232001919	455.0902376041
127.1554916560	42.3232001919	454.9624292542
127.1555041791	42.3232001919	454.8346209045
127.1555167021	42.3232001919	454.7068124578
127.1555292251	42.3232001919	454.5790040109
127.1555417481	42.3232001919	454.4511955638
127.1555542712	42.3232001919	454.3233871169
127.1555667942	42.3232001919	454.1955786699
127.1555793172	42.3232001919	454.0677702229
127.1555918403	42.3232001919	453.9399617759
127.1556043633	42.3232001919	453.8121533290
127.1556168863	42.3232001919	453.6843448819
127.1556294093	42.3232001919	453.5565364348
127.1556419324	42.3232001919	453.4287279879
127.1556544554	42.3232001919	453.3009195409
127.1556669784	42.3232001919	453.1731110939
127.1556795015	42.3232001919	453.0453014182
127.1556920245	42.3232001919	452.9174887130
127.1557045475	42.3232001919	452.7896760077
127.1557170705	42.3232001919	452.6618633025
127.1557295936	42.3232001919	452.5340505972
127.1557421166	42.3232001919	452.4062378920
127.1557546396	42.3232001919	452.2784251867
127.1557671626	42.3232001919	452.1625489181
127.1557796857	42.3232001919	452.0621243524
127.1557922087	42.3232001919	451.9616997867
127.1558047317	42.3232001919	451.8612752211
127.1558172548	42.3232001919	451.7608506555
127.1558297778	42.3232001919	451.6604260899
127.1558423008	42.3232001919	451.5600015242
127.1558548238	42.3232001919	451.4595820186
127.1558673469	42.3232001919	451.3591661638
127.1558798699	42.3232001919	451.2587503092
127.1558923929	42.3232001919	451.1583344544
127.1559049159	42.3232001919	451.0579185997
127.1559174390	42.3232001919	450.9575027449
127.1559299620	42.3232001919	450.8570868902
127.1559424850	42.3232001919	450.7566647021
127.1559550081	42.3232001919	450.6562401366
127.1559675311	42.3232001919	450.5558155709
127.1559800541	42.3232001919	450.4553910052
127.1559925771	42.3232001919	450.3549664396
127.1560051002	42.3232001919	450.2545418739
127.1560176232	42.3232001919	450.1541173084
127.1560301462	42.3232001919	450.0536964611
127.1560426693	42.3232001919	449.9532761538
127.1560551923	42.3232001919	449.8528558464
127.1560677153	42.3232001919	449.7524355391
127.1560802383	42.3232001919	449.6520152316
127.1560927614	42.3232001919	449.5515949243
127.1561052844	42.3232001919	449.4515364225
127.1561178074	42.3232001919	449.3697705741
127.1561303304	42.3232001919	449.2880047256
127.1561428535	42.3232001919	449.2062388772
127.1561553765	42.3232001919	449.1244730287
127.1554290409	42.3232094529	455.3584288801
127.1554415639	42.3232094529	455.2306205303
127.1554540870	42.3232094529	455.1028121805
127.1554666100	42.3232094529	454.9750038306
127.1554791330	42.3232094529	454.8471954809
127.1554916560	42.3232094529	454.7193871310
127.1555041791	42.3232094529	454.5915787813
127.1555167021	42.3232094529	454.4637698560
127.1555292251	42.3232094529	454.3359609287
127.1555417481	42.3232094529	454.2081520012
127.1555542712	42.3232094529	454.0803430738
127.1555667942	42.3232094529	453.9525341463
127.1555793172	42.3232094529	453.8247252190
127.1555918403	42.3232094529	453.6969162915
127.1556043633	42.3232094529	453.5691073641
127.1556168863	42.3232094529	453.4412984366
127.1556294093	42.3232094529	453.3134895091
127.1556419324	42.3232094529	453.1856805818
127.1556544554	42.3232094529	453.0578716543
127.1556669784	42.3232094529	452.9300627269
127.1556795015	42.3232094529	452.8022528480
127.1556920245	42.3232094529	452.6744406233
127.1557045475	42.3232094529	452.5466283984
127.1557170705	42.3232094529	452.4188161737
127.1557295936	42.3232094529	452.2910039488
127.1557421166	42.3232094529	452.1631917240
127.1557546396	42.3232094529	452.0353794991
127.1557671626	42.3232094529	451.9195037109
127.1557796857	42.3232094529	451.8190796257
127.1557922087	42.3232094529	451.7186555404
127.1558047317	42.3232094529	451.6182314553
127.1558172548	42.3232094529	451.5178073700
127.1558297778	42.3232094529	451.4173832849
127.1558423008	42.3232094529	451.3169591997
127.1558548238	42.3232094529	451.2165396164
127.1558673469	42.3232094529	451.1161232811
127.1558798699	42.3232094529	451.0157069460
127.1558923929	42.3232094529	450.9152906108
127.1559049159	42.3232094529	450.8148742757
127.1559174390	42.3232094529	450.7144579405
127.1559299620	42.3232094529	450.6140416053
127.1559424850	42.3232094529	450.5136196354
127.1559550081	42.3232094529	450.4131955503
127.1559675311	42.3232094529	450.3127714651
127.1559800541	42.3232094529	450.2123473798
127.1559925771	42.3232094529	450.1119232947
127.1560051002	42.3232094529	450.0114992094
127.1560176232	42.3232094529	449.9110751243
127.1560301462	42.3232094529	449.8106539184
127.1560426693	42.3232094529	449.7102331306
127.1560551923	42.3232094529	449.6098123428
127.1560677153	42.3232094529	449.5093915550
127.1560802383	42.3232094529	449.4089707672
127.1560927614	42.3232094529	449.3085499794
127.1561052844	42.3232094529	449.2085292199
127.1561178074	42.3232094529	449.1287336284
127.1561303304	42.3232094529	449.0489380368
127.1561428535	42.3232094529	448.9691424453
127.1561553765	42.3232094529	448.8893468536
127.1554290409	42.3232187140	455.1153867571
127.1554415639	42.3232187140	454.9875784072
127.1554540870	42.3232187140	454.8597700575
127.1554666100	42.3232187140	454.7319617076
127.1554791330	42.3232187140	454.6041533579
127.1554916560	42.3232187140	454.4763450080
127.1555041791	42.3232187140	454.3485366583
127.1555167021	42.3232187140	454.2207272544
127.1555292251	42.3232187140	454.0929178466
127.1555417481	42.3232187140	453.9651084387
127.1555542712	42.3232187140	453.8372990309
127.1555667942	42.3232187140	453.7094896230
127.1555793172	42.3232187140	453.5816802152
127.1555918403	42.3232187140	453.4538708073
127.1556043633	42.3232187140	453.3260613995
127.1556168863	42.3232187140	453.1982519916
127.1556294093	42.3232187140	453.0704425836
127.1556419324	42.3232187140	452.9426331758
127.1556544554	42.3232187140	452.8148237679
127.1556669784	42.3232187140	452.6870143601
127.1556795015	42.3232187140	452.5592042780
127.1556920245	42.3232187140	452.4313925337
127.1557045475	42.3232187140	452.3035807893
127.1557170705	42.3232187140	452.1757690450
127.1557295936	42.3232187140	452.0479573005
127.1557421166	42.3232187140	451.9201455562
127.1557546396	42.3232187140	451.7923338117
127.1557671626	42.3232187140	451.6764585040
127.1557796857	42.3232187140	451.5760348992
127.1557922087	42.3232187140	451.4756112943
127.1558047317	42.3232187140	451.3751876896
127.1558172548	42.3232187140	451.2747640848
127.1558297778	42.3232187140	451.1743404801
127.1558423008	42.3232187140	451.0739168753
127.1558548238	42.3232187140	450.9734972143
127.1558673469	42.3232187140	450.8730803986
127.1558798699	42.3232187140	450.7726635831
127.1558923929	42.3232187140	450.6722467674
127.1559049159	42.3232187140	450.5718299519
127.1559174390	42.3232187140	450.4714131362
127.1559299620	42.3232187140	450.3709963207
127.1559424850	42.3232187140	450.2705745689
127.1559550081	42.3232187140	450.1701509642
127.1559675311	42.3232187140	450.0697273594
127.1559800541	42.3232187140	449.9693037546
127.1559925771	42.3232187140	449.8688801499
127.1560051002	42.3232187140	449.7684565451
127.1560176232	42.3232187140	449.6680329404
127.1560301462	42.3232187140	449.5676113759
127.1560426693	42.3232187140	449.4671901077
127.1560551923	42.3232187140	449.3667688394
127.1560677153	42.3232187140	449.2663475712
127.1560802383	42.3232187140	449.1659263029
127.1560927614	42.3232187140	449.0655050347
127.1561052844	42.3232187140	448.9655220175
127.1561178074	42.3232187140	448.8876966829
127.1561303304	42.3232187140	448.8098713481
127.1561428535	42.3232187140	448.7320460135
127.1561553765	42.3232187140	448.6542206788
127.1554290409	42.3232279750	454.8723446339
127.1554415639	42.3232279750	454.7445362841
127.1554540870	42.3232279750	454.6167279343
127.1554666100	42.3232279750	454.4889195845
127.1554791330	42.3232279750	454.3611112347
127.1554916560	42.3232279750	454.2333028849
127.1555041791	42.3232279750	454.1054945351
127.1555167021	42.3232279750	453.9776846526
127.1555292251	42.3232279750	453.8498747644
127.1555417481	42.3232279750	453.7220648760
127.1555542712	42.3232279750	453.5942549878
127.1555667942	42.3232279750	453.4664450995
127.1555793172	42.3232279750	453.3386352112
127.1555918403	42.3232279750	453.2108253229
127.1556043633	42.3232279750	453.0830154347
127.1556168863	42.3232279750	452.9552055463
127.1556294093	42.3232279750	452.8273956579
127.1556419324	42.3232279750	452.6995857697
127.1556544554	42.3232279750	452.5717758813
127.1556669784	42.3232279750	452.4439659931
127.1556795015	42.3232279750	452.3161557078
127.1556920245	42.3232279750	452.1883444440
127.1557045475	42.3232279750	452.0605331799
127.1557170705	42.3232279750	451.9327219161
127.1557295936	42.3232279750	451.8049106521
127.1557421166	42.3232279750	451.6770993882
127.1557546396	42.3232279750	451.5492881242
127.1557671626	42.3232279750	451.4334132968
127.1557796857	42.3232279750	451.3329901724
127.1557922087	42.3232279750	451.2325670481
127.1558047317	42.3232279750	451.1321439238
127.1558172548	42.3232279750	451.0317207994
127.1558297778	42.3232279750	450.9312976751
127.1558423008	42.3232279750	450.8308745508
127.1558548238	42.3232279750	450.7304548120
127.1558673469	42.3232279750	450.6300375159
127.1558798699	42.3232279750	450.5296202200
127.1558923929	42.3232279750	450.4292029239
127.1559049159	42.3232279750	450.3287856279
127.1559174390	42.3232279750	450.2283683318
127.1559299620	42.3232279750	450.1279510358
127.1559424850	42.3232279750	450.0275295022
127.1559550081	42.3232279750	449.9271063780
127.1559675311	42.3232279750	449.8266832536
127.1559800541	42.3232279750	449.7262601292
127.1559925771	42.3232279750	449.6258370049
127.1560051002	42.3232279750	449.5254138805
127.1560176232	42.3232279750	449.4249907563
127.1560301462	42.3232279750	449.3245688331
127.1560426693	42.3232279750	449.2241470845
127.1560551923	42.3232279750	449.1237253358
127.1560677153	42.3232279750	449.0233035872
127.1560802383	42.3232279750	448.9228818385
127.1560927614	42.3232279750	448.8224600898
127.1561052844	42.3232279750	448.7225148149
127.1561178074	42.3232279750	448.6466597372
127.1561303304	42.3232279750	448.5708046593
127.1561428535	42.3232279750	448.4949495816
127.1561553765	42.3232279750	448.4190945038
127.1554290409	42.3232372360	454.6293025107
127.1554415639	42.3232372360	454.5014941609
127.1554540870	42.3232372360	454.3736858111
127.1554666100	42.3232372360	454.2458774613
127.1554791330	42.3232372360	454.1180691115
127.1554916560	42.3232372360	453.9902607617
127.1555041791	42.3232372360	453.8624524119
127.1555167021	42.3232372360	453.7346420508
127.1555292251	42.3232372360	453.6068316822
127.1555417481	42.3232372360	453.4790213134
127.1555542712	42.3232372360	453.3512109447
127.1555667942	42.3232372360	453.2234005759
127.1555793172	42.3232372360	453.0955902073
127.1555918403	42.3232372360	452.9677798385
127.1556043633	42.3232372360	452.8399694698
127.1556168863	42.3232372360	452.7121591010
127.1556294093	42.3232372360	452.5843487322
127.1556419324	42.3232372360	452.4565383636
127.1556544554	42.3232372360	452.3287279948
127.1556669784	42.3232372360	452.2009176261
127.1556795015	42.3232372360	452.0731071377
127.1556920245	42.3232372360	451.9452963542
127.1557045475	42.3232372360	451.8174855706
127.1557170705	42.3232372360	451.6896747872
127.1557295936	42.3232372360	451.5618640036
127.1557421166	42.3232372360	451.4340532202
127.1557546396	42.3232372360	451.3062424366
127.1557671626	42.3232372360	451.1903680897
127.1557796857	42.3232372360	451.0899454457
127.1557922087	42.3232372360	450.9895228018
127.1558047317	42.3232372360	450.8891001579
127.1558172548	42.3232372360	450.7886775140
127.1558297778	42.3232372360	450.6882548702
127.1558423008	42.3232372360	450.5878322262
127.1558548238	42.3232372360	450.4874124098
127.1558673469	42.3232372360	450.3869946332
127.1558798699	42.3232372360	450.2865768568
127.1558923929	42.3232372360	450.1861590803
127.1559049159	42.3232372360	450.0857413039
127.1559174390	42.3232372360	449.9853235273
127.1559299620	42.3232372360	449.8849057509
127.1559424850	42.3232372360	449.7844844355
127.1559550081	42.3232372360	449.6840617917
127.1559675311	42.3232372360	449.5836391477
127.1559800541	42.3232372360	449.4832165038
127.1559925771	42.3232372360	449.3827938600
127.1560051002	42.3232372360	449.2823712160
127.1560176232	42.3232372360	449.1819485722
127.1560301462	42.3232372360	449.0815262904
127.1560426693	42.3232372360	448.9811040614
127.1560551923	42.3232372360	448.8806818322
127.1560677153	42.3232372360	448.7802596032
127.1560802383	42.3232372360	448.6798373740
127.1560927614	42.3232372360	448.5794151450
127.1561052844	42.3232372360	448.4795076123
127.1561178074	42.3232372360	448.4056227914
127.1561303304	42.3232372360	448.3317379705
127.1561428535	42.3232372360	448.2578531497
127.1561553765	42.3232372360	448.1839683287
127.1554290409	42.3232464970	454.3862603876
127.1554415639	42.3232464970	454.2584520377
127.1554540870	42.3232464970	454.1306436879
127.1554666100	42.3232464970	454.0028353381
127.1554791330	42.3232464970	453.8750269883
127.1554916560	42.3232464970	453.7472186385
127.1555041791	42.3232464970	453.6194102887
127.1555167021	42.3232464970	453.4915994490
127.1555292251	42.3232464970	453.3637885999
127.1555417481	42.3232464970	453.2359777507
127.1555542712	42.3232464970	453.1081669016
127.1555667942	42.3232464970	452.9803560524
127.1555793172	42.3232464970	452.8525452033
127.1555918403	42.3232464970	452.7247343541
127.1556043633	42.3232464970	452.5969235050
127.1556168863	42.3232464970	452.4691126558
127.1556294093	42.3232464970	452.3413018065
127.1556419324	42.3232464970	452.2134909575
127.1556544554	42.3232464970	452.0856801082
127.1556669784	42.3232464970	451.9578692591
127.1556795015	42.3232464970	451.8300585675
127.1556920245	42.3232464970	451.7022482645
127.1557045475	42.3232464970	451.5744379613
127.1557170705	42.3232464970	451.4466276583
127.1557295936	42.3232464970	451.3188173552
127.1557421166	42.3232464970	451.1910070522
127.1557546396	42.3232464970	451.0631967490
127.1557671626	42.3232464970	450.9473228825
127.1557796857	42.3232464970	450.8469007190
127.1557922087	42.3232464970	450.7464785555
127.1558047317	42.3232464970	450.6460563921
127.1558172548	42.3232464970	450.5456342286
127.1558297778	42.3232464970	450.4452120652
127.1558423008	42.3232464970	450.3447899017
127.1558548238	42.3232464970	450.2443700075
127.1558673469	42.3232464970	450.1439517505
127.1558798699	42.3232464970	450.0435334937
127.1558923929	42.3232464970	449.9431152367
127.1559049159	42.3232464970	449.8426969799
127.1559174390	42.3232464970	449.7422787229
127.1559299620	42.3232464970	449.6418604661
127.1559424850	42.3232464970	449.5414393688
127.1559550081	42.3232464970	449.4410172054
127.1559675311	42.3232464970	449.3405950419
127.1559800541	42.3232464970	449.2401728784
127.1559925771	42.3232464970	449.1397507150
127.1560051002	42.3232464970	449.0393285515
127.1560176232	42.3232464970	448.9389063881
127.1560301462	42.3232464970	448.8384837477
127.1560426693	42.3232464970	448.7380610382
127.1560551923	42.3232464970	448.6376383286
127.1560677153	42.3232464970	448.5372156192
127.1560802383	42.3232464970	448.4367929096
127.1560927614	42.3232464970	448.3363702001
127.1561052844	42.3232464970	448.2365004097
127.1561178074	42.3232464970	448.1645858457
127.1561303304	42.3232464970	448.0926712817
127.1561428535	42.3232464970	448.0207567177
127.1561553765	42.3232464970	447.9488421537
127.1554290409	42.3232557581	454.1432182644
127.1554415639	42.3232557581	454.0154099145
127.1554540870	42.3232557581	453.8876015648
127.1554666100	42.3232557581	453.7597932149
127.1554791330	42.3232557581	453.6319848652
127.1554916560	42.3232557581	453.5041765153
127.1555041791	42.3232557581	453.3763681656
127.1555167021	42.3232557581	453.2485568472
127.1555292251	42.3232557581	453.1207455177
127.1555417481	42.3232557581	452.9929341880
127.1555542712	42.3232557581	452.8651228585
127.1555667942	42.3232557581	452.7373115289
127.1555793172	42.3232557581	452.6095001993
127.1555918403	42.3232557581	452.4816888697
127.1556043633	42.3232557581	452.3538775402
127.1556168863	42.3232557581	452.2260662105
127.1556294093	42.3232557581	452.0982548808
127.1556419324	42.3232557581	451.9704435513
127.1556544554	42.3232557581	451.8426322217
127.1556669784	42.3232557581	451.7148208921
127.1556795015	42.3232557581	451.5870099973
127.1556920245	42.3232557581	451.4592001747
127.1557045475	42.3232557581	451.3313903520
127.1557170705	42.3232557581	451.2035805294
127.1557295936	42.3232557581	451.0757707067
127.1557421166	42.3232557581	450.9479608841
127.1557546396	42.3232557581	450.8201510614
127.1557671626	42.3232557581	450.7042776754
127.1557796857	42.3232557581	450.6038559923
127.1557922087	42.3232557581	450.5034343092
127.1558047317	42.3232557581	450.4030126262
127.1558172548	42.3232557581	450.3025909432
127.1558297778	42.3232557581	450.2021692602
127.1558423008	42.3232557581	450.1017475771
127.1558548238	42.3232557581	450.0013276052
127.1558673469	42.3232557581	449.9009088678
127.1558798699	42.3232557581	449.8004901306
127.1558923929	42.3232557581	449.7000713932
127.1559049159	42.3232557581	449.5996526559
127.1559174390	42.3232557581	449.4992339185
127.1559299620	42.3232557581	449.3988151812
127.1559424850	42.3232557581	449.2983943021
127.1559550081	42.3232557581	449.1979726192
127.1559675311	42.3232557581	449.0975509361
127.1559800541	42.3232557581	448.9971292530
127.1559925771	42.3232557581	448.8967075700
127.1560051002	42.3232557581	448.7962858870
127.1560176232	42.3232557581	448.6958642040
127.1560301462	42.3232557581	448.5954412050
127.1560426693	42.3232557581	448.4950180151
127.1560551923	42.3232557581	448.3945948251
127.1560677153	42.3232557581	448.2941716351
127.1560802383	42.3232557581	448.1937484451
127.1560927614	42.3232557581	448.0933252552
127.1561052844	42.3232557581	447.9934932071
127.1561178074	42.3232557581	447.9235489000
127.1561303304	42.3232557581	447.8536045929
127.1561428535	42.3232557581	447.7836602858
127.1561553765	42.3232557581	447.7137159786
127.1554290409	42.3232650191	453.9001761414
127.1554415639	42.3232650191	453.7723677915
127.1554540870	42.3232650191	453.6445594418
127.1554666100	42.3232650191	453.5167510919
127.1554791330	42.3232650191	453.3889427422
127.1554916560	42.3232650191	453.2611343923
127.1555041791	42.3232650191	453.1333260426
127.1555167021	42.3232650191	453.0055142456
127.1555292251	42.3232650191	452.8777024357
127.1555417481	42.3232650191	452.7498906256
127.1555542712	42.3232650191	452.6220788156
127.1555667942	42.3232650191	452.4942670055
127.1555793172	42.3232650191	452.3664551956
127.1555918403	42.3232650191	452.2386433855
127.1556043633	42.3232650191	452.1108315755
127.1556168863	42.3232650191	451.9830197654
127.1556294093	42.3232650191	451.8552079553
127.1556419324	42.3232650191	451.7273961454
127.1556544554	42.3232650191	451.5995843353
127.1556669784	42.3232650191	451.4717725253
127.1556795015	42.3232650191	451.3439614273
127.1556920245	42.3232650191	451.2161520852
127.1557045475	42.3232650191	451.0883427429
127.1557170705	42.3232650191	450.9605334007
127.1557295936	42.3232650191	450.8327240585
127.1557421166	42.3232650191	450.7049147163
127.1557546396	42.3232650191	450.5771053740
127.1557671626	42.3232650191	450.4612324684
127.1557796857	42.3232650191	450.3608112658
127.1557922087	42.3232650191	450.2603900631
127.1558047317	42.3232650191	450.1599688606
127.1558172548	42.3232650191	450.0595476579
127.1558297778	42.3232650191	449.9591264554
127.1558423008	42.3232650191	449.8587052527
127.1558548238	42.3232650191	449.7582852032
127.1558673469	42.3232650191	449.6578659853
127.1558798699	42.3232650191	449.5574467676
127.1558923929	42.3232650191	449.4570275498
127.1559049159	42.3232650191	449.3566083321
127.1559174390	42.3232650191	449.2561891142
127.1559299620	42.3232650191	449.1557698965
127.1559424850	42.3232650191	449.0553492356
127.1559550081	42.3232650191	448.9549280331
127.1559675311	42.3232650191	448.8545068304
127.1559800541	42.3232650191	448.7540856278
127.1559925771	42.3232650191	448.6536644253
127.1560051002	42.3232650191	448.5532432226
127.1560176232	42.3232650191	448.4528220201
127.1560301462	42.3232650191	448.3523986625
127.1560426693	42.3232650191	448.2519749921
127.1560551923	42.3232650191	448.1515513217
127.1560677153	42.3232650191	448.0511276513
127.1560802383	42.3232650191	447.9507039809
127.1560927614	42.3232650191	447.8502803105
127.1561052844	42.3232650191	447.7504860046
127.1561178074	42.3232650191	447.6825119545
127.1561303304	42.3232650191	447.6145379042
127.1561428535	42.3232650191	447.5465638540
127.1561553765	42.3232650191	447.4785898038
127.1554290409	42.3232742801	453.6571340182
127.1554415639	42.3232742801	453.5293256683
127.1554540870	42.3232742801	453.4015173186
127.1554666100	42.3232742801	453.2737089687
127.1554791330	42.3232742801	453.1459006190
127.1554916560	42.3232742801	453.0180922691
127.1555041791	42.3232742801	452.8902839194
127.1555167021	42.3232742801	452.7624716438
127.1555292251	42.3232742801	452.6346593534
127.1555417481	42.3232742801	452.5068470629
127.1555542712	42.3232742801	452.3790347725
127.1555667942	42.3232742801	452.2512224820
127.1555793172	42.3232742801	452.1234101916
127.1555918403	42.3232742801	451.9955979011
127.1556043633	42.3232742801	451.8677856107
127.1556168863	42.3232742801	451.7399733202
127.1556294093	42.3232742801	451.6121610296
127.1556419324	42.3232742801	451.4843487393
127.1556544554	42.3232742801	451.3565364487
127.1556669784	42.3232742801	451.2287241583
127.1556795015	42.3232742801	451.1009128571
127.1556920245	42.3232742801	450.9731039954
127.1557045475	42.3232742801	450.8452951336
127.1557170705	42.3232742801	450.7174862719
127.1557295936	42.3232742801	450.5896774100
127.1557421166	42.3232742801	450.4618685483
127.1557546396	42.3232742801	450.3340596864
127.1557671626	42.3232742801	450.2181872613
127.1557796857	42.3232742801	450.1177665391
127.1557922087	42.3232742801	450.0173458168
127.1558047317	42.3232742801	449.9169250947
127.1558172548	42.3232742801	449.8165043725
127.1558297778	42.3232742801	449.7160836504
127.1558423008	42.3232742801	449.6156629282
127.1558548238	42.3232742801	449.5152428009
127.1558673469	42.3232742801	449.4148231026
127.1558798699	42.3232742801	449.3144034045
127.1558923929	42.3232742801	449.2139837062
127.1559049159	42.3232742801	449.1135640081
127.1559174390	42.3232742801	449.0131443098
127.1559299620	42.3232742801	448.9127246117
127.1559424850	42.3232742801	448.8123041689
127.1559550081	42.3232742801	448.7118834468
127.1559675311	42.3232742801	448.6114627246
127.1559800541	42.3232742801	448.5110420024
127.1559925771	42.3232742801	448.4106212803
127.1560051002	42.3232742801	448.3102005581
127.1560176232	42.3232742801	448.2097798360
127.1560301462	42.3232742801	448.1093561198
127.1560426693	42.3232742801	448.0089319690
127.1560551923	42.3232742801	447.9085078181
127.1560677153	42.3232742801	447.8080836673
127.1560802383	42.3232742801	447.7076595164
127.1560927614	42.3232742801	447.6072353656
127.1561052844	42.3232742801	447.5074788020
127.1561178074	42.3232742801	447.4414750088
127.1561303304	42.3232742801	447.3754712154
127.1561428535	42.3232742801	447.3094674221
127.1561553765	42.3232742801	447.2434636287
127.1554290409	42.3232835411	453.4140918950
127.1554415639	42.3232835411	453.2862835451
127.1554540870	42.3232835411	453.1584751954
127.1554666100	42.3232835411	453.0306668455
127.1554791330	42.3232835411	452.9028584958
127.1554916560	42.3232835411	452.7750501459
127.1555041791	42.3232835411	452.6472417962
127.1555167021	42.3232835411	452.5194290420
127.1555292251	42.3232835411	452.3916162712
127.1555417481	42.3232835411	452.2638035002
127.1555542712	42.3232835411	452.1359907294
127.1555667942	42.3232835411	452.0081779585
127.1555793172	42.3232835411	451.8803651876
127.1555918403	42.3232835411	451.7525524167
127.1556043633	42.3232835411	451.6247396459
127.1556168863	42.3232835411	451.4969268749
127.1556294093	42.3232835411	451.3691141039
127.1556419324	42.3232835411	451.2413013331
127.1556544554	42.3232835411	451.1134885622
127.1556669784	42.3232835411	450.9856757913
127.1556795015	42.3232835411	450.8578642869
127.1556920245	42.3232835411	450.7300559057
127.1557045475	42.3232835411	450.6022475242
127.1557170705	42.3232835411	450.4744391430
127.1557295936	42.3232835411	450.3466307616
127.1557421166	42.3232835411	450.2188223803
127.1557546396	42.3232835411	450.0910139989
127.1557671626	42.3232835411	449.9751420541
127.1557796857	42.3232835411	449.8747218123
127.1557922087	42.3232835411	449.7743015706
127.1558047317	42.3232835411	449.6738813289
127.1558172548	42.3232835411	449.5734610871
127.1558297778	42.3232835411	449.4730408454
127.1558423008	42.3232835411	449.3726206037
127.1558548238	42.3232835411	449.2722003986
127.1558673469	42.3232835411	449.1717802199
127.1558798699	42.3232835411	449.0713600414
127.1558923929	42.3232835411	448.9709398627
127.1559049159	42.3232835411	448.8705196841
127.1559174390	42.3232835411	448.7700995054
127.1559299620	42.3232835411	448.6696793268
127.1559424850	42.3232835411	448.5692591022
127.1559550081	42.3232835411	448.4688388606
127.1559675311	42.3232835411	448.3684186188
127.1559800541	42.3232835411	448.2679983770
127.1559925771	42.3232835411	448.1675781353
127.1560051002	42.3232835411	448.0671578935
127.1560176232	42.3232835411	447.9667376519
127.1560301462	42.3232835411	447.8663135770
127.1560426693	42.3232835411	447.7658889458
127.1560551923	42.3232835411	447.6654643145
127.1560677153	42.3232835411	447.5650396833
127.1560802383	42.3232835411	447.4646150520
127.1560927614	42.3232835411	447.3641904207
127.1561052844	42.3232835411	447.2644715994
127.1561178074	42.3232835411	447.2004380630
127.1561303304	42.3232835411	447.1364045266
127.1561428535	42.3232835411	447.0723709902
127.1561553765	42.3232835411	447.0083374537
127.1554290409	42.3232928021	453.1710463136
127.1554415639	42.3232928021	453.0432375148
127.1554540870	42.3232928021	452.9154287162
127.1554666100	42.3232928021	452.7876199175
127.1554791330	42.3232928021	452.6598111188
127.1554916560	42.3232928021	452.5320023201
127.1555041791	42.3232928021	452.4041935215
127.1555167021	42.3232928021	452.2763811814
127.1555292251	42.3232928021	452.1485688279
127.1555417481	42.3232928021	452.0207564743
127.1555542712	42.3232928021	451.8929441208
127.1555667942	42.3232928021	451.7651317672
127.1555793172	42.3232928021	451.6373194137
127.1555918403	42.3232928021	451.5095070601
127.1556043633	42.3232928021	451.3816947066
127.1556168863	42.3232928021	451.2538823530
127.1556294093	42.3232928021	451.1260699994
127.1556419324	42.3232928021	450.9982576459
127.1556544554	42.3232928021	450.8704452923
127.1556669784	42.3232928021	450.7426329388
127.1556795015	42.3232928021	450.6148217405
127.1556920245	42.3232928021	450.4870133907
127.1557045475	42.3232928021	450.3592050409
127.1557170705	42.3232928021	450.2313966911
127.1557295936	42.3232928021	450.1035883413
127.1557421166	42.3232928021	449.9757799915
127.1557546396	42.3232928021	449.8479716417
127.1557671626	42.3232928021	449.7328969089
127.1557796857	42.3232928021	449.6343175940
127.1557922087	42.3232928021	449.5357382791
127.1558047317	42.3232928021	449.4371589643
127.1558172548	42.3232928021	449.3385796495
127.1558297778	42.3232928021	449.2400003347
127.1558423008	42.3232928021	449.1414210198
127.1558548238	42.3232928021	449.0428414443
127.1558673469	42.3232928021	448.9442616806
127.1558798699	42.3232928021	448.8456819169
127.1558923929	42.3232928021	448.7471021531
127.1559049159	42.3232928021	448.6485223895
127.1559174390	42.3232928021	448.5499426257
127.1559299620	42.3232928021	448.4513628621
127.1559424850	42.3232928021	448.3527834247
127.1559550081	42.3232928021	448.2542041099
127.1559675311	42.3232928021	448.1556247950
127.1559800541	42.3232928021	448.0570454802
127.1559925771	42.3232928021	447.9584661654
127.1560051002	42.3232928021	447.8598868505
127.1560176232	42.3232928021	447.7613075358
127.1560301462	42.3232928021	447.6627243327
127.1560426693	42.3232928021	447.5641405653
127.1560551923	42.3232928021	447.4655567978
127.1560677153	42.3232928021	447.3669730304
127.1560802383	42.3232928021	447.2683892629
127.1560927614	42.3232928021	447.1698054955
127.1561052844	42.3232928021	447.0718943432
127.1561178074	42.3232928021	447.0079901684
127.1561303304	42.3232928021	446.9440859934
127.1561428535	42.3232928021	446.8801818186
127.1561553765	42.3232928021	446.8162776436
127.1554290409	42.3233020632	452.9280004892
127.1554415639	42.3233020632	452.8001912100
127.1554540870	42.3233020632	452.6723819310
127.1554666100	42.3233020632	452.5445726518
127.1554791330	42.3233020632	452.4167633727
127.1554916560	42.3233020632	452.2889540935
127.1555041791	42.3233020632	452.1611448145
127.1555167021	42.3233020632	452.0333329512
127.1555292251	42.3233020632	451.9055210781
127.1555417481	42.3233020632	451.7777092049
127.1555542712	42.3233020632	451.6498973319
127.1555667942	42.3233020632	451.5220854587
127.1555793172	42.3233020632	451.3942735857
127.1555918403	42.3233020632	451.2664617125
127.1556043633	42.3233020632	451.1386498395
127.1556168863	42.3233020632	451.0108379663
127.1556294093	42.3233020632	450.8830260931
127.1556419324	42.3233020632	450.7552142201
127.1556544554	42.3233020632	450.6274023469
127.1556669784	42.3233020632	450.4995904738
127.1556795015	42.3233020632	450.3717796173
127.1556920245	42.3233020632	450.2439712675
127.1557045475	42.3233020632	450.1161629177
127.1557170705	42.3233020632	449.9883545679
127.1557295936	42.3233020632	449.8605462181
127.1557421166	42.3233020632	449.7327378683
127.1557546396	42.3233020632	449.6049295185
127.1557671626	42.3233020632	449.4907079847
127.1557796857	42.3233020632	449.3940989267
127.1557922087	42.3233020632	449.2974898688
127.1558047317	42.3233020632	449.2008808109
127.1558172548	42.3233020632	449.1042717529
127.1558297778	42.3233020632	449.0076626950
127.1558423008	42.3233020632	448.9110536371
127.1558548238	42.3233020632	448.8144440394
127.1558673469	42.3233020632	448.7178340521
127.1558798699	42.3233020632	448.6212240649
127.1558923929	42.3233020632	448.5246140776
127.1559049159	42.3233020632	448.4280040904
127.1559174390	42.3233020632	448.3313941031
127.1559299620	42.3233020632	448.2347841159
127.1559424850	42.3233020632	448.1381748042
127.1559550081	42.3233020632	448.0415657464
127.1559675311	42.3233020632	447.9449566884
127.1559800541	42.3233020632	447.8483476304
127.1559925771	42.3233020632	447.7517385725
127.1560051002	42.3233020632	447.6551295146
127.1560176232	42.3233020632	447.5585204567
127.1560301462	42.3233020632	447.4619075106
127.1560426693	42.3233020632	447.3652940001
127.1560551923	42.3233020632	447.2686804894
127.1560677153	42.3233020632	447.1720669789
127.1560802383	42.3233020632	447.0754534683
127.1560927614	42.3233020632	446.9788399578
127.1561052844	42.3233020632	446.8828608490
127.1561178074	42.3233020632	446.8189566742
127.1561303304	42.3233020632	446.7550524992
127.1561428535	42.3233020632	446.6911483244
127.1561553765	42.3233020632	446.6272441494
127.1554290409	42.3233113242	452.6849546649
127.1554415639	42.3233113242	452.5571449052
127.1554540870	42.3233113242	452.4293351457
127.1554666100	42.3233113242	452.3015253861
127.1554791330	42.3233113242	452.1737156266
127.1554916560	42.3233113242	452.0459058670
127.1555041791	42.3233113242	451.9180961075
127.1555167021	42.3233113242	451.7902847210
127.1555292251	42.3233113242	451.6624733284
127.1555417481	42.3233113242	451.5346619356
127.1555542712	42.3233113242	451.4068505430
127.1555667942	42.3233113242	451.2790391503
127.1555793172	42.3233113242	451.1512277577
127.1555918403	42.3233113242	451.0234163649
127.1556043633	42.3233113242	450.8956049723
127.1556168863	42.3233113242	450.7677935795
127.1556294093	42.3233113242	450.6399821868
127.1556419324	42.3233113242	450.5121707942
127.1556544554	42.3233113242	450.3843594014
127.1556669784	42.3233113242	450.2565480088
127.1556795015	42.3233113242	450.1287374941
127.1556920245	42.3233113242	450.0009291444
127.1557045475	42.3233113242	449.8731207945
127.1557170705	42.3233113242	449.7453124447
127.1557295936	42.3233113242	449.6175040949
127.1557421166	42.3233113242	449.4896957451
127.1557546396	42.3233113242	449.3618873953
127.1557671626	42.3233113242	449.2485190606
127.1557796857	42.3233113242	449.1538802595
127.1557922087	42.3233113242	449.0592414584
127.1558047317	42.3233113242	448.9646026574
127.1558172548	42.3233113242	448.8699638564
127.1558297778	42.3233113242	448.7753250554
127.1558423008	42.3233113242	448.6806862543
127.1558548238	42.3233113242	448.5860466344
127.1558673469	42.3233113242	448.4914064236
127.1558798699	42.3233113242	448.3967662128
127.1558923929	42.3233113242	448.3021260020
127.1559049159	42.3233113242	448.2074857913
127.1559174390	42.3233113242	448.1128455804
127.1559299620	42.3233113242	448.0182053697
127.1559424850	42.3233113242	447.9235661838
127.1559550081	42.3233113242	447.8289273828
127.1559675311	42.3233113242	447.7342885817
127.1559800541	42.3233113242	447.6396497806
127.1559925771	42.3233113242	447.5450109797
127.1560051002	42.3233113242	447.4503721786
127.1560176232	42.3233113242	447.3557333776
127.1560301462	42.3233113242	447.2610906884
127.1560426693	42.3233113242	447.1664474348
127.1560551923	42.3233113242	447.0718041810
127.1560677153	42.3233113242	446.9771609274
127.1560802383	42.3233113242	446.8825176737
127.1560927614	42.3233113242	446.7878744201
127.1561052844	42.3233113242	446.6938273548
127.1561178074	42.3233113242	446.6299231799
127.1561303304	42.3233113242	446.5660190050
127.1561428535	42.3233113242	446.5021148301
127.1561553765	42.3233113242	446.4382106552
127.1554290409	42.3233205852	452.4419088407
127.1554415639	42.3233205852	452.3140986006
127.1554540870	42.3233205852	452.1862883607
127.1554666100	42.3233205852	452.0584781206
127.1554791330	42.3233205852	451.9306678807
127.1554916560	42.3233205852	451.8028576406
127.1555041791	42.3233205852	451.6750474007
127.1555167021	42.3233205852	451.5472364910
127.1555292251	42.3233205852	451.4194255788
127.1555417481	42.3233205852	451.2916146665
127.1555542712	42.3233205852	451.1638037543
127.1555667942	42.3233205852	451.0359928420
127.1555793172	42.3233205852	450.9081819298
127.1555918403	42.3233205852	450.7803710175
127.1556043633	42.3233205852	450.6525601053
127.1556168863	42.3233205852	450.5247491930
127.1556294093	42.3233205852	450.3969382807
127.1556419324	42.3233205852	450.2691273685
127.1556544554	42.3233205852	450.1413164562
127.1556669784	42.3233205852	450.0135055440
127.1556795015	42.3233205852	449.8856953711
127.1556920245	42.3233205852	449.7578870213
127.1557045475	42.3233205852	449.6300786715
127.1557170705	42.3233205852	449.5022703217
127.1557295936	42.3233205852	449.3744619719
127.1557421166	42.3233205852	449.2466536221
127.1557546396	42.3233205852	449.1188452723
127.1557671626	42.3233205852	449.0063301367
127.1557796857	42.3233205852	448.9136615925
127.1557922087	42.3233205852	448.8209930483
127.1558047317	42.3233205852	448.7283245042
127.1558172548	42.3233205852	448.6356559600
127.1558297778	42.3233205852	448.5429874159
127.1558423008	42.3233205852	448.4503188717
127.1558548238	42.3233205852	448.3576492296
127.1558673469	42.3233205852	448.2649787953
127.1558798699	42.3233205852	448.1723083610
127.1558923929	42.3233205852	448.0796379266
127.1559049159	42.3233205852	447.9869674923
127.1559174390	42.3233205852	447.8942970579
127.1559299620	42.3233205852	447.8016266236
127.1559424850	42.3233205852	447.7089575635
127.1559550081	42.3233205852	447.6162890194
127.1559675311	42.3233205852	447.5236204752
127.1559800541	42.3233205852	447.4309519311
127.1559925771	42.3233205852	447.3382833870
127.1560051002	42.3233205852	447.2456148428
127.1560176232	42.3233205852	447.1529462987
127.1560301462	42.3233205852	447.0602738663
127.1560426693	42.3233205852	446.9676008696
127.1560551923	42.3233205852	446.8749278728
127.1560677153	42.3233205852	446.7822548761
127.1560802383	42.3233205852	446.6895818792
127.1560927614	42.3233205852	446.5969088825
127.1561052844	42.3233205852	446.5047938607
127.1561178074	42.3233205852	446.4408896859
127.1561303304	42.3233205852	446.3769855109
127.1561428535	42.3233205852	446.3130813361
127.1561553765	42.3233205852	446.2491771611
127.1554290409	42.3233298462	452.1988630163
127.1554415639	42.3233298462	452.0710522958
127.1554540870	42.3233298462	451.9432415754
127.1554666100	42.3233298462	451.8154308549
127.1554791330	42.3233298462	451.6876201346
127.1554916560	42.3233298462	451.5598094141
127.1555041791	42.3233298462	451.4319986937
127.1555167021	42.3233298462	451.3041882608
127.1555292251	42.3233298462	451.1763778290
127.1555417481	42.3233298462	451.0485673971
127.1555542712	42.3233298462	450.9207569654
127.1555667942	42.3233298462	450.7929465335
127.1555793172	42.3233298462	450.6651361018
127.1555918403	42.3233298462	450.5373256699
127.1556043633	42.3233298462	450.4095152382
127.1556168863	42.3233298462	450.2817048063
127.1556294093	42.3233298462	450.1538943744
127.1556419324	42.3233298462	450.0260839426
127.1556544554	42.3233298462	449.8982735108
127.1556669784	42.3233298462	449.7704630790
127.1556795015	42.3233298462	449.6426532479
127.1556920245	42.3233298462	449.5148448982
127.1557045475	42.3233298462	449.3870365483
127.1557170705	42.3233298462	449.2592281986
127.1557295936	42.3233298462	449.1314198487
127.1557421166	42.3233298462	449.0036114990
127.1557546396	42.3233298462	448.8758031491
127.1557671626	42.3233298462	448.7641412125
127.1557796857	42.3233298462	448.6734429252
127.1557922087	42.3233298462	448.5827446379
127.1558047317	42.3233298462	448.4920463507
127.1558172548	42.3233298462	448.4013480634
127.1558297778	42.3233298462	448.3106497762
127.1558423008	42.3233298462	448.2199514889
127.1558548238	42.3233298462	448.1292518247
127.1558673469	42.3233298462	448.0385511668
127.1558798699	42.3233298462	447.9478505089
127.1558923929	42.3233298462	447.8571498510
127.1559049159	42.3233298462	447.7664491932
127.1559174390	42.3233298462	447.6757485353
127.1559299620	42.3233298462	447.5850478775
127.1559424850	42.3233298462	447.4943489431
127.1559550081	42.3233298462	447.4036506559
127.1559675311	42.3233298462	447.3129523686
127.1559800541	42.3233298462	447.2222540813
127.1559925771	42.3233298462	447.1315557941
127.1560051002	42.3233298462	447.0408575068
127.1560176232	42.3233298462	446.9501592196
127.1560301462	42.3233298462	446.8594570442
127.1560426693	42.3233298462	446.7687543043
127.1560551923	42.3233298462	446.6780515644
127.1560677153	42.3233298462	446.5873488246
127.1560802383	42.3233298462	446.4966460846
127.1560927614	42.3233298462	446.4059433448
127.1561052844	42.3233298462	446.3157603665
127.1561178074	42.3233298462	446.2518561917
127.1561303304	42.3233298462	446.1879520167
127.1561428535	42.3233298462	446.1240478419
127.1561553765	42.3233298462	446.0601436669
127.1554290409	42.3233391072	451.9558171919
127.1554415639	42.3233391072	451.8280059910
127.1554540870	42.3233391072	451.7001947902
127.1554666100	42.3233391072	451.5723835893
127.1554791330	42.3233391072	451.4445723885
127.1554916560	42.3233391072	451.3167611875
127.1555041791	42.3233391072	451.1889499868
127.1555167021	42.3233391072	451.0611400306
127.1555292251	42.3233391072	450.9333300793
127.1555417481	42.3233391072	450.8055201278
127.1555542712	42.3233391072	450.6777101765
127.1555667942	42.3233391072	450.5499002251
127.1555793172	42.3233391072	450.4220902737
127.1555918403	42.3233391072	450.2942803223
127.1556043633	42.3233391072	450.1664703710
127.1556168863	42.3233391072	450.0386604195
127.1556294093	42.3233391072	449.9108504681
127.1556419324	42.3233391072	449.7830405168
127.1556544554	42.3233391072	449.6552305653
127.1556669784	42.3233391072	449.5274206140
127.1556795015	42.3233391072	449.3996111247
127.1556920245	42.3233391072	449.2718027750
127.1557045475	42.3233391072	449.1439944251
127.1557170705	42.3233391072	449.0161860754
127.1557295936	42.3233391072	448.8883777255
127.1557421166	42.3233391072	448.7605693758
127.1557546396	42.3233391072	448.6327610259
127.1557671626	42.3233391072	448.5219522884
127.1557796857	42.3233391072	448.4332242580
127.1557922087	42.3233391072	448.3444962276
127.1558047317	42.3233391072	448.2557681973
127.1558172548	42.3233391072	448.1670401669
127.1558297778	42.3233391072	448.0783121366
127.1558423008	42.3233391072	447.9895841062
127.1558548238	42.3233391072	447.9008544197
127.1558673469	42.3233391072	447.8121235383
127.1558798699	42.3233391072	447.7233926569
127.1558923929	42.3233391072	447.6346617754
127.1559049159	42.3233391072	447.5459308941
127.1559174390	42.3233391072	447.4572000126
127.1559299620	42.3233391072	447.3684691313
127.1559424850	42.3233391072	447.2797403227
127.1559550081	42.3233391072	447.1910122924
127.1559675311	42.3233391072	447.1022842619
127.1559800541	42.3233391072	447.0135562315
127.1559925771	42.3233391072	446.9248282012
127.1560051002	42.3233391072	446.8361001708
127.1560176232	42.3233391072	446.7473721405
127.1560301462	42.3233391072	446.6586402220
127.1560426693	42.3233391072	446.5699077390
127.1560551923	42.3233391072	446.4811752560
127.1560677153	42.3233391072	446.3924427731
127.1560802383	42.3233391072	446.3037102900
127.1560927614	42.3233391072	446.2149778071
127.1561052844	42.3233391072	446.1267268723
127.1561178074	42.3233391072	446.0628226974
127.1561303304	42.3233391072	445.9989185225
127.1561428535	42.3233391072	445.9350143476
127.1561553765	42.3233391072	445.8711101727
127.1554290409	42.3233483683	451.7127713675
127.1554415639	42.3233483683	451.5849596862
127.1554540870	42.3233483683	451.4571480049
127.1554666100	42.3233483683	451.3293363236
127.1554791330	42.3233483683	451.2015246424
127.1554916560	42.3233483683	451.0737129610
127.1555041791	42.3233483683	450.9459012798
127.1555167021	42.3233483683	450.8180918004
127.1555292251	42.3233483683	450.6902823295
127.1555417481	42.3233483683	450.5624728585
127.1555542712	42.3233483683	450.4346633876
127.1555667942	42.3233483683	450.3068539166
127.1555793172	42.3233483683	450.1790444457
127.1555918403	42.3233483683	450.0512349747
127.1556043633	42.3233483683	449.9234255038
127.1556168863	42.3233483683	449.7956160328
127.1556294093	42.3233483683	449.6678065618
127.1556419324	42.3233483683	449.5399970909
127.1556544554	42.3233483683	449.4121876199
127.1556669784	42.3233483683	449.2843781490
127.1556795015	42.3233483683	449.1565690015
127.1556920245	42.3233483683	449.0287606518
127.1557045475	42.3233483683	448.9009523019
127.1557170705	42.3233483683	448.7731439522
127.1557295936	42.3233483683	448.6453356023
127.1557421166	42.3233483683	448.5175272526
127.1557546396	42.3233483683	448.3897189027
127.1557671626	42.3233483683	448.2797633643
127.1557796857	42.3233483683	448.1930055908
127.1557922087	42.3233483683	448.1062478172
127.1558047317	42.3233483683	448.0194900438
127.1558172548	42.3233483683	447.9327322703
127.1558297778	42.3233483683	447.8459744969
127.1558423008	42.3233483683	447.7592167234
127.1558548238	42.3233483683	447.6724570148
127.1558673469	42.3233483683	447.5856959098
127.1558798699	42.3233483683	447.4989348049
127.1558923929	42.3233483683	447.4121736999
127.1559049159	42.3233483683	447.3254125950
127.1559174390	42.3233483683	447.2386514900
127.1559299620	42.3233483683	447.1518903851
127.1559424850	42.3233483683	447.0651317022
127.1559550081	42.3233483683	446.9783739288
127.1559675311	42.3233483683	446.8916161553
127.1559800541	42.3233483683	446.8048583818
127.1559925771	42.3233483683	446.7181006084
127.1560051002	42.3233483683	446.6313428349
127.1560176232	42.3233483683	446.5445850614
127.1560301462	42.3233483683	446.4578233998
127.1560426693	42.3233483683	446.3710611737
127.1560551923	42.3233483683	446.2842989476
127.1560677153	42.3233483683	446.1975367216
127.1560802383	42.3233483683	446.1107744954
127.1560927614	42.3233483683	446.0240122694
127.1561052844	42.3233483683	445.9376933781
127.1561178074	42.3233483683	445.8737892032
127.1561303304	42.3233483683	445.8098850283
127.1561428535	42.3233483683	445.7459808534
127.1561553765	42.3233483683	445.6820766785
127.1554290409	42.3233576293	451.4697255431
127.1554415639	42.3233576293	451.3419133814
127.1554540870	42.3233576293	451.2141012197
127.1554666100	42.3233576293	451.0862890579
127.1554791330	42.3233576293	450.9584768963
127.1554916560	42.3233576293	450.8306647345
127.1555041791	42.3233576293	450.7028525728
127.1555167021	42.3233576293	450.5750435702
127.1555292251	42.3233576293	450.4472345797
127.1555417481	42.3233576293	450.3194255891
127.1555542712	42.3233576293	450.1916165987
127.1555667942	42.3233576293	450.0638076081
127.1555793172	42.3233576293	449.9359986177
127.1555918403	42.3233576293	449.8081896271
127.1556043633	42.3233576293	449.6803806367
127.1556168863	42.3233576293	449.5525716461
127.1556294093	42.3233576293	449.4247626555
127.1556419324	42.3233576293	449.2969536651
127.1556544554	42.3233576293	449.1691446745
127.1556669784	42.3233576293	449.0413356840
127.1556795015	42.3233576293	448.9135268783
127.1556920245	42.3233576293	448.7857185286
127.1557045475	42.3233576293	448.6579101787
127.1557170705	42.3233576293	448.5301018290
127.1557295936	42.3233576293	448.4022934791
127.1557421166	42.3233576293	448.2744851294
127.1557546396	42.3233576293	448.1466767795
127.1557671626	42.3233576293	448.0375744401
127.1557796857	42.3233576293	447.9527869235
127.1557922087	42.3233576293	447.8679994069
127.1558047317	42.3233576293	447.7832118904
127.1558172548	42.3233576293	447.6984243738
127.1558297778	42.3233576293	447.6136368572
127.1558423008	42.3233576293	447.5288493406
127.1558548238	42.3233576293	447.4440596098
127.1558673469	42.3233576293	447.3592682813
127.1558798699	42.3233576293	447.2744769528
127.1558923929	42.3233576293	447.1896856243
127.1559049159	42.3233576293	447.1048942958
127.1559174390	42.3233576293	447.0201029673
127.1559299620	42.3233576293	446.9353116389
127.1559424850	42.3233576293	446.8505230818
127.1559550081	42.3233576293	446.7657355653
127.1559675311	42.3233576293	446.6809480487
127.1559800541	42.3233576293	446.5961605320
127.1559925771	42.3233576293	446.5113730155
127.1560051002	42.3233576293	446.4265854989
127.1560176232	42.3233576293	446.3417979824
127.1560301462	42.3233576293	446.2570065776
127.1560426693	42.3233576293	446.1722146084
127.1560551923	42.3233576293	446.0874226392
127.1560677153	42.3233576293	446.0026306700
127.1560802383	42.3233576293	445.9178387008
127.1560927614	42.3233576293	445.8330467316
127.1561052844	42.3233576293	445.7486598839
127.1561178074	42.3233576293	445.6847557090
127.1561303304	42.3233576293	445.6208515341
127.1561428535	42.3233576293	445.5569473592
127.1561553765	42.3233576293	445.4930431843
127.1554290409	42.3233668903	451.2266797190
127.1554415639	42.3233668903	451.0988670767
127.1554540870	42.3233668903	450.9710544346
127.1554666100	42.3233668903	450.8432417924
127.1554791330	42.3233668903	450.7154291503
127.1554916560	42.3233668903	450.5876165081
127.1555041791	42.3233668903	450.4598038660
127.1555167021	42.3233668903	450.3319953402
127.1555292251	42.3233668903	450.2041868301
127.1555417481	42.3233668903	450.0763783200
127.1555542712	42.3233668903	449.9485698100
127.1555667942	42.3233668903	449.8207612998
127.1555793172	42.3233668903	449.6929527898
127.1555918403	42.3233668903	449.5651442797
127.1556043633	42.3233668903	449.4373357697
127.1556168863	42.3233668903	449.3095272595
127.1556294093	42.3233668903	449.1817187494
127.1556419324	42.3233668903	449.0539102394
127.1556544554	42.3233668903	448.9261017292
127.1556669784	42.3233668903	448.7982932192
127.1556795015	42.3233668903	448.6704847553
127.1556920245	42.3233668903	448.5426764056
127.1557045475	42.3233668903	448.4148680557
127.1557170705	42.3233668903	448.2870597060
127.1557295936	42.3233668903	448.1592513561
127.1557421166	42.3233668903	448.0314430064
127.1557546396	42.3233668903	447.9036346565
127.1557671626	42.3233668903	447.7953855162
127.1557796857	42.3233668903	447.7125682565
127.1557922087	42.3233668903	447.6297509967
127.1558047317	42.3233668903	447.5469337371
127.1558172548	42.3233668903	447.4641164774
127.1558297778	42.3233668903	447.3812992178
127.1558423008	42.3233668903	447.2984819580
127.1558548238	42.3233668903	447.2156622050
127.1558673469	42.3233668903	447.1328406530
127.1558798699	42.3233668903	447.0500191010
127.1558923929	42.3233668903	446.9671975489
127.1559049159	42.3233668903	446.8843759969
127.1559174390	42.3233668903	446.8015544448
127.1559299620	42.3233668903	446.7187328928
127.1559424850	42.3233668903	446.6359144615
127.1559550081	42.3233668903	446.5530972019
127.1559675311	42.3233668903	446.4702799422
127.1559800541	42.3233668903	446.3874626824
127.1559925771	42.3233668903	446.3046454228
127.1560051002	42.3233668903	446.2218281631
127.1560176232	42.3233668903	446.1390109034
127.1560301462	42.3233668903	446.0561897556
127.1560426693	42.3233668903	445.9733680433
127.1560551923	42.3233668903	445.8905463310
127.1560677153	42.3233668903	445.8077246187
127.1560802383	42.3233668903	445.7249029063
127.1560927614	42.3233668903	445.6420811941
127.1561052844	42.3233668903	445.5596263898
127.1561178074	42.3233668903	445.4957222149
127.1561303304	42.3233668903	445.4318180400
127.1561428535	42.3233668903	445.3679138651
127.1561553765	42.3233668903	445.3040096902
127.1554290409	42.3233761513	450.9836344389
127.1554415639	42.3233761513	450.8558219565
127.1554540870	42.3233761513	450.7280094743
127.1554666100	42.3233761513	450.6001969920
127.1554791330	42.3233761513	450.4723845098
127.1554916560	42.3233761513	450.3445720274
127.1555041791	42.3233761513	450.2167595452
127.1555167021	42.3233761513	450.0889508607
127.1555292251	42.3233761513	449.9611421908
127.1555417481	42.3233761513	449.8333335208
127.1555542712	42.3233761513	449.7055248509
127.1555667942	42.3233761513	449.5777161808
127.1555793172	42.3233761513	449.4499075110
127.1555918403	42.3233761513	449.3220989321
127.1556043633	42.3233761513	449.1942909025
127.1556168863	42.3233761513	449.0664828728
127.1556294093	42.3233761513	448.9386748431
127.1556419324	42.3233761513	448.8108668135
127.1556544554	42.3233761513	448.6830587838
127.1556669784	42.3233761513	448.5552507542
127.1556795015	42.3233761513	448.4274426321
127.1556920245	42.3233761513	448.2996342824
127.1557045475	42.3233761513	448.1718259325
127.1557170705	42.3233761513	448.0440175828
127.1557295936	42.3233761513	447.9162092329
127.1557421166	42.3233761513	447.7884008832
127.1557546396	42.3233761513	447.6605925333
127.1557671626	42.3233761513	447.5531986472
127.1557796857	42.3233761513	447.4723513242
127.1557922087	42.3233761513	447.3915040012
127.1558047317	42.3233761513	447.3106566783
127.1558172548	42.3233761513	447.2298093553
127.1558297778	42.3233761513	447.1489620324
127.1558423008	42.3233761513	447.0681147094
127.1558548238	42.3233761513	446.9872648001
127.1558673469	42.3233761513	446.9064130245
127.1558798699	42.3233761513	446.8255612489
127.1558923929	42.3233761513	446.7447094733
127.1559049159	42.3233761513	446.6638576978
127.1559174390	42.3233761513	446.5830059222
127.1559299620	42.3233761513	446.5021541466
127.1559424850	42.3233761513	446.4213058411
127.1559550081	42.3233761513	446.3404588383
127.1559675311	42.3233761513	446.2596118355
127.1559800541	42.3233761513	446.1787648327
127.1559925771	42.3233761513	446.0979178299
127.1560051002	42.3233761513	446.0170708271
127.1560176232	42.3233761513	445.9362238244
127.1560301462	42.3233761513	445.8553732130
127.1560426693	42.3233761513	445.7745220777
127.1560551923	42.3233761513	445.6936709424
127.1560677153	42.3233761513	445.6128198072
127.1560802383	42.3233761513	445.5319686719
127.1560927614	42.3233761513	445.4511175367
127.1561052844	42.3233761513	445.3705950837
127.1561178074	42.3233761513	445.3066905887
127.1561303304	42.3233761513	445.2427860936
127.1561428535	42.3233761513	445.1788815985
127.1561553765	42.3233761513	445.1149771034
127.1554290409	42.3233854123	450.7405894312
127.1554415639	42.3233854123	450.6127774293
127.1554540870	42.3233854123	450.4849654276
127.1554666100	42.3233854123	450.3571534256
127.1554791330	42.3233854123	450.2293414239
127.1554916560	42.3233854123	450.1015294220
127.1555041791	42.3233854123	449.9737174202
127.1555167021	42.3233854123	449.8459082589
127.1555292251	42.3233854123	449.7180991086
127.1555417481	42.3233854123	449.5902899581
127.1555542712	42.3233854123	449.4624808078
127.1555667942	42.3233854123	449.3346716573
127.1555793172	42.3233854123	449.2068625070
127.1555918403	42.3233854123	449.0790535845
127.1556043633	42.3233854123	448.9512460353
127.1556168863	42.3233854123	448.8234384861
127.1556294093	42.3233854123	448.6956309368
127.1556419324	42.3233854123	448.5678233876
127.1556544554	42.3233854123	448.4400158384
127.1556669784	42.3233854123	448.3122082892
127.1556795015	42.3233854123	448.1844005089
127.1556920245	42.3233854123	448.0565921592
127.1557045475	42.3233854123	447.9287838093
127.1557170705	42.3233854123	447.8009754596
127.1557295936	42.3233854123	447.6731671097
127.1557421166	42.3233854123	447.5453587600
127.1557546396	42.3233854123	447.4175504101
127.1557671626	42.3233854123	447.3110128070
127.1557796857	42.3233854123	447.2321352605
127.1557922087	42.3233854123	447.1532577140
127.1558047317	42.3233854123	447.0743801675
127.1558172548	42.3233854123	446.9955026210
127.1558297778	42.3233854123	446.9166250746
127.1558423008	42.3233854123	446.8377475280
127.1558548238	42.3233854123	446.7588673951
127.1558673469	42.3233854123	446.6799853960
127.1558798699	42.3233854123	446.6011033969
127.1558923929	42.3233854123	446.5222213977
127.1559049159	42.3233854123	446.4433393987
127.1559174390	42.3233854123	446.3644573995
127.1559299620	42.3233854123	446.2855754004
127.1559424850	42.3233854123	446.2066972207
127.1559550081	42.3233854123	446.1278204748
127.1559675311	42.3233854123	446.0489437289
127.1559800541	42.3233854123	445.9700669829
127.1559925771	42.3233854123	445.8911902371
127.1560051002	42.3233854123	445.8123134911
127.1560176232	42.3233854123	445.7334367453
127.1560301462	42.3233854123	445.6545568103
127.1560426693	42.3233854123	445.5756764124
127.1560551923	42.3233854123	445.4967960144
127.1560677153	42.3233854123	445.4179156165
127.1560802383	42.3233854123	445.3390352186
127.1560927614	42.3233854123	445.2601548207
127.1561052844	42.3233854123	445.1815648730
127.1561178074	42.3233854123	445.1176598975
127.1561303304	42.3233854123	445.0537549220
127.1561428535	42.3233854123	444.9898499465
127.1561553765	42.3233854123	444.9259449710
127.1554290409	42.3233946734	450.4975444236
127.1554415639	42.3233946734	450.3697329021
127.1554540870	42.3233946734	450.2419213808
127.1554666100	42.3233946734	450.1141098593
127.1554791330	42.3233946734	449.9862983380
127.1554916560	42.3233946734	449.8584868165
127.1555041791	42.3233946734	449.7306752952
127.1555167021	42.3233946734	449.6028656571
127.1555292251	42.3233946734	449.4750560263
127.1555417481	42.3233946734	449.3472463954
127.1555542712	42.3233946734	449.2194367647
127.1555667942	42.3233946734	449.0916271338
127.1555793172	42.3233946734	448.9638175030
127.1555918403	42.3233946734	448.8360082369
127.1556043633	42.3233946734	448.7082011682
127.1556168863	42.3233946734	448.5803940993
127.1556294093	42.3233946734	448.4525870305
127.1556419324	42.3233946734	448.3247799618
127.1556544554	42.3233946734	448.1969728929
127.1556669784	42.3233946734	448.0691658242
127.1556795015	42.3233946734	447.9413583857
127.1556920245	42.3233946734	447.8135500360
127.1557045475	42.3233946734	447.6857416861
127.1557170705	42.3233946734	447.5579333364
127.1557295936	42.3233946734	447.4301249865
127.1557421166	42.3233946734	447.3023166368
127.1557546396	42.3233946734	447.1745082869
127.1557671626	42.3233946734	447.0688269669
127.1557796857	42.3233946734	446.9919191968
127.1557922087	42.3233946734	446.9150114267
127.1558047317	42.3233946734	446.8381036567
127.1558172548	42.3233946734	446.7611958867
127.1558297778	42.3233946734	446.6842881167
127.1558423008	42.3233946734	446.6073803466
127.1558548238	42.3233946734	446.5304699902
127.1558673469	42.3233946734	446.4535577675
127.1558798699	42.3233946734	446.3766455449
127.1558923929	42.3233946734	446.2997333222
127.1559049159	42.3233946734	446.2228210996
127.1559174390	42.3233946734	446.1459088769
127.1559299620	42.3233946734	446.0689966542
127.1559424850	42.3233946734	445.9920886002
127.1559550081	42.3233946734	445.9151821113
127.1559675311	42.3233946734	445.8382756222
127.1559800541	42.3233946734	445.7613691332
127.1559925771	42.3233946734	445.6844626442
127.1560051002	42.3233946734	445.6075561552
127.1560176232	42.3233946734	445.5306496662
127.1560301462	42.3233946734	445.4537404076
127.1560426693	42.3233946734	445.3768307471
127.1560551923	42.3233946734	445.2999210864
127.1560677153	42.3233946734	445.2230114259
127.1560802383	42.3233946734	445.1461017652
127.1560927614	42.3233946734	445.0691921046
127.1561052844	42.3233946734	444.9925346622
127.1561178074	42.3233946734	444.9286292063
127.1561303304	42.3233946734	444.8647237504
127.1561428535	42.3233946734	444.8008182945
127.1561553765	42.3233946734	444.7369128385
127.1554290409	42.3234039344	450.2544994160
127.1554415639	42.3234039344	450.1266883750
127.1554540870	42.3234039344	449.9988773341
127.1554666100	42.3234039344	449.8710662930
127.1554791330	42.3234039344	449.7432552521
127.1554916560	42.3234039344	449.6154442111
127.1555041791	42.3234039344	449.4876331702
127.1555167021	42.3234039344	449.3598230553
127.1555292251	42.3234039344	449.2320129441
127.1555417481	42.3234039344	449.1042028328
127.1555542712	42.3234039344	448.9763927216
127.1555667942	42.3234039344	448.8485826103
127.1555793172	42.3234039344	448.7207724991
127.1555918403	42.3234039344	448.5929628893
127.1556043633	42.3234039344	448.4651563010
127.1556168863	42.3234039344	448.3373497126
127.1556294093	42.3234039344	448.2095431242
127.1556419324	42.3234039344	448.0817365359
127.1556544554	42.3234039344	447.9539299475
127.1556669784	42.3234039344	447.8261233592
127.1556795015	42.3234039344	447.6983162626
127.1556920245	42.3234039344	447.5705079128
127.1557045475	42.3234039344	447.4426995630
127.1557170705	42.3234039344	447.3148912132
127.1557295936	42.3234039344	447.1870828633
127.1557421166	42.3234039344	447.0592745136
127.1557546396	42.3234039344	446.9314661637
127.1557671626	42.3234039344	446.8266411267
127.1557796857	42.3234039344	446.7517031331
127.1557922087	42.3234039344	446.6767651395
127.1558047317	42.3234039344	446.6018271459
127.1558172548	42.3234039344	446.5268891523
127.1558297778	42.3234039344	446.4519511588
127.1558423008	42.3234039344	446.3770131652
127.1558548238	42.3234039344	446.3020725852
127.1558673469	42.3234039344	446.2271301390
127.1558798699	42.3234039344	446.1521876928
127.1558923929	42.3234039344	446.0772452466
127.1559049159	42.3234039344	446.0023028004
127.1559174390	42.3234039344	445.9273603542
127.1559299620	42.3234039344	445.8524179080
127.1559424850	42.3234039344	445.7774799798
127.1559550081	42.3234039344	445.7025437477
127.1559675311	42.3234039344	445.6276075156
127.1559800541	42.3234039344	445.5526712834
127.1559925771	42.3234039344	445.4777350513
127.1560051002	42.3234039344	445.4027988192
127.1560176232	42.3234039344	445.3278625871
127.1560301462	42.3234039344	445.2529240050
127.1560426693	42.3234039344	445.1779850817
127.1560551923	42.3234039344	445.1030461584
127.1560677153	42.3234039344	445.0281072352
127.1560802383	42.3234039344	444.9531683118
127.1560927614	42.3234039344	444.8782293886
127.1561052844	42.3234039344	444.8035044515
127.1561178074	42.3234039344	444.7395985152
127.1561303304	42.3234039344	444.6756925788
127.1561428535	42.3234039344	444.6117866425
127.1561553765	42.3234039344	444.5478807061
127.1554290409	42.3234131954	450.0114544086
127.1554415639	42.3234131954	449.8836438480
127.1554540870	42.3234131954	449.7558332875
127.1554666100	42.3234131954	449.6280227269
127.1554791330	42.3234131954	449.5002121664
127.1554916560	42.3234131954	449.3724016058
127.1555041791	42.3234131954	449.2445910453
127.1555167021	42.3234131954	449.1167804537
127.1555292251	42.3234131954	448.9889698621
127.1555417481	42.3234131954	448.8611592703
127.1555542712	42.3234131954	448.7333486787
127.1555667942	42.3234131954	448.6055380869
127.1555793172	42.3234131954	448.4777274953
127.1555918403	42.3234131954	448.3499175419
127.1556043633	42.3234131954	448.2221114340
127.1556168863	42.3234131954	448.0943053261
127.1556294093	42.3234131954	447.9664992181
127.1556419324	42.3234131954	447.8386931102
127.1556544554	42.3234131954	447.7108870022
127.1556669784	42.3234131954	447.5830808944
127.1556795015	42.3234131954	447.4552741396
127.1556920245	42.3234131954	447.3274657898
127.1557045475	42.3234131954	447.1996574399
127.1557170705	42.3234131954	447.0718490902
127.1557295936	42.3234131954	446.9440407403
127.1557421166	42.3234131954	446.8162323906
127.1557546396	42.3234131954	446.6884240407
127.1557671626	42.3234131954	446.5844552867
127.1557796857	42.3234131954	446.5114870695
127.1557922087	42.3234131954	446.4385188524
127.1558047317	42.3234131954	446.3655506353
127.1558172548	42.3234131954	446.2925824182
127.1558297778	42.3234131954	446.2196142011
127.1558423008	42.3234131954	446.1466459840
127.1558548238	42.3234131954	446.0736751805
127.1558673469	42.3234131954	446.0007025107
127.1558798699	42.3234131954	445.9277298410
127.1558923929	42.3234131954	445.8547571712
127.1559049159	42.3234131954	445.7817845015
127.1559174390	42.3234131954	445.7088118317
127.1559299620	42.3234131954	445.6358391620
127.1559424850	42.3234131954	445.5628713595
127.1559550081	42.3234131954	445.4899053843
127.1559675311	42.3234131954	445.4169394091
127.1559800541	42.3234131954	445.3439734338
127.1559925771	42.3234131954	445.2710074586
127.1560051002	42.3234131954	445.1980414834
127.1560176232	42.3234131954	445.1250755082
127.1560301462	42.3234131954	445.0521076025
127.1560426693	42.3234131954	444.9791394166
127.1560551923	42.3234131954	444.9061712306
127.1560677153	42.3234131954	444.8332030446
127.1560802383	42.3234131954	444.7602348586
127.1560927614	42.3234131954	444.6872666727
127.1561052844	42.3234131954	444.6144742409
127.1561178074	42.3234131954	444.5505678242
127.1561303304	42.3234131954	444.4866614073
127.1561428535	42.3234131954	444.4227549906
127.1561553765	42.3234131954	444.3588485738
127.1554290409	42.3234224564	449.7684094010
127.1554415639	42.3234224564	449.6405993208
127.1554540870	42.3234224564	449.5127892407
127.1554666100	42.3234224564	449.3849791606
127.1554791330	42.3234224564	449.2571690805
127.1554916560	42.3234224564	449.1293590003
127.1555041791	42.3234224564	449.0015489203
127.1555167021	42.3234224564	448.8737378519
127.1555292251	42.3234224564	448.7459267798
127.1555417481	42.3234224564	448.6181157076
127.1555542712	42.3234224564	448.4903046356
127.1555667942	42.3234224564	448.3624935634
127.1555793172	42.3234224564	448.2346824913
127.1555918403	42.3234224564	448.1068721943
127.1556043633	42.3234224564	447.9790665669
127.1556168863	42.3234224564	447.8512609393
127.1556294093	42.3234224564	447.7234553118
127.1556419324	42.3234224564	447.5956496844
127.1556544554	42.3234224564	447.4678440568
127.1556669784	42.3234224564	447.3400384294
127.1556795015	42.3234224564	447.2122320164
127.1556920245	42.3234224564	447.0844236666
127.1557045475	42.3234224564	446.9566153168
127.1557170705	42.3234224564	446.8288069670
127.1557295936	42.3234224564	446.7009986172
127.1557421166	42.3234224564	446.5731902674
127.1557546396	42.3234224564	446.4453819176
127.1557671626	42.3234224564	446.3422694465
127.1557796857	42.3234224564	446.2712710058
127.1557922087	42.3234224564	446.2002725651
127.1558047317	42.3234224564	446.1292741245
127.1558172548	42.3234224564	446.0582756839
127.1558297778	42.3234224564	445.9872772432
127.1558423008	42.3234224564	445.9162788026
127.1558548238	42.3234224564	445.8452777755
127.1558673469	42.3234224564	445.7742748822
127.1558798699	42.3234224564	445.7032719889
127.1558923929	42.3234224564	445.6322690956
127.1559049159	42.3234224564	445.5612662024
127.1559174390	42.3234224564	445.4902633091
127.1559299620	42.3234224564	445.4192604158
127.1559424850	42.3234224564	445.3482627391
127.1559550081	42.3234224564	445.2772670208
127.1559675311	42.3234224564	445.2062713024
127.1559800541	42.3234224564	445.1352755841
127.1559925771	42.3234224564	445.0642798658
127.1560051002	42.3234224564	444.9932841474
127.1560176232	42.3234224564	444.9222884291
127.1560301462	42.3234224564	444.8512911998
127.1560426693	42.3234224564	444.7802937512
127.1560551923	42.3234224564	444.7092963026
127.1560677153	42.3234224564	444.6382988540
127.1560802383	42.3234224564	444.5673014053
127.1560927614	42.3234224564	444.4963039567
127.1561052844	42.3234224564	444.4254440302
127.1561178074	42.3234224564	444.3615371330
127.1561303304	42.3234224564	444.2976302357
127.1561428535	42.3234224564	444.2337233386
127.1561553765	42.3234224564	444.1698164413
127.1554290409	42.3234317175	449.5253643934
127.1554415639	42.3234317175	449.3975547936
127.1554540870	42.3234317175	449.2697451940
127.1554666100	42.3234317175	449.1419355942
127.1554791330	42.3234317175	449.0141259946
127.1554916560	42.3234317175	448.8863163949
127.1555041791	42.3234317175	448.7585067953
127.1555167021	42.3234317175	448.6306952501
127.1555292251	42.3234317175	448.5028836976
127.1555417481	42.3234317175	448.3750721450
127.1555542712	42.3234317175	448.2472605925
127.1555667942	42.3234317175	448.1194490399
127.1555793172	42.3234317175	447.9916374874
127.1555918403	42.3234317175	447.8638268467
127.1556043633	42.3234317175	447.7360216997
127.1556168863	42.3234317175	447.6082165526
127.1556294093	42.3234317175	447.4804114055
127.1556419324	42.3234317175	447.3526062585
127.1556544554	42.3234317175	447.2248011114
127.1556669784	42.3234317175	447.0969959644
127.1556795015	42.3234317175	446.9691898932
127.1556920245	42.3234317175	446.8413815434
127.1557045475	42.3234317175	446.7135731936
127.1557170705	42.3234317175	446.5857648438
127.1557295936	42.3234317175	446.4579564940
127.1557421166	42.3234317175	446.3301481442
127.1557546396	42.3234317175	446.2023397944
127.1557671626	42.3234317175	446.1000836064
127.1557796857	42.3234317175	446.0310549421
127.1557922087	42.3234317175	445.9620262779
127.1558047317	42.3234317175	445.8929976138
127.1558172548	42.3234317175	445.8239689495
127.1558297778	42.3234317175	445.7549402854
127.1558423008	42.3234317175	445.6859116211
127.1558548238	42.3234317175	445.6168803705
127.1558673469	42.3234317175	445.5478472537
127.1558798699	42.3234317175	445.4788141369
127.1558923929	42.3234317175	445.4097810200
127.1559049159	42.3234317175	445.3407479033
127.1559174390	42.3234317175	445.2717147864
127.1559299620	42.3234317175	445.2026816696
127.1559424850	42.3234317175	445.1336541186
127.1559550081	42.3234317175	445.0646286572
127.1559675311	42.3234317175	444.9956031958
127.1559800541	42.3234317175	444.9265777343
127.1559925771	42.3234317175	444.8575522729
127.1560051002	42.3234317175	444.7885268114
127.1560176232	42.3234317175	444.7195013501
127.1560301462	42.3234317175	444.6504747972
127.1560426693	42.3234317175	444.5814480859
127.1560551923	42.3234317175	444.5124213745
127.1560677153	42.3234317175	444.4433946633
127.1560802383	42.3234317175	444.3743679519
127.1560927614	42.3234317175	444.3053412407
127.1561052844	42.3234317175	444.2364138195
127.1561178074	42.3234317175	444.1725064418
127.1561303304	42.3234317175	444.1085990641
127.1561428535	42.3234317175	444.0446916865
127.1561553765	42.3234317175	443.9807843088
127.1554290409	42.3234409785	449.2823193857
127.1554415639	42.3234409785	449.1545102664
127.1554540870	42.3234409785	449.0267011472
127.1554666100	42.3234409785	448.8988920279
127.1554791330	42.3234409785	448.7710829088
127.1554916560	42.3234409785	448.6432737894
127.1555041791	42.3234409785	448.5154646703
127.1555167021	42.3234409785	448.3876526483
127.1555292251	42.3234409785	448.2598406154
127.1555417481	42.3234409785	448.1320285823
127.1555542712	42.3234409785	448.0042165494
127.1555667942	42.3234409785	447.8764045163
127.1555793172	42.3234409785	447.7485924834
127.1555918403	42.3234409785	447.6207814991
127.1556043633	42.3234409785	447.4929768325
127.1556168863	42.3234409785	447.3651721659
127.1556294093	42.3234409785	447.2373674992
127.1556419324	42.3234409785	447.1095628326
127.1556544554	42.3234409785	446.9817581660
127.1556669784	42.3234409785	446.8539534994
127.1556795015	42.3234409785	446.7261477700
127.1556920245	42.3234409785	446.5983394203
127.1557045475	42.3234409785	446.4705310704
127.1557170705	42.3234409785	446.3427227206
127.1557295936	42.3234409785	446.2149143708
127.1557421166	42.3234409785	446.0871060210
127.1557546396	42.3234409785	445.9592976712
127.1557671626	42.3234409785	445.8578977662
127.1557796857	42.3234409785	445.7908388784
127.1557922087	42.3234409785	445.7237799907
127.1558047317	42.3234409785	445.6567211030
127.1558172548	42.3234409785	445.5896622152
127.1558297778	42.3234409785	445.5226033275
127.1558423008	42.3234409785	445.4555444397
127.1558548238	42.3234409785	445.3884829656
127.1558673469	42.3234409785	445.3214196252
127.1558798699	42.3234409785	445.2543562849
127.1558923929	42.3234409785	445.1872929445
127.1559049159	42.3234409785	445.1202296042
127.1559174390	42.3234409785	445.0531662638
127.1559299620	42.3234409785	444.9861029234
127.1559424850	42.3234409785	444.9190454982
127.1559550081	42.3234409785	444.8519902937
127.1559675311	42.3234409785	444.7849350891
127.1559800541	42.3234409785	444.7178798846
127.1559925771	42.3234409785	444.6508246801
127.1560051002	42.3234409785	444.5837694755
127.1560176232	42.3234409785	444.5167142710
127.1560301462	42.3234409785	444.4496583945
127.1560426693	42.3234409785	444.3826024206
127.1560551923	42.3234409785	444.3155464465
127.1560677153	42.3234409785	444.2484904726
127.1560802383	42.3234409785	444.1814344986
127.1560927614	42.3234409785	444.1143785246
127.1561052844	42.3234409785	444.0473836087
127.1561178074	42.3234409785	443.9834757507
127.1561303304	42.3234409785	443.9195678926
127.1561428535	42.3234409785	443.8556600345
127.1561553765	42.3234409785	443.7917521764
127.1554290409	42.3234502395	449.0392743781
127.1554415639	42.3234502395	448.9114657392
127.1554540870	42.3234502395	448.7836571005
127.1554666100	42.3234502395	448.6558484616
127.1554791330	42.3234502395	448.5280398229
127.1554916560	42.3234502395	448.4002311840
127.1555041791	42.3234502395	448.2724225453
127.1555167021	42.3234502395	448.1446100465
127.1555292251	42.3234502395	448.0167975331
127.1555417481	42.3234502395	447.8889850196
127.1555542712	42.3234502395	447.7611725063
127.1555667942	42.3234502395	447.6333599928
127.1555793172	42.3234502395	447.5055474794
127.1555918403	42.3234502395	447.3777361515
127.1556043633	42.3234502395	447.2499319654
127.1556168863	42.3234502395	447.1221277791
127.1556294093	42.3234502395	446.9943235929
127.1556419324	42.3234502395	446.8665194068
127.1556544554	42.3234502395	446.7387152205
127.1556669784	42.3234502395	446.6109110344
127.1556795015	42.3234502395	446.4831056468
127.1556920245	42.3234502395	446.3552972971
127.1557045475	42.3234502395	446.2274889472
127.1557170705	42.3234502395	446.0996805975
127.1557295936	42.3234502395	445.9718722476
127.1557421166	42.3234502395	445.8440638979
127.1557546396	42.3234502395	445.7162555480
127.1557671626	42.3234502395	445.6157119260
127.1557796857	42.3234502395	445.5506228147
127.1557922087	42.3234502395	445.4855337034
127.1558047317	42.3234502395	445.4204445922
127.1558172548	42.3234502395	445.3553554809
127.1558297778	42.3234502395	445.2902663696
127.1558423008	42.3234502395	445.2251772583
127.1558548238	42.3234502395	445.1600855606
127.1558673469	42.3234502395	445.0949919967
127.1558798699	42.3234502395	445.0298984328
127.1558923929	42.3234502395	444.9648048689
127.1559049159	42.3234502395	444.8997113050
127.1559174390	42.3234502395	444.8346177411
127.1559299620	42.3234502395	444.7695241772
127.1559424850	42.3234502395	444.7044368778
127.1559550081	42.3234502395	444.6393519302
127.1559675311	42.3234502395	444.5742669825
127.1559800541	42.3234502395	444.5091820348
127.1559925771	42.3234502395	444.4440970872
127.1560051002	42.3234502395	444.3790121395
127.1560176232	42.3234502395	444.3139271919
127.1560301462	42.3234502395	444.2488419918
127.1560426693	42.3234502395	444.1837567552
127.1560551923	42.3234502395	444.1186715185
127.1560677153	42.3234502395	444.0535862819
[truncated: 1,128 more rows]
