# Supplementary material for: Simulation Study on Coverage Path Planning of Autonomous Tasks in Hilly Farmland Based on Energy Consumption Model
Source: Hindawi journal article supplement (doi:10.1155/2020/4535734), 2020-08-30
Supplement: f1 [file 4535734.f1.zip › 4535734.f1/Algorithm-pathplanning-matlab/2020.04.25/0404/1.csv]

Longitude	Latitude	Elevation
127.1557936656	42.3227486747	463.8280266390
127.1558060977	42.3227486747	463.7277955986
127.1558185297	42.3227486747	463.6275645582
127.1558309618	42.3227486747	463.5273335178
127.1558433938	42.3227486747	463.4271024774
127.1558558259	42.3227486747	463.3268684942
127.1558682580	42.3227486747	463.2266330335
127.1558806900	42.3227486747	463.1263975729
127.1558931221	42.3227486747	463.0261621122
127.1559055541	42.3227486747	462.9259266514
127.1559179862	42.3227486747	462.8256911907
127.1559304183	42.3227486747	462.7254557301
127.1559428503	42.3227486747	462.6252228327
127.1559552824	42.3227486747	462.5249907370
127.1559677144	42.3227486747	462.4247586413
127.1559801465	42.3227486747	462.3245265458
127.1559925785	42.3227486747	462.2242944501
127.1560050106	42.3227486747	462.1240623544
127.1560174427	42.3227486747	462.0238302587
127.1560298747	42.3227486747	461.9235990682
127.1560423068	42.3227486747	461.8233680279
127.1560547388	42.3227486747	461.7231369874
127.1560671709	42.3227486747	461.6229059470
127.1560796030	42.3227486747	461.5226749066
127.1560920350	42.3227486747	461.4224438662
127.1561044671	42.3227486747	461.3222128258
127.1561168991	42.3227486747	461.2219807789
127.1561293312	42.3227486747	461.1217486832
127.1561417633	42.3227486747	461.0215165876
127.1561541953	42.3227486747	460.9212844919
127.1561666274	42.3227486747	460.8210523962
127.1561790594	42.3227486747	460.7208203005
127.1561914915	42.3227486747	460.6205882049
127.1562039236	42.3227486747	460.5203561093
127.1562163556	42.3227486747	460.4201240136
127.1562287877	42.3227486747	460.3198919179
127.1562412197	42.3227486747	460.2196598222
127.1562536518	42.3227486747	460.1194277266
127.1562660839	42.3227486747	460.0191956310
127.1562785159	42.3227486747	459.9189635353
127.1562909480	42.3227486747	459.8187314396
127.1563033800	42.3227486747	459.7184993440
127.1563158121	42.3227486747	459.6182672483
127.1563282442	42.3227486747	459.5180351526
127.1563406762	42.3227486747	459.4178030569
127.1563531083	42.3227486747	459.3175709614
127.1563655403	42.3227486747	459.2173388657
127.1563779724	42.3227486747	459.1171067700
127.1563904045	42.3227486747	459.0168746743
127.1564028365	42.3227486747	458.9166425786
127.1564152686	42.3227486747	458.8164104830
127.1564277006	42.3227486747	458.7161783873
127.1564401327	42.3227486747	458.6159462916
127.1564525647	42.3227486747	458.5158959664
127.1564649968	42.3227486747	458.4162018512
127.1564774289	42.3227486747	458.3165077359
127.1564898609	42.3227486747	458.2168136206
127.1565022930	42.3227486747	458.1171195052
127.1565147250	42.3227486747	458.0174253900
127.1565271571	42.3227486747	457.9177312747
127.1565395892	42.3227486747	457.8180386195
127.1565520212	42.3227486747	457.7183478692
127.1565644533	42.3227486747	457.6186571190
127.1565768853	42.3227486747	457.5189663688
127.1565893174	42.3227486747	457.4192756185
127.1557936656	42.3227577738	463.5765829144
127.1558060977	42.3227577738	463.4765917993
127.1558185297	42.3227577738	463.3766006841
127.1558309618	42.3227577738	463.2766095691
127.1558433938	42.3227577738	463.1766184540
127.1558558259	42.3227577738	463.0766243961
127.1558682580	42.3227577738	462.9766288607
127.1558806900	42.3227577738	462.8766333254
127.1558931221	42.3227577738	462.7766377899
127.1559055541	42.3227577738	462.6766422545
127.1559179862	42.3227577738	462.5766467191
127.1559304183	42.3227577738	462.4766511838
127.1559428503	42.3227577738	462.3766585687
127.1559552824	42.3227577738	462.2766668669
127.1559677144	42.3227577738	462.1766751651
127.1559801465	42.3227577738	462.0766834634
127.1559925785	42.3227577738	461.9766917616
127.1560050106	42.3227577738	461.8767000599
127.1560174427	42.3227577738	461.7767083581
127.1560298747	42.3227577738	461.6767171595
127.1560423068	42.3227577738	461.5767260445
127.1560547388	42.3227577738	461.4767349294
127.1560671709	42.3227577738	461.3767438142
127.1560796030	42.3227577738	461.2767526991
127.1560920350	42.3227577738	461.1767615841
127.1561044671	42.3227577738	461.0767704689
127.1561168991	42.3227577738	460.9767787943
127.1561293312	42.3227577738	460.8767870925
127.1561417633	42.3227577738	460.7767953908
127.1561541953	42.3227577738	460.6768036890
127.1561666274	42.3227577738	460.5768119872
127.1561790594	42.3227577738	460.4768202855
127.1561914915	42.3227577738	460.3768285837
127.1562039236	42.3227577738	460.2768368820
127.1562163556	42.3227577738	460.1768451802
127.1562287877	42.3227577738	460.0768534784
127.1562412197	42.3227577738	459.9768617767
127.1562536518	42.3227577738	459.8768700750
127.1562660839	42.3227577738	459.7768783732
127.1562785159	42.3227577738	459.6768866714
127.1562909480	42.3227577738	459.5768949696
127.1563033800	42.3227577738	459.4769032680
127.1563158121	42.3227577738	459.3769115662
127.1563282442	42.3227577738	459.2769198644
127.1563406762	42.3227577738	459.1769281626
127.1563531083	42.3227577738	459.0769364609
127.1563655403	42.3227577738	458.9769447592
127.1563779724	42.3227577738	458.8769530574
127.1563904045	42.3227577738	458.7769613556
127.1564028365	42.3227577738	458.6769696538
127.1564152686	42.3227577738	458.5769779521
127.1564277006	42.3227577738	458.4769862504
127.1564401327	42.3227577738	458.3769945486
127.1564525647	42.3227577738	458.2771032357
127.1564649968	42.3227577738	458.1774086519
127.1564774289	42.3227577738	458.0777140679
127.1564898609	42.3227577738	457.9780194840
127.1565022930	42.3227577738	457.8783249001
127.1565147250	42.3227577738	457.7786303163
127.1565271571	42.3227577738	457.6789357324
127.1565395892	42.3227577738	457.5792428119
127.1565520212	42.3227577738	457.4795520616
127.1565644533	42.3227577738	457.3798613114
127.1565768853	42.3227577738	457.2801705611
127.1565893174	42.3227577738	457.1804798109
127.1557936656	42.3227668729	463.3251391899
127.1558060977	42.3227668729	463.2253880001
127.1558185297	42.3227668729	463.1256368103
127.1558309618	42.3227668729	463.0258856206
127.1558433938	42.3227668729	462.9261344307
127.1558558259	42.3227668729	462.8263802982
127.1558682580	42.3227668729	462.7266246880
127.1558806900	42.3227668729	462.6268690780
127.1558931221	42.3227668729	462.5271134679
127.1559055541	42.3227668729	462.4273578578
127.1559179862	42.3227668729	462.3276022477
127.1559304183	42.3227668729	462.2278466377
127.1559428503	42.3227668729	462.1280943048
127.1559552824	42.3227668729	462.0283429969
127.1559677144	42.3227668729	461.9285916890
127.1559801465	42.3227668729	461.8288403813
127.1559925785	42.3227668729	461.7290890734
127.1560050106	42.3227668729	461.6293377655
127.1560174427	42.3227668729	461.5295864576
127.1560298747	42.3227668729	461.4298352510
127.1560423068	42.3227668729	461.3300840613
127.1560547388	42.3227668729	461.2303328715
127.1560671709	42.3227668729	461.1305816816
127.1560796030	42.3227668729	461.0308304918
127.1560920350	42.3227668729	460.9310793021
127.1561044671	42.3227668729	460.8313281123
127.1561168991	42.3227668729	460.7315768098
127.1561293312	42.3227668729	460.6318255020
127.1561417633	42.3227668729	460.5320741942
127.1561541953	42.3227668729	460.4323228863
127.1561666274	42.3227668729	460.3325715784
127.1561790594	42.3227668729	460.2328202706
127.1561914915	42.3227668729	460.1330689627
127.1562039236	42.3227668729	460.0333176549
127.1562163556	42.3227668729	459.9335663470
127.1562287877	42.3227668729	459.8338150392
127.1562412197	42.3227668729	459.7340637313
127.1562536518	42.3227668729	459.6343124235
127.1562660839	42.3227668729	459.5345611156
127.1562785159	42.3227668729	459.4348098078
127.1562909480	42.3227668729	459.3350584999
127.1563033800	42.3227668729	459.2353071921
127.1563158121	42.3227668729	459.1355558842
127.1563282442	42.3227668729	459.0358045764
127.1563406762	42.3227668729	458.9360532685
127.1563531083	42.3227668729	458.8363019607
127.1563655403	42.3227668729	458.7365506528
127.1563779724	42.3227668729	458.6367993450
127.1563904045	42.3227668729	458.5370480371
127.1564028365	42.3227668729	458.4372967292
127.1564152686	42.3227668729	458.3375454214
127.1564277006	42.3227668729	458.2377941136
127.1564401327	42.3227668729	458.1380428057
127.1564525647	42.3227668729	458.0383105051
127.1564649968	42.3227668729	457.9386154527
127.1564774289	42.3227668729	457.8389204002
127.1564898609	42.3227668729	457.7392253477
127.1565022930	42.3227668729	457.6395302952
127.1565147250	42.3227668729	457.5398352427
127.1565271571	42.3227668729	457.4401401902
127.1565395892	42.3227668729	457.3404470044
127.1565520212	42.3227668729	457.2407562541
127.1565644533	42.3227668729	457.1410655040
127.1565768853	42.3227668729	457.0413747537
127.1565893174	42.3227668729	456.9416840034
127.1557936656	42.3227759720	463.0831572471
127.1558060977	42.3227759720	462.9834664969
127.1558185297	42.3227759720	462.8837757466
127.1558309618	42.3227759720	462.7840849964
127.1558433938	42.3227759720	462.6843942461
127.1558558259	42.3227759720	462.5847007865
127.1558682580	42.3227759720	462.4850059665
127.1558806900	42.3227759720	462.3853111466
127.1558931221	42.3227759720	462.2856163266
127.1559055541	42.3227759720	462.1859215066
127.1559179862	42.3227759720	462.0862266866
127.1559304183	42.3227759720	461.9865318667
127.1559428503	42.3227759720	461.8868398797
127.1559552824	42.3227759720	461.7871487789
127.1559677144	42.3227759720	461.6874576781
127.1559801465	42.3227759720	461.5877665774
127.1559925785	42.3227759720	461.4880754765
127.1560050106	42.3227759720	461.3883843757
127.1560174427	42.3227759720	461.2886932748
127.1560298747	42.3227759720	461.1890027754
127.1560423068	42.3227759720	461.0893123758
127.1560547388	42.3227759720	460.9896219761
127.1560671709	42.3227759720	460.8899315764
127.1560796030	42.3227759720	460.7902411766
127.1560920350	42.3227759720	460.6905507770
127.1561044671	42.3227759720	460.5908603773
127.1561168991	42.3227759720	460.4911693089
127.1561293312	42.3227759720	460.3914782080
127.1561417633	42.3227759720	460.2917871073
127.1561541953	42.3227759720	460.1920960065
127.1561666274	42.3227759720	460.0924049056
127.1561790594	42.3227759720	459.9927138048
127.1561914915	42.3227759720	459.8930227389
127.1562039236	42.3227759720	459.7933323393
127.1562163556	42.3227759720	459.6936419395
127.1562287877	42.3227759720	459.5939515398
127.1562412197	42.3227759720	459.4942611401
127.1562536518	42.3227759720	459.3945707405
127.1562660839	42.3227759720	459.2948803408
127.1562785159	42.3227759720	459.1951898388
127.1562909480	42.3227759720	459.0954987380
127.1563033800	42.3227759720	458.9958076372
127.1563158121	42.3227759720	458.8961165364
127.1563282442	42.3227759720	458.7964254356
127.1563406762	42.3227759720	458.6967343347
127.1563531083	42.3227759720	458.5970432340
127.1563655403	42.3227759720	458.4973522180
127.1563779724	42.3227759720	458.3976614677
127.1563904045	42.3227759720	458.2979707174
127.1564028365	42.3227759720	458.1982799671
127.1564152686	42.3227759720	458.0985892169
127.1564277006	42.3227759720	457.9988984667
127.1564401327	42.3227759720	457.8992077164
127.1564525647	42.3227759720	457.7995155910
127.1564649968	42.3227759720	457.6998207712
127.1564774289	42.3227759720	457.6001259511
127.1564898609	42.3227759720	457.5004311311
127.1565022930	42.3227759720	457.4007363111
127.1565147250	42.3227759720	457.3010414912
127.1565271571	42.3227759720	457.2013466712
127.1565395892	42.3227759720	457.1016534649
127.1565520212	42.3227759720	457.0019623641
127.1565644533	42.3227759720	456.9022712634
127.1565768853	42.3227759720	456.8025801625
127.1565893174	42.3227759720	456.7028890617
127.1557936656	42.3227850711	462.8443614395
127.1558060977	42.3227850711	462.7446706892
127.1558185297	42.3227850711	462.6449799389
127.1558309618	42.3227850711	462.5452891888
127.1558433938	42.3227850711	462.4455984385
127.1558558259	42.3227850711	462.3459052908
127.1558682580	42.3227850711	462.2462109394
127.1558806900	42.3227850711	462.1465165881
127.1558931221	42.3227850711	462.0468222367
127.1559055541	42.3227850711	461.9471278853
127.1559179862	42.3227850711	461.8474335339
127.1559304183	42.3227850711	461.7477391826
127.1559428503	42.3227850711	461.6480469504
127.1559552824	42.3227850711	461.5483553810
127.1559677144	42.3227850711	461.4486638115
127.1559801465	42.3227850711	461.3489722422
127.1559925785	42.3227850711	461.2492806727
127.1560050106	42.3227850711	461.1495891033
127.1560174427	42.3227850711	461.0498975339
127.1560298747	42.3227850711	460.9502073697
127.1560423068	42.3227850711	460.8505174387
127.1560547388	42.3227850711	460.7508275076
127.1560671709	42.3227850711	460.6511375765
127.1560796030	42.3227850711	460.5514476454
127.1560920350	42.3227850711	460.4517577144
127.1561044671	42.3227850711	460.3520677833
127.1561168991	42.3227850711	460.2523762895
127.1561293312	42.3227850711	460.1526847201
127.1561417633	42.3227850711	460.0529931507
127.1561541953	42.3227850711	459.9533015813
127.1561666274	42.3227850711	459.8536100119
127.1561790594	42.3227850711	459.7539184424
127.1561914915	42.3227850711	459.6542269546
127.1562039236	42.3227850711	459.5545370236
127.1562163556	42.3227850711	459.4548470925
127.1562287877	42.3227850711	459.3551571614
127.1562412197	42.3227850711	459.2554672302
127.1562536518	42.3227850711	459.1557772992
127.1562660839	42.3227850711	459.0560873681
127.1562785159	42.3227850711	458.9563971981
127.1562909480	42.3227850711	458.8567056286
127.1563033800	42.3227850711	458.7570140593
127.1563158121	42.3227850711	458.6573224899
127.1563282442	42.3227850711	458.5576309204
127.1563406762	42.3227850711	458.4579393510
127.1563531083	42.3227850711	458.3582477816
127.1563655403	42.3227850711	458.2585564103
127.1563779724	42.3227850711	458.1588656600
127.1563904045	42.3227850711	458.0591749098
127.1564028365	42.3227850711	457.9594841595
127.1564152686	42.3227850711	457.8597934093
127.1564277006	42.3227850711	457.7601026590
127.1564401327	42.3227850711	457.6604119088
127.1564525647	42.3227850711	457.5607199418
127.1564649968	42.3227850711	457.4610255905
127.1564774289	42.3227850711	457.3613312391
127.1564898609	42.3227850711	457.2616368877
127.1565022930	42.3227850711	457.1619425362
127.1565147250	42.3227850711	457.0622481850
127.1565271571	42.3227850711	456.9625538335
127.1565395892	42.3227850711	456.8628606892
127.1565520212	42.3227850711	456.7631691198
127.1565644533	42.3227850711	456.6634775505
127.1565768853	42.3227850711	456.5637859810
127.1565893174	42.3227850711	456.4640944116
127.1557936656	42.3227941702	462.6055656321
127.1558060977	42.3227941702	462.5058748818
127.1558185297	42.3227941702	462.4061841315
127.1558309618	42.3227941702	462.3064933813
127.1558433938	42.3227941702	462.2068026311
127.1558558259	42.3227941702	462.1071097954
127.1558682580	42.3227941702	462.0074159126
127.1558806900	42.3227941702	461.9077220299
127.1558931221	42.3227941702	461.8080281471
127.1559055541	42.3227941702	461.7083342643
127.1559179862	42.3227941702	461.6086403815
127.1559304183	42.3227941702	461.5089464988
127.1559428503	42.3227941702	461.4092540212
127.1559552824	42.3227941702	461.3095619832
127.1559677144	42.3227941702	461.2098699451
127.1559801465	42.3227941702	461.1101779072
127.1559925785	42.3227941702	461.0104858692
127.1560050106	42.3227941702	460.9107938311
127.1560174427	42.3227941702	460.8111017931
127.1560298747	42.3227941702	460.7114119642
127.1560423068	42.3227941702	460.6117225019
127.1560547388	42.3227941702	460.5120330393
127.1560671709	42.3227941702	460.4123435768
127.1560796030	42.3227941702	460.3126541143
127.1560920350	42.3227941702	460.2129646519
127.1561044671	42.3227941702	460.1132751894
127.1561168991	42.3227941702	460.0135832704
127.1561293312	42.3227941702	459.9138912323
127.1561417633	42.3227941702	459.8141991944
127.1561541953	42.3227941702	459.7145071563
127.1561666274	42.3227941702	459.6148151183
127.1561790594	42.3227941702	459.5151230802
127.1561914915	42.3227941702	459.4154311705
127.1562039236	42.3227941702	459.3157417081
127.1562163556	42.3227941702	459.2160522456
127.1562287877	42.3227941702	459.1163627831
127.1562412197	42.3227941702	459.0166733206
127.1562536518	42.3227941702	458.9169838582
127.1562660839	42.3227941702	458.8172943956
127.1562785159	42.3227941702	458.7176045575
127.1562909480	42.3227941702	458.6179125195
127.1563033800	42.3227941702	458.5182204815
127.1563158121	42.3227941702	458.4185284435
127.1563282442	42.3227941702	458.3188364055
127.1563406762	42.3227941702	458.2191443674
127.1563531083	42.3227941702	458.1194523295
127.1563655403	42.3227941702	458.0197606029
127.1563779724	42.3227941702	457.9200698526
127.1563904045	42.3227941702	457.8203791023
127.1564028365	42.3227941702	457.7206883520
127.1564152686	42.3227941702	457.6209976019
127.1564277006	42.3227941702	457.5213068516
127.1564401327	42.3227941702	457.4216161013
127.1564525647	42.3227941702	457.3219242926
127.1564649968	42.3227941702	457.2222304100
127.1564774289	42.3227941702	457.1225365272
127.1564898609	42.3227941702	457.0228426444
127.1565022930	42.3227941702	456.9231487616
127.1565147250	42.3227941702	456.8234548789
127.1565271571	42.3227941702	456.7237609961
127.1565395892	42.3227941702	456.6240679137
127.1565520212	42.3227941702	456.5243758756
127.1565644533	42.3227941702	456.4246838377
127.1565768853	42.3227941702	456.3249917997
127.1565893174	42.3227941702	456.2252997616
127.1557936656	42.3228032693	462.3667698244
127.1558060977	42.3228032693	462.2670790742
127.1558185297	42.3228032693	462.1673883239
127.1558309618	42.3228032693	462.0676975737
127.1558433938	42.3228032693	461.9680068234
127.1558558259	42.3228032693	461.8683142997
127.1558682580	42.3228032693	461.7686208855
127.1558806900	42.3228032693	461.6689274714
127.1558931221	42.3228032693	461.5692340572
127.1559055541	42.3228032693	461.4695406430
127.1559179862	42.3228032693	461.3698472288
127.1559304183	42.3228032693	461.2701538147
127.1559428503	42.3228032693	461.1704610919
127.1559552824	42.3228032693	461.0707685852
127.1559677144	42.3228032693	460.9710760786
127.1559801465	42.3228032693	460.8713835720
127.1559925785	42.3228032693	460.7716910654
127.1560050106	42.3228032693	460.6719985587
127.1560174427	42.3228032693	460.5723060521
127.1560298747	42.3228032693	460.4726165586
127.1560423068	42.3228032693	460.3729275648
127.1560547388	42.3228032693	460.2732385709
127.1560671709	42.3228032693	460.1735495770
127.1560796030	42.3228032693	460.0738605831
127.1560920350	42.3228032693	459.9741715893
127.1561044671	42.3228032693	459.8744825954
127.1561168991	42.3228032693	459.7747902510
127.1561293312	42.3228032693	459.6750977444
127.1561417633	42.3228032693	459.5754052378
127.1561541953	42.3228032693	459.4757127312
127.1561666274	42.3228032693	459.3760202245
127.1561790594	42.3228032693	459.2763277179
127.1561914915	42.3228032693	459.1766353862
127.1562039236	42.3228032693	459.0769463924
127.1562163556	42.3228032693	458.9772573985
127.1562287877	42.3228032693	458.8775684046
127.1562412197	42.3228032693	458.7778794107
127.1562536518	42.3228032693	458.6781904169
127.1562660839	42.3228032693	458.5785014230
127.1562785159	42.3228032693	458.4788119168
127.1562909480	42.3228032693	458.3791194101
127.1563033800	42.3228032693	458.2794269036
127.1563158121	42.3228032693	458.1797343970
127.1563282442	42.3228032693	458.0800418903
127.1563406762	42.3228032693	457.9803493837
127.1563531083	42.3228032693	457.8806568771
127.1563655403	42.3228032693	457.7809647953
127.1563779724	42.3228032693	457.6812740450
127.1563904045	42.3228032693	457.5815832947
127.1564028365	42.3228032693	457.4818925444
127.1564152686	42.3228032693	457.3822017943
127.1564277006	42.3228032693	457.2825110440
127.1564401327	42.3228032693	457.1828202937
127.1564525647	42.3228032693	457.0831286433
127.1564649968	42.3228032693	456.9834352293
127.1564774289	42.3228032693	456.8837418151
127.1564898609	42.3228032693	456.7840484009
127.1565022930	42.3228032693	456.6843549867
127.1565147250	42.3228032693	456.5846615726
127.1565271571	42.3228032693	456.4849681584
127.1565395892	42.3228032693	456.3852751380
127.1565520212	42.3228032693	456.2855826313
127.1565644533	42.3228032693	456.1858901248
127.1565768853	42.3228032693	456.0861976181
127.1565893174	42.3228032693	455.9865051115
127.1557936656	42.3228123684	462.1279740168
127.1558060977	42.3228123684	462.0282832665
127.1558185297	42.3228123684	461.9285925163
127.1558309618	42.3228123684	461.8289017661
127.1558433938	42.3228123684	461.7292110158
127.1558558259	42.3228123684	461.6295188040
127.1558682580	42.3228123684	461.5298258584
127.1558806900	42.3228123684	461.4301329130
127.1558931221	42.3228123684	461.3304399674
127.1559055541	42.3228123684	461.2307470218
127.1559179862	42.3228123684	461.1310540762
127.1559304183	42.3228123684	461.0313611307
127.1559428503	42.3228123684	460.9316681625
127.1559552824	42.3228123684	460.8319751873
127.1559677144	42.3228123684	460.7322822120
127.1559801465	42.3228123684	460.6325892369
127.1559925785	42.3228123684	460.5328962616
127.1560050106	42.3228123684	460.4332032864
127.1560174427	42.3228123684	460.3335103111
127.1560298747	42.3228123684	460.2338211529
127.1560423068	42.3228123684	460.1341326277
127.1560547388	42.3228123684	460.0344441024
127.1560671709	42.3228123684	459.9347555771
127.1560796030	42.3228123684	459.8350670518
127.1560920350	42.3228123684	459.7353785266
127.1561044671	42.3228123684	459.6356900013
127.1561168991	42.3228123684	459.5359972317
127.1561293312	42.3228123684	459.4363042564
127.1561417633	42.3228123684	459.3366112813
127.1561541953	42.3228123684	459.2369183060
127.1561666274	42.3228123684	459.1372253308
127.1561790594	42.3228123684	459.0375323555
127.1561914915	42.3228123684	458.9378396019
127.1562039236	42.3228123684	458.8381510767
127.1562163556	42.3228123684	458.7384625514
127.1562287877	42.3228123684	458.6387740261
127.1562412197	42.3228123684	458.5390855008
127.1562536518	42.3228123684	458.4393969756
127.1562660839	42.3228123684	458.3397084503
127.1562785159	42.3228123684	458.2400192761
127.1562909480	42.3228123684	458.1403263008
127.1563033800	42.3228123684	458.0406333257
127.1563158121	42.3228123684	457.9409403504
127.1563282442	42.3228123684	457.8412473752
127.1563406762	42.3228123684	457.7415543999
127.1563531083	42.3228123684	457.6418614248
127.1563655403	42.3228123684	457.5421689876
127.1563779724	42.3228123684	457.4424782374
127.1563904045	42.3228123684	457.3427874871
127.1564028365	42.3228123684	457.2430967368
127.1564152686	42.3228123684	457.1434059866
127.1564277006	42.3228123684	457.0437152364
127.1564401327	42.3228123684	456.9440244861
127.1564525647	42.3228123684	456.8443329941
127.1564649968	42.3228123684	456.7446400486
127.1564774289	42.3228123684	456.6449471030
127.1564898609	42.3228123684	456.5452541574
127.1565022930	42.3228123684	456.4455612118
127.1565147250	42.3228123684	456.3458682663
127.1565271571	42.3228123684	456.2461753207
127.1565395892	42.3228123684	456.1464823623
127.1565520212	42.3228123684	456.0467893870
127.1565644533	42.3228123684	455.9470964119
127.1565768853	42.3228123684	455.8474034366
127.1565893174	42.3228123684	455.7477104614
127.1557936656	42.3228214674	461.8891782094
127.1558060977	42.3228214674	461.7894874591
127.1558185297	42.3228214674	461.6897967088
127.1558309618	42.3228214674	461.5901059587
127.1558433938	42.3228214674	461.4904152084
127.1558558259	42.3228214674	461.3907233086
127.1558682580	42.3228214674	461.2910308316
127.1558806900	42.3228214674	461.1913383547
127.1558931221	42.3228214674	461.0916458777
127.1559055541	42.3228214674	460.9919534007
127.1559179862	42.3228214674	460.8922609237
127.1559304183	42.3228214674	460.7925684469
127.1559428503	42.3228214674	460.6928752334
127.1559552824	42.3228214674	460.5931817895
127.1559677144	42.3228214674	460.4934883456
127.1559801465	42.3228214674	460.3937949019
127.1559925785	42.3228214674	460.2941014580
127.1560050106	42.3228214674	460.1944080142
127.1560174427	42.3228214674	460.0947145703
127.1560298747	42.3228214674	459.9950257474
127.1560423068	42.3228214674	459.8953376908
127.1560547388	42.3228214674	459.7956496341
127.1560671709	42.3228214674	459.6959615774
127.1560796030	42.3228214674	459.5962735207
127.1560920350	42.3228214674	459.4965854642
127.1561044671	42.3228214674	459.3968974075
127.1561168991	42.3228214674	459.2972042125
127.1561293312	42.3228214674	459.1975107686
127.1561417633	42.3228214674	459.0978173249
127.1561541953	42.3228214674	458.9981238810
127.1561666274	42.3228214674	458.8984304372
127.1561790594	42.3228214674	458.7987369933
127.1561914915	42.3228214674	458.6990438178
127.1562039236	42.3228214674	458.5993557612
127.1562163556	42.3228214674	458.4996677045
127.1562287877	42.3228214674	458.3999796478
127.1562412197	42.3228214674	458.3002915911
127.1562536518	42.3228214674	458.2006035346
127.1562660839	42.3228214674	458.1009154779
127.1562785159	42.3228214674	458.0012266355
127.1562909480	42.3228214674	457.9015331917
127.1563033800	42.3228214674	457.8018397479
127.1563158121	42.3228214674	457.7021463041
127.1563282442	42.3228214674	457.6024528602
127.1563406762	42.3228214674	457.5027594163
127.1563531083	42.3228214674	457.4030659726
127.1563655403	42.3228214674	457.3033731802
127.1563779724	42.3228214674	457.2036824299
127.1563904045	42.3228214674	457.1039916796
127.1564028365	42.3228214674	457.0043009294
127.1564152686	42.3228214674	456.9046101792
127.1564277006	42.3228214674	456.8049194289
127.1564401327	42.3228214674	456.7052286786
127.1564525647	42.3228214674	456.6055373449
127.1564649968	42.3228214674	456.5058448681
127.1564774289	42.3228214674	456.4061523911
127.1564898609	42.3228214674	456.3064599141
127.1565022930	42.3228214674	456.2067674371
127.1565147250	42.3228214674	456.1070749602
127.1565271571	42.3228214674	456.0073824832
127.1565395892	42.3228214674	455.9076895867
127.1565520212	42.3228214674	455.8079961429
127.1565644533	42.3228214674	455.7083026991
127.1565768853	42.3228214674	455.6086092553
127.1565893174	42.3228214674	455.5089158114
127.1557936656	42.3228305665	461.6503824018
127.1558060977	42.3228305665	461.5506916515
127.1558185297	42.3228305665	461.4510009012
127.1558309618	42.3228305665	461.3513101510
127.1558433938	42.3228305665	461.2516194007
127.1558558259	42.3228305665	461.1519278129
127.1558682580	42.3228305665	461.0522358045
127.1558806900	42.3228305665	460.9525437962
127.1558931221	42.3228305665	460.8528517879
127.1559055541	42.3228305665	460.7531597795
127.1559179862	42.3228305665	460.6534677711
127.1559304183	42.3228305665	460.5537757628
127.1559428503	42.3228305665	460.4540823040
127.1559552824	42.3228305665	460.3543883915
127.1559677144	42.3228305665	460.2546944791
127.1559801465	42.3228305665	460.1550005667
127.1559925785	42.3228305665	460.0553066543
127.1560050106	42.3228305665	459.9556127418
127.1560174427	42.3228305665	459.8559188293
127.1560298747	42.3228305665	459.7562303418
127.1560423068	42.3228305665	459.6565427538
127.1560547388	42.3228305665	459.5568551657
127.1560671709	42.3228305665	459.4571675776
127.1560796030	42.3228305665	459.3574799895
127.1560920350	42.3228305665	459.2577924015
127.1561044671	42.3228305665	459.1581048134
127.1561168991	42.3228305665	459.0584111932
127.1561293312	42.3228305665	458.9587172807
127.1561417633	42.3228305665	458.8590233684
127.1561541953	42.3228305665	458.7593294559
127.1561666274	42.3228305665	458.6596355434
127.1561790594	42.3228305665	458.5599416310
127.1561914915	42.3228305665	458.4602480336
127.1562039236	42.3228305665	458.3605604456
127.1562163556	42.3228305665	458.2608728575
127.1562287877	42.3228305665	458.1611852694
127.1562412197	42.3228305665	458.0614976813
127.1562536518	42.3228305665	457.9618100933
127.1562660839	42.3228305665	457.8621225052
127.1562785159	42.3228305665	457.7624339948
127.1562909480	42.3228305665	457.6627400823
127.1563033800	42.3228305665	457.5630461700
127.1563158121	42.3228305665	457.4633522575
127.1563282442	42.3228305665	457.3636583451
127.1563406762	42.3228305665	457.2639644326
127.1563531083	42.3228305665	457.1642705202
127.1563655403	42.3228305665	457.0645773726
127.1563779724	42.3228305665	456.9648866223
127.1563904045	42.3228305665	456.8651958720
127.1564028365	42.3228305665	456.7655051217
127.1564152686	42.3228305665	456.6658143716
127.1564277006	42.3228305665	456.5661236213
127.1564401327	42.3228305665	456.4664328710
127.1564525647	42.3228305665	456.3667416956
127.1564649968	42.3228305665	456.2670496874
127.1564774289	42.3228305665	456.1673576790
127.1564898609	42.3228305665	456.0676656706
127.1565022930	42.3228305665	455.9679736622
127.1565147250	42.3228305665	455.8682816540
127.1565271571	42.3228305665	455.7685896456
127.1565395892	42.3228305665	455.6688968110
127.1565520212	42.3228305665	455.5692028986
127.1565644533	42.3228305665	455.4695089862
127.1565768853	42.3228305665	455.3698150737
127.1565893174	42.3228305665	455.2701211613
127.1557936656	42.3228396656	461.4115865941
127.1558060977	42.3228396656	461.3118958438
127.1558185297	42.3228396656	461.2122050936
127.1558309618	42.3228396656	461.1125143434
127.1558433938	42.3228396656	461.0128235931
127.1558558259	42.3228396656	460.9131323172
127.1558682580	42.3228396656	460.8134407775
127.1558806900	42.3228396656	460.7137492378
127.1558931221	42.3228396656	460.6140576980
127.1559055541	42.3228396656	460.5143661582
127.1559179862	42.3228396656	460.4146746185
127.1559304183	42.3228396656	460.3149830788
127.1559428503	42.3228396656	460.2152893746
127.1559552824	42.3228396656	460.1155949936
127.1559677144	42.3228396656	460.0159006125
127.1559801465	42.3228396656	459.9162062316
127.1559925785	42.3228396656	459.8165118505
127.1560050106	42.3228396656	459.7168174694
127.1560174427	42.3228396656	459.6171230884
127.1560298747	42.3228396656	459.5174349361
127.1560423068	42.3228396656	459.4177478167
127.1560547388	42.3228396656	459.3180606972
127.1560671709	42.3228396656	459.2183735777
127.1560796030	42.3228396656	459.1186864582
127.1560920350	42.3228396656	459.0189993389
127.1561044671	42.3228396656	458.9193122194
127.1561168991	42.3228396656	458.8196181738
127.1561293312	42.3228396656	458.7199237928
127.1561417633	42.3228396656	458.6202294118
127.1561541953	42.3228396656	458.5205350307
127.1561666274	42.3228396656	458.4208406497
127.1561790594	42.3228396656	458.3211462686
127.1561914915	42.3228396656	458.2214522493
127.1562039236	42.3228396656	458.1217651299
127.1562163556	42.3228396656	458.0220780104
127.1562287877	42.3228396656	457.9223908909
127.1562412197	42.3228396656	457.8227037714
127.1562536518	42.3228396656	457.7230166520
127.1562660839	42.3228396656	457.6233295325
127.1562785159	42.3228396656	457.5236413541
127.1562909480	42.3228396656	457.4239469730
127.1563033800	42.3228396656	457.3242525920
127.1563158121	42.3228396656	457.2245582110
127.1563282442	42.3228396656	457.1248638299
127.1563406762	42.3228396656	457.0251694488
127.1563531083	42.3228396656	456.9254750679
127.1563655403	42.3228396656	456.8257815649
127.1563779724	42.3228396656	456.7260908147
127.1563904045	42.3228396656	456.6264000644
127.1564028365	42.3228396656	456.5267093141
127.1564152686	42.3228396656	456.4270185639
127.1564277006	42.3228396656	456.3273278137
127.1564401327	42.3228396656	456.2276370634
127.1564525647	42.3228396656	456.1279460464
127.1564649968	42.3228396656	456.0282545067
127.1564774289	42.3228396656	455.9285629669
127.1564898609	42.3228396656	455.8288714271
127.1565022930	42.3228396656	455.7291798873
127.1565147250	42.3228396656	455.6294883477
127.1565271571	42.3228396656	455.5297968079
127.1565395892	42.3228396656	455.4301040353
127.1565520212	42.3228396656	455.3304096542
127.1565644533	42.3228396656	455.2307152733
127.1565768853	42.3228396656	455.1310208922
127.1565893174	42.3228396656	455.0313265111
127.1557936656	42.3228487647	461.1727907865
127.1558060977	42.3228487647	461.0731000362
127.1558185297	42.3228487647	460.9734092859
127.1558309618	42.3228487647	460.8737185358
127.1558433938	42.3228487647	460.7740277855
127.1558558259	42.3228487647	460.6743368216
127.1558682580	42.3228487647	460.5746457504
127.1558806900	42.3228487647	460.4749546793
127.1558931221	42.3228487647	460.3752636082
127.1559055541	42.3228487647	460.2755725370
127.1559179862	42.3228487647	460.1758814658
127.1559304183	42.3228487647	460.0761903948
127.1559428503	42.3228487647	459.9764964453
127.1559552824	42.3228487647	459.8768015956
127.1559677144	42.3228487647	459.7771067460
127.1559801465	42.3228487647	459.6774118964
127.1559925785	42.3228487647	459.5777170467
127.1560050106	42.3228487647	459.4780221971
127.1560174427	42.3228487647	459.3783273474
127.1560298747	42.3228487647	459.2786395304
127.1560423068	42.3228487647	459.1789528797
127.1560547388	42.3228487647	459.0792662288
127.1560671709	42.3228487647	458.9795795779
127.1560796030	42.3228487647	458.8798929270
127.1560920350	42.3228487647	458.7802062762
127.1561044671	42.3228487647	458.6805196253
127.1561168991	42.3228487647	458.5808251545
127.1561293312	42.3228487647	458.4811303048
127.1561417633	42.3228487647	458.3814354552
127.1561541953	42.3228487647	458.2817406056
127.1561666274	42.3228487647	458.1820457559
127.1561790594	42.3228487647	458.0823509062
127.1561914915	42.3228487647	457.9826564650
127.1562039236	42.3228487647	457.8829698142
127.1562163556	42.3228487647	457.7832831633
127.1562287877	42.3228487647	457.6835965124
127.1562412197	42.3228487647	457.5839098616
127.1562536518	42.3228487647	457.4842232108
127.1562660839	42.3228487647	457.3845365599
127.1562785159	42.3228487647	457.2848487133
127.1562909480	42.3228487647	457.1851538637
127.1563033800	42.3228487647	457.0854590141
127.1563158121	42.3228487647	456.9857641644
127.1563282442	42.3228487647	456.8860693148
127.1563406762	42.3228487647	456.7863744651
127.1563531083	42.3228487647	456.6866796155
127.1563655403	42.3228487647	456.5869857573
127.1563779724	42.3228487647	456.4872950070
127.1563904045	42.3228487647	456.3876042568
127.1564028365	42.3228487647	456.2879135065
127.1564152686	42.3228487647	456.1882227563
127.1564277006	42.3228487647	456.0885320060
127.1564401327	42.3228487647	455.9888412558
127.1564525647	42.3228487647	455.8891503971
127.1564649968	42.3228487647	455.7894593260
127.1564774289	42.3228487647	455.6897682548
127.1564898609	42.3228487647	455.5900771836
127.1565022930	42.3228487647	455.4903861125
127.1565147250	42.3228487647	455.3906950414
127.1565271571	42.3228487647	455.2910039702
127.1565395892	42.3228487647	455.1913112596
127.1565520212	42.3228487647	455.0916164099
127.1565644533	42.3228487647	454.9919215604
127.1565768853	42.3228487647	454.8922267107
127.1565893174	42.3228487647	454.7925318610
127.1557936656	42.3228578638	460.9339949791
127.1558060977	42.3228578638	460.8343042288
127.1558185297	42.3228578638	460.7346134785
127.1558309618	42.3228578638	460.6349227283
127.1558433938	42.3228578638	460.5352319781
127.1558558259	42.3228578638	460.4355412278
127.1558682580	42.3228578638	460.3358504775
127.1558806900	42.3228578638	460.2361597273
127.1558931221	42.3228578638	460.1364689771
127.1559055541	42.3228578638	460.0367782268
127.1559179862	42.3228578638	459.9370874765
127.1559304183	42.3228578638	459.8373967263
127.1559428503	42.3228578638	459.7377027214
127.1559552824	42.3228578638	459.6380076985
127.1559677144	42.3228578638	459.5383126757
127.1559801465	42.3228578638	459.4386176529
127.1559925785	42.3228578638	459.3389226301
127.1560050106	42.3228578638	459.2392276072
127.1560174427	42.3228578638	459.1395325843
127.1560298747	42.3228578638	459.0398448913
127.1560423068	42.3228578638	458.9401584137
127.1560547388	42.3228578638	458.8404719360
127.1560671709	42.3228578638	458.7407854583
127.1560796030	42.3228578638	458.6410989806
127.1560920350	42.3228578638	458.5414125030
127.1561044671	42.3228578638	458.4417260253
127.1561168991	42.3228578638	458.3420313973
127.1561293312	42.3228578638	458.2423363745
127.1561417633	42.3228578638	458.1426413517
127.1561541953	42.3228578638	458.0429463288
127.1561666274	42.3228578638	457.9432513060
127.1561790594	42.3228578638	457.8435562831
127.1561914915	42.3228578638	457.7438616859
127.1562039236	42.3228578638	457.6441752084
127.1562163556	42.3228578638	457.5444887307
127.1562287877	42.3228578638	457.4448022530
127.1562412197	42.3228578638	457.3451157753
127.1562536518	42.3228578638	457.2454292977
127.1562660839	42.3228578638	457.1457428200
127.1562785159	42.3228578638	457.0460550961
127.1562909480	42.3228578638	456.9463600732
127.1563033800	42.3228578638	456.8466650505
127.1563158121	42.3228578638	456.7469700276
127.1563282442	42.3228578638	456.6472750048
127.1563406762	42.3228578638	456.5475799819
127.1563531083	42.3228578638	456.4478849592
127.1563655403	42.3228578638	456.3481909339
127.1563779724	42.3228578638	456.2485000359
127.1563904045	42.3228578638	456.1488091380
127.1564028365	42.3228578638	456.0491182400
127.1564152686	42.3228578638	455.9494273421
127.1564277006	42.3228578638	455.8497364441
127.1564401327	42.3228578638	455.7500455461
127.1564525647	42.3228578638	455.6503546980
127.1564649968	42.3228578638	455.5506639479
127.1564774289	42.3228578638	455.4509731976
127.1564898609	42.3228578638	455.3512824473
127.1565022930	42.3228578638	455.2515916970
127.1565147250	42.3228578638	455.1519009469
127.1565271571	42.3228578638	455.0522101966
127.1565395892	42.3228578638	454.9525175925
127.1565520212	42.3228578638	454.8528225696
127.1565644533	42.3228578638	454.7531275469
127.1565768853	42.3228578638	454.6534325240
127.1565893174	42.3228578638	454.5537375011
127.1557936656	42.3228669629	460.6951991714
127.1558060977	42.3228669629	460.5955084212
127.1558185297	42.3228669629	460.4958176709
127.1558309618	42.3228669629	460.3961269207
127.1558433938	42.3228669629	460.2964361704
127.1558558259	42.3228669629	460.1967454202
127.1558682580	42.3228669629	460.0970546699
127.1558806900	42.3228669629	459.9973639197
127.1558931221	42.3228669629	459.8976731694
127.1559055541	42.3228669629	459.7979824191
127.1559179862	42.3228669629	459.6982916689
127.1559304183	42.3228669629	459.5986009187
127.1559428503	42.3228669629	459.4989072707
127.1559552824	42.3228669629	459.3992127165
127.1559677144	42.3228669629	459.2995181622
127.1559801465	42.3228669629	459.1998236081
127.1559925785	42.3228669629	459.1001290538
127.1560050106	42.3228669629	459.0004344996
127.1560174427	42.3228669629	458.9007399453
127.1560298747	42.3228669629	458.8010519170
127.1560423068	42.3228669629	458.7013649708
127.1560547388	42.3228669629	458.6016780245
127.1560671709	42.3228669629	458.5019910782
127.1560796030	42.3228669629	458.4023041319
127.1560920350	42.3228669629	458.3026171857
127.1561044671	42.3228669629	458.2029302394
127.1561168991	42.3228669629	458.1032360366
127.1561293312	42.3228669629	458.0035414824
127.1561417633	42.3228669629	457.9038469282
127.1561541953	42.3228669629	457.8041523740
127.1561666274	42.3228669629	457.7044578197
127.1561790594	42.3228669629	457.6047632655
127.1561914915	42.3228669629	457.5050690902
127.1562039236	42.3228669629	457.4053821440
127.1562163556	42.3228669629	457.3056951977
127.1562287877	42.3228669629	457.2060082514
127.1562412197	42.3228669629	457.1063213051
127.1562536518	42.3228669629	457.0066343589
127.1562660839	42.3228669629	456.9069474126
127.1562785159	42.3228669629	456.8072593568
127.1562909480	42.3228669629	456.7075648026
127.1563033800	42.3228669629	456.6078702484
127.1563158121	42.3228669629	456.5081756942
127.1563282442	42.3228669629	456.4084811399
127.1563406762	42.3228669629	456.3087865856
127.1563531083	42.3228669629	456.2090920315
127.1563655403	42.3228669629	456.1093982482
127.1563779724	42.3228669629	456.0097068816
127.1563904045	42.3228669629	455.9100155150
127.1564028365	42.3228669629	455.8103241484
127.1564152686	42.3228669629	455.7106327820
127.1564277006	42.3228669629	455.6109414154
127.1564401327	42.3228669629	455.5112500488
127.1564525647	42.3228669629	455.4115588904
127.1564649968	42.3228669629	455.3118681402
127.1564774289	42.3228669629	455.2121773900
127.1564898609	42.3228669629	455.1124866397
127.1565022930	42.3228669629	455.0127958894
127.1565147250	42.3228669629	454.9131051392
127.1565271571	42.3228669629	454.8134143890
127.1565395892	42.3228669629	454.7137219882
127.1565520212	42.3228669629	454.6140274339
127.1565644533	42.3228669629	454.5143328798
127.1565768853	42.3228669629	454.4146383255
127.1565893174	42.3228669629	454.3149437712
127.1557936656	42.3228760620	460.4564033638
127.1558060977	42.3228760620	460.3567126135
127.1558185297	42.3228760620	460.2570218633
127.1558309618	42.3228760620	460.1573311131
127.1558433938	42.3228760620	460.0576403628
127.1558558259	42.3228760620	459.9579496125
127.1558682580	42.3228760620	459.8582588622
127.1558806900	42.3228760620	459.7585681121
127.1558931221	42.3228760620	459.6588773618
127.1559055541	42.3228760620	459.5591866115
127.1559179862	42.3228760620	459.4594958612
127.1559304183	42.3228760620	459.3598051111
127.1559428503	42.3228760620	459.2601118201
127.1559552824	42.3228760620	459.1604177344
127.1559677144	42.3228760620	459.0607236488
127.1559801465	42.3228760620	458.9610295632
127.1559925785	42.3228760620	458.8613354776
127.1560050106	42.3228760620	458.7616413919
127.1560174427	42.3228760620	458.6619473063
127.1560298747	42.3228760620	458.5622589426
127.1560423068	42.3228760620	458.4625715278
127.1560547388	42.3228760620	458.3628841129
127.1560671709	42.3228760620	458.2631966980
127.1560796030	42.3228760620	458.1635092831
127.1560920350	42.3228760620	458.0638218683
127.1561044671	42.3228760620	457.9641344534
127.1561168991	42.3228760620	457.8644406760
127.1561293312	42.3228760620	457.7647465903
127.1561417633	42.3228760620	457.6650525048
127.1561541953	42.3228760620	457.5653584191
127.1561666274	42.3228760620	457.4656643335
127.1561790594	42.3228760620	457.3659702478
127.1561914915	42.3228760620	457.2662764945
127.1562039236	42.3228760620	457.1665890797
127.1562163556	42.3228760620	457.0669016648
127.1562287877	42.3228760620	456.9672142499
127.1562412197	42.3228760620	456.8675268350
127.1562536518	42.3228760620	456.7678394202
127.1562660839	42.3228760620	456.6681520053
127.1562785159	42.3228760620	456.5684636175
127.1562909480	42.3228760620	456.4687695319
127.1563033800	42.3228760620	456.3690754463
127.1563158121	42.3228760620	456.2693813607
127.1563282442	42.3228760620	456.1696872750
127.1563406762	42.3228760620	456.0699931894
127.1563531083	42.3228760620	455.9702991038
127.1563655403	42.3228760620	455.8706055625
127.1563779724	42.3228760620	455.7709137273
127.1563904045	42.3228760620	455.6712218921
127.1564028365	42.3228760620	455.5715300569
127.1564152686	42.3228760620	455.4718382218
127.1564277006	42.3228760620	455.3721463866
127.1564401327	42.3228760620	455.2724545514
127.1564525647	42.3228760620	455.1727630828
127.1564649968	42.3228760620	455.0730723326
127.1564774289	42.3228760620	454.9733815823
127.1564898609	42.3228760620	454.8736908321
127.1565022930	42.3228760620	454.7740000818
127.1565147250	42.3228760620	454.6743093316
127.1565271571	42.3228760620	454.5746185813
127.1565395892	42.3228760620	454.4749263839
127.1565520212	42.3228760620	454.3752322982
127.1565644533	42.3228760620	454.2755382127
127.1565768853	42.3228760620	454.1758441270
127.1565893174	42.3228760620	454.0761500414
127.1557936656	42.3228851611	460.2176075564
127.1558060977	42.3228851611	460.1179168061
127.1558185297	42.3228851611	460.0182260558
127.1558309618	42.3228851611	459.9185353056
127.1558433938	42.3228851611	459.8188445554
127.1558558259	42.3228851611	459.7191538051
127.1558682580	42.3228851611	459.6194630548
127.1558806900	42.3228851611	459.5197723046
127.1558931221	42.3228851611	459.4200815544
127.1559055541	42.3228851611	459.3203908041
127.1559179862	42.3228851611	459.2207000538
127.1559304183	42.3228851611	459.1210093036
127.1559428503	42.3228851611	459.0213163696
127.1559552824	42.3228851611	458.9216227525
127.1559677144	42.3228851611	458.8219291355
127.1559801465	42.3228851611	458.7222355186
127.1559925785	42.3228851611	458.6225419015
127.1560050106	42.3228851611	458.5228482845
127.1560174427	42.3228851611	458.4231546674
127.1560298747	42.3228851611	458.3234659685
127.1560423068	42.3228851611	458.2237780851
127.1560547388	42.3228851611	458.1240902015
127.1560671709	42.3228851611	458.0244023180
127.1560796030	42.3228851611	457.9247144345
127.1560920350	42.3228851611	457.8250265511
127.1561044671	42.3228851611	457.7253386676
127.1561168991	42.3228851611	457.6256453155
127.1561293312	42.3228851611	457.5259516984
127.1561417633	42.3228851611	457.4262580815
127.1561541953	42.3228851611	457.3265644645
127.1561666274	42.3228851611	457.2268708474
127.1561790594	42.3228851611	457.1271772304
127.1561914915	42.3228851611	457.0274838989
127.1562039236	42.3228851611	456.9277960155
127.1562163556	42.3228851611	456.8281081320
127.1562287877	42.3228851611	456.7284202485
127.1562412197	42.3228851611	456.6287323650
127.1562536518	42.3228851611	456.5290444816
127.1562660839	42.3228851611	456.4293565981
127.1562785159	42.3228851611	456.3296678784
127.1562909480	42.3228851611	456.2299742614
127.1563033800	42.3228851611	456.1302806444
127.1563158121	42.3228851611	456.0305870274
127.1563282442	42.3228851611	455.9308934103
127.1563406762	42.3228851611	455.8311997933
127.1563531083	42.3228851611	455.7315061764
127.1563655403	42.3228851611	455.6318128769
127.1563779724	42.3228851611	455.5321205731
127.1563904045	42.3228851611	455.4324282693
127.1564028365	42.3228851611	455.3327359655
127.1564152686	42.3228851611	455.2330436619
127.1564277006	42.3228851611	455.1333513581
127.1564401327	42.3228851611	455.0336590543
127.1564525647	42.3228851611	454.9339672754
127.1564649968	42.3228851611	454.8342765252
127.1564774289	42.3228851611	454.7345857749
127.1564898609	42.3228851611	454.6348950246
127.1565022930	42.3228851611	454.5352042743
127.1565147250	42.3228851611	454.4355135242
127.1565271571	42.3228851611	454.3358227739
127.1565395892	42.3228851611	454.2361307797
127.1565520212	42.3228851611	454.1364371627
127.1565644533	42.3228851611	454.0367435458
127.1565768853	42.3228851611	453.9370499287
127.1565893174	42.3228851611	453.8373563117
127.1557936656	42.3228942602	459.9788117487
127.1558060977	42.3228942602	459.8791209985
127.1558185297	42.3228942602	459.7794302482
127.1558309618	42.3228942602	459.6797394980
127.1558433938	42.3228942602	459.5800487477
127.1558558259	42.3228942602	459.4803579975
127.1558682580	42.3228942602	459.3806672472
127.1558806900	42.3228942602	459.2809764970
127.1558931221	42.3228942602	459.1812857467
127.1559055541	42.3228942602	459.0815949965
127.1559179862	42.3228942602	458.9819042462
127.1559304183	42.3228942602	458.8822134960
127.1559428503	42.3228942602	458.7825209189
127.1559552824	42.3228942602	458.6828277705
127.1559677144	42.3228942602	458.5831346220
127.1559801465	42.3228942602	458.4834414737
127.1559925785	42.3228942602	458.3837483253
127.1560050106	42.3228942602	458.2840551768
127.1560174427	42.3228942602	458.1843620284
127.1560298747	42.3228942602	458.0846729941
127.1560423068	42.3228942602	457.9849846421
127.1560547388	42.3228942602	457.8852962900
127.1560671709	42.3228942602	457.7856079379
127.1560796030	42.3228942602	457.6859195858
127.1560920350	42.3228942602	457.5862312338
127.1561044671	42.3228942602	457.4865428816
127.1561168991	42.3228942602	457.3868499548
127.1561293312	42.3228942602	457.2871568064
127.1561417633	42.3228942602	457.1874636580
127.1561541953	42.3228942602	457.0877705096
127.1561666274	42.3228942602	456.9880773611
127.1561790594	42.3228942602	456.8883842127
127.1561914915	42.3228942602	456.7886913032
127.1562039236	42.3228942602	456.6890029512
127.1562163556	42.3228942602	456.5893145991
127.1562287877	42.3228942602	456.4896262470
127.1562412197	42.3228942602	456.3899378948
127.1562536518	42.3228942602	456.2902495428
127.1562660839	42.3228942602	456.1905611907
127.1562785159	42.3228942602	456.0908721391
127.1562909480	42.3228942602	455.9911789907
127.1563033800	42.3228942602	455.8914858424
127.1563158121	42.3228942602	455.7917926939
127.1563282442	42.3228942602	455.6920995455
127.1563406762	42.3228942602	455.5924063970
127.1563531083	42.3228942602	455.4927132487
127.1563655403	42.3228942602	455.3930201912
127.1563779724	42.3228942602	455.2933274188
127.1563904045	42.3228942602	455.1936346464
127.1564028365	42.3228942602	455.0939418740
127.1564152686	42.3228942602	454.9942491017
127.1564277006	42.3228942602	454.8945563293
127.1564401327	42.3228942602	454.7948635569
127.1564525647	42.3228942602	454.6951714677
127.1564649968	42.3228942602	454.5954807176
127.1564774289	42.3228942602	454.4957899673
127.1564898609	42.3228942602	454.3960992170
127.1565022930	42.3228942602	454.2964084667
127.1565147250	42.3228942602	454.1967177166
127.1565271571	42.3228942602	454.0970269663
127.1565395892	42.3228942602	453.9973351754
127.1565520212	42.3228942602	453.8976420270
127.1565644533	42.3228942602	453.7979488787
127.1565768853	42.3228942602	453.6982557302
127.1565893174	42.3228942602	453.5985625818
127.1557936656	42.3229033593	459.7400159411
127.1558060977	42.3229033593	459.6403251908
127.1558185297	42.3229033593	459.5406344406
127.1558309618	42.3229033593	459.4409436904
127.1558433938	42.3229033593	459.3412529401
127.1558558259	42.3229033593	459.2415621898
127.1558682580	42.3229033593	459.1418714396
127.1558806900	42.3229033593	459.0421806894
127.1558931221	42.3229033593	458.9424899391
127.1559055541	42.3229033593	458.8427991888
127.1559179862	42.3229033593	458.7431084386
127.1559304183	42.3229033593	458.6434176884
127.1559428503	42.3229033593	458.5437254683
127.1559552824	42.3229033593	458.4440327884
127.1559677144	42.3229033593	458.3443401086
127.1559801465	42.3229033593	458.2446474289
127.1559925785	42.3229033593	458.1449547490
127.1560050106	42.3229033593	458.0452620692
127.1560174427	42.3229033593	457.9455693893
127.1560298747	42.3229033593	457.8458800198
127.1560423068	42.3229033593	457.7461911991
127.1560547388	42.3229033593	457.6465023784
127.1560671709	42.3229033593	457.5468135577
127.1560796030	42.3229033593	457.4471247370
127.1560920350	42.3229033593	457.3474359164
127.1561044671	42.3229033593	457.2477470957
127.1561168991	42.3229033593	457.1480545941
127.1561293312	42.3229033593	457.0483619143
127.1561417633	42.3229033593	456.9486692346
127.1561541953	42.3229033593	456.8489765547
127.1561666274	42.3229033593	456.7492838749
127.1561790594	42.3229033593	456.6495911951
127.1561914915	42.3229033593	456.5498987075
127.1562039236	42.3229033593	456.4502098868
127.1562163556	42.3229033593	456.3505210661
127.1562287877	42.3229033593	456.2508322454
127.1562412197	42.3229033593	456.1511434247
127.1562536518	42.3229033593	456.0514546041
127.1562660839	42.3229033593	455.9517657834
127.1562785159	42.3229033593	455.8520763998
127.1562909480	42.3229033593	455.7523837200
127.1563033800	42.3229033593	455.6526910403
127.1563158121	42.3229033593	455.5529983604
127.1563282442	42.3229033593	455.4533056806
127.1563406762	42.3229033593	455.3536130008
127.1563531083	42.3229033593	455.2539203210
127.1563655403	42.3229033593	455.1542275055
127.1563779724	42.3229033593	455.0545342645
127.1563904045	42.3229033593	454.9548410235
127.1564028365	42.3229033593	454.8551477825
127.1564152686	42.3229033593	454.7554545416
127.1564277006	42.3229033593	454.6557613006
127.1564401327	42.3229033593	454.5560680596
127.1564525647	42.3229033593	454.4563756601
127.1564649968	42.3229033593	454.3566849099
127.1564774289	42.3229033593	454.2569941597
127.1564898609	42.3229033593	454.1573034094
127.1565022930	42.3229033593	454.0576126591
127.1565147250	42.3229033593	453.9579219089
127.1565271571	42.3229033593	453.8582311587
127.1565395892	42.3229033593	453.7585395711
127.1565520212	42.3229033593	453.6588468913
127.1565644533	42.3229033593	453.5591542116
127.1565768853	42.3229033593	453.4594615317
127.1565893174	42.3229033593	453.3597688519
127.1557936656	42.3229124584	459.5012201337
127.1558060977	42.3229124584	459.4015293834
127.1558185297	42.3229124584	459.3018386331
127.1558309618	42.3229124584	459.2021478830
127.1558433938	42.3229124584	459.1024571327
127.1558558259	42.3229124584	459.0027663824
127.1558682580	42.3229124584	458.9030756321
127.1558806900	42.3229124584	458.8033848820
127.1558931221	42.3229124584	458.7036941317
127.1559055541	42.3229124584	458.6040033814
127.1559179862	42.3229124584	458.5043126311
127.1559304183	42.3229124584	458.4046218810
127.1559428503	42.3229124584	458.3049300178
127.1559552824	42.3229124584	458.2052378065
127.1559677144	42.3229124584	458.1055455953
127.1559801465	42.3229124584	458.0058533842
127.1559925785	42.3229124584	457.9061611730
127.1560050106	42.3229124584	457.8064689617
127.1560174427	42.3229124584	457.7067767505
127.1560298747	42.3229124584	457.6070870456
127.1560423068	42.3229124584	457.5073977564
127.1560547388	42.3229124584	457.4077084671
127.1560671709	42.3229124584	457.3080191777
127.1560796030	42.3229124584	457.2083298884
127.1560920350	42.3229124584	457.1086405992
127.1561044671	42.3229124584	457.0089513099
127.1561168991	42.3229124584	456.9092592336
127.1561293312	42.3229124584	456.8095670224
127.1561417633	42.3229124584	456.7098748113
127.1561541953	42.3229124584	456.6101826001
127.1561666274	42.3229124584	456.5104903888
127.1561790594	42.3229124584	456.4107981776
127.1561914915	42.3229124584	456.3111061119
127.1562039236	42.3229124584	456.2114168227
127.1562163556	42.3229124584	456.1117275334
127.1562287877	42.3229124584	456.0120382440
127.1562412197	42.3229124584	455.9123489547
127.1562536518	42.3229124584	455.8126596655
127.1562660839	42.3229124584	455.7129703762
127.1562785159	42.3229124584	455.6132806607
127.1562909480	42.3229124584	455.5135884495
127.1563033800	42.3229124584	455.4138962384
127.1563158121	42.3229124584	455.3142040272
127.1563282442	42.3229124584	455.2145118159
127.1563406762	42.3229124584	455.1148196047
127.1563531083	42.3229124584	455.0151273936
127.1563655403	42.3229124584	454.9154348199
127.1563779724	42.3229124584	454.8157411103
127.1563904045	42.3229124584	454.7160474007
127.1564028365	42.3229124584	454.6163536911
127.1564152686	42.3229124584	454.5166599816
127.1564277006	42.3229124584	454.4169662720
127.1564401327	42.3229124584	454.3172725624
127.1564525647	42.3229124584	454.2175798527
127.1564649968	42.3229124584	454.1178891025
127.1564774289	42.3229124584	454.0181983522
127.1564898609	42.3229124584	453.9185076019
127.1565022930	42.3229124584	453.8188168517
127.1565147250	42.3229124584	453.7191261015
127.1565271571	42.3229124584	453.6194353512
127.1565395892	42.3229124584	453.5197439670
127.1565520212	42.3229124584	453.4200517558
127.1565644533	42.3229124584	453.3203595447
127.1565768853	42.3229124584	453.2206673334
127.1565893174	42.3229124584	453.1209751222
127.1557936656	42.3229215575	459.2624243261
127.1558060977	42.3229215575	459.1627335758
127.1558185297	42.3229215575	459.0630428255
127.1558309618	42.3229215575	458.9633520753
127.1558433938	42.3229215575	458.8636613251
127.1558558259	42.3229215575	458.7639705748
127.1558682580	42.3229215575	458.6642798245
127.1558806900	42.3229215575	458.5645890743
127.1558931221	42.3229215575	458.4648983240
127.1559055541	42.3229215575	458.3652075738
127.1559179862	42.3229215575	458.2655168235
127.1559304183	42.3229215575	458.1658260733
127.1559428503	42.3229215575	458.0661345671
127.1559552824	42.3229215575	457.9664428245
127.1559677144	42.3229215575	457.8667510819
127.1559801465	42.3229215575	457.7670593393
127.1559925785	42.3229215575	457.6673675967
127.1560050106	42.3229215575	457.5676758541
127.1560174427	42.3229215575	457.4679841114
127.1560298747	42.3229215575	457.3682940712
127.1560423068	42.3229215575	457.2686043134
127.1560547388	42.3229215575	457.1689145555
127.1560671709	42.3229215575	457.0692247976
127.1560796030	42.3229215575	456.9695350396
127.1560920350	42.3229215575	456.8698452818
127.1561044671	42.3229215575	456.7701555239
127.1561168991	42.3229215575	456.6704638730
127.1561293312	42.3229215575	456.5707721303
127.1561417633	42.3229215575	456.4710803878
127.1561541953	42.3229215575	456.3713886452
127.1561666274	42.3229215575	456.2716969026
127.1561790594	42.3229215575	456.1720051599
127.1561914915	42.3229215575	456.0723135162
127.1562039236	42.3229215575	455.9726237584
127.1562163556	42.3229215575	455.8729340004
127.1562287877	42.3229215575	455.7732442425
127.1562412197	42.3229215575	455.6735544846
127.1562536518	42.3229215575	455.5738647268
127.1562660839	42.3229215575	455.4741749688
127.1562785159	42.3229215575	455.3744849215
127.1562909480	42.3229215575	455.2747931788
127.1563033800	42.3229215575	455.1751014363
127.1563158121	42.3229215575	455.0754096937
127.1563282442	42.3229215575	454.9757179511
127.1563406762	42.3229215575	454.8760262084
127.1563531083	42.3229215575	454.7763344659
127.1563655403	42.3229215575	454.6766421342
127.1563779724	42.3229215575	454.5769479560
127.1563904045	42.3229215575	454.4772537778
127.1564028365	42.3229215575	454.3775595996
127.1564152686	42.3229215575	454.2778654215
127.1564277006	42.3229215575	454.1781712433
127.1564401327	42.3229215575	454.0784770650
127.1564525647	42.3229215575	453.9787840450
127.1564649968	42.3229215575	453.8790932949
127.1564774289	42.3229215575	453.7794025446
127.1564898609	42.3229215575	453.6797117943
127.1565022930	42.3229215575	453.5800210440
127.1565147250	42.3229215575	453.4803302939
127.1565271571	42.3229215575	453.3806395436
127.1565395892	42.3229215575	453.2809483627
127.1565520212	42.3229215575	453.1812566201
127.1565644533	42.3229215575	453.0815648776
127.1565768853	42.3229215575	452.9818731349
127.1565893174	42.3229215575	452.8821813923
127.1557936656	42.3229306566	459.0236285184
127.1558060977	42.3229306566	458.9239377682
127.1558185297	42.3229306566	458.8242470179
127.1558309618	42.3229306566	458.7245562677
127.1558433938	42.3229306566	458.6248655174
127.1558558259	42.3229306566	458.5251747671
127.1558682580	42.3229306566	458.4254840169
127.1558806900	42.3229306566	458.3257932667
127.1558931221	42.3229306566	458.2261025164
127.1559055541	42.3229306566	458.1264117661
127.1559179862	42.3229306566	458.0267210159
127.1559304183	42.3229306566	457.9270302657
127.1559428503	42.3229306566	457.8273391165
127.1559552824	42.3229306566	457.7276478424
127.1559677144	42.3229306566	457.6279565684
127.1559801465	42.3229306566	457.5282652945
127.1559925785	42.3229306566	457.4285740205
127.1560050106	42.3229306566	457.3288827464
127.1560174427	42.3229306566	457.2291914724
127.1560298747	42.3229306566	457.1295010969
127.1560423068	42.3229306566	457.0298108705
127.1560547388	42.3229306566	456.9301206439
127.1560671709	42.3229306566	456.8304304174
127.1560796030	42.3229306566	456.7307401909
127.1560920350	42.3229306566	456.6310499645
127.1561044671	42.3229306566	456.5313597379
127.1561168991	42.3229306566	456.4316685123
127.1561293312	42.3229306566	456.3319772383
127.1561417633	42.3229306566	456.2322859644
127.1561541953	42.3229306566	456.1325946903
127.1561666274	42.3229306566	456.0329034163
127.1561790594	42.3229306566	455.9332121423
127.1561914915	42.3229306566	455.8335209204
127.1562039236	42.3229306566	455.7338306940
127.1562163556	42.3229306566	455.6341404675
127.1562287877	42.3229306566	455.5344502410
127.1562412197	42.3229306566	455.4347600144
127.1562536518	42.3229306566	455.3350697880
127.1562660839	42.3229306566	455.2353795615
127.1562785159	42.3229306566	455.1356891822
127.1562909480	42.3229306566	455.0359979082
127.1563033800	42.3229306566	454.9363066342
127.1563158121	42.3229306566	454.8366153602
127.1563282442	42.3229306566	454.7369240862
127.1563406762	42.3229306566	454.6372328122
127.1563531083	42.3229306566	454.5375415382
127.1563655403	42.3229306566	454.4378494485
127.1563779724	42.3229306566	454.3381548017
127.1563904045	42.3229306566	454.2384601548
127.1564028365	42.3229306566	454.1387655080
127.1564152686	42.3229306566	454.0390708613
127.1564277006	42.3229306566	453.9393762145
127.1564401327	42.3229306566	453.8396815677
127.1564525647	42.3229306566	453.7399882374
127.1564649968	42.3229306566	453.6402974872
127.1564774289	42.3229306566	453.5406067370
127.1564898609	42.3229306566	453.4409159867
127.1565022930	42.3229306566	453.3412252364
127.1565147250	42.3229306566	453.2415344862
127.1565271571	42.3229306566	453.1418437360
127.1565395892	42.3229306566	453.0421527584
127.1565520212	42.3229306566	452.9424614844
127.1565644533	42.3229306566	452.8427702105
127.1565768853	42.3229306566	452.7430789365
127.1565893174	42.3229306566	452.6433876624
127.1557936656	42.3229397557	458.7848327110
127.1558060977	42.3229397557	458.6851419607
127.1558185297	42.3229397557	458.5854512104
127.1558309618	42.3229397557	458.4857604603
127.1558433938	42.3229397557	458.3860697100
127.1558558259	42.3229397557	458.2863789597
127.1558682580	42.3229397557	458.1866882094
127.1558806900	42.3229397557	458.0869974593
127.1558931221	42.3229397557	457.9873067090
127.1559055541	42.3229397557	457.8876159587
127.1559179862	42.3229397557	457.7879252084
127.1559304183	42.3229397557	457.6882344583
127.1559428503	42.3229397557	457.5885436660
127.1559552824	42.3229397557	457.4888528606
127.1559677144	42.3229397557	457.3891620551
127.1559801465	42.3229397557	457.2894712498
127.1559925785	42.3229397557	457.1897804444
127.1560050106	42.3229397557	457.0900896390
127.1560174427	42.3229397557	456.9903988336
127.1560298747	42.3229397557	456.8907081227
127.1560423068	42.3229397557	456.7910174277
127.1560547388	42.3229397557	456.6913267326
127.1560671709	42.3229397557	456.5916360374
127.1560796030	42.3229397557	456.4919453423
127.1560920350	42.3229397557	456.3922546473
127.1561044671	42.3229397557	456.2925639521
127.1561168991	42.3229397557	456.1928731518
127.1561293312	42.3229397557	456.0931823464
127.1561417633	42.3229397557	455.9934915411
127.1561541953	42.3229397557	455.8938007357
127.1561666274	42.3229397557	455.7941099302
127.1561790594	42.3229397557	455.6944191248
127.1561914915	42.3229397557	455.5947283249
127.1562039236	42.3229397557	455.4950376299
127.1562163556	42.3229397557	455.3953469347
127.1562287877	42.3229397557	455.2956562396
127.1562412197	42.3229397557	455.1959655445
127.1562536518	42.3229397557	455.0962748494
127.1562660839	42.3229397557	454.9965841543
127.1562785159	42.3229397557	454.8968934431
127.1562909480	42.3229397557	454.7972026377
127.1563033800	42.3229397557	454.6975118323
127.1563158121	42.3229397557	454.5978210269
127.1563282442	42.3229397557	454.4981302215
127.1563406762	42.3229397557	454.3984394161
127.1563531083	42.3229397557	454.2987486108
127.1563655403	42.3229397557	454.1990567629
127.1563779724	42.3229397557	454.0993616475
127.1563904045	42.3229397557	453.9996665321
127.1564028365	42.3229397557	453.8999714167
127.1564152686	42.3229397557	453.8002763014
127.1564277006	42.3229397557	453.7005811859
127.1564401327	42.3229397557	453.6008860705
127.1564525647	42.3229397557	453.5011924300
127.1564649968	42.3229397557	453.4015016798
127.1564774289	42.3229397557	453.3018109295
127.1564898609	42.3229397557	453.2021201792
127.1565022930	42.3229397557	453.1024294290
127.1565147250	42.3229397557	453.0027386788
127.1565271571	42.3229397557	452.9030479285
127.1565395892	42.3229397557	452.8033571543
127.1565520212	42.3229397557	452.7036663489
127.1565644533	42.3229397557	452.6039755436
127.1565768853	42.3229397557	452.5042847382
127.1565893174	42.3229397557	452.4045939327
127.1557936656	42.3229488548	458.5460379658
127.1558060977	42.3229488548	458.4463476290
127.1558185297	42.3229488548	458.3466572922
127.1558309618	42.3229488548	458.2469669555
127.1558433938	42.3229488548	458.1472766187
127.1558558259	42.3229488548	458.0475857314
127.1558682580	42.3229488548	457.9478945676
127.1558806900	42.3229488548	457.8482034040
127.1558931221	42.3229488548	457.7485122402
127.1559055541	42.3229488548	457.6488210765
127.1559179862	42.3229488548	457.5491299128
127.1559304183	42.3229488548	457.4494387491
127.1559428503	42.3229488548	457.3497482153
127.1559552824	42.3229488548	457.2500578785
127.1559677144	42.3229488548	457.1503675417
127.1559801465	42.3229488548	457.0506772050
127.1559925785	42.3229488548	456.9509868681
127.1560050106	42.3229488548	456.8512965313
127.1560174427	42.3229488548	456.7516061945
127.1560298747	42.3229488548	456.6519151484
127.1560423068	42.3229488548	456.5522239848
127.1560547388	42.3229488548	456.4525328210
127.1560671709	42.3229488548	456.3528416573
127.1560796030	42.3229488548	456.2531504935
127.1560920350	42.3229488548	456.1534593299
127.1561044671	42.3229488548	456.0537681662
127.1561168991	42.3229488548	455.9540777911
127.1561293312	42.3229488548	455.8543874543
127.1561417633	42.3229488548	455.7546971176
127.1561541953	42.3229488548	455.6550067808
127.1561666274	42.3229488548	455.5553164440
127.1561790594	42.3229488548	455.4556261072
127.1561914915	42.3229488548	455.3559357291
127.1562039236	42.3229488548	455.2562445655
127.1562163556	42.3229488548	455.1565534018
127.1562287877	42.3229488548	455.0568622380
127.1562412197	42.3229488548	454.9571710743
127.1562536518	42.3229488548	454.8574799107
127.1562660839	42.3229488548	454.7577887469
127.1562785159	42.3229488548	454.6580975832
127.1562909480	42.3229488548	454.5584064195
127.1563033800	42.3229488548	454.4587152558
127.1563158121	42.3229488548	454.3590240921
127.1563282442	42.3229488548	454.2593329284
127.1563406762	42.3229488548	454.1596417646
127.1563531083	42.3229488548	454.0599506010
127.1563655403	42.3229488548	453.9602584682
127.1563779724	42.3229488548	453.8605632976
127.1563904045	42.3229488548	453.7608681270
127.1564028365	42.3229488548	453.6611729565
127.1564152686	42.3229488548	453.5614777860
127.1564277006	42.3229488548	453.4617826154
127.1564401327	42.3229488548	453.3620874449
127.1564525647	42.3229488548	453.2629666702
127.1564649968	42.3229488548	453.1649715216
127.1564774289	42.3229488548	453.0669763730
127.1564898609	42.3229488548	452.9689812243
127.1565022930	42.3229488548	452.8709860757
127.1565147250	42.3229488548	452.7729909272
127.1565271571	42.3229488548	452.6749957785
127.1565395892	42.3229488548	452.5770006298
127.1565520212	42.3229488548	452.4790054812
127.1565644533	42.3229488548	452.3810103327
127.1565768853	42.3229488548	452.2830151840
127.1565893174	42.3229488548	452.1850200354
127.1557936656	42.3229579539	458.3072433624
127.1558060977	42.3229579539	458.2075534942
127.1558185297	42.3229579539	458.1078636260
127.1558309618	42.3229579539	458.0081737579
127.1558433938	42.3229579539	457.9084838897
127.1558558259	42.3229579539	457.8087928470
127.1558682580	42.3229579539	457.7091012146
127.1558806900	42.3229579539	457.6094095824
127.1558931221	42.3229579539	457.5097179501
127.1559055541	42.3229579539	457.4100263177
127.1559179862	42.3229579539	457.3103346854
127.1559304183	42.3229579539	457.2106430532
127.1559428503	42.3229579539	457.1109527646
127.1559552824	42.3229579539	457.0112628964
127.1559677144	42.3229579539	456.9115730282
127.1559801465	42.3229579539	456.8118831601
127.1559925785	42.3229579539	456.7121932919
127.1560050106	42.3229579539	456.6125034237
127.1560174427	42.3229579539	456.5128135555
127.1560298747	42.3229579539	456.4131221740
127.1560423068	42.3229579539	456.3134305418
127.1560547388	42.3229579539	456.2137389095
127.1560671709	42.3229579539	456.1140472771
127.1560796030	42.3229579539	456.0143556448
127.1560920350	42.3229579539	455.9146640125
127.1561044671	42.3229579539	455.8149723802
127.1561168991	42.3229579539	455.7152824305
127.1561293312	42.3229579539	455.6155925623
127.1561417633	42.3229579539	455.5159026942
127.1561541953	42.3229579539	455.4162128259
127.1561666274	42.3229579539	455.3165229577
127.1561790594	42.3229579539	455.2168330895
127.1561914915	42.3229579539	455.1171431334
127.1562039236	42.3229579539	455.0174515012
127.1562163556	42.3229579539	454.9177598688
127.1562287877	42.3229579539	454.8180682365
127.1562412197	42.3229579539	454.7183766042
127.1562536518	42.3229579539	454.6186849719
127.1562660839	42.3229579539	454.5189933396
127.1562785159	42.3229579539	454.4193017072
127.1562909480	42.3229579539	454.3196100749
127.1563033800	42.3229579539	454.2199184427
127.1563158121	42.3229579539	454.1202268103
127.1563282442	42.3229579539	454.0205351780
127.1563406762	42.3229579539	453.9208435456
127.1563531083	42.3229579539	453.8211519134
127.1563655403	42.3229579539	453.7214594253
127.1563779724	42.3229579539	453.6217642547
127.1563904045	42.3229579539	453.5220690842
127.1564028365	42.3229579539	453.4223739136
127.1564152686	42.3229579539	453.3226787432
127.1564277006	42.3229579539	453.2229835726
127.1564401327	42.3229579539	453.1232884020
127.1564525647	42.3229579539	453.0248169381
127.1564649968	42.3229579539	452.9287435350
127.1564774289	42.3229579539	452.8326701318
127.1564898609	42.3229579539	452.7365967286
127.1565022930	42.3229579539	452.6405233254
127.1565147250	42.3229579539	452.5444499223
127.1565271571	42.3229579539	452.4483765191
127.1565395892	42.3229579539	452.3523031158
127.1565520212	42.3229579539	452.2562297126
127.1565644533	42.3229579539	452.1601563095
127.1565768853	42.3229579539	452.0640829063
127.1565893174	42.3229579539	451.9680095031
127.1557936656	42.3229670530	458.0684487590
127.1558060977	42.3229670530	457.9687593593
127.1558185297	42.3229670530	457.8690699597
127.1558309618	42.3229670530	457.7693805602
127.1558433938	42.3229670530	457.6696911606
127.1558558259	42.3229670530	457.5699999626
127.1558682580	42.3229670530	457.4703078617
127.1558806900	42.3229670530	457.3706157609
127.1558931221	42.3229670530	457.2709236599
127.1559055541	42.3229670530	457.1712315590
127.1559179862	42.3229670530	457.0715394580
127.1559304183	42.3229670530	456.9718473572
127.1559428503	42.3229670530	456.8721573140
127.1559552824	42.3229670530	456.7724679144
127.1559677144	42.3229670530	456.6727785148
127.1559801465	42.3229670530	456.5730891153
127.1559925785	42.3229670530	456.4733997157
127.1560050106	42.3229670530	456.3737103160
127.1560174427	42.3229670530	456.2740209164
127.1560298747	42.3229670530	456.1743291997
127.1560423068	42.3229670530	456.0746370988
127.1560547388	42.3229670530	455.9749449979
127.1560671709	42.3229670530	455.8752528970
127.1560796030	42.3229670530	455.7755607960
127.1560920350	42.3229670530	455.6758686952
127.1561044671	42.3229670530	455.5761765942
127.1561168991	42.3229670530	455.4764870698
127.1561293312	42.3229670530	455.3767976702
127.1561417633	42.3229670530	455.2771082707
127.1561541953	42.3229670530	455.1774188711
127.1561666274	42.3229670530	455.0777294715
127.1561790594	42.3229670530	454.9780400719
127.1561914915	42.3229670530	454.8783505377
127.1562039236	42.3229670530	454.7786584368
127.1562163556	42.3229670530	454.6789663359
127.1562287877	42.3229670530	454.5792742349
127.1562412197	42.3229670530	454.4795821340
127.1562536518	42.3229670530	454.3798900332
127.1562660839	42.3229670530	454.2801979322
127.1562785159	42.3229670530	454.1805058313
127.1562909480	42.3229670530	454.0808137303
127.1563033800	42.3229670530	453.9811216295
127.1563158121	42.3229670530	453.8814295285
127.1563282442	42.3229670530	453.7817374276
127.1563406762	42.3229670530	453.6820453266
127.1563531083	42.3229670530	453.5823532258
127.1563655403	42.3229670530	453.4826603825
127.1563779724	42.3229670530	453.3829652119
127.1563904045	42.3229670530	453.2832700413
127.1564028365	42.3229670530	453.1835748708
127.1564152686	42.3229670530	453.0838797003
127.1564277006	42.3229670530	452.9841845297
127.1564401327	42.3229670530	452.8844893592
127.1564525647	42.3229670530	452.7866672061
127.1564649968	42.3229670530	452.6925155484
127.1564774289	42.3229670530	452.5983638906
127.1564898609	42.3229670530	452.5042122329
127.1565022930	42.3229670530	452.4100605751
127.1565147250	42.3229670530	452.3159089174
127.1565271571	42.3229670530	452.2217572596
127.1565395892	42.3229670530	452.1276056018
127.1565520212	42.3229670530	452.0334539440
127.1565644533	42.3229670530	451.9393022864
127.1565768853	42.3229670530	451.8451506286
127.1565893174	42.3229670530	451.7509989708
127.1557936656	42.3229761520	457.8296541557
127.1558060977	42.3229761520	457.7299652247
127.1558185297	42.3229761520	457.6302762937
127.1558309618	42.3229761520	457.5305873628
127.1558433938	42.3229761520	457.4308984318
127.1558558259	42.3229761520	457.3312070785
127.1558682580	42.3229761520	457.2315145089
127.1558806900	42.3229761520	457.1318219395
127.1558931221	42.3229761520	457.0321293699
127.1559055541	42.3229761520	456.9324368004
127.1559179862	42.3229761520	456.8327442308
127.1559304183	42.3229761520	456.7330516614
127.1559428503	42.3229761520	456.6333618635
127.1559552824	42.3229761520	456.5336729325
127.1559677144	42.3229761520	456.4339840015
127.1559801465	42.3229761520	456.3342950706
127.1559925785	42.3229761520	456.2346061396
127.1560050106	42.3229761520	456.1349172086
127.1560174427	42.3229761520	456.0352282776
127.1560298747	42.3229761520	455.9355362255
127.1560423068	42.3229761520	455.8358436561
127.1560547388	42.3229761520	455.7361510865
127.1560671709	42.3229761520	455.6364585170
127.1560796030	42.3229761520	455.5367659474
127.1560920350	42.3229761520	455.4370733780
127.1561044671	42.3229761520	455.3373808084
127.1561168991	42.3229761520	455.2376917093
127.1561293312	42.3229761520	455.1380027783
127.1561417633	42.3229761520	455.0383138474
127.1561541953	42.3229761520	454.9386249164
127.1561666274	42.3229761520	454.8389359854
127.1561790594	42.3229761520	454.7392470544
127.1561914915	42.3229761520	454.6395579421
127.1562039236	42.3229761520	454.5398653727
127.1562163556	42.3229761520	454.4401728031
127.1562287877	42.3229761520	454.3404802336
127.1562412197	42.3229761520	454.2407876640
127.1562536518	42.3229761520	454.1410950946
127.1562660839	42.3229761520	454.0414025250
127.1562785159	42.3229761520	453.9417099555
127.1562909480	42.3229761520	453.8420173859
127.1563033800	42.3229761520	453.7423248165
127.1563158121	42.3229761520	453.6426322469
127.1563282442	42.3229761520	453.5429396774
127.1563406762	42.3229761520	453.4432471078
127.1563531083	42.3229761520	453.3435545384
127.1563655403	42.3229761520	453.2438613398
127.1563779724	42.3229761520	453.1441661692
127.1563904045	42.3229761520	453.0444709986
127.1564028365	42.3229761520	452.9447758281
127.1564152686	42.3229761520	452.8450806576
127.1564277006	42.3229761520	452.7453854871
127.1564401327	42.3229761520	452.6456903165
127.1564525647	42.3229761520	452.5485174743
127.1564649968	42.3229761520	452.4562875620
127.1564774289	42.3229761520	452.3640576497
127.1564898609	42.3229761520	452.2718277373
127.1565022930	42.3229761520	452.1795978249
127.1565147250	42.3229761520	452.0873679127
127.1565271571	42.3229761520	451.9951380003
127.1565395892	42.3229761520	451.9029080880
127.1565520212	42.3229761520	451.8106781756
127.1565644533	42.3229761520	451.7184482634
127.1565768853	42.3229761520	451.6262183510
127.1565893174	42.3229761520	451.5339884387
127.1557936656	42.3229852511	457.5908595522
127.1558060977	42.3229852511	457.4911710898
127.1558185297	42.3229852511	457.3914826274
127.1558309618	42.3229852511	457.2917941652
127.1558433938	42.3229852511	457.1921057027
127.1558558259	42.3229852511	457.0924141941
127.1558682580	42.3229852511	456.9927211559
127.1558806900	42.3229852511	456.8930281179
127.1558931221	42.3229852511	456.7933350797
127.1559055541	42.3229852511	456.6936420416
127.1559179862	42.3229852511	456.5939490034
127.1559304183	42.3229852511	456.4942559654
127.1559428503	42.3229852511	456.3945664128
127.1559552824	42.3229852511	456.2948779504
127.1559677144	42.3229852511	456.1951894880
127.1559801465	42.3229852511	456.0955010257
127.1559925785	42.3229852511	455.9958125633
127.1560050106	42.3229852511	455.8961241009
127.1560174427	42.3229852511	455.7964356385
127.1560298747	42.3229852511	455.6967432512
127.1560423068	42.3229852511	455.5970502131
127.1560547388	42.3229852511	455.4973571750
127.1560671709	42.3229852511	455.3976641368
127.1560796030	42.3229852511	455.2979710987
127.1560920350	42.3229852511	455.1982780606
127.1561044671	42.3229852511	455.0985850225
127.1561168991	42.3229852511	454.9988963486
127.1561293312	42.3229852511	454.8992078862
127.1561417633	42.3229852511	454.7995194239
127.1561541953	42.3229852511	454.6998309615
127.1561666274	42.3229852511	454.6001424991
127.1561790594	42.3229852511	454.5004540367
127.1561914915	42.3229852511	454.4007653464
127.1562039236	42.3229852511	454.3010723083
127.1562163556	42.3229852511	454.2013792702
127.1562287877	42.3229852511	454.1016862320
127.1562412197	42.3229852511	454.0019931939
127.1562536518	42.3229852511	453.9023001558
127.1562660839	42.3229852511	453.8026071177
127.1562785159	42.3229852511	453.7029140795
127.1562909480	42.3229852511	453.6032210414
127.1563033800	42.3229852511	453.5035280033
127.1563158121	42.3229852511	453.4038349652
127.1563282442	42.3229852511	453.3041419270
127.1563406762	42.3229852511	453.2044488889
127.1563531083	42.3229852511	453.1047558508
127.1563655403	42.3229852511	453.0050622969
127.1563779724	42.3229852511	452.9053671264
127.1563904045	42.3229852511	452.8056719558
127.1564028365	42.3229852511	452.7059767852
127.1564152686	42.3229852511	452.6062816148
127.1564277006	42.3229852511	452.5065864442
127.1564401327	42.3229852511	452.4068912736
127.1564525647	42.3229852511	452.3103677422
127.1564649968	42.3229852511	452.2200595754
127.1564774289	42.3229852511	452.1297514085
127.1564898609	42.3229852511	452.0394432416
127.1565022930	42.3229852511	451.9491350746
127.1565147250	42.3229852511	451.8588269078
127.1565271571	42.3229852511	451.7685187409
127.1565395892	42.3229852511	451.6782105740
127.1565520212	42.3229852511	451.5879024071
127.1565644533	42.3229852511	451.4975942402
127.1565768853	42.3229852511	451.4072860733
127.1565893174	42.3229852511	451.3169779064
127.1557936656	42.3229943502	457.3520649488
127.1558060977	42.3229943502	457.2523769550
127.1558185297	42.3229943502	457.1526889612
127.1558309618	42.3229943502	457.0530009675
127.1558433938	42.3229943502	456.9533129737
127.1558558259	42.3229943502	456.8536213097
127.1558682580	42.3229943502	456.7539278030
127.1558806900	42.3229943502	456.6542342963
127.1558931221	42.3229943502	456.5545407896
127.1559055541	42.3229943502	456.4548472828
127.1559179862	42.3229943502	456.3551537761
127.1559304183	42.3229943502	456.2554602694
127.1559428503	42.3229943502	456.1557709622
127.1559552824	42.3229943502	456.0560829684
127.1559677144	42.3229943502	455.9563949746
127.1559801465	42.3229943502	455.8567069809
127.1559925785	42.3229943502	455.7570189871
127.1560050106	42.3229943502	455.6573309933
127.1560174427	42.3229943502	455.5576429995
127.1560298747	42.3229943502	455.4579502768
127.1560423068	42.3229943502	455.3582567702
127.1560547388	42.3229943502	455.2585632634
127.1560671709	42.3229943502	455.1588697567
127.1560796030	42.3229943502	455.0591762499
127.1560920350	42.3229943502	454.9594827432
127.1561044671	42.3229943502	454.8597892365
127.1561168991	42.3229943502	454.7601009880
127.1561293312	42.3229943502	454.6604129942
127.1561417633	42.3229943502	454.5607250005
127.1561541953	42.3229943502	454.4610370067
127.1561666274	42.3229943502	454.3613490129
127.1561790594	42.3229943502	454.2616610191
127.1561914915	42.3229943502	454.1619727507
127.1562039236	42.3229943502	454.0622792440
127.1562163556	42.3229943502	453.9625857372
127.1562287877	42.3229943502	453.8628922305
127.1562412197	42.3229943502	453.7631987237
127.1562536518	42.3229943502	453.6635052171
127.1562660839	42.3229943502	453.5638117103
127.1562785159	42.3229943502	453.4641182036
127.1562909480	42.3229943502	453.3644246968
127.1563033800	42.3229943502	453.2647311902
127.1563158121	42.3229943502	453.1650376834
127.1563282442	42.3229943502	453.0653441766
127.1563406762	42.3229943502	452.9656506699
127.1563531083	42.3229943502	452.8659571632
127.1563655403	42.3229943502	452.7662632541
127.1563779724	42.3229943502	452.6665680835
127.1563904045	42.3229943502	452.5668729129
127.1564028365	42.3229943502	452.4671777424
127.1564152686	42.3229943502	452.3674825719
127.1564277006	42.3229943502	452.2677874013
127.1564401327	42.3229943502	452.1680922308
127.1564525647	42.3229943502	452.0722180102
127.1564649968	42.3229943502	451.9838315888
127.1564774289	42.3229943502	451.8954451673
127.1564898609	42.3229943502	451.8070587458
127.1565022930	42.3229943502	451.7186723243
127.1565147250	42.3229943502	451.6302859029
127.1565271571	42.3229943502	451.5418994814
127.1565395892	42.3229943502	451.4535130600
127.1565520212	42.3229943502	451.3651266385
127.1565644533	42.3229943502	451.2767402171
127.1565768853	42.3229943502	451.1883537956
127.1565893174	42.3229943502	451.0999673741
127.1557936656	42.3230034493	457.1132703455
127.1558060977	42.3230034493	457.0135828203
127.1558185297	42.3230034493	456.9138952951
127.1558309618	42.3230034493	456.8142077701
127.1558433938	42.3230034493	456.7145202449
127.1558558259	42.3230034493	456.6148284256
127.1558682580	42.3230034493	456.5151344502
127.1558806900	42.3230034493	456.4154404750
127.1558931221	42.3230034493	456.3157464996
127.1559055541	42.3230034493	456.2160525242
127.1559179862	42.3230034493	456.1163585489
127.1559304183	42.3230034493	456.0166645736
127.1559428503	42.3230034493	455.9169755117
127.1559552824	42.3230034493	455.8172879865
127.1559677144	42.3230034493	455.7176004613
127.1559801465	42.3230034493	455.6179129362
127.1559925785	42.3230034493	455.5182254110
127.1560050106	42.3230034493	455.4185378858
127.1560174427	42.3230034493	455.3188503606
127.1560298747	42.3230034493	455.2191573027
127.1560423068	42.3230034493	455.1194633274
127.1560547388	42.3230034493	455.0197693520
127.1560671709	42.3230034493	454.9200753767
127.1560796030	42.3230034493	454.8203814013
127.1560920350	42.3230034493	454.7206874261
127.1561044671	42.3230034493	454.6209934507
127.1561168991	42.3230034493	454.5213056275
127.1561293312	42.3230034493	454.4216181023
127.1561417633	42.3230034493	454.3219305772
127.1561541953	42.3230034493	454.2222430520
127.1561666274	42.3230034493	454.1225555268
127.1561790594	42.3230034493	454.0228680016
127.1561914915	42.3230034493	453.9231801551
127.1562039236	42.3230034493	453.8234861799
127.1562163556	42.3230034493	453.7237922045
127.1562287877	42.3230034493	453.6240982291
127.1562412197	42.3230034493	453.5244042538
127.1562536518	42.3230034493	453.4247102785
127.1562660839	42.3230034493	453.3250163031
127.1562785159	42.3230034493	453.2253223278
127.1562909480	42.3230034493	453.1256283524
127.1563033800	42.3230034493	453.0259343772
127.1563158121	42.3230034493	452.9262404018
127.1563282442	42.3230034493	452.8265464264
127.1563406762	42.3230034493	452.7268524511
127.1563531083	42.3230034493	452.6271584758
127.1563655403	42.3230034493	452.5274642114
127.1563779724	42.3230034493	452.4277690408
127.1563904045	42.3230034493	452.3280738703
127.1564028365	42.3230034493	452.2283786997
127.1564152686	42.3230034493	452.1286835292
127.1564277006	42.3230034493	452.0289883587
127.1564401327	42.3230034493	451.9292931881
127.1564525647	42.3230034493	451.8340682783
127.1564649968	42.3230034493	451.7476036024
127.1564774289	42.3230034493	451.6611389263
127.1564898609	42.3230034493	451.5746742503
127.1565022930	42.3230034493	451.4882095742
127.1565147250	42.3230034493	451.4017448982
127.1565271571	42.3230034493	451.3152802222
127.1565395892	42.3230034493	451.2288155461
127.1565520212	42.3230034493	451.1423508701
127.1565644533	42.3230034493	451.0558861941
127.1565768853	42.3230034493	450.9694215180
127.1565893174	42.3230034493	450.8829568420
127.1557936656	42.3230125484	456.8744757421
127.1558060977	42.3230125484	456.7747886855
127.1558185297	42.3230125484	456.6751016289
127.1558309618	42.3230125484	456.5754145724
127.1558433938	42.3230125484	456.4757275158
127.1558558259	42.3230125484	456.3760355412
127.1558682580	42.3230125484	456.2763410972
127.1558806900	42.3230125484	456.1766466534
127.1558931221	42.3230125484	456.0769522094
127.1559055541	42.3230125484	455.9772577655
127.1559179862	42.3230125484	455.8775633215
127.1559304183	42.3230125484	455.7778688776
127.1559428503	42.3230125484	455.6781800610
127.1559552824	42.3230125484	455.5784930044
127.1559677144	42.3230125484	455.4788059479
127.1559801465	42.3230125484	455.3791188914
127.1559925785	42.3230125484	455.2794318348
127.1560050106	42.3230125484	455.1797447782
127.1560174427	42.3230125484	455.0800577216
127.1560298747	42.3230125484	454.9803643283
127.1560423068	42.3230125484	454.8806698845
127.1560547388	42.3230125484	454.7809754405
127.1560671709	42.3230125484	454.6812809965
127.1560796030	42.3230125484	454.5815865525
127.1560920350	42.3230125484	454.4818921087
127.1561044671	42.3230125484	454.3821976647
127.1561168991	42.3230125484	454.2825102668
127.1561293312	42.3230125484	454.1828232102
127.1561417633	42.3230125484	454.0831361537
127.1561541953	42.3230125484	453.9834490971
127.1561666274	42.3230125484	453.8837620406
127.1561790594	42.3230125484	453.7840749840
127.1561914915	42.3230125484	453.6843875594
127.1562039236	42.3230125484	453.5846931155
127.1562163556	42.3230125484	453.4849986715
127.1562287877	42.3230125484	453.3853042276
127.1562412197	42.3230125484	453.2856097836
127.1562536518	42.3230125484	453.1859153398
127.1562660839	42.3230125484	453.0862208958
127.1562785159	42.3230125484	452.9865264518
127.1562909480	42.3230125484	452.8868320078
127.1563033800	42.3230125484	452.7871375640
127.1563158121	42.3230125484	452.6874431200
127.1563282442	42.3230125484	452.5877486761
127.1563406762	42.3230125484	452.4880542321
127.1563531083	42.3230125484	452.3883597882
127.1563655403	42.3230125484	452.2886651685
127.1563779724	42.3230125484	452.1889699980
127.1563904045	42.3230125484	452.0892748274
127.1564028365	42.3230125484	451.9895796568
127.1564152686	42.3230125484	451.8898844864
127.1564277006	42.3230125484	451.7901893158
127.1564401327	42.3230125484	451.6904941452
127.1564525647	42.3230125484	451.5959185463
127.1564649968	42.3230125484	451.5113756158
127.1564774289	42.3230125484	451.4268326851
127.1564898609	42.3230125484	451.3422897545
127.1565022930	42.3230125484	451.2577468239
127.1565147250	42.3230125484	451.1732038934
127.1565271571	42.3230125484	451.0886609627
127.1565395892	42.3230125484	451.0041180321
127.1565520212	42.3230125484	450.9195751015
127.1565644533	42.3230125484	450.8350321710
127.1565768853	42.3230125484	450.7504892403
127.1565893174	42.3230125484	450.6659463097
127.1557936656	42.3230216475	456.6356811386
127.1558060977	42.3230216475	456.5359945507
127.1558185297	42.3230216475	456.4363079627
127.1558309618	42.3230216475	456.3366213748
127.1558433938	42.3230216475	456.2369347868
127.1558558259	42.3230216475	456.1372426569
127.1558682580	42.3230216475	456.0375477443
127.1558806900	42.3230216475	455.9378528318
127.1558931221	42.3230216475	455.8381579193
127.1559055541	42.3230216475	455.7384630067
127.1559179862	42.3230216475	455.6387680941
127.1559304183	42.3230216475	455.5390731816
127.1559428503	42.3230216475	455.4393846104
127.1559552824	42.3230216475	455.3396980224
127.1559677144	42.3230216475	455.2400114344
127.1559801465	42.3230216475	455.1403248465
127.1559925785	42.3230216475	455.0406382585
127.1560050106	42.3230216475	454.9409516706
127.1560174427	42.3230216475	454.8412650826
127.1560298747	42.3230216475	454.7415713540
127.1560423068	42.3230216475	454.6418764415
127.1560547388	42.3230216475	454.5421815289
127.1560671709	42.3230216475	454.4424866164
127.1560796030	42.3230216475	454.3427917038
127.1560920350	42.3230216475	454.2430967913
127.1561044671	42.3230216475	454.1434018788
127.1561168991	42.3230216475	454.0437149061
127.1561293312	42.3230216475	453.9440283181
127.1561417633	42.3230216475	453.8443417303
127.1561541953	42.3230216475	453.7446551423
127.1561666274	42.3230216475	453.6449685543
127.1561790594	42.3230216475	453.5452819663
127.1561914915	42.3230216475	453.4455949636
127.1562039236	42.3230216475	453.3459000512
127.1562163556	42.3230216475	453.2462051386
127.1562287877	42.3230216475	453.1465102260
127.1562412197	42.3230216475	453.0468153135
127.1562536518	42.3230216475	452.9471204010
127.1562660839	42.3230216475	452.8474254884
127.1562785159	42.3230216475	452.7477305759
127.1562909480	42.3230216475	452.6480356633
127.1563033800	42.3230216475	452.5483407508
127.1563158121	42.3230216475	452.4486458382
127.1563282442	42.3230216475	452.3489509257
127.1563406762	42.3230216475	452.2492560131
127.1563531083	42.3230216475	452.1495611006
127.1563655403	42.3230216475	452.0498661257
127.1563779724	42.3230216475	451.9501709551
127.1563904045	42.3230216475	451.8504757845
[truncated: 4,306 more rows]
