# Supplementary material for: Simulation Study on Coverage Path Planning of Autonomous Tasks in Hilly Farmland Based on Energy Consumption Model
Source: Hindawi journal article supplement (doi:10.1155/2020/4535734), 2020-08-30
Supplement: f1 [file 4535734.f1.zip › 4535734.f1/Algorithm-pathplanning-matlab/2020.04.25/0404/2.csv]

Longitude	Latitude	Elevation
127.1563354641	42.3236221877	0.0000000000
127.1561832063	42.3235208507	0.0000000000
127.1561710443	42.3234213331	0.0000000000
127.1559464886	42.3231091235	0.0000000000
127.1558499045	42.3230301417	0.0000000000
127.1557936656	42.3229240705	0.0000000000
127.1558444387	42.3227702552	0.0000000000
127.1559060868	42.3227486747	0.0000000000
127.1564666771	42.3231555526	0.0000000000
127.1564490720	42.3232141933	0.0000000000
127.1565601319	42.3232528262	0.0000000000
127.1565893174	42.3233304989	0.0000000000
127.1563354641	42.3236221877	0.0000000000
