# Supplementary material for: Simulation Study on Coverage Path Planning of Autonomous Tasks in Hilly Farmland Based on Energy Consumption Model
Source: Hindawi journal article supplement (doi:10.1155/2020/4535734), 2020-08-30
Supplement: f1 [file 4535734.f1.zip › 4535734.f1/Algorithm-pathplanning-matlab/2020.04.25/0505/1.csv]

Longitude	Latitude	Elevation
127.1562914584	42.3226723029	461.8443500751
127.1563038890	42.3226723029	461.7421126778
127.1563163196	42.3226723029	461.6398752804
127.1563287503	42.3226723029	461.5376378832
127.1563411809	42.3226723029	461.4354004859
127.1563536115	42.3226723029	461.3331630885
127.1563660421	42.3226723029	461.2309255310
127.1563784727	42.3226723029	461.1286875656
127.1563909034	42.3226723029	461.0264496002
127.1564033340	42.3226723029	460.9242116348
127.1564157646	42.3226723029	460.8219736694
127.1564281952	42.3226723029	460.7197357041
127.1564406258	42.3226723029	460.6174977387
127.1564530565	42.3226723029	460.5162256307
127.1564654871	42.3226723029	460.4165464227
127.1564779177	42.3226723029	460.3168672145
127.1564903483	42.3226723029	460.2171880064
127.1565027789	42.3226723029	460.1175087982
127.1565152096	42.3226723029	460.0178295901
127.1565276402	42.3226723029	459.9181503820
127.1565400708	42.3226723029	459.8184711739
127.1565525014	42.3226723029	459.7187919657
127.1565649320	42.3226723029	459.6191127577
127.1565773627	42.3226723029	459.5194335495
127.1565897933	42.3226723029	459.4197543414
127.1566022239	42.3226723029	459.3200751332
127.1566146545	42.3226723029	459.2203959250
127.1566270851	42.3226723029	459.1207142070
127.1566395158	42.3226723029	459.0210305790
127.1566519464	42.3226723029	458.9213469511
127.1566643770	42.3226723029	458.8216633233
127.1566768076	42.3226723029	458.7219796953
127.1566892382	42.3226723029	458.6222960674
127.1567016689	42.3226723029	458.5226124395
127.1567140995	42.3226723029	458.4229288115
127.1567265301	42.3226723029	458.3232451837
127.1567389607	42.3226723029	458.2235615558
127.1567513913	42.3226723029	458.1238779279
127.1567638220	42.3226723029	458.0241943000
127.1567762526	42.3226723029	457.9245106721
127.1567886832	42.3226723029	457.8248270442
127.1568011138	42.3226723029	457.7251467680
127.1568135444	42.3226723029	457.6254675598
127.1568259751	42.3226723029	457.5257883518
127.1568384057	42.3226723029	457.4261091436
127.1568508363	42.3226723029	457.3264299355
127.1568632669	42.3226723029	457.2267507274
127.1568756975	42.3226723029	457.1270715193
127.1568881282	42.3226723029	457.0273923111
127.1569005588	42.3226723029	456.9277131030
127.1569129894	42.3226723029	456.8280338948
127.1569254200	42.3226723029	456.7283546868
127.1569378506	42.3226723029	456.6286754786
127.1569502813	42.3226723029	456.5289962705
127.1569627119	42.3226723029	456.4293170624
127.1569751425	42.3226723029	456.3296378543
127.1569875731	42.3226723029	456.2299586461
127.1570000037	42.3226723029	456.1302794379
127.1570124344	42.3226723029	456.0306002298
127.1570248650	42.3226723029	455.9309210217
127.1570372956	42.3226723029	455.8312418136
127.1570497262	42.3226723029	455.7315625804
127.1570621568	42.3226723029	455.6318828043
127.1570745875	42.3226723029	455.5322030281
127.1570870181	42.3226723029	455.4325232519
127.1570994487	42.3226723029	455.3328434757
127.1571118793	42.3226723029	455.2331636995
127.1571243099	42.3226723029	455.1334839234
127.1571367406	42.3226723029	455.0360030549
127.1571491712	42.3226723029	454.9521159034
127.1571616018	42.3226723029	454.8682287519
127.1571740324	42.3226723029	454.7843416004
127.1571864630	42.3226723029	454.7004544489
127.1571988937	42.3226723029	454.6165672974
127.1572113243	42.3226723029	454.5326801459
127.1572237549	42.3226723029	454.4487929945
127.1572361855	42.3226723029	454.3649058429
127.1572486161	42.3226723029	454.2810186914
127.1572610468	42.3226723029	454.1971315400
127.1572734774	42.3226723029	454.1132443885
127.1572859080	42.3226723029	454.0293572370
127.1562914584	42.3226814546	461.6011241890
127.1563038890	42.3226814546	461.4991280768
127.1563163196	42.3226814546	461.3971319645
127.1563287503	42.3226814546	461.2951358524
127.1563411809	42.3226814546	461.1931397401
127.1563536115	42.3226814546	461.0911436279
127.1563660421	42.3226814546	460.9891474884
127.1563784727	42.3226814546	460.8871512794
127.1563909034	42.3226814546	460.7851550704
127.1564033340	42.3226814546	460.6831588613
127.1564157646	42.3226814546	460.5811626523
127.1564281952	42.3226814546	460.4791664433
127.1564406258	42.3226814546	460.3771702343
127.1564530565	42.3226814546	460.2760486266
127.1564654871	42.3226814546	460.1763694185
127.1564779177	42.3226814546	460.0766902104
127.1564903483	42.3226814546	459.9770110022
127.1565027789	42.3226814546	459.8773317941
127.1565152096	42.3226814546	459.7776525859
127.1565276402	42.3226814546	459.6779733779
127.1565400708	42.3226814546	459.5782941697
127.1565525014	42.3226814546	459.4786149616
127.1565649320	42.3226814546	459.3789357535
127.1565773627	42.3226814546	459.2792565454
127.1565897933	42.3226814546	459.1795773372
127.1566022239	42.3226814546	459.0798981290
127.1566146545	42.3226814546	458.9802189209
127.1566270851	42.3226814546	458.8805372028
127.1566395158	42.3226814546	458.7808535749
127.1566519464	42.3226814546	458.6811699469
127.1566643770	42.3226814546	458.5814863191
127.1566768076	42.3226814546	458.4818026912
127.1566892382	42.3226814546	458.3821190633
127.1567016689	42.3226814546	458.2824354353
127.1567140995	42.3226814546	458.1827518074
127.1567265301	42.3226814546	458.0830681796
127.1567389607	42.3226814546	457.9833845516
127.1567513913	42.3226814546	457.8837009237
127.1567638220	42.3226814546	457.7840172959
127.1567762526	42.3226814546	457.6843336680
127.1567886832	42.3226814546	457.5846500400
127.1568011138	42.3226814546	457.4849697638
127.1568135444	42.3226814546	457.3852905557
127.1568259751	42.3226814546	457.2856113476
127.1568384057	42.3226814546	457.1859321395
127.1568508363	42.3226814546	457.0862529313
127.1568632669	42.3226814546	456.9865737233
127.1568756975	42.3226814546	456.8868945151
127.1568881282	42.3226814546	456.7872153070
127.1569005588	42.3226814546	456.6875360988
127.1569129894	42.3226814546	456.5878568907
127.1569254200	42.3226814546	456.4881776826
127.1569378506	42.3226814546	456.3884984745
127.1569502813	42.3226814546	456.2888192663
127.1569627119	42.3226814546	456.1891400583
127.1569751425	42.3226814546	456.0894608501
127.1569875731	42.3226814546	455.9897816419
127.1570000037	42.3226814546	455.8901024338
127.1570124344	42.3226814546	455.7904232256
127.1570248650	42.3226814546	455.6907440176
127.1570372956	42.3226814546	455.5910648094
127.1570497262	42.3226814546	455.4913855970
127.1570621568	42.3226814546	455.3917062922
127.1570745875	42.3226814546	455.2920269872
127.1570870181	42.3226814546	455.1923476823
127.1570994487	42.3226814546	455.0926683773
127.1571118793	42.3226814546	454.9929890724
127.1571243099	42.3226814546	454.8933097675
127.1571367406	42.3226814546	454.7960983324
127.1571491712	42.3226814546	454.7141433467
127.1571616018	42.3226814546	454.6321883610
127.1571740324	42.3226814546	454.5502333753
127.1571864630	42.3226814546	454.4682783896
127.1571988937	42.3226814546	454.3863234038
127.1572113243	42.3226814546	454.3043684181
127.1572237549	42.3226814546	454.2224134324
127.1572361855	42.3226814546	454.1404584467
127.1572486161	42.3226814546	454.0585034609
127.1572610468	42.3226814546	453.9765484753
127.1572734774	42.3226814546	453.8945934896
127.1572859080	42.3226814546	453.8126385038
127.1562914584	42.3226906063	461.3578987472
127.1563038890	42.3226906063	461.2561442945
127.1563163196	42.3226906063	461.1543898418
127.1563287503	42.3226906063	461.0526353893
127.1563411809	42.3226906063	460.9508809366
127.1563536115	42.3226906063	460.8491264839
127.1563660421	42.3226906063	460.7473720313
127.1563784727	42.3226906063	460.6456175786
127.1563909034	42.3226906063	460.5438631259
127.1564033340	42.3226906063	460.4421086732
127.1564157646	42.3226906063	460.3403542206
127.1564281952	42.3226906063	460.2385997680
127.1564406258	42.3226906063	460.1368453153
127.1564530565	42.3226906063	460.0358740665
127.1564654871	42.3226906063	459.9361944840
127.1564779177	42.3226906063	459.8365149014
127.1564903483	42.3226906063	459.7368353187
127.1565027789	42.3226906063	459.6371557361
127.1565152096	42.3226906063	459.5374761535
127.1565276402	42.3226906063	459.4377965710
127.1565400708	42.3226906063	459.3381171654
127.1565525014	42.3226906063	459.2384379572
127.1565649320	42.3226906063	459.1387587492
127.1565773627	42.3226906063	459.0390795410
127.1565897933	42.3226906063	458.9394003329
127.1566022239	42.3226906063	458.8397211247
127.1566146545	42.3226906063	458.7400419166
127.1566270851	42.3226906063	458.6403604111
127.1566395158	42.3226906063	458.5406771577
127.1566519464	42.3226906063	458.4409939042
127.1566643770	42.3226906063	458.3413106508
127.1566768076	42.3226906063	458.2416273974
127.1566892382	42.3226906063	458.1419441439
127.1567016689	42.3226906063	458.0422608904
127.1567140995	42.3226906063	457.9425773886
127.1567265301	42.3226906063	457.8428937608
127.1567389607	42.3226906063	457.7432101329
127.1567513913	42.3226906063	457.6435265050
127.1567638220	42.3226906063	457.5438428771
127.1567762526	42.3226906063	457.4441592492
127.1567886832	42.3226906063	457.3444756213
127.1568011138	42.3226906063	457.2447950611
127.1568135444	42.3226906063	457.1451154785
127.1568259751	42.3226906063	457.0454358960
127.1568384057	42.3226906063	456.9457563134
127.1568508363	42.3226906063	456.8460767308
127.1568632669	42.3226906063	456.7463971482
127.1568756975	42.3226906063	456.6467175656
127.1568881282	42.3226906063	456.5470383026
127.1569005588	42.3226906063	456.4473590945
127.1569129894	42.3226906063	456.3476798863
127.1569254200	42.3226906063	456.2480006783
127.1569378506	42.3226906063	456.1483214701
127.1569502813	42.3226906063	456.0486422620
127.1569627119	42.3226906063	455.9489630539
127.1569751425	42.3226906063	455.8492838458
127.1569875731	42.3226906063	455.7496046376
127.1570000037	42.3226906063	455.6499254295
127.1570124344	42.3226906063	455.5502462213
127.1570248650	42.3226906063	455.4505670133
127.1570372956	42.3226906063	455.3508878051
127.1570497262	42.3226906063	455.2512085969
127.1570621568	42.3226906063	455.1515293889
127.1570745875	42.3226906063	455.0518501807
127.1570870181	42.3226906063	454.9521709726
127.1570994487	42.3226906063	454.8524917644
127.1571118793	42.3226906063	454.7528125563
127.1571243099	42.3226906063	454.6531333482
127.1571367406	42.3226906063	454.5561910242
127.1571491712	42.3226906063	454.4761682042
127.1571616018	42.3226906063	454.3961453843
127.1571740324	42.3226906063	454.3161225644
127.1571864630	42.3226906063	454.2360997444
127.1571988937	42.3226906063	454.1560769244
127.1572113243	42.3226906063	454.0760541045
127.1572237549	42.3226906063	453.9960313724
127.1572361855	42.3226906063	453.9160089269
127.1572486161	42.3226906063	453.8359864814
127.1572610468	42.3226906063	453.7559640360
127.1572734774	42.3226906063	453.6759415905
127.1572859080	42.3226906063	453.5959191450
127.1562914584	42.3226997581	461.1146734205
127.1563038890	42.3226997581	461.0131607242
127.1563163196	42.3226997581	460.9116480278
127.1563287503	42.3226997581	460.8101353316
127.1563411809	42.3226997581	460.7086226353
127.1563536115	42.3226997581	460.6071099389
127.1563660421	42.3226997581	460.5055972427
127.1563784727	42.3226997581	460.4040845464
127.1563909034	42.3226997581	460.3025718501
127.1564033340	42.3226997581	460.2010591537
127.1564157646	42.3226997581	460.0995464574
127.1564281952	42.3226997581	459.9980337612
127.1564406258	42.3226997581	459.8965210648
127.1564530565	42.3226997581	459.7957001384
127.1564654871	42.3226997581	459.6960200846
127.1564779177	42.3226997581	459.5963400307
127.1564903483	42.3226997581	459.4966599769
127.1565027789	42.3226997581	459.3969799230
127.1565152096	42.3226997581	459.2972998691
127.1565276402	42.3226997581	459.1976198153
127.1565400708	42.3226997581	459.0979401612
127.1565525014	42.3226997581	458.9982609531
127.1565649320	42.3226997581	458.8985817450
127.1565773627	42.3226997581	458.7989025369
127.1565897933	42.3226997581	458.6992233287
127.1566022239	42.3226997581	458.5995441206
127.1566146545	42.3226997581	458.4998649124
127.1566270851	42.3226997581	458.4001836746
127.1566395158	42.3226997581	458.3005008924
127.1566519464	42.3226997581	458.2008181102
127.1566643770	42.3226997581	458.1011353281
127.1566768076	42.3226997581	458.0014525459
127.1566892382	42.3226997581	457.9017697637
127.1567016689	42.3226997581	457.8020869815
127.1567140995	42.3226997581	457.7024036384
127.1567265301	42.3226997581	457.6027200106
127.1567389607	42.3226997581	457.5030363827
127.1567513913	42.3226997581	457.4033527548
127.1567638220	42.3226997581	457.3036691269
127.1567762526	42.3226997581	457.2039854990
127.1567886832	42.3226997581	457.1043018711
127.1568011138	42.3226997581	457.0046209535
127.1568135444	42.3226997581	456.9049408997
127.1568259751	42.3226997581	456.8052608459
127.1568384057	42.3226997581	456.7055807920
127.1568508363	42.3226997581	456.6059007381
127.1568632669	42.3226997581	456.5062206844
127.1568756975	42.3226997581	456.4065406305
127.1568881282	42.3226997581	456.3068612985
127.1569005588	42.3226997581	456.2071820903
127.1569129894	42.3226997581	456.1075028822
127.1569254200	42.3226997581	456.0078236741
127.1569378506	42.3226997581	455.9081444660
127.1569502813	42.3226997581	455.8084652578
127.1569627119	42.3226997581	455.7087860498
127.1569751425	42.3226997581	455.6091068416
127.1569875731	42.3226997581	455.5094276335
127.1570000037	42.3226997581	455.4097484253
127.1570124344	42.3226997581	455.3100692171
127.1570248650	42.3226997581	455.2103900091
127.1570372956	42.3226997581	455.1107108009
127.1570497262	42.3226997581	455.0110315928
127.1570621568	42.3226997581	454.9113523847
127.1570745875	42.3226997581	454.8116731766
127.1570870181	42.3226997581	454.7119939684
127.1570994487	42.3226997581	454.6123147603
127.1571118793	42.3226997581	454.5126355521
127.1571243099	42.3226997581	454.4129563441
127.1571367406	42.3226997581	454.3162830478
127.1571491712	42.3226997581	454.2381923936
127.1571616018	42.3226997581	454.1601017395
127.1571740324	42.3226997581	454.0820110853
127.1571864630	42.3226997581	454.0039204311
127.1571988937	42.3226997581	453.9258297769
127.1572113243	42.3226997581	453.8477391227
127.1572237549	42.3226997581	453.7696486669
127.1572361855	42.3226997581	453.6915588585
127.1572486161	42.3226997581	453.6134690500
127.1572610468	42.3226997581	453.5353792416
127.1572734774	42.3226997581	453.4572894332
127.1572859080	42.3226997581	453.3791996247
127.1562914584	42.3227089098	460.8714480938
127.1563038890	42.3227089098	460.7701771538
127.1563163196	42.3227089098	460.6689062138
127.1563287503	42.3227089098	460.5676352740
127.1563411809	42.3227089098	460.4663643340
127.1563536115	42.3227089098	460.3650933940
127.1563660421	42.3227089098	460.2638224541
127.1563784727	42.3227089098	460.1625515142
127.1563909034	42.3227089098	460.0612805742
127.1564033340	42.3227089098	459.9600096342
127.1564157646	42.3227089098	459.8587386942
127.1564281952	42.3227089098	459.7574677543
127.1564406258	42.3227089098	459.6561968143
127.1564530565	42.3227089098	459.5555262103
127.1564654871	42.3227089098	459.4558456853
127.1564779177	42.3227089098	459.3561651601
127.1564903483	42.3227089098	459.2564846350
127.1565027789	42.3227089098	459.1568041099
127.1565152096	42.3227089098	459.0571235847
127.1565276402	42.3227089098	458.9574430597
127.1565400708	42.3227089098	458.8577631571
127.1565525014	42.3227089098	458.7580839489
127.1565649320	42.3227089098	458.6584047409
127.1565773627	42.3227089098	458.5587255327
127.1565897933	42.3227089098	458.4590463246
127.1566022239	42.3227089098	458.3593671164
127.1566146545	42.3227089098	458.2596879082
127.1566270851	42.3227089098	458.1600069381
127.1566395158	42.3227089098	458.0603246271
127.1566519464	42.3227089098	457.9606423162
127.1566643770	42.3227089098	457.8609600054
127.1566768076	42.3227089098	457.7612776944
127.1566892382	42.3227089098	457.6615953835
127.1567016689	42.3227089098	457.5619130725
127.1567140995	42.3227089098	457.4622298882
127.1567265301	42.3227089098	457.3625462604
127.1567389607	42.3227089098	457.2628626325
127.1567513913	42.3227089098	457.1631790045
127.1567638220	42.3227089098	457.0634953767
127.1567762526	42.3227089098	456.9638117488
127.1567886832	42.3227089098	456.8641281209
127.1568011138	42.3227089098	456.7644468459
127.1568135444	42.3227089098	456.6647663208
127.1568259751	42.3227089098	456.5650857958
127.1568384057	42.3227089098	456.4654052706
127.1568508363	42.3227089098	456.3657247455
127.1568632669	42.3227089098	456.2660442205
127.1568756975	42.3227089098	456.1663636953
127.1568881282	42.3227089098	456.0666842943
127.1569005588	42.3227089098	455.9670050862
127.1569129894	42.3227089098	455.8673258780
127.1569254200	42.3227089098	455.7676466700
127.1569378506	42.3227089098	455.6679674618
127.1569502813	42.3227089098	455.5682882537
127.1569627119	42.3227089098	455.4686090456
127.1569751425	42.3227089098	455.3689298375
127.1569875731	42.3227089098	455.2692506293
127.1570000037	42.3227089098	455.1695714211
127.1570124344	42.3227089098	455.0698922130
127.1570248650	42.3227089098	454.9702130049
127.1570372956	42.3227089098	454.8705337968
127.1570497262	42.3227089098	454.7708545886
127.1570621568	42.3227089098	454.6711753806
127.1570745875	42.3227089098	454.5714961724
127.1570870181	42.3227089098	454.4718169643
127.1570994487	42.3227089098	454.3721377561
127.1571118793	42.3227089098	454.2724585480
127.1571243099	42.3227089098	454.1727793399
127.1571367406	42.3227089098	454.0763750714
127.1571491712	42.3227089098	454.0002165829
127.1571616018	42.3227089098	453.9240580946
127.1571740324	42.3227089098	453.8478996062
127.1571864630	42.3227089098	453.7717411178
127.1571988937	42.3227089098	453.6955826294
127.1572113243	42.3227089098	453.6194241410
127.1572237549	42.3227089098	453.5432659614
127.1572361855	42.3227089098	453.4671087900
127.1572486161	42.3227089098	453.3909516186
127.1572610468	42.3227089098	453.3147944472
127.1572734774	42.3227089098	453.2386372758
127.1572859080	42.3227089098	453.1624801044
127.1562914584	42.3227180615	460.6282227669
127.1563038890	42.3227180615	460.5271935833
127.1563163196	42.3227180615	460.4261643997
127.1563287503	42.3227180615	460.3251352161
127.1563411809	42.3227180615	460.2241060325
127.1563536115	42.3227180615	460.1230768489
127.1563660421	42.3227180615	460.0220476654
127.1563784727	42.3227180615	459.9210184817
127.1563909034	42.3227180615	459.8199892981
127.1564033340	42.3227180615	459.7189601145
127.1564157646	42.3227180615	459.6179309308
127.1564281952	42.3227180615	459.5169017473
127.1564406258	42.3227180615	459.4158725637
127.1564530565	42.3227180615	459.3153522820
127.1564654871	42.3227180615	459.2156712857
127.1564779177	42.3227180615	459.1159902893
127.1564903483	42.3227180615	459.0163092929
127.1565027789	42.3227180615	458.9166282965
127.1565152096	42.3227180615	458.8169473001
127.1565276402	42.3227180615	458.7172663038
127.1565400708	42.3227180615	458.6175861527
127.1565525014	42.3227180615	458.5179069446
127.1565649320	42.3227180615	458.4182277365
127.1565773627	42.3227180615	458.3185485284
127.1565897933	42.3227180615	458.2188693202
127.1566022239	42.3227180615	458.1191901121
127.1566146545	42.3227180615	458.0195109039
127.1566270851	42.3227180615	457.9198302014
127.1566395158	42.3227180615	457.8201483617
127.1566519464	42.3227180615	457.7204665220
127.1566643770	42.3227180615	457.6207846824
127.1566768076	42.3227180615	457.5211028427
127.1566892382	42.3227180615	457.4214210031
127.1567016689	42.3227180615	457.3217391634
127.1567140995	42.3227180615	457.2220561378
127.1567265301	42.3227180615	457.1223725100
127.1567389607	42.3227180615	457.0226888821
127.1567513913	42.3227180615	456.9230052542
127.1567638220	42.3227180615	456.8233216263
127.1567762526	42.3227180615	456.7236379984
127.1567886832	42.3227180615	456.6239543705
127.1568011138	42.3227180615	456.5242727382
127.1568135444	42.3227180615	456.4245917418
127.1568259751	42.3227180615	456.3249107455
127.1568384057	42.3227180615	456.2252297491
127.1568508363	42.3227180615	456.1255487527
127.1568632669	42.3227180615	456.0258677564
127.1568756975	42.3227180615	455.9261867600
127.1568881282	42.3227180615	455.8265072900
127.1569005588	42.3227180615	455.7268280818
127.1569129894	42.3227180615	455.6271488737
127.1569254200	42.3227180615	455.5274696656
127.1569378506	42.3227180615	455.4277904575
127.1569502813	42.3227180615	455.3281112493
127.1569627119	42.3227180615	455.2284320413
127.1569751425	42.3227180615	455.1287528331
127.1569875731	42.3227180615	455.0290736250
127.1570000037	42.3227180615	454.9293944168
127.1570124344	42.3227180615	454.8297152087
127.1570248650	42.3227180615	454.7300360006
127.1570372956	42.3227180615	454.6303567925
127.1570497262	42.3227180615	454.5306775843
127.1570621568	42.3227180615	454.4309983763
127.1570745875	42.3227180615	454.3313191681
127.1570870181	42.3227180615	454.2316399599
127.1570994487	42.3227180615	454.1319607518
127.1571118793	42.3227180615	454.0322815436
127.1571243099	42.3227180615	453.9326023356
127.1571367406	42.3227180615	453.8364670948
127.1571491712	42.3227180615	453.7622407721
127.1571616018	42.3227180615	453.6880144496
127.1571740324	42.3227180615	453.6137881269
127.1571864630	42.3227180615	453.5395618043
127.1571988937	42.3227180615	453.4653354817
127.1572113243	42.3227180615	453.3911091590
127.1572237549	42.3227180615	453.3168832558
127.1572361855	42.3227180615	453.2426587214
127.1572486161	42.3227180615	453.1684341870
127.1572610468	42.3227180615	453.0942096527
127.1572734774	42.3227180615	453.0199851183
127.1572859080	42.3227180615	452.9457605839
127.1562914584	42.3227272132	460.3849974402
127.1563038890	42.3227272132	460.2842100130
127.1563163196	42.3227272132	460.1834225857
127.1563287503	42.3227272132	460.0826351585
127.1563411809	42.3227272132	459.9818477312
127.1563536115	42.3227272132	459.8810603039
127.1563660421	42.3227272132	459.7802728768
127.1563784727	42.3227272132	459.6794854495
127.1563909034	42.3227272132	459.5786980222
127.1564033340	42.3227272132	459.4779105949
127.1564157646	42.3227272132	459.3771231677
127.1564281952	42.3227272132	459.2763357405
127.1564406258	42.3227272132	459.1755483132
127.1564530565	42.3227272132	459.0751783539
127.1564654871	42.3227272132	458.9754968864
127.1564779177	42.3227272132	458.8758154187
127.1564903483	42.3227272132	458.7761339511
127.1565027789	42.3227272132	458.6764524834
127.1565152096	42.3227272132	458.5767710157
127.1565276402	42.3227272132	458.4770895482
127.1565400708	42.3227272132	458.3774091486
127.1565525014	42.3227272132	458.2777299404
127.1565649320	42.3227272132	458.1780507324
127.1565773627	42.3227272132	458.0783715242
127.1565897933	42.3227272132	457.9786923161
127.1566022239	42.3227272132	457.8790131079
127.1566146545	42.3227272132	457.7793338998
127.1566270851	42.3227272132	457.6796534649
127.1566395158	42.3227272132	457.5799720964
127.1566519464	42.3227272132	457.4802907280
127.1566643770	42.3227272132	457.3806093597
127.1566768076	42.3227272132	457.2809279913
127.1566892382	42.3227272132	457.1812466228
127.1567016689	42.3227272132	457.0815652544
127.1567140995	42.3227272132	456.9818823876
127.1567265301	42.3227272132	456.8821987598
127.1567389607	42.3227272132	456.7825151319
127.1567513913	42.3227272132	456.6828315039
127.1567638220	42.3227272132	456.5831478761
127.1567762526	42.3227272132	456.4834642482
127.1567886832	42.3227272132	456.3837806203
127.1568011138	42.3227272132	456.2840986306
127.1568135444	42.3227272132	456.1844171629
127.1568259751	42.3227272132	456.0847356954
127.1568384057	42.3227272132	455.9850542277
127.1568508363	42.3227272132	455.8853727601
127.1568632669	42.3227272132	455.7856912925
127.1568756975	42.3227272132	455.6860098248
127.1568881282	42.3227272132	455.5863302858
127.1569005588	42.3227272132	455.4866510777
127.1569129894	42.3227272132	455.3869718695
127.1569254200	42.3227272132	455.2872926615
127.1569378506	42.3227272132	455.1876134533
127.1569502813	42.3227272132	455.0879342452
127.1569627119	42.3227272132	454.9882550371
127.1569751425	42.3227272132	454.8885758290
127.1569875731	42.3227272132	454.7888966208
127.1570000037	42.3227272132	454.6892174127
127.1570124344	42.3227272132	454.5895382045
127.1570248650	42.3227272132	454.4898589965
127.1570372956	42.3227272132	454.3901797883
127.1570497262	42.3227272132	454.2905005801
127.1570621568	42.3227272132	454.1908213721
127.1570745875	42.3227272132	454.0911421639
127.1570870181	42.3227272132	453.9914629558
127.1570994487	42.3227272132	453.8917837476
127.1571118793	42.3227272132	453.7921045395
127.1571243099	42.3227272132	453.6924253314
127.1571367406	42.3227272132	453.5965591184
127.1571491712	42.3227272132	453.5242649615
127.1571616018	42.3227272132	453.4519708047
127.1571740324	42.3227272132	453.3796766479
127.1571864630	42.3227272132	453.3073824910
127.1571988937	42.3227272132	453.2350883341
127.1572113243	42.3227272132	453.1627941773
127.1572237549	42.3227272132	453.0905005503
127.1572361855	42.3227272132	453.0182086529
127.1572486161	42.3227272132	452.9459167556
127.1572610468	42.3227272132	452.8736248583
127.1572734774	42.3227272132	452.8013329609
127.1572859080	42.3227272132	452.7290410636
127.1562914584	42.3227363650	460.1417721135
127.1563038890	42.3227363650	460.0412264426
127.1563163196	42.3227363650	459.9406807717
127.1563287503	42.3227363650	459.8401351009
127.1563411809	42.3227363650	459.7395894299
127.1563536115	42.3227363650	459.6390437590
127.1563660421	42.3227363650	459.5384980882
127.1563784727	42.3227363650	459.4379524173
127.1563909034	42.3227363650	459.3374067463
127.1564033340	42.3227363650	459.2368610754
127.1564157646	42.3227363650	459.1363154045
127.1564281952	42.3227363650	459.0357697337
127.1564406258	42.3227363650	458.9352240627
127.1564530565	42.3227363650	458.8350044258
127.1564654871	42.3227363650	458.7353224870
127.1564779177	42.3227363650	458.6356405481
127.1564903483	42.3227363650	458.5359586092
127.1565027789	42.3227363650	458.4362766703
127.1565152096	42.3227363650	458.3365947313
127.1565276402	42.3227363650	458.2369127925
127.1565400708	42.3227363650	458.1372321444
127.1565525014	42.3227363650	458.0375529363
127.1565649320	42.3227363650	457.9378737282
127.1565773627	42.3227363650	457.8381945201
127.1565897933	42.3227363650	457.7385153119
127.1566022239	42.3227363650	457.6388361038
127.1566146545	42.3227363650	457.5391568956
127.1566270851	42.3227363650	457.4394767283
127.1566395158	42.3227363650	457.3397958312
127.1566519464	42.3227363650	457.2401149340
127.1566643770	42.3227363650	457.1404340370
127.1566768076	42.3227363650	457.0407531398
127.1566892382	42.3227363650	456.9410722426
127.1567016689	42.3227363650	456.8413913455
127.1567140995	42.3227363650	456.7417086374
127.1567265301	42.3227363650	456.6420250096
127.1567389607	42.3227363650	456.5423413817
127.1567513913	42.3227363650	456.4426577537
127.1567638220	42.3227363650	456.3429741259
127.1567762526	42.3227363650	456.2432904980
127.1567886832	42.3227363650	456.1436068701
127.1568011138	42.3227363650	456.0439245230
127.1568135444	42.3227363650	455.9442425841
127.1568259751	42.3227363650	455.8445606453
127.1568384057	42.3227363650	455.7448787063
127.1568508363	42.3227363650	455.6451967674
127.1568632669	42.3227363650	455.5455148286
127.1568756975	42.3227363650	455.4458328897
127.1568881282	42.3227363650	455.3461532817
127.1569005588	42.3227363650	455.2464740735
127.1569129894	42.3227363650	455.1467948654
127.1569254200	42.3227363650	455.0471156573
127.1569378506	42.3227363650	454.9474364492
127.1569502813	42.3227363650	454.8477572410
127.1569627119	42.3227363650	454.7480780330
127.1569751425	42.3227363650	454.6483988248
127.1569875731	42.3227363650	454.5487196167
127.1570000037	42.3227363650	454.4490404085
127.1570124344	42.3227363650	454.3493612003
127.1570248650	42.3227363650	454.2496819923
127.1570372956	42.3227363650	454.1500027841
127.1570497262	42.3227363650	454.0503235760
127.1570621568	42.3227363650	453.9506443679
127.1570745875	42.3227363650	453.8509651598
127.1570870181	42.3227363650	453.7512859516
127.1570994487	42.3227363650	453.6516067435
127.1571118793	42.3227363650	453.5519275353
127.1571243099	42.3227363650	453.4522483273
127.1571367406	42.3227363650	453.3566511419
127.1571491712	42.3227363650	453.2862891509
127.1571616018	42.3227363650	453.2159271599
127.1571740324	42.3227363650	453.1455651688
127.1571864630	42.3227363650	453.0752031777
127.1571988937	42.3227363650	453.0048411866
127.1572113243	42.3227363650	452.9344791955
127.1572237549	42.3227363650	452.8641178448
127.1572361855	42.3227363650	452.7937585844
127.1572486161	42.3227363650	452.7233993241
127.1572610468	42.3227363650	452.6530400639
127.1572734774	42.3227363650	452.5826808036
127.1572859080	42.3227363650	452.5123215433
127.1562914584	42.3227455167	459.8985467866
127.1563038890	42.3227455167	459.7982428721
127.1563163196	42.3227455167	459.6979389575
127.1563287503	42.3227455167	459.5976350430
127.1563411809	42.3227455167	459.4973311285
127.1563536115	42.3227455167	459.3970272139
127.1563660421	42.3227455167	459.2967232994
127.1563784727	42.3227455167	459.1964193848
127.1563909034	42.3227455167	459.0961154703
127.1564033340	42.3227455167	458.9958115557
127.1564157646	42.3227455167	458.8955076411
127.1564281952	42.3227455167	458.7952037266
127.1564406258	42.3227455167	458.6948998121
127.1564530565	42.3227455167	458.5948304976
127.1564654871	42.3227455167	458.4951480875
127.1564779177	42.3227455167	458.3954656773
127.1564903483	42.3227455167	458.2957832671
127.1565027789	42.3227455167	458.1961008569
127.1565152096	42.3227455167	458.0964184468
127.1565276402	42.3227455167	457.9967360367
127.1565400708	42.3227455167	457.8970551401
127.1565525014	42.3227455167	457.7973759319
127.1565649320	42.3227455167	457.6976967239
127.1565773627	42.3227455167	457.5980175157
127.1565897933	42.3227455167	457.4983383076
127.1566022239	42.3227455167	457.3986590994
127.1566146545	42.3227455167	457.2989798913
127.1566270851	42.3227455167	457.1992999916
127.1566395158	42.3227455167	457.0996195657
127.1566519464	42.3227455167	456.9999391398
127.1566643770	42.3227455167	456.9002587140
127.1566768076	42.3227455167	456.8005782881
127.1566892382	42.3227455167	456.7008978622
127.1567016689	42.3227455167	456.6012174363
127.1567140995	42.3227455167	456.5015348870
127.1567265301	42.3227455167	456.4018512592
127.1567389607	42.3227455167	456.3021676313
127.1567513913	42.3227455167	456.2024840033
127.1567638220	42.3227455167	456.1028003755
127.1567762526	42.3227455167	456.0031167476
127.1567886832	42.3227455167	455.9034331197
127.1568011138	42.3227455167	455.8037504152
127.1568135444	42.3227455167	455.7040680050
127.1568259751	42.3227455167	455.6043855950
127.1568384057	42.3227455167	455.5047031848
127.1568508363	42.3227455167	455.4050207746
127.1568632669	42.3227455167	455.3053383645
127.1568756975	42.3227455167	455.2056559544
127.1568881282	42.3227455167	455.1059762773
127.1569005588	42.3227455167	455.0062970692
127.1569129894	42.3227455167	454.9066178610
127.1569254200	42.3227455167	454.8069386530
127.1569378506	42.3227455167	454.7072594448
127.1569502813	42.3227455167	454.6075802367
127.1569627119	42.3227455167	454.5079010286
127.1569751425	42.3227455167	454.4082218205
127.1569875731	42.3227455167	454.3085426123
127.1570000037	42.3227455167	454.2088634042
127.1570124344	42.3227455167	454.1091841960
127.1570248650	42.3227455167	454.0095049880
127.1570372956	42.3227455167	453.9098257798
127.1570497262	42.3227455167	453.8101465717
127.1570621568	42.3227455167	453.7104673636
127.1570745875	42.3227455167	453.6107881555
127.1570870181	42.3227455167	453.5111089473
127.1570994487	42.3227455167	453.4114297391
127.1571118793	42.3227455167	453.3117505310
127.1571243099	42.3227455167	453.2120713229
127.1571367406	42.3227455167	453.1167431654
127.1571491712	42.3227455167	453.0483133400
127.1571616018	42.3227455167	452.9798835148
127.1571740324	42.3227455167	452.9114536895
127.1571864630	42.3227455167	452.8430238642
127.1571988937	42.3227455167	452.7745940389
127.1572113243	42.3227455167	452.7061642136
127.1572237549	42.3227455167	452.6377351391
127.1572361855	42.3227455167	452.5693085158
127.1572486161	42.3227455167	452.5008818925
127.1572610468	42.3227455167	452.4324552693
127.1572734774	42.3227455167	452.3640286461
127.1572859080	42.3227455167	452.2956020228
127.1562914584	42.3227546684	459.6553214599
127.1563038890	42.3227546684	459.5552593017
127.1563163196	42.3227546684	459.4551971435
127.1563287503	42.3227546684	459.3551349854
127.1563411809	42.3227546684	459.2550728272
127.1563536115	42.3227546684	459.1550106689
127.1563660421	42.3227546684	459.0549485108
127.1563784727	42.3227546684	458.9548863526
127.1563909034	42.3227546684	458.8548241944
127.1564033340	42.3227546684	458.7547620362
127.1564157646	42.3227546684	458.6546998779
127.1564281952	42.3227546684	458.5546377198
127.1564406258	42.3227546684	458.4545755616
127.1564530565	42.3227546684	458.3546565695
127.1564654871	42.3227546684	458.2549736881
127.1564779177	42.3227546684	458.1552908067
127.1564903483	42.3227546684	458.0556079253
127.1565027789	42.3227546684	457.9559250438
127.1565152096	42.3227546684	457.8562421624
127.1565276402	42.3227546684	457.7565592810
127.1565400708	42.3227546684	457.6568781359
127.1565525014	42.3227546684	457.5571989278
127.1565649320	42.3227546684	457.4575197197
127.1565773627	42.3227546684	457.3578405116
127.1565897933	42.3227546684	457.2581613034
127.1566022239	42.3227546684	457.1584820953
127.1566146545	42.3227546684	457.0588028871
127.1566270851	42.3227546684	456.9591232551
127.1566395158	42.3227546684	456.8594433005
127.1566519464	42.3227546684	456.7597633458
127.1566643770	42.3227546684	456.6600833913
127.1566768076	42.3227546684	456.5604034366
127.1566892382	42.3227546684	456.4607234820
127.1567016689	42.3227546684	456.3610435274
127.1567140995	42.3227546684	456.2613611368
127.1567265301	42.3227546684	456.1616775090
127.1567389607	42.3227546684	456.0619938811
127.1567513913	42.3227546684	455.9623102531
127.1567638220	42.3227546684	455.8626266253
127.1567762526	42.3227546684	455.7629429974
127.1567886832	42.3227546684	455.6632593695
127.1568011138	42.3227546684	455.5635763076
127.1568135444	42.3227546684	455.4638934262
127.1568259751	42.3227546684	455.3642105449
127.1568384057	42.3227546684	455.2645276634
127.1568508363	42.3227546684	455.1648447820
127.1568632669	42.3227546684	455.0651619007
127.1568756975	42.3227546684	454.9654790192
127.1568881282	42.3227546684	454.8657992732
127.1569005588	42.3227546684	454.7661200650
127.1569129894	42.3227546684	454.6664408569
127.1569254200	42.3227546684	454.5667616488
127.1569378506	42.3227546684	454.4670824407
127.1569502813	42.3227546684	454.3674032325
127.1569627119	42.3227546684	454.2677240245
127.1569751425	42.3227546684	454.1680448163
127.1569875731	42.3227546684	454.0683656082
127.1570000037	42.3227546684	453.9686864000
127.1570124344	42.3227546684	453.8690071919
127.1570248650	42.3227546684	453.7693279838
127.1570372956	42.3227546684	453.6696487757
127.1570497262	42.3227546684	453.5699695675
127.1570621568	42.3227546684	453.4702903595
127.1570745875	42.3227546684	453.3706111513
127.1570870181	42.3227546684	453.2709319431
127.1570994487	42.3227546684	453.1712527350
127.1571118793	42.3227546684	453.0715735268
127.1571243099	42.3227546684	452.9718943188
127.1571367406	42.3227546684	452.8768351889
127.1571491712	42.3227546684	452.8103375294
127.1571616018	42.3227546684	452.7438398700
127.1571740324	42.3227546684	452.6773422104
127.1571864630	42.3227546684	452.6108445509
127.1571988937	42.3227546684	452.5443468914
127.1572113243	42.3227546684	452.4778492318
127.1572237549	42.3227546684	452.4113524336
127.1572361855	42.3227546684	452.3448584474
127.1572486161	42.3227546684	452.2783644611
127.1572610468	42.3227546684	452.2118704749
127.1572734774	42.3227546684	452.1453764887
127.1572859080	42.3227546684	452.0788825025
127.1562914584	42.3227638201	459.4120961333
127.1563038890	42.3227638201	459.3122757314
127.1563163196	42.3227638201	459.2124553295
127.1563287503	42.3227638201	459.1126349277
127.1563411809	42.3227638201	459.0128145259
127.1563536115	42.3227638201	458.9129941240
127.1563660421	42.3227638201	458.8131737222
127.1563784727	42.3227638201	458.7133533204
127.1563909034	42.3227638201	458.6135329185
127.1564033340	42.3227638201	458.5137125166
127.1564157646	42.3227638201	458.4138921147
127.1564281952	42.3227638201	458.3140717130
127.1564406258	42.3227638201	458.2142513111
127.1564530565	42.3227638201	458.1144826414
127.1564654871	42.3227638201	458.0147992888
127.1564779177	42.3227638201	457.9151159361
127.1564903483	42.3227638201	457.8154325834
127.1565027789	42.3227638201	457.7157492307
127.1565152096	42.3227638201	457.6160658780
127.1565276402	42.3227638201	457.5163825254
127.1565400708	42.3227638201	457.4167011318
127.1565525014	42.3227638201	457.3170219236
127.1565649320	42.3227638201	457.2173427156
127.1565773627	42.3227638201	457.1176635074
127.1565897933	42.3227638201	457.0179842993
127.1566022239	42.3227638201	456.9183050911
127.1566146545	42.3227638201	456.8186258830
127.1566270851	42.3227638201	456.7189465186
127.1566395158	42.3227638201	456.6192670352
127.1566519464	42.3227638201	456.5195875518
127.1566643770	42.3227638201	456.4199080686
127.1566768076	42.3227638201	456.3202285852
127.1566892382	42.3227638201	456.2205491018
127.1567016689	42.3227638201	456.1208696184
127.1567140995	42.3227638201	456.0211873866
127.1567265301	42.3227638201	455.9215037588
127.1567389607	42.3227638201	455.8218201309
127.1567513913	42.3227638201	455.7221365029
127.1567638220	42.3227638201	455.6224528751
127.1567762526	42.3227638201	455.5227692472
127.1567886832	42.3227638201	455.4230856193
127.1568011138	42.3227638201	455.3234022000
127.1568135444	42.3227638201	455.2237188473
127.1568259751	42.3227638201	455.1240354948
127.1568384057	42.3227638201	455.0243521421
127.1568508363	42.3227638201	454.9246687894
127.1568632669	42.3227638201	454.8249854368
127.1568756975	42.3227638201	454.7253020841
127.1568881282	42.3227638201	454.6256222690
127.1569005588	42.3227638201	454.5259430609
127.1569129894	42.3227638201	454.4262638527
127.1569254200	42.3227638201	454.3265846447
127.1569378506	42.3227638201	454.2269054365
127.1569502813	42.3227638201	454.1272262284
127.1569627119	42.3227638201	454.0275470203
127.1569751425	42.3227638201	453.9278678122
127.1569875731	42.3227638201	453.8281886040
127.1570000037	42.3227638201	453.7285093959
127.1570124344	42.3227638201	453.6288301877
127.1570248650	42.3227638201	453.5291509797
127.1570372956	42.3227638201	453.4294717715
127.1570497262	42.3227638201	453.3297925633
127.1570621568	42.3227638201	453.2301133553
127.1570745875	42.3227638201	453.1304341471
127.1570870181	42.3227638201	453.0307549390
127.1570994487	42.3227638201	452.9310757308
127.1571118793	42.3227638201	452.8313965227
127.1571243099	42.3227638201	452.7317173146
127.1571367406	42.3227638201	452.6369272125
127.1571491712	42.3227638201	452.5723617188
127.1571616018	42.3227638201	452.5077962251
127.1571740324	42.3227638201	452.4432307313
127.1571864630	42.3227638201	452.3786652376
127.1571988937	42.3227638201	452.3140997438
127.1572113243	42.3227638201	452.2495342501
127.1572237549	42.3227638201	452.1849697281
127.1572361855	42.3227638201	452.1204083789
127.1572486161	42.3227638201	452.0558470297
127.1572610468	42.3227638201	451.9912856806
127.1572734774	42.3227638201	451.9267243313
127.1572859080	42.3227638201	451.8621629821
127.1562914584	42.3227729719	459.1701399284
127.1563038890	42.3227729719	459.0704605242
127.1563163196	42.3227729719	458.9707811201
127.1563287503	42.3227729719	458.8711017160
127.1563411809	42.3227729719	458.7714223118
127.1563536115	42.3227729719	458.6717429076
127.1563660421	42.3227729719	458.5720635589
127.1563784727	42.3227729719	458.4723843507
127.1563909034	42.3227729719	458.3727051426
127.1564033340	42.3227729719	458.2730259344
127.1564157646	42.3227729719	458.1733467262
127.1564281952	42.3227729719	458.0736675182
127.1564406258	42.3227729719	457.9739883100
127.1564530565	42.3227729719	457.8743075075
127.1564654871	42.3227729719	457.7746240758
127.1564779177	42.3227729719	457.6749406438
127.1564903483	42.3227729719	457.5752572119
127.1565027789	42.3227729719	457.4755737800
127.1565152096	42.3227729719	457.3758903481
127.1565276402	42.3227729719	457.2762069163
127.1565400708	42.3227729719	457.1765253883
127.1565525014	42.3227729719	457.0768459841
127.1565649320	42.3227729719	456.9771665801
127.1565773627	42.3227729719	456.8774871759
127.1565897933	42.3227729719	456.7778077717
127.1566022239	42.3227729719	456.6781283675
127.1566146545	42.3227729719	456.5784489633
127.1566270851	42.3227729719	456.4787696706
127.1566395158	42.3227729719	456.3790904624
127.1566519464	42.3227729719	456.2794112543
127.1566643770	42.3227729719	456.1797320462
127.1566768076	42.3227729719	456.0800528381
127.1566892382	42.3227729719	455.9803736299
127.1567016689	42.3227729719	455.8806944217
127.1567140995	42.3227729719	455.7810122827
127.1567265301	42.3227729719	455.6813286549
127.1567389607	42.3227729719	455.5816450269
127.1567513913	42.3227729719	455.4819613990
127.1567638220	42.3227729719	455.3822777712
127.1567762526	42.3227729719	455.2825941433
127.1567886832	42.3227729719	455.1829105153
127.1568011138	42.3227729719	455.0838365379
127.1568135444	42.3227729719	454.9849568230
127.1568259751	42.3227729719	454.8860771081
127.1568384057	42.3227729719	454.7871973932
127.1568508363	42.3227729719	454.6883176783
127.1568632669	42.3227729719	454.5894379634
127.1568756975	42.3227729719	454.4905582485
127.1568881282	42.3227729719	454.3916823062
127.1569005588	42.3227729719	454.2928070110
127.1569129894	42.3227729719	454.1939317159
127.1569254200	42.3227729719	454.0950564208
127.1569378506	42.3227729719	453.9961811256
127.1569502813	42.3227729719	453.8973058305
127.1569627119	42.3227729719	453.7984305354
127.1569751425	42.3227729719	453.6995550543
127.1569875731	42.3227729719	453.6006795631
127.1570000037	42.3227729719	453.5018040719
127.1570124344	42.3227729719	453.4029285807
127.1570248650	42.3227729719	453.3040530896
127.1570372956	42.3227729719	453.2051775985
127.1570497262	42.3227729719	453.1063021073
127.1570621568	42.3227729719	453.0074266162
127.1570745875	42.3227729719	452.9085511250
127.1570870181	42.3227729719	452.8096756338
127.1570994487	42.3227729719	452.7108001426
127.1571118793	42.3227729719	452.6119246514
127.1571243099	42.3227729719	452.5130491604
127.1571367406	42.3227729719	452.4191080170
127.1571491712	42.3227729719	452.3556711681
127.1571616018	42.3227729719	452.2922343193
127.1571740324	42.3227729719	452.2287974703
127.1571864630	42.3227729719	452.1653606214
127.1571988937	42.3227729719	452.1019237725
127.1572113243	42.3227729719	452.0384869236
127.1572237549	42.3227729719	451.9750510650
127.1572361855	42.3227729719	451.9116184399
127.1572486161	42.3227729719	451.8481858147
127.1572610468	42.3227729719	451.7847531896
127.1572734774	42.3227729719	451.7213205644
127.1572859080	42.3227729719	451.6578879392
127.1562914584	42.3227821236	458.9299656188
127.1563038890	42.3227821236	458.8302857434
127.1563163196	42.3227821236	458.7306058679
127.1563287503	42.3227821236	458.6309259926
127.1563411809	42.3227821236	458.5312461171
127.1563536115	42.3227821236	458.4315662417
127.1563660421	42.3227821236	458.3318865547
127.1563784727	42.3227821236	458.2322073466
127.1563909034	42.3227821236	458.1325281384
127.1564033340	42.3227821236	458.0328489302
127.1564157646	42.3227821236	457.9331697221
127.1564281952	42.3227821236	457.8334905140
127.1564406258	42.3227821236	457.7338113059
127.1564530565	42.3227821236	457.6341306813
127.1564654871	42.3227821236	457.5344477207
127.1564779177	42.3227821236	457.4347647601
127.1564903483	42.3227821236	457.3350817995
127.1565027789	42.3227821236	457.2353988388
127.1565152096	42.3227821236	457.1357158782
127.1565276402	42.3227821236	457.0360329176
127.1565400708	42.3227821236	456.9363514153
127.1565525014	42.3227821236	456.8366715399
127.1565649320	42.3227821236	456.7369916646
127.1565773627	42.3227821236	456.6373117891
127.1565897933	42.3227821236	456.5376319137
127.1566022239	42.3227821236	456.4379520382
127.1566146545	42.3227821236	456.3382721628
127.1566270851	42.3227821236	456.2385926664
127.1566395158	42.3227821236	456.1389134583
127.1566519464	42.3227821236	456.0392342501
127.1566643770	42.3227821236	455.9395550421
127.1566768076	42.3227821236	455.8398758339
127.1566892382	42.3227821236	455.7401966258
127.1567016689	42.3227821236	455.6405174176
127.1567140995	42.3227821236	455.5408352785
127.1567265301	42.3227821236	455.4411516507
127.1567389607	42.3227821236	455.3414680228
127.1567513913	42.3227821236	455.2417843949
127.1567638220	42.3227821236	455.1421007670
127.1567762526	42.3227821236	455.0424171391
127.1567886832	42.3227821236	454.9427335112
127.1568011138	42.3227821236	454.8451251564
127.1568135444	42.3227821236	454.7481780785
127.1568259751	42.3227821236	454.6512310007
127.1568384057	42.3227821236	454.5542839228
127.1568508363	42.3227821236	454.4573368449
127.1568632669	42.3227821236	454.3603897672
127.1568756975	42.3227821236	454.2634426893
127.1568881282	42.3227821236	454.1664993840
127.1569005588	42.3227821236	454.0695567258
127.1569129894	42.3227821236	453.9726140677
127.1569254200	42.3227821236	453.8756714097
127.1569378506	42.3227821236	453.7787287516
127.1569502813	42.3227821236	453.6817860935
127.1569627119	42.3227821236	453.5848434354
127.1569751425	42.3227821236	453.4879001442
127.1569875731	42.3227821236	453.3909568188
127.1570000037	42.3227821236	453.2940134934
127.1570124344	42.3227821236	453.1970701680
127.1570248650	42.3227821236	453.1001268427
127.1570372956	42.3227821236	453.0031835172
127.1570497262	42.3227821236	452.9062401918
127.1570621568	42.3227821236	452.8092968665
127.1570745875	42.3227821236	452.7123535411
127.1570870181	42.3227821236	452.6154102157
127.1570994487	42.3227821236	452.5184668903
127.1571118793	42.3227821236	452.4215235649
127.1571243099	42.3227821236	452.3245802396
127.1571367406	42.3227821236	452.2323022999
127.1571491712	42.3227821236	452.1688659222
127.1571616018	42.3227821236	452.1054295446
127.1571740324	42.3227821236	452.0419931670
127.1571864630	42.3227821236	451.9785567893
127.1571988937	42.3227821236	451.9151204117
127.1572113243	42.3227821236	451.8516840340
127.1572237549	42.3227821236	451.7882485362
127.1572361855	42.3227821236	451.7248159110
127.1572486161	42.3227821236	451.6613832859
127.1572610468	42.3227821236	451.5979506608
127.1572734774	42.3227821236	451.5345180356
127.1572859080	42.3227821236	451.4710854104
127.1562914584	42.3227912753	458.6897913092
127.1563038890	42.3227912753	458.5901109625
127.1563163196	42.3227912753	458.4904306158
127.1563287503	42.3227912753	458.3907502692
127.1563411809	42.3227912753	458.2910699225
127.1563536115	42.3227912753	458.1913895758
127.1563660421	42.3227912753	458.0917095506
127.1563784727	42.3227912753	457.9920303424
127.1563909034	42.3227912753	457.8923511342
127.1564033340	42.3227912753	457.7926719261
127.1564157646	42.3227912753	457.6929927179
127.1564281952	42.3227912753	457.5933135099
127.1564406258	42.3227912753	457.4936343017
127.1564530565	42.3227912753	457.3939538550
127.1564654871	42.3227912753	457.2942713657
127.1564779177	42.3227912753	457.1945888764
127.1564903483	42.3227912753	457.0949063870
127.1565027789	42.3227912753	456.9952238976
127.1565152096	42.3227912753	456.8955414082
127.1565276402	42.3227912753	456.7958589189
127.1565400708	42.3227912753	456.6961774424
127.1565525014	42.3227912753	456.5964970957
127.1565649320	42.3227912753	456.4968167491
127.1565773627	42.3227912753	456.3971364024
127.1565897933	42.3227912753	456.2974560557
127.1566022239	42.3227912753	456.1977757090
127.1566146545	42.3227912753	456.0980953623
127.1566270851	42.3227912753	455.9984156623
127.1566395158	42.3227912753	455.8987364541
127.1566519464	42.3227912753	455.7990572460
127.1566643770	42.3227912753	455.6993780379
127.1566768076	42.3227912753	455.5996988298
127.1566892382	42.3227912753	455.5000196216
127.1567016689	42.3227912753	455.4003404134
127.1567140995	42.3227912753	455.3006582744
127.1567265301	42.3227912753	455.2009746466
127.1567389607	42.3227912753	455.1012910186
127.1567513913	42.3227912753	455.0016073907
127.1567638220	42.3227912753	454.9019237629
127.1567762526	42.3227912753	454.8022401350
127.1567886832	42.3227912753	454.7025565070
127.1568011138	42.3227912753	454.6064137750
127.1568135444	42.3227912753	454.5113993341
127.1568259751	42.3227912753	454.4163848934
127.1568384057	42.3227912753	454.3213704525
127.1568508363	42.3227912753	454.2263560116
127.1568632669	42.3227912753	454.1313415709
127.1568756975	42.3227912753	454.0363271300
127.1568881282	42.3227912753	453.9413164618
127.1569005588	42.3227912753	453.8463064407
127.1569129894	42.3227912753	453.7512964196
127.1569254200	42.3227912753	453.6562863986
127.1569378506	42.3227912753	453.5612763775
127.1569502813	42.3227912753	453.4662663564
127.1569627119	42.3227912753	453.3712563354
127.1569751425	42.3227912753	453.2762452341
127.1569875731	42.3227912753	453.1812340745
127.1570000037	42.3227912753	453.0862229148
127.1570124344	42.3227912753	452.9912117552
127.1570248650	42.3227912753	452.8962005957
127.1570372956	42.3227912753	452.8011894360
127.1570497262	42.3227912753	452.7061782764
127.1570621568	42.3227912753	452.6111671169
127.1570745875	42.3227912753	452.5161559572
127.1570870181	42.3227912753	452.4211447976
127.1570994487	42.3227912753	452.3261336379
127.1571118793	42.3227912753	452.2311224783
127.1571243099	42.3227912753	452.1361113188
127.1571367406	42.3227912753	452.0454965827
127.1571491712	42.3227912753	451.9820606763
127.1571616018	42.3227912753	451.9186247700
127.1571740324	42.3227912753	451.8551888636
127.1571864630	42.3227912753	451.7917529572
127.1571988937	42.3227912753	451.7283170508
127.1572113243	42.3227912753	451.6648811444
127.1572237549	42.3227912753	451.6014460074
127.1572361855	42.3227912753	451.5380133822
127.1572486161	42.3227912753	451.4745807571
127.1572610468	42.3227912753	451.4111481320
127.1572734774	42.3227912753	451.3477155068
127.1572859080	42.3227912753	451.2842828816
127.1562914584	42.3228004270	458.4496169994
127.1563038890	42.3228004270	458.3499361815
127.1563163196	42.3228004270	458.2502553635
127.1563287503	42.3228004270	458.1505745456
127.1563411809	42.3228004270	458.0508937277
127.1563536115	42.3228004270	457.9512129097
127.1563660421	42.3228004270	457.8515325462
127.1563784727	42.3228004270	457.7518533381
127.1563909034	42.3228004270	457.6521741299
127.1564033340	42.3228004270	457.5524949218
127.1564157646	42.3228004270	457.4528157136
127.1564281952	42.3228004270	457.3531365056
127.1564406258	42.3228004270	457.2534572974
127.1564530565	42.3228004270	457.1537770286
127.1564654871	42.3228004270	457.0540950105
127.1564779177	42.3228004270	456.9544129924
127.1564903483	42.3228004270	456.8547309743
127.1565027789	42.3228004270	456.7550489562
127.1565152096	42.3228004270	456.6553669381
127.1565276402	42.3228004270	456.5556849200
127.1565400708	42.3228004270	456.4560034692
127.1565525014	42.3228004270	456.3563226513
127.1565649320	42.3228004270	456.2566418334
127.1565773627	42.3228004270	456.1569610154
127.1565897933	42.3228004270	456.0572801975
127.1566022239	42.3228004270	455.9575993795
127.1566146545	42.3228004270	455.8579185615
127.1566270851	42.3228004270	455.7582386579
127.1566395158	42.3228004270	455.6585594498
127.1566519464	42.3228004270	455.5588802416
127.1566643770	42.3228004270	455.4592010336
127.1566768076	42.3228004270	455.3595218254
127.1566892382	42.3228004270	455.2598426173
127.1567016689	42.3228004270	455.1601634091
127.1567140995	42.3228004270	455.0604812700
127.1567265301	42.3228004270	454.9607976422
127.1567389607	42.3228004270	454.8611140143
127.1567513913	42.3228004270	454.7614303864
127.1567638220	42.3228004270	454.6617467585
127.1567762526	42.3228004270	454.5620631306
127.1567886832	42.3228004270	454.4623795027
127.1568011138	42.3228004270	454.3677023933
127.1568135444	42.3228004270	454.2746205895
127.1568259751	42.3228004270	454.1815387858
127.1568384057	42.3228004270	454.0884569820
127.1568508363	42.3228004270	453.9953751781
127.1568632669	42.3228004270	453.9022933744
127.1568756975	42.3228004270	453.8092115706
127.1568881282	42.3228004270	453.7161335394
127.1569005588	42.3228004270	453.6230561553
127.1569129894	42.3228004270	453.5299787713
127.1569254200	42.3228004270	453.4369013873
127.1569378506	42.3228004270	453.3438240033
127.1569502813	42.3228004270	453.2507466192
127.1569627119	42.3228004270	453.1576692353
127.1569751425	42.3228004270	453.0645903238
127.1569875731	42.3228004270	452.9715113300
127.1570000037	42.3228004270	452.8784323361
127.1570124344	42.3228004270	452.7853533423
127.1570248650	42.3228004270	452.6922743485
127.1570372956	42.3228004270	452.5991953547
127.1570497262	42.3228004270	452.5061163608
127.1570621568	42.3228004270	452.4130373670
127.1570745875	42.3228004270	452.3199583732
127.1570870181	42.3228004270	452.2268793793
127.1570994487	42.3228004270	452.1338003855
127.1571118793	42.3228004270	452.0407213916
127.1571243099	42.3228004270	451.9476423978
127.1571367406	42.3228004270	451.8586908654
127.1571491712	42.3228004270	451.7952554303
127.1571616018	42.3228004270	451.7318199952
127.1571740324	42.3228004270	451.6683845601
127.1571864630	42.3228004270	451.6049491250
127.1571988937	42.3228004270	451.5415136898
127.1572113243	42.3228004270	451.4780782547
127.1572237549	42.3228004270	451.4146434784
127.1572361855	42.3228004270	451.3512108533
127.1572486161	42.3228004270	451.2877782281
127.1572610468	42.3228004270	451.2243456030
127.1572734774	42.3228004270	451.1609129778
127.1572859080	42.3228004270	451.0974803527
127.1562914584	42.3228095787	458.2094426898
127.1563038890	42.3228095787	458.1097614006
127.1563163196	42.3228095787	458.0100801114
127.1563287503	42.3228095787	457.9103988222
127.1563411809	42.3228095787	457.8107175330
127.1563536115	42.3228095787	457.7110362438
127.1563660421	42.3228095787	457.6113555421
127.1563784727	42.3228095787	457.5116763339
127.1563909034	42.3228095787	457.4119971258
127.1564033340	42.3228095787	457.3123179176
127.1564157646	42.3228095787	457.2126387094
127.1564281952	42.3228095787	457.1129595014
127.1564406258	42.3228095787	457.0132802932
127.1564530565	42.3228095787	456.9136002023
127.1564654871	42.3228095787	456.8139186555
127.1564779177	42.3228095787	456.7142371087
127.1564903483	42.3228095787	456.6145555618
127.1565027789	42.3228095787	456.5148740150
127.1565152096	42.3228095787	456.4151924681
127.1565276402	42.3228095787	456.3155109213
127.1565400708	42.3228095787	456.2158294963
127.1565525014	42.3228095787	456.1161482070
127.1565649320	42.3228095787	456.0164669179
127.1565773627	42.3228095787	455.9167856287
127.1565897933	42.3228095787	455.8171043395
127.1566022239	42.3228095787	455.7174230502
127.1566146545	42.3228095787	455.6177417610
127.1566270851	42.3228095787	455.5180616538
127.1566395158	42.3228095787	455.4183824456
127.1566519464	42.3228095787	455.3187032375
127.1566643770	42.3228095787	455.2190240294
127.1566768076	42.3228095787	455.1193448213
127.1566892382	42.3228095787	455.0196656131
127.1567016689	42.3228095787	454.9199864050
127.1567140995	42.3228095787	454.8203042659
127.1567265301	42.3228095787	454.7206206381
127.1567389607	42.3228095787	454.6209370101
127.1567513913	42.3228095787	454.5212533822
127.1567638220	42.3228095787	454.4215697544
127.1567762526	42.3228095787	454.3218861265
127.1567886832	42.3228095787	454.2222024985
127.1568011138	42.3228095787	454.1289910119
127.1568135444	42.3228095787	454.0378418451
127.1568259751	42.3228095787	453.9466926784
127.1568384057	42.3228095787	453.8555435116
127.1568508363	42.3228095787	453.7643943448
127.1568632669	42.3228095787	453.6732451781
127.1568756975	42.3228095787	453.5820960113
127.1568881282	42.3228095787	453.4909506172
127.1569005588	42.3228095787	453.3998058701
127.1569129894	42.3228095787	453.3086611231
127.1569254200	42.3228095787	453.2175163762
127.1569378506	42.3228095787	453.1263716292
127.1569502813	42.3228095787	453.0352268822
127.1569627119	42.3228095787	452.9440821353
127.1569751425	42.3228095787	452.8529354138
127.1569875731	42.3228095787	452.7617885857
127.1570000037	42.3228095787	452.6706417576
127.1570124344	42.3228095787	452.5794949295
127.1570248650	42.3228095787	452.4883481015
127.1570372956	42.3228095787	452.3972012734
127.1570497262	42.3228095787	452.3060544453
127.1570621568	42.3228095787	452.2149076174
127.1570745875	42.3228095787	452.1237607893
127.1570870181	42.3228095787	452.0326139612
127.1570994487	42.3228095787	451.9414671331
127.1571118793	42.3228095787	451.8503203050
127.1571243099	42.3228095787	451.7591734771
127.1571367406	42.3228095787	451.6718851483
127.1571491712	42.3228095787	451.6084501844
127.1571616018	42.3228095787	451.5450152206
127.1571740324	42.3228095787	451.4815802567
127.1571864630	42.3228095787	451.4181452929
127.1571988937	42.3228095787	451.3547103290
127.1572113243	42.3228095787	451.2912753651
127.1572237549	42.3228095787	451.2278409496
127.1572361855	42.3228095787	451.1644083244
127.1572486161	42.3228095787	451.1009756993
127.1572610468	42.3228095787	451.0375430742
127.1572734774	42.3228095787	450.9741104490
127.1572859080	42.3228095787	450.9106778238
127.1562914584	42.3228187305	457.9692683802
127.1563038890	42.3228187305	457.8695866197
127.1563163196	42.3228187305	457.7699048592
127.1563287503	42.3228187305	457.6702230989
127.1563411809	42.3228187305	457.5705413384
127.1563536115	42.3228187305	457.4708595779
127.1563660421	42.3228187305	457.3711785379
127.1563784727	42.3228187305	457.2714993298
127.1563909034	42.3228187305	457.1718201216
127.1564033340	42.3228187305	457.0721409134
127.1564157646	42.3228187305	456.9724617053
127.1564281952	42.3228187305	456.8727824972
127.1564406258	42.3228187305	456.7731032891
127.1564530565	42.3228187305	456.6734233760
127.1564654871	42.3228187305	456.5737423005
127.1564779177	42.3228187305	456.4740612249
127.1564903483	42.3228187305	456.3743801493
127.1565027789	42.3228187305	456.2746990737
127.1565152096	42.3228187305	456.1750179981
127.1565276402	42.3228187305	456.0753369226
127.1565400708	42.3228187305	455.9756555233
127.1565525014	42.3228187305	455.8759737628
127.1565649320	42.3228187305	455.7762920024
127.1565773627	42.3228187305	455.6766102419
127.1565897933	42.3228187305	455.5769284815
127.1566022239	42.3228187305	455.4772467210
127.1566146545	42.3228187305	455.3775649605
127.1566270851	42.3228187305	455.2778846496
127.1566395158	42.3228187305	455.1782054415
127.1566519464	42.3228187305	455.0785262333
127.1566643770	42.3228187305	454.9788470253
127.1566768076	42.3228187305	454.8791678171
127.1566892382	42.3228187305	454.7794886090
127.1567016689	42.3228187305	454.6798094008
127.1567140995	42.3228187305	454.5801272617
127.1567265301	42.3228187305	454.4804436339
127.1567389607	42.3228187305	454.3807600060
127.1567513913	42.3228187305	454.2810763781
127.1567638220	42.3228187305	454.1813927502
127.1567762526	42.3228187305	454.0817091223
127.1567886832	42.3228187305	453.9820254944
127.1568011138	42.3228187305	453.8902796304
127.1568135444	42.3228187305	453.8010631007
127.1568259751	42.3228187305	453.7118465710
127.1568384057	42.3228187305	453.6226300413
127.1568508363	42.3228187305	453.5334135115
127.1568632669	42.3228187305	453.4441969819
127.1568756975	42.3228187305	453.3549804521
127.1568881282	42.3228187305	453.2657676950
127.1569005588	42.3228187305	453.1765555850
127.1569129894	42.3228187305	453.0873434750
127.1569254200	42.3228187305	452.9981313651
127.1569378506	42.3228187305	452.9089192551
127.1569502813	42.3228187305	452.8197071452
127.1569627119	42.3228187305	452.7304950353
127.1569751425	42.3228187305	452.6412805037
127.1569875731	42.3228187305	452.5520658413
127.1570000037	42.3228187305	452.4628511790
127.1570124344	42.3228187305	452.3736365167
127.1570248650	42.3228187305	452.2844218545
127.1570372956	42.3228187305	452.1952071922
127.1570497262	42.3228187305	452.1059925299
127.1570621568	42.3228187305	452.0167778677
127.1570745875	42.3228187305	451.9275632054
127.1570870181	42.3228187305	451.8383485431
127.1570994487	42.3228187305	451.7491338808
127.1571118793	42.3228187305	451.6599192185
127.1571243099	42.3228187305	451.5707045563
127.1571367406	42.3228187305	451.4850794311
127.1571491712	42.3228187305	451.4216449385
127.1571616018	42.3228187305	451.3582104460
127.1571740324	42.3228187305	451.2947759534
127.1571864630	42.3228187305	451.2313414607
127.1571988937	42.3228187305	451.1679069681
127.1572113243	42.3228187305	451.1044724755
127.1572237549	42.3228187305	451.0410384208
127.1572361855	42.3228187305	450.9776057956
127.1572486161	42.3228187305	450.9141731705
127.1572610468	42.3228187305	450.8507405454
127.1572734774	42.3228187305	450.7873079202
127.1572859080	42.3228187305	450.7238752950
127.1562914584	42.3228278822	457.7290940704
127.1563038890	42.3228278822	457.6294118387
127.1563163196	42.3228278822	457.5297296069
127.1563287503	42.3228278822	457.4300473753
127.1563411809	42.3228278822	457.3303651435
127.1563536115	42.3228278822	457.2306829118
127.1563660421	42.3228278822	457.1310015336
127.1563784727	42.3228278822	457.0313223254
127.1563909034	42.3228278822	456.9316431173
127.1564033340	42.3228278822	456.8319639091
127.1564157646	42.3228278822	456.7322847010
127.1564281952	42.3228278822	456.6326054929
127.1564406258	42.3228278822	456.5329262848
127.1564530565	42.3228278822	456.4332465496
127.1564654871	42.3228278822	456.3335659453
127.1564779177	42.3228278822	456.2338853410
127.1564903483	42.3228278822	456.1342047367
127.1565027789	42.3228278822	456.0345241323
127.1565152096	42.3228278822	455.9348435280
127.1565276402	42.3228278822	455.8351629237
127.1565400708	42.3228278822	455.7354815501
127.1565525014	42.3228278822	455.6357993184
127.1565649320	42.3228278822	455.5361170868
127.1565773627	42.3228278822	455.4364348550
127.1565897933	42.3228278822	455.3367526233
127.1566022239	42.3228278822	455.2370703915
127.1566146545	42.3228278822	455.1373881598
127.1566270851	42.3228278822	455.0377076453
127.1566395158	42.3228278822	454.9380284371
127.1566519464	42.3228278822	454.8383492290
127.1566643770	42.3228278822	454.7386700209
127.1566768076	42.3228278822	454.6389908128
127.1566892382	42.3228278822	454.5393116046
127.1567016689	42.3228278822	454.4396323965
127.1567140995	42.3228278822	454.3399502574
127.1567265301	42.3228278822	454.2402666296
127.1567389607	42.3228278822	454.1405830017
127.1567513913	42.3228278822	454.0408993737
127.1567638220	42.3228278822	453.9412157459
127.1567762526	42.3228278822	453.8415321180
127.1567886832	42.3228278822	453.7418484900
127.1568011138	42.3228278822	453.6515682488
127.1568135444	42.3228278822	453.5642843561
127.1568259751	42.3228278822	453.4770004635
127.1568384057	42.3228278822	453.3897165707
127.1568508363	42.3228278822	453.3024326780
127.1568632669	42.3228278822	453.2151487854
127.1568756975	42.3228278822	453.1278648927
127.1568881282	42.3228278822	453.0405847726
127.1569005588	42.3228278822	452.9533052996
127.1569129894	42.3228278822	452.8660258267
127.1569254200	42.3228278822	452.7787463538
127.1569378506	42.3228278822	452.6914668809
127.1569502813	42.3228278822	452.6041874080
127.1569627119	42.3228278822	452.5169079351
127.1569751425	42.3228278822	452.4296255934
127.1569875731	42.3228278822	452.3423430969
127.1570000037	42.3228278822	452.2550606003
127.1570124344	42.3228278822	452.1677781038
127.1570248650	42.3228278822	452.0804956074
127.1570372956	42.3228278822	451.9932131108
127.1570497262	42.3228278822	451.9059306143
127.1570621568	42.3228278822	451.8186481179
127.1570745875	42.3228278822	451.7313656213
127.1570870181	42.3228278822	451.6440831248
127.1570994487	42.3228278822	451.5568006283
127.1571118793	42.3228278822	451.4695181318
127.1571243099	42.3228278822	451.3822356353
127.1571367406	42.3228278822	451.2982737139
127.1571491712	42.3228278822	451.2348396925
127.1571616018	42.3228278822	451.1714056712
127.1571740324	42.3228278822	451.1079716499
127.1571864630	42.3228278822	451.0445376285
127.1571988937	42.3228278822	450.9811036071
127.1572113243	42.3228278822	450.9176695858
127.1572237549	42.3228278822	450.8542358918
127.1572361855	42.3228278822	450.7908032667
127.1572486161	42.3228278822	450.7273706415
127.1572610468	42.3228278822	450.6639380164
127.1572734774	42.3228278822	450.6005053912
127.1572859080	42.3228278822	450.5370727661
127.1562914584	42.3228370339	457.4889197608
127.1563038890	42.3228370339	457.3892370578
127.1563163196	42.3228370339	457.2895543548
127.1563287503	42.3228370339	457.1898716519
127.1563411809	42.3228370339	457.0901889489
127.1563536115	42.3228370339	456.9905062459
127.1563660421	42.3228370339	456.8908245294
127.1563784727	42.3228370339	456.7911453213
127.1563909034	42.3228370339	456.6914661131
127.1564033340	42.3228370339	456.5917869050
127.1564157646	42.3228370339	456.4921076968
127.1564281952	42.3228370339	456.3924284888
127.1564406258	42.3228370339	456.2927492806
127.1564530565	42.3228370339	456.1930697233
127.1564654871	42.3228370339	456.0933895903
127.1564779177	42.3228370339	455.9937094573
127.1564903483	42.3228370339	455.8940293242
127.1565027789	42.3228370339	455.7943491911
127.1565152096	42.3228370339	455.6946690580
127.1565276402	42.3228370339	455.5949889250
127.1565400708	42.3228370339	455.4953075772
127.1565525014	42.3228370339	455.3956248742
127.1565649320	42.3228370339	455.2959421713
127.1565773627	42.3228370339	455.1962594683
127.1565897933	42.3228370339	455.0965767653
127.1566022239	42.3228370339	454.9968940623
127.1566146545	42.3228370339	454.8972113593
127.1566270851	42.3228370339	454.7975306411
127.1566395158	42.3228370339	454.6978514330
127.1566519464	42.3228370339	454.5981722248
127.1566643770	42.3228370339	454.4984930168
127.1566768076	42.3228370339	454.3988138086
127.1566892382	42.3228370339	454.2991346005
127.1567016689	42.3228370339	454.1994553923
127.1567140995	42.3228370339	454.0997732532
127.1567265301	42.3228370339	454.0000896254
127.1567389607	42.3228370339	453.9004059975
127.1567513913	42.3228370339	453.8007223696
127.1567638220	42.3228370339	453.7010387417
127.1567762526	42.3228370339	453.6013551138
127.1567886832	42.3228370339	453.5016714859
127.1568011138	42.3228370339	453.4128568673
127.1568135444	42.3228370339	453.3275056117
127.1568259751	42.3228370339	453.2421543561
127.1568384057	42.3228370339	453.1568031004
127.1568508363	42.3228370339	453.0714518447
127.1568632669	42.3228370339	452.9861005891
127.1568756975	42.3228370339	452.9007493334
127.1568881282	42.3228370339	452.8154018504
127.1569005588	42.3228370339	452.7300550144
127.1569129894	42.3228370339	452.6447081785
127.1569254200	42.3228370339	452.5593613427
127.1569378506	42.3228370339	452.4740145068
127.1569502813	42.3228370339	452.3886676709
127.1569627119	42.3228370339	452.3033208351
127.1569751425	42.3228370339	452.2179706833
127.1569875731	42.3228370339	452.1326203525
127.1570000037	42.3228370339	452.0472700218
127.1570124344	42.3228370339	451.9619196910
127.1570248650	42.3228370339	451.8765693604
127.1570372956	42.3228370339	451.7912190296
127.1570497262	42.3228370339	451.7058686989
127.1570621568	42.3228370339	451.6205183682
127.1570745875	42.3228370339	451.5351680375
127.1570870181	42.3228370339	451.4498177067
127.1570994487	42.3228370339	451.3644673759
127.1571118793	42.3228370339	451.2791170452
127.1571243099	42.3228370339	451.1937667145
127.1571367406	42.3228370339	451.1114679967
127.1571491712	42.3228370339	451.0480344466
127.1571616018	42.3228370339	450.9846008966
127.1571740324	42.3228370339	450.9211673465
127.1571864630	42.3228370339	450.8577337964
127.1571988937	42.3228370339	450.7943002463
127.1572113243	42.3228370339	450.7308666962
127.1572237549	42.3228370339	450.6674333630
127.1572361855	42.3228370339	450.6040007379
127.1572486161	42.3228370339	450.5405681127
127.1572610468	42.3228370339	450.4771354876
127.1572734774	42.3228370339	450.4137028624
127.1572859080	42.3228370339	450.3502702372
127.1562914584	42.3228461856	457.2487454512
127.1563038890	42.3228461856	457.1490622769
127.1563163196	42.3228461856	457.0493791027
127.1563287503	42.3228461856	456.9496959285
127.1563411809	42.3228461856	456.8500127543
127.1563536115	42.3228461856	456.7503295800
127.1563660421	42.3228461856	456.6506475253
127.1563784727	42.3228461856	456.5509683171
127.1563909034	42.3228461856	456.4512891090
127.1564033340	42.3228461856	456.3516099008
127.1564157646	42.3228461856	456.2519306926
127.1564281952	42.3228461856	456.1522514846
127.1564406258	42.3228461856	456.0525722764
127.1564530565	42.3228461856	455.9528928970
127.1564654871	42.3228461856	455.8532132353
127.1564779177	42.3228461856	455.7535335735
127.1564903483	42.3228461856	455.6538539117
127.1565027789	42.3228461856	455.5541742499
127.1565152096	42.3228461856	455.4544945880
127.1565276402	42.3228461856	455.3548149263
127.1565400708	42.3228461856	455.2551336042
127.1565525014	42.3228461856	455.1554504299
127.1565649320	42.3228461856	455.0557672558
127.1565773627	42.3228461856	454.9560840815
127.1565897933	42.3228461856	454.8564009073
127.1566022239	42.3228461856	454.7567177330
127.1566146545	42.3228461856	454.6570345587
127.1566270851	42.3228461856	454.5573536370
127.1566395158	42.3228461856	454.4576744288
127.1566519464	42.3228461856	454.3579952207
127.1566643770	42.3228461856	454.2583160126
127.1566768076	42.3228461856	454.1586368045
127.1566892382	42.3228461856	454.0589575963
127.1567016689	42.3228461856	453.9592783882
127.1567140995	42.3228461856	453.8595962491
127.1567265301	42.3228461856	453.7599126213
127.1567389607	42.3228461856	453.6602289933
127.1567513913	42.3228461856	453.5605453654
127.1567638220	42.3228461856	453.4608617376
127.1567762526	42.3228461856	453.3611781097
127.1567886832	42.3228461856	453.2614944817
127.1568011138	42.3228461856	453.1741454859
127.1568135444	42.3228461856	453.0907268672
127.1568259751	42.3228461856	453.0073082487
127.1568384057	42.3228461856	452.9238896300
127.1568508363	42.3228461856	452.8404710114
127.1568632669	42.3228461856	452.7570523928
127.1568756975	42.3228461856	452.6736337742
127.1568881282	42.3228461856	452.5902189281
127.1569005588	42.3228461856	452.5068047293
127.1569129894	42.3228461856	452.4233905304
127.1569254200	42.3228461856	452.3399763316
127.1569378506	42.3228461856	452.2565621328
127.1569502813	42.3228461856	452.1731479339
127.1569627119	42.3228461856	452.0897337351
127.1569751425	42.3228461856	452.0063157732
127.1569875731	42.3228461856	451.9228976082
127.1570000037	42.3228461856	451.8394794433
127.1570124344	42.3228461856	451.7560612783
127.1570248650	42.3228461856	451.6726431134
127.1570372956	42.3228461856	451.5892249484
127.1570497262	42.3228461856	451.5058067834
127.1570621568	42.3228461856	451.4223886185
127.1570745875	42.3228461856	451.3389704536
127.1570870181	42.3228461856	451.2555522886
127.1570994487	42.3228461856	451.1721341236
127.1571118793	42.3228461856	451.0887159586
127.1571243099	42.3228461856	451.0052977937
127.1571367406	42.3228461856	450.9246622796
127.1571491712	42.3228461856	450.8612292007
127.1571616018	42.3228461856	450.7977961220
127.1571740324	42.3228461856	450.7343630431
127.1571864630	42.3228461856	450.6709299643
127.1571988937	42.3228461856	450.6074968854
127.1572113243	42.3228461856	450.5440638066
127.1572237549	42.3228461856	450.4806308342
127.1572361855	42.3228461856	450.4171982090
127.1572486161	42.3228461856	450.3537655839
127.1572610468	42.3228461856	450.2903329588
127.1572734774	42.3228461856	450.2269003336
127.1572859080	42.3228461856	450.1634677084
127.1562914584	42.3228553374	457.0085710617
127.1563038890	42.3228553374	456.9088874514
127.1563163196	42.3228553374	456.8092038410
127.1563287503	42.3228553374	456.7095202308
127.1563411809	42.3228553374	456.6098366205
127.1563536115	42.3228553374	456.5101530101
127.1563660421	42.3228553374	456.4104706374
127.1563784727	42.3228553374	456.3107914117
127.1563909034	42.3228553374	456.2111121859
127.1564033340	42.3228553374	456.1114329602
127.1564157646	42.3228553374	456.0117537344
127.1564281952	42.3228553374	455.9120745088
127.1564406258	42.3228553374	455.8123952831
127.1564530565	42.3228553374	455.7127160640
127.1564654871	42.3228553374	455.6130368559
127.1564779177	42.3228553374	455.5133576478
127.1564903483	42.3228553374	455.4136784396
127.1565027789	42.3228553374	455.3139992314
127.1565152096	42.3228553374	455.2143200233
127.1565276402	42.3228553374	455.1146408152
127.1565400708	42.3228553374	455.0149595262
127.1565525014	42.3228553374	454.9152759159
127.1565649320	42.3228553374	454.8155923056
127.1565773627	42.3228553374	454.7159086953
127.1565897933	42.3228553374	454.6162250850
127.1566022239	42.3228553374	454.5165414746
127.1566146545	42.3228553374	454.4168578643
127.1566270851	42.3228553374	454.3171767441
127.1566395158	42.3228553374	454.2174975184
127.1566519464	42.3228553374	454.1178182926
127.1566643770	42.3228553374	454.0181390670
127.1566768076	42.3228553374	453.9184598412
127.1566892382	42.3228553374	453.8187806155
127.1567016689	42.3228553374	453.7191013897
127.1567140995	42.3228553374	453.6194192448
127.1567265301	42.3228553374	453.5197356169
127.1567389607	42.3228553374	453.4200519890
127.1567513913	42.3228553374	453.3203683611
127.1567638220	42.3228553374	453.2206847333
127.1567762526	42.3228553374	453.1210011053
127.1567886832	42.3228553374	453.0213174774
127.1568011138	42.3228553374	452.9354341042
127.1568135444	42.3228553374	452.8539481226
127.1568259751	42.3228553374	452.7724621411
127.1568384057	42.3228553374	452.6909761595
127.1568508363	42.3228553374	452.6094901779
127.1568632669	42.3228553374	452.5280041964
127.1568756975	42.3228553374	452.4465182148
127.1568881282	42.3228553374	452.3650359907
127.1569005588	42.3228553374	452.2835544113
127.1569129894	42.3228553374	452.2020728319
127.1569254200	42.3228553374	452.1205912526
127.1569378506	42.3228553374	452.0391096731
127.1569502813	42.3228553374	451.9576280937
127.1569627119	42.3228553374	451.8761465144
127.1569751425	42.3228553374	451.7946607582
127.1569875731	42.3228553374	451.7131747766
127.1570000037	42.3228553374	451.6316887950
127.1570124344	42.3228553374	451.5502028133
127.1570248650	42.3228553374	451.4687168318
127.1570372956	42.3228553374	451.3872308502
127.1570497262	42.3228553374	451.3057448678
127.1570621568	42.3228553374	451.2242588687
127.1570745875	42.3228553374	451.1427728695
127.1570870181	42.3228553374	451.0612868703
127.1570994487	42.3228553374	450.9798008711
127.1571118793	42.3228553374	450.8983148719
127.1571243099	42.3228553374	450.8168288728
127.1571367406	42.3228553374	450.7378565623
127.1571491712	42.3228553374	450.6744239547
127.1571616018	42.3228553374	450.6109913472
127.1571740324	42.3228553374	450.5475587396
127.1571864630	42.3228553374	450.4841261320
127.1571988937	42.3228553374	450.4206935245
127.1572113243	42.3228553374	450.3572609169
127.1572237549	42.3228553374	450.2938283094
127.1572361855	42.3228553374	450.2303957018
127.1572486161	42.3228553374	450.1669630942
127.1572610468	42.3228553374	450.1035304867
127.1572734774	42.3228553374	450.0400978791
127.1572859080	42.3228553374	449.9766652716
127.1562914584	42.3228644891	456.7683946169
127.1563038890	42.3228644891	456.6687114779
127.1563163196	42.3228644891	456.5690283388
127.1563287503	42.3228644891	456.4693451998
127.1563411809	42.3228644891	456.3696620607
127.1563536115	42.3228644891	456.2699789217
127.1563660421	42.3228644891	456.1702967542
127.1563784727	42.3228644891	456.0706170572
127.1563909034	42.3228644891	455.9709373602
127.1564033340	42.3228644891	455.8712576632
127.1564157646	42.3228644891	455.7715779662
127.1564281952	42.3228644891	455.6718982693
127.1564406258	42.3228644891	455.5722185723
127.1564530565	42.3228644891	455.4725390598
127.1564654871	42.3228644891	455.3728598518
127.1564779177	42.3228644891	455.2731806436
127.1564903483	42.3228644891	455.1735014354
127.1565027789	42.3228644891	455.0738222273
127.1565152096	42.3228644891	454.9741430191
127.1565276402	42.3228644891	454.8744638111
127.1565400708	42.3228644891	454.7747827448
127.1565525014	42.3228644891	454.6750996057
127.1565649320	42.3228644891	454.5754164668
127.1565773627	42.3228644891	454.4757333277
127.1565897933	42.3228644891	454.3760501886
127.1566022239	42.3228644891	454.2763670495
127.1566146545	42.3228644891	454.1766839104
127.1566270851	42.3228644891	454.0770027263
127.1566395158	42.3228644891	453.9773230293
127.1566519464	42.3228644891	453.8776433323
127.1566643770	42.3228644891	453.7779636354
127.1566768076	42.3228644891	453.6782839384
127.1566892382	42.3228644891	453.5786042413
127.1567016689	42.3228644891	453.4789245443
127.1567140995	42.3228644891	453.3792422406
127.1567265301	42.3228644891	453.2795586128
127.1567389607	42.3228644891	453.1798749849
127.1567513913	42.3228644891	453.0801913569
127.1567638220	42.3228644891	452.9805077291
127.1567762526	42.3228644891	452.8808241012
127.1567886832	42.3228644891	452.7811404732
127.1568011138	42.3228644891	452.6967227228
127.1568135444	42.3228644891	452.6171693782
127.1568259751	42.3228644891	452.5376160337
127.1568384057	42.3228644891	452.4580626892
127.1568508363	42.3228644891	452.3785093446
127.1568632669	42.3228644891	452.2989560001
127.1568756975	42.3228644891	452.2194026555
127.1568881282	42.3228644891	452.1398526663
127.1569005588	42.3228644891	452.0603032526
127.1569129894	42.3228644891	451.9807538390
127.1569254200	42.3228644891	451.9012044254
127.1569378506	42.3228644891	451.8216550118
127.1569502813	42.3228644891	451.7421055981
127.1569627119	42.3228644891	451.6625561846
127.1569751425	42.3228644891	451.5830030413
127.1569875731	42.3228644891	451.5034496967
127.1570000037	42.3228644891	451.4238963521
127.1570124344	42.3228644891	451.3443430075
127.1570248650	42.3228644891	451.2647896631
127.1570372956	42.3228644891	451.1852363185
127.1570497262	42.3228644891	451.1056829524
127.1570621568	42.3228644891	451.0261291191
127.1570745875	42.3228644891	450.9465752856
127.1570870181	42.3228644891	450.8670214522
127.1570994487	42.3228644891	450.7874676188
127.1571118793	42.3228644891	450.7079137853
127.1571243099	42.3228644891	450.6283599520
127.1571367406	42.3228644891	450.5510508451
127.1571491712	42.3228644891	450.4876187088
127.1571616018	42.3228644891	450.4241865726
127.1571740324	42.3228644891	450.3607544362
127.1571864630	42.3228644891	450.2973222999
127.1571988937	42.3228644891	450.2338901636
127.1572113243	42.3228644891	450.1704580273
127.1572237549	42.3228644891	450.1070258910
127.1572361855	42.3228644891	450.0435937547
127.1572486161	42.3228644891	449.9801616184
127.1572610468	42.3228644891	449.9167294822
127.1572734774	42.3228644891	449.8532973458
127.1572859080	42.3228644891	449.7898652095
127.1562914584	42.3228736408	456.5282181722
127.1563038890	42.3228736408	456.4285355044
127.1563163196	42.3228736408	456.3288528366
127.1563287503	42.3228736408	456.2291701688
127.1563411809	42.3228736408	456.1294875010
127.1563536115	42.3228736408	456.0298048332
127.1563660421	42.3228736408	455.9301228710
127.1563784727	42.3228736408	455.8304427027
127.1563909034	42.3228736408	455.7307625345
127.1564033340	42.3228736408	455.6310823662
127.1564157646	42.3228736408	455.5314021979
127.1564281952	42.3228736408	455.4317220298
127.1564406258	42.3228736408	455.3320418615
127.1564530565	42.3228736408	455.2323620556
127.1564654871	42.3228736408	455.1326828476
127.1564779177	42.3228736408	455.0330036394
127.1564903483	42.3228736408	454.9333244313
127.1565027789	42.3228736408	454.8336452231
127.1565152096	42.3228736408	454.7339660150
127.1565276402	42.3228736408	454.6342868069
127.1565400708	42.3228736408	454.5346059634
127.1565525014	42.3228736408	454.4349232956
127.1565649320	42.3228736408	454.3352406279
127.1565773627	42.3228736408	454.2355579601
127.1565897933	42.3228736408	454.1358752923
127.1566022239	42.3228736408	454.0361926244
127.1566146545	42.3228736408	453.9365099566
127.1566270851	42.3228736408	453.8368287084
127.1566395158	42.3228736408	453.7371485402
127.1566519464	42.3228736408	453.6374683719
127.1566643770	42.3228736408	453.5377882037
127.1566768076	42.3228736408	453.4381080355
127.1566892382	42.3228736408	453.3384278672
127.1567016689	42.3228736408	453.2387476989
127.1567140995	42.3228736408	453.1390652365
127.1567265301	42.3228736408	453.0393816086
127.1567389607	42.3228736408	452.9396979807
127.1567513913	42.3228736408	452.8400143528
127.1567638220	42.3228736408	452.7403307249
127.1567762526	42.3228736408	452.6406470970
127.1567886832	42.3228736408	452.5409634691
127.1568011138	42.3228736408	452.4580113413
127.1568135444	42.3228736408	452.3803906338
127.1568259751	42.3228736408	452.3027699263
127.1568384057	42.3228736408	452.2251492188
127.1568508363	42.3228736408	452.1475285113
127.1568632669	42.3228736408	452.0699078038
127.1568756975	42.3228736408	451.9922870963
127.1568881282	42.3228736408	451.9146693418
127.1569005588	42.3228736408	451.8370520939
127.1569129894	42.3228736408	451.7594348461
127.1569254200	42.3228736408	451.6818175983
127.1569378506	42.3228736408	451.6042003504
127.1569502813	42.3228736408	451.5265831025
127.1569627119	42.3228736408	451.4489658547
127.1569751425	42.3228736408	451.3713453244
127.1569875731	42.3228736408	451.2937246168
127.1570000037	42.3228736408	451.2161039093
127.1570124344	42.3228736408	451.1384832017
127.1570248650	42.3228736408	451.0608624943
127.1570372956	42.3228736408	450.9832417867
127.1570497262	42.3228736408	450.9056210369
127.1570621568	42.3228736408	450.8279993694
127.1570745875	42.3228736408	450.7503777017
127.1570870181	42.3228736408	450.6727560341
127.1570994487	42.3228736408	450.5951343664
127.1571118793	42.3228736408	450.5175126988
127.1571243099	42.3228736408	450.4398910312
127.1571367406	42.3228736408	450.3642451280
127.1571491712	42.3228736408	450.3008134629
127.1571616018	42.3228736408	450.2373817979
127.1571740324	42.3228736408	450.1739501329
127.1571864630	42.3228736408	450.1105184678
127.1571988937	42.3228736408	450.0470868028
127.1572113243	42.3228736408	449.9836551377
127.1572237549	42.3228736408	449.9202234727
127.1572361855	42.3228736408	449.8567918077
127.1572486161	42.3228736408	449.7933601426
127.1572610468	42.3228736408	449.7299284776
127.1572734774	42.3228736408	449.6664968126
127.1572859080	42.3228736408	449.6030651475
127.1562914584	42.3228827925	456.2880417273
127.1563038890	42.3228827925	456.1883595307
127.1563163196	42.3228827925	456.0886773341
127.1563287503	42.3228827925	455.9889951377
127.1563411809	42.3228827925	455.8893129411
127.1563536115	42.3228827925	455.7896307446
127.1563660421	42.3228827925	455.6899489876
127.1563784727	42.3228827925	455.5902683481
127.1563909034	42.3228827925	455.4905877085
127.1564033340	42.3228827925	455.3909070690
127.1564157646	42.3228827925	455.2912264295
127.1564281952	42.3228827925	455.1915457901
127.1564406258	42.3228827925	455.0918651505
127.1564530565	42.3228827925	454.9921850513
127.1564654871	42.3228827925	454.8925058433
127.1564779177	42.3228827925	454.7928266351
127.1564903483	42.3228827925	454.6931474270
127.1565027789	42.3228827925	454.5934682188
127.1565152096	42.3228827925	454.4937890106
127.1565276402	42.3228827925	454.3941098026
127.1565400708	42.3228827925	454.2944291818
127.1565525014	42.3228827925	454.1947469853
127.1565649320	42.3228827925	454.0950647888
127.1565773627	42.3228827925	453.9953825923
127.1565897933	42.3228827925	453.8957003957
127.1566022239	42.3228827925	453.7960181992
127.1566146545	42.3228827925	453.6963360026
127.1566270851	42.3228827925	453.5966546904
127.1566395158	42.3228827925	453.4969740509
127.1566519464	42.3228827925	453.3972934113
127.1566643770	42.3228827925	453.2976127719
127.1566768076	42.3228827925	453.1979321324
127.1566892382	42.3228827925	453.0982514929
127.1567016689	42.3228827925	452.9985708533
127.1567140995	42.3228827925	452.8988882321
127.1567265301	42.3228827925	452.7992046043
127.1567389607	42.3228827925	452.6995209764
127.1567513913	42.3228827925	452.5998373484
127.1567638220	42.3228827925	452.5001537206
127.1567762526	42.3228827925	452.4004700927
127.1567886832	42.3228827925	452.3007864647
127.1568011138	42.3228827925	452.2192999597
127.1568135444	42.3228827925	452.1436118892
127.1568259751	42.3228827925	452.0679238188
127.1568384057	42.3228827925	451.9922357483
127.1568508363	42.3228827925	451.9165476778
127.1568632669	42.3228827925	451.8408596074
127.1568756975	42.3228827925	451.7651715369
127.1568881282	42.3228827925	451.6894860172
127.1569005588	42.3228827925	451.6138009351
127.1569129894	42.3228827925	451.5381158530
127.1569254200	42.3228827925	451.4624307710
127.1569378506	42.3228827925	451.3867456889
127.1569502813	42.3228827925	451.3110606068
127.1569627119	42.3228827925	451.2353755248
127.1569751425	42.3228827925	451.1596876073
127.1569875731	42.3228827925	451.0839995368
127.1570000037	42.3228827925	451.0083114663
127.1570124344	42.3228827925	450.9326233958
127.1570248650	42.3228827925	450.8569353254
127.1570372956	42.3228827925	450.7812472549
127.1570497262	42.3228827925	450.7055591213
127.1570621568	42.3228827925	450.6298696196
127.1570745875	42.3228827925	450.5541801177
127.1570870181	42.3228827925	450.4784906158
127.1570994487	42.3228827925	450.4028011139
127.1571118793	42.3228827925	450.3271116121
127.1571243099	42.3228827925	450.2514221103
127.1571367406	42.3228827925	450.1774394107
127.1571491712	42.3228827925	450.1140082169
127.1571616018	42.3228827925	450.0505770232
127.1571740324	42.3228827925	449.9871458294
127.1571864630	42.3228827925	449.9237146356
127.1571988937	42.3228827925	449.8602834418
127.1572113243	42.3228827925	449.7968522480
127.1572237549	42.3228827925	449.7334210543
127.1572361855	42.3228827925	449.6699898605
127.1572486161	42.3228827925	449.6065586667
127.1572610468	42.3228827925	449.5431274729
127.1572734774	42.3228827925	449.4796962791
127.1572859080	42.3228827925	449.4162650853
127.1562914584	42.3228919443	456.0478652825
127.1563038890	42.3228919443	455.9481835572
127.1563163196	42.3228919443	455.8485018319
127.1563287503	42.3228919443	455.7488201067
127.1563411809	42.3228919443	455.6491383814
127.1563536115	42.3228919443	455.5494566561
127.1563660421	42.3228919443	455.4497751044
127.1563784727	42.3228919443	455.3500939936
127.1563909034	42.3228919443	455.2504128828
127.1564033340	42.3228919443	455.1507317720
127.1564157646	42.3228919443	455.0510506612
127.1564281952	42.3228919443	454.9513695505
127.1564406258	42.3228919443	454.8516884398
127.1564530565	42.3228919443	454.7520080472
127.1564654871	42.3228919443	454.6523288391
127.1564779177	42.3228919443	454.5526496310
127.1564903483	42.3228919443	454.4529704228
127.1565027789	42.3228919443	454.3532912146
127.1565152096	42.3228919443	454.2536120065
127.1565276402	42.3228919443	454.1539327984
127.1565400708	42.3228919443	454.0542524005
127.1565525014	42.3228919443	453.9545706752
127.1565649320	42.3228919443	453.8548889500
127.1565773627	42.3228919443	453.7552072247
127.1565897933	42.3228919443	453.6555254994
127.1566022239	42.3228919443	453.5558437741
127.1566146545	42.3228919443	453.4561620488
127.1566270851	42.3228919443	453.3564806726
127.1566395158	42.3228919443	453.2567995618
127.1566519464	42.3228919443	453.1571184510
127.1566643770	42.3228919443	453.0574373403
127.1566768076	42.3228919443	452.9577562295
127.1566892382	42.3228919443	452.8580751187
127.1567016689	42.3228919443	452.7583940079
127.1567140995	42.3228919443	452.6587112280
127.1567265301	42.3228919443	452.5590276001
127.1567389607	42.3228919443	452.4593439722
127.1567513913	42.3228919443	452.3596603443
127.1567638220	42.3228919443	452.2599767165
127.1567762526	42.3228919443	452.1602930885
127.1567886832	42.3228919443	452.0606094606
127.1568011138	42.3228919443	451.9805885782
127.1568135444	42.3228919443	451.9068331448
127.1568259751	42.3228919443	451.8330777114
127.1568384057	42.3228919443	451.7593222779
127.1568508363	42.3228919443	451.6855668445
127.1568632669	42.3228919443	451.6118114111
127.1568756975	42.3228919443	451.5380559776
127.1568881282	42.3228919443	451.4643026927
127.1569005588	42.3228919443	451.3905497764
127.1569129894	42.3228919443	451.3167968601
127.1569254200	42.3228919443	451.2430439438
127.1569378506	42.3228919443	451.1692910275
127.1569502813	42.3228919443	451.0955381112
127.1569627119	42.3228919443	451.0217851949
[truncated: 4,076 more rows]
