# Supplementary material for: Simulation Study on Coverage Path Planning of Autonomous Tasks in Hilly Farmland Based on Energy Consumption Model
Source: Hindawi journal article supplement (doi:10.1155/2020/4535734), 2020-08-30
Supplement: f1 [file 4535734.f1.zip › 4535734.f1/Algorithm-pathplanning-matlab/2020.04.25/0505/2.csv]

Longitude	Latitude	Elevation
127.1566391441	42.3233495304	0.0000000000
127.1565795812	42.3232138154	0.0000000000
127.1562914584	42.3229674764	0.0000000000
127.1571831737	42.3226723029	0.0000000000
127.1572778156	42.3227160023	0.0000000000
127.1572859080	42.3227969782	0.0000000000
127.1572034034	42.3229040799	0.0000000000
127.1572540874	42.3230766580	0.0000000000
127.1572300234	42.3232296015	0.0000000000
127.1571279667	42.3232701689	0.0000000000
127.1566391441	42.3233495304	0.0000000000
