# Supplementary material for: Simulation Study on Coverage Path Planning of Autonomous Tasks in Hilly Farmland Based on Energy Consumption Model
Source: Hindawi journal article supplement (doi:10.1155/2020/4535734), 2020-08-30
Supplement: f1 [file 4535734.f1.zip › 4535734.f1/Algorithm-pathplanning-matlab/2020.04.25/0606/1.csv]

Longitude	Latitude	Elevation
127.1547979273	42.3223209331	486.7960225001
127.1548102196	42.3223209331	486.6571279569
127.1548225120	42.3223209331	486.5182334136
127.1548348043	42.3223209331	486.3793388703
127.1548470966	42.3223209331	486.2404443271
127.1548593890	42.3223209331	486.1015497838
127.1548716813	42.3223209331	485.9626552406
127.1548839737	42.3223209331	485.8237606973
127.1548962660	42.3223209331	485.6848661540
127.1549085583	42.3223209331	485.5459705944
127.1549208507	42.3223209331	485.4070736236
127.1549331430	42.3223209331	485.2681766526
127.1549454353	42.3223209331	485.1292796818
127.1549577277	42.3223209331	484.9903827110
127.1549700200	42.3223209331	484.8514857400
127.1549823124	42.3223209331	484.7125887692
127.1549946047	42.3223209331	484.5736932811
127.1550068970	42.3223209331	484.4347997092
127.1550191894	42.3223209331	484.2959061375
127.1550314817	42.3223209331	484.1570125658
127.1550437740	42.3223209331	484.0181189939
127.1550560664	42.3223209331	483.8792254222
127.1550683587	42.3223209331	483.7403318505
127.1550806510	42.3223209331	483.6014378378
127.1550929434	42.3223209331	483.4625432946
127.1551052357	42.3223209331	483.3236487514
127.1551175281	42.3223209331	483.1847542080
127.1551298204	42.3223209331	483.0458596648
127.1551421127	42.3223209331	482.9069651216
127.1551544051	42.3223209331	482.7680705782
127.1551666974	42.3223209331	482.6291744330
127.1551789897	42.3223209331	482.4902764907
127.1551912821	42.3223209331	482.3513785482
127.1552035744	42.3223209331	482.2124806059
127.1552158668	42.3223209331	482.0735826636
127.1552281591	42.3223209331	481.9346847211
127.1552404514	42.3223209331	481.7957867788
127.1552527438	42.3223209331	481.6568888364
127.1552650361	42.3223209331	481.5179908940
127.1552773284	42.3223209331	481.3790929516
127.1552896208	42.3223209331	481.2401950093
127.1553019131	42.3223209331	481.1012970668
127.1553142054	42.3223209331	480.9623991245
127.1553264978	42.3223209331	480.8235011822
127.1553387901	42.3223209331	480.6846037317
127.1553510825	42.3223209331	480.5457067609
127.1553633748	42.3223209331	480.4068097901
127.1553756671	42.3223209331	480.2679128191
127.1553879595	42.3223209331	480.1290158483
127.1554002518	42.3223209331	479.9901188775
127.1554125441	42.3223209331	479.8512219065
127.1554248365	42.3223209331	479.7126312569
127.1554371288	42.3223209331	479.5743189325
127.1554494211	42.3223209331	479.4360066079
127.1554617135	42.3223209331	479.2976942835
127.1554740058	42.3223209331	479.1593819592
127.1554862982	42.3223209331	479.0210696346
127.1554985905	42.3223209331	478.8827573102
127.1555108828	42.3223209331	478.7444449858
127.1555231752	42.3223209331	478.6061326613
127.1555354675	42.3223209331	478.4678203369
127.1555477598	42.3223209331	478.3295080125
127.1555600522	42.3223209331	478.1911956879
127.1555723445	42.3223209331	478.0528833636
127.1555846369	42.3223209331	477.9145710392
127.1555969292	42.3223209331	477.7767674912
127.1556092215	42.3223209331	477.6393652685
127.1556215139	42.3223209331	477.5019630459
127.1556338062	42.3223209331	477.3645608231
127.1556460985	42.3223209331	477.2271586004
127.1556583909	42.3223209331	477.0897563777
127.1556706832	42.3223209331	476.9523541549
127.1556829755	42.3223209331	476.8149513721
127.1556952679	42.3223209331	476.6775481779
127.1557075602	42.3223209331	476.5401449836
127.1557198526	42.3223209331	476.4027417894
127.1557321449	42.3223209331	476.2653385953
127.1557444372	42.3223209331	476.1279354009
127.1557567296	42.3223209331	475.9905322068
127.1557690219	42.3223209331	475.8735905535
127.1557813142	42.3223209331	475.7705359725
127.1557936066	42.3223209331	475.6674813916
127.1558058989	42.3223209331	475.5644268106
127.1558181913	42.3223209331	475.4613722296
127.1558304836	42.3223209331	475.3583176487
127.1558427759	42.3223209331	475.2552630677
127.1558550683	42.3223209331	475.1522090809
127.1558673606	42.3223209331	475.0491554715
127.1547979273	42.3223300007	486.5437321834
127.1548102196	42.3223300007	486.4048381020
127.1548225120	42.3223300007	486.2659440203
127.1548348043	42.3223300007	486.1270499388
127.1548470966	42.3223300007	485.9881558574
127.1548593890	42.3223300007	485.8492617757
127.1548716813	42.3223300007	485.7103676942
127.1548839737	42.3223300007	485.5714736128
127.1548962660	42.3223300007	485.4325795311
127.1549085583	42.3223300007	485.2936840466
127.1549208507	42.3223300007	485.1547866141
127.1549331430	42.3223300007	485.0158891814
127.1549454353	42.3223300007	484.8769917488
127.1549577277	42.3223300007	484.7380943163
127.1549700200	42.3223300007	484.5991968836
127.1549823124	42.3223300007	484.4602994510
127.1549946047	42.3223300007	484.3214037026
127.1550068970	42.3223300007	484.1825101308
127.1550191894	42.3223300007	484.0436165591
127.1550314817	42.3223300007	483.9047229874
127.1550437740	42.3223300007	483.7658294155
127.1550560664	42.3223300007	483.6269358438
127.1550683587	42.3223300007	483.4880422721
127.1550806510	42.3223300007	483.3491484689
127.1550929434	42.3223300007	483.2102543874
127.1551052357	42.3223300007	483.0713603059
127.1551175281	42.3223300007	482.9324662243
127.1551298204	42.3223300007	482.7935721428
127.1551421127	42.3223300007	482.6546780613
127.1551544051	42.3223300007	482.5157839797
127.1551666974	42.3223300007	482.3768880786
127.1551789897	42.3223300007	482.2379901362
127.1551912821	42.3223300007	482.0990921938
127.1552035744	42.3223300007	481.9601942514
127.1552158668	42.3223300007	481.8212963091
127.1552281591	42.3223300007	481.6823983667
127.1552404514	42.3223300007	481.5435004243
127.1552527438	42.3223300007	481.4046024820
127.1552650361	42.3223300007	481.2657045395
127.1552773284	42.3223300007	481.1268065972
127.1552896208	42.3223300007	480.9879086549
127.1553019131	42.3223300007	480.8490107124
127.1553142054	42.3223300007	480.7101127701
127.1553264978	42.3223300007	480.5712148278
127.1553387901	42.3223300007	480.4323171435
127.1553510825	42.3223300007	480.2934197109
127.1553633748	42.3223300007	480.1545222784
127.1553756671	42.3223300007	480.0156248456
127.1553879595	42.3223300007	479.8767274131
127.1554002518	42.3223300007	479.7378299805
127.1554125441	42.3223300007	479.5989325478
127.1554248365	42.3223300007	479.4603830469
127.1554371288	42.3223300007	479.3221496788
127.1554494211	42.3223300007	479.1839163104
127.1554617135	42.3223300007	479.0456829422
127.1554740058	42.3223300007	478.9074495741
127.1554862982	42.3223300007	478.7692162057
127.1554985905	42.3223300007	478.6309828375
127.1555108828	42.3223300007	478.4927494694
127.1555231752	42.3223300007	478.3545161010
127.1555354675	42.3223300007	478.2162827328
127.1555477598	42.3223300007	478.0780493646
127.1555600522	42.3223300007	477.9398159963
127.1555723445	42.3223300007	477.8015826281
127.1555846369	42.3223300007	477.6633492599
127.1555969292	42.3223300007	477.5255802710
127.1556092215	42.3223300007	477.3881775866
127.1556215139	42.3223300007	477.2507749022
127.1556338062	42.3223300007	477.1133722176
127.1556460985	42.3223300007	476.9759695332
127.1556583909	42.3223300007	476.8385668488
127.1556706832	42.3223300007	476.7011641643
127.1556829755	42.3223300007	476.5637611859
127.1556952679	42.3223300007	476.4263579918
127.1557075602	42.3223300007	476.2889547975
127.1557198526	42.3223300007	476.1515516033
127.1557321449	42.3223300007	476.0141484091
127.1557444372	42.3223300007	475.8767452148
127.1557567296	42.3223300007	475.7393420206
127.1557690219	42.3223300007	475.6224035914
127.1557813142	42.3223300007	475.5193490104
127.1557936066	42.3223300007	475.4162944294
127.1558058989	42.3223300007	475.3132398485
127.1558181913	42.3223300007	475.2101852675
127.1558304836	42.3223300007	475.1071306865
127.1558427759	42.3223300007	475.0040761056
127.1558550683	42.3223300007	474.9010218364
127.1558673606	42.3223300007	474.7979677652
127.1547979273	42.3223390682	486.2914418667
127.1548102196	42.3223390682	486.1525482470
127.1548225120	42.3223390682	486.0136546271
127.1548348043	42.3223390682	485.8747610073
127.1548470966	42.3223390682	485.7358673876
127.1548593890	42.3223390682	485.5969737677
127.1548716813	42.3223390682	485.4580801479
127.1548839737	42.3223390682	485.3191865282
127.1548962660	42.3223390682	485.1802929083
127.1549085583	42.3223390682	485.0413974989
127.1549208507	42.3223390682	484.9024996046
127.1549331430	42.3223390682	484.7636017102
127.1549454353	42.3223390682	484.6247038159
127.1549577277	42.3223390682	484.4858059216
127.1549700200	42.3223390682	484.3469080272
127.1549823124	42.3223390682	484.2080101329
127.1549946047	42.3223390682	484.0691141242
127.1550068970	42.3223390682	483.9302205523
127.1550191894	42.3223390682	483.7913269806
127.1550314817	42.3223390682	483.6524334089
127.1550437740	42.3223390682	483.5135398370
127.1550560664	42.3223390682	483.3746462653
127.1550683587	42.3223390682	483.2357526936
127.1550806510	42.3223390682	483.0968590999
127.1550929434	42.3223390682	482.9579654802
127.1551052357	42.3223390682	482.8190718605
127.1551175281	42.3223390682	482.6801782405
127.1551298204	42.3223390682	482.5412846208
127.1551421127	42.3223390682	482.4023910010
127.1551544051	42.3223390682	482.2634973811
127.1551666974	42.3223390682	482.1246017241
127.1551789897	42.3223390682	481.9857037818
127.1551912821	42.3223390682	481.8468058393
127.1552035744	42.3223390682	481.7079078970
127.1552158668	42.3223390682	481.5690099547
127.1552281591	42.3223390682	481.4301120122
127.1552404514	42.3223390682	481.2912140699
127.1552527438	42.3223390682	481.1523161276
127.1552650361	42.3223390682	481.0134181851
127.1552773284	42.3223390682	480.8745202428
127.1552896208	42.3223390682	480.7356223005
127.1553019131	42.3223390682	480.5967243580
127.1553142054	42.3223390682	480.4578264157
127.1553264978	42.3223390682	480.3189284734
127.1553387901	42.3223390682	480.1800305552
127.1553510825	42.3223390682	480.0411326609
127.1553633748	42.3223390682	479.9022347666
127.1553756671	42.3223390682	479.7633368722
127.1553879595	42.3223390682	479.6244389779
127.1554002518	42.3223390682	479.4855410836
127.1554125441	42.3223390682	479.3466431892
127.1554248365	42.3223390682	479.2081348370
127.1554371288	42.3223390682	479.0699804250
127.1554494211	42.3223390682	478.9318260129
127.1554617135	42.3223390682	478.7936716009
127.1554740058	42.3223390682	478.6555171890
127.1554862982	42.3223390682	478.5173627768
127.1554985905	42.3223390682	478.3792083649
127.1555108828	42.3223390682	478.2410539529
127.1555231752	42.3223390682	478.1028995407
127.1555354675	42.3223390682	477.9647451288
127.1555477598	42.3223390682	477.8265907168
127.1555600522	42.3223390682	477.6884363047
127.1555723445	42.3223390682	477.5502818927
127.1555846369	42.3223390682	477.4121274807
127.1555969292	42.3223390682	477.2743930507
127.1556092215	42.3223390682	477.1369899046
127.1556215139	42.3223390682	476.9995867585
127.1556338062	42.3223390682	476.8621836122
127.1556460985	42.3223390682	476.7247804660
127.1556583909	42.3223390682	476.5873773199
127.1556706832	42.3223390682	476.4499741736
127.1556829755	42.3223390682	476.3125709998
127.1556952679	42.3223390682	476.1751678056
127.1557075602	42.3223390682	476.0377646113
127.1557198526	42.3223390682	475.9003614171
127.1557321449	42.3223390682	475.7629582230
127.1557444372	42.3223390682	475.6255550287
127.1557567296	42.3223390682	475.4881518345
127.1557690219	42.3223390682	475.3712166293
127.1557813142	42.3223390682	475.2681620482
127.1557936066	42.3223390682	475.1651074673
127.1558058989	42.3223390682	475.0620528864
127.1558181913	42.3223390682	474.9589983053
127.1558304836	42.3223390682	474.8559437244
127.1558427759	42.3223390682	474.7528891435
127.1558550683	42.3223390682	474.6498345918
127.1558673606	42.3223390682	474.5467800589
127.1547979273	42.3223481358	486.0391522117
127.1548102196	42.3223481358	485.9002586400
127.1548225120	42.3223481358	485.7613650681
127.1548348043	42.3223481358	485.6224714964
127.1548470966	42.3223481358	485.4835779247
127.1548593890	42.3223481358	485.3446843528
127.1548716813	42.3223481358	485.2057907811
127.1548839737	42.3223481358	485.0668972094
127.1548962660	42.3223481358	484.9280036375
127.1549085583	42.3223481358	484.7891084092
127.1549208507	42.3223481358	484.6502108805
127.1549331430	42.3223481358	484.5113133517
127.1549454353	42.3223481358	484.3724158231
127.1549577277	42.3223481358	484.2335182945
127.1549700200	42.3223481358	484.0946207657
127.1549823124	42.3223481358	483.9557232371
127.1549946047	42.3223481358	483.8168272541
127.1550068970	42.3223481358	483.6779332685
127.1550191894	42.3223481358	483.5390392831
127.1550314817	42.3223481358	483.4001452977
127.1550437740	42.3223481358	483.2612513121
127.1550560664	42.3223481358	483.1223573267
127.1550683587	42.3223481358	482.9834633413
127.1550806510	42.3223481358	482.8445695435
127.1550929434	42.3223481358	482.7056759718
127.1551052357	42.3223481358	482.5667824001
127.1551175281	42.3223481358	482.4278888282
127.1551298204	42.3223481358	482.2889952565
127.1551421127	42.3223481358	482.1501016848
127.1551544051	42.3223481358	482.0112081129
127.1551666974	42.3223481358	481.8723126763
127.1551789897	42.3223481358	481.7334151477
127.1551912821	42.3223481358	481.5945176189
127.1552035744	42.3223481358	481.4556200902
127.1552158668	42.3223481358	481.3167225616
127.1552281591	42.3223481358	481.1778250328
127.1552404514	42.3223481358	481.0389275042
127.1552527438	42.3223481358	480.9000297734
127.1552650361	42.3223481358	480.7611318309
127.1552773284	42.3223481358	480.6222338886
127.1552896208	42.3223481358	480.4833359462
127.1553019131	42.3223481358	480.3444380038
127.1553142054	42.3223481358	480.2055400614
127.1553264978	42.3223481358	480.0666421191
127.1553387901	42.3223481358	479.9277441766
127.1553510825	42.3223481358	479.7888462343
127.1553633748	42.3223481358	479.6499482920
127.1553756671	42.3223481358	479.5110503495
127.1553879595	42.3223481358	479.3721524072
127.1554002518	42.3223481358	479.2332544649
127.1554125441	42.3223481358	479.0943565224
127.1554248365	42.3223481358	478.9558892991
127.1554371288	42.3223481358	478.8178134297
127.1554494211	42.3223481358	478.6797375601
127.1554617135	42.3223481358	478.5416616906
127.1554740058	42.3223481358	478.4035858211
127.1554862982	42.3223481358	478.2655099515
127.1554985905	42.3223481358	478.1274340821
127.1555108828	42.3223481358	477.9893582126
127.1555231752	42.3223481358	477.8512823430
127.1555354675	42.3223481358	477.7132064735
127.1555477598	42.3223481358	477.5751306040
127.1555600522	42.3223481358	477.4370547344
127.1555723445	42.3223481358	477.2989788650
127.1555846369	42.3223481358	477.1609029955
127.1555969292	42.3223481358	477.0232031733
127.1556092215	42.3223481358	476.8857999792
127.1556215139	42.3223481358	476.7483967850
127.1556338062	42.3223481358	476.6109935907
127.1556460985	42.3223481358	476.4735903965
127.1556583909	42.3223481358	476.3361872023
127.1556706832	42.3223481358	476.1987840080
127.1556829755	42.3223481358	476.0613810524
127.1556952679	42.3223481358	475.9239782719
127.1557075602	42.3223481358	475.7865754913
127.1557198526	42.3223481358	475.6491727108
127.1557321449	42.3223481358	475.5117699303
127.1557444372	42.3223481358	475.3743671497
127.1557567296	42.3223481358	475.2369643692
127.1557690219	42.3223481358	475.1200270245
127.1557813142	42.3223481358	475.0169728572
127.1557936066	42.3223481358	474.9139186900
127.1558058989	42.3223481358	474.8108645227
127.1558181913	42.3223481358	474.7078103554
127.1558304836	42.3223481358	474.6047561881
127.1558427759	42.3223481358	474.5017020209
127.1558550683	42.3223481358	474.3986476005
127.1558673606	42.3223481358	474.2955930196
127.1547979273	42.3223572034	485.7868626332
127.1548102196	42.3223572034	485.6479690615
127.1548225120	42.3223572034	485.5090754896
127.1548348043	42.3223572034	485.3701819179
127.1548470966	42.3223572034	485.2312883462
127.1548593890	42.3223572034	485.0923947743
127.1548716813	42.3223572034	484.9535012026
127.1548839737	42.3223572034	484.8146076309
127.1548962660	42.3223572034	484.6757140591
127.1549085583	42.3223572034	484.5368190240
127.1549208507	42.3223572034	484.3979219571
127.1549331430	42.3223572034	484.2590248901
127.1549454353	42.3223572034	484.1201278232
127.1549577277	42.3223572034	483.9812307563
127.1549700200	42.3223572034	483.8423336892
127.1549823124	42.3223572034	483.7034366223
127.1549946047	42.3223572034	483.5645406982
127.1550068970	42.3223572034	483.4256462509
127.1550191894	42.3223572034	483.2867518038
127.1550314817	42.3223572034	483.1478573567
127.1550437740	42.3223572034	483.0089629094
127.1550560664	42.3223572034	482.8700684622
127.1550683587	42.3223572034	482.7311740151
127.1550806510	42.3223572034	482.5922799650
127.1550929434	42.3223572034	482.4533863933
127.1551052357	42.3223572034	482.3144928216
127.1551175281	42.3223572034	482.1755992497
127.1551298204	42.3223572034	482.0367056780
127.1551421127	42.3223572034	481.8978121063
127.1551544051	42.3223572034	481.7589185345
127.1551666974	42.3223572034	481.6200233154
127.1551789897	42.3223572034	481.4811262485
127.1551912821	42.3223572034	481.3422291815
127.1552035744	42.3223572034	481.2033321146
127.1552158668	42.3223572034	481.0644350477
127.1552281591	42.3223572034	480.9255379807
127.1552404514	42.3223572034	480.7866409138
127.1552527438	42.3223572034	480.6477434189
127.1552650361	42.3223572034	480.5088454764
127.1552773284	42.3223572034	480.3699475341
127.1552896208	42.3223572034	480.2310495918
127.1553019131	42.3223572034	480.0921516493
127.1553142054	42.3223572034	479.9532537070
127.1553264978	42.3223572034	479.8143557647
127.1553387901	42.3223572034	479.6754578222
127.1553510825	42.3223572034	479.5365598799
127.1553633748	42.3223572034	479.3976619376
127.1553756671	42.3223572034	479.2587639951
127.1553879595	42.3223572034	479.1198660528
127.1554002518	42.3223572034	478.9809681105
127.1554125441	42.3223572034	478.8420701680
127.1554248365	42.3223572034	478.7036440713
127.1554371288	42.3223572034	478.5656466963
127.1554494211	42.3223572034	478.4276493212
127.1554617135	42.3223572034	478.2896519462
127.1554740058	42.3223572034	478.1516545712
127.1554862982	42.3223572034	478.0136571961
127.1554985905	42.3223572034	477.8756598211
127.1555108828	42.3223572034	477.7376624461
127.1555231752	42.3223572034	477.5996650709
127.1555354675	42.3223572034	477.4616676960
127.1555477598	42.3223572034	477.3236703210
127.1555600522	42.3223572034	477.1856729458
127.1555723445	42.3223572034	477.0476755708
127.1555846369	42.3223572034	476.9096781959
127.1555969292	42.3223572034	476.7720129872
127.1556092215	42.3223572034	476.6346097930
127.1556215139	42.3223572034	476.4972065989
127.1556338062	42.3223572034	476.3598034045
127.1556460985	42.3223572034	476.2224002104
127.1556583909	42.3223572034	476.0849970162
127.1556706832	42.3223572034	475.9475938219
127.1556829755	42.3223572034	475.8101911325
127.1556952679	42.3223572034	475.6727888137
127.1557075602	42.3223572034	475.5353864948
127.1557198526	42.3223572034	475.3979841761
127.1557321449	42.3223572034	475.2605818573
127.1557444372	42.3223572034	475.1231795384
127.1557567296	42.3223572034	474.9857772197
127.1557690219	42.3223572034	474.8688371127
127.1557813142	42.3223572034	474.7657834071
127.1557936066	42.3223572034	474.6627297016
127.1558058989	42.3223572034	474.5596759961
127.1558181913	42.3223572034	474.4566222905
127.1558304836	42.3223572034	474.3535685850
127.1558427759	42.3223572034	474.2505148795
127.1558550683	42.3223572034	474.1474606384
127.1558673606	42.3223572034	474.0444060575
127.1547979273	42.3223662709	485.5345730548
127.1548102196	42.3223662709	485.3956794831
127.1548225120	42.3223662709	485.2567859112
127.1548348043	42.3223662709	485.1178923395
127.1548470966	42.3223662709	484.9789987678
127.1548593890	42.3223662709	484.8401051959
127.1548716813	42.3223662709	484.7012116242
127.1548839737	42.3223662709	484.5623180525
127.1548962660	42.3223662709	484.4234244806
127.1549085583	42.3223662709	484.2845296389
127.1549208507	42.3223662709	484.1456330337
127.1549331430	42.3223662709	484.0067364284
127.1549454353	42.3223662709	483.8678398232
127.1549577277	42.3223662709	483.7289432181
127.1549700200	42.3223662709	483.5900466128
127.1549823124	42.3223662709	483.4511500076
127.1549946047	42.3223662709	483.3122541424
127.1550068970	42.3223662709	483.1733592334
127.1550191894	42.3223662709	483.0344643245
127.1550314817	42.3223662709	482.8955694156
127.1550437740	42.3223662709	482.7566745066
127.1550560664	42.3223662709	482.6177795977
127.1550683587	42.3223662709	482.4788846889
127.1550806510	42.3223662709	482.3399903866
127.1550929434	42.3223662709	482.2010968149
127.1551052357	42.3223662709	482.0622032432
127.1551175281	42.3223662709	481.9233096713
127.1551298204	42.3223662709	481.7844160996
127.1551421127	42.3223662709	481.6455225279
127.1551544051	42.3223662709	481.5066289560
127.1551666974	42.3223662709	481.3677339546
127.1551789897	42.3223662709	481.2288373494
127.1551912821	42.3223662709	481.0899407441
127.1552035744	42.3223662709	480.9510441390
127.1552158668	42.3223662709	480.8121475338
127.1552281591	42.3223662709	480.6732509285
127.1552404514	42.3223662709	480.5343543233
127.1552527438	42.3223662709	480.3954570645
127.1552650361	42.3223662709	480.2565591220
127.1552773284	42.3223662709	480.1176611797
127.1552896208	42.3223662709	479.9787632374
127.1553019131	42.3223662709	479.8398652949
127.1553142054	42.3223662709	479.7009673526
127.1553264978	42.3223662709	479.5620694103
127.1553387901	42.3223662709	479.4231714678
127.1553510825	42.3223662709	479.2842735255
127.1553633748	42.3223662709	479.1453755832
127.1553756671	42.3223662709	479.0064776407
127.1553879595	42.3223662709	478.8675796984
127.1554002518	42.3223662709	478.7286817560
127.1554125441	42.3223662709	478.5897838136
127.1554248365	42.3223662709	478.4513988435
127.1554371288	42.3223662709	478.3134799630
127.1554494211	42.3223662709	478.1755610823
127.1554617135	42.3223662709	478.0376422018
127.1554740058	42.3223662709	477.8997233213
127.1554862982	42.3223662709	477.7618044406
127.1554985905	42.3223662709	477.6238855601
127.1555108828	42.3223662709	477.4859666796
127.1555231752	42.3223662709	477.3480477989
127.1555354675	42.3223662709	477.2101289184
127.1555477598	42.3223662709	477.0722100379
127.1555600522	42.3223662709	476.9342911572
127.1555723445	42.3223662709	476.7963722767
127.1555846369	42.3223662709	476.6584533962
127.1555969292	42.3223662709	476.5208228010
127.1556092215	42.3223662709	476.3834196069
127.1556215139	42.3223662709	476.2460164127
127.1556338062	42.3223662709	476.1086132184
127.1556460985	42.3223662709	475.9712100242
127.1556583909	42.3223662709	475.8338068301
127.1556706832	42.3223662709	475.6964036357
127.1556829755	42.3223662709	475.5590012125
127.1556952679	42.3223662709	475.4215993555
127.1557075602	42.3223662709	475.2841974984
127.1557198526	42.3223662709	475.1467956414
127.1557321449	42.3223662709	475.0093937844
127.1557444372	42.3223662709	474.8719919272
127.1557567296	42.3223662709	474.7345900702
127.1557690219	42.3223662709	474.6176472009
127.1557813142	42.3223662709	474.5145939570
127.1557936066	42.3223662709	474.4115407133
127.1558058989	42.3223662709	474.3084874695
127.1558181913	42.3223662709	474.2054342256
127.1558304836	42.3223662709	474.1023809818
127.1558427759	42.3223662709	473.9993277381
127.1558550683	42.3223662709	473.8962736763
127.1558673606	42.3223662709	473.7932190953
127.1547979273	42.3223753385	485.2822834763
127.1548102196	42.3223753385	485.1433899046
127.1548225120	42.3223753385	485.0044963327
127.1548348043	42.3223753385	484.8656027610
127.1548470966	42.3223753385	484.7267091893
127.1548593890	42.3223753385	484.5878156174
127.1548716813	42.3223753385	484.4489220457
127.1548839737	42.3223753385	484.3100284740
127.1548962660	42.3223753385	484.1711349022
127.1549085583	42.3223753385	484.0322402537
127.1549208507	42.3223753385	483.8933441103
127.1549331430	42.3223753385	483.7544479667
127.1549454353	42.3223753385	483.6155518233
127.1549577277	42.3223753385	483.4766556799
127.1549700200	42.3223753385	483.3377595363
127.1549823124	42.3223753385	483.1988633929
127.1549946047	42.3223753385	483.0599675865
127.1550068970	42.3223753385	482.9210722158
127.1550191894	42.3223753385	482.7821768452
127.1550314817	42.3223753385	482.6432814746
127.1550437740	42.3223753385	482.5043861038
127.1550560664	42.3223753385	482.3654907332
127.1550683587	42.3223753385	482.2265953626
127.1550806510	42.3223753385	482.0877008081
127.1550929434	42.3223753385	481.9488072364
127.1551052357	42.3223753385	481.8099136647
127.1551175281	42.3223753385	481.6710200928
127.1551298204	42.3223753385	481.5321265211
127.1551421127	42.3223753385	481.3932329494
127.1551544051	42.3223753385	481.2543393775
127.1551666974	42.3223753385	481.1154445938
127.1551789897	42.3223753385	480.9765484503
127.1551912821	42.3223753385	480.8376523068
127.1552035744	42.3223753385	480.6987561633
127.1552158668	42.3223753385	480.5598600199
127.1552281591	42.3223753385	480.4209638763
127.1552404514	42.3223753385	480.2820677329
127.1552527438	42.3223753385	480.1431707101
127.1552650361	42.3223753385	480.0042727676
127.1552773284	42.3223753385	479.8653748253
127.1552896208	42.3223753385	479.7264768830
127.1553019131	42.3223753385	479.5875789405
127.1553142054	42.3223753385	479.4486809982
127.1553264978	42.3223753385	479.3097830558
127.1553387901	42.3223753385	479.1708851134
127.1553510825	42.3223753385	479.0319871710
127.1553633748	42.3223753385	478.8930892287
127.1553756671	42.3223753385	478.7541912862
127.1553879595	42.3223753385	478.6152933439
127.1554002518	42.3223753385	478.4763954016
127.1554125441	42.3223753385	478.3374974591
127.1554248365	42.3223753385	478.1991536157
127.1554371288	42.3223753385	478.0613132296
127.1554494211	42.3223753385	477.9234728434
127.1554617135	42.3223753385	477.7856324574
127.1554740058	42.3223753385	477.6477920714
127.1554862982	42.3223753385	477.5099516852
127.1554985905	42.3223753385	477.3721112991
127.1555108828	42.3223753385	477.2342709131
127.1555231752	42.3223753385	477.0964305269
127.1555354675	42.3223753385	476.9585901409
127.1555477598	42.3223753385	476.8207497548
127.1555600522	42.3223753385	476.6829093686
127.1555723445	42.3223753385	476.5450689826
127.1555846369	42.3223753385	476.4072285966
127.1555969292	42.3223753385	476.2696326149
127.1556092215	42.3223753385	476.1322294207
127.1556215139	42.3223753385	475.9948262266
127.1556338062	42.3223753385	475.8574230322
127.1556460985	42.3223753385	475.7200198381
127.1556583909	42.3223753385	475.5826166439
127.1556706832	42.3223753385	475.4452134496
127.1556829755	42.3223753385	475.3078112926
127.1556952679	42.3223753385	475.1704098973
127.1557075602	42.3223753385	475.0330085019
127.1557198526	42.3223753385	474.8956071066
127.1557321449	42.3223753385	474.7582057114
127.1557444372	42.3223753385	474.6208043159
127.1557567296	42.3223753385	474.4834029207
127.1557690219	42.3223753385	474.3664572891
127.1557813142	42.3223753385	474.2634045069
127.1557936066	42.3223753385	474.1603517249
127.1558058989	42.3223753385	474.0572989429
127.1558181913	42.3223753385	473.9542461607
127.1558304836	42.3223753385	473.8511933787
127.1558427759	42.3223753385	473.7481405966
127.1558550683	42.3223753385	473.6450867141
127.1558673606	42.3223753385	473.5420321332
127.1547979273	42.3223844061	485.0299938979
127.1548102196	42.3223844061	484.8911003262
127.1548225120	42.3223844061	484.7522067543
127.1548348043	42.3223844061	484.6133131826
127.1548470966	42.3223844061	484.4744196109
127.1548593890	42.3223844061	484.3355260390
127.1548716813	42.3223844061	484.1966324673
127.1548839737	42.3223844061	484.0577388956
127.1548962660	42.3223844061	483.9188453237
127.1549085583	42.3223844061	483.7799508686
127.1549208507	42.3223844061	483.6410551869
127.1549331430	42.3223844061	483.5021595050
127.1549454353	42.3223844061	483.3632638234
127.1549577277	42.3223844061	483.2243681417
127.1549700200	42.3223844061	483.0854724598
127.1549823124	42.3223844061	482.9465767781
127.1549946047	42.3223844061	482.8076810307
127.1550068970	42.3223844061	482.6687851982
127.1550191894	42.3223844061	482.5298893659
127.1550314817	42.3223844061	482.3909935335
127.1550437740	42.3223844061	482.2520977010
127.1550560664	42.3223844061	482.1132018687
127.1550683587	42.3223844061	481.9743060364
127.1550806510	42.3223844061	481.8354112297
127.1550929434	42.3223844061	481.6965176580
127.1551052357	42.3223844061	481.5576240863
127.1551175281	42.3223844061	481.4187305144
127.1551298204	42.3223844061	481.2798369427
127.1551421127	42.3223844061	481.1409433710
127.1551544051	42.3223844061	481.0020497991
127.1551666974	42.3223844061	480.8631552329
127.1551789897	42.3223844061	480.7242595512
127.1551912821	42.3223844061	480.5853638694
127.1552035744	42.3223844061	480.4464681877
127.1552158668	42.3223844061	480.3075725060
127.1552281591	42.3223844061	480.1686768241
127.1552404514	42.3223844061	480.0297811424
127.1552527438	42.3223844061	479.8908843556
127.1552650361	42.3223844061	479.7519864132
127.1552773284	42.3223844061	479.6130884708
127.1552896208	42.3223844061	479.4741905285
127.1553019131	42.3223844061	479.3352925860
127.1553142054	42.3223844061	479.1963946437
127.1553264978	42.3223844061	479.0574967014
127.1553387901	42.3223844061	478.9185987589
127.1553510825	42.3223844061	478.7797008166
127.1553633748	42.3223844061	478.6408028743
127.1553756671	42.3223844061	478.5019049318
127.1553879595	42.3223844061	478.3630069895
127.1554002518	42.3223844061	478.2241090472
127.1554125441	42.3223844061	478.0852111047
127.1554248365	42.3223844061	477.9469083879
127.1554371288	42.3223844061	477.8091464963
127.1554494211	42.3223844061	477.6713846046
127.1554617135	42.3223844061	477.5336227130
127.1554740058	42.3223844061	477.3958608214
127.1554862982	42.3223844061	477.2580989297
127.1554985905	42.3223844061	477.1203370382
127.1555108828	42.3223844061	476.9825751466
127.1555231752	42.3223844061	476.8448132549
127.1555354675	42.3223844061	476.7070513633
127.1555477598	42.3223844061	476.5692894718
127.1555600522	42.3223844061	476.4315275800
127.1555723445	42.3223844061	476.2937656885
127.1555846369	42.3223844061	476.1560037969
127.1555969292	42.3223844061	476.0184424288
127.1556092215	42.3223844061	475.8810392346
127.1556215139	42.3223844061	475.7436360404
127.1556338062	42.3223844061	475.6062328461
127.1556460985	42.3223844061	475.4688296519
127.1556583909	42.3223844061	475.3314264578
127.1556706832	42.3223844061	475.1940232634
127.1556829755	42.3223844061	475.0566213727
127.1556952679	42.3223844061	474.9192204392
127.1557075602	42.3223844061	474.7818195055
127.1557198526	42.3223844061	474.6444185719
127.1557321449	42.3223844061	474.5070176384
127.1557444372	42.3223844061	474.3696167047
127.1557567296	42.3223844061	474.2322157711
127.1557690219	42.3223844061	474.1152673773
127.1557813142	42.3223844061	474.0122150568
127.1557936066	42.3223844061	473.9091627365
127.1558058989	42.3223844061	473.8061104162
127.1558181913	42.3223844061	473.7030580958
127.1558304836	42.3223844061	473.6000057755
127.1558427759	42.3223844061	473.4969534552
127.1558550683	42.3223844061	473.3938997520
127.1558673606	42.3223844061	473.2908451711
127.1547979273	42.3223934736	484.7777043196
127.1548102196	42.3223934736	484.6388107479
127.1548225120	42.3223934736	484.4999171760
127.1548348043	42.3223934736	484.3610236043
127.1548470966	42.3223934736	484.2221300326
127.1548593890	42.3223934736	484.0832364607
127.1548716813	42.3223934736	483.9443428890
127.1548839737	42.3223934736	483.8054493173
127.1548962660	42.3223934736	483.6665557454
127.1549085583	42.3223934736	483.5276614837
127.1549208507	42.3223934736	483.3887662637
127.1549331430	42.3223934736	483.2498710436
127.1549454353	42.3223934736	483.1109758236
127.1549577277	42.3223934736	482.9720806036
127.1549700200	42.3223934736	482.8331853835
127.1549823124	42.3223934736	482.6942901636
127.1549946047	42.3223934736	482.5553944751
127.1550068970	42.3223934736	482.4164981808
127.1550191894	42.3223934736	482.2776018868
127.1550314817	42.3223934736	482.1387055927
127.1550437740	42.3223934736	481.9998092985
127.1550560664	42.3223934736	481.8609130044
127.1550683587	42.3223934736	481.7220167103
127.1550806510	42.3223934736	481.5831216514
127.1550929434	42.3223934736	481.4442280797
127.1551052357	42.3223934736	481.3053345080
127.1551175281	42.3223934736	481.1664409361
127.1551298204	42.3223934736	481.0275473644
127.1551421127	42.3223934736	480.8886537927
127.1551544051	42.3223934736	480.7497602208
127.1551666974	42.3223934736	480.6108658723
127.1551789897	42.3223934736	480.4719706523
127.1551912821	42.3223934736	480.3330754322
127.1552035744	42.3223934736	480.1941802123
127.1552158668	42.3223934736	480.0552849923
127.1552281591	42.3223934736	479.9163897722
127.1552404514	42.3223934736	479.7774945522
127.1552527438	42.3223934736	479.6385980014
127.1552650361	42.3223934736	479.4997000589
127.1552773284	42.3223934736	479.3608021166
127.1552896208	42.3223934736	479.2219041743
127.1553019131	42.3223934736	479.0830062318
127.1553142054	42.3223934736	478.9441082895
127.1553264978	42.3223934736	478.8052103472
127.1553387901	42.3223934736	478.6663124047
127.1553510825	42.3223934736	478.5274144624
127.1553633748	42.3223934736	478.3885165201
127.1553756671	42.3223934736	478.2496185776
127.1553879595	42.3223934736	478.1107206353
127.1554002518	42.3223934736	477.9718226929
127.1554125441	42.3223934736	477.8329247505
127.1554248365	42.3223934736	477.6946631602
127.1554371288	42.3223934736	477.5569797631
127.1554494211	42.3223934736	477.4192963659
127.1554617135	42.3223934736	477.2816129688
127.1554740058	42.3223934736	477.1439295717
127.1554862982	42.3223934736	477.0062461745
127.1554985905	42.3223934736	476.8685627774
127.1555108828	42.3223934736	476.7308793803
127.1555231752	42.3223934736	476.5931959831
127.1555354675	42.3223934736	476.4555125860
127.1555477598	42.3223934736	476.3178291889
127.1555600522	42.3223934736	476.1801457916
127.1555723445	42.3223934736	476.0424623946
127.1555846369	42.3223934736	475.9047789975
127.1555969292	42.3223934736	475.7672522428
127.1556092215	42.3223934736	475.6298490486
127.1556215139	42.3223934736	475.4924458545
127.1556338062	42.3223934736	475.3550426601
127.1556460985	42.3223934736	475.2176394660
127.1556583909	42.3223934736	475.0802362718
127.1556706832	42.3223934736	474.9428330775
127.1556829755	42.3223934736	474.8054314530
127.1556952679	42.3223934736	474.6680309812
127.1557075602	42.3223934736	474.5306305092
127.1557198526	42.3223934736	474.3932300374
127.1557321449	42.3223934736	474.2558295656
127.1557444372	42.3223934736	474.1184290936
127.1557567296	42.3223934736	473.9810286218
127.1557690219	42.3223934736	473.8640774656
127.1557813142	42.3223934736	473.7610256070
127.1557936066	42.3223934736	473.6579737484
127.1558058989	42.3223934736	473.5549218898
127.1558181913	42.3223934736	473.4518700311
127.1558304836	42.3223934736	473.3488181725
127.1558427759	42.3223934736	473.2457663140
127.1558550683	42.3223934736	473.1427127901
127.1558673606	42.3223934736	473.0396582092
127.1547979273	42.3224025412	484.5254147412
127.1548102196	42.3224025412	484.3865211694
127.1548225120	42.3224025412	484.2476275976
127.1548348043	42.3224025412	484.1087340259
127.1548470966	42.3224025412	483.9698404542
127.1548593890	42.3224025412	483.8309468823
127.1548716813	42.3224025412	483.6920533106
127.1548839737	42.3224025412	483.5531597389
127.1548962660	42.3224025412	483.4142661670
127.1549085583	42.3224025412	483.2753720985
127.1549208507	42.3224025412	483.1364773403
127.1549331430	42.3224025412	482.9975825819
127.1549454353	42.3224025412	482.8586878237
127.1549577277	42.3224025412	482.7197930654
127.1549700200	42.3224025412	482.5808983070
127.1549823124	42.3224025412	482.4420035488
127.1549946047	42.3224025412	482.3031079192
127.1550068970	42.3224025412	482.1642111633
127.1550191894	42.3224025412	482.0253144075
127.1550314817	42.3224025412	481.8864176517
127.1550437740	42.3224025412	481.7475208957
127.1550560664	42.3224025412	481.6086241399
127.1550683587	42.3224025412	481.4697273841
127.1550806510	42.3224025412	481.3308320730
127.1550929434	42.3224025412	481.1919385013
127.1551052357	42.3224025412	481.0530449295
127.1551175281	42.3224025412	480.9141513577
127.1551298204	42.3224025412	480.7752577860
127.1551421127	42.3224025412	480.6363642143
127.1551544051	42.3224025412	480.4974706424
127.1551666974	42.3224025412	480.3585765115
127.1551789897	42.3224025412	480.2196817532
127.1551912821	42.3224025412	480.0807869948
127.1552035744	42.3224025412	479.9418922366
127.1552158668	42.3224025412	479.8029974784
127.1552281591	42.3224025412	479.6641027200
127.1552404514	42.3224025412	479.5252079618
127.1552527438	42.3224025412	479.3863116470
127.1552650361	42.3224025412	479.2474137045
127.1552773284	42.3224025412	479.1085157622
127.1552896208	42.3224025412	478.9696178199
127.1553019131	42.3224025412	478.8307198774
127.1553142054	42.3224025412	478.6918219351
127.1553264978	42.3224025412	478.5529239928
127.1553387901	42.3224025412	478.4140260503
127.1553510825	42.3224025412	478.2751281080
127.1553633748	42.3224025412	478.1362301656
127.1553756671	42.3224025412	477.9973322232
127.1553879595	42.3224025412	477.8584342808
127.1554002518	42.3224025412	477.7195363385
127.1554125441	42.3224025412	477.5806383960
127.1554248365	42.3224025412	477.4424179324
127.1554371288	42.3224025412	477.3048130298
127.1554494211	42.3224025412	477.1672081270
127.1554617135	42.3224025412	477.0296032244
127.1554740058	42.3224025412	476.8919983218
127.1554862982	42.3224025412	476.7543934190
127.1554985905	42.3224025412	476.6167885164
127.1555108828	42.3224025412	476.4791836138
127.1555231752	42.3224025412	476.3415787110
127.1555354675	42.3224025412	476.2039738084
127.1555477598	42.3224025412	476.0663689058
127.1555600522	42.3224025412	475.9287640030
127.1555723445	42.3224025412	475.7911591004
127.1555846369	42.3224025412	475.6535541978
127.1555969292	42.3224025412	475.5160620567
127.1556092215	42.3224025412	475.3786588625
127.1556215139	42.3224025412	475.2412556683
127.1556338062	42.3224025412	475.1038524740
127.1556460985	42.3224025412	474.9664492798
127.1556583909	42.3224025412	474.8290460857
127.1556706832	42.3224025412	474.6916428913
127.1556829755	42.3224025412	474.5542415331
127.1556952679	42.3224025412	474.4168415230
127.1557075602	42.3224025412	474.2794415127
127.1557198526	42.3224025412	474.1420415027
127.1557321449	42.3224025412	474.0046414926
127.1557444372	42.3224025412	473.8672414823
127.1557567296	42.3224025412	473.7298414723
127.1557690219	42.3224025412	473.6128875538
127.1557813142	42.3224025412	473.5098361569
127.1557936066	42.3224025412	473.4067847600
127.1558058989	42.3224025412	473.3037333632
127.1558181913	42.3224025412	473.2006819662
127.1558304836	42.3224025412	473.0976305694
127.1558427759	42.3224025412	472.9945791725
127.1558550683	42.3224025412	472.8915258280
127.1558673606	42.3224025412	472.7884712471
127.1547979273	42.3224116088	484.2731251627
127.1548102196	42.3224116088	484.1342315910
127.1548225120	42.3224116088	483.9953380191
127.1548348043	42.3224116088	483.8564444474
127.1548470966	42.3224116088	483.7175508757
127.1548593890	42.3224116088	483.5786573038
127.1548716813	42.3224116088	483.4397637321
127.1548839737	42.3224116088	483.3008701604
127.1548962660	42.3224116088	483.1619765885
127.1549085583	42.3224116088	483.0230827134
127.1549208507	42.3224116088	482.8841884169
127.1549331430	42.3224116088	482.7452941202
127.1549454353	42.3224116088	482.6063998237
127.1549577277	42.3224116088	482.4675055272
127.1549700200	42.3224116088	482.3286112306
127.1549823124	42.3224116088	482.1897169341
127.1549946047	42.3224116088	482.0508213634
127.1550068970	42.3224116088	481.9119241457
127.1550191894	42.3224116088	481.7730269281
127.1550314817	42.3224116088	481.6341297106
127.1550437740	42.3224116088	481.4952324929
127.1550560664	42.3224116088	481.3563352754
127.1550683587	42.3224116088	481.2174380579
127.1550806510	42.3224116088	481.0785424945
127.1550929434	42.3224116088	480.9396489228
127.1551052357	42.3224116088	480.8007553511
127.1551175281	42.3224116088	480.6618617792
127.1551298204	42.3224116088	480.5229682075
127.1551421127	42.3224116088	480.3840746358
127.1551544051	42.3224116088	480.2451810639
127.1551666974	42.3224116088	480.1062871506
127.1551789897	42.3224116088	479.9673928541
127.1551912821	42.3224116088	479.8284985575
127.1552035744	42.3224116088	479.6896042610
127.1552158668	42.3224116088	479.5507099645
127.1552281591	42.3224116088	479.4118156678
127.1552404514	42.3224116088	479.2729213713
127.1552527438	42.3224116088	479.1340252926
127.1552650361	42.3224116088	478.9951273501
127.1552773284	42.3224116088	478.8562294078
127.1552896208	42.3224116088	478.7173314654
127.1553019131	42.3224116088	478.5784335230
127.1553142054	42.3224116088	478.4395355806
127.1553264978	42.3224116088	478.3006376383
127.1553387901	42.3224116088	478.1617396958
127.1553510825	42.3224116088	478.0228417535
127.1553633748	42.3224116088	477.8839438112
127.1553756671	42.3224116088	477.7450458687
127.1553879595	42.3224116088	477.6061479264
127.1554002518	42.3224116088	477.4672499841
127.1554125441	42.3224116088	477.3283520416
127.1554248365	42.3224116088	477.1901727046
127.1554371288	42.3224116088	477.0526462964
127.1554494211	42.3224116088	476.9151198881
127.1554617135	42.3224116088	476.7775934800
127.1554740058	42.3224116088	476.6400670719
127.1554862982	42.3224116088	476.5025406636
127.1554985905	42.3224116088	476.3650142554
127.1555108828	42.3224116088	476.2274878473
127.1555231752	42.3224116088	476.0899614390
127.1555354675	42.3224116088	475.9524350309
127.1555477598	42.3224116088	475.8149086227
127.1555600522	42.3224116088	475.6773822144
127.1555723445	42.3224116088	475.5398558063
127.1555846369	42.3224116088	475.4023293982
127.1555969292	42.3224116088	475.2648718705
127.1556092215	42.3224116088	475.1274686764
127.1556215139	42.3224116088	474.9900654822
127.1556338062	42.3224116088	474.8526622879
127.1556460985	42.3224116088	474.7152590937
127.1556583909	42.3224116088	474.5778558995
127.1556706832	42.3224116088	474.4404527052
127.1556829755	42.3224116088	474.3030516131
127.1556952679	42.3224116088	474.1656520648
127.1557075602	42.3224116088	474.0282525163
127.1557198526	42.3224116088	473.8908529679
127.1557321449	42.3224116088	473.7534534196
127.1557444372	42.3224116088	473.6160538711
127.1557567296	42.3224116088	473.4786543227
127.1557690219	42.3224116088	473.3616976420
127.1557813142	42.3224116088	473.2586467068
127.1557936066	42.3224116088	473.1555957717
127.1558058989	42.3224116088	473.0525448366
127.1558181913	42.3224116088	472.9494939013
127.1558304836	42.3224116088	472.8464429662
127.1558427759	42.3224116088	472.7433920311
127.1558550683	42.3224116088	472.6403388659
127.1558673606	42.3224116088	472.5372842849
127.1547979273	42.3224206764	484.0208355842
127.1548102196	42.3224206764	483.8819420125
127.1548225120	42.3224206764	483.7430484407
127.1548348043	42.3224206764	483.6041548690
127.1548470966	42.3224206764	483.4652612972
127.1548593890	42.3224206764	483.3263677254
127.1548716813	42.3224206764	483.1874741537
127.1548839737	42.3224206764	483.0485805820
127.1548962660	42.3224206764	482.9096870101
127.1549085583	42.3224206764	482.7707933282
127.1549208507	42.3224206764	482.6318994935
127.1549331430	42.3224206764	482.4930056586
127.1549454353	42.3224206764	482.3541118238
127.1549577277	42.3224206764	482.2152179890
127.1549700200	42.3224206764	482.0763241541
127.1549823124	42.3224206764	481.9374303193
127.1549946047	42.3224206764	481.7985348075
127.1550068970	42.3224206764	481.6596371281
127.1550191894	42.3224206764	481.5207394488
127.1550314817	42.3224206764	481.3818417696
127.1550437740	42.3224206764	481.2429440902
127.1550560664	42.3224206764	481.1040464109
127.1550683587	42.3224206764	480.9651487316
127.1550806510	42.3224206764	480.8262529161
127.1550929434	42.3224206764	480.6873593444
127.1551052357	42.3224206764	480.5484657726
127.1551175281	42.3224206764	480.4095722008
127.1551298204	42.3224206764	480.2706786291
127.1551421127	42.3224206764	480.1317850574
127.1551544051	42.3224206764	479.9928914855
127.1551666974	42.3224206764	479.8539977898
127.1551789897	42.3224206764	479.7151039550
127.1551912821	42.3224206764	479.5762101201
127.1552035744	42.3224206764	479.4373162853
127.1552158668	42.3224206764	479.2984224506
127.1552281591	42.3224206764	479.1595286156
127.1552404514	42.3224206764	479.0206347809
127.1552527438	42.3224206764	478.8817389381
127.1552650361	42.3224206764	478.7428409956
127.1552773284	42.3224206764	478.6039430533
127.1552896208	42.3224206764	478.4650451110
127.1553019131	42.3224206764	478.3261471685
127.1553142054	42.3224206764	478.1872492262
127.1553264978	42.3224206764	478.0483512839
127.1553387901	42.3224206764	477.9094533414
127.1553510825	42.3224206764	477.7705553991
127.1553633748	42.3224206764	477.6316574568
127.1553756671	42.3224206764	477.4927595143
127.1553879595	42.3224206764	477.3538615720
127.1554002518	42.3224206764	477.2149636297
127.1554125441	42.3224206764	477.0760656872
127.1554248365	42.3224206764	476.9379274768
127.1554371288	42.3224206764	476.8004795631
127.1554494211	42.3224206764	476.6630316493
127.1554617135	42.3224206764	476.5255837356
127.1554740058	42.3224206764	476.3881358220
127.1554862982	42.3224206764	476.2506879081
127.1554985905	42.3224206764	476.1132399945
127.1555108828	42.3224206764	475.9757920808
127.1555231752	42.3224206764	475.8383441670
127.1555354675	42.3224206764	475.7008962533
127.1555477598	42.3224206764	475.5634483397
127.1555600522	42.3224206764	475.4260004259
127.1555723445	42.3224206764	475.2885525122
127.1555846369	42.3224206764	475.1511045985
127.1555969292	42.3224206764	475.0136816844
127.1556092215	42.3224206764	474.8762784902
127.1556215139	42.3224206764	474.7388752960
127.1556338062	42.3224206764	474.6014721017
127.1556460985	42.3224206764	474.4640689075
127.1556583909	42.3224206764	474.3266657134
127.1556706832	42.3224206764	474.1892625191
127.1556829755	42.3224206764	474.0518616932
127.1556952679	42.3224206764	473.9144626066
127.1557075602	42.3224206764	473.7770635198
127.1557198526	42.3224206764	473.6396644332
127.1557321449	42.3224206764	473.5022653466
127.1557444372	42.3224206764	473.3648662598
127.1557567296	42.3224206764	473.2274671732
127.1557690219	42.3224206764	473.1105077302
127.1557813142	42.3224206764	473.0074572567
127.1557936066	42.3224206764	472.9044067833
127.1558058989	42.3224206764	472.8013563099
127.1558181913	42.3224206764	472.6983058364
127.1558304836	42.3224206764	472.5952553631
127.1558427759	42.3224206764	472.4922048897
127.1558550683	42.3224206764	472.3891519037
127.1558673606	42.3224206764	472.2860973228
127.1547979273	42.3224297439	483.7685470756
127.1548102196	42.3224297439	483.6296537025
127.1548225120	42.3224297439	483.4907601700
127.1548348043	42.3224297439	483.3518663996
127.1548470966	42.3224297439	483.2129726292
127.1548593890	42.3224297439	483.0740788586
127.1548716813	42.3224297439	482.9351850883
127.1548839737	42.3224297439	482.7962913179
127.1548962660	42.3224297439	482.6573975473
127.1549085583	42.3224297439	482.5185038601
127.1549208507	42.3224297439	482.3796102884
127.1549331430	42.3224297439	482.2407167165
127.1549454353	42.3224297439	482.1018231448
127.1549577277	42.3224297439	481.9629295731
127.1549700200	42.3224297439	481.8240360013
127.1549823124	42.3224297439	481.6851424295
127.1549946047	42.3224297439	481.5462469513
127.1550068970	42.3224297439	481.4073490088
127.1550191894	42.3224297439	481.2684510665
127.1550314817	42.3224297439	481.1295531242
127.1550437740	42.3224297439	480.9906551817
127.1550560664	42.3224297439	480.8517572394
127.1550683587	42.3224297439	480.7128592971
127.1550806510	42.3224297439	480.5739633378
127.1550929434	42.3224297439	480.4350697661
127.1551052357	42.3224297439	480.2961761944
127.1551175281	42.3224297439	480.1572826225
127.1551298204	42.3224297439	480.0183890508
127.1551421127	42.3224297439	479.8794954791
127.1551544051	42.3224297439	479.7406019072
127.1551666974	42.3224297439	479.6017082419
127.1551789897	42.3224297439	479.4628144715
127.1551912821	42.3224297439	479.3239207009
127.1552035744	42.3224297439	479.1850269306
127.1552158668	42.3224297439	479.0461331602
127.1552281591	42.3224297439	478.9072393896
127.1552404514	42.3224297439	478.7683456192
127.1552527438	42.3224297439	478.6294665146
127.1552650361	42.3224297439	478.4906027445
127.1552773284	42.3224297439	478.3517389745
127.1552896208	42.3224297439	478.2128752045
127.1553019131	42.3224297439	478.0740114344
127.1553142054	42.3224297439	477.9351476644
127.1553264978	42.3224297439	477.7962838944
127.1553387901	42.3224297439	477.6574201243
127.1553510825	42.3224297439	477.5185563543
127.1553633748	42.3224297439	477.3796925843
127.1553756671	42.3224297439	477.2408288141
127.1553879595	42.3224297439	477.1019650442
127.1554002518	42.3224297439	476.9631012742
127.1554125441	42.3224297439	476.8242375040
127.1554248365	42.3224297439	476.6861388879
127.1554371288	42.3224297439	476.5487354951
127.1554494211	42.3224297439	476.4113321021
127.1554617135	42.3224297439	476.2739287093
127.1554740058	42.3224297439	476.1365253164
127.1554862982	42.3224297439	475.9991219234
127.1554985905	42.3224297439	475.8617185306
127.1555108828	42.3224297439	475.7243152453
127.1555231752	42.3224297439	475.5869120510
127.1555354675	42.3224297439	475.4495088568
127.1555477598	42.3224297439	475.3121056627
127.1555600522	42.3224297439	475.1747024683
127.1555723445	42.3224297439	475.0372992742
127.1555846369	42.3224297439	474.8998960800
127.1555969292	42.3224297439	474.7624928857
127.1556092215	42.3224297439	474.6250896915
127.1556215139	42.3224297439	474.4876864973
127.1556338062	42.3224297439	474.3502833030
127.1556460985	42.3224297439	474.2128801088
127.1556583909	42.3224297439	474.0754769147
127.1556706832	42.3224297439	473.9380737204
127.1556829755	42.3224297439	473.8006730462
127.1556952679	42.3224297439	473.6632742226
127.1557075602	42.3224297439	473.5258753989
127.1557198526	42.3224297439	473.3884765754
127.1557321449	42.3224297439	473.2510777518
127.1557444372	42.3224297439	473.1136789281
127.1557567296	42.3224297439	472.9762801045
127.1557690219	42.3224297439	472.8593190878
127.1557813142	42.3224297439	472.7562688773
127.1557936066	42.3224297439	472.6532186670
127.1558058989	42.3224297439	472.5501684567
127.1558181913	42.3224297439	472.4471182463
127.1558304836	42.3224297439	472.3440680359
127.1558427759	42.3224297439	472.2410178256
127.1558550683	42.3224297439	472.1379649418
127.1558673606	42.3224297439	472.0349103609
127.1547979273	42.3224388115	483.5162599829
127.1548102196	42.3224388115	483.3773670716
127.1548225120	42.3224388115	483.2384736303
127.1548348043	42.3224388115	483.0995793982
127.1548470966	42.3224388115	482.9606851661
127.1548593890	42.3224388115	482.8217909338
127.1548716813	42.3224388115	482.6828967017
127.1548839737	42.3224388115	482.5440024696
127.1548962660	42.3224388115	482.4051082373
127.1549085583	42.3224388115	482.2662142817
127.1549208507	42.3224388115	482.1273207100
127.1549331430	42.3224388115	481.9884271381
127.1549454353	42.3224388115	481.8495335664
127.1549577277	42.3224388115	481.7106399947
127.1549700200	42.3224388115	481.5717464228
127.1549823124	42.3224388115	481.4328528511
127.1549946047	42.3224388115	481.2939573728
127.1550068970	42.3224388115	481.1550594304
127.1550191894	42.3224388115	481.0161614880
127.1550314817	42.3224388115	480.8772635457
127.1550437740	42.3224388115	480.7383656033
127.1550560664	42.3224388115	480.5994676609
127.1550683587	42.3224388115	480.4605697186
127.1550806510	42.3224388115	480.3216737594
127.1550929434	42.3224388115	480.1827801876
127.1551052357	42.3224388115	480.0438866159
127.1551175281	42.3224388115	479.9049930441
127.1551298204	42.3224388115	479.7660994724
127.1551421127	42.3224388115	479.6272059006
127.1551544051	42.3224388115	479.4883123288
127.1551666974	42.3224388115	479.3494184458
127.1551789897	42.3224388115	479.2105242137
127.1551912821	42.3224388115	479.0716299814
127.1552035744	42.3224388115	478.9327357493
127.1552158668	42.3224388115	478.7938415172
127.1552281591	42.3224388115	478.6549472849
127.1552404514	42.3224388115	478.5160530528
127.1552527438	42.3224388115	478.3772125358
127.1552650361	42.3224388115	478.2384281836
127.1552773284	42.3224388115	478.0996438316
127.1552896208	42.3224388115	477.9608594795
127.1553019131	42.3224388115	477.8220751273
127.1553142054	42.3224388115	477.6832907753
127.1553264978	42.3224388115	477.5445064232
127.1553387901	42.3224388115	477.4057220710
127.1553510825	42.3224388115	477.2669377190
127.1553633748	42.3224388115	477.1281533669
127.1553756671	42.3224388115	476.9893690147
127.1553879595	42.3224388115	476.8505846627
127.1554002518	42.3224388115	476.7118003106
127.1554125441	42.3224388115	476.5730159584
127.1554248365	42.3224388115	476.4349549079
127.1554371288	42.3224388115	476.2975510534
127.1554494211	42.3224388115	476.1601471986
127.1554617135	42.3224388115	476.0227433440
127.1554740058	42.3224388115	475.8853394895
127.1554862982	42.3224388115	475.7479356347
127.1554985905	42.3224388115	475.6105317802
127.1555108828	42.3224388115	475.4731282832
127.1555231752	42.3224388115	475.3357250889
127.1555354675	42.3224388115	475.1983218947
127.1555477598	42.3224388115	475.0609187005
127.1555600522	42.3224388115	474.9235155062
127.1555723445	42.3224388115	474.7861123120
127.1555846369	42.3224388115	474.6487091179
127.1555969292	42.3224388115	474.5113059236
127.1556092215	42.3224388115	474.3739027294
127.1556215139	42.3224388115	474.2364995352
127.1556338062	42.3224388115	474.0990963409
127.1556460985	42.3224388115	473.9616931467
127.1556583909	42.3224388115	473.8242899526
127.1556706832	42.3224388115	473.6868867582
127.1556829755	42.3224388115	473.5494860841
127.1556952679	42.3224388115	473.4120872605
127.1557075602	42.3224388115	473.2746884368
127.1557198526	42.3224388115	473.1372896132
127.1557321449	42.3224388115	472.9998907897
127.1557444372	42.3224388115	472.8624919660
127.1557567296	42.3224388115	472.7250931424
127.1557690219	42.3224388115	472.6081321257
127.1557813142	42.3224388115	472.5050819152
127.1557936066	42.3224388115	472.4020317049
127.1558058989	42.3224388115	472.2989814946
127.1558181913	42.3224388115	472.1959312841
127.1558304836	42.3224388115	472.0928810738
127.1558427759	42.3224388115	471.9898308635
127.1558550683	42.3224388115	471.8867779797
127.1558673606	42.3224388115	471.7837233988
127.1547979273	42.3224478791	483.2639728902
127.1548102196	42.3224478791	483.1250804407
127.1548225120	42.3224478791	482.9861870907
127.1548348043	42.3224478791	482.8472923968
127.1548470966	42.3224478791	482.7083977030
127.1548593890	42.3224478791	482.5695030090
127.1548716813	42.3224478791	482.4306083151
127.1548839737	42.3224478791	482.2917136213
127.1548962660	42.3224478791	482.1528189273
127.1549085583	42.3224478791	482.0139247032
127.1549208507	42.3224478791	481.8750311315
127.1549331430	42.3224478791	481.7361375596
127.1549454353	42.3224478791	481.5972439879
127.1549577277	42.3224478791	481.4583504162
127.1549700200	42.3224478791	481.3194568443
127.1549823124	42.3224478791	481.1805632726
127.1549946047	42.3224478791	481.0416677944
127.1550068970	42.3224478791	480.9027698519
127.1550191894	42.3224478791	480.7638719096
127.1550314817	42.3224478791	480.6249739673
127.1550437740	42.3224478791	480.4860760248
127.1550560664	42.3224478791	480.3471780825
127.1550683587	42.3224478791	480.2082801402
127.1550806510	42.3224478791	480.0693841809
127.1550929434	42.3224478791	479.9304906092
127.1551052357	42.3224478791	479.7915970375
127.1551175281	42.3224478791	479.6527034656
127.1551298204	42.3224478791	479.5138098939
127.1551421127	42.3224478791	479.3749163222
127.1551544051	42.3224478791	479.2360227503
127.1551666974	42.3224478791	479.0971286497
127.1551789897	42.3224478791	478.9582339559
127.1551912821	42.3224478791	478.8193392619
127.1552035744	42.3224478791	478.6804445680
127.1552158668	42.3224478791	478.5415498742
127.1552281591	42.3224478791	478.4026551802
127.1552404514	42.3224478791	478.2637604863
127.1552527438	42.3224478791	478.1249585570
127.1552650361	42.3224478791	477.9862536228
127.1552773284	42.3224478791	477.8475486887
127.1552896208	42.3224478791	477.7088437545
127.1553019131	42.3224478791	477.5701388203
127.1553142054	42.3224478791	477.4314338862
127.1553264978	42.3224478791	477.2927289521
127.1553387901	42.3224478791	477.1540240178
127.1553510825	42.3224478791	477.0153190837
127.1553633748	42.3224478791	476.8766141496
127.1553756671	42.3224478791	476.7379092153
127.1553879595	42.3224478791	476.5992042812
127.1554002518	42.3224478791	476.4604993471
127.1554125441	42.3224478791	476.3217944129
127.1554248365	42.3224478791	476.1837709279
127.1554371288	42.3224478791	476.0463666116
127.1554494211	42.3224478791	475.9089622951
127.1554617135	42.3224478791	475.7715579788
127.1554740058	42.3224478791	475.6341536625
127.1554862982	42.3224478791	475.4967493461
127.1554985905	42.3224478791	475.3593450298
127.1555108828	42.3224478791	475.2219413211
127.1555231752	42.3224478791	475.0845381267
127.1555354675	42.3224478791	474.9471349326
127.1555477598	42.3224478791	474.8097317384
127.1555600522	42.3224478791	474.6723285441
127.1555723445	42.3224478791	474.5349253499
127.1555846369	42.3224478791	474.3975221558
127.1555969292	42.3224478791	474.2601189614
127.1556092215	42.3224478791	474.1227157673
127.1556215139	42.3224478791	473.9853125731
127.1556338062	42.3224478791	473.8479093788
127.1556460985	42.3224478791	473.7105061846
127.1556583909	42.3224478791	473.5731029904
127.1556706832	42.3224478791	473.4356997961
127.1556829755	42.3224478791	473.2982991219
127.1556952679	42.3224478791	473.1609002984
127.1557075602	42.3224478791	473.0235014747
127.1557198526	42.3224478791	472.8861026511
127.1557321449	42.3224478791	472.7487038276
127.1557444372	42.3224478791	472.6113050038
127.1557567296	42.3224478791	472.4739061803
127.1557690219	42.3224478791	472.3569451635
127.1557813142	42.3224478791	472.2538949531
127.1557936066	42.3224478791	472.1508447428
127.1558058989	42.3224478791	472.0477945325
127.1558181913	42.3224478791	471.9447443220
127.1558304836	42.3224478791	471.8416941117
127.1558427759	42.3224478791	471.7386439014
127.1558550683	42.3224478791	471.6355910176
127.1558673606	42.3224478791	471.5325364366
127.1547979273	42.3224569466	483.0116857975
127.1548102196	42.3224569466	482.8727938097
127.1548225120	42.3224569466	482.7339005510
127.1548348043	42.3224569466	482.5950053955
127.1548470966	42.3224569466	482.4561102399
127.1548593890	42.3224569466	482.3172150841
127.1548716813	42.3224569466	482.1783199285
127.1548839737	42.3224569466	482.0394247730
127.1548962660	42.3224569466	481.9005296172
127.1549085583	42.3224569466	481.7616351248
127.1549208507	42.3224569466	481.6227415531
127.1549331430	42.3224569466	481.4838479812
127.1549454353	42.3224569466	481.3449544095
127.1549577277	42.3224569466	481.2060608378
127.1549700200	42.3224569466	481.0671672659
127.1549823124	42.3224569466	480.9282736942
127.1549946047	42.3224569466	480.7893782159
127.1550068970	42.3224569466	480.6504802735
127.1550191894	42.3224569466	480.5115823311
127.1550314817	42.3224569466	480.3726843888
127.1550437740	42.3224569466	480.2337864463
127.1550560664	42.3224569466	480.0948885040
127.1550683587	42.3224569466	479.9559905617
127.1550806510	42.3224569466	479.8170946024
127.1550929434	42.3224569466	479.6782010307
127.1551052357	42.3224569466	479.5393074590
127.1551175281	42.3224569466	479.4004138872
127.1551298204	42.3224569466	479.2615203154
127.1551421127	42.3224569466	479.1226267437
127.1551544051	42.3224569466	478.9837331719
127.1551666974	42.3224569466	478.8448388537
127.1551789897	42.3224569466	478.7059436981
127.1551912821	42.3224569466	478.5670485423
127.1552035744	42.3224569466	478.4281533868
127.1552158668	42.3224569466	478.2892582312
127.1552281591	42.3224569466	478.1503630754
127.1552404514	42.3224569466	478.0114679199
127.1552527438	42.3224569466	477.8727045782
127.1552650361	42.3224569466	477.7340790619
127.1552773284	42.3224569466	477.5954535457
127.1552896208	42.3224569466	477.4568280296
127.1553019131	42.3224569466	477.3182025132
127.1553142054	42.3224569466	477.1795769971
127.1553264978	42.3224569466	477.0409514809
127.1553387901	42.3224569466	476.9023259646
127.1553510825	42.3224569466	476.7637004484
127.1553633748	42.3224569466	476.6250749322
127.1553756671	42.3224569466	476.4864494159
127.1553879595	42.3224569466	476.3478238998
127.1554002518	42.3224569466	476.2091983836
127.1554125441	42.3224569466	476.0705728673
127.1554248365	42.3224569466	475.9325869479
127.1554371288	42.3224569466	475.7951821699
127.1554494211	42.3224569466	475.6577773917
127.1554617135	42.3224569466	475.5203726136
127.1554740058	42.3224569466	475.3829678356
127.1554862982	42.3224569466	475.2455630574
127.1554985905	42.3224569466	475.1081582793
127.1555108828	42.3224569466	474.9707543589
127.1555231752	42.3224569466	474.8333511646
127.1555354675	42.3224569466	474.6959479705
127.1555477598	42.3224569466	474.5585447763
127.1555600522	42.3224569466	474.4211415820
127.1555723445	42.3224569466	474.2837383878
127.1555846369	42.3224569466	474.1463351936
127.1555969292	42.3224569466	474.0089319993
127.1556092215	42.3224569466	473.8715288051
127.1556215139	42.3224569466	473.7341256110
127.1556338062	42.3224569466	473.5967224167
127.1556460985	42.3224569466	473.4593192225
127.1556583909	42.3224569466	473.3219160283
127.1556706832	42.3224569466	473.1845128340
127.1556829755	42.3224569466	473.0471121598
127.1556952679	42.3224569466	472.9097133363
127.1557075602	42.3224569466	472.7723145125
127.1557198526	42.3224569466	472.6349156890
127.1557321449	42.3224569466	472.4975168654
127.1557444372	42.3224569466	472.3601180417
127.1557567296	42.3224569466	472.2227192182
127.1557690219	42.3224569466	472.1057582014
127.1557813142	42.3224569466	472.0027079910
127.1557936066	42.3224569466	471.8996577807
127.1558058989	42.3224569466	471.7966075703
127.1558181913	42.3224569466	471.6935573599
127.1558304836	42.3224569466	471.5905071496
127.1558427759	42.3224569466	471.4874569393
127.1558550683	42.3224569466	471.3844040555
127.1558673606	42.3224569466	471.2813494745
127.1547979273	42.3224660142	482.7593987049
127.1548102196	42.3224660142	482.6205071788
127.1548225120	42.3224660142	482.4816140114
127.1548348043	42.3224660142	482.3427183941
127.1548470966	42.3224660142	482.2038227768
127.1548593890	42.3224660142	482.0649271593
127.1548716813	42.3224660142	481.9260315420
127.1548839737	42.3224660142	481.7871359247
127.1548962660	42.3224660142	481.6482403072
127.1549085583	42.3224660142	481.5093455463
127.1549208507	42.3224660142	481.3704519746
127.1549331430	42.3224660142	481.2315584027
127.1549454353	42.3224660142	481.0926648310
127.1549577277	42.3224660142	480.9537712593
127.1549700200	42.3224660142	480.8148776874
127.1549823124	42.3224660142	480.6759841157
127.1549946047	42.3224660142	480.5370886375
127.1550068970	42.3224660142	480.3981906950
127.1550191894	42.3224660142	480.2592927527
127.1550314817	42.3224660142	480.1203948104
127.1550437740	42.3224660142	479.9814968679
127.1550560664	42.3224660142	479.8425989256
127.1550683587	42.3224660142	479.7037009833
127.1550806510	42.3224660142	479.5648050240
127.1550929434	42.3224660142	479.4259114523
127.1551052357	42.3224660142	479.2870178806
127.1551175281	42.3224660142	479.1481243087
127.1551298204	42.3224660142	479.0092307370
127.1551421127	42.3224660142	478.8703371653
127.1551544051	42.3224660142	478.7314435934
127.1551666974	42.3224660142	478.5925490576
127.1551789897	42.3224660142	478.4536534403
127.1551912821	42.3224660142	478.3147578228
127.1552035744	42.3224660142	478.1758622055
127.1552158668	42.3224660142	478.0369665882
127.1552281591	42.3224660142	477.8980709707
127.1552404514	42.3224660142	477.7591753534
127.1552527438	42.3224660142	477.6204505994
127.1552650361	42.3224660142	477.4819045010
127.1552773284	42.3224660142	477.3433584028
127.1552896208	42.3224660142	477.2048123046
127.1553019131	42.3224660142	477.0662662062
127.1553142054	42.3224660142	476.9277201080
127.1553264978	42.3224660142	476.7891740097
127.1553387901	42.3224660142	476.6506279114
127.1553510825	42.3224660142	476.5120818131
127.1553633748	42.3224660142	476.3735357149
127.1553756671	42.3224660142	476.2349896165
127.1553879595	42.3224660142	476.0964435183
127.1554002518	42.3224660142	475.9578974201
127.1554125441	42.3224660142	475.8193513217
127.1554248365	42.3224660142	475.6814029679
127.1554371288	42.3224660142	475.5439977281
127.1554494211	42.3224660142	475.4065924882
127.1554617135	42.3224660142	475.2691872484
127.1554740058	42.3224660142	475.1317820086
127.1554862982	42.3224660142	474.9943767687
127.1554985905	42.3224660142	474.8569715289
127.1555108828	42.3224660142	474.7195673968
127.1555231752	42.3224660142	474.5821642025
127.1555354675	42.3224660142	474.4447610083
127.1555477598	42.3224660142	474.3073578142
127.1555600522	42.3224660142	474.1699546198
127.1555723445	42.3224660142	474.0325514257
127.1555846369	42.3224660142	473.8951482315
127.1555969292	42.3224660142	473.7577450372
127.1556092215	42.3224660142	473.6203418430
127.1556215139	42.3224660142	473.4829386489
127.1556338062	42.3224660142	473.3455354545
127.1556460985	42.3224660142	473.2081322604
127.1556583909	42.3224660142	473.0707290662
127.1556706832	42.3224660142	472.9333258719
127.1556829755	42.3224660142	472.7959251977
127.1556952679	42.3224660142	472.6585263741
127.1557075602	42.3224660142	472.5211275504
127.1557198526	42.3224660142	472.3837287269
127.1557321449	42.3224660142	472.2463299033
127.1557444372	42.3224660142	472.1089310796
127.1557567296	42.3224660142	471.9715322560
127.1557690219	42.3224660142	471.8545712393
127.1557813142	42.3224660142	471.7515210289
127.1557936066	42.3224660142	471.6484708185
127.1558058989	42.3224660142	471.5454206082
127.1558181913	42.3224660142	471.4423703978
127.1558304836	42.3224660142	471.3393201875
127.1558427759	42.3224660142	471.2362699771
127.1558550683	42.3224660142	471.1332170933
127.1558673606	42.3224660142	471.0301625124
127.1547979273	42.3224750818	482.5071116124
127.1548102196	42.3224750818	482.3682205480
127.1548225120	42.3224750818	482.2293274720
127.1548348043	42.3224750818	482.0904313929
127.1548470966	42.3224750818	481.9515353139
127.1548593890	42.3224750818	481.8126392347
127.1548716813	42.3224750818	481.6737431556
127.1548839737	42.3224750818	481.5348470766
127.1548962660	42.3224750818	481.3959509973
127.1549085583	42.3224750818	481.2570559681
127.1549208507	42.3224750818	481.1181623963
127.1549331430	42.3224750818	480.9792688245
127.1549454353	42.3224750818	480.8403752528
127.1549577277	42.3224750818	480.7014816811
127.1549700200	42.3224750818	480.5625881092
127.1549823124	42.3224750818	480.4236945375
127.1549946047	42.3224750818	480.2847990592
127.1550068970	42.3224750818	480.1459011168
127.1550191894	42.3224750818	480.0070031744
127.1550314817	42.3224750818	479.8681052321
127.1550437740	42.3224750818	479.7292072896
127.1550560664	42.3224750818	479.5903093473
127.1550683587	42.3224750818	479.4514114050
127.1550806510	42.3224750818	479.3125154457
127.1550929434	42.3224750818	479.1736218740
127.1551052357	42.3224750818	479.0347283023
127.1551175281	42.3224750818	478.8958347305
127.1551298204	42.3224750818	478.7569411587
127.1551421127	42.3224750818	478.6180475870
127.1551544051	42.3224750818	478.4791540152
127.1551666974	42.3224750818	478.3402592617
127.1551789897	42.3224750818	478.2013631827
127.1551912821	42.3224750818	478.0624671035
127.1552035744	42.3224750818	477.9235710244
127.1552158668	42.3224750818	477.7846749454
127.1552281591	42.3224750818	477.6457788662
127.1552404514	42.3224750818	477.5068827871
127.1552527438	42.3224750818	477.3681966208
127.1552650361	42.3224750818	477.2297299404
127.1552773284	42.3224750818	477.0912632601
127.1552896208	42.3224750818	476.9527965798
127.1553019131	42.3224750818	476.8143298993
127.1553142054	42.3224750818	476.6758632191
127.1553264978	42.3224750818	476.5373965388
127.1553387901	42.3224750818	476.3989298583
127.1553510825	42.3224750818	476.2604631780
127.1553633748	42.3224750818	476.1219964978
127.1553756671	42.3224750818	475.9835298173
127.1553879595	42.3224750818	475.8450631370
127.1554002518	42.3224750818	475.7065964567
127.1554125441	42.3224750818	475.5681297763
127.1554248365	42.3224750818	475.4302189881
127.1554371288	42.3224750818	475.2928132866
127.1554494211	42.3224750818	475.1554075849
127.1554617135	42.3224750818	475.0180018834
127.1554740058	42.3224750818	474.8805961819
127.1554862982	42.3224750818	474.7431904802
127.1554985905	42.3224750818	474.6057847787
127.1555108828	42.3224750818	474.4683804349
127.1555231752	42.3224750818	474.3309772406
127.1555354675	42.3224750818	474.1935740464
127.1555477598	42.3224750818	474.0561708522
127.1555600522	42.3224750818	473.9187676579
127.1555723445	42.3224750818	473.7813644638
127.1555846369	42.3224750818	473.6439612696
127.1555969292	42.3224750818	473.5065580753
127.1556092215	42.3224750818	473.3691548811
127.1556215139	42.3224750818	473.2317516869
127.1556338062	42.3224750818	473.0943484926
127.1556460985	42.3224750818	472.9569452984
127.1556583909	42.3224750818	472.8195421043
127.1556706832	42.3224750818	472.6821389100
127.1556829755	42.3224750818	472.5447382358
127.1556952679	42.3224750818	472.4073394122
127.1557075602	42.3224750818	472.2699405885
127.1557198526	42.3224750818	472.1325417649
127.1557321449	42.3224750818	471.9951429414
127.1557444372	42.3224750818	471.8577441177
127.1557567296	42.3224750818	471.7203452941
127.1557690219	42.3224750818	471.6033842774
127.1557813142	42.3224750818	471.5003340669
127.1557936066	42.3224750818	471.3972838566
127.1558058989	42.3224750818	471.2942336463
127.1558181913	42.3224750818	471.1911834358
127.1558304836	42.3224750818	471.0881332255
127.1558427759	42.3224750818	470.9850830152
127.1558550683	42.3224750818	470.8820301314
127.1558673606	42.3224750818	470.7789755505
127.1547979273	42.3224841493	482.2548245197
127.1548102196	42.3224841493	482.1159339171
127.1548225120	42.3224841493	481.9770409323
127.1548348043	42.3224841493	481.8381443915
127.1548470966	42.3224841493	481.6992478508
127.1548593890	42.3224841493	481.5603513098
127.1548716813	42.3224841493	481.4214547690
127.1548839737	42.3224841493	481.2825582283
127.1548962660	42.3224841493	481.1436616873
127.1549085583	42.3224841493	481.0047663896
127.1549208507	42.3224841493	480.8658728179
127.1549331430	42.3224841493	480.7269792460
127.1549454353	42.3224841493	480.5880856743
127.1549577277	42.3224841493	480.4491921026
127.1549700200	42.3224841493	480.3102985307
127.1549823124	42.3224841493	480.1714049590
127.1549946047	42.3224841493	480.0325094808
127.1550068970	42.3224841493	479.8936115383
127.1550191894	42.3224841493	479.7547135960
127.1550314817	42.3224841493	479.6158156537
127.1550437740	42.3224841493	479.4769177112
127.1550560664	42.3224841493	479.3380197689
127.1550683587	42.3224841493	479.1991218265
127.1550806510	42.3224841493	479.0602258673
127.1550929434	42.3224841493	478.9213322956
127.1551052357	42.3224841493	478.7824387239
127.1551175281	42.3224841493	478.6435451520
127.1551298204	42.3224841493	478.5046515803
127.1551421127	42.3224841493	478.3657580086
127.1551544051	42.3224841493	478.2268644367
127.1551666974	42.3224841493	478.0879694657
127.1551789897	42.3224841493	477.9490729249
127.1551912821	42.3224841493	477.8101763839
127.1552035744	42.3224841493	477.6712798432
127.1552158668	42.3224841493	477.5323833024
127.1552281591	42.3224841493	477.3934867614
127.1552404514	42.3224841493	477.2545902207
127.1552527438	42.3224841493	477.1159426420
127.1552650361	42.3224841493	476.9775553795
127.1552773284	42.3224841493	476.8391681172
127.1552896208	42.3224841493	476.7007808548
127.1553019131	42.3224841493	476.5623935923
127.1553142054	42.3224841493	476.4240063299
127.1553264978	42.3224841493	476.2856190676
127.1553387901	42.3224841493	476.1472318051
127.1553510825	42.3224841493	476.0088445427
127.1553633748	42.3224841493	475.8704572804
127.1553756671	42.3224841493	475.7320700179
127.1553879595	42.3224841493	475.5936827555
127.1554002518	42.3224841493	475.4552954932
127.1554125441	42.3224841493	475.3169082307
127.1554248365	42.3224841493	475.1790350080
127.1554371288	42.3224841493	475.0416288448
127.1554494211	42.3224841493	474.9042226814
127.1554617135	42.3224841493	474.7668165182
127.1554740058	42.3224841493	474.6294103549
127.1554862982	42.3224841493	474.4920041915
127.1554985905	42.3224841493	474.3545980283
127.1555108828	42.3224841493	474.2171934728
127.1555231752	42.3224841493	474.0797902785
127.1555354675	42.3224841493	473.9423870843
127.1555477598	42.3224841493	473.8049838901
127.1555600522	42.3224841493	473.6675806958
127.1555723445	42.3224841493	473.5301775016
127.1555846369	42.3224841493	473.3927743075
127.1555969292	42.3224841493	473.2553711131
127.1556092215	42.3224841493	473.1179679190
127.1556215139	42.3224841493	472.9805647248
127.1556338062	42.3224841493	472.8431615305
127.1556460985	42.3224841493	472.7057583363
127.1556583909	42.3224841493	472.5683551422
127.1556706832	42.3224841493	472.4309519478
127.1556829755	42.3224841493	472.2935512737
127.1556952679	42.3224841493	472.1561524501
127.1557075602	42.3224841493	472.0187536264
127.1557198526	42.3224841493	471.8813548028
127.1557321449	42.3224841493	471.7439559793
127.1557444372	42.3224841493	471.6065571556
127.1557567296	42.3224841493	471.4691583320
127.1557690219	42.3224841493	471.3521973152
127.1557813142	42.3224841493	471.2491471048
127.1557936066	42.3224841493	471.1460968945
127.1558058989	42.3224841493	471.0430466842
127.1558181913	42.3224841493	470.9399964737
127.1558304836	42.3224841493	470.8369462634
127.1558427759	42.3224841493	470.7338960531
127.1558550683	42.3224841493	470.6308431693
127.1558673606	42.3224841493	470.5277885884
127.1547979273	42.3224932169	482.0025374270
127.1548102196	42.3224932169	481.8636472861
127.1548225120	42.3224932169	481.7247543927
127.1548348043	42.3224932169	481.5858573902
127.1548470966	42.3224932169	481.4469603876
127.1548593890	42.3224932169	481.3080633850
127.1548716813	42.3224932169	481.1691663825
127.1548839737	42.3224932169	481.0302693800
127.1548962660	42.3224932169	480.8913723773
127.1549085583	42.3224932169	480.7524768112
127.1549208507	42.3224932169	480.6135832394
127.1549331430	42.3224932169	480.4746896676
127.1549454353	42.3224932169	480.3357960959
127.1549577277	42.3224932169	480.1969025242
127.1549700200	42.3224932169	480.0580089523
127.1549823124	42.3224932169	479.9191153806
127.1549946047	42.3224932169	479.7802199023
127.1550068970	42.3224932169	479.6413219598
127.1550191894	42.3224932169	479.5024240175
127.1550314817	42.3224932169	479.3635260752
127.1550437740	42.3224932169	479.2246281327
127.1550560664	42.3224932169	479.0857301904
127.1550683587	42.3224932169	478.9468322481
127.1550806510	42.3224932169	478.8079362888
127.1550929434	42.3224932169	478.6690427171
127.1551052357	42.3224932169	478.5301491454
127.1551175281	42.3224932169	478.3912555735
127.1551298204	42.3224932169	478.2523620018
127.1551421127	42.3224932169	478.1134684301
127.1551544051	42.3224932169	477.9745748583
127.1551666974	42.3224932169	477.8356796696
127.1551789897	42.3224932169	477.6967826671
127.1551912821	42.3224932169	477.5578856644
127.1552035744	42.3224932169	477.4189886619
127.1552158668	42.3224932169	477.2800916594
127.1552281591	42.3224932169	477.1411946567
127.1552404514	42.3224932169	477.0022976542
127.1552527438	42.3224932169	476.8636886632
127.1552650361	42.3224932169	476.7253808186
127.1552773284	42.3224932169	476.5870729742
127.1552896208	42.3224932169	476.4487651298
127.1553019131	42.3224932169	476.3104572853
127.1553142054	42.3224932169	476.1721494408
127.1553264978	42.3224932169	476.0338415964
127.1553387901	42.3224932169	475.8955337519
127.1553510825	42.3224932169	475.7572259075
127.1553633748	42.3224932169	475.6189180631
127.1553756671	42.3224932169	475.4806102185
127.1553879595	42.3224932169	475.3423023741
127.1554002518	42.3224932169	475.2039945297
127.1554125441	42.3224932169	475.0656866851
127.1554248365	42.3224932169	474.9278510280
127.1554371288	42.3224932169	474.7904444031
127.1554494211	42.3224932169	474.6530377779
127.1554617135	42.3224932169	474.5156311530
127.1554740058	42.3224932169	474.3782245280
127.1554862982	42.3224932169	474.2408179029
127.1554985905	42.3224932169	474.1034112779
127.1555108828	42.3224932169	473.9660065107
127.1555231752	42.3224932169	473.8286033163
127.1555354675	42.3224932169	473.6912001222
127.1555477598	42.3224932169	473.5537969280
127.1555600522	42.3224932169	473.4163937337
127.1555723445	42.3224932169	473.2789905395
127.1555846369	42.3224932169	473.1415873453
127.1555969292	42.3224932169	473.0041841510
127.1556092215	42.3224932169	472.8667809569
127.1556215139	42.3224932169	472.7293777627
127.1556338062	42.3224932169	472.5919745684
127.1556460985	42.3224932169	472.4545713742
127.1556583909	42.3224932169	472.3171681800
127.1556706832	42.3224932169	472.1797649857
127.1556829755	42.3224932169	472.0423643115
127.1556952679	42.3224932169	471.9049654880
127.1557075602	42.3224932169	471.7675666643
127.1557198526	42.3224932169	471.6301678407
127.1557321449	42.3224932169	471.4927690171
127.1557444372	42.3224932169	471.3553701934
127.1557567296	42.3224932169	471.2179713699
127.1557690219	42.3224932169	471.1010103531
127.1557813142	42.3224932169	470.9979601427
127.1557936066	42.3224932169	470.8949099324
127.1558058989	42.3224932169	470.7918597220
127.1558181913	42.3224932169	470.6888095116
127.1558304836	42.3224932169	470.5857593013
127.1558427759	42.3224932169	470.4827090910
127.1558550683	42.3224932169	470.3796562072
127.1558673606	42.3224932169	470.2766016262
127.1547979273	42.3225022845	481.7502503343
127.1548102196	42.3225022845	481.6113606552
127.1548225120	42.3225022845	481.4724678530
127.1548348043	42.3225022845	481.3335703888
127.1548470966	42.3225022845	481.1946729245
127.1548593890	42.3225022845	481.0557754601
127.1548716813	42.3225022845	480.9168779959
127.1548839737	42.3225022845	480.7779805316
127.1548962660	42.3225022845	480.6390830672
127.1549085583	42.3225022845	480.5001872327
127.1549208507	42.3225022845	480.3612936610
127.1549331430	42.3225022845	480.2224000891
127.1549454353	42.3225022845	480.0835065174
127.1549577277	42.3225022845	479.9446129457
127.1549700200	42.3225022845	479.8057193738
127.1549823124	42.3225022845	479.6668258021
127.1549946047	42.3225022845	479.5279303239
127.1550068970	42.3225022845	479.3890323814
127.1550191894	42.3225022845	479.2501344391
127.1550314817	42.3225022845	479.1112364968
127.1550437740	42.3225022845	478.9723385543
127.1550560664	42.3225022845	478.8334406120
127.1550683587	42.3225022845	478.6945426696
127.1550806510	42.3225022845	478.5556467104
127.1550929434	42.3225022845	478.4167531387
127.1551052357	42.3225022845	478.2778595670
127.1551175281	42.3225022845	478.1389659951
127.1551298204	42.3225022845	478.0000724234
127.1551421127	42.3225022845	477.8611788517
127.1551544051	42.3225022845	477.7222852798
127.1551666974	42.3225022845	477.5833898735
127.1551789897	42.3225022845	477.4444924093
127.1551912821	42.3225022845	477.3055949449
127.1552035744	42.3225022845	477.1666974806
127.1552158668	42.3225022845	477.0278000164
127.1552281591	42.3225022845	476.8889025520
127.1552404514	42.3225022845	476.7500050877
127.1552527438	42.3225022845	476.6114346844
127.1552650361	42.3225022845	476.4732062578
127.1552773284	42.3225022845	476.3349778313
127.1552896208	42.3225022845	476.1967494048
127.1553019131	42.3225022845	476.0585209782
127.1553142054	42.3225022845	475.9202925517
127.1553264978	42.3225022845	475.7820641253
127.1553387901	42.3225022845	475.6438356986
127.1553510825	42.3225022845	475.5056072722
127.1553633748	42.3225022845	475.3673788457
127.1553756671	42.3225022845	475.2291504191
127.1553879595	42.3225022845	475.0909219926
127.1554002518	42.3225022845	474.9526935661
127.1554125441	42.3225022845	474.8144651395
127.1554248365	42.3225022845	474.6766670480
127.1554371288	42.3225022845	474.5392599613
127.1554494211	42.3225022845	474.4018528744
127.1554617135	42.3225022845	474.2644457877
127.1554740058	42.3225022845	474.1270387010
127.1554862982	42.3225022845	473.9896316142
127.1554985905	42.3225022845	473.8522245275
127.1555108828	42.3225022845	473.7148195485
127.1555231752	42.3225022845	473.5774163542
127.1555354675	42.3225022845	473.4400131601
127.1555477598	42.3225022845	473.3026099659
127.1555600522	42.3225022845	473.1652067716
127.1555723445	42.3225022845	473.0278035774
127.1555846369	42.3225022845	472.8904003832
127.1555969292	42.3225022845	472.7529971889
127.1556092215	42.3225022845	472.6155939947
127.1556215139	42.3225022845	472.4781908006
127.1556338062	42.3225022845	472.3407876062
127.1556460985	42.3225022845	472.2033844121
127.1556583909	42.3225022845	472.0659812179
127.1556706832	42.3225022845	471.9285780236
127.1556829755	42.3225022845	471.7911773494
127.1556952679	42.3225022845	471.6537785259
127.1557075602	42.3225022845	471.5163797021
127.1557198526	42.3225022845	471.3789808786
127.1557321449	42.3225022845	471.2415820550
127.1557444372	42.3225022845	471.1041832313
127.1557567296	42.3225022845	470.9667844078
127.1557690219	42.3225022845	470.8498233910
127.1557813142	42.3225022845	470.7467731806
127.1557936066	42.3225022845	470.6437229702
127.1558058989	42.3225022845	470.5406727599
127.1558181913	42.3225022845	470.4376225495
127.1558304836	42.3225022845	470.3345723392
127.1558427759	42.3225022845	470.2315221288
127.1558550683	42.3225022845	470.1284692450
127.1558673606	42.3225022845	470.0254146641
127.1547979273	42.3225113520	481.4979632417
127.1548102196	42.3225113520	481.3590740242
127.1548225120	42.3225113520	481.2201813134
127.1548348043	42.3225113520	481.0812833874
127.1548470966	42.3225113520	480.9423854614
127.1548593890	42.3225113520	480.8034875353
127.1548716813	42.3225113520	480.6645896093
127.1548839737	42.3225113520	480.5256916833
127.1548962660	42.3225113520	480.3867937572
127.1549085583	42.3225113520	480.2478976542
127.1549208507	42.3225113520	480.1090040825
127.1549331430	42.3225113520	479.9701105107
127.1549454353	42.3225113520	479.8312169390
127.1549577277	42.3225113520	479.6923233672
127.1549700200	42.3225113520	479.5534297954
127.1549823124	42.3225113520	479.4145362237
127.1549946047	42.3225113520	479.2756407454
127.1550068970	42.3225113520	479.1367428029
127.1550191894	42.3225113520	478.9978448606
127.1550314817	42.3225113520	478.8589469183
127.1550437740	42.3225113520	478.7200489758
127.1550560664	42.3225113520	478.5811510335
127.1550683587	42.3225113520	478.4422530912
127.1550806510	42.3225113520	478.3033571319
127.1550929434	42.3225113520	478.1644635602
127.1551052357	42.3225113520	478.0255699885
127.1551175281	42.3225113520	477.8866764166
127.1551298204	42.3225113520	477.7477828449
127.1551421127	42.3225113520	477.6088892732
127.1551544051	42.3225113520	477.4699957013
127.1551666974	42.3225113520	477.3311000774
127.1551789897	42.3225113520	477.1922021515
127.1551912821	42.3225113520	477.0533042253
127.1552035744	42.3225113520	476.9144062994
127.1552158668	42.3225113520	476.7755083734
127.1552281591	42.3225113520	476.6366104472
127.1552404514	42.3225113520	476.4977125213
127.1552527438	42.3225113520	476.3591807056
127.1552650361	42.3225113520	476.2210316969
127.1552773284	42.3225113520	476.0828826884
127.1552896208	42.3225113520	475.9447336798
127.1553019131	42.3225113520	475.8065846712
127.1553142054	42.3225113520	475.6684356626
127.1553264978	42.3225113520	475.5302866541
127.1553387901	42.3225113520	475.3921376454
127.1553510825	42.3225113520	475.2539886369
127.1553633748	42.3225113520	475.1158396284
127.1553756671	42.3225113520	474.9776906197
127.1553879595	42.3225113520	474.8395416111
127.1554002518	42.3225113520	474.7013926026
127.1554125441	42.3225113520	474.5632435939
127.1554248365	42.3225113520	474.4254830680
127.1554371288	42.3225113520	474.2880755196
127.1554494211	42.3225113520	474.1506679710
127.1554617135	42.3225113520	474.0132604225
127.1554740058	42.3225113520	473.8758528741
127.1554862982	42.3225113520	473.7384453255
127.1554985905	42.3225113520	473.6010377771
127.1555108828	42.3225113520	473.4636325864
127.1555231752	42.3225113520	473.3262293921
127.1555354675	42.3225113520	473.1888261979
127.1555477598	42.3225113520	473.0514230038
127.1555600522	42.3225113520	472.9140198094
127.1555723445	42.3225113520	472.7766166153
127.1555846369	42.3225113520	472.6392134211
127.1555969292	42.3225113520	472.5018102268
127.1556092215	42.3225113520	472.3644070326
127.1556215139	42.3225113520	472.2270038384
127.1556338062	42.3225113520	472.0896006441
127.1556460985	42.3225113520	471.9521974500
127.1556583909	42.3225113520	471.8147942558
127.1556706832	42.3225113520	471.6773910615
127.1556829755	42.3225113520	471.5399903873
127.1556952679	42.3225113520	471.4025915637
127.1557075602	42.3225113520	471.2651927400
127.1557198526	42.3225113520	471.1277939165
127.1557321449	42.3225113520	470.9903950929
127.1557444372	42.3225113520	470.8529962692
127.1557567296	42.3225113520	470.7155974456
127.1557690219	42.3225113520	470.5986364289
127.1557813142	42.3225113520	470.4955862184
127.1557936066	42.3225113520	470.3925360081
127.1558058989	42.3225113520	470.2894857978
127.1558181913	42.3225113520	470.1864355874
127.1558304836	42.3225113520	470.0833853770
127.1558427759	42.3225113520	469.9803351667
127.1558550683	42.3225113520	469.8772822829
127.1558673606	42.3225113520	469.7742277020
127.1547979273	42.3225204196	481.2456744635
127.1548102196	42.3225204196	481.1067848170
127.1548225120	42.3225204196	480.9678920213
127.1548348043	42.3225204196	480.8289945244
127.1548470966	42.3225204196	480.6900970275
127.1548593890	42.3225204196	480.5511995304
127.1548716813	42.3225204196	480.4123020335
127.1548839737	42.3225204196	480.2734045365
127.1548962660	42.3225204196	480.1345070395
127.1549085583	42.3225204196	479.9956109994
127.1549208507	42.3225204196	479.8567169823
127.1549331430	42.3225204196	479.7178229651
127.1549454353	42.3225204196	479.5789289480
127.1549577277	42.3225204196	479.4400349309
127.1549700200	42.3225204196	479.3011409136
127.1549823124	42.3225204196	479.1622468965
127.1549946047	42.3225204196	479.0233511672
127.1550068970	42.3225204196	478.8844532247
127.1550191894	42.3225204196	478.7455552824
127.1550314817	42.3225204196	478.6066573400
127.1550437740	42.3225204196	478.4677593976
127.1550560664	42.3225204196	478.3288614553
127.1550683587	42.3225204196	478.1899635129
127.1550806510	42.3225204196	478.0510673516
127.1550929434	42.3225204196	477.9121733345
127.1551052357	42.3225204196	477.7732793174
127.1551175281	42.3225204196	477.6343853001
127.1551298204	42.3225204196	477.4954912830
127.1551421127	42.3225204196	477.3565972659
127.1551544051	42.3225204196	477.2177032487
127.1551666974	42.3225204196	477.0788075915
127.1551789897	42.3225204196	476.9399100946
127.1551912821	42.3225204196	476.8010125975
127.1552035744	42.3225204196	476.6621151005
127.1552158668	42.3225204196	476.5232176036
127.1552281591	42.3225204196	476.3843201065
127.1552404514	42.3225204196	476.2454226096
127.1552527438	42.3225204196	476.1069296192
127.1552650361	42.3225204196	475.9688595830
127.1552773284	42.3225204196	475.8307895471
127.1552896208	42.3225204196	475.6927195111
127.1553019131	42.3225204196	475.5546494749
127.1553142054	42.3225204196	475.4165794390
127.1553264978	42.3225204196	475.2785094030
127.1553387901	42.3225204196	475.1404393668
127.1553510825	42.3225204196	475.0023693309
127.1553633748	42.3225204196	474.8642992949
127.1553756671	42.3225204196	474.7262292587
127.1553879595	42.3225204196	474.5881592228
127.1554002518	42.3225204196	474.4500891868
127.1554125441	42.3225204196	474.3120191507
127.1554248365	42.3225204196	474.1742962116
127.1554371288	42.3225204196	474.0368886468
127.1554494211	42.3225204196	473.8994810819
127.1554617135	42.3225204196	473.7620735171
127.1554740058	42.3225204196	473.6246659524
127.1554862982	42.3225204196	473.4872583874
127.1554985905	42.3225204196	473.3498508226
127.1555108828	42.3225204196	473.2124456245
127.1555231752	42.3225204196	473.0750424302
127.1555354675	42.3225204196	472.9376392360
127.1555477598	42.3225204196	472.8002360418
127.1555600522	42.3225204196	472.6628328475
[truncated: 7,593 more rows]
