# Supplementary material for: Simulation Study on Coverage Path Planning of Autonomous Tasks in Hilly Farmland Based on Energy Consumption Model
Source: Hindawi journal article supplement (doi:10.1155/2020/4535734), 2020-08-30
Supplement: f1 [file 4535734.f1.zip › 4535734.f1/Algorithm-pathplanning-matlab/2020.04.25/0606/2.csv]

Longitude	Latitude	Elevation
127.1554215021	42.3233002305	0.0000000000
127.1552315826	42.3231706909	0.0000000000
127.1551711477	42.3230315072	0.0000000000
127.1550579278	42.3229733246	0.0000000000
127.1548994593	42.3227437856	0.0000000000
127.1547979273	42.3226881840	0.0000000000
127.1548303346	42.3226269181	0.0000000000
127.1552063254	42.3224074288	0.0000000000
127.1555715504	42.3223209331	0.0000000000
127.1557135815	42.3225487395	0.0000000000
127.1558439023	42.3227326129	0.0000000000
127.1557600064	42.3229133421	0.0000000000
127.1558042533	42.3230520220	0.0000000000
127.1558673606	42.3231305315	0.0000000000
127.1554215021	42.3233002305	0.0000000000
