# Supplementary material for: Simulation Study on Coverage Path Planning of Autonomous Tasks in Hilly Farmland Based on Energy Consumption Model
Source: Hindawi journal article supplement (doi:10.1155/2020/4535734), 2020-08-30
Supplement: f1 [file 4535734.f1.zip › 4535734.f1/Algorithm-pathplanning-matlab/2020.04.25/0707/1.csv]

Longitude	Latitude	Elevation
127.1563639901	42.3221752626	474.9210297405
127.1563764401	42.3221752626	474.8166536127
127.1563888901	42.3221752626	474.7122774849
127.1564013401	42.3221752626	474.6079013571
127.1564137902	42.3221752626	474.5035252294
127.1564262402	42.3221752626	474.3991491015
127.1564386902	42.3221752626	474.2947729738
127.1564511402	42.3221752626	474.1903977535
127.1564635902	42.3221752626	474.0860256958
127.1564760402	42.3221752626	473.9816536382
127.1564884902	42.3221752626	473.8772815806
127.1565009402	42.3221752626	473.7729095230
127.1565133903	42.3221752626	473.6685374654
127.1565258403	42.3221752626	473.5641654077
127.1565382903	42.3221752626	473.4597932328
127.1565507403	42.3221752626	473.3554208188
127.1565631903	42.3221752626	473.2510484046
127.1565756403	42.3221752626	473.1466759905
127.1565880903	42.3221752626	473.0423035764
127.1566005404	42.3221752626	472.9379311622
127.1566129904	42.3221752626	472.8335587481
127.1566254404	42.3221752626	472.7291845639
127.1566378904	42.3221752626	472.6248080795
127.1566503404	42.3221752626	472.5204315952
127.1566627904	42.3221752626	472.4160551110
127.1566752404	42.3221752626	472.3116786266
127.1566876904	42.3221752626	472.2073021424
127.1567001405	42.3221752626	472.1029256580
127.1567125905	42.3221752626	471.9985515681
127.1567250405	42.3221752626	471.8941795105
127.1567374905	42.3221752626	471.7898074528
127.1567499405	42.3221752626	471.6854353953
127.1567623905	42.3221752626	471.5810633377
127.1567748405	42.3221752626	471.4766912800
127.1567872905	42.3221752626	471.3723192224
127.1567997406	42.3221752626	471.2679445319
127.1568121906	42.3221752626	471.1635684041
127.1568246406	42.3221752626	471.0591922763
127.1568370906	42.3221752626	470.9548161486
127.1568495406	42.3221752626	470.8504400207
127.1568619906	42.3221752626	470.7460638930
127.1568744406	42.3221752626	470.6416877652
127.1568868907	42.3221752626	470.5373144332
127.1568993407	42.3221752626	470.4329420191
127.1569117907	42.3221752626	470.3285696049
127.1569242407	42.3221752626	470.2241971908
127.1569366907	42.3221752626	470.1198247767
127.1569491407	42.3221752626	470.0154523625
127.1569615907	42.3221752626	469.9110799484
127.1569740407	42.3221752626	469.8067078405
127.1569864908	42.3221752626	469.7023357828
127.1569989408	42.3221752626	469.5979637253
127.1570113908	42.3221752626	469.4935916677
127.1570238408	42.3221752626	469.3892196100
127.1570362908	42.3221752626	469.2848475524
127.1570487408	42.3221752626	469.1804754948
127.1570611908	42.3221752626	469.0761034371
127.1570736409	42.3221752626	468.9717313796
127.1570860909	42.3221752626	468.8673593220
127.1570985409	42.3221752626	468.7629872643
127.1571109909	42.3221752626	468.6586152067
127.1571234409	42.3221752626	468.5542431490
127.1571358909	42.3221752626	468.4498707781
127.1571483409	42.3221752626	468.3454942939
127.1571607909	42.3221752626	468.2411178095
127.1571732410	42.3221752626	468.1367413253
127.1571856910	42.3221752626	468.0323648410
127.1571981410	42.3221752626	467.9279883566
127.1572105910	42.3221752626	467.8236118724
127.1563639901	42.3221844239	474.6672474839
127.1563764401	42.3221844239	474.5628718287
127.1563888901	42.3221844239	474.4584961733
127.1564013401	42.3221844239	474.3541205180
127.1564137902	42.3221844239	474.2497448628
127.1564262402	42.3221844239	474.1453692074
127.1564386902	42.3221844239	474.0409935521
127.1564511402	42.3221844239	473.9366186990
127.1564635902	42.3221844239	473.8322466413
127.1564760402	42.3221844239	473.7278745837
127.1564884902	42.3221844239	473.6235025260
127.1565009402	42.3221844239	473.5191304685
127.1565133903	42.3221844239	473.4147584109
127.1565258403	42.3221844239	473.3103863532
127.1565382903	42.3221844239	473.2060140229
127.1565507403	42.3221844239	473.1016411364
127.1565631903	42.3221844239	472.9972682497
127.1565756403	42.3221844239	472.8928953631
127.1565880903	42.3221844239	472.7885224765
127.1566005404	42.3221844239	472.6841495898
127.1566129904	42.3221844239	472.5797767033
127.1566254404	42.3221844239	472.4754022520
127.1566378904	42.3221844239	472.3710257676
127.1566503404	42.3221844239	472.2666492834
127.1566627904	42.3221844239	472.1622727991
127.1566752404	42.3221844239	472.0578963148
127.1566876904	42.3221844239	471.9535198305
127.1567001405	42.3221844239	471.8491433462
127.1567125905	42.3221844239	471.7447692563
127.1567250405	42.3221844239	471.6403971987
127.1567374905	42.3221844239	471.5360251410
127.1567499405	42.3221844239	471.4316530834
127.1567623905	42.3221844239	471.3272810258
127.1567748405	42.3221844239	471.2229089681
127.1567872905	42.3221844239	471.1185369106
127.1567997406	42.3221844239	471.0141625257
127.1568121906	42.3221844239	470.9097868704
127.1568246406	42.3221844239	470.8054112151
127.1568370906	42.3221844239	470.7010355598
127.1568495406	42.3221844239	470.5966599045
127.1568619906	42.3221844239	470.4922842492
127.1568744406	42.3221844239	470.3879085939
127.1568868907	42.3221844239	470.2835350230
127.1568993407	42.3221844239	470.1791621364
127.1569117907	42.3221844239	470.0747892497
127.1569242407	42.3221844239	469.9704163631
127.1569366907	42.3221844239	469.8660434766
127.1569491407	42.3221844239	469.7616705899
127.1569615907	42.3221844239	469.6572977033
127.1569740407	42.3221844239	469.5529255287
127.1569864908	42.3221844239	469.4485534710
127.1569989408	42.3221844239	469.3441814134
127.1570113908	42.3221844239	469.2398093558
127.1570238408	42.3221844239	469.1354372981
127.1570362908	42.3221844239	469.0310652406
127.1570487408	42.3221844239	468.9266931830
127.1570611908	42.3221844239	468.8223211253
127.1570736409	42.3221844239	468.7179490677
127.1570860909	42.3221844239	468.6135770101
127.1570985409	42.3221844239	468.5092049524
127.1571109909	42.3221844239	468.4048328949
127.1571234409	42.3221844239	468.3004608372
127.1571358909	42.3221844239	468.1960884663
127.1571483409	42.3221844239	468.0917119820
127.1571607909	42.3221844239	467.9873354977
127.1571732410	42.3221844239	467.8829590134
127.1571856910	42.3221844239	467.7785825292
127.1571981410	42.3221844239	467.6742060448
127.1572105910	42.3221844239	467.5698295605
127.1563639901	42.3221935851	474.4134652272
127.1563764401	42.3221935851	474.3090900444
127.1563888901	42.3221935851	474.2047148615
127.1564013401	42.3221935851	474.1003396787
127.1564137902	42.3221935851	473.9959644959
127.1564262402	42.3221935851	473.8915893131
127.1564386902	42.3221935851	473.7872141303
127.1564511402	42.3221935851	473.6828396443
127.1564635902	42.3221935851	473.5784675866
127.1564760402	42.3221935851	473.4740955290
127.1564884902	42.3221935851	473.3697234713
127.1565009402	42.3221935851	473.2653514138
127.1565133903	42.3221935851	473.1609793562
127.1565258403	42.3221935851	473.0566072985
127.1565382903	42.3221935851	472.9522348128
127.1565507403	42.3221935851	472.8478614537
127.1565631903	42.3221935851	472.7434880946
127.1565756403	42.3221935851	472.6391147355
127.1565880903	42.3221935851	472.5347413765
127.1566005404	42.3221935851	472.4303680173
127.1566129904	42.3221935851	472.3259946582
127.1566254404	42.3221935851	472.2216199400
127.1566378904	42.3221935851	472.1172434556
127.1566503404	42.3221935851	472.0128669714
127.1566627904	42.3221935851	471.9084904871
127.1566752404	42.3221935851	471.8041140027
127.1566876904	42.3221935851	471.6997375185
127.1567001405	42.3221935851	471.5953610341
127.1567125905	42.3221935851	471.4909869442
127.1567250405	42.3221935851	471.3866148866
127.1567374905	42.3221935851	471.2822428289
127.1567499405	42.3221935851	471.1778707714
127.1567623905	42.3221935851	471.0734987138
127.1567748405	42.3221935851	470.9691266561
127.1567872905	42.3221935851	470.8647545985
127.1567997406	42.3221935851	470.7603805193
127.1568121906	42.3221935851	470.6560053364
127.1568246406	42.3221935851	470.5516301537
127.1568370906	42.3221935851	470.4472549709
127.1568495406	42.3221935851	470.3428797880
127.1568619906	42.3221935851	470.2385046052
127.1568744406	42.3221935851	470.1341294225
127.1568868907	42.3221935851	470.0297556125
127.1568993407	42.3221935851	469.9253822535
127.1569117907	42.3221935851	469.8210088943
127.1569242407	42.3221935851	469.7166355353
127.1569366907	42.3221935851	469.6122621762
127.1569491407	42.3221935851	469.5078888170
127.1569615907	42.3221935851	469.4035154580
127.1569740407	42.3221935851	469.2991432167
127.1569864908	42.3221935851	469.1947711590
127.1569989408	42.3221935851	469.0903991014
127.1570113908	42.3221935851	468.9860270438
127.1570238408	42.3221935851	468.8816549861
127.1570362908	42.3221935851	468.7772829285
127.1570487408	42.3221935851	468.6729108709
127.1570611908	42.3221935851	468.5685388133
127.1570736409	42.3221935851	468.4641667557
127.1570860909	42.3221935851	468.3597946981
127.1570985409	42.3221935851	468.2554226404
127.1571109909	42.3221935851	468.1510505828
127.1571234409	42.3221935851	468.0466785251
127.1571358909	42.3221935851	467.9423061542
127.1571483409	42.3221935851	467.8379296700
127.1571607909	42.3221935851	467.7335531856
127.1571732410	42.3221935851	467.6291767014
127.1571856910	42.3221935851	467.5248002171
127.1571981410	42.3221935851	467.4204237328
127.1572105910	42.3221935851	467.3160472485
127.1563639901	42.3222027464	474.1596829706
127.1563764401	42.3222027464	474.0553082603
127.1563888901	42.3222027464	473.9509335499
127.1564013401	42.3222027464	473.8465588396
127.1564137902	42.3222027464	473.7421841293
127.1564262402	42.3222027464	473.6378094189
127.1564386902	42.3222027464	473.5334347086
127.1564511402	42.3222027464	473.4290605898
127.1564635902	42.3222027464	473.3246885321
127.1564760402	42.3222027464	473.2203164745
127.1564884902	42.3222027464	473.1159444168
127.1565009402	42.3222027464	473.0115723593
127.1565133903	42.3222027464	472.9072003017
127.1565258403	42.3222027464	472.8028282440
127.1565382903	42.3222027464	472.6984556029
127.1565507403	42.3222027464	472.5940817713
127.1565631903	42.3222027464	472.4897079397
127.1565756403	42.3222027464	472.3853341081
127.1565880903	42.3222027464	472.2809602766
127.1566005404	42.3222027464	472.1765864449
127.1566129904	42.3222027464	472.0722126134
127.1566254404	42.3222027464	471.9678376281
127.1566378904	42.3222027464	471.8634611438
127.1566503404	42.3222027464	471.7590846595
127.1566627904	42.3222027464	471.6547081753
127.1566752404	42.3222027464	471.5503316909
127.1566876904	42.3222027464	471.4459552066
127.1567001405	42.3222027464	471.3415787223
127.1567125905	42.3222027464	471.2372046324
127.1567250405	42.3222027464	471.1328325748
127.1567374905	42.3222027464	471.0284605171
127.1567499405	42.3222027464	470.9240884595
127.1567623905	42.3222027464	470.8197164019
127.1567748405	42.3222027464	470.7153443443
127.1567872905	42.3222027464	470.6109722867
127.1567997406	42.3222027464	470.5065985131
127.1568121906	42.3222027464	470.4022238027
127.1568246406	42.3222027464	470.2978490924
127.1568370906	42.3222027464	470.1934743822
127.1568495406	42.3222027464	470.0890996717
127.1568619906	42.3222027464	469.9847249615
127.1568744406	42.3222027464	469.8803502512
127.1568868907	42.3222027464	469.7759762023
127.1568993407	42.3222027464	469.6716023708
127.1569117907	42.3222027464	469.5672285391
127.1569242407	42.3222027464	469.4628547076
127.1569366907	42.3222027464	469.3584808760
127.1569491407	42.3222027464	469.2541070444
127.1569615907	42.3222027464	469.1497332128
127.1569740407	42.3222027464	469.0453609048
127.1569864908	42.3222027464	468.9409888471
127.1569989408	42.3222027464	468.8366167895
127.1570113908	42.3222027464	468.7322447320
127.1570238408	42.3222027464	468.6278726743
127.1570362908	42.3222027464	468.5235006167
127.1570487408	42.3222027464	468.4191285591
127.1570611908	42.3222027464	468.3147565014
127.1570736409	42.3222027464	468.2103844438
127.1570860909	42.3222027464	468.1060123863
127.1570985409	42.3222027464	468.0016403286
127.1571109909	42.3222027464	467.8972682710
127.1571234409	42.3222027464	467.7928962133
127.1571358909	42.3222027464	467.6885238424
127.1571483409	42.3222027464	467.5841473581
127.1571607909	42.3222027464	467.4797708738
127.1571732410	42.3222027464	467.3753943895
127.1571856910	42.3222027464	467.2710179053
127.1571981410	42.3222027464	467.1666414209
127.1572105910	42.3222027464	467.0622649367
127.1563639901	42.3222119076	473.9059007138
127.1563764401	42.3222119076	473.8015264760
127.1563888901	42.3222119076	473.6971522381
127.1564013401	42.3222119076	473.5927780003
127.1564137902	42.3222119076	473.4884037625
127.1564262402	42.3222119076	473.3840295246
127.1564386902	42.3222119076	473.2796552868
127.1564511402	42.3222119076	473.1752815351
127.1564635902	42.3222119076	473.0709094774
127.1564760402	42.3222119076	472.9665374198
127.1564884902	42.3222119076	472.8621653621
127.1565009402	42.3222119076	472.7577933046
127.1565133903	42.3222119076	472.6534212470
127.1565258403	42.3222119076	472.5490491893
127.1565382903	42.3222119076	472.4446763927
127.1565507403	42.3222119076	472.3403020887
127.1565631903	42.3222119076	472.2359277846
127.1565756403	42.3222119076	472.1315534805
127.1565880903	42.3222119076	472.0271791765
127.1566005404	42.3222119076	471.9228048724
127.1566129904	42.3222119076	471.8184305683
127.1566254404	42.3222119076	471.7140553161
127.1566378904	42.3222119076	471.6096788317
127.1566503404	42.3222119076	471.5053023475
127.1566627904	42.3222119076	471.4009258632
127.1566752404	42.3222119076	471.2965493788
127.1566876904	42.3222119076	471.1921728946
127.1567001405	42.3222119076	471.0877964102
127.1567125905	42.3222119076	470.9834223203
127.1567250405	42.3222119076	470.8790502628
127.1567374905	42.3222119076	470.7746782051
127.1567499405	42.3222119076	470.6703061475
127.1567623905	42.3222119076	470.5659340899
127.1567748405	42.3222119076	470.4615620322
127.1567872905	42.3222119076	470.3571899746
127.1567997406	42.3222119076	470.2528165067
127.1568121906	42.3222119076	470.1484422688
127.1568246406	42.3222119076	470.0440680310
127.1568370906	42.3222119076	469.9396937932
127.1568495406	42.3222119076	469.8353195553
127.1568619906	42.3222119076	469.7309453175
127.1568744406	42.3222119076	469.6265710797
127.1568868907	42.3222119076	469.5221967919
127.1568993407	42.3222119076	469.4178224879
127.1569117907	42.3222119076	469.3134481837
127.1569242407	42.3222119076	469.2090738797
127.1569366907	42.3222119076	469.1046995757
127.1569491407	42.3222119076	469.0003252715
127.1569615907	42.3222119076	468.8959509675
127.1569740407	42.3222119076	468.7915785928
127.1569864908	42.3222119076	468.6872065351
127.1569989408	42.3222119076	468.5828344775
127.1570113908	42.3222119076	468.4784624199
127.1570238408	42.3222119076	468.3740903622
127.1570362908	42.3222119076	468.2697183046
127.1570487408	42.3222119076	468.1653462471
127.1570611908	42.3222119076	468.0609741894
127.1570736409	42.3222119076	467.9566021318
127.1570860909	42.3222119076	467.8522300742
127.1570985409	42.3222119076	467.7478580165
127.1571109909	42.3222119076	467.6434859589
127.1571234409	42.3222119076	467.5391139012
127.1571358909	42.3222119076	467.4347415304
127.1571483409	42.3222119076	467.3303650461
127.1571607909	42.3222119076	467.2259885617
127.1571732410	42.3222119076	467.1216120775
127.1571856910	42.3222119076	467.0172355932
127.1571981410	42.3222119076	466.9128591089
127.1572105910	42.3222119076	466.8084826246
127.1563639901	42.3222210689	473.6521184573
127.1563764401	42.3222210689	473.5477446920
127.1563888901	42.3222210689	473.4433709265
127.1564013401	42.3222210689	473.3389971612
127.1564137902	42.3222210689	473.2346233959
127.1564262402	42.3222210689	473.1302496305
127.1564386902	42.3222210689	473.0258758651
127.1564511402	42.3222210689	472.9215024806
127.1564635902	42.3222210689	472.8171304229
127.1564760402	42.3222210689	472.7127583653
127.1564884902	42.3222210689	472.6083863076
127.1565009402	42.3222210689	472.5040142500
127.1565133903	42.3222210689	472.3996421925
127.1565258403	42.3222210689	472.2952701348
127.1565382903	42.3222210689	472.1908971828
127.1565507403	42.3222210689	472.0865224063
127.1565631903	42.3222210689	471.9821476297
127.1565756403	42.3222210689	471.8777728532
127.1565880903	42.3222210689	471.7733980766
127.1566005404	42.3222210689	471.6690233000
127.1566129904	42.3222210689	471.5646485235
127.1566254404	42.3222210689	471.4602730042
127.1566378904	42.3222210689	471.3558965199
127.1566503404	42.3222210689	471.2515200356
127.1566627904	42.3222210689	471.1471435514
127.1566752404	42.3222210689	471.0427670670
127.1566876904	42.3222210689	470.9383905828
127.1567001405	42.3222210689	470.8340140984
127.1567125905	42.3222210689	470.7296400085
127.1567250405	42.3222210689	470.6252679509
127.1567374905	42.3222210689	470.5208958932
127.1567499405	42.3222210689	470.4165238356
127.1567623905	42.3222210689	470.3121517781
127.1567748405	42.3222210689	470.2077797204
127.1567872905	42.3222210689	470.1034076628
127.1567997406	42.3222210689	469.9990345005
127.1568121906	42.3222210689	469.8946607351
127.1568246406	42.3222210689	469.7902869698
127.1568370906	42.3222210689	469.6859132045
127.1568495406	42.3222210689	469.5815394390
127.1568619906	42.3222210689	469.4771656737
127.1568744406	42.3222210689	469.3727919084
127.1568868907	42.3222210689	469.2684173817
127.1568993407	42.3222210689	469.1640426052
127.1569117907	42.3222210689	469.0596678285
127.1569242407	42.3222210689	468.9552930520
127.1569366907	42.3222210689	468.8509182755
127.1569491407	42.3222210689	468.7465434989
127.1569615907	42.3222210689	468.6421687224
127.1569740407	42.3222210689	468.5377962809
127.1569864908	42.3222210689	468.4334242232
127.1569989408	42.3222210689	468.3290521657
127.1570113908	42.3222210689	468.2246801081
127.1570238408	42.3222210689	468.1203080504
127.1570362908	42.3222210689	468.0159359928
127.1570487408	42.3222210689	467.9115639352
127.1570611908	42.3222210689	467.8071918775
127.1570736409	42.3222210689	467.7028198199
127.1570860909	42.3222210689	467.5984477624
127.1570985409	42.3222210689	467.4940757047
127.1571109909	42.3222210689	467.3897036471
127.1571234409	42.3222210689	467.2853315894
127.1571358909	42.3222210689	467.1809592185
127.1571483409	42.3222210689	467.0765827343
127.1571607909	42.3222210689	466.9722062499
127.1571732410	42.3222210689	466.8678297656
127.1571856910	42.3222210689	466.7634532814
127.1571981410	42.3222210689	466.6590767970
127.1572105910	42.3222210689	466.5547003128
127.1563639901	42.3222302301	473.3983362005
127.1563764401	42.3222302301	473.2939629077
127.1563888901	42.3222302301	473.1895896147
127.1564013401	42.3222302301	473.0852163219
127.1564137902	42.3222302301	472.9808430291
127.1564262402	42.3222302301	472.8764697361
127.1564386902	42.3222302301	472.7720964433
127.1564511402	42.3222302301	472.6677234259
127.1564635902	42.3222302301	472.5633513682
127.1564760402	42.3222302301	472.4589793106
127.1564884902	42.3222302301	472.3546072529
127.1565009402	42.3222302301	472.2502351953
127.1565133903	42.3222302301	472.1458631378
127.1565258403	42.3222302301	472.0414910801
127.1565382903	42.3222302301	471.9371179727
127.1565507403	42.3222302301	471.8327427237
127.1565631903	42.3222302301	471.7283674746
127.1565756403	42.3222302301	471.6239922256
127.1565880903	42.3222302301	471.5196169766
127.1566005404	42.3222302301	471.4152417274
127.1566129904	42.3222302301	471.3108664784
127.1566254404	42.3222302301	471.2064906922
127.1566378904	42.3222302301	471.1021142078
127.1566503404	42.3222302301	470.9977377236
127.1566627904	42.3222302301	470.8933612393
127.1566752404	42.3222302301	470.7889847550
127.1566876904	42.3222302301	470.6846082707
127.1567001405	42.3222302301	470.5802317863
127.1567125905	42.3222302301	470.4758576965
127.1567250405	42.3222302301	470.3714856389
127.1567374905	42.3222302301	470.2671135812
127.1567499405	42.3222302301	470.1627415236
127.1567623905	42.3222302301	470.0583694660
127.1567748405	42.3222302301	469.9539974083
127.1567872905	42.3222302301	469.8496253508
127.1567997406	42.3222302301	469.7452524941
127.1568121906	42.3222302301	469.6408792012
127.1568246406	42.3222302301	469.5365059084
127.1568370906	42.3222302301	469.4321326155
127.1568495406	42.3222302301	469.3277593226
127.1568619906	42.3222302301	469.2233860298
127.1568744406	42.3222302301	469.1190127369
127.1568868907	42.3222302301	469.0146379713
127.1568993407	42.3222302301	468.9102627223
127.1569117907	42.3222302301	468.8058874732
127.1569242407	42.3222302301	468.7015122242
127.1569366907	42.3222302301	468.5971369752
127.1569491407	42.3222302301	468.4927617260
127.1569615907	42.3222302301	468.3883864770
127.1569740407	42.3222302301	468.2840139689
127.1569864908	42.3222302301	468.1796419112
127.1569989408	42.3222302301	468.0752698536
127.1570113908	42.3222302301	467.9708977960
127.1570238408	42.3222302301	467.8665257383
127.1570362908	42.3222302301	467.7621536808
127.1570487408	42.3222302301	467.6577816232
127.1570611908	42.3222302301	467.5534095655
127.1570736409	42.3222302301	467.4490375079
127.1570860909	42.3222302301	467.3446654503
127.1570985409	42.3222302301	467.2402933926
127.1571109909	42.3222302301	467.1359213351
127.1571234409	42.3222302301	467.0315492774
127.1571358909	42.3222302301	466.9271769065
127.1571483409	42.3222302301	466.8228004222
127.1571607909	42.3222302301	466.7184239379
127.1571732410	42.3222302301	466.6140474536
127.1571856910	42.3222302301	466.5096709694
127.1571981410	42.3222302301	466.4052944850
127.1572105910	42.3222302301	466.3009180007
127.1563639901	42.3222393914	473.1445539439
127.1563764401	42.3222393914	473.0401811236
127.1563888901	42.3222393914	472.9358083031
127.1564013401	42.3222393914	472.8314354828
127.1564137902	42.3222393914	472.7270626625
127.1564262402	42.3222393914	472.6226898420
127.1564386902	42.3222393914	472.5183170217
127.1564511402	42.3222393914	472.4139443714
127.1564635902	42.3222393914	472.3095723137
127.1564760402	42.3222393914	472.2052002561
127.1564884902	42.3222393914	472.1008281984
127.1565009402	42.3222393914	471.9964561408
127.1565133903	42.3222393914	471.8920840833
127.1565258403	42.3222393914	471.7877120256
127.1565382903	42.3222393914	471.6833387628
127.1565507403	42.3222393914	471.5789630413
127.1565631903	42.3222393914	471.4745873197
127.1565756403	42.3222393914	471.3702115982
127.1565880903	42.3222393914	471.2658358767
127.1566005404	42.3222393914	471.1614601551
127.1566129904	42.3222393914	471.0570844336
127.1566254404	42.3222393914	470.9527083804
127.1566378904	42.3222393914	470.8483318960
127.1566503404	42.3222393914	470.7439554117
127.1566627904	42.3222393914	470.6395789275
127.1566752404	42.3222393914	470.5352024431
127.1566876904	42.3222393914	470.4308259589
127.1567001405	42.3222393914	470.3264494745
127.1567125905	42.3222393914	470.2220753846
127.1567250405	42.3222393914	470.1177033270
127.1567374905	42.3222393914	470.0133312693
127.1567499405	42.3222393914	469.9089592118
127.1567623905	42.3222393914	469.8045871542
127.1567748405	42.3222393914	469.7002150965
127.1567872905	42.3222393914	469.5958430389
127.1567997406	42.3222393914	469.4914704879
127.1568121906	42.3222393914	469.3870976675
127.1568246406	42.3222393914	469.2827248471
127.1568370906	42.3222393914	469.1783520268
127.1568495406	42.3222393914	469.0739792063
127.1568619906	42.3222393914	468.9696063860
127.1568744406	42.3222393914	468.8652335656
127.1568868907	42.3222393914	468.7608585611
127.1568993407	42.3222393914	468.6564828396
127.1569117907	42.3222393914	468.5521071180
127.1569242407	42.3222393914	468.4477313965
127.1569366907	42.3222393914	468.3433556750
127.1569491407	42.3222393914	468.2389799534
127.1569615907	42.3222393914	468.1346042319
127.1569740407	42.3222393914	468.0302316571
127.1569864908	42.3222393914	467.9258595994
127.1569989408	42.3222393914	467.8214875418
127.1570113908	42.3222393914	467.7171154842
127.1570238408	42.3222393914	467.6127434265
127.1570362908	42.3222393914	467.5083713689
127.1570487408	42.3222393914	467.4039993113
127.1570611908	42.3222393914	467.2996272536
127.1570736409	42.3222393914	467.1952551961
127.1570860909	42.3222393914	467.0908831385
127.1570985409	42.3222393914	466.9865110808
127.1571109909	42.3222393914	466.8821390232
127.1571234409	42.3222393914	466.7777669655
127.1571358909	42.3222393914	466.6733945946
127.1571483409	42.3222393914	466.5690181104
127.1571607909	42.3222393914	466.4646416260
127.1571732410	42.3222393914	466.3602651418
127.1571856910	42.3222393914	466.2558886575
127.1571981410	42.3222393914	466.1515121731
127.1572105910	42.3222393914	466.0471356889
127.1563639901	42.3222485527	472.8907716874
127.1563764401	42.3222485527	472.7863993395
127.1563888901	42.3222485527	472.6820269915
127.1564013401	42.3222485527	472.5776546437
127.1564137902	42.3222485527	472.4732822958
127.1564262402	42.3222485527	472.3689099479
127.1564386902	42.3222485527	472.2645376000
127.1564511402	42.3222485527	472.1601653169
127.1564635902	42.3222485527	472.0557932592
127.1564760402	42.3222485527	471.9514212016
127.1564884902	42.3222485527	471.8470491439
127.1565009402	42.3222485527	471.7426770863
127.1565133903	42.3222485527	471.6383050288
127.1565258403	42.3222485527	471.5339329711
127.1565382903	42.3222485527	471.4295595528
127.1565507403	42.3222485527	471.3251833589
127.1565631903	42.3222485527	471.2208071648
127.1565756403	42.3222485527	471.1164309708
127.1565880903	42.3222485527	471.0120547768
127.1566005404	42.3222485527	470.9076785827
127.1566129904	42.3222485527	470.8033023887
127.1566254404	42.3222485527	470.6989260685
127.1566378904	42.3222485527	470.5945495842
127.1566503404	42.3222485527	470.4901730999
127.1566627904	42.3222485527	470.3857966157
127.1566752404	42.3222485527	470.2814201313
127.1566876904	42.3222485527	470.1770436470
127.1567001405	42.3222485527	470.0726671627
127.1567125905	42.3222485527	469.9682930728
127.1567250405	42.3222485527	469.8639210152
127.1567374905	42.3222485527	469.7595489575
127.1567499405	42.3222485527	469.6551768999
127.1567623905	42.3222485527	469.5508048423
127.1567748405	42.3222485527	469.4464327846
127.1567872905	42.3222485527	469.3420607271
127.1567997406	42.3222485527	469.2376884817
127.1568121906	42.3222485527	469.1333161337
127.1568246406	42.3222485527	469.0289437859
127.1568370906	42.3222485527	468.9245714380
127.1568495406	42.3222485527	468.8201990901
127.1568619906	42.3222485527	468.7158267422
127.1568744406	42.3222485527	468.6114543944
127.1568868907	42.3222485527	468.5070791509
127.1568993407	42.3222485527	468.4027029569
127.1569117907	42.3222485527	468.2983267628
127.1569242407	42.3222485527	468.1939505688
127.1569366907	42.3222485527	468.0895743748
127.1569491407	42.3222485527	467.9851981807
127.1569615907	42.3222485527	467.8808219868
127.1569740407	42.3222485527	467.7764493452
127.1569864908	42.3222485527	467.6720772875
127.1569989408	42.3222485527	467.5677052299
127.1570113908	42.3222485527	467.4633331724
127.1570238408	42.3222485527	467.3589611147
127.1570362908	42.3222485527	467.2545890571
127.1570487408	42.3222485527	467.1502169995
127.1570611908	42.3222485527	467.0458449418
127.1570736409	42.3222485527	466.9414728842
127.1570860909	42.3222485527	466.8371008266
127.1570985409	42.3222485527	466.7327287689
127.1571109909	42.3222485527	466.6283567114
127.1571234409	42.3222485527	466.5239846537
127.1571358909	42.3222485527	466.4196122828
127.1571483409	42.3222485527	466.3152357985
127.1571607909	42.3222485527	466.2108593142
127.1571732410	42.3222485527	466.1064828299
127.1571856910	42.3222485527	466.0021063457
127.1571981410	42.3222485527	465.8977298613
127.1572105910	42.3222485527	465.7933533771
127.1563639901	42.3222577139	472.6369881531
127.1563764401	42.3222577139	472.5326160955
127.1563888901	42.3222577139	472.4282440378
127.1564013401	42.3222577139	472.3238719803
127.1564137902	42.3222577139	472.2194999227
127.1564262402	42.3222577139	472.1151278650
127.1564386902	42.3222577139	472.0107558074
127.1564511402	42.3222577139	471.9063837498
127.1564635902	42.3222577139	471.8020116921
127.1564760402	42.3222577139	471.6976396345
127.1564884902	42.3222577139	471.5932675768
127.1565009402	42.3222577139	471.4888955193
127.1565133903	42.3222577139	471.3845234617
127.1565258403	42.3222577139	471.2801514040
127.1565382903	42.3222577139	471.1757779502
127.1565507403	42.3222577139	471.0714016482
127.1565631903	42.3222577139	470.9670253460
127.1565756403	42.3222577139	470.8626490440
127.1565880903	42.3222577139	470.7582727420
127.1566005404	42.3222577139	470.6538964398
127.1566129904	42.3222577139	470.5495201378
127.1566254404	42.3222577139	470.4451437565
127.1566378904	42.3222577139	470.3407672721
127.1566503404	42.3222577139	470.2363907879
127.1566627904	42.3222577139	470.1320143036
127.1566752404	42.3222577139	470.0276378192
127.1566876904	42.3222577139	469.9232613350
127.1567001405	42.3222577139	469.8188848506
127.1567125905	42.3222577139	469.7145106622
127.1567250405	42.3222577139	469.6101384224
127.1567374905	42.3222577139	469.5057661825
127.1567499405	42.3222577139	469.4013939427
127.1567623905	42.3222577139	469.2970217029
127.1567748405	42.3222577139	469.1926494630
127.1567872905	42.3222577139	469.0882772232
127.1567997406	42.3222577139	468.9839051013
127.1568121906	42.3222577139	468.8795330436
127.1568246406	42.3222577139	468.7751609860
127.1568370906	42.3222577139	468.6707889284
127.1568495406	42.3222577139	468.5664168707
127.1568619906	42.3222577139	468.4620448131
127.1568744406	42.3222577139	468.3576727556
127.1568868907	42.3222577139	468.2532975024
127.1568993407	42.3222577139	468.1489212004
127.1569117907	42.3222577139	468.0445448982
127.1569242407	42.3222577139	467.9401685962
127.1569366907	42.3222577139	467.8357922942
127.1569491407	42.3222577139	467.7314159920
127.1569615907	42.3222577139	467.6270396900
127.1569740407	42.3222577139	467.5226668767
127.1569864908	42.3222577139	467.4182946368
127.1569989408	42.3222577139	467.3139223970
127.1570113908	42.3222577139	467.2095501572
127.1570238408	42.3222577139	467.1051779173
127.1570362908	42.3222577139	467.0008056775
127.1570487408	42.3222577139	466.8964334377
127.1570611908	42.3222577139	466.7920613736
127.1570736409	42.3222577139	466.6876893160
127.1570860909	42.3222577139	466.5833172584
127.1570985409	42.3222577139	466.4789452007
127.1571109909	42.3222577139	466.3745731431
127.1571234409	42.3222577139	466.2702010855
127.1571358909	42.3222577139	466.1658353303
127.1571483409	42.3222577139	466.0615523214
127.1571607909	42.3222577139	465.9572693124
127.1571732410	42.3222577139	465.8529863035
127.1571856910	42.3222577139	465.7487032946
127.1571981410	42.3222577139	465.6444202856
127.1572105910	42.3222577139	465.5401372767
127.1563639901	42.3222668752	472.3832025839
127.1563764401	42.3222668752	472.2788305264
127.1563888901	42.3222668752	472.1744584687
127.1564013401	42.3222668752	472.0700864111
127.1564137902	42.3222668752	471.9657143535
127.1564262402	42.3222668752	471.8613422958
127.1564386902	42.3222668752	471.7569702382
127.1564511402	42.3222668752	471.6525981806
127.1564635902	42.3222668752	471.5482261229
127.1564760402	42.3222668752	471.4438540654
127.1564884902	42.3222668752	471.3394820077
127.1565009402	42.3222668752	471.2351099501
127.1565133903	42.3222668752	471.1307378925
127.1565258403	42.3222668752	471.0263658348
127.1565382903	42.3222668752	470.9219925365
127.1565507403	42.3222668752	470.8176167069
127.1565631903	42.3222668752	470.7132408773
127.1565756403	42.3222668752	470.6088650477
127.1565880903	42.3222668752	470.5044892182
127.1566005404	42.3222668752	470.4001133885
127.1566129904	42.3222668752	470.2957375589
127.1566254404	42.3222668752	470.1913614446
127.1566378904	42.3222668752	470.0869849603
127.1566503404	42.3222668752	469.9826084760
127.1566627904	42.3222668752	469.8782319918
127.1566752404	42.3222668752	469.7738555074
127.1566876904	42.3222668752	469.6694790232
127.1567001405	42.3222668752	469.5651025388
127.1567125905	42.3222668752	469.4607280948
127.1567250405	42.3222668752	469.3563553825
127.1567374905	42.3222668752	469.2519826701
127.1567499405	42.3222668752	469.1476099578
127.1567623905	42.3222668752	469.0432372455
127.1567748405	42.3222668752	468.9388645331
127.1567872905	42.3222668752	468.8344918209
127.1567997406	42.3222668752	468.7301195321
127.1568121906	42.3222668752	468.6257474744
127.1568246406	42.3222668752	468.5213754168
127.1568370906	42.3222668752	468.4170033592
127.1568495406	42.3222668752	468.3126313015
127.1568619906	42.3222668752	468.2082592440
127.1568744406	42.3222668752	468.1038871864
127.1568868907	42.3222668752	467.9995122890
127.1568993407	42.3222668752	467.8951364594
127.1569117907	42.3222668752	467.7907606297
127.1569242407	42.3222668752	467.6863848002
127.1569366907	42.3222668752	467.5820089706
127.1569491407	42.3222668752	467.4776331410
127.1569615907	42.3222668752	467.3732573114
127.1569740407	42.3222668752	467.2688841591
127.1569864908	42.3222668752	467.1645114467
127.1569989408	42.3222668752	467.0601387344
127.1570113908	42.3222668752	466.9557660221
127.1570238408	42.3222668752	466.8513933097
127.1570362908	42.3222668752	466.7470205974
127.1570487408	42.3222668752	466.6426478851
127.1570611908	42.3222668752	466.5382758044
127.1570736409	42.3222668752	466.4339037468
127.1570860909	42.3222668752	466.3295316892
127.1570985409	42.3222668752	466.2251596316
127.1571109909	42.3222668752	466.1207875740
127.1571234409	42.3222668752	466.0164155163
127.1571358909	42.3222668752	465.9120669161
127.1571483409	42.3222668752	465.8080262930
127.1571607909	42.3222668752	465.7039856698
127.1571732410	42.3222668752	465.5999450467
127.1571856910	42.3222668752	465.4959044235
127.1571981410	42.3222668752	465.3918638003
127.1572105910	42.3222668752	465.2878231772
127.1563639901	42.3222760364	472.1294170146
127.1563764401	42.3222760364	472.0250449570
127.1563888901	42.3222760364	471.9206728993
127.1564013401	42.3222760364	471.8163008417
127.1564137902	42.3222760364	471.7119287841
127.1564262402	42.3222760364	471.6075567264
127.1564386902	42.3222760364	471.5031846688
127.1564511402	42.3222760364	471.3988126113
127.1564635902	42.3222760364	471.2944405536
127.1564760402	42.3222760364	471.1900684960
127.1564884902	42.3222760364	471.0856964383
127.1565009402	42.3222760364	470.9813243807
127.1565133903	42.3222760364	470.8769523231
127.1565258403	42.3222760364	470.7725802654
127.1565382903	42.3222760364	470.6682071225
127.1565507403	42.3222760364	470.5638317655
127.1565631903	42.3222760364	470.4594564083
127.1565756403	42.3222760364	470.3550810512
127.1565880903	42.3222760364	470.2507056941
127.1566005404	42.3222760364	470.1463303370
127.1566129904	42.3222760364	470.0419549799
127.1566254404	42.3222760364	469.9375791326
127.1566378904	42.3222760364	469.8332026482
127.1566503404	42.3222760364	469.7288261640
127.1566627904	42.3222760364	469.6244496797
127.1566752404	42.3222760364	469.5200731954
127.1566876904	42.3222760364	469.4156967111
127.1567001405	42.3222760364	469.3113202267
127.1567125905	42.3222760364	469.2069455272
127.1567250405	42.3222760364	469.1025723424
127.1567374905	42.3222760364	468.9981991575
127.1567499405	42.3222760364	468.8938259728
127.1567623905	42.3222760364	468.7894527880
127.1567748405	42.3222760364	468.6850796031
127.1567872905	42.3222760364	468.5807064183
127.1567997406	42.3222760364	468.4763339627
127.1568121906	42.3222760364	468.3719619050
127.1568246406	42.3222760364	468.2675898474
127.1568370906	42.3222760364	468.1632177899
127.1568495406	42.3222760364	468.0588457322
127.1568619906	42.3222760364	467.9544736746
127.1568744406	42.3222760364	467.8501016170
127.1568868907	42.3222760364	467.7457270753
127.1568993407	42.3222760364	467.6413517182
127.1569117907	42.3222760364	467.5369763611
127.1569242407	42.3222760364	467.4326010040
127.1569366907	42.3222760364	467.3282256469
127.1569491407	42.3222760364	467.2238502897
127.1569615907	42.3222760364	467.1194749327
127.1569740407	42.3222760364	467.0151014412
127.1569864908	42.3222760364	466.9107282564
127.1569989408	42.3222760364	466.8063550716
127.1570113908	42.3222760364	466.7019818868
127.1570238408	42.3222760364	466.5976087019
127.1570362908	42.3222760364	466.4932355172
127.1570487408	42.3222760364	466.3888623324
127.1570611908	42.3222760364	466.2844902350
127.1570736409	42.3222760364	466.1801181775
127.1570860909	42.3222760364	466.0757461199
127.1570985409	42.3222760364	465.9713740622
127.1571109909	42.3222760364	465.8670020046
127.1571234409	42.3222760364	465.7626299469
127.1571358909	42.3222760364	465.6582985017
127.1571483409	42.3222760364	465.5545002644
127.1571607909	42.3222760364	465.4507020269
127.1571732410	42.3222760364	465.3469037896
127.1571856910	42.3222760364	465.2431055523
127.1571981410	42.3222760364	465.1393073148
127.1572105910	42.3222760364	465.0355090775
127.1563639901	42.3222851977	471.8756314454
127.1563764401	42.3222851977	471.7712593878
127.1563888901	42.3222851977	471.6668873301
127.1564013401	42.3222851977	471.5625152725
127.1564137902	42.3222851977	471.4581432149
127.1564262402	42.3222851977	471.3537711572
127.1564386902	42.3222851977	471.2493990997
127.1564511402	42.3222851977	471.1450270421
127.1564635902	42.3222851977	471.0406549844
127.1564760402	42.3222851977	470.9362829268
127.1564884902	42.3222851977	470.8319108691
127.1565009402	42.3222851977	470.7275388115
127.1565133903	42.3222851977	470.6231667540
127.1565258403	42.3222851977	470.5187946963
127.1565382903	42.3222851977	470.4144217088
127.1565507403	42.3222851977	470.3100468242
127.1565631903	42.3222851977	470.2056719395
127.1565756403	42.3222851977	470.1012970549
127.1565880903	42.3222851977	469.9969221703
127.1566005404	42.3222851977	469.8925472856
127.1566129904	42.3222851977	469.7881724011
127.1566254404	42.3222851977	469.6837968208
127.1566378904	42.3222851977	469.5794203364
127.1566503404	42.3222851977	469.4750438521
127.1566627904	42.3222851977	469.3706673679
127.1566752404	42.3222851977	469.2662908835
127.1566876904	42.3222851977	469.1619143993
127.1567001405	42.3222851977	469.0575379149
127.1567125905	42.3222851977	468.9531629598
127.1567250405	42.3222851977	468.8487893025
127.1567374905	42.3222851977	468.7444156451
127.1567499405	42.3222851977	468.6400419879
127.1567623905	42.3222851977	468.5356683306
127.1567748405	42.3222851977	468.4312946733
127.1567872905	42.3222851977	468.3269210160
127.1567997406	42.3222851977	468.2225483935
127.1568121906	42.3222851977	468.1181763358
127.1568246406	42.3222851977	468.0138042783
127.1568370906	42.3222851977	467.9094322207
127.1568495406	42.3222851977	467.8050601630
127.1568619906	42.3222851977	467.7006881054
127.1568744406	42.3222851977	467.5963160478
127.1568868907	42.3222851977	467.4919418618
127.1568993407	42.3222851977	467.3875669773
127.1569117907	42.3222851977	467.2831920926
127.1569242407	42.3222851977	467.1788172080
127.1569366907	42.3222851977	467.0744423234
127.1569491407	42.3222851977	466.9700674387
127.1569615907	42.3222851977	466.8656925541
127.1569740407	42.3222851977	466.7613187236
127.1569864908	42.3222851977	466.6569450662
127.1569989408	42.3222851977	466.5525714090
127.1570113908	42.3222851977	466.4481977517
127.1570238408	42.3222851977	466.3438240944
127.1570362908	42.3222851977	466.2394504371
127.1570487408	42.3222851977	466.1350767799
127.1570611908	42.3222851977	466.0307046659
127.1570736409	42.3222851977	465.9263326083
127.1570860909	42.3222851977	465.8219605507
127.1570985409	42.3222851977	465.7175884930
127.1571109909	42.3222851977	465.6132164354
127.1571234409	42.3222851977	465.5088443777
127.1571358909	42.3222851977	465.4045300875
127.1571483409	42.3222851977	465.3009742359
127.1571607909	42.3222851977	465.1974183843
127.1571732410	42.3222851977	465.0938625328
127.1571856910	42.3222851977	464.9903066812
127.1571981410	42.3222851977	464.8867508296
127.1572105910	42.3222851977	464.7831949780
127.1563639901	42.3222943590	471.6218458762
127.1563764401	42.3222943590	471.5174738186
127.1563888901	42.3222943590	471.4131017609
127.1564013401	42.3222943590	471.3087297033
127.1564137902	42.3222943590	471.2043576458
127.1564262402	42.3222943590	471.0999855881
127.1564386902	42.3222943590	470.9956135305
127.1564511402	42.3222943590	470.8912414729
127.1564635902	42.3222943590	470.7868694152
127.1564760402	42.3222943590	470.6824973576
127.1564884902	42.3222943590	470.5781252999
127.1565009402	42.3222943590	470.4737532424
127.1565133903	42.3222943590	470.3693811848
127.1565258403	42.3222943590	470.2650091271
127.1565382903	42.3222943590	470.1606362950
127.1565507403	42.3222943590	470.0562618829
127.1565631903	42.3222943590	469.9518874707
127.1565756403	42.3222943590	469.8475130586
127.1565880903	42.3222943590	469.7431386465
127.1566005404	42.3222943590	469.6387642343
127.1566129904	42.3222943590	469.5343898222
127.1566254404	42.3222943590	469.4300145089
127.1566378904	42.3222943590	469.3256380245
127.1566503404	42.3222943590	469.2212615403
127.1566627904	42.3222943590	469.1168850560
127.1566752404	42.3222943590	469.0125085717
127.1566876904	42.3222943590	468.9081320874
127.1567001405	42.3222943590	468.8037556031
127.1567125905	42.3222943590	468.6993803924
127.1567250405	42.3222943590	468.5950062626
127.1567374905	42.3222943590	468.4906321328
127.1567499405	42.3222943590	468.3862580030
127.1567623905	42.3222943590	468.2818838733
127.1567748405	42.3222943590	468.1775097434
127.1567872905	42.3222943590	468.0731356137
127.1567997406	42.3222943590	467.9687628244
127.1568121906	42.3222943590	467.8643907667
127.1568246406	42.3222943590	467.7600187091
127.1568370906	42.3222943590	467.6556466515
127.1568495406	42.3222943590	467.5512745938
127.1568619906	42.3222943590	467.4469025362
127.1568744406	42.3222943590	467.3425304786
127.1568868907	42.3222943590	467.2381566484
127.1568993407	42.3222943590	467.1337822363
127.1569117907	42.3222943590	467.0294078241
127.1569242407	42.3222943590	466.9250334120
127.1569366907	42.3222943590	466.8206589999
127.1569491407	42.3222943590	466.7162845877
127.1569615907	42.3222943590	466.6119101756
127.1569740407	42.3222943590	466.5075360060
127.1569864908	42.3222943590	466.4031618761
127.1569989408	42.3222943590	466.2987877464
127.1570113908	42.3222943590	466.1944136167
127.1570238408	42.3222943590	466.0900394868
127.1570362908	42.3222943590	465.9856653571
127.1570487408	42.3222943590	465.8812912273
127.1570611908	42.3222943590	465.7769190967
127.1570736409	42.3222943590	465.6725470391
127.1570860909	42.3222943590	465.5681749815
127.1570985409	42.3222943590	465.4638029238
127.1571109909	42.3222943590	465.3594308662
127.1571234409	42.3222943590	465.2550588085
127.1571358909	42.3222943590	465.1507616732
127.1571483409	42.3222943590	465.0474482075
127.1571607909	42.3222943590	464.9441347416
127.1571732410	42.3222943590	464.8408212759
127.1571856910	42.3222943590	464.7375078101
127.1571981410	42.3222943590	464.6341943443
127.1572105910	42.3222943590	464.5308808785
127.1563639901	42.3223035202	471.3680603068
127.1563764401	42.3223035202	471.2636882492
127.1563888901	42.3223035202	471.1593161915
127.1564013401	42.3223035202	471.0549441340
127.1564137902	42.3223035202	470.9505720764
127.1564262402	42.3223035202	470.8462000187
127.1564386902	42.3223035202	470.7418279611
127.1564511402	42.3223035202	470.6374559035
127.1564635902	42.3223035202	470.5330838458
127.1564760402	42.3223035202	470.4287117883
127.1564884902	42.3223035202	470.3243397306
127.1565009402	42.3223035202	470.2199676730
127.1565133903	42.3223035202	470.1155956154
127.1565258403	42.3223035202	470.0112235577
127.1565382903	42.3223035202	469.9068508810
127.1565507403	42.3223035202	469.8024769414
127.1565631903	42.3223035202	469.6981030017
127.1565756403	42.3223035202	469.5937290621
127.1565880903	42.3223035202	469.4893551225
127.1566005404	42.3223035202	469.3849811828
127.1566129904	42.3223035202	469.2806072432
127.1566254404	42.3223035202	469.1762321969
127.1566378904	42.3223035202	469.0718557125
127.1566503404	42.3223035202	468.9674792283
127.1566627904	42.3223035202	468.8631027440
127.1566752404	42.3223035202	468.7587262596
127.1566876904	42.3223035202	468.6543497754
127.1567001405	42.3223035202	468.5499732910
127.1567125905	42.3223035202	468.4455978247
127.1567250405	42.3223035202	468.3412232225
127.1567374905	42.3223035202	468.2368486202
127.1567499405	42.3223035202	468.1324740179
127.1567623905	42.3223035202	468.0280994157
127.1567748405	42.3223035202	467.9237248134
127.1567872905	42.3223035202	467.8193502112
127.1567997406	42.3223035202	467.7149772550
127.1568121906	42.3223035202	467.6106051973
127.1568246406	42.3223035202	467.5062331397
127.1568370906	42.3223035202	467.4018610821
127.1568495406	42.3223035202	467.2974890244
127.1568619906	42.3223035202	467.1931169669
127.1568744406	42.3223035202	467.0887449093
127.1568868907	42.3223035202	466.9843714347
127.1568993407	42.3223035202	466.8799974951
127.1569117907	42.3223035202	466.7756235554
127.1569242407	42.3223035202	466.6712496158
127.1569366907	42.3223035202	466.5668756762
127.1569491407	42.3223035202	466.4625017364
127.1569615907	42.3223035202	466.3581277968
127.1569740407	42.3223035202	466.2537532882
127.1569864908	42.3223035202	466.1493786858
127.1569989408	42.3223035202	466.0450040836
127.1570113908	42.3223035202	465.9406294814
127.1570238408	42.3223035202	465.8362548790
127.1570362908	42.3223035202	465.7318802768
127.1570487408	42.3223035202	465.6275056746
127.1570611908	42.3223035202	465.5231335273
127.1570736409	42.3223035202	465.4187614697
127.1570860909	42.3223035202	465.3143894121
127.1570985409	42.3223035202	465.2100173544
127.1571109909	42.3223035202	465.1056452969
127.1571234409	42.3223035202	465.0012732392
127.1571358909	42.3223035202	464.8969932588
127.1571483409	42.3223035202	464.7939221789
127.1571607909	42.3223035202	464.6908510988
127.1571732410	42.3223035202	464.5877800188
127.1571856910	42.3223035202	464.4847089389
127.1571981410	42.3223035202	464.3816378588
127.1572105910	42.3223035202	464.2785667789
127.1563639901	42.3223126815	471.1142747376
127.1563764401	42.3223126815	471.0099026801
127.1563888901	42.3223126815	470.9055306224
127.1564013401	42.3223126815	470.8011585648
127.1564137902	42.3223126815	470.6967865072
127.1564262402	42.3223126815	470.5924144495
127.1564386902	42.3223126815	470.4880423919
127.1564511402	42.3223126815	470.3836703344
127.1564635902	42.3223126815	470.2792982767
127.1564760402	42.3223126815	470.1749262191
127.1564884902	42.3223126815	470.0705541614
127.1565009402	42.3223126815	469.9661821038
127.1565133903	42.3223126815	469.8618100462
127.1565258403	42.3223126815	469.7574379885
127.1565382903	42.3223126815	469.6530654673
127.1565507403	42.3223126815	469.5486920002
127.1565631903	42.3223126815	469.4443185329
127.1565756403	42.3223126815	469.3399450658
127.1565880903	42.3223126815	469.2355715987
127.1566005404	42.3223126815	469.1311981315
127.1566129904	42.3223126815	469.0268246644
127.1566254404	42.3223126815	468.9224498850
127.1566378904	42.3223126815	468.8180734007
127.1566503404	42.3223126815	468.7136969164
127.1566627904	42.3223126815	468.6093204322
127.1566752404	42.3223126815	468.5049439478
127.1566876904	42.3223126815	468.4005674635
127.1567001405	42.3223126815	468.2961909792
127.1567125905	42.3223126815	468.1918152573
127.1567250405	42.3223126815	468.0874401826
127.1567374905	42.3223126815	467.9830651078
127.1567499405	42.3223126815	467.8786900331
127.1567623905	42.3223126815	467.7743149584
127.1567748405	42.3223126815	467.6699398835
127.1567872905	42.3223126815	467.5655648088
127.1567997406	42.3223126815	467.4611916858
127.1568121906	42.3223126815	467.3568196281
127.1568246406	42.3223126815	467.2524475705
127.1568370906	42.3223126815	467.1480755129
127.1568495406	42.3223126815	467.0437034553
127.1568619906	42.3223126815	466.9393313977
127.1568744406	42.3223126815	466.8349593401
127.1568868907	42.3223126815	466.7305862212
127.1568993407	42.3223126815	466.6262127541
127.1569117907	42.3223126815	466.5218392869
127.1569242407	42.3223126815	466.4174658198
127.1569366907	42.3223126815	466.3130923527
127.1569491407	42.3223126815	466.2087188854
127.1569615907	42.3223126815	466.1043454183
127.1569740407	42.3223126815	465.9999705705
127.1569864908	42.3223126815	465.8955954957
127.1569989408	42.3223126815	465.7912204210
127.1570113908	42.3223126815	465.6868453463
127.1570238408	42.3223126815	465.5824702715
127.1570362908	42.3223126815	465.4780951967
127.1570487408	42.3223126815	465.3737201220
127.1570611908	42.3223126815	465.2693479581
127.1570736409	42.3223126815	465.1649759005
127.1570860909	42.3223126815	465.0606038430
127.1570985409	42.3223126815	464.9562317853
127.1571109909	42.3223126815	464.8518597277
127.1571234409	42.3223126815	464.7474876700
127.1571358909	42.3223126815	464.6432248446
127.1571483409	42.3223126815	464.5403961504
127.1571607909	42.3223126815	464.4375674562
127.1571732410	42.3223126815	464.3347387620
127.1571856910	42.3223126815	464.2319100678
127.1571981410	42.3223126815	464.1290813735
127.1572105910	42.3223126815	464.0262526794
127.1563639901	42.3223218427	470.8604891683
127.1563764401	42.3223218427	470.7561171107
127.1563888901	42.3223218427	470.6517450530
127.1564013401	42.3223218427	470.5473729954
127.1564137902	42.3223218427	470.4430009378
127.1564262402	42.3223218427	470.3386288801
127.1564386902	42.3223218427	470.2342568226
127.1564511402	42.3223218427	470.1298847650
127.1564635902	42.3223218427	470.0255127073
127.1564760402	42.3223218427	469.9211406497
127.1564884902	42.3223218427	469.8167685920
127.1565009402	42.3223218427	469.7123965344
127.1565133903	42.3223218427	469.6080244769
127.1565258403	42.3223218427	469.5036524192
127.1565382903	42.3223218427	469.3992800533
127.1565507403	42.3223218427	469.2949070587
127.1565631903	42.3223218427	469.1905340640
127.1565756403	42.3223218427	469.0861610693
127.1565880903	42.3223218427	468.9817880747
127.1566005404	42.3223218427	468.8774150800
127.1566129904	42.3223218427	468.7730420853
127.1566254404	42.3223218427	468.6686675730
127.1566378904	42.3223218427	468.5642910886
127.1566503404	42.3223218427	468.4599146044
127.1566627904	42.3223218427	468.3555381201
127.1566752404	42.3223218427	468.2511616358
127.1566876904	42.3223218427	468.1467851515
127.1567001405	42.3223218427	468.0424086671
127.1567125905	42.3223218427	467.9380326897
127.1567250405	42.3223218427	467.8336571425
127.1567374905	42.3223218427	467.7292815952
127.1567499405	42.3223218427	467.6249060480
127.1567623905	42.3223218427	467.5205305008
127.1567748405	42.3223218427	467.4161549535
127.1567872905	42.3223218427	467.3117794063
127.1567997406	42.3223218427	467.2074061164
127.1568121906	42.3223218427	467.1030340587
127.1568246406	42.3223218427	466.9986620012
127.1568370906	42.3223218427	466.8942899436
127.1568495406	42.3223218427	466.7899178859
127.1568619906	42.3223218427	466.6855458283
127.1568744406	42.3223218427	466.5811737707
127.1568868907	42.3223218427	466.4768010076
127.1568993407	42.3223218427	466.3724280129
127.1569117907	42.3223218427	466.2680550182
127.1569242407	42.3223218427	466.1636820236
127.1569366907	42.3223218427	466.0593090289
127.1569491407	42.3223218427	465.9549360342
127.1569615907	42.3223218427	465.8505630396
127.1569740407	42.3223218427	465.7461878527
127.1569864908	42.3223218427	465.6418123054
127.1569989408	42.3223218427	465.5374367582
127.1570113908	42.3223218427	465.4330612110
127.1570238408	42.3223218427	465.3286856637
127.1570362908	42.3223218427	465.2243101165
127.1570487408	42.3223218427	465.1199345693
127.1570611908	42.3223218427	465.0155623887
127.1570736409	42.3223218427	464.9111903312
127.1570860909	42.3223218427	464.8068182736
127.1570985409	42.3223218427	464.7024462159
127.1571109909	42.3223218427	464.5980741583
127.1571234409	42.3223218427	464.4937021006
127.1571358909	42.3223218427	464.3894564302
127.1571483409	42.3223218427	464.2868701218
127.1571607909	42.3223218427	464.1842838133
127.1571732410	42.3223218427	464.0816975049
127.1571856910	42.3223218427	463.9791111966
127.1571981410	42.3223218427	463.8765248881
127.1572105910	42.3223218427	463.7739385797
127.1563639901	42.3223310040	470.6067035991
127.1563764401	42.3223310040	470.5023315415
127.1563888901	42.3223310040	470.3979594838
127.1564013401	42.3223310040	470.2935874262
127.1564137902	42.3223310040	470.1892153687
127.1564262402	42.3223310040	470.0848433110
127.1564386902	42.3223310040	469.9804712534
127.1564511402	42.3223310040	469.8760991958
127.1564635902	42.3223310040	469.7717271381
127.1564760402	42.3223310040	469.6673550805
127.1564884902	42.3223310040	469.5629830228
127.1565009402	42.3223310040	469.4586109653
127.1565133903	42.3223310040	469.3542389077
127.1565258403	42.3223310040	469.2498668500
127.1565382903	42.3223310040	469.1454946396
127.1565507403	42.3223310040	469.0411221174
127.1565631903	42.3223310040	468.9367495952
127.1565756403	42.3223310040	468.8323770730
127.1565880903	42.3223310040	468.7280045509
127.1566005404	42.3223310040	468.6236320286
127.1566129904	42.3223310040	468.5192595065
127.1566254404	42.3223310040	468.4148852612
127.1566378904	42.3223310040	468.3105087768
127.1566503404	42.3223310040	468.2061322925
127.1566627904	42.3223310040	468.1017558083
127.1566752404	42.3223310040	467.9973793239
127.1566876904	42.3223310040	467.8930028397
127.1567001405	42.3223310040	467.7886263553
127.1567125905	42.3223310040	467.6842501223
127.1567250405	42.3223310040	467.5798741026
127.1567374905	42.3223310040	467.4754980828
127.1567499405	42.3223310040	467.3711220631
127.1567623905	42.3223310040	467.2667460435
127.1567748405	42.3223310040	467.1623700237
127.1567872905	42.3223310040	467.0579940040
127.1567997406	42.3223310040	466.9536205473
127.1568121906	42.3223310040	466.8492484896
127.1568246406	42.3223310040	466.7448764320
127.1568370906	42.3223310040	466.6405043744
127.1568495406	42.3223310040	466.5361323167
127.1568619906	42.3223310040	466.4317602591
127.1568744406	42.3223310040	466.3273882015
127.1568868907	42.3223310040	466.2230157941
127.1568993407	42.3223310040	466.1186432720
127.1569117907	42.3223310040	466.0142707497
127.1569242407	42.3223310040	465.9098982276
127.1569366907	42.3223310040	465.8055257054
127.1569491407	42.3223310040	465.7011531832
127.1569615907	42.3223310040	465.5967806610
127.1569740407	42.3223310040	465.4924051351
127.1569864908	42.3223310040	465.3880291153
127.1569989408	42.3223310040	465.2836530956
127.1570113908	42.3223310040	465.1792770759
127.1570238408	42.3223310040	465.0749010561
127.1570362908	42.3223310040	464.9705250364
127.1570487408	42.3223310040	464.8661490167
127.1570611908	42.3223310040	464.7617768196
127.1570736409	42.3223310040	464.6574047620
127.1570860909	42.3223310040	464.5530327044
127.1570985409	42.3223310040	464.4486606467
127.1571109909	42.3223310040	464.3442885891
127.1571234409	42.3223310040	464.2399165314
127.1571358909	42.3223310040	464.1356880160
127.1571483409	42.3223310040	464.0333440934
127.1571607909	42.3223310040	463.9310001707
127.1571732410	42.3223310040	463.8286562481
127.1571856910	42.3223310040	463.7263123255
127.1571981410	42.3223310040	463.6239684028
127.1572105910	42.3223310040	463.5216244802
127.1563639901	42.3223401652	470.3529180843
127.1563764401	42.3223401652	470.2485460268
127.1563888901	42.3223401652	470.1441739691
127.1564013401	42.3223401652	470.0398019115
127.1564137902	42.3223401652	469.9354298539
127.1564262402	42.3223401652	469.8310577962
127.1564386902	42.3223401652	469.7266857386
127.1564511402	42.3223401652	469.6223136793
127.1564635902	42.3223401652	469.5179416137
127.1564760402	42.3223401652	469.4135695482
127.1564884902	42.3223401652	469.3091974825
127.1565009402	42.3223401652	469.2048254170
127.1565133903	42.3223401652	469.1004533515
127.1565258403	42.3223401652	468.9960812859
127.1565382903	42.3223401652	468.8917092230
127.1565507403	42.3223401652	468.7873371654
127.1565631903	42.3223401652	468.6829651077
127.1565756403	42.3223401652	468.5785930502
127.1565880903	42.3223401652	468.4742209926
127.1566005404	42.3223401652	468.3698489349
127.1566129904	42.3223401652	468.2654768773
127.1566254404	42.3223401652	468.1611028979
127.1566378904	42.3223401652	468.0567264215
127.1566503404	42.3223401652	467.9523499452
127.1566627904	42.3223401652	467.8479734688
127.1566752404	42.3223401652	467.7435969924
127.1566876904	42.3223401652	467.6392205161
127.1567001405	42.3223401652	467.5348440396
127.1567125905	42.3223401652	467.4304675590
127.1567250405	42.3223401652	467.3260910748
127.1567374905	42.3223401652	467.2217145904
127.1567499405	42.3223401652	467.1173381061
127.1567623905	42.3223401652	467.0129616219
127.1567748405	42.3223401652	466.9085851375
127.1567872905	42.3223401652	466.8042086533
127.1567997406	42.3223401652	466.6998350274
127.1568121906	42.3223401652	466.5954629618
127.1568246406	42.3223401652	466.4910908963
127.1568370906	42.3223401652	466.3867188308
127.1568495406	42.3223401652	466.2823467651
127.1568619906	42.3223401652	466.1779746996
127.1568744406	42.3223401652	466.0736026341
127.1568868907	42.3223401652	465.9692305745
127.1568993407	42.3223401652	465.8648585169
127.1569117907	42.3223401652	465.7604864592
127.1569242407	42.3223401652	465.6561144016
127.1569366907	42.3223401652	465.5517423440
127.1569491407	42.3223401652	465.4473702863
127.1569615907	42.3223401652	465.3429982288
127.1569740407	42.3223401652	465.2386223763
127.1569864908	42.3223401652	465.1342458998
127.1569989408	42.3223401652	465.0298694235
127.1570113908	42.3223401652	464.9254929472
127.1570238408	42.3223401652	464.8211164707
127.1570362908	42.3223401652	464.7167399944
127.1570487408	42.3223401652	464.6123635181
127.1570611908	42.3223401652	464.5079912972
127.1570736409	42.3223401652	464.4036192317
127.1570860909	42.3223401652	464.2992471662
127.1570985409	42.3223401652	464.1948751005
127.1571109909	42.3223401652	464.0905030350
127.1571234409	42.3223401652	463.9861309694
127.1571358909	42.3223401652	463.8819196016
127.1571483409	42.3223401652	463.7798180647
127.1571607909	42.3223401652	463.6777165278
127.1571732410	42.3223401652	463.5756149910
127.1571856910	42.3223401652	463.4735134542
127.1571981410	42.3223401652	463.3714119173
127.1572105910	42.3223401652	463.2693103805
127.1563639901	42.3223493265	470.0991357725
127.1563764401	42.3223493265	469.9947637149
127.1563888901	42.3223493265	469.8903916572
127.1564013401	42.3223493265	469.7860195996
127.1564137902	42.3223493265	469.6816475421
127.1564262402	42.3223493265	469.5772754844
127.1564386902	42.3223493265	469.4729034268
127.1564511402	42.3223493265	469.3685312621
127.1564635902	42.3223493265	469.2641587240
127.1564760402	42.3223493265	469.1597861860
127.1564884902	42.3223493265	469.0554136479
127.1565009402	42.3223493265	468.9510411099
127.1565133903	42.3223493265	468.8466685719
127.1565258403	42.3223493265	468.7422960338
127.1565382903	42.3223493265	468.6379236538
127.1565507403	42.3223493265	468.5335515963
127.1565631903	42.3223493265	468.4291795386
127.1565756403	42.3223493265	468.3248074810
127.1565880903	42.3223493265	468.2204354234
127.1566005404	42.3223493265	468.1160633657
127.1566129904	42.3223493265	468.0116913081
127.1566254404	42.3223493265	467.9073175343
127.1566378904	42.3223493265	467.8029415303
127.1566503404	42.3223493265	467.6985655265
127.1566627904	42.3223493265	467.5941895226
127.1566752404	42.3223493265	467.4898135187
127.1566876904	42.3223493265	467.3854375148
127.1567001405	42.3223493265	467.2810615109
127.1567125905	42.3223493265	467.1766852472
127.1567250405	42.3223493265	467.0723087629
127.1567374905	42.3223493265	466.9679322785
127.1567499405	42.3223493265	466.8635557943
127.1567623905	42.3223493265	466.7591793100
127.1567748405	42.3223493265	466.6548028257
127.1567872905	42.3223493265	466.5504263414
127.1567997406	42.3223493265	466.4460524099
127.1568121906	42.3223493265	466.3416798718
127.1568246406	42.3223493265	466.2373073338
127.1568370906	42.3223493265	466.1329347958
127.1568495406	42.3223493265	466.0285622577
127.1568619906	42.3223493265	465.9241897197
127.1568744406	42.3223493265	465.8198171817
127.1568868907	42.3223493265	465.7154450053
127.1568993407	42.3223493265	465.6110729477
127.1569117907	42.3223493265	465.5067008900
127.1569242407	42.3223493265	465.4023288324
127.1569366907	42.3223493265	465.2979567749
127.1569491407	42.3223493265	465.1935847172
127.1569615907	42.3223493265	465.0892126596
127.1569740407	42.3223493265	464.9848372129
127.1569864908	42.3223493265	464.8804612089
127.1569989408	42.3223493265	464.7760852051
127.1570113908	42.3223493265	464.6717092012
127.1570238408	42.3223493265	464.5673331973
127.1570362908	42.3223493265	464.4629571934
127.1570487408	42.3223493265	464.3585811896
127.1570611908	42.3223493265	464.2542085295
127.1570736409	42.3223493265	464.1498359915
127.1570860909	42.3223493265	464.0454634535
127.1570985409	42.3223493265	463.9410909154
127.1571109909	42.3223493265	463.8367183774
127.1571234409	42.3223493265	463.7323458393
127.1571358909	42.3223493265	463.6281511873
127.1571483409	42.3223493265	463.5262920363
127.1571607909	42.3223493265	463.4244328852
127.1571732410	42.3223493265	463.3225737342
127.1571856910	42.3223493265	463.2207145832
127.1571981410	42.3223493265	463.1188554320
127.1572105910	42.3223493265	463.0169962810
127.1563639901	42.3223584878	469.8453534607
127.1563764401	42.3223584878	469.7409814031
127.1563888901	42.3223584878	469.6366093454
127.1564013401	42.3223584878	469.5322372878
127.1564137902	42.3223584878	469.4278652302
127.1564262402	42.3223584878	469.3234931725
127.1564386902	42.3223584878	469.2191211150
127.1564511402	42.3223584878	469.1147488449
127.1564635902	42.3223584878	469.0103758343
127.1564760402	42.3223584878	468.9060028238
127.1564884902	42.3223584878	468.8016298132
127.1565009402	42.3223584878	468.6972568028
127.1565133903	42.3223584878	468.5928837923
127.1565258403	42.3223584878	468.4885107817
127.1565382903	42.3223584878	468.3841380847
127.1565507403	42.3223584878	468.2797660271
127.1565631903	42.3223584878	468.1753939694
127.1565756403	42.3223584878	468.0710219118
127.1565880903	42.3223584878	467.9666498542
127.1566005404	42.3223584878	467.8622777965
127.1566129904	42.3223584878	467.7579057390
127.1566254404	42.3223584878	467.6535321706
127.1566378904	42.3223584878	467.5491566391
127.1566503404	42.3223584878	467.4447811077
127.1566627904	42.3223584878	467.3404055764
127.1566752404	42.3223584878	467.2360300449
127.1566876904	42.3223584878	467.1316545136
127.1567001405	42.3223584878	467.0272789821
127.1567125905	42.3223584878	466.9229029353
127.1567250405	42.3223584878	466.8185264511
127.1567374905	42.3223584878	466.7141499667
127.1567499405	42.3223584878	466.6097734825
127.1567623905	42.3223584878	466.5053969982
127.1567748405	42.3223584878	466.4010205138
127.1567872905	42.3223584878	466.2966440296
127.1567997406	42.3223584878	466.1922697924
127.1568121906	42.3223584878	466.0878967818
127.1568246406	42.3223584878	465.9835237713
127.1568370906	42.3223584878	465.8791507609
127.1568495406	42.3223584878	465.7747777503
127.1568619906	42.3223584878	465.6704047398
127.1568744406	42.3223584878	465.5660317293
127.1568868907	42.3223584878	465.4616594361
127.1568993407	42.3223584878	465.3572873785
127.1569117907	42.3223584878	465.2529153208
127.1569242407	42.3223584878	465.1485432633
127.1569366907	42.3223584878	465.0441712057
127.1569491407	42.3223584878	464.9397991480
127.1569615907	42.3223584878	464.8354270904
127.1569740407	42.3223584878	464.7310520495
127.1569864908	42.3223584878	464.6266765180
127.1569989408	42.3223584878	464.5223009866
127.1570113908	42.3223584878	464.4179254553
127.1570238408	42.3223584878	464.3135499238
127.1570362908	42.3223584878	464.2091743925
127.1570487408	42.3223584878	464.1047988611
127.1570611908	42.3223584878	464.0004257618
127.1570736409	42.3223584878	463.8960527513
127.1570860909	42.3223584878	463.7916797408
127.1570985409	42.3223584878	463.6873067302
127.1571109909	42.3223584878	463.5829337198
127.1571234409	42.3223584878	463.4785607092
127.1571358909	42.3223584878	463.3743827731
127.1571483409	42.3223584878	463.2727660079
127.1571607909	42.3223584878	463.1711492425
127.1571732410	42.3223584878	463.0695324773
127.1571856910	42.3223584878	462.9679157121
127.1571981410	42.3223584878	462.8662989467
127.1572105910	42.3223584878	462.7646821815
127.1563639901	42.3223676490	469.5915711486
127.1563764401	42.3223676490	469.4871990910
127.1563888901	42.3223676490	469.3828270333
127.1564013401	42.3223676490	469.2784549758
127.1564137902	42.3223676490	469.1740829182
127.1564262402	42.3223676490	469.0697108605
127.1564386902	42.3223676490	468.9653388029
127.1564511402	42.3223676490	468.8609664275
127.1564635902	42.3223676490	468.7565929444
127.1564760402	42.3223676490	468.6522194615
127.1564884902	42.3223676490	468.5478459784
127.1565009402	42.3223676490	468.4434724954
127.1565133903	42.3223676490	468.3390990125
127.1565258403	42.3223676490	468.2347255294
127.1565382903	42.3223676490	468.1303525153
127.1565507403	42.3223676490	468.0259804577
127.1565631903	42.3223676490	467.9216084000
127.1565756403	42.3223676490	467.8172363424
127.1565880903	42.3223676490	467.7128642849
127.1566005404	42.3223676490	467.6084922272
127.1566129904	42.3223676490	467.5041201696
127.1566254404	42.3223676490	467.3997468067
127.1566378904	42.3223676490	467.2953717477
127.1566503404	42.3223676490	467.1909966888
127.1566627904	42.3223676490	467.0866216300
127.1566752404	42.3223676490	466.9822465710
127.1566876904	42.3223676490	466.8778715121
127.1567001405	42.3223676490	466.7734964531
127.1567125905	42.3223676490	466.6691206233
127.1567250405	42.3223676490	466.5647441390
127.1567374905	42.3223676490	466.4603676547
127.1567499405	42.3223676490	466.3559911704
127.1567623905	42.3223676490	466.2516146862
127.1567748405	42.3223676490	466.1472382018
127.1567872905	42.3223676490	466.0428617175
127.1567997406	42.3223676490	465.9384871747
127.1568121906	42.3223676490	465.8341136917
127.1568246406	42.3223676490	465.7297402087
127.1568370906	42.3223676490	465.6253667257
127.1568495406	42.3223676490	465.5209932426
127.1568619906	42.3223676490	465.4166197597
127.1568744406	42.3223676490	465.3122462767
127.1568868907	42.3223676490	465.2078738667
127.1568993407	42.3223676490	465.1035018092
127.1569117907	42.3223676490	464.9991297515
127.1569242407	42.3223676490	464.8947576939
127.1569366907	42.3223676490	464.7903856363
127.1569491407	42.3223676490	464.6860135786
127.1569615907	42.3223676490	464.5816415210
127.1569740407	42.3223676490	464.4772668859
127.1569864908	42.3223676490	464.3728918269
127.1569989408	42.3223676490	464.2685167680
127.1570113908	42.3223676490	464.1641417092
127.1570238408	42.3223676490	464.0597666502
127.1570362908	42.3223676490	463.9553915913
127.1570487408	42.3223676490	463.8510165324
127.1570611908	42.3223676490	463.7466429939
127.1570736409	42.3223676490	463.6422695109
127.1570860909	42.3223676490	463.5378960280
127.1570985409	42.3223676490	463.4335225449
127.1571109909	42.3223676490	463.3291490619
127.1571234409	42.3223676490	463.2247755788
127.1571358909	42.3223676490	463.1206143587
127.1571483409	42.3223676490	463.0192399793
127.1571607909	42.3223676490	462.9178655997
127.1571732410	42.3223676490	462.8164912203
127.1571856910	42.3223676490	462.7151168408
127.1571981410	42.3223676490	462.6137424613
127.1572105910	42.3223676490	462.5123680818
127.1563639901	42.3223768103	469.3377888368
127.1563764401	42.3223768103	469.2334167792
127.1563888901	42.3223768103	469.1290447215
127.1564013401	42.3223768103	469.0246726639
127.1564137902	42.3223768103	468.9203006063
127.1564262402	42.3223768103	468.8159285486
127.1564386902	42.3223768103	468.7115564911
127.1564511402	42.3223768103	468.6071840103
127.1564635902	42.3223768103	468.5028100548
127.1564760402	42.3223768103	468.3984360993
127.1564884902	42.3223768103	468.2940621437
127.1565009402	42.3223768103	468.1896881883
127.1565133903	42.3223768103	468.0853142328
127.1565258403	42.3223768103	467.9809402773
127.1565382903	42.3223768103	467.8765669461
127.1565507403	42.3223768103	467.7721948885
127.1565631903	42.3223768103	467.6678228308
127.1565756403	42.3223768103	467.5634507733
127.1565880903	42.3223768103	467.4590787157
127.1566005404	42.3223768103	467.3547066580
127.1566129904	42.3223768103	467.2503346004
127.1566254404	42.3223768103	467.1459614430
127.1566378904	42.3223768103	467.0415868565
127.1566503404	42.3223768103	466.9372122701
127.1566627904	42.3223768103	466.8328376837
127.1566752404	42.3223768103	466.7284630972
127.1566876904	42.3223768103	466.6240885109
127.1567001405	42.3223768103	466.5197139244
127.1567125905	42.3223768103	466.4153383114
127.1567250405	42.3223768103	466.3109618272
127.1567374905	42.3223768103	466.2065853428
127.1567499405	42.3223768103	466.1022088586
127.1567623905	42.3223768103	465.9978323743
127.1567748405	42.3223768103	465.8934558900
127.1567872905	42.3223768103	465.7890794057
127.1567997406	42.3223768103	465.6847045573
127.1568121906	42.3223768103	465.5803306017
127.1568246406	42.3223768103	465.4759566462
127.1568370906	42.3223768103	465.3715826908
127.1568495406	42.3223768103	465.2672087352
127.1568619906	42.3223768103	465.1628347798
127.1568744406	42.3223768103	465.0584608243
127.1568868907	42.3223768103	464.9540882976
127.1568993407	42.3223768103	464.8497162400
127.1569117907	42.3223768103	464.7453441823
127.1569242407	42.3223768103	464.6409721247
127.1569366907	42.3223768103	464.5366000671
127.1569491407	42.3223768103	464.4322280094
127.1569615907	42.3223768103	464.3278559518
127.1569740407	42.3223768103	464.2234817225
127.1569864908	42.3223768103	464.1191071360
127.1569989408	42.3223768103	464.0147325496
127.1570113908	42.3223768103	463.9103579632
127.1570238408	42.3223768103	463.8059833767
127.1570362908	42.3223768103	463.7016087903
127.1570487408	42.3223768103	463.5972342040
127.1570611908	42.3223768103	463.4928602262
127.1570736409	42.3223768103	463.3884862707
127.1570860909	42.3223768103	463.2841123153
127.1570985409	42.3223768103	463.1797383597
127.1571109909	42.3223768103	463.0753644043
127.1571234409	42.3223768103	462.9709904487
127.1571358909	42.3223768103	462.8668459445
127.1571483409	42.3223768103	462.7657139508
127.1571607909	42.3223768103	462.6645819571
127.1571732410	42.3223768103	462.5634499634
127.1571856910	42.3223768103	462.4623179698
127.1571981410	42.3223768103	462.3611859760
127.1572105910	42.3223768103	462.2600539823
127.1563639901	42.3223859715	469.0840065247
127.1563764401	42.3223859715	468.9796344672
127.1563888901	42.3223859715	468.8752624095
127.1564013401	42.3223859715	468.7708903519
127.1564137902	42.3223859715	468.6665182943
127.1564262402	42.3223859715	468.5621462366
127.1564386902	42.3223859715	468.4577741790
127.1564511402	42.3223859715	468.3534015929
127.1564635902	42.3223859715	468.2490271649
127.1564760402	42.3223859715	468.1446527369
127.1564884902	42.3223859715	468.0402783089
127.1565009402	42.3223859715	467.9359038810
127.1565133903	42.3223859715	467.8315294530
127.1565258403	42.3223859715	467.7271550250
127.1565382903	42.3223859715	467.6227813767
127.1565507403	42.3223859715	467.5184093192
127.1565631903	42.3223859715	467.4140372615
127.1565756403	42.3223859715	467.3096652039
127.1565880903	42.3223859715	467.2052931463
127.1566005404	42.3223859715	467.1009210886
127.1566129904	42.3223859715	466.9965490310
127.1566254404	42.3223859715	466.8921760791
127.1566378904	42.3223859715	466.7878019651
127.1566503404	42.3223859715	466.6834278512
127.1566627904	42.3223859715	466.5790537373
127.1566752404	42.3223859715	466.4746796233
127.1566876904	42.3223859715	466.3703055094
127.1567001405	42.3223859715	466.2659313954
127.1567125905	42.3223859715	466.1615559994
127.1567250405	42.3223859715	466.0571795152
127.1567374905	42.3223859715	465.9528030308
127.1567499405	42.3223859715	465.8484265465
127.1567623905	42.3223859715	465.7440500623
127.1567748405	42.3223859715	465.6396735779
127.1567872905	42.3223859715	465.5352970937
127.1567997406	42.3223859715	465.4309219396
127.1568121906	42.3223859715	465.3265475115
127.1568246406	42.3223859715	465.2221730836
127.1568370906	42.3223859715	465.1177986557
127.1568495406	42.3223859715	465.0134242276
127.1568619906	42.3223859715	464.9090497997
127.1568744406	42.3223859715	464.8046753717
127.1568868907	42.3223859715	464.7003027282
127.1568993407	42.3223859715	464.5959306706
127.1569117907	42.3223859715	464.4915586129
127.1569242407	42.3223859715	464.3871865553
127.1569366907	42.3223859715	464.2828144977
127.1569491407	42.3223859715	464.1784424401
127.1569615907	42.3223859715	464.0740703825
127.1569740407	42.3223859715	463.9696965589
127.1569864908	42.3223859715	463.8653224449
127.1569989408	42.3223859715	463.7609483310
127.1570113908	42.3223859715	463.6565742171
127.1570238408	42.3223859715	463.5522001031
127.1570362908	42.3223859715	463.4478259892
127.1570487408	42.3223859715	463.3434518753
127.1570611908	42.3223859715	463.2390774583
127.1570736409	42.3223859715	463.1347030304
127.1570860909	42.3223859715	463.0303286024
127.1570985409	42.3223859715	462.9259541744
127.1571109909	42.3223859715	462.8215797464
127.1571234409	42.3223859715	462.7172053184
127.1571358909	42.3223859715	462.6130775301
127.1571483409	42.3223859715	462.5121879222
127.1571607909	42.3223859715	462.4112983142
127.1571732410	42.3223859715	462.3104087064
127.1571856910	42.3223859715	462.2095190985
127.1571981410	42.3223859715	462.1086294905
127.1572105910	42.3223859715	462.0077398827
127.1563639901	42.3223951328	468.8302242129
127.1563764401	42.3223951328	468.7258521553
127.1563888901	42.3223951328	468.6214800976
127.1564013401	42.3223951328	468.5171080400
127.1564137902	42.3223951328	468.4127359825
127.1564262402	42.3223951328	468.3083639248
127.1564386902	42.3223951328	468.2039918672
127.1564511402	42.3223951328	468.0996191758
127.1564635902	42.3223951328	467.9952442752
127.1564760402	42.3223951328	467.8908693748
127.1564884902	42.3223951328	467.7864944742
127.1565009402	42.3223951328	467.6821195738
127.1565133903	42.3223951328	467.5777446734
127.1565258403	42.3223951328	467.4733697728
127.1565382903	42.3223951328	467.3689958076
127.1565507403	42.3223951328	467.2646237500
127.1565631903	42.3223951328	467.1602516923
127.1565756403	42.3223951328	467.0558796347
127.1565880903	42.3223951328	466.9515075771
127.1566005404	42.3223951328	466.8471355194
127.1566129904	42.3223951328	466.7427634618
127.1566254404	42.3223951328	466.6383907154
127.1566378904	42.3223951328	466.5340170739
127.1566503404	42.3223951328	466.4296434325
127.1566627904	42.3223951328	466.3252697911
127.1566752404	42.3223951328	466.2208961496
127.1566876904	42.3223951328	466.1165225082
127.1567001405	42.3223951328	466.0121488666
127.1567125905	42.3223951328	465.9077736876
127.1567250405	42.3223951328	465.8033972033
127.1567374905	42.3223951328	465.6990207189
127.1567499405	42.3223951328	465.5946442347
127.1567623905	42.3223951328	465.4902677504
127.1567748405	42.3223951328	465.3858912661
127.1567872905	42.3223951328	465.2815147818
127.1567997406	42.3223951328	465.1771393221
127.1568121906	42.3223951328	465.0727644216
127.1568246406	42.3223951328	464.9683895211
127.1568370906	42.3223951328	464.8640146207
127.1568495406	42.3223951328	464.7596397202
127.1568619906	42.3223951328	464.6552648197
127.1568744406	42.3223951328	464.5508899193
127.1568868907	42.3223951328	464.4465171590
127.1568993407	42.3223951328	464.3421451014
127.1569117907	42.3223951328	464.2377730437
127.1569242407	42.3223951328	464.1334009862
127.1569366907	42.3223951328	464.0290289286
127.1569491407	42.3223951328	463.9246568709
127.1569615907	42.3223951328	463.8202848133
127.1569740407	42.3223951328	463.7159113955
127.1569864908	42.3223951328	463.6115377540
127.1569989408	42.3223951328	463.5071641126
127.1570113908	42.3223951328	463.4027904712
127.1570238408	42.3223951328	463.2984168296
127.1570362908	42.3223951328	463.1940431882
127.1570487408	42.3223951328	463.0896695468
127.1570611908	42.3223951328	462.9852946906
127.1570736409	42.3223951328	462.8809197902
127.1570860909	42.3223951328	462.7765448898
127.1570985409	42.3223951328	462.6721699892
127.1571109909	42.3223951328	462.5677950888
127.1571234409	42.3223951328	462.4634201882
127.1571358909	42.3223951328	462.3593091158
127.1571483409	42.3223951328	462.2586618938
127.1571607909	42.3223951328	462.1580146716
127.1571732410	42.3223951328	462.0573674495
127.1571856910	42.3223951328	461.9567202274
127.1571981410	42.3223951328	461.8560730052
127.1572105910	42.3223951328	461.7554257832
127.1563639901	42.3224042940	468.5764419009
127.1563764401	42.3224042940	468.4720698433
127.1563888901	42.3224042940	468.3676977856
127.1564013401	42.3224042940	468.2633257280
127.1564137902	42.3224042940	468.1589536704
127.1564262402	42.3224042940	468.0545816127
127.1564386902	42.3224042940	467.9502095552
127.1564511402	42.3224042940	467.8458367584
127.1564635902	42.3224042940	467.7414613853
127.1564760402	42.3224042940	467.6370860124
127.1564884902	42.3224042940	467.5327106394
127.1565009402	42.3224042940	467.4283352665
127.1565133903	42.3224042940	467.3239598936
127.1565258403	42.3224042940	467.2195845205
127.1565382903	42.3224042940	467.1152102382
127.1565507403	42.3224042940	467.0108381806
127.1565631903	42.3224042940	466.9064661229
127.1565756403	42.3224042940	466.8020940653
127.1565880903	42.3224042940	466.6977220077
127.1566005404	42.3224042940	466.5933499501
127.1566129904	42.3224042940	466.4889778925
127.1566254404	42.3224042940	466.3846053516
127.1566378904	42.3224042940	466.2802321825
127.1566503404	42.3224042940	466.1758590136
127.1566627904	42.3224042940	466.0714858447
127.1566752404	42.3224042940	465.9671126756
127.1566876904	42.3224042940	465.8627395067
127.1567001405	42.3224042940	465.7583663377
127.1567125905	42.3224042940	465.6539913755
127.1567250405	42.3224042940	465.5496148913
127.1567374905	42.3224042940	465.4452384069
127.1567499405	42.3224042940	465.3408619227
127.1567623905	42.3224042940	465.2364854384
127.1567748405	42.3224042940	465.1321089540
127.1567872905	42.3224042940	465.0277324698
127.1567997406	42.3224042940	464.9233567044
127.1568121906	42.3224042940	464.8189813314
127.1568246406	42.3224042940	464.7146059585
127.1568370906	42.3224042940	464.6102305856
127.1568495406	42.3224042940	464.5058552125
127.1568619906	42.3224042940	464.4014798396
127.1568744406	42.3224042940	464.2971044667
127.1568868907	42.3224042940	464.1927315896
127.1568993407	42.3224042940	464.0883595321
127.1569117907	42.3224042940	463.9839874744
127.1569242407	42.3224042940	463.8796154168
127.1569366907	42.3224042940	463.7752433592
127.1569491407	42.3224042940	463.6708713015
127.1569615907	42.3224042940	463.5664992439
127.1569740407	42.3224042940	463.4621262319
127.1569864908	42.3224042940	463.3577530629
127.1569989408	42.3224042940	463.2533798939
127.1570113908	42.3224042940	463.1490067250
127.1570238408	42.3224042940	463.0446335560
127.1570362908	42.3224042940	462.9402603871
127.1570487408	42.3224042940	462.8358872182
127.1570611908	42.3224042940	462.7315119227
127.1570736409	42.3224042940	462.6271365498
127.1570860909	42.3224042940	462.5227611769
127.1570985409	42.3224042940	462.4183858039
127.1571109909	42.3224042940	462.3140104309
127.1571234409	42.3224042940	462.2096350579
127.1571358909	42.3224042940	462.1055407014
127.1571483409	42.3224042940	462.0051358651
127.1571607909	42.3224042940	461.9047310287
127.1571732410	42.3224042940	461.8043261924
127.1571856910	42.3224042940	461.7039213562
127.1571981410	42.3224042940	461.6035165198
127.1572105910	42.3224042940	461.5031116835
127.1563639901	42.3224134553	468.3226595890
127.1563764401	42.3224134553	468.2182875314
127.1563888901	42.3224134553	468.1139154737
127.1564013401	42.3224134553	468.0095434162
127.1564137902	42.3224134553	467.9051713586
127.1564262402	42.3224134553	467.8007993009
127.1564386902	42.3224134553	467.6964272433
127.1564511402	42.3224134553	467.5920543412
127.1564635902	42.3224134553	467.4876784957
127.1564760402	42.3224134553	467.3833026503
127.1564884902	42.3224134553	467.2789268047
127.1565009402	42.3224134553	467.1745509593
127.1565133903	42.3224134553	467.0701751139
127.1565258403	42.3224134553	466.9657992684
127.1565382903	42.3224134553	466.8614246690
127.1565507403	42.3224134553	466.7570526114
127.1565631903	42.3224134553	466.6526805537
127.1565756403	42.3224134553	466.5483084961
127.1565880903	42.3224134553	466.4439364386
127.1566005404	42.3224134553	466.3395643809
127.1566129904	42.3224134553	466.2351923233
127.1566254404	42.3224134553	466.1308199879
127.1566378904	42.3224134553	466.0264472913
127.1566503404	42.3224134553	465.9220745949
127.1566627904	42.3224134553	465.8177018985
127.1566752404	42.3224134553	465.7133292019
127.1566876904	42.3224134553	465.6089565055
127.1567001405	42.3224134553	465.5045838089
127.1567125905	42.3224134553	465.4002090637
127.1567250405	42.3224134553	465.2958325794
127.1567374905	42.3224134553	465.1914560951
127.1567499405	42.3224134553	465.0870796108
127.1567623905	42.3224134553	464.9827031266
127.1567748405	42.3224134553	464.8783266422
127.1567872905	42.3224134553	464.7739501579
127.1567997406	42.3224134553	464.6695740869
127.1568121906	42.3224134553	464.5651982414
127.1568246406	42.3224134553	464.4608223960
127.1568370906	42.3224134553	464.3564465506
127.1568495406	42.3224134553	464.2520707051
127.1568619906	42.3224134553	464.1476948597
127.1568744406	42.3224134553	464.0433190143
127.1568868907	42.3224134553	463.9389460205
127.1568993407	42.3224134553	463.8345739629
127.1569117907	42.3224134553	463.7302019052
127.1569242407	42.3224134553	463.6258298476
127.1569366907	42.3224134553	463.5214577900
127.1569491407	42.3224134553	463.4170857323
127.1569615907	42.3224134553	463.3127136747
127.1569740407	42.3224134553	463.2083410685
127.1569864908	42.3224134553	463.1039683720
127.1569989408	42.3224134553	462.9995956755
127.1570113908	42.3224134553	462.8952229791
127.1570238408	42.3224134553	462.7908502825
127.1570362908	42.3224134553	462.6864775861
127.1570487408	42.3224134553	462.5821048897
127.1570611908	42.3224134553	462.4777291550
127.1570736409	42.3224134553	462.3733533096
127.1570860909	42.3224134553	462.2689774642
127.1570985409	42.3224134553	462.1646016187
127.1571109909	42.3224134553	462.0602257733
127.1571234409	42.3224134553	461.9558499278
127.1571358909	42.3224134553	461.8517722872
127.1571483409	42.3224134553	461.7516098367
127.1571607909	42.3224134553	461.6514473861
127.1571732410	42.3224134553	461.5512849356
127.1571856910	42.3224134553	461.4511224851
127.1571981410	42.3224134553	461.3509600345
127.1572105910	42.3224134553	461.2507975840
127.1563639901	42.3224226166	468.0688772772
127.1563764401	42.3224226166	467.9645052196
127.1563888901	42.3224226166	467.8601331619
127.1564013401	42.3224226166	467.7557611043
127.1564137902	42.3224226166	467.6513890467
127.1564262402	42.3224226166	467.5470169890
127.1564386902	42.3224226166	467.4426449315
127.1564511402	42.3224226166	467.3382719240
127.1564635902	42.3224226166	467.2338956060
127.1564760402	42.3224226166	467.1295192881
127.1564884902	42.3224226166	467.0251429701
127.1565009402	42.3224226166	466.9207666522
127.1565133903	42.3224226166	466.8163903343
127.1565258403	42.3224226166	466.7120140163
127.1565382903	42.3224226166	466.6076390998
127.1565507403	42.3224226166	466.5032670422
127.1565631903	42.3224226166	466.3988949845
127.1565756403	42.3224226166	466.2945229270
127.1565880903	42.3224226166	466.1901508694
127.1566005404	42.3224226166	466.0857788117
127.1566129904	42.3224226166	465.9814067541
127.1566254404	42.3224226166	465.8770346242
127.1566378904	42.3224226166	465.7726624001
127.1566503404	42.3224226166	465.6682901762
127.1566627904	42.3224226166	465.5639179522
127.1566752404	42.3224226166	465.4595457282
127.1566876904	42.3224226166	465.3551735042
127.1567001405	42.3224226166	465.2508012802
127.1567125905	42.3224226166	465.1464267518
127.1567250405	42.3224226166	465.0420502676
127.1567374905	42.3224226166	464.9376737832
127.1567499405	42.3224226166	464.8332972990
127.1567623905	42.3224226166	464.7289208147
127.1567748405	42.3224226166	464.6245443304
127.1567872905	42.3224226166	464.5201678461
127.1567997406	42.3224226166	464.4157914695
127.1568121906	42.3224226166	464.3114151515
127.1568246406	42.3224226166	464.2070388336
127.1568370906	42.3224226166	464.1026625157
127.1568495406	42.3224226166	463.9982861977
127.1568619906	42.3224226166	463.8939098798
127.1568744406	42.3224226166	463.7895335619
127.1568868907	42.3224226166	463.6851604513
127.1568993407	42.3224226166	463.5807883937
127.1569117907	42.3224226166	463.4764163360
127.1569242407	42.3224226166	463.3720442784
127.1569366907	42.3224226166	463.2676722208
127.1569491407	42.3224226166	463.1633001631
127.1569615907	42.3224226166	463.0589281056
127.1569740407	42.3224226166	462.9545559051
127.1569864908	42.3224226166	462.8501836810
127.1569989408	42.3224226166	462.7458114571
127.1570113908	42.3224226166	462.6414392332
127.1570238408	42.3224226166	462.5370670091
127.1570362908	42.3224226166	462.4326947851
127.1570487408	42.3224226166	462.3283225612
127.1570611908	42.3224226166	462.2239463873
127.1570736409	42.3224226166	462.1195700694
127.1570860909	42.3224226166	462.0151937515
127.1570985409	42.3224226166	461.9108174335
127.1571109909	42.3224226166	461.8064411157
127.1571234409	42.3224226166	461.7020647976
127.1571358909	42.3224226166	461.5980038730
127.1571483409	42.3224226166	461.4980838083
127.1571607909	42.3224226166	461.3981637434
127.1571732410	42.3224226166	461.2982436787
127.1571856910	42.3224226166	461.1983236140
127.1571981410	42.3224226166	461.0984035492
127.1572105910	42.3224226166	460.9984834845
127.1563639901	42.3224317778	467.8150949651
127.1563764401	42.3224317778	467.7107229076
127.1563888901	42.3224317778	467.6063508499
127.1564013401	42.3224317778	467.5019787923
127.1564137902	42.3224317778	467.3976067347
127.1564262402	42.3224317778	467.2932346770
127.1564386902	42.3224317778	467.1888626194
127.1564511402	42.3224317778	467.0845245896
127.1564635902	42.3224317778	466.9803051457
127.1564760402	42.3224317778	466.8760857020
127.1564884902	42.3224317778	466.7718662581
127.1565009402	42.3224317778	466.6676468144
127.1565133903	42.3224317778	466.5634273706
127.1565258403	42.3224317778	466.4592079268
127.1565382903	42.3224317778	466.3549898385
127.1565507403	42.3224317778	466.2507745153
127.1565631903	42.3224317778	466.1465591919
127.1565756403	42.3224317778	466.0423438688
127.1565880903	42.3224317778	465.9381285456
127.1566005404	42.3224317778	465.8339132222
127.1566129904	42.3224317778	465.7296978990
127.1566254404	42.3224317778	465.6254825759
127.1566378904	42.3224317778	465.5212672525
127.1566503404	42.3224317778	465.4170519293
127.1566627904	42.3224317778	465.3128366061
127.1566752404	42.3224317778	465.2086212828
127.1566876904	42.3224317778	465.1044059596
127.1567001405	42.3224317778	465.0001906363
127.1567125905	42.3224317778	464.8959730843
127.1567250405	42.3224317778	464.7917536406
127.1567374905	42.3224317778	464.6875341967
127.1567499405	42.3224317778	464.5833147530
127.1567623905	42.3224317778	464.4790953092
127.1567748405	42.3224317778	464.3748758654
127.1567872905	42.3224317778	464.2706564216
127.1567997406	42.3224317778	464.1664369779
127.1568121906	42.3224317778	464.0622175340
127.1568246406	42.3224317778	463.9579980903
127.1568370906	42.3224317778	463.8537786465
127.1568495406	42.3224317778	463.7495592027
127.1568619906	42.3224317778	463.6453397589
127.1568744406	42.3224317778	463.5411203152
127.1568868907	42.3224317778	463.4369039735
127.1568993407	42.3224317778	463.3326886503
127.1569117907	42.3224317778	463.2284733269
127.1569242407	42.3224317778	463.1242580038
127.1569366907	42.3224317778	463.0200426806
127.1569491407	42.3224317778	462.9158273572
127.1569615907	42.3224317778	462.8116120340
127.1569740407	42.3224317778	462.7073967108
127.1569864908	42.3224317778	462.6031813875
127.1569989408	42.3224317778	462.4989660643
127.1570113908	42.3224317778	462.3947507411
127.1570238408	42.3224317778	462.2905354178
127.1570362908	42.3224317778	462.1863200946
127.1570487408	42.3224317778	462.0821047714
127.1570611908	42.3224317778	461.9778854726
127.1570736409	42.3224317778	461.8736660289
127.1570860909	42.3224317778	461.7694465851
127.1570985409	42.3224317778	461.6652271413
127.1571109909	42.3224317778	461.5610076975
127.1571234409	42.3224317778	461.4567882537
127.1571358909	42.3224317778	461.3528791623
127.1571483409	42.3224317778	461.2530447490
127.1571607909	42.3224317778	461.1532103356
127.1571732410	42.3224317778	461.0533759223
127.1571856910	42.3224317778	460.9535415090
[truncated: 2,969 more rows]
