# Supplementary material for: Simulation Study on Coverage Path Planning of Autonomous Tasks in Hilly Farmland Based on Energy Consumption Model
Source: Hindawi journal article supplement (doi:10.1155/2020/4535734), 2020-08-30
Supplement: f1 [file 4535734.f1.zip › 4535734.f1/Algorithm-pathplanning-matlab/2020.04.25/0707/2.csv]

Longitude	Latitude	Elevation
127.1571719085	42.3226531503	0.0000000000
127.1566096705	42.3228257119	0.0000000000
127.1563639901	42.3223824562	0.0000000000
127.1566783062	42.3222519297	0.0000000000
127.1569546504	42.3221752626	0.0000000000
127.1570361577	42.3223342170	0.0000000000
127.1571082659	42.3223967611	0.0000000000
127.1572105910	42.3225805545	0.0000000000
127.1571719085	42.3226531503	0.0000000000
