# Supplementary material for: Simulation Study on Coverage Path Planning of Autonomous Tasks in Hilly Farmland Based on Energy Consumption Model
Source: Hindawi journal article supplement (doi:10.1155/2020/4535734), 2020-08-30
Supplement: f1 [file 4535734.f1.zip › 4535734.f1/Algorithm-pathplanning-matlab/2020.04.25/0808/1.csv]

Longitude	Latitude	Elevation
127.1555425294	42.3216205358	496.1891528755
127.1555549233	42.3216205358	496.1409655543
127.1555673171	42.3216205358	496.0927782331
127.1555797110	42.3216205358	496.0445909119
127.1555921048	42.3216205358	495.9964035907
127.1556044987	42.3216205358	495.9482162695
127.1556168926	42.3216205358	495.9000289483
127.1556292864	42.3216205358	495.8518416271
127.1556416803	42.3216205358	495.8036543059
127.1556540741	42.3216205358	495.7554669847
127.1556664680	42.3216205358	495.7072796635
127.1556788618	42.3216205358	495.6590923423
127.1556912557	42.3216205358	495.6109050211
127.1557036496	42.3216205358	495.5627176999
127.1557160434	42.3216205358	495.5145303787
127.1557284373	42.3216205358	495.4663430575
127.1557408311	42.3216205358	495.4181557363
127.1557532250	42.3216205358	495.3699684151
127.1557656188	42.3216205358	495.3042795353
127.1557780127	42.3216205358	495.2003782405
127.1557904066	42.3216205358	495.0964769456
127.1558028004	42.3216205358	494.9925756507
127.1558151943	42.3216205358	494.8886743558
127.1558275881	42.3216205358	494.7847730610
127.1558399820	42.3216205358	494.6808717661
127.1558523759	42.3216205358	494.5769687552
127.1558647697	42.3216205358	494.4730630537
127.1558771636	42.3216205358	494.3691573521
127.1558895574	42.3216205358	494.2652516506
127.1559019513	42.3216205358	494.1613459490
127.1559143451	42.3216205358	494.0574402474
127.1559267390	42.3216205358	493.9535345458
127.1559391329	42.3216205358	493.8496301073
127.1559515267	42.3216205358	493.7457271269
127.1559639206	42.3216205358	493.6418241465
127.1559763144	42.3216205358	493.5379211661
127.1559887083	42.3216205358	493.4340181856
127.1560011022	42.3216205358	493.3301152052
127.1560134960	42.3216205358	493.2262122248
127.1560258899	42.3216205358	493.1223101527
127.1560382837	42.3216205358	493.0184088578
127.1560506776	42.3216205358	492.9145075630
127.1560630715	42.3216205358	492.8106062681
127.1560754653	42.3216205358	492.7067049733
127.1560878592	42.3216205358	492.6028036785
127.1561002530	42.3216205358	492.4989023836
127.1561126469	42.3216205358	492.3949994189
127.1561250407	42.3216205358	492.2910954029
127.1561374346	42.3216205358	492.1871913869
127.1561498285	42.3216205358	492.0832873709
127.1561622223	42.3216205358	491.9793833549
127.1561746162	42.3216205358	491.8754793390
127.1561870100	42.3216205358	491.7715753229
127.1561994039	42.3216205358	491.6676731802
127.1562117978	42.3216205358	491.5637718852
127.1562241916	42.3216205358	491.4598705904
127.1562365855	42.3216205358	491.3559692955
127.1562489793	42.3216205358	491.2520680007
127.1562613732	42.3216205358	491.1481667058
127.1562737670	42.3216205358	491.0442654110
127.1562861609	42.3216205358	490.9403620396
127.1562985548	42.3216205358	490.8364580236
127.1563109486	42.3216205358	490.7325540076
127.1563233425	42.3216205358	490.6286499916
127.1563357363	42.3216205358	490.5247459756
127.1563481302	42.3216205358	490.4208419595
127.1563605241	42.3216205358	490.3169379436
127.1563729179	42.3216205358	490.2130347952
127.1563853118	42.3216205358	490.1091318148
127.1563977056	42.3216205358	490.0052288345
127.1564100995	42.3216205358	489.9013258540
127.1564224933	42.3216205358	489.7974228736
127.1564348872	42.3216205358	489.6935198931
127.1564472811	42.3216205358	489.5896169127
127.1564596749	42.3216205358	489.4714641147
127.1564720688	42.3216205358	489.3519466399
127.1564844626	42.3216205358	489.2324291651
127.1564968565	42.3216205358	489.1129116901
127.1565092503	42.3216205358	488.9933942153
127.1565216442	42.3216205358	488.8738767404
127.1565340381	42.3216205358	488.7543592655
127.1565464319	42.3216205358	488.6348434548
127.1565588258	42.3216205358	488.5153276656
127.1565712196	42.3216205358	488.3958118762
127.1565836135	42.3216205358	488.2762960869
127.1555425294	42.3216295834	495.9385204222
127.1555549233	42.3216295834	495.8903331010
127.1555673171	42.3216295834	495.8421457797
127.1555797110	42.3216295834	495.7939584586
127.1555921048	42.3216295834	495.7457711373
127.1556044987	42.3216295834	495.6975838162
127.1556168926	42.3216295834	495.6493964949
127.1556292864	42.3216295834	495.6012091738
127.1556416803	42.3216295834	495.5530218525
127.1556540741	42.3216295834	495.5048345314
127.1556664680	42.3216295834	495.4566472102
127.1556788618	42.3216295834	495.4084598889
127.1556912557	42.3216295834	495.3602725678
127.1557036496	42.3216295834	495.3120852465
127.1557160434	42.3216295834	495.2638979254
127.1557284373	42.3216295834	495.2157106041
127.1557408311	42.3216295834	495.1675232830
127.1557532250	42.3216295834	495.1193359618
127.1557656188	42.3216295834	495.0536470819
127.1557780127	42.3216295834	494.9497457871
127.1557904066	42.3216295834	494.8458444922
127.1558028004	42.3216295834	494.7419431974
127.1558151943	42.3216295834	494.6380419025
127.1558275881	42.3216295834	494.5341406077
127.1558399820	42.3216295834	494.4302393128
127.1558523759	42.3216295834	494.3263363019
127.1558647697	42.3216295834	494.2224306004
127.1558771636	42.3216295834	494.1185248987
127.1558895574	42.3216295834	494.0146191972
127.1559019513	42.3216295834	493.9107134956
127.1559143451	42.3216295834	493.8068077941
127.1559267390	42.3216295834	493.7029020925
127.1559391329	42.3216295834	493.5989978696
127.1559515267	42.3216295834	493.4950953536
127.1559639206	42.3216295834	493.3911928378
127.1559763144	42.3216295834	493.2872903219
127.1559887083	42.3216295834	493.1833878060
127.1560011022	42.3216295834	493.0794852901
127.1560134960	42.3216295834	492.9755827741
127.1560258899	42.3216295834	492.8716809163
127.1560382837	42.3216295834	492.7677796214
127.1560506776	42.3216295834	492.6638783266
127.1560630715	42.3216295834	492.5599770317
127.1560754653	42.3216295834	492.4560757368
127.1560878592	42.3216295834	492.3521744420
127.1561002530	42.3216295834	492.2482731471
127.1561126469	42.3216295834	492.1443698975
127.1561250407	42.3216295834	492.0404654169
127.1561374346	42.3216295834	491.9365609364
127.1561498285	42.3216295834	491.8326564558
127.1561622223	42.3216295834	491.7287519754
127.1561746162	42.3216295834	491.6248474949
127.1561870100	42.3216295834	491.5209430143
127.1561994039	42.3216295834	491.4170407268
127.1562117978	42.3216295834	491.3131394319
127.1562241916	42.3216295834	491.2092381371
127.1562365855	42.3216295834	491.1053368422
127.1562489793	42.3216295834	491.0014355474
127.1562613732	42.3216295834	490.8975342524
127.1562737670	42.3216295834	490.7936329576
127.1562861609	42.3216295834	490.6897292318
127.1562985548	42.3216295834	490.5858247512
127.1563109486	42.3216295834	490.4819202708
127.1563233425	42.3216295834	490.3780157902
127.1563357363	42.3216295834	490.2741113097
127.1563481302	42.3216295834	490.1702068291
127.1563605241	42.3216295834	490.0663023487
127.1563729179	42.3216295834	489.9623995142
127.1563853118	42.3216295834	489.8584969983
127.1563977056	42.3216295834	489.7545944825
127.1564100995	42.3216295834	489.6506919665
127.1564224933	42.3216295834	489.5467894506
127.1564348872	42.3216295834	489.4428869347
127.1564472811	42.3216295834	489.3389844188
127.1564596749	42.3216295834	489.2219185921
127.1564720688	42.3216295834	489.1035921411
127.1564844626	42.3216295834	488.9852656902
127.1564968565	42.3216295834	488.8669392392
127.1565092503	42.3216295834	488.7486127883
127.1565216442	42.3216295834	488.6302863372
127.1565340381	42.3216295834	488.5119598863
127.1565464319	42.3216295834	488.3936346409
127.1565588258	42.3216295834	488.2753094110
127.1565712196	42.3216295834	488.1569841810
127.1565836135	42.3216295834	488.0386589512
127.1555425294	42.3216386309	495.6878879690
127.1555549233	42.3216386309	495.6397006478
127.1555673171	42.3216386309	495.5915133266
127.1555797110	42.3216386309	495.5433260054
127.1555921048	42.3216386309	495.4951386842
127.1556044987	42.3216386309	495.4469513630
127.1556168926	42.3216386309	495.3987640418
127.1556292864	42.3216386309	495.3505767206
127.1556416803	42.3216386309	495.3023893994
127.1556540741	42.3216386309	495.2542020782
127.1556664680	42.3216386309	495.2060147570
127.1556788618	42.3216386309	495.1578274358
127.1556912557	42.3216386309	495.1096401146
127.1557036496	42.3216386309	495.0614527934
127.1557160434	42.3216386309	495.0132654722
127.1557284373	42.3216386309	494.9650781510
127.1557408311	42.3216386309	494.9168908298
127.1557532250	42.3216386309	494.8687035086
127.1557656188	42.3216386309	494.8030146288
127.1557780127	42.3216386309	494.6991133340
127.1557904066	42.3216386309	494.5952120391
127.1558028004	42.3216386309	494.4913107443
127.1558151943	42.3216386309	494.3874094493
127.1558275881	42.3216386309	494.2835081545
127.1558399820	42.3216386309	494.1796068596
127.1558523759	42.3216386309	494.0757038487
127.1558647697	42.3216386309	493.9717981472
127.1558771636	42.3216386309	493.8678924456
127.1558895574	42.3216386309	493.7639867441
127.1559019513	42.3216386309	493.6600810425
127.1559143451	42.3216386309	493.5561753410
127.1559267390	42.3216386309	493.4522696393
127.1559391329	42.3216386309	493.3483656321
127.1559515267	42.3216386309	493.2444635806
127.1559639206	42.3216386309	493.1405615293
127.1559763144	42.3216386309	493.0366594780
127.1559887083	42.3216386309	492.9327574265
127.1560011022	42.3216386309	492.8288553752
127.1560134960	42.3216386309	492.7249533237
127.1560258899	42.3216386309	492.6210516801
127.1560382837	42.3216386309	492.5171503851
127.1560506776	42.3216386309	492.4132490903
127.1560630715	42.3216386309	492.3093477954
127.1560754653	42.3216386309	492.2054465006
127.1560878592	42.3216386309	492.1015452058
127.1561002530	42.3216386309	491.9976439109
127.1561126469	42.3216386309	491.8937403762
127.1561250407	42.3216386309	491.7898354311
127.1561374346	42.3216386309	491.6859304861
127.1561498285	42.3216386309	491.5820255410
127.1561622223	42.3216386309	491.4781205960
127.1561746162	42.3216386309	491.3742156510
127.1561870100	42.3216386309	491.2703107060
127.1561994039	42.3216386309	491.1664082737
127.1562117978	42.3216386309	491.0625069788
127.1562241916	42.3216386309	490.9586056840
127.1562365855	42.3216386309	490.8547043890
127.1562489793	42.3216386309	490.7508030942
127.1562613732	42.3216386309	490.6469017993
127.1562737670	42.3216386309	490.5430005045
127.1562861609	42.3216386309	490.4390964242
127.1562985548	42.3216386309	490.3351914791
127.1563109486	42.3216386309	490.2312865341
127.1563233425	42.3216386309	490.1273815890
127.1563357363	42.3216386309	490.0234766440
127.1563481302	42.3216386309	489.9195716989
127.1563605241	42.3216386309	489.8156667539
127.1563729179	42.3216386309	489.7117642333
127.1563853118	42.3216386309	489.6078621820
127.1563977056	42.3216386309	489.5039601306
127.1564100995	42.3216386309	489.4000580792
127.1564224933	42.3216386309	489.2961560279
127.1564348872	42.3216386309	489.1922539764
127.1564472811	42.3216386309	489.0883519251
127.1564596749	42.3216386309	488.9723730696
127.1564720688	42.3216386309	488.8552376426
127.1564844626	42.3216386309	488.7381022156
127.1564968565	42.3216386309	488.6209667885
127.1565092503	42.3216386309	488.5038313615
127.1565216442	42.3216386309	488.3866959343
127.1565340381	42.3216386309	488.2695605073
127.1565464319	42.3216386309	488.1524258271
127.1565588258	42.3216386309	488.0352911567
127.1565712196	42.3216386309	487.9181564861
127.1565836135	42.3216386309	487.8010218156
127.1555425294	42.3216476785	495.4372555157
127.1555549233	42.3216476785	495.3890681945
127.1555673171	42.3216476785	495.3408808733
127.1555797110	42.3216476785	495.2926935521
127.1555921048	42.3216476785	495.2445062309
127.1556044987	42.3216476785	495.1963189097
127.1556168926	42.3216476785	495.1481315885
127.1556292864	42.3216476785	495.0999442673
127.1556416803	42.3216476785	495.0517569460
127.1556540741	42.3216476785	495.0035696249
127.1556664680	42.3216476785	494.9553823037
127.1556788618	42.3216476785	494.9071949825
127.1556912557	42.3216476785	494.8590076613
127.1557036496	42.3216476785	494.8108203401
127.1557160434	42.3216476785	494.7626330189
127.1557284373	42.3216476785	494.7144456976
127.1557408311	42.3216476785	494.6662583765
127.1557532250	42.3216476785	494.6180710553
127.1557656188	42.3216476785	494.5523821755
127.1557780127	42.3216476785	494.4484808806
127.1557904066	42.3216476785	494.3445795857
127.1558028004	42.3216476785	494.2406782909
127.1558151943	42.3216476785	494.1367769960
127.1558275881	42.3216476785	494.0328757012
127.1558399820	42.3216476785	493.9289744063
127.1558523759	42.3216476785	493.8250713954
127.1558647697	42.3216476785	493.7211656939
127.1558771636	42.3216476785	493.6172599923
127.1558895574	42.3216476785	493.5133542908
127.1559019513	42.3216476785	493.4094485891
127.1559143451	42.3216476785	493.3055428876
127.1559267390	42.3216476785	493.2016371860
127.1559391329	42.3216476785	493.0977333944
127.1559515267	42.3216476785	492.9938318074
127.1559639206	42.3216476785	492.8899302206
127.1559763144	42.3216476785	492.7860286338
127.1559887083	42.3216476785	492.6821270468
127.1560011022	42.3216476785	492.5782254600
127.1560134960	42.3216476785	492.4743238731
127.1560258899	42.3216476785	492.3704224436
127.1560382837	42.3216476785	492.2665211487
127.1560506776	42.3216476785	492.1626198539
127.1560630715	42.3216476785	492.0587185590
127.1560754653	42.3216476785	491.9548172642
127.1560878592	42.3216476785	491.8509159694
127.1561002530	42.3216476785	491.7470146744
127.1561126469	42.3216476785	491.6431108547
127.1561250407	42.3216476785	491.5392054451
127.1561374346	42.3216476785	491.4353000356
127.1561498285	42.3216476785	491.3313946260
127.1561622223	42.3216476785	491.2274892165
127.1561746162	42.3216476785	491.1235838070
127.1561870100	42.3216476785	491.0196783974
127.1561994039	42.3216476785	490.9157758203
127.1562117978	42.3216476785	490.8118745254
127.1562241916	42.3216476785	490.7079732306
127.1562365855	42.3216476785	490.6040719357
127.1562489793	42.3216476785	490.5001706409
127.1562613732	42.3216476785	490.3962693460
127.1562737670	42.3216476785	490.2923680512
127.1562861609	42.3216476785	490.1884636163
127.1562985548	42.3216476785	490.0845582067
127.1563109486	42.3216476785	489.9806527972
127.1563233425	42.3216476785	489.8767473876
127.1563357363	42.3216476785	489.7728419781
127.1563481302	42.3216476785	489.6689365685
127.1563605241	42.3216476785	489.5650311590
127.1563729179	42.3216476785	489.4611289523
127.1563853118	42.3216476785	489.3572273655
127.1563977056	42.3216476785	489.2533257786
127.1564100995	42.3216476785	489.1494241917
127.1564224933	42.3216476785	489.0455226049
127.1564348872	42.3216476785	488.9416210179
127.1564472811	42.3216476785	488.8377194311
127.1564596749	42.3216476785	488.7228275470
127.1564720688	42.3216476785	488.6068831439
127.1564844626	42.3216476785	488.4909387408
127.1564968565	42.3216476785	488.3749943375
127.1565092503	42.3216476785	488.2590499345
127.1565216442	42.3216476785	488.1431055312
127.1565340381	42.3216476785	488.0271611281
127.1565464319	42.3216476785	487.9112170132
127.1565588258	42.3216476785	487.7952729021
127.1565712196	42.3216476785	487.6793287909
127.1565836135	42.3216476785	487.5633846798
127.1555425294	42.3216567260	495.1866230625
127.1555549233	42.3216567260	495.1384357414
127.1555673171	42.3216567260	495.0902484201
127.1555797110	42.3216567260	495.0420610989
127.1555921048	42.3216567260	494.9938737777
127.1556044987	42.3216567260	494.9456864565
127.1556168926	42.3216567260	494.8974991353
127.1556292864	42.3216567260	494.8493118141
127.1556416803	42.3216567260	494.8011244929
127.1556540741	42.3216567260	494.7529371717
127.1556664680	42.3216567260	494.7047498505
127.1556788618	42.3216567260	494.6565624879
127.1556912557	42.3216567260	494.6083749942
127.1557036496	42.3216567260	494.5601875005
127.1557160434	42.3216567260	494.5120000068
127.1557284373	42.3216567260	494.4638125131
127.1557408311	42.3216567260	494.4156250194
127.1557532250	42.3216567260	494.3674375257
127.1557656188	42.3216567260	494.3017497223
127.1557780127	42.3216567260	494.1978484275
127.1557904066	42.3216567260	494.0939471326
127.1558028004	42.3216567260	493.9900458378
127.1558151943	42.3216567260	493.8861445429
127.1558275881	42.3216567260	493.7822432480
127.1558399820	42.3216567260	493.6783419531
127.1558523759	42.3216567260	493.5744390094
127.1558647697	42.3216567260	493.4705334804
127.1558771636	42.3216567260	493.3666279513
127.1558895574	42.3216567260	493.2627224223
127.1559019513	42.3216567260	493.1588168932
127.1559143451	42.3216567260	493.0549113642
127.1559267390	42.3216567260	492.9510058350
127.1559391329	42.3216567260	492.8471022714
127.1559515267	42.3216567260	492.7432009765
127.1559639206	42.3216567260	492.6392996817
127.1559763144	42.3216567260	492.5353983869
127.1559887083	42.3216567260	492.4314970919
127.1560011022	42.3216567260	492.3275957971
127.1560134960	42.3216567260	492.2236945022
127.1560258899	42.3216567260	492.1197931144
127.1560382837	42.3216567260	492.0158916470
127.1560506776	42.3216567260	491.9119901797
127.1560630715	42.3216567260	491.8080887123
127.1560754653	42.3216567260	491.7041872450
127.1560878592	42.3216567260	491.6002857777
127.1561002530	42.3216567260	491.4963843102
127.1561126469	42.3216567260	491.3924802446
127.1561250407	42.3216567260	491.2885745430
127.1561374346	42.3216567260	491.1846688415
127.1561498285	42.3216567260	491.0807631399
127.1561622223	42.3216567260	490.9768574384
127.1561746162	42.3216567260	490.8729517368
127.1561870100	42.3216567260	490.7690460352
127.1561994039	42.3216567260	490.6651433672
127.1562117978	42.3216567260	490.5612420723
127.1562241916	42.3216567260	490.4573407775
127.1562365855	42.3216567260	490.3534394825
127.1562489793	42.3216567260	490.2495381877
127.1562613732	42.3216567260	490.1456368928
127.1562737670	42.3216567260	490.0417355980
127.1562861609	42.3216567260	489.9378310720
127.1562985548	42.3216567260	489.8339255429
127.1563109486	42.3216567260	489.7300200139
127.1563233425	42.3216567260	489.6261144847
127.1563357363	42.3216567260	489.5222089557
127.1563481302	42.3216567260	489.4183034266
127.1563605241	42.3216567260	489.3143978976
127.1563729179	42.3216567260	489.2104957716
127.1563853118	42.3216567260	489.1065943043
127.1563977056	42.3216567260	489.0026928370
127.1564100995	42.3216567260	488.8987913696
127.1564224933	42.3216567260	488.7948899023
127.1564348872	42.3216567260	488.6909884348
127.1564472811	42.3216567260	488.5870869675
127.1564596749	42.3216567260	488.4732818671
127.1564720688	42.3216567260	488.3585283154
127.1564844626	42.3216567260	488.2437747637
127.1564968565	42.3216567260	488.1290212119
127.1565092503	42.3216567260	488.0142676602
127.1565216442	42.3216567260	487.8995141084
127.1565340381	42.3216567260	487.7847605567
127.1565464319	42.3216567260	487.6700070048
127.1565588258	42.3216567260	487.5552534531
127.1565712196	42.3216567260	487.4404999013
127.1565836135	42.3216567260	487.3257463496
127.1555425294	42.3216657736	494.9359906092
127.1555549233	42.3216657736	494.8878032880
127.1555673171	42.3216657736	494.8396159668
127.1555797110	42.3216657736	494.7914286456
127.1555921048	42.3216657736	494.7432413244
127.1556044987	42.3216657736	494.6950540032
127.1556168926	42.3216657736	494.6468666820
127.1556292864	42.3216657736	494.5986793608
127.1556416803	42.3216657736	494.5504920396
127.1556540741	42.3216657736	494.5023047184
127.1556664680	42.3216657736	494.4541173972
127.1556788618	42.3216657736	494.4059299231
127.1556912557	42.3216657736	494.3577419649
127.1557036496	42.3216657736	494.3095540067
127.1557160434	42.3216657736	494.2613660485
127.1557284373	42.3216657736	494.2131780902
127.1557408311	42.3216657736	494.1649901320
127.1557532250	42.3216657736	494.1168021738
127.1557656188	42.3216657736	494.0511172690
127.1557780127	42.3216657736	493.9472159742
127.1557904066	42.3216657736	493.8433146792
127.1558028004	42.3216657736	493.7394133844
127.1558151943	42.3216657736	493.6355120895
127.1558275881	42.3216657736	493.5316107947
127.1558399820	42.3216657736	493.4277094998
127.1558523759	42.3216657736	493.3238067370
127.1558647697	42.3216657736	493.2199016725
127.1558771636	42.3216657736	493.1159966079
127.1558895574	42.3216657736	493.0120915434
127.1559019513	42.3216657736	492.9081864788
127.1559143451	42.3216657736	492.8042814143
127.1559267390	42.3216657736	492.7003763497
127.1559391329	42.3216657736	492.5964730350
127.1559515267	42.3216657736	492.4925717400
127.1559639206	42.3216657736	492.3886704452
127.1559763144	42.3216657736	492.2847691504
127.1559887083	42.3216657736	492.1808678555
127.1560011022	42.3216657736	492.0769665607
127.1560134960	42.3216657736	491.9730652658
127.1560258899	42.3216657736	491.8691636277
127.1560382837	42.3216657736	491.7652616957
127.1560506776	42.3216657736	491.6613597639
127.1560630715	42.3216657736	491.5574578320
127.1560754653	42.3216657736	491.4535559001
127.1560878592	42.3216657736	491.3496539683
127.1561002530	42.3216657736	491.2457520364
127.1561126469	42.3216657736	491.1418477913
127.1561250407	42.3216657736	491.0379420897
127.1561374346	42.3216657736	490.9340363882
127.1561498285	42.3216657736	490.8301306865
127.1561622223	42.3216657736	490.7262249850
127.1561746162	42.3216657736	490.6223192835
127.1561870100	42.3216657736	490.5184135819
127.1561994039	42.3216657736	490.4145109139
127.1562117978	42.3216657736	490.3106096189
127.1562241916	42.3216657736	490.2067083241
127.1562365855	42.3216657736	490.1028070292
127.1562489793	42.3216657736	489.9989057344
127.1562613732	42.3216657736	489.8950044395
127.1562737670	42.3216657736	489.7911031447
127.1562861609	42.3216657736	489.6871989731
127.1562985548	42.3216657736	489.5832939085
127.1563109486	42.3216657736	489.4793888440
127.1563233425	42.3216657736	489.3754837794
127.1563357363	42.3216657736	489.2715787150
127.1563481302	42.3216657736	489.1676736503
127.1563605241	42.3216657736	489.0637685859
127.1563729179	42.3216657736	488.9598661460
127.1563853118	42.3216657736	488.8559642142
127.1563977056	42.3216657736	488.7520622823
127.1564100995	42.3216657736	488.6481603504
127.1564224933	42.3216657736	488.5442584186
127.1564348872	42.3216657736	488.4403564866
127.1564472811	42.3216657736	488.3364545548
127.1564596749	42.3216657736	488.2237359205
127.1564720688	42.3216657736	488.1101729282
127.1564844626	42.3216657736	487.9966099359
127.1564968565	42.3216657736	487.8830469435
127.1565092503	42.3216657736	487.7694839512
127.1565216442	42.3216657736	487.6559209587
127.1565340381	42.3216657736	487.5423579664
127.1565464319	42.3216657736	487.4287949740
127.1565588258	42.3216657736	487.3152319817
127.1565712196	42.3216657736	487.2016689893
127.1565836135	42.3216657736	487.0881059970
127.1555425294	42.3216748211	494.6853581560
127.1555549233	42.3216748211	494.6371708349
127.1555673171	42.3216748211	494.5889835136
127.1555797110	42.3216748211	494.5407961925
127.1555921048	42.3216748211	494.4926088712
127.1556044987	42.3216748211	494.4444215501
127.1556168926	42.3216748211	494.3962342288
127.1556292864	42.3216748211	494.3480469076
127.1556416803	42.3216748211	494.2998595864
127.1556540741	42.3216748211	494.2516722652
127.1556664680	42.3216748211	494.2034849441
127.1556788618	42.3216748211	494.1552973585
127.1556912557	42.3216748211	494.1071089358
127.1557036496	42.3216748211	494.0589205130
127.1557160434	42.3216748211	494.0107320903
127.1557284373	42.3216748211	493.9625436676
127.1557408311	42.3216748211	493.9143552448
127.1557532250	42.3216748211	493.8661668221
127.1557656188	42.3216748211	493.8004848158
127.1557780127	42.3216748211	493.6965835210
127.1557904066	42.3216748211	493.5926822261
127.1558028004	42.3216748211	493.4887809313
127.1558151943	42.3216748211	493.3848796364
127.1558275881	42.3216748211	493.2809783416
127.1558399820	42.3216748211	493.1770770466
127.1558523759	42.3216748211	493.0731744647
127.1558647697	42.3216748211	492.9692698648
127.1558771636	42.3216748211	492.8653652647
127.1558895574	42.3216748211	492.7614606647
127.1559019513	42.3216748211	492.6575560646
127.1559143451	42.3216748211	492.5536514646
127.1559267390	42.3216748211	492.4497468646
127.1559391329	42.3216748211	492.3458437987
127.1559515267	42.3216748211	492.2419425038
127.1559639206	42.3216748211	492.1380412090
127.1559763144	42.3216748211	492.0341399142
127.1559887083	42.3216748211	491.9302386193
127.1560011022	42.3216748211	491.8263373245
127.1560134960	42.3216748211	491.7224360295
127.1560258899	42.3216748211	491.6185341411
127.1560382837	42.3216748211	491.5146317446
127.1560506776	42.3216748211	491.4107293483
127.1560630715	42.3216748211	491.3068269518
127.1560754653	42.3216748211	491.2029245555
127.1560878592	42.3216748211	491.0990221591
127.1561002530	42.3216748211	490.9951197627
127.1561126469	42.3216748211	490.8912153381
127.1561250407	42.3216748211	490.7873096365
127.1561374346	42.3216748211	490.6834039350
127.1561498285	42.3216748211	490.5794982334
127.1561622223	42.3216748211	490.4755925319
127.1561746162	42.3216748211	490.3716868304
127.1561870100	42.3216748211	490.2677811287
127.1561994039	42.3216748211	490.1638784607
127.1562117978	42.3216748211	490.0599771658
127.1562241916	42.3216748211	489.9560758710
127.1562365855	42.3216748211	489.8521745761
127.1562489793	42.3216748211	489.7482732813
127.1562613732	42.3216748211	489.6443719863
127.1562737670	42.3216748211	489.5404706915
127.1562861609	42.3216748211	489.4365668745
127.1562985548	42.3216748211	489.3326622744
127.1563109486	42.3216748211	489.2287576744
127.1563233425	42.3216748211	489.1248530743
127.1563357363	42.3216748211	489.0209484744
127.1563481302	42.3216748211	488.9170438743
127.1563605241	42.3216748211	488.8131392743
127.1563729179	42.3216748211	488.7092365205
127.1563853118	42.3216748211	488.6053341242
127.1563977056	42.3216748211	488.5014317279
127.1564100995	42.3216748211	488.3975293314
127.1564224933	42.3216748211	488.2936269351
127.1564348872	42.3216748211	488.1897245386
127.1564472811	42.3216748211	488.0858221422
127.1564596749	42.3216748211	487.9741899742
127.1564720688	42.3216748211	487.8618175413
127.1564844626	42.3216748211	487.7494451083
127.1564968565	42.3216748211	487.6370726753
127.1565092503	42.3216748211	487.5247002424
127.1565216442	42.3216748211	487.4123278093
127.1565340381	42.3216748211	487.2999553764
127.1565464319	42.3216748211	487.1875829434
127.1565588258	42.3216748211	487.0752105104
127.1565712196	42.3216748211	486.9628380774
127.1565836135	42.3216748211	486.8504656445
127.1555425294	42.3216838687	494.4347257027
127.1555549233	42.3216838687	494.3865383815
127.1555673171	42.3216838687	494.3383510603
127.1555797110	42.3216838687	494.2901637391
127.1555921048	42.3216838687	494.2419764179
127.1556044987	42.3216838687	494.1937890967
127.1556168926	42.3216838687	494.1456017755
127.1556292864	42.3216838687	494.0974144543
127.1556416803	42.3216838687	494.0492271331
127.1556540741	42.3216838687	494.0010398119
127.1556664680	42.3216838687	493.9528524907
127.1556788618	42.3216838687	493.9046647937
127.1556912557	42.3216838687	493.8564759065
127.1557036496	42.3216838687	493.8082870192
127.1557160434	42.3216838687	493.7600981320
127.1557284373	42.3216838687	493.7119092447
127.1557408311	42.3216838687	493.6637203574
127.1557532250	42.3216838687	493.6155314702
127.1557656188	42.3216838687	493.5498523625
127.1557780127	42.3216838687	493.4459510677
127.1557904066	42.3216838687	493.3420497728
127.1558028004	42.3216838687	493.2381484780
127.1558151943	42.3216838687	493.1342471830
127.1558275881	42.3216838687	493.0303458882
127.1558399820	42.3216838687	492.9264445933
127.1558523759	42.3216838687	492.8225421923
127.1558647697	42.3216838687	492.7186380568
127.1558771636	42.3216838687	492.6147339213
127.1558895574	42.3216838687	492.5108297858
127.1559019513	42.3216838687	492.4069256502
127.1559143451	42.3216838687	492.3030215148
127.1559267390	42.3216838687	492.1991173792
127.1559391329	42.3216838687	492.0952145623
127.1559515267	42.3216838687	491.9913132674
127.1559639206	42.3216838687	491.8874119726
127.1559763144	42.3216838687	491.7835106778
127.1559887083	42.3216838687	491.6796093828
127.1560011022	42.3216838687	491.5757080880
127.1560134960	42.3216838687	491.4718067931
127.1560258899	42.3216838687	491.3679046543
127.1560382837	42.3216838687	491.2640017934
127.1560506776	42.3216838687	491.1600989325
127.1560630715	42.3216838687	491.0561960715
127.1560754653	42.3216838687	490.9522932107
127.1560878592	42.3216838687	490.8483903498
127.1561002530	42.3216838687	490.7444874888
127.1561126469	42.3216838687	490.6405828848
127.1561250407	42.3216838687	490.5366771832
127.1561374346	42.3216838687	490.4327714817
127.1561498285	42.3216838687	490.3288657800
127.1561622223	42.3216838687	490.2249600785
127.1561746162	42.3216838687	490.1210543770
127.1561870100	42.3216838687	490.0171486754
127.1561994039	42.3216838687	489.9132460074
127.1562117978	42.3216838687	489.8093447125
127.1562241916	42.3216838687	489.7054434176
127.1562365855	42.3216838687	489.6015421227
127.1562489793	42.3216838687	489.4976408279
127.1562613732	42.3216838687	489.3937395330
127.1562737670	42.3216838687	489.2898382382
127.1562861609	42.3216838687	489.1859347756
127.1562985548	42.3216838687	489.0820306401
127.1563109486	42.3216838687	488.9781265046
127.1563233425	42.3216838687	488.8742223690
127.1563357363	42.3216838687	488.7703182336
127.1563481302	42.3216838687	488.6664140980
127.1563605241	42.3216838687	488.5625099626
127.1563729179	42.3216838687	488.4586068949
127.1563853118	42.3216838687	488.3547040341
127.1563977056	42.3216838687	488.2508011732
127.1564100995	42.3216838687	488.1468983122
127.1564224933	42.3216838687	488.0429954513
127.1564348872	42.3216838687	487.9390925904
127.1564472811	42.3216838687	487.8351897295
127.1564596749	42.3216838687	487.7246440276
127.1564720688	42.3216838687	487.6134621541
127.1564844626	42.3216838687	487.5022802805
127.1564968565	42.3216838687	487.3910984069
127.1565092503	42.3216838687	487.2799165334
127.1565216442	42.3216838687	487.1687346597
127.1565340381	42.3216838687	487.0575527862
127.1565464319	42.3216838687	486.9463709125
127.1565588258	42.3216838687	486.8351890390
127.1565712196	42.3216838687	486.7240071653
127.1565836135	42.3216838687	486.6128252918
127.1555425294	42.3216929162	494.1840932496
127.1555549233	42.3216929162	494.1359059284
127.1555673171	42.3216929162	494.0877186072
127.1555797110	42.3216929162	494.0395312860
127.1555921048	42.3216929162	493.9913439647
127.1556044987	42.3216929162	493.9431566436
127.1556168926	42.3216929162	493.8949693223
127.1556292864	42.3216929162	493.8467820012
127.1556416803	42.3216929162	493.7985946799
127.1556540741	42.3216929162	493.7504073588
127.1556664680	42.3216929162	493.7022200376
127.1556788618	42.3216929162	493.6540322291
127.1556912557	42.3216929162	493.6058428774
127.1557036496	42.3216929162	493.5576535256
127.1557160434	42.3216929162	493.5094641738
127.1557284373	42.3216929162	493.4612748220
127.1557408311	42.3216929162	493.4130854703
127.1557532250	42.3216929162	493.3648961185
127.1557656188	42.3216929162	493.2992199093
127.1557780127	42.3216929162	493.1953186145
127.1557904066	42.3216929162	493.0914173196
127.1558028004	42.3216929162	492.9875160248
127.1558151943	42.3216929162	492.8836147299
127.1558275881	42.3216929162	492.7797134351
127.1558399820	42.3216929162	492.6758121402
127.1558523759	42.3216929162	492.5719099200
127.1558647697	42.3216929162	492.4680062491
127.1558771636	42.3216929162	492.3641025781
127.1558895574	42.3216929162	492.2601989071
127.1559019513	42.3216929162	492.1562952361
127.1559143451	42.3216929162	492.0523915651
127.1559267390	42.3216929162	491.9484878941
127.1559391329	42.3216929162	491.8445853260
127.1559515267	42.3216929162	491.7406840311
127.1559639206	42.3216929162	491.6367827363
127.1559763144	42.3216929162	491.5328814415
127.1559887083	42.3216929162	491.4289801466
127.1560011022	42.3216929162	491.3250788518
127.1560134960	42.3216929162	491.2211775569
127.1560258899	42.3216929162	491.1172751678
127.1560382837	42.3216929162	491.0133718423
127.1560506776	42.3216929162	490.9094685169
127.1560630715	42.3216929162	490.8055651914
127.1560754653	42.3216929162	490.7016618660
127.1560878592	42.3216929162	490.5977585406
127.1561002530	42.3216929162	490.4938552151
127.1561126469	42.3216929162	490.3899504317
127.1561250407	42.3216929162	490.2860447300
127.1561374346	42.3216929162	490.1821390285
127.1561498285	42.3216929162	490.0782333269
127.1561622223	42.3216929162	489.9743276254
127.1561746162	42.3216929162	489.8704219239
127.1561870100	42.3216929162	489.7665162222
127.1561994039	42.3216929162	489.6626135542
127.1562117978	42.3216929162	489.5587122593
127.1562241916	42.3216929162	489.4548109645
127.1562365855	42.3216929162	489.3509096696
127.1562489793	42.3216929162	489.2470083748
127.1562613732	42.3216929162	489.1431070798
127.1562737670	42.3216929162	489.0392057850
127.1562861609	42.3216929162	488.9353026770
127.1562985548	42.3216929162	488.8313990059
127.1563109486	42.3216929162	488.7274953350
127.1563233425	42.3216929162	488.6235916639
127.1563357363	42.3216929162	488.5196879930
127.1563481302	42.3216929162	488.4157843219
127.1563605241	42.3216929162	488.3118806510
127.1563729179	42.3216929162	488.2079772695
127.1563853118	42.3216929162	488.1040739441
127.1563977056	42.3216929162	488.0001706187
127.1564100995	42.3216929162	487.8962672932
127.1564224933	42.3216929162	487.7923639678
127.1564348872	42.3216929162	487.6884606423
127.1564472811	42.3216929162	487.5845573170
127.1564596749	42.3216929162	487.4750980812
127.1564720688	42.3216929162	487.3651067671
127.1564844626	42.3216929162	487.2551154530
127.1564968565	42.3216929162	487.1451241387
127.1565092503	42.3216929162	487.0351328245
127.1565216442	42.3216929162	486.9251415103
127.1565340381	42.3216929162	486.8151501961
127.1565464319	42.3216929162	486.7051588819
127.1565588258	42.3216929162	486.5951675677
127.1565712196	42.3216929162	486.4851762535
127.1565836135	42.3216929162	486.3751849393
127.1555425294	42.3217019638	493.9334607962
127.1555549233	42.3217019638	493.8852734750
127.1555673171	42.3217019638	493.8370861538
127.1555797110	42.3217019638	493.7888988326
127.1555921048	42.3217019638	493.7407115114
127.1556044987	42.3217019638	493.6925241902
127.1556168926	42.3217019638	493.6443368690
127.1556292864	42.3217019638	493.5961495478
127.1556416803	42.3217019638	493.5479622266
127.1556540741	42.3217019638	493.4997749054
127.1556664680	42.3217019638	493.4515875842
127.1556788618	42.3217019638	493.4033996643
127.1556912557	42.3217019638	493.3552098481
127.1557036496	42.3217019638	493.3070200317
127.1557160434	42.3217019638	493.2588302155
127.1557284373	42.3217019638	493.2106403991
127.1557408311	42.3217019638	493.1624505829
127.1557532250	42.3217019638	493.1142607666
127.1557656188	42.3217019638	493.0485874560
127.1557780127	42.3217019638	492.9446861612
127.1557904066	42.3217019638	492.8407848663
127.1558028004	42.3217019638	492.7368835715
127.1558151943	42.3217019638	492.6329822765
127.1558275881	42.3217019638	492.5290809817
127.1558399820	42.3217019638	492.4251796868
127.1558523759	42.3217019638	492.3212776476
127.1558647697	42.3217019638	492.2173744412
127.1558771636	42.3217019638	492.1134712346
127.1558895574	42.3217019638	492.0095680282
127.1559019513	42.3217019638	491.9056648217
127.1559143451	42.3217019638	491.8017616153
127.1559267390	42.3217019638	491.6978584087
127.1559391329	42.3217019638	491.5939560896
127.1559515267	42.3217019638	491.4900547947
127.1559639206	42.3217019638	491.3861534999
127.1559763144	42.3217019638	491.2822522051
127.1559887083	42.3217019638	491.1783509102
127.1560011022	42.3217019638	491.0744496154
127.1560134960	42.3217019638	490.9705483204
127.1560258899	42.3217019638	490.8666456810
127.1560382837	42.3217019638	490.7627418910
127.1560506776	42.3217019638	490.6588381011
127.1560630715	42.3217019638	490.5549343111
127.1560754653	42.3217019638	490.4510305212
127.1560878592	42.3217019638	490.3471267313
127.1561002530	42.3217019638	490.2432229413
127.1561126469	42.3217019638	490.1393179783
127.1561250407	42.3217019638	490.0354122767
127.1561374346	42.3217019638	489.9315065752
127.1561498285	42.3217019638	489.8276008736
127.1561622223	42.3217019638	489.7236951720
127.1561746162	42.3217019638	489.6197894705
127.1561870100	42.3217019638	489.5158837689
127.1561994039	42.3217019638	489.4119811009
127.1562117978	42.3217019638	489.3080798060
127.1562241916	42.3217019638	489.2041785112
127.1562365855	42.3217019638	489.1002772162
127.1562489793	42.3217019638	488.9963759214
127.1562613732	42.3217019638	488.8924746265
127.1562737670	42.3217019638	488.7885733317
127.1562861609	42.3217019638	488.6846705781
127.1562985548	42.3217019638	488.5807673716
127.1563109486	42.3217019638	488.4768641652
127.1563233425	42.3217019638	488.3729609586
127.1563357363	42.3217019638	488.2690577522
127.1563481302	42.3217019638	488.1651545457
127.1563605241	42.3217019638	488.0612513393
127.1563729179	42.3217019638	487.9573476438
127.1563853118	42.3217019638	487.8534438539
127.1563977056	42.3217019638	487.7495400640
127.1564100995	42.3217019638	487.6456362740
127.1564224933	42.3217019638	487.5417324841
127.1564348872	42.3217019638	487.4378286941
127.1564472811	42.3217019638	487.3339249042
127.1564596749	42.3217019638	487.2255521347
127.1564720688	42.3217019638	487.1167513799
127.1564844626	42.3217019638	487.0079506252
127.1564968565	42.3217019638	486.8991498703
127.1565092503	42.3217019638	486.7903491155
127.1565216442	42.3217019638	486.6815483607
127.1565340381	42.3217019638	486.5727476059
127.1565464319	42.3217019638	486.4639468510
127.1565588258	42.3217019638	486.3551460963
127.1565712196	42.3217019638	486.2463453414
127.1565836135	42.3217019638	486.1375445866
127.1555425294	42.3217110113	493.6828283429
127.1555549233	42.3217110113	493.6346410217
127.1555673171	42.3217110113	493.5864537005
127.1555797110	42.3217110113	493.5382663793
127.1555921048	42.3217110113	493.4900790581
127.1556044987	42.3217110113	493.4418917369
127.1556168926	42.3217110113	493.3937044157
127.1556292864	42.3217110113	493.3455170945
127.1556416803	42.3217110113	493.2973297732
127.1556540741	42.3217110113	493.2491424521
127.1556664680	42.3217110113	493.2009551309
127.1556788618	42.3217110113	493.1527670995
127.1556912557	42.3217110113	493.1045768187
127.1557036496	42.3217110113	493.0563865379
127.1557160434	42.3217110113	493.0081962571
127.1557284373	42.3217110113	492.9600059763
127.1557408311	42.3217110113	492.9118156955
127.1557532250	42.3217110113	492.8636254147
127.1557656188	42.3217110113	492.7979550027
127.1557780127	42.3217110113	492.6940537079
127.1557904066	42.3217110113	492.5901524129
127.1558028004	42.3217110113	492.4862511181
127.1558151943	42.3217110113	492.3823498232
127.1558275881	42.3217110113	492.2784485284
127.1558399820	42.3217110113	492.1745472335
127.1558523759	42.3217110113	492.0706453751
127.1558647697	42.3217110113	491.9667426332
127.1558771636	42.3217110113	491.8628398912
127.1558895574	42.3217110113	491.7589371493
127.1559019513	42.3217110113	491.6550344073
127.1559143451	42.3217110113	491.5511316654
127.1559267390	42.3217110113	491.4472289234
127.1559391329	42.3217110113	491.3433268532
127.1559515267	42.3217110113	491.2394255583
127.1559639206	42.3217110113	491.1355242635
127.1559763144	42.3217110113	491.0316229686
127.1559887083	42.3217110113	490.9277216737
127.1560011022	42.3217110113	490.8238203789
127.1560134960	42.3217110113	490.7199190840
127.1560258899	42.3217110113	490.6160161943
127.1560382837	42.3217110113	490.5121119397
127.1560506776	42.3217110113	490.4082076853
127.1560630715	42.3217110113	490.3043034308
127.1560754653	42.3217110113	490.2003991763
127.1560878592	42.3217110113	490.0964949219
127.1561002530	42.3217110113	489.9925906674
127.1561126469	42.3217110113	489.8886855250
127.1561250407	42.3217110113	489.7847798234
127.1561374346	42.3217110113	489.6808741218
127.1561498285	42.3217110113	489.5769684202
127.1561622223	42.3217110113	489.4730627187
127.1561746162	42.3217110113	489.3691570172
127.1561870100	42.3217110113	489.2652513156
127.1561994039	42.3217110113	489.1613486475
127.1562117978	42.3217110113	489.0574473526
127.1562241916	42.3217110113	488.9535460578
127.1562365855	42.3217110113	488.8496447629
127.1562489793	42.3217110113	488.7457434681
127.1562613732	42.3217110113	488.6418421732
127.1562737670	42.3217110113	488.5379408784
127.1562861609	42.3217110113	488.4340384793
127.1562985548	42.3217110113	488.3301357372
127.1563109486	42.3217110113	488.2262329953
127.1563233425	42.3217110113	488.1223302533
127.1563357363	42.3217110113	488.0184275114
127.1563481302	42.3217110113	487.9145247694
127.1563605241	42.3217110113	487.8106220275
127.1563729179	42.3217110113	487.7067180182
127.1563853118	42.3217110113	487.6028137638
127.1563977056	42.3217110113	487.4989095094
127.1564100995	42.3217110113	487.3950052548
127.1564224933	42.3217110113	487.2911010004
127.1564348872	42.3217110113	487.1871967459
127.1564472811	42.3217110113	487.0832924915
127.1564596749	42.3217110113	486.9760061881
127.1564720688	42.3217110113	486.8683959928
127.1564844626	42.3217110113	486.7607857974
127.1564968565	42.3217110113	486.6531756019
127.1565092503	42.3217110113	486.5455654065
127.1565216442	42.3217110113	486.4379552110
127.1565340381	42.3217110113	486.3303450157
127.1565464319	42.3217110113	486.2227348202
127.1565588258	42.3217110113	486.1151246248
127.1565712196	42.3217110113	486.0075144293
127.1565836135	42.3217110113	485.8999042340
127.1555425294	42.3217200589	493.4321958897
127.1555549233	42.3217200589	493.3840085686
127.1555673171	42.3217200589	493.3358212473
127.1555797110	42.3217200589	493.2876339262
127.1555921048	42.3217200589	493.2394466049
127.1556044987	42.3217200589	493.1912592837
127.1556168926	42.3217200589	493.1430719625
127.1556292864	42.3217200589	493.0948846413
127.1556416803	42.3217200589	493.0466973201
127.1556540741	42.3217200589	492.9985099989
127.1556664680	42.3217200589	492.9503226778
127.1556788618	42.3217200589	492.9021345349
127.1556912557	42.3217200589	492.8539437896
127.1557036496	42.3217200589	492.8057530443
127.1557160434	42.3217200589	492.7575622990
127.1557284373	42.3217200589	492.7093715536
127.1557408311	42.3217200589	492.6611808083
127.1557532250	42.3217200589	492.6129900630
127.1557656188	42.3217200589	492.5473225495
127.1557780127	42.3217200589	492.4434212547
127.1557904066	42.3217200589	492.3395199598
127.1558028004	42.3217200589	492.2356186650
127.1558151943	42.3217200589	492.1317173701
127.1558275881	42.3217200589	492.0278160753
127.1558399820	42.3217200589	491.9239147803
127.1558523759	42.3217200589	491.8200131029
127.1558647697	42.3217200589	491.7161108255
127.1558771636	42.3217200589	491.6122085480
127.1558895574	42.3217200589	491.5083062706
127.1559019513	42.3217200589	491.4044039931
127.1559143451	42.3217200589	491.3005017158
127.1559267390	42.3217200589	491.1965994383
127.1559391329	42.3217200589	491.0926976169
127.1559515267	42.3217200589	490.9887963220
127.1559639206	42.3217200589	490.8848950272
127.1559763144	42.3217200589	490.7809937324
127.1559887083	42.3217200589	490.6770924375
127.1560011022	42.3217200589	490.5731911427
127.1560134960	42.3217200589	490.4692898478
127.1560258899	42.3217200589	490.3653867077
127.1560382837	42.3217200589	490.2614819886
127.1560506776	42.3217200589	490.1575772697
127.1560630715	42.3217200589	490.0536725506
127.1560754653	42.3217200589	489.9497678317
127.1560878592	42.3217200589	489.8458631128
127.1561002530	42.3217200589	489.7419583937
127.1561126469	42.3217200589	489.6380530718
127.1561250407	42.3217200589	489.5341473702
127.1561374346	42.3217200589	489.4302416687
127.1561498285	42.3217200589	489.3263359671
127.1561622223	42.3217200589	489.2224302656
127.1561746162	42.3217200589	489.1185245641
127.1561870100	42.3217200589	489.0146188624
127.1561994039	42.3217200589	488.9107161944
127.1562117978	42.3217200589	488.8068148995
127.1562241916	42.3217200589	488.7029136047
127.1562365855	42.3217200589	488.5990123098
127.1562489793	42.3217200589	488.4951110149
127.1562613732	42.3217200589	488.3912097200
127.1562737670	42.3217200589	488.2873084252
127.1562861609	42.3217200589	488.1834063806
127.1562985548	42.3217200589	488.0795041031
127.1563109486	42.3217200589	487.9756018257
127.1563233425	42.3217200589	487.8716995482
127.1563357363	42.3217200589	487.7677972708
127.1563481302	42.3217200589	487.6638949933
127.1563605241	42.3217200589	487.5599927160
127.1563729179	42.3217200589	487.4560883928
127.1563853118	42.3217200589	487.3521836738
127.1563977056	42.3217200589	487.2482789549
127.1564100995	42.3217200589	487.1443742358
127.1564224933	42.3217200589	487.0404695169
127.1564348872	42.3217200589	486.9365647979
127.1564472811	42.3217200589	486.8326600789
127.1564596749	42.3217200589	486.7264602418
127.1564720688	42.3217200589	486.6200406058
127.1564844626	42.3217200589	486.5136209698
127.1564968565	42.3217200589	486.4072013337
127.1565092503	42.3217200589	486.3007816977
127.1565216442	42.3217200589	486.1943620616
127.1565340381	42.3217200589	486.0879424256
127.1565464319	42.3217200589	485.9815227895
127.1565588258	42.3217200589	485.8751031536
127.1565712196	42.3217200589	485.7686835175
127.1565836135	42.3217200589	485.6622638815
127.1555425294	42.3217291064	493.1815634364
127.1555549233	42.3217291064	493.1333761152
127.1555673171	42.3217291064	493.0851887940
127.1555797110	42.3217291064	493.0370014728
127.1555921048	42.3217291064	492.9888141516
127.1556044987	42.3217291064	492.9406268304
127.1556168926	42.3217291064	492.8924395092
127.1556292864	42.3217291064	492.8442521880
127.1556416803	42.3217291064	492.7960648668
127.1556540741	42.3217291064	492.7478775456
127.1556664680	42.3217291064	492.6996902244
127.1556788618	42.3217291064	492.6515019701
127.1556912557	42.3217291064	492.6033107603
127.1557036496	42.3217291064	492.5551195504
127.1557160434	42.3217291064	492.5069283406
127.1557284373	42.3217291064	492.4587371307
127.1557408311	42.3217291064	492.4105459209
127.1557532250	42.3217291064	492.3623547111
127.1557656188	42.3217291064	492.2966900962
127.1557780127	42.3217291064	492.1927888014
127.1557904066	42.3217291064	492.0888875064
127.1558028004	42.3217291064	491.9849862116
127.1558151943	42.3217291064	491.8810849167
127.1558275881	42.3217291064	491.7771836219
127.1558399820	42.3217291064	491.6732823270
127.1558523759	42.3217291064	491.5693808304
127.1558647697	42.3217291064	491.4654790176
127.1558771636	42.3217291064	491.3615772046
127.1558895574	42.3217291064	491.2576753917
127.1559019513	42.3217291064	491.1537735788
127.1559143451	42.3217291064	491.0498717659
127.1559267390	42.3217291064	490.9459699529
127.1559391329	42.3217291064	490.8420683805
127.1559515267	42.3217291064	490.7381670856
127.1559639206	42.3217291064	490.6342657908
127.1559763144	42.3217291064	490.5303644960
127.1559887083	42.3217291064	490.4264632011
127.1560011022	42.3217291064	490.3225619062
127.1560134960	42.3217291064	490.2186606113
127.1560258899	42.3217291064	490.1147572209
127.1560382837	42.3217291064	490.0108520374
127.1560506776	42.3217291064	489.9069468539
127.1560630715	42.3217291064	489.8030416703
127.1560754653	42.3217291064	489.6991364869
127.1560878592	42.3217291064	489.5952313034
127.1561002530	42.3217291064	489.4913261199
127.1561126469	42.3217291064	489.3874206185
127.1561250407	42.3217291064	489.2835149169
127.1561374346	42.3217291064	489.1796092154
127.1561498285	42.3217291064	489.0757035137
127.1561622223	42.3217291064	488.9717978122
127.1561746162	42.3217291064	488.8678921107
127.1561870100	42.3217291064	488.7639864091
127.1561994039	42.3217291064	488.6600837411
127.1562117978	42.3217291064	488.5561824461
127.1562241916	42.3217291064	488.4522811513
127.1562365855	42.3217291064	488.3483798564
127.1562489793	42.3217291064	488.2444785616
127.1562613732	42.3217291064	488.1405772667
127.1562737670	42.3217291064	488.0366759719
127.1562861609	42.3217291064	487.9327742817
127.1562985548	42.3217291064	487.8288724688
127.1563109486	42.3217291064	487.7249706559
127.1563233425	42.3217291064	487.6210688429
127.1563357363	42.3217291064	487.5171670300
127.1563481302	42.3217291064	487.4132652171
127.1563605241	42.3217291064	487.3093634042
127.1563729179	42.3217291064	487.2054587671
127.1563853118	42.3217291064	487.1015535837
127.1563977056	42.3217291064	486.9976484002
127.1564100995	42.3217291064	486.8937432167
127.1564224933	42.3217291064	486.7898380332
127.1564348872	42.3217291064	486.6859328496
127.1564472811	42.3217291064	486.5820276662
127.1564596749	42.3217291064	486.4769142952
127.1564720688	42.3217291064	486.3716852186
127.1564844626	42.3217291064	486.2664561420
127.1564968565	42.3217291064	486.1612270653
127.1565092503	42.3217291064	486.0559979887
127.1565216442	42.3217291064	485.9507689120
127.1565340381	42.3217291064	485.8455398354
127.1565464319	42.3217291064	485.7403107587
127.1565588258	42.3217291064	485.6350816821
127.1565712196	42.3217291064	485.5298526054
127.1565836135	42.3217291064	485.4246235288
127.1555425294	42.3217381540	492.9309309832
127.1555549233	42.3217381540	492.8827436621
127.1555673171	42.3217381540	492.8345563408
127.1555797110	42.3217381540	492.7863690197
127.1555921048	42.3217381540	492.7381816984
127.1556044987	42.3217381540	492.6899943773
127.1556168926	42.3217381540	492.6418070560
127.1556292864	42.3217381540	492.5936197349
127.1556416803	42.3217381540	492.5454324136
127.1556540741	42.3217381540	492.4972450924
127.1556664680	42.3217381540	492.4490577713
127.1556788618	42.3217381540	492.4008694055
127.1556912557	42.3217381540	492.3526777312
127.1557036496	42.3217381540	492.3044860568
127.1557160434	42.3217381540	492.2562943825
127.1557284373	42.3217381540	492.2081027081
127.1557408311	42.3217381540	492.1599110337
127.1557532250	42.3217381540	492.1117193594
127.1557656188	42.3217381540	492.0460576430
127.1557780127	42.3217381540	491.9421563482
127.1557904066	42.3217381540	491.8382550533
127.1558028004	42.3217381540	491.7343537585
127.1558151943	42.3217381540	491.6304524636
127.1558275881	42.3217381540	491.5265511688
127.1558399820	42.3217381540	491.4226498738
127.1558523759	42.3217381540	491.3187485582
127.1558647697	42.3217381540	491.2148472098
127.1558771636	42.3217381540	491.1109458614
127.1558895574	42.3217381540	491.0070445130
127.1559019513	42.3217381540	490.9031431646
127.1559143451	42.3217381540	490.7992418162
127.1559267390	42.3217381540	490.6953404678
127.1559391329	42.3217381540	490.5914391443
127.1559515267	42.3217381540	490.4875378493
127.1559639206	42.3217381540	490.3836365545
127.1559763144	42.3217381540	490.2797352597
127.1559887083	42.3217381540	490.1758339648
127.1560011022	42.3217381540	490.0719326700
127.1560134960	42.3217381540	489.9680313751
127.1560258899	42.3217381540	489.8641277344
127.1560382837	42.3217381540	489.7602220863
127.1560506776	42.3217381540	489.6563164383
127.1560630715	42.3217381540	489.5524107902
127.1560754653	42.3217381540	489.4485051422
127.1560878592	42.3217381540	489.3445994943
127.1561002530	42.3217381540	489.2406938462
127.1561126469	42.3217381540	489.1367881654
127.1561250407	42.3217381540	489.0328824637
127.1561374346	42.3217381540	488.9289767622
127.1561498285	42.3217381540	488.8250710606
127.1561622223	42.3217381540	488.7211653591
127.1561746162	42.3217381540	488.6172596576
127.1561870100	42.3217381540	488.5133539559
127.1561994039	42.3217381540	488.4094512879
127.1562117978	42.3217381540	488.3055499930
127.1562241916	42.3217381540	488.2016486982
127.1562365855	42.3217381540	488.0977474033
127.1562489793	42.3217381540	487.9938461085
127.1562613732	42.3217381540	487.8899448135
127.1562737670	42.3217381540	487.7860435187
127.1562861609	42.3217381540	487.6821421831
127.1562985548	42.3217381540	487.5782408346
127.1563109486	42.3217381540	487.4743394863
127.1563233425	42.3217381540	487.3704381378
127.1563357363	42.3217381540	487.2665367895
127.1563481302	42.3217381540	487.1626354410
127.1563605241	42.3217381540	487.0587340926
127.1563729179	42.3217381540	486.9548291417
127.1563853118	42.3217381540	486.8509234937
127.1563977056	42.3217381540	486.7470178458
127.1564100995	42.3217381540	486.6431121977
127.1564224933	42.3217381540	486.5392065497
127.1564348872	42.3217381540	486.4353009016
127.1564472811	42.3217381540	486.3313952536
127.1564596749	42.3217381540	486.2273683488
127.1564720688	42.3217381540	486.1233298316
127.1564844626	42.3217381540	486.0192913144
127.1564968565	42.3217381540	485.9152527971
127.1565092503	42.3217381540	485.8112142799
127.1565216442	42.3217381540	485.7071757626
127.1565340381	42.3217381540	485.6031372454
127.1565464319	42.3217381540	485.4990987281
127.1565588258	42.3217381540	485.3950602109
127.1565712196	42.3217381540	485.2910216935
127.1565836135	42.3217381540	485.1869831763
127.1555425294	42.3217472015	492.6967253777
127.1555549233	42.3217472015	492.6442544313
127.1555673171	42.3217472015	492.5917834848
127.1555797110	42.3217472015	492.5393125384
127.1555921048	42.3217472015	492.4875492451
127.1556044987	42.3217472015	492.4393619239
127.1556168926	42.3217472015	492.3911746027
127.1556292864	42.3217472015	492.3429872815
127.1556416803	42.3217472015	492.2947999603
127.1556540741	42.3217472015	492.2466126391
127.1556664680	42.3217472015	492.1984253179
127.1556788618	42.3217472015	492.1502369394
127.1556912557	42.3217472015	492.1020452115
127.1557036496	42.3217472015	492.0538534835
127.1557160434	42.3217472015	492.0056617557
127.1557284373	42.3217472015	491.9574700277
127.1557408311	42.3217472015	491.9092782998
127.1557532250	42.3217472015	491.8610865720
127.1557656188	42.3217472015	491.7954279065
127.1557780127	42.3217472015	491.6915262007
127.1557904066	42.3217472015	491.5876244948
127.1558028004	42.3217472015	491.4837227890
127.1558151943	42.3217472015	491.3798210831
127.1558275881	42.3217472015	491.2759193773
127.1558399820	42.3217472015	491.1720176714
127.1558523759	42.3217472015	491.0681161257
127.1558647697	42.3217472015	490.9642148309
127.1558771636	42.3217472015	490.8603135360
127.1558895574	42.3217472015	490.7564122412
127.1559019513	42.3217472015	490.6525109462
127.1559143451	42.3217472015	490.5486096514
127.1559267390	42.3217472015	490.4447083565
127.1559391329	42.3217472015	490.3408070617
127.1559515267	42.3217472015	490.2369057668
127.1559639206	42.3217472015	490.1330044720
127.1559763144	42.3217472015	490.0291031772
127.1559887083	42.3217472015	489.9252018823
127.1560011022	42.3217472015	489.8213005874
127.1560134960	42.3217472015	489.7173992925
127.1560258899	42.3217472015	489.6134956229
127.1560382837	42.3217472015	489.5095899213
127.1560506776	42.3217472015	489.4056842198
127.1560630715	42.3217472015	489.3017785182
127.1560754653	42.3217472015	489.1978728167
127.1560878592	42.3217472015	489.0939671152
127.1561002530	42.3217472015	488.9900614135
127.1561126469	42.3217472015	488.8861559642
127.1561250407	42.3217472015	488.7822506736
127.1561374346	42.3217472015	488.6783453830
127.1561498285	42.3217472015	488.5744400924
127.1561622223	42.3217472015	488.4705348018
127.1561746162	42.3217472015	488.3666295113
127.1561870100	42.3217472015	488.2627242207
127.1561994039	42.3217472015	488.1588216807
127.1562117978	42.3217472015	488.0549203858
127.1562241916	42.3217472015	487.9510190910
127.1562365855	42.3217472015	487.8471177961
127.1562489793	42.3217472015	487.7432165013
127.1562613732	42.3217472015	487.6393152063
127.1562737670	42.3217472015	487.5354139115
127.1562861609	42.3217472015	487.4315123031
127.1562985548	42.3217472015	487.3276105972
127.1563109486	42.3217472015	487.2237088914
127.1563233425	42.3217472015	487.1198071855
127.1563357363	42.3217472015	487.0159054797
127.1563481302	42.3217472015	486.9120037738
127.1563605241	42.3217472015	486.8081020680
127.1563729179	42.3217472015	486.7041970143
127.1563853118	42.3217472015	486.6002913128
127.1563977056	42.3217472015	486.4963856113
127.1564100995	42.3217472015	486.3924799096
127.1564224933	42.3217472015	486.2885742081
127.1564348872	42.3217472015	486.1846685065
127.1564472811	42.3217472015	486.0807628050
127.1564596749	42.3217472015	485.9768611249
127.1564720688	42.3217472015	485.8729598301
127.1564844626	42.3217472015	485.7690585353
127.1564968565	42.3217472015	485.6651572404
127.1565092503	42.3217472015	485.5612559456
127.1565216442	42.3217472015	485.4573546506
127.1565340381	42.3217472015	485.3534533558
127.1565464319	42.3217472015	485.2495520609
127.1565588258	42.3217472015	485.1456507661
127.1565712196	42.3217472015	485.0417494712
127.1565836135	42.3217472015	484.9378481764
127.1555425294	42.3217562491	492.4646597631
127.1555549233	42.3217562491	492.4073471466
127.1555673171	42.3217562491	492.3500345300
127.1555797110	42.3217562491	492.2927219135
127.1555921048	42.3217562491	492.2369167920
127.1556044987	42.3217562491	492.1887294708
127.1556168926	42.3217562491	492.1405421495
127.1556292864	42.3217562491	492.0923548284
127.1556416803	42.3217562491	492.0441675071
127.1556540741	42.3217562491	491.9959801860
127.1556664680	42.3217562491	491.9477928648
127.1556788618	42.3217562491	491.8996044862
127.1556912557	42.3217562491	491.8514127583
127.1557036496	42.3217562491	491.8032210304
127.1557160434	42.3217562491	491.7550293025
127.1557284373	42.3217562491	491.7068375746
127.1557408311	42.3217562491	491.6586458467
127.1557532250	42.3217562491	491.6104541188
127.1557656188	42.3217562491	491.5447985241
127.1557780127	42.3217562491	491.4408963538
127.1557904066	42.3217562491	491.3369941834
127.1558028004	42.3217562491	491.2330920131
127.1558151943	42.3217562491	491.1291898426
127.1558275881	42.3217562491	491.0252876723
127.1558399820	42.3217562491	490.9213855019
127.1558523759	42.3217562491	490.8174836726
127.1558647697	42.3217562491	490.7135823778
127.1558771636	42.3217562491	490.6096810828
127.1558895574	42.3217562491	490.5057797880
127.1559019513	42.3217562491	490.4018784931
127.1559143451	42.3217562491	490.2979771983
127.1559267390	42.3217562491	490.1940759034
127.1559391329	42.3217562491	490.0901746086
127.1559515267	42.3217562491	489.9862733136
127.1559639206	42.3217562491	489.8823720188
127.1559763144	42.3217562491	489.7784707240
127.1559887083	42.3217562491	489.6745694291
127.1560011022	42.3217562491	489.5706681343
127.1560134960	42.3217562491	489.4667668394
127.1560258899	42.3217562491	489.3628631698
127.1560382837	42.3217562491	489.2589574682
127.1560506776	42.3217562491	489.1550517667
127.1560630715	42.3217562491	489.0511460650
127.1560754653	42.3217562491	488.9472403635
127.1560878592	42.3217562491	488.8433346620
127.1561002530	42.3217562491	488.7394289604
127.1561126469	42.3217562491	488.6355237961
127.1561250407	42.3217562491	488.5316189700
127.1561374346	42.3217562491	488.4277141440
127.1561498285	42.3217562491	488.3238093178
127.1561622223	42.3217562491	488.2199044918
127.1561746162	42.3217562491	488.1159996658
127.1561870100	42.3217562491	488.0120948397
127.1561994039	42.3217562491	487.9081924445
127.1562117978	42.3217562491	487.8042911496
127.1562241916	42.3217562491	487.7003898547
127.1562365855	42.3217562491	487.5964885598
127.1562489793	42.3217562491	487.4925872650
127.1562613732	42.3217562491	487.3886859701
127.1562737670	42.3217562491	487.2847846753
127.1562861609	42.3217562491	487.1808827124
127.1562985548	42.3217562491	487.0769805420
127.1563109486	42.3217562491	486.9730783717
127.1563233425	42.3217562491	486.8691762012
127.1563357363	42.3217562491	486.7652740309
127.1563481302	42.3217562491	486.6613718605
127.1563605241	42.3217562491	486.5574696902
127.1563729179	42.3217562491	486.4535645611
127.1563853118	42.3217562491	486.3496588596
127.1563977056	42.3217562491	486.2457531581
127.1564100995	42.3217562491	486.1418474565
127.1564224933	42.3217562491	486.0379417550
127.1564348872	42.3217562491	485.9340360533
127.1564472811	42.3217562491	485.8301303518
127.1564596749	42.3217562491	485.7262286718
127.1564720688	42.3217562491	485.6223273770
127.1564844626	42.3217562491	485.5184260822
127.1564968565	42.3217562491	485.4145247872
127.1565092503	42.3217562491	485.3106234924
127.1565216442	42.3217562491	485.2067221975
127.1565340381	42.3217562491	485.1028209027
127.1565464319	42.3217562491	484.9989196078
127.1565588258	42.3217562491	484.8950183130
127.1565712196	42.3217562491	484.7911170180
127.1565836135	42.3217562491	484.6872157232
127.1555425294	42.3217652966	492.2325941484
127.1555549233	42.3217652966	492.1704398617
127.1555673171	42.3217652966	492.1082855750
127.1555797110	42.3217652966	492.0461312884
127.1555921048	42.3217652966	491.9862843386
127.1556044987	42.3217652966	491.9380970174
127.1556168926	42.3217652966	491.8899096962
127.1556292864	42.3217652966	491.8417223750
127.1556416803	42.3217652966	491.7935350538
127.1556540741	42.3217652966	491.7453477326
127.1556664680	42.3217652966	491.6971604114
127.1556788618	42.3217652966	491.6489720329
127.1556912557	42.3217652966	491.6007803050
127.1557036496	42.3217652966	491.5525885770
127.1557160434	42.3217652966	491.5043968492
127.1557284373	42.3217652966	491.4562051212
127.1557408311	42.3217652966	491.4080133933
127.1557532250	42.3217652966	491.3598216655
127.1557656188	42.3217652966	491.2941691415
127.1557780127	42.3217652966	491.1902665067
127.1557904066	42.3217652966	491.0863638717
127.1558028004	42.3217652966	490.9824612369
127.1558151943	42.3217652966	490.8785586020
127.1558275881	42.3217652966	490.7746559671
127.1558399820	42.3217652966	490.6707533322
127.1558523759	42.3217652966	490.5668512192
127.1558647697	42.3217652966	490.4629499244
127.1558771636	42.3217652966	490.3590486295
127.1558895574	42.3217652966	490.2551473347
127.1559019513	42.3217652966	490.1512460398
127.1559143451	42.3217652966	490.0473447450
127.1559267390	42.3217652966	489.9434434500
127.1559391329	42.3217652966	489.8395421552
127.1559515267	42.3217652966	489.7356408603
127.1559639206	42.3217652966	489.6317395655
127.1559763144	42.3217652966	489.5278382707
127.1559887083	42.3217652966	489.4239369758
127.1560011022	42.3217652966	489.3200356810
127.1560134960	42.3217652966	489.2161343860
127.1560258899	42.3217652966	489.1122307165
127.1560382837	42.3217652966	489.0083250148
127.1560506776	42.3217652966	488.9044193133
127.1560630715	42.3217652966	488.8005136117
127.1560754653	42.3217652966	488.6966079102
127.1560878592	42.3217652966	488.5927022087
127.1561002530	42.3217652966	488.4887965070
127.1561126469	42.3217652966	488.3848916278
127.1561250407	42.3217652966	488.2809872662
127.1561374346	42.3217652966	488.1770829047
127.1561498285	42.3217652966	488.0731785431
127.1561622223	42.3217652966	487.9692741816
127.1561746162	42.3217652966	487.8653698201
127.1561870100	42.3217652966	487.7614654585
127.1561994039	42.3217652966	487.6575632080
127.1562117978	42.3217652966	487.5536619131
127.1562241916	42.3217652966	487.4497606183
127.1562365855	42.3217652966	487.3458593234
127.1562489793	42.3217652966	487.2419580286
127.1562613732	42.3217652966	487.1380567337
127.1562737670	42.3217652966	487.0341554389
127.1562861609	42.3217652966	486.9302531215
127.1562985548	42.3217652966	486.8263504865
127.1563109486	42.3217652966	486.7224478517
127.1563233425	42.3217652966	486.6185452168
127.1563357363	42.3217652966	486.5146425819
127.1563481302	42.3217652966	486.4107399470
127.1563605241	42.3217652966	486.3068373122
127.1563729179	42.3217652966	486.2029321078
127.1563853118	42.3217652966	486.0990264063
127.1563977056	42.3217652966	485.9951207048
127.1564100995	42.3217652966	485.8912150031
127.1564224933	42.3217652966	485.7873093016
127.1564348872	42.3217652966	485.6834036000
127.1564472811	42.3217652966	485.5794978985
127.1564596749	42.3217652966	485.4755962184
127.1564720688	42.3217652966	485.3716949236
127.1564844626	42.3217652966	485.2677936288
127.1564968565	42.3217652966	485.1638923339
127.1565092503	42.3217652966	485.0599910391
127.1565216442	42.3217652966	484.9560897442
127.1565340381	42.3217652966	484.8521884494
127.1565464319	42.3217652966	484.7482871544
127.1565588258	42.3217652966	484.6443858596
127.1565712196	42.3217652966	484.5404845647
127.1565836135	42.3217652966	484.4365832699
127.1555425294	42.3217743442	492.0005285336
127.1555549233	42.3217743442	491.9335325768
127.1555673171	42.3217743442	491.8665366200
127.1555797110	42.3217743442	491.7995406633
127.1555921048	42.3217743442	491.7356518853
127.1556044987	42.3217743442	491.6874645641
127.1556168926	42.3217743442	491.6392772429
127.1556292864	42.3217743442	491.5910899217
127.1556416803	42.3217743442	491.5429026005
127.1556540741	42.3217743442	491.4947152793
127.1556664680	42.3217743442	491.4465279581
127.1556788618	42.3217743442	491.3983395795
127.1556912557	42.3217743442	491.3501478516
127.1557036496	42.3217743442	491.3019561237
127.1557160434	42.3217743442	491.2537643958
127.1557284373	42.3217743442	491.2055726679
127.1557408311	42.3217743442	491.1573809400
127.1557532250	42.3217743442	491.1091892121
127.1557656188	42.3217743442	491.0435397589
127.1557780127	42.3217743442	490.9396366595
127.1557904066	42.3217743442	490.8357335601
127.1558028004	42.3217743442	490.7318304607
127.1558151943	42.3217743442	490.6279273613
127.1558275881	42.3217743442	490.5240242619
127.1558399820	42.3217743442	490.4201211625
127.1558523759	42.3217743442	490.3162187659
127.1558647697	42.3217743442	490.2123174711
127.1558771636	42.3217743442	490.1084161761
127.1558895574	42.3217743442	490.0045148813
127.1559019513	42.3217743442	489.9006135864
127.1559143451	42.3217743442	489.7967122916
127.1559267390	42.3217743442	489.6928109967
127.1559391329	42.3217743442	489.5889097019
127.1559515267	42.3217743442	489.4850084070
127.1559639206	42.3217743442	489.3811071122
127.1559763144	42.3217743442	489.2772058174
127.1559887083	42.3217743442	489.1733045224
127.1560011022	42.3217743442	489.0694032276
127.1560134960	42.3217743442	488.9655019327
127.1560258899	42.3217743442	488.8615982631
127.1560382837	42.3217743442	488.7576925615
127.1560506776	42.3217743442	488.6537868600
127.1560630715	42.3217743442	488.5498811583
127.1560754653	42.3217743442	488.4459754568
127.1560878592	42.3217743442	488.3420697553
127.1561002530	42.3217743442	488.2381640537
127.1561126469	42.3217743442	488.1342594595
127.1561250407	42.3217743442	488.0303555624
127.1561374346	42.3217743442	487.9264516654
127.1561498285	42.3217743442	487.8225477684
127.1561622223	42.3217743442	487.7186438714
127.1561746162	42.3217743442	487.6147399744
127.1561870100	42.3217743442	487.5108360773
127.1561994039	42.3217743442	487.4069339716
127.1562117978	42.3217743442	487.3030326767
127.1562241916	42.3217743442	487.1991313819
127.1562365855	42.3217743442	487.0952300870
127.1562489793	42.3217743442	486.9913287921
127.1562613732	42.3217743442	486.8874274972
127.1562737670	42.3217743442	486.7835262024
127.1562861609	42.3217743442	486.6796235305
127.1562985548	42.3217743442	486.5757204311
127.1563109486	42.3217743442	486.4718173317
127.1563233425	42.3217743442	486.3679142323
127.1563357363	42.3217743442	486.2640111330
127.1563481302	42.3217743442	486.1601080335
127.1563605241	42.3217743442	486.0562049342
127.1563729179	42.3217743442	485.9522996544
127.1563853118	42.3217743442	485.8483939529
127.1563977056	42.3217743442	485.7444882514
127.1564100995	42.3217743442	485.6405825498
127.1564224933	42.3217743442	485.5366768483
127.1564348872	42.3217743442	485.4327711467
127.1564472811	42.3217743442	485.3288654451
127.1564596749	42.3217743442	485.2249637651
127.1564720688	42.3217743442	485.1210624703
127.1564844626	42.3217743442	485.0171611755
127.1564968565	42.3217743442	484.9132598806
127.1565092503	42.3217743442	484.8093585857
127.1565216442	42.3217743442	484.7054572908
127.1565340381	42.3217743442	484.6015559960
127.1565464319	42.3217743442	484.4976547011
127.1565588258	42.3217743442	484.3937534063
127.1565712196	42.3217743442	484.2898521114
127.1565836135	42.3217743442	484.1859508166
127.1555425294	42.3217833917	491.7684629190
127.1555549233	42.3217833917	491.6966252921
127.1555673171	42.3217833917	491.6247876652
127.1555797110	42.3217833917	491.5529500383
127.1555921048	42.3217833917	491.4850194321
127.1556044987	42.3217833917	491.4368321109
127.1556168926	42.3217833917	491.3886447897
127.1556292864	42.3217833917	491.3404574685
127.1556416803	42.3217833917	491.2922701473
127.1556540741	42.3217833917	491.2440828261
127.1556664680	42.3217833917	491.1958955050
127.1556788618	42.3217833917	491.1477071264
127.1556912557	42.3217833917	491.0995153985
127.1557036496	42.3217833917	491.0513236706
127.1557160434	42.3217833917	491.0031319427
127.1557284373	42.3217833917	490.9549402147
127.1557408311	42.3217833917	490.9067484869
127.1557532250	42.3217833917	490.8585567590
127.1557656188	42.3217833917	490.7929103765
127.1557780127	42.3217833917	490.6890068126
127.1557904066	42.3217833917	490.5851032486
127.1558028004	42.3217833917	490.4811996848
127.1558151943	42.3217833917	490.3772961208
127.1558275881	42.3217833917	490.2733925569
127.1558399820	42.3217833917	490.1694889930
127.1558523759	42.3217833917	490.0655863127
127.1558647697	42.3217833917	489.9616850179
127.1558771636	42.3217833917	489.8577837230
127.1558895574	42.3217833917	489.7538824282
127.1559019513	42.3217833917	489.6499811333
127.1559143451	42.3217833917	489.5460798385
127.1559267390	42.3217833917	489.4421785435
127.1559391329	42.3217833917	489.3382772487
127.1559515267	42.3217833917	489.2343759538
127.1559639206	42.3217833917	489.1304746590
127.1559763144	42.3217833917	489.0265733642
127.1559887083	42.3217833917	488.9226720693
127.1560011022	42.3217833917	488.8187707745
127.1560134960	42.3217833917	488.7148694796
127.1560258899	42.3217833917	488.6109658100
127.1560382837	42.3217833917	488.5070601083
127.1560506776	42.3217833917	488.4031544068
127.1560630715	42.3217833917	488.2992487052
127.1560754653	42.3217833917	488.1953430037
127.1560878592	42.3217833917	488.0914373022
127.1561002530	42.3217833917	487.9875316006
127.1561126469	42.3217833917	487.8836272914
127.1561250407	42.3217833917	487.7797238588
127.1561374346	42.3217833917	487.6758204264
127.1561498285	42.3217833917	487.5719169938
127.1561622223	42.3217833917	487.4680135613
127.1561746162	42.3217833917	487.3641101289
127.1561870100	42.3217833917	487.2602066963
127.1561994039	42.3217833917	487.1563047354
127.1562117978	42.3217833917	487.0524034404
127.1562241916	42.3217833917	486.9485021456
127.1562365855	42.3217833917	486.8446008507
127.1562489793	42.3217833917	486.7406995559
127.1562613732	42.3217833917	486.6367982610
127.1562737670	42.3217833917	486.5328969662
127.1562861609	42.3217833917	486.4289939398
127.1562985548	42.3217833917	486.3250903758
127.1563109486	42.3217833917	486.2211868120
127.1563233425	42.3217833917	486.1172832480
127.1563357363	42.3217833917	486.0133796842
127.1563481302	42.3217833917	485.9094761202
127.1563605241	42.3217833917	485.8055725563
127.1563729179	42.3217833917	485.7016672013
127.1563853118	42.3217833917	485.5977614998
127.1563977056	42.3217833917	485.4938557983
127.1564100995	42.3217833917	485.3899500967
127.1564224933	42.3217833917	485.2860443951
127.1564348872	42.3217833917	485.1821386935
127.1564472811	42.3217833917	485.0782329920
127.1564596749	42.3217833917	484.9743313119
127.1564720688	42.3217833917	484.8704300171
127.1564844626	42.3217833917	484.7665287223
127.1564968565	42.3217833917	484.6626274274
127.1565092503	42.3217833917	484.5587261326
127.1565216442	42.3217833917	484.4548248377
127.1565340381	42.3217833917	484.3509235429
127.1565464319	42.3217833917	484.2470222480
127.1565588258	42.3217833917	484.1431209531
127.1565712196	42.3217833917	484.0392196582
127.1565836135	42.3217833917	483.9353183634
127.1555425294	42.3217924393	491.5363973042
127.1555549233	42.3217924393	491.4597180072
127.1555673171	42.3217924393	491.3830387102
127.1555797110	42.3217924393	491.3063594132
127.1555921048	42.3217924393	491.2343869788
127.1556044987	42.3217924393	491.1861996576
127.1556168926	42.3217924393	491.1380123364
127.1556292864	42.3217924393	491.0898250152
127.1556416803	42.3217924393	491.0416376940
127.1556540741	42.3217924393	490.9934503728
127.1556664680	42.3217924393	490.9452630516
127.1556788618	42.3217924393	490.8970746730
127.1556912557	42.3217924393	490.8488829452
127.1557036496	42.3217924393	490.8006912172
127.1557160434	42.3217924393	490.7524994893
127.1557284373	42.3217924393	490.7043077614
127.1557408311	42.3217924393	490.6561160335
127.1557532250	42.3217924393	490.6079243056
127.1557656188	42.3217924393	490.5422809938
127.1557780127	42.3217924393	490.4383769655
127.1557904066	42.3217924393	490.3344729370
127.1558028004	42.3217924393	490.2305689086
127.1558151943	42.3217924393	490.1266648801
127.1558275881	42.3217924393	490.0227608517
127.1558399820	42.3217924393	489.9188568233
127.1558523759	42.3217924393	489.8149538594
127.1558647697	42.3217924393	489.7110525646
127.1558771636	42.3217924393	489.6071512697
127.1558895574	42.3217924393	489.5032499749
127.1559019513	42.3217924393	489.3993486799
127.1559143451	42.3217924393	489.2954473851
127.1559267390	42.3217924393	489.1915460902
127.1559391329	42.3217924393	489.0876447954
127.1559515267	42.3217924393	488.9837435005
127.1559639206	42.3217924393	488.8798422057
127.1559763144	42.3217924393	488.7759409109
127.1559887083	42.3217924393	488.6720396159
127.1560011022	42.3217924393	488.5681383211
127.1560134960	42.3217924393	488.4642370262
127.1560258899	42.3217924393	488.3603333566
127.1560382837	42.3217924393	488.2564276550
127.1560506776	42.3217924393	488.1525219535
127.1560630715	42.3217924393	488.0486162519
127.1560754653	42.3217924393	487.9447105504
127.1560878592	42.3217924393	487.8408048488
127.1561002530	42.3217924393	487.7368991472
127.1561126469	42.3217924393	487.6329951231
127.1561250407	42.3217924393	487.5290921551
127.1561374346	42.3217924393	487.4251891871
127.1561498285	42.3217924393	487.3212862191
127.1561622223	42.3217924393	487.2173832511
127.1561746162	42.3217924393	487.1134802832
127.1561870100	42.3217924393	487.0095773151
127.1561994039	42.3217924393	486.9056754989
127.1562117978	42.3217924393	486.8017742040
127.1562241916	42.3217924393	486.6978729092
127.1562365855	42.3217924393	486.5939716143
127.1562489793	42.3217924393	486.4900703195
127.1562613732	42.3217924393	486.3861690246
127.1562737670	42.3217924393	486.2822677298
127.1562861609	42.3217924393	486.1783643489
127.1562985548	42.3217924393	486.0744603204
127.1563109486	42.3217924393	485.9705562920
127.1563233425	42.3217924393	485.8666522635
127.1563357363	42.3217924393	485.7627482352
127.1563481302	42.3217924393	485.6588442067
127.1563605241	42.3217924393	485.5549401783
127.1563729179	42.3217924393	485.4510347480
127.1563853118	42.3217924393	485.3471290465
127.1563977056	42.3217924393	485.2432233449
127.1564100995	42.3217924393	485.1393176433
127.1564224933	42.3217924393	485.0354119418
127.1564348872	42.3217924393	484.9315062402
127.1564472811	42.3217924393	484.8276005387
127.1564596749	42.3217924393	484.7236988586
127.1564720688	42.3217924393	484.6197975638
127.1564844626	42.3217924393	484.5158962690
127.1564968565	42.3217924393	484.4119949741
127.1565092503	42.3217924393	484.3080936793
127.1565216442	42.3217924393	484.2041923843
127.1565340381	42.3217924393	484.1002910895
127.1565464319	42.3217924393	483.9963897946
127.1565588258	42.3217924393	483.8924884998
127.1565712196	42.3217924393	483.7885872049
127.1565836135	42.3217924393	483.6846859101
127.1555425294	42.3218014868	491.3043316896
127.1555549233	42.3218014868	491.2228107225
127.1555673171	42.3218014868	491.1412897554
127.1555797110	42.3218014868	491.0597687883
127.1555921048	42.3218014868	490.9837545256
127.1556044987	42.3218014868	490.9355672045
127.1556168926	42.3218014868	490.8873798832
127.1556292864	42.3218014868	490.8391925621
127.1556416803	42.3218014868	490.7910052408
127.1556540741	42.3218014868	490.7428179196
127.1556664680	42.3218014868	490.6946305985
127.1556788618	42.3218014868	490.6464422199
127.1556912557	42.3218014868	490.5982504920
127.1557036496	42.3218014868	490.5500587641
127.1557160434	42.3218014868	490.5018670362
127.1557284373	42.3218014868	490.4536753083
127.1557408311	42.3218014868	490.4054835804
127.1557532250	42.3218014868	490.3572918525
127.1557656188	42.3218014868	490.2916516114
127.1557780127	42.3218014868	490.1877471185
127.1557904066	42.3218014868	490.0838426255
127.1558028004	42.3218014868	489.9799381326
127.1558151943	42.3218014868	489.8760336396
127.1558275881	42.3218014868	489.7721291467
127.1558399820	42.3218014868	489.6682246537
127.1558523759	42.3218014868	489.5643214062
127.1558647697	42.3218014868	489.4604201114
127.1558771636	42.3218014868	489.3565188165
127.1558895574	42.3218014868	489.2526175217
127.1559019513	42.3218014868	489.1487162268
127.1559143451	42.3218014868	489.0448149320
127.1559267390	42.3218014868	488.9409136371
127.1559391329	42.3218014868	488.8370123423
127.1559515267	42.3218014868	488.7331110473
127.1559639206	42.3218014868	488.6292097525
127.1559763144	42.3218014868	488.5253084577
127.1559887083	42.3218014868	488.4214071628
127.1560011022	42.3218014868	488.3175058680
127.1560134960	42.3218014868	488.2136045731
127.1560258899	42.3218014868	488.1097009035
127.1560382837	42.3218014868	488.0057952019
127.1560506776	42.3218014868	487.9018895003
127.1560630715	42.3218014868	487.7979837987
127.1560754653	42.3218014868	487.6940780972
127.1560878592	42.3218014868	487.5901723957
127.1561002530	42.3218014868	487.4862666941
127.1561126469	42.3218014868	487.3823629550
127.1561250407	42.3218014868	487.2784604515
127.1561374346	42.3218014868	487.1745579481
127.1561498285	42.3218014868	487.0706554445
127.1561622223	42.3218014868	486.9667529411
127.1561746162	42.3218014868	486.8628504377
127.1561870100	42.3218014868	486.7589479341
127.1561994039	42.3218014868	486.6550462627
127.1562117978	42.3218014868	486.5511449678
127.1562241916	42.3218014868	486.4472436730
127.1562365855	42.3218014868	486.3433423780
127.1562489793	42.3218014868	486.2394410832
127.1562613732	42.3218014868	486.1355397883
127.1562737670	42.3218014868	486.0316384935
127.1562861609	42.3218014868	485.9277347582
127.1562985548	42.3218014868	485.8238302652
127.1563109486	42.3218014868	485.7199257723
127.1563233425	42.3218014868	485.6160212793
127.1563357363	42.3218014868	485.5121167864
127.1563481302	42.3218014868	485.4082122934
127.1563605241	42.3218014868	485.3043078005
127.1563729179	42.3218014868	485.2004022948
127.1563853118	42.3218014868	485.0964965933
127.1563977056	42.3218014868	484.9925908918
127.1564100995	42.3218014868	484.8886851902
127.1564224933	42.3218014868	484.7847794887
127.1564348872	42.3218014868	484.6808737870
127.1564472811	42.3218014868	484.5769680855
127.1564596749	42.3218014868	484.4730664055
127.1564720688	42.3218014868	484.3691651107
127.1564844626	42.3218014868	484.2652638158
127.1564968565	42.3218014868	484.1613625209
127.1565092503	42.3218014868	484.0574612261
127.1565216442	42.3218014868	483.9535599312
127.1565340381	42.3218014868	483.8496586364
127.1565464319	42.3218014868	483.7457573415
127.1565588258	42.3218014868	483.6418560467
127.1565712196	42.3218014868	483.5379547517
127.1565836135	42.3218014868	483.4340534569
127.1555425294	42.3218105344	491.0722660749
127.1555549233	42.3218105344	490.9859034376
127.1555673171	42.3218105344	490.8995408003
127.1555797110	42.3218105344	490.8131781631
127.1555921048	42.3218105344	490.7331220723
127.1556044987	42.3218105344	490.6849347511
127.1556168926	42.3218105344	490.6367474299
127.1556292864	42.3218105344	490.5885601087
127.1556416803	42.3218105344	490.5403727875
127.1556540741	42.3218105344	490.4921854663
127.1556664680	42.3218105344	490.4439981451
127.1556788618	42.3218105344	490.3958097666
127.1556912557	42.3218105344	490.3476180387
127.1557036496	42.3218105344	490.2994263107
127.1557160434	42.3218105344	490.2512345829
127.1557284373	42.3218105344	490.2030428549
127.1557408311	42.3218105344	490.1548511270
127.1557532250	42.3218105344	490.1066593992
127.1557656188	42.3218105344	490.0410222288
127.1557780127	42.3218105344	489.9371172714
127.1557904066	42.3218105344	489.8332123139
127.1558028004	42.3218105344	489.7293073565
127.1558151943	42.3218105344	489.6254023990
127.1558275881	42.3218105344	489.5214974415
127.1558399820	42.3218105344	489.4175924840
127.1558523759	42.3218105344	489.3136889529
127.1558647697	42.3218105344	489.2097876581
127.1558771636	42.3218105344	489.1058863632
127.1558895574	42.3218105344	489.0019850684
127.1559019513	42.3218105344	488.8980837734
127.1559143451	42.3218105344	488.7941824786
127.1559267390	42.3218105344	488.6902811837
127.1559391329	42.3218105344	488.5863798889
127.1559515267	42.3218105344	488.4824785940
127.1559639206	42.3218105344	488.3785772992
127.1559763144	42.3218105344	488.2746760044
127.1559887083	42.3218105344	488.1707747095
127.1560011022	42.3218105344	488.0668734147
127.1560134960	42.3218105344	487.9629721197
127.1560258899	42.3218105344	487.8590684501
127.1560382837	42.3218105344	487.7551627485
127.1560506776	42.3218105344	487.6512570470
127.1560630715	42.3218105344	487.5473513454
127.1560754653	42.3218105344	487.4434456439
127.1560878592	42.3218105344	487.3395399424
127.1561002530	42.3218105344	487.2356342407
127.1561126469	42.3218105344	487.1317307867
127.1561250407	42.3218105344	487.0278287477
127.1561374346	42.3218105344	486.9239267088
127.1561498285	42.3218105344	486.8200246698
127.1561622223	42.3218105344	486.7161226309
127.1561746162	42.3218105344	486.6122205920
127.1561870100	42.3218105344	486.5083185529
127.1561994039	42.3218105344	486.4044170263
127.1562117978	42.3218105344	486.3005157313
127.1562241916	42.3218105344	486.1966144365
127.1562365855	42.3218105344	486.0927131416
127.1562489793	42.3218105344	485.9888118468
127.1562613732	42.3218105344	485.8849105519
127.1562737670	42.3218105344	485.7810092571
127.1562861609	42.3218105344	485.6771051673
127.1562985548	42.3218105344	485.5732002097
127.1563109486	42.3218105344	485.4692952523
127.1563233425	42.3218105344	485.3653902948
127.1563357363	42.3218105344	485.2614853374
127.1563481302	42.3218105344	485.1575803799
127.1563605241	42.3218105344	485.0536754225
127.1563729179	42.3218105344	484.9497698415
127.1563853118	42.3218105344	484.8458641400
127.1563977056	42.3218105344	484.7419584385
127.1564100995	42.3218105344	484.6380527368
127.1564224933	42.3218105344	484.5341470353
127.1564348872	42.3218105344	484.4302413337
127.1564472811	42.3218105344	484.3263356322
127.1564596749	42.3218105344	484.2224339521
127.1564720688	42.3218105344	484.1185326573
127.1564844626	42.3218105344	484.0146313625
127.1564968565	42.3218105344	483.9107300676
127.1565092503	42.3218105344	483.8068287728
127.1565216442	42.3218105344	483.7029274779
127.1565340381	42.3218105344	483.5990261830
127.1565464319	42.3218105344	483.4951248881
127.1565588258	42.3218105344	483.3912235933
127.1565712196	42.3218105344	483.2873222984
127.1565836135	42.3218105344	483.1834210036
127.1555425294	42.3218195819	490.8402004603
127.1555549233	42.3218195819	490.7489961529
127.1555673171	42.3218195819	490.6577918455
127.1555797110	42.3218195819	490.5665875382
127.1555921048	42.3218195819	490.4824896192
127.1556044987	42.3218195819	490.4343022980
127.1556168926	42.3218195819	490.3861149767
127.1556292864	42.3218195819	490.3379276556
127.1556416803	42.3218195819	490.2897403343
127.1556540741	42.3218195819	490.2415530132
127.1556664680	42.3218195819	490.1933656920
127.1556788618	42.3218195819	490.1451773134
127.1556912557	42.3218195819	490.0969855855
127.1557036496	42.3218195819	490.0487938576
127.1557160434	42.3218195819	490.0006021297
127.1557284373	42.3218195819	489.9524104018
127.1557408311	42.3218195819	489.9042186739
127.1557532250	42.3218195819	489.8560269460
127.1557656188	42.3218195819	489.7903928464
127.1557780127	42.3218195819	489.6864874245
127.1557904066	42.3218195819	489.5825820024
127.1558028004	42.3218195819	489.4786765805
127.1558151943	42.3218195819	489.3747711585
127.1558275881	42.3218195819	489.2708657365
127.1558399820	42.3218195819	489.1669603145
127.1558523759	42.3218195819	489.0630564998
127.1558647697	42.3218195819	488.9591552050
127.1558771636	42.3218195819	488.8552539100
127.1558895574	42.3218195819	488.7513526152
127.1559019513	42.3218195819	488.6474513203
127.1559143451	42.3218195819	488.5435500255
127.1559267390	42.3218195819	488.4396487306
127.1559391329	42.3218195819	488.3357474358
127.1559515267	42.3218195819	488.2318461408
127.1559639206	42.3218195819	488.1279448460
127.1559763144	42.3218195819	488.0240435512
127.1559887083	42.3218195819	487.9201422563
127.1560011022	42.3218195819	487.8162409615
127.1560134960	42.3218195819	487.7123396666
127.1560258899	42.3218195819	487.6084359970
127.1560382837	42.3218195819	487.5045302954
127.1560506776	42.3218195819	487.4006245939
127.1560630715	42.3218195819	487.2967188922
127.1560754653	42.3218195819	487.1928131907
127.1560878592	42.3218195819	487.0889074892
127.1561002530	42.3218195819	486.9850017876
127.1561126469	42.3218195819	486.8810986186
127.1561250407	42.3218195819	486.7771970441
127.1561374346	42.3218195819	486.6732954698
127.1561498285	42.3218195819	486.5693938952
127.1561622223	42.3218195819	486.4654923209
127.1561746162	42.3218195819	486.3615907465
127.1561870100	42.3218195819	486.2576891720
127.1561994039	42.3218195819	486.1537877900
127.1562117978	42.3218195819	486.0498864951
127.1562241916	42.3218195819	485.9459852003
127.1562365855	42.3218195819	485.8420839054
127.1562489793	42.3218195819	485.7381826106
127.1562613732	42.3218195819	485.6342813156
127.1562737670	42.3218195819	485.5303800208
127.1562861609	42.3218195819	485.4264755765
127.1562985548	42.3218195819	485.3225701545
127.1563109486	42.3218195819	485.2186647326
127.1563233425	42.3218195819	485.1147593105
127.1563357363	42.3218195819	485.0108538886
127.1563481302	42.3218195819	484.9069484666
127.1563605241	42.3218195819	484.8030430446
127.1563729179	42.3218195819	484.6991373883
127.1563853118	42.3218195819	484.5952316868
127.1563977056	42.3218195819	484.4913259853
127.1564100995	42.3218195819	484.3874202837
127.1564224933	42.3218195819	484.2835145822
127.1564348872	42.3218195819	484.1796088805
127.1564472811	42.3218195819	484.0757031790
127.1564596749	42.3218195819	483.9718014990
127.1564720688	42.3218195819	483.8679002042
127.1564844626	42.3218195819	483.7639989094
127.1564968565	42.3218195819	483.6600976144
127.1565092503	42.3218195819	483.5561963196
127.1565216442	42.3218195819	483.4522950247
127.1565340381	42.3218195819	483.3483937299
127.1565464319	42.3218195819	483.2444924350
127.1565588258	42.3218195819	483.1405911402
127.1565712196	42.3218195819	483.0366898453
127.1565836135	42.3218195819	482.9327885504
127.1555425294	42.3218286295	490.6081354170
127.1555549233	42.3218286295	490.5120896245
127.1555673171	42.3218286295	490.4160438319
127.1555797110	42.3218286295	490.3199980394
127.1555921048	42.3218286295	490.2318584160
127.1556044987	42.3218286295	490.1836709099
127.1556168926	42.3218286295	490.1354834037
127.1556292864	42.3218286295	490.0872958976
127.1556416803	42.3218286295	490.0391083914
127.1556540741	42.3218286295	489.9909208853
127.1556664680	42.3218286295	489.9427333792
127.1556788618	42.3218286295	489.8945448601
127.1556912557	42.3218286295	489.8463531322
127.1557036496	42.3218286295	489.7981614043
127.1557160434	42.3218286295	489.7499696764
127.1557284373	42.3218286295	489.7017779484
127.1557408311	42.3218286295	489.6535862206
127.1557532250	42.3218286295	489.6053944927
127.1557656188	42.3218286295	489.5397622413
127.1557780127	42.3218286295	489.4358565398
127.1557904066	42.3218286295	489.3319508381
127.1558028004	42.3218286295	489.2280451366
127.1558151943	42.3218286295	489.1241394350
127.1558275881	42.3218286295	489.0202337335
127.1558399820	42.3218286295	488.9163280319
127.1558523759	42.3218286295	488.8124240464
127.1558647697	42.3218286295	488.7085227516
127.1558771636	42.3218286295	488.6046214567
127.1558895574	42.3218286295	488.5007201619
127.1559019513	42.3218286295	488.3968188670
127.1559143451	42.3218286295	488.2929175722
127.1559267390	42.3218286295	488.1890162772
127.1559391329	42.3218286295	488.0851149824
127.1559515267	42.3218286295	487.9812136875
127.1559639206	42.3218286295	487.8773123927
127.1559763144	42.3218286295	487.7734110979
127.1559887083	42.3218286295	487.6695098030
127.1560011022	42.3218286295	487.5656085082
127.1560134960	42.3218286295	487.4617072132
127.1560258899	42.3218286295	487.3578036433
127.1560382837	42.3218286295	487.2538981266
127.1560506776	42.3218286295	487.1499926101
127.1560630715	42.3218286295	487.0460870934
127.1560754653	42.3218286295	486.9421815768
[truncated: 10,496 more rows]
