# Supplementary material for: Simulation Study on Coverage Path Planning of Autonomous Tasks in Hilly Farmland Based on Energy Consumption Model
Source: Hindawi journal article supplement (doi:10.1155/2020/4535734), 2020-08-30
Supplement: f1 [file 4535734.f1.zip › 4535734.f1/Algorithm-pathplanning-matlab/2020.04.25/0808/2.csv]

Longitude	Latitude	Elevation
127.1562431471	42.3229414783	0.0000000000
127.1559160942	42.3227129282	0.0000000000
127.1558491400	42.3226406493	0.0000000000
127.1556061968	42.3222843151	0.0000000000
127.1557812411	42.3221533605	0.0000000000
127.1555425294	42.3217470022	0.0000000000
127.1558733606	42.3216205358	0.0000000000
127.1559374373	42.3217715891	0.0000000000
127.1562157013	42.3221114421	0.0000000000
127.1561907198	42.3222392921	0.0000000000
127.1565836135	42.3228228144	0.0000000000
127.1564614879	42.3228733151	0.0000000000
127.1562431471	42.3229414783	0.0000000000
