# Supplementary material for: Simulation Study on Coverage Path Planning of Autonomous Tasks in Hilly Farmland Based on Energy Consumption Model
Source: Hindawi journal article supplement (doi:10.1155/2020/4535734), 2020-08-30
Supplement: f1 [file 4535734.f1.zip › 4535734.f1/Algorithm-pathplanning-matlab/2020.04.25/0909/1.csv]

Longitude	Latitude	Elevation
127.1559736442	42.3215343483	495.8731640116
127.1559860027	42.3215343483	495.7652004158
127.1559983611	42.3215343483	495.6572368202
127.1560107196	42.3215343483	495.5492732245
127.1560230781	42.3215343483	495.4413110038
127.1560354365	42.3215343483	495.3333518022
127.1560477950	42.3215343483	495.2253926007
127.1560601535	42.3215343483	495.1174333991
127.1560725119	42.3215343483	495.0094741975
127.1560848704	42.3215343483	494.9015149960
127.1560972289	42.3215343483	494.7935557944
127.1561095874	42.3215343483	494.6855965928
127.1561219458	42.3215343483	494.5776373913
127.1561343043	42.3215343483	494.4696781897
127.1561466628	42.3215343483	494.3617189881
127.1561590212	42.3215343483	494.2537597865
127.1561713797	42.3215343483	494.1458005850
127.1561837382	42.3215343483	494.0378413834
127.1561960966	42.3215343483	493.9298829000
127.1562084551	42.3215343483	493.8219253976
127.1562208136	42.3215343483	493.7139678950
127.1562331720	42.3215343483	493.6060103924
127.1562455305	42.3215343483	493.4980528898
127.1562578890	42.3215343483	493.3900953873
127.1562702474	42.3215343483	493.2821378847
127.1562826059	42.3215343483	493.1741787591
127.1562949644	42.3215343483	493.0662178586
127.1563073228	42.3215343483	492.9582569579
127.1563196813	42.3215343483	492.8502960573
127.1563320398	42.3215343483	492.7423351567
127.1563443982	42.3215343483	492.6343742562
127.1563567567	42.3215343483	492.5264133555
127.1563691152	42.3215343483	492.4184510196
127.1563814737	42.3215343483	492.3104874240
127.1563938321	42.3215343483	492.2025238283
127.1564061906	42.3215343483	492.0945602325
127.1564185491	42.3215343483	491.9865966369
127.1564309075	42.3215343483	491.8786330412
127.1564432660	42.3215343483	491.7706694455
127.1564556245	42.3215343483	491.6520327420
127.1564679829	42.3215343483	491.5259011674
127.1564803414	42.3215343483	491.3997695927
127.1564926999	42.3215343483	491.2736380180
127.1565050583	42.3215343483	491.1475064434
127.1565174168	42.3215343483	491.0213748686
127.1565297753	42.3215343483	490.8952432939
127.1565421337	42.3215343483	490.7691134504
127.1565544922	42.3215343483	490.6429845709
127.1565668507	42.3215343483	490.5168556913
127.1565792091	42.3215343483	490.3907268116
127.1565915676	42.3215343483	490.2645979321
127.1566039261	42.3215343483	490.1384690525
127.1566162846	42.3215343483	490.0123401729
127.1566286430	42.3215343483	489.8862112934
127.1566410015	42.3215343483	489.7600824137
127.1566533600	42.3215343483	489.6339535341
127.1566657184	42.3215343483	489.5078246544
127.1566780769	42.3215343483	489.3816957749
127.1566904354	42.3215343483	489.2555668953
127.1567027938	42.3215343483	489.1294380157
127.1567151523	42.3215343483	489.0033071089
127.1567275108	42.3215343483	488.8771755342
127.1567398692	42.3215343483	488.7510439594
127.1567522277	42.3215343483	488.6249123847
127.1567645862	42.3215343483	488.4987808101
127.1567769446	42.3215343483	488.3726492354
127.1567893031	42.3215343483	488.2465176606
127.1568016616	42.3215343483	488.1203904365
127.1568140200	42.3215343483	487.9942642519
127.1568263785	42.3215343483	487.8681380674
127.1568387370	42.3215343483	487.7420118829
127.1568510954	42.3215343483	487.6158856985
127.1568634539	42.3215343483	487.4897595139
127.1568758124	42.3215343483	487.3636333294
127.1568881709	42.3215343483	487.2375048218
127.1569005293	42.3215343483	487.1113759421
127.1569128878	42.3215343483	486.9852470625
127.1569252463	42.3215343483	486.8591181830
127.1569376047	42.3215343483	486.7329893034
127.1569499632	42.3215343483	486.6068604237
127.1569623217	42.3215343483	486.4807315441
127.1569746801	42.3215343483	486.3546026646
127.1569870386	42.3215343483	486.2284737849
127.1559736442	42.3215434465	495.6416001191
127.1559860027	42.3215434465	495.5348303289
127.1559983611	42.3215434465	495.4280605389
127.1560107196	42.3215434465	495.3212907488
127.1560230781	42.3215434465	495.2145223336
127.1560354365	42.3215434465	495.1077569376
127.1560477950	42.3215434465	495.0009915417
127.1560601535	42.3215434465	494.8942261457
127.1560725119	42.3215434465	494.7874607497
127.1560848704	42.3215434465	494.6806953538
127.1560972289	42.3215434465	494.5739299577
127.1561095874	42.3215434465	494.4671645617
127.1561219458	42.3215434465	494.3603991658
127.1561343043	42.3215434465	494.2536337698
127.1561466628	42.3215434465	494.1468683738
127.1561590212	42.3215434465	494.0401029778
127.1561713797	42.3215434465	493.9333375818
127.1561837382	42.3215434465	493.8265721858
127.1561960966	42.3215434465	493.7198073111
127.1562084551	42.3215434465	493.6130431485
127.1562208136	42.3215434465	493.5062789857
127.1562331720	42.3215434465	493.3995148229
127.1562455305	42.3215434465	493.2927506601
127.1562578890	42.3215434465	493.1859864975
127.1562702474	42.3215434465	493.0792223347
127.1562826059	42.3215434465	492.9724569938
127.1562949644	42.3215434465	492.8656903646
127.1563073228	42.3215434465	492.7589237354
127.1563196813	42.3215434465	492.6521571061
127.1563320398	42.3215434465	492.5453904768
127.1563443982	42.3215434465	492.4386238477
127.1563567567	42.3215434465	492.3318572184
127.1563691152	42.3215434465	492.2250889058
127.1563814737	42.3215434465	492.1183191158
127.1563938321	42.3215434465	492.0115493257
127.1564061906	42.3215434465	491.9047795355
127.1564185491	42.3215434465	491.7980097455
127.1564309075	42.3215434465	491.6912399553
127.1564432660	42.3215434465	491.5844701652
127.1564556245	42.3215434465	491.4663256710
127.1564679829	42.3215434465	491.3401936307
127.1564803414	42.3215434465	491.2140615901
127.1564926999	42.3215434465	491.0879295496
127.1565050583	42.3215434465	490.9617975092
127.1565174168	42.3215434465	490.8356654687
127.1565297753	42.3215434465	490.7095334282
127.1565421337	42.3215434465	490.5834034181
127.1565544922	42.3215434465	490.4572745386
127.1565668507	42.3215434465	490.3311456590
127.1565792091	42.3215434465	490.2050167794
127.1565915676	42.3215434465	490.0788878999
127.1566039261	42.3215434465	489.9527590202
127.1566162846	42.3215434465	489.8266301406
127.1566286430	42.3215434465	489.7005012611
127.1566410015	42.3215434465	489.5743723814
127.1566533600	42.3215434465	489.4482435018
127.1566657184	42.3215434465	489.3221146222
127.1566780769	42.3215434465	489.1959857427
127.1566904354	42.3215434465	489.0698568630
127.1567027938	42.3215434465	488.9437279834
127.1567151523	42.3215434465	488.8175967263
127.1567275108	42.3215434465	488.6914646858
127.1567398692	42.3215434465	488.5653326452
127.1567522277	42.3215434465	488.4392006047
127.1567645862	42.3215434465	488.3130685643
127.1567769446	42.3215434465	488.1869365238
127.1567893031	42.3215434465	488.0608044833
127.1568016616	42.3215434465	487.9346775452
127.1568140200	42.3215434465	487.8085518265
127.1568263785	42.3215434465	487.6824261077
127.1568387370	42.3215434465	487.5563003890
127.1568510954	42.3215434465	487.4301746703
127.1568634539	42.3215434465	487.3040489516
127.1568758124	42.3215434465	487.1779232328
127.1568881709	42.3215434465	487.0517947895
127.1569005293	42.3215434465	486.9256659099
127.1569128878	42.3215434465	486.7995370302
127.1569252463	42.3215434465	486.6734081507
127.1569376047	42.3215434465	486.5472792711
127.1569499632	42.3215434465	486.4211503914
127.1569623217	42.3215434465	486.2950215118
127.1569746801	42.3215434465	486.1688926323
127.1569870386	42.3215434465	486.0427637527
127.1559736442	42.3215525447	495.4100362268
127.1559860027	42.3215525447	495.3044602422
127.1559983611	42.3215525447	495.1988842578
127.1560107196	42.3215525447	495.0933082732
127.1560230781	42.3215525447	494.9877336637
127.1560354365	42.3215525447	494.8821620732
127.1560477950	42.3215525447	494.7765904829
127.1560601535	42.3215525447	494.6710188925
127.1560725119	42.3215525447	494.5654473020
127.1560848704	42.3215525447	494.4598757117
127.1560972289	42.3215525447	494.3543041213
127.1561095874	42.3215525447	494.2487325308
127.1561219458	42.3215525447	494.1431609405
127.1561343043	42.3215525447	494.0375893501
127.1561466628	42.3215525447	493.9320177596
127.1561590212	42.3215525447	493.8264461692
127.1561713797	42.3215525447	493.7208745789
127.1561837382	42.3215525447	493.6153029884
127.1561960966	42.3215525447	493.5097317224
127.1562084551	42.3215525447	493.4041608996
127.1562208136	42.3215525447	493.2985900766
127.1562331720	42.3215525447	493.1930192536
127.1562455305	42.3215525447	493.0874484306
127.1562578890	42.3215525447	492.9818776077
127.1562702474	42.3215525447	492.8763067847
127.1562826059	42.3215525447	492.7707352286
127.1562949644	42.3215525447	492.6651628708
127.1563073228	42.3215525447	492.5595905130
127.1563196813	42.3215525447	492.4540181551
127.1563320398	42.3215525447	492.3484457972
127.1563443982	42.3215525447	492.2428734394
127.1563567567	42.3215525447	492.1373010815
127.1563691152	42.3215525447	492.0317267922
127.1563814737	42.3215525447	491.9261508078
127.1563938321	42.3215525447	491.8205748232
127.1564061906	42.3215525447	491.7149988386
127.1564185491	42.3215525447	491.6094228542
127.1564309075	42.3215525447	491.5038468696
127.1564432660	42.3215525447	491.3982708851
127.1564556245	42.3215525447	491.2806186002
127.1564679829	42.3215525447	491.1544860940
127.1564803414	42.3215525447	491.0283535877
127.1564926999	42.3215525447	490.9022210814
127.1565050583	42.3215525447	490.7760885752
127.1565174168	42.3215525447	490.6499560689
127.1565297753	42.3215525447	490.5238235626
127.1565421337	42.3215525447	490.3976933860
127.1565544922	42.3215525447	490.2715645065
127.1565668507	42.3215525447	490.1454356269
127.1565792091	42.3215525447	490.0193067472
127.1565915676	42.3215525447	489.8931778677
127.1566039261	42.3215525447	489.7670489881
127.1566162846	42.3215525447	489.6409201084
127.1566286430	42.3215525447	489.5147912290
127.1566410015	42.3215525447	489.3886623493
127.1566533600	42.3215525447	489.2625334697
127.1566657184	42.3215525447	489.1364045900
127.1566780769	42.3215525447	489.0102757105
127.1566904354	42.3215525447	488.8841468309
127.1567027938	42.3215525447	488.7580179513
127.1567151523	42.3215525447	488.6318863438
127.1567275108	42.3215525447	488.5057538375
127.1567398692	42.3215525447	488.3796213312
127.1567522277	42.3215525447	488.2534888249
127.1567645862	42.3215525447	488.1273563187
127.1567769446	42.3215525447	488.0012238124
127.1567893031	42.3215525447	487.8750913061
127.1568016616	42.3215525447	487.7489646541
127.1568140200	42.3215525447	487.6228394011
127.1568263785	42.3215525447	487.4967141482
127.1568387370	42.3215525447	487.3705888952
127.1568510954	42.3215525447	487.2444636424
127.1568634539	42.3215525447	487.1183383894
127.1568758124	42.3215525447	486.9922131364
127.1568881709	42.3215525447	486.8660847574
127.1569005293	42.3215525447	486.7399558777
127.1569128878	42.3215525447	486.6138269981
127.1569252463	42.3215525447	486.4876981186
127.1569376047	42.3215525447	486.3615692390
127.1569499632	42.3215525447	486.2354403593
127.1569623217	42.3215525447	486.1093114797
127.1569746801	42.3215525447	485.9831826002
127.1569870386	42.3215525447	485.8570537205
127.1559736442	42.3215616429	495.1784723343
127.1559860027	42.3215616429	495.0740901553
127.1559983611	42.3215616429	494.9697079765
127.1560107196	42.3215616429	494.8653257975
127.1560230781	42.3215616429	494.7609449935
127.1560354365	42.3215616429	494.6565672087
127.1560477950	42.3215616429	494.5521894239
127.1560601535	42.3215616429	494.4478116391
127.1560725119	42.3215616429	494.3434338542
127.1560848704	42.3215616429	494.2390560695
127.1560972289	42.3215616429	494.1346782846
127.1561095874	42.3215616429	494.0303004998
127.1561219458	42.3215616429	493.9259227150
127.1561343043	42.3215616429	493.8215449302
127.1561466628	42.3215616429	493.7171671453
127.1561590212	42.3215616429	493.6127893605
127.1561713797	42.3215616429	493.5084115757
127.1561837382	42.3215616429	493.4040337909
127.1561960966	42.3215616429	493.2996561336
127.1562084551	42.3215616429	493.1952786505
127.1562208136	42.3215616429	493.0909011673
127.1562331720	42.3215616429	492.9865236841
127.1562455305	42.3215616429	492.8821462009
127.1562578890	42.3215616429	492.7777687179
127.1562702474	42.3215616429	492.6733912347
127.1562826059	42.3215616429	492.5690134633
127.1562949644	42.3215616429	492.4646353769
127.1563073228	42.3215616429	492.3602572904
127.1563196813	42.3215616429	492.2558792039
127.1563320398	42.3215616429	492.1515011173
127.1563443982	42.3215616429	492.0471230309
127.1563567567	42.3215616429	491.9427449444
127.1563691152	42.3215616429	491.8383646784
127.1563814737	42.3215616429	491.7339824996
127.1563938321	42.3215616429	491.6296003206
127.1564061906	42.3215616429	491.5252181416
127.1564185491	42.3215616429	491.4208359627
127.1564309075	42.3215616429	491.3164537838
127.1564432660	42.3215616429	491.2120716048
127.1564556245	42.3215616429	491.0949115292
127.1564679829	42.3215616429	490.9687785573
127.1564803414	42.3215616429	490.8426455852
127.1564926999	42.3215616429	490.7165126131
127.1565050583	42.3215616429	490.5903796411
127.1565174168	42.3215616429	490.4642466690
127.1565297753	42.3215616429	490.3381136969
127.1565421337	42.3215616429	490.2119833537
127.1565544922	42.3215616429	490.0858544742
127.1565668507	42.3215616429	489.9597255946
127.1565792091	42.3215616429	489.8335967149
127.1565915676	42.3215616429	489.7074678355
127.1566039261	42.3215616429	489.5813389558
127.1566162846	42.3215616429	489.4552100762
127.1566286430	42.3215616429	489.3290811967
127.1566410015	42.3215616429	489.2029523170
127.1566533600	42.3215616429	489.0768234374
127.1566657184	42.3215616429	488.9506945578
127.1566780769	42.3215616429	488.8245656783
127.1566904354	42.3215616429	488.6984367986
127.1567027938	42.3215616429	488.5723079190
127.1567151523	42.3215616429	488.4461759612
127.1567275108	42.3215616429	488.3200429891
127.1567398692	42.3215616429	488.1939100170
127.1567522277	42.3215616429	488.0677770449
127.1567645862	42.3215616429	487.9416440729
127.1567769446	42.3215616429	487.8155111008
127.1567893031	42.3215616429	487.6893781287
127.1568016616	42.3215616429	487.5632517629
127.1568140200	42.3215616429	487.4371269757
127.1568263785	42.3215616429	487.3110021885
127.1568387370	42.3215616429	487.1848774013
127.1568510954	42.3215616429	487.0587526143
127.1568634539	42.3215616429	486.9326278271
127.1568758124	42.3215616429	486.8065030399
127.1568881709	42.3215616429	486.6803747251
127.1569005293	42.3215616429	486.5542458455
127.1569128878	42.3215616429	486.4281169658
127.1569252463	42.3215616429	486.3019880863
127.1569376047	42.3215616429	486.1758592067
127.1569499632	42.3215616429	486.0497303270
127.1569623217	42.3215616429	485.9236014474
127.1569746801	42.3215616429	485.7974725679
127.1569870386	42.3215616429	485.6713436883
127.1559736442	42.3215707411	494.9396959188
127.1559860027	42.3215707411	494.8360870788
127.1559983611	42.3215707411	494.7324782390
127.1560107196	42.3215707411	494.6288693990
127.1560230781	42.3215707411	494.5252618827
127.1560354365	42.3215707411	494.4216572728
127.1560477950	42.3215707411	494.3180526630
127.1560601535	42.3215707411	494.2144480530
127.1560725119	42.3215707411	494.1108434430
127.1560848704	42.3215707411	494.0072388332
127.1560972289	42.3215707411	493.9036342233
127.1561095874	42.3215707411	493.8000295529
127.1561219458	42.3215707411	493.6964247790
127.1561343043	42.3215707411	493.5928200049
127.1561466628	42.3215707411	493.4892152308
127.1561590212	42.3215707411	493.3856104568
127.1561713797	42.3215707411	493.2820056828
127.1561837382	42.3215707411	493.1784009087
127.1561960966	42.3215707411	493.0747962040
127.1562084551	42.3215707411	492.9711915942
127.1562208136	42.3215707411	492.8675869843
127.1562331720	42.3215707411	492.7639823743
127.1562455305	42.3215707411	492.6603777643
127.1562578890	42.3215707411	492.5567731545
127.1562702474	42.3215707411	492.4531685445
127.1562826059	42.3215707411	492.3495638562
127.1562949644	42.3215707411	492.2459590822
127.1563073228	42.3215707411	492.1423543082
127.1563196813	42.3215707411	492.0387495341
127.1563320398	42.3215707411	491.9351447600
127.1563443982	42.3215707411	491.8315399861
127.1563567567	42.3215707411	491.7279352120
127.1563691152	42.3215707411	491.6243282726
127.1563814737	42.3215707411	491.5207194328
127.1563938321	42.3215707411	491.4171105928
127.1564061906	42.3215707411	491.3135017528
127.1564185491	42.3215707411	491.2098929130
127.1564309075	42.3215707411	491.1062840730
127.1564432660	42.3215707411	491.0026752331
127.1564556245	42.3215707411	490.8860812108
127.1564679829	42.3215707411	490.7603687320
127.1564803414	42.3215707411	490.6346562530
127.1564926999	42.3215707411	490.5089437741
127.1565050583	42.3215707411	490.3832312953
127.1565174168	42.3215707411	490.2575188163
127.1565297753	42.3215707411	490.1318063373
127.1565421337	42.3215707411	490.0060965756
127.1565544922	42.3215707411	489.8803883268
127.1565668507	42.3215707411	489.7546800779
127.1565792091	42.3215707411	489.6289718289
127.1565915676	42.3215707411	489.5032635801
127.1566039261	42.3215707411	489.3775553311
127.1566162846	42.3215707411	489.2518470822
127.1566286430	42.3215707411	489.1261387189
127.1566410015	42.3215707411	489.0004303059
127.1566533600	42.3215707411	488.8747218928
127.1566657184	42.3215707411	488.7490134797
127.1566780769	42.3215707411	488.6233050668
127.1566904354	42.3215707411	488.4975966537
127.1567027938	42.3215707411	488.3718882406
127.1567151523	42.3215707411	488.2461766459
127.1567275108	42.3215707411	488.1204640028
127.1567398692	42.3215707411	487.9947513598
127.1567522277	42.3215707411	487.8690387167
127.1567645862	42.3215707411	487.7433260738
127.1567769446	42.3215707411	487.6176134307
127.1567893031	42.3215707411	487.4919007876
127.1568016616	42.3215707411	487.3661952377
127.1568140200	42.3215707411	487.2404913829
127.1568263785	42.3215707411	487.1147875280
127.1568387370	42.3215707411	486.9890836732
127.1568510954	42.3215707411	486.8633798185
127.1568634539	42.3215707411	486.7376759637
127.1568758124	42.3215707411	486.6119721088
127.1568881709	42.3215707411	486.4862643249
127.1569005293	42.3215707411	486.3605559118
127.1569128878	42.3215707411	486.2348474987
127.1569252463	42.3215707411	486.1091390858
127.1569376047	42.3215707411	485.9834306727
127.1569499632	42.3215707411	485.8577222597
127.1569623217	42.3215707411	485.7320138466
127.1569746801	42.3215707411	485.6063055841
127.1569870386	42.3215707411	485.4805973352
127.1559736442	42.3215798393	494.6876619304
127.1559860027	42.3215798393	494.5840535562
127.1559983611	42.3215798393	494.4804451822
127.1560107196	42.3215798393	494.3768368080
127.1560230781	42.3215798393	494.2732296117
127.1560354365	42.3215798393	494.1696250018
127.1560477950	42.3215798393	494.0660203919
127.1560601535	42.3215798393	493.9624157820
127.1560725119	42.3215798393	493.8588111720
127.1560848704	42.3215798393	493.7552065622
127.1560972289	42.3215798393	493.6516019522
127.1561095874	42.3215798393	493.5479971106
127.1561219458	42.3215798393	493.4443918708
127.1561343043	42.3215798393	493.3407866310
127.1561466628	42.3215798393	493.2371813911
127.1561590212	42.3215798393	493.1335761513
127.1561713797	42.3215798393	493.0299709115
127.1561837382	42.3215798393	492.9263656717
127.1561960966	42.3215798393	492.8227606981
127.1562084551	42.3215798393	492.7191560883
127.1562208136	42.3215798393	492.6155514783
127.1562331720	42.3215798393	492.5119468684
127.1562455305	42.3215798393	492.4083422584
127.1562578890	42.3215798393	492.3047376486
127.1562702474	42.3215798393	492.2011330386
127.1562826059	42.3215798393	492.0975281278
127.1562949644	42.3215798393	491.9939228880
127.1563073228	42.3215798393	491.8903176482
127.1563196813	42.3215798393	491.7867124083
127.1563320398	42.3215798393	491.6831071685
127.1563443982	42.3215798393	491.5795019287
127.1563567567	42.3215798393	491.4758966889
127.1563691152	42.3215798393	491.3722897798
127.1563814737	42.3215798393	491.2686814058
127.1563938321	42.3215798393	491.1650730316
127.1564061906	42.3215798393	491.0614646574
127.1564185491	42.3215798393	490.9578562833
127.1564309075	42.3215798393	490.8542479092
127.1564432660	42.3215798393	490.7506395350
127.1564556245	42.3215798393	490.6347473012
127.1564679829	42.3215798393	490.5102290937
127.1564803414	42.3215798393	490.3857108861
127.1564926999	42.3215798393	490.2611926786
127.1565050583	42.3215798393	490.1366744711
127.1565174168	42.3215798393	490.0121562635
127.1565297753	42.3215798393	489.8876380559
127.1565421337	42.3215798393	489.7631222664
127.1565544922	42.3215798393	489.6386078231
127.1565668507	42.3215798393	489.5140933798
127.1565792091	42.3215798393	489.3895789364
127.1565915676	42.3215798393	489.2650644932
127.1566039261	42.3215798393	489.1405500498
127.1566162846	42.3215798393	489.0160356064
127.1566286430	42.3215798393	488.8915207240
127.1566410015	42.3215798393	488.7670056507
127.1566533600	42.3215798393	488.6424905774
127.1566657184	42.3215798393	488.5179755042
127.1566780769	42.3215798393	488.3934604310
127.1566904354	42.3215798393	488.2689453578
127.1567027938	42.3215798393	488.1444302845
127.1567151523	42.3215798393	488.0199123799
127.1567275108	42.3215798393	487.8953935424
127.1567398692	42.3215798393	487.7708747049
127.1567522277	42.3215798393	487.6463558675
127.1567645862	42.3215798393	487.5218370301
127.1567769446	42.3215798393	487.3973181926
127.1567893031	42.3215798393	487.2727993551
127.1568016616	42.3215798393	487.1482876108
127.1568140200	42.3215798393	487.0237775615
127.1568263785	42.3215798393	486.8992675123
127.1568387370	42.3215798393	486.7747574630
127.1568510954	42.3215798393	486.6502474139
127.1568634539	42.3215798393	486.5257373647
127.1568758124	42.3215798393	486.4012273154
127.1568881709	42.3215798393	486.2767129356
127.1569005293	42.3215798393	486.1521978623
127.1569128878	42.3215798393	486.0276827890
127.1569252463	42.3215798393	485.9031677159
127.1569376047	42.3215798393	485.7786526426
127.1569499632	42.3215798393	485.6541375693
127.1569623217	42.3215798393	485.5296224961
127.1569746801	42.3215798393	485.4051080005
127.1569870386	42.3215798393	485.2805935571
127.1559736442	42.3215889375	494.4356279422
127.1559860027	42.3215889375	494.3320200338
127.1559983611	42.3215889375	494.2284121255
127.1560107196	42.3215889375	494.1248042171
127.1560230781	42.3215889375	494.0211973409
127.1560354365	42.3215889375	493.9175927309
127.1560477950	42.3215889375	493.8139881211
127.1560601535	42.3215889375	493.7103835112
127.1560725119	42.3215889375	493.6067789012
127.1560848704	42.3215889375	493.5031742914
127.1560972289	42.3215889375	493.3995696814
127.1561095874	42.3215889375	493.2959646684
127.1561219458	42.3215889375	493.1923589629
127.1561343043	42.3215889375	493.0887532573
127.1561466628	42.3215889375	492.9851475516
127.1561590212	42.3215889375	492.8815418460
127.1561713797	42.3215889375	492.7779361405
127.1561837382	42.3215889375	492.6743304348
127.1561960966	42.3215889375	492.5707251924
127.1562084551	42.3215889375	492.4671205825
127.1562208136	42.3215889375	492.3635159726
127.1562331720	42.3215889375	492.2599113626
127.1562455305	42.3215889375	492.1563067527
127.1562578890	42.3215889375	492.0527021428
127.1562702474	42.3215889375	491.9490975329
127.1562826059	42.3215889375	491.8454923996
127.1562949644	42.3215889375	491.7418866940
127.1563073228	42.3215889375	491.6382809884
127.1563196813	42.3215889375	491.5346752828
127.1563320398	42.3215889375	491.4310695771
127.1563443982	42.3215889375	491.3274638716
127.1563567567	42.3215889375	491.2238581660
127.1563691152	42.3215889375	491.1202512872
127.1563814737	42.3215889375	491.0166433789
127.1563938321	42.3215889375	490.9130354706
127.1564061906	42.3215889375	490.8094275622
127.1564185491	42.3215889375	490.7058196539
127.1564309075	42.3215889375	490.6022117455
127.1564432660	42.3215889375	490.4986038371
127.1564556245	42.3215889375	490.3834133917
127.1564679829	42.3215889375	490.2600894557
127.1564803414	42.3215889375	490.1367655194
127.1564926999	42.3215889375	490.0134415832
127.1565050583	42.3215889375	489.8901176471
127.1565174168	42.3215889375	489.7667937109
127.1565297753	42.3215889375	489.6434697747
127.1565421337	42.3215889375	489.5201479573
127.1565544922	42.3215889375	489.3968273197
127.1565668507	42.3215889375	489.2735066819
127.1565792091	42.3215889375	489.1501860441
127.1565915676	42.3215889375	489.0268654064
127.1566039261	42.3215889375	488.9035447687
127.1566162846	42.3215889375	488.7802241309
127.1566286430	42.3215889375	488.6569027292
127.1566410015	42.3215889375	488.5335809957
127.1566533600	42.3215889375	488.4102592623
127.1566657184	42.3215889375	488.2869375288
127.1566780769	42.3215889375	488.1636157955
127.1566904354	42.3215889375	488.0402940620
127.1567027938	42.3215889375	487.9169723285
127.1567151523	42.3215889375	487.7936481141
127.1567275108	42.3215889375	487.6703230822
127.1567398692	42.3215889375	487.5469980503
127.1567522277	42.3215889375	487.4236730184
127.1567645862	42.3215889375	487.3003479866
127.1567769446	42.3215889375	487.1770229547
127.1567893031	42.3215889375	487.0536979228
127.1568016616	42.3215889375	486.9303799841
127.1568140200	42.3215889375	486.8070637404
127.1568263785	42.3215889375	486.6837474967
127.1568387370	42.3215889375	486.5604312531
127.1568510954	42.3215889375	486.4371150095
127.1568634539	42.3215889375	486.3137987659
127.1568758124	42.3215889375	486.1904825222
127.1568881709	42.3215889375	486.0671615464
127.1569005293	42.3215889375	485.9438398129
127.1569128878	42.3215889375	485.8205180795
127.1569252463	42.3215889375	485.6971963461
127.1569376047	42.3215889375	485.5738746127
127.1569499632	42.3215889375	485.4505528792
127.1569623217	42.3215889375	485.3272311457
127.1569746801	42.3215889375	485.2039104170
127.1569870386	42.3215889375	485.0805897792
127.1559736442	42.3215980357	494.1835939538
127.1559860027	42.3215980357	494.0799865112
127.1559983611	42.3215980357	493.9763790687
127.1560107196	42.3215980357	493.8727716261
127.1560230781	42.3215980357	493.7691650699
127.1560354365	42.3215980357	493.6655604599
127.1560477950	42.3215980357	493.5619558501
127.1560601535	42.3215980357	493.4583512401
127.1560725119	42.3215980357	493.3547466302
127.1560848704	42.3215980357	493.2511420203
127.1560972289	42.3215980357	493.1475374104
127.1561095874	42.3215980357	493.0439322261
127.1561219458	42.3215980357	492.9403260548
127.1561343043	42.3215980357	492.8367198833
127.1561466628	42.3215980357	492.7331137119
127.1561590212	42.3215980357	492.6295075405
127.1561713797	42.3215980357	492.5259013692
127.1561837382	42.3215980357	492.4222951978
127.1561960966	42.3215980357	492.3186896864
127.1562084551	42.3215980357	492.2150850766
127.1562208136	42.3215980357	492.1114804666
127.1562331720	42.3215980357	492.0078758567
127.1562455305	42.3215980357	491.9042712467
127.1562578890	42.3215980357	491.8006666369
127.1562702474	42.3215980357	491.6970620269
127.1562826059	42.3215980357	491.5934566711
127.1562949644	42.3215980357	491.4898504998
127.1563073228	42.3215980357	491.3862443284
127.1563196813	42.3215980357	491.2826381570
127.1563320398	42.3215980357	491.1790319856
127.1563443982	42.3215980357	491.0754258143
127.1563567567	42.3215980357	490.9718196428
127.1563691152	42.3215980357	490.8682127944
127.1563814737	42.3215980357	490.7646053519
127.1563938321	42.3215980357	490.6609979093
127.1564061906	42.3215980357	490.5573904667
127.1564185491	42.3215980357	490.4537830242
127.1564309075	42.3215980357	490.3501755816
127.1564432660	42.3215980357	490.2465681390
127.1564556245	42.3215980357	490.1320794821
127.1564679829	42.3215980357	490.0099498174
127.1564803414	42.3215980357	489.8878201525
127.1564926999	42.3215980357	489.7656904877
127.1565050583	42.3215980357	489.6435608230
127.1565174168	42.3215980357	489.5214311581
127.1565297753	42.3215980357	489.3993014933
127.1565421337	42.3215980357	489.2771736480
127.1565544922	42.3215980357	489.1550468160
127.1565668507	42.3215980357	489.0329199838
127.1565792091	42.3215980357	488.9107931516
127.1565915676	42.3215980357	488.7886663195
127.1566039261	42.3215980357	488.6665394873
127.1566162846	42.3215980357	488.5444126551
127.1566286430	42.3215980357	488.4222847343
127.1566410015	42.3215980357	488.3001563406
127.1566533600	42.3215980357	488.1780279469
127.1566657184	42.3215980357	488.0558995532
127.1566780769	42.3215980357	487.9337711597
127.1566904354	42.3215980357	487.8116427660
127.1567027938	42.3215980357	487.6895143724
127.1567151523	42.3215980357	487.5673838481
127.1567275108	42.3215980357	487.4452526218
127.1567398692	42.3215980357	487.3231213955
127.1567522277	42.3215980357	487.2009901692
127.1567645862	42.3215980357	487.0788589430
127.1567769446	42.3215980357	486.9567277166
127.1567893031	42.3215980357	486.8345964903
127.1568016616	42.3215980357	486.7124723572
127.1568140200	42.3215980357	486.5903499191
127.1568263785	42.3215980357	486.4682274810
127.1568387370	42.3215980357	486.3461050429
127.1568510954	42.3215980357	486.2239826050
127.1568634539	42.3215980357	486.1018601669
127.1568758124	42.3215980357	485.9797377288
127.1568881709	42.3215980357	485.8576101571
127.1569005293	42.3215980357	485.7354817634
127.1569128878	42.3215980357	485.6133533697
127.1569252463	42.3215980357	485.4912249762
127.1569376047	42.3215980357	485.3690965825
127.1569499632	42.3215980357	485.2469681889
127.1569623217	42.3215980357	485.1248397952
127.1569746801	42.3215980357	485.0027128334
127.1569870386	42.3215980357	484.8805860012
127.1559736442	42.3216071339	493.9315599656
127.1559860027	42.3216071339	493.8279529888
127.1559983611	42.3216071339	493.7243460121
127.1560107196	42.3216071339	493.6207390352
127.1560230781	42.3216071339	493.5171327991
127.1560354365	42.3216071339	493.4135281891
127.1560477950	42.3216071339	493.3099235793
127.1560601535	42.3216071339	493.2063189693
127.1560725119	42.3216071339	493.1027143594
127.1560848704	42.3216071339	492.9991097495
127.1560972289	42.3216071339	492.8955051396
127.1561095874	42.3216071339	492.7918997839
127.1561219458	42.3216071339	492.6882931468
127.1561343043	42.3216071339	492.5846865096
127.1561466628	42.3216071339	492.4810798724
127.1561590212	42.3216071339	492.3774732352
127.1561713797	42.3216071339	492.2738665981
127.1561837382	42.3216071339	492.1702599609
127.1561960966	42.3216071339	492.0666541807
127.1562084551	42.3216071339	491.9630495709
127.1562208136	42.3216071339	491.8594449609
127.1562331720	42.3216071339	491.7558403509
127.1562455305	42.3216071339	491.6522357410
127.1562578890	42.3216071339	491.5486311312
127.1562702474	42.3216071339	491.4450265212
127.1562826059	42.3216071339	491.3414209429
127.1562949644	42.3216071339	491.2378143058
127.1563073228	42.3216071339	491.1342076686
127.1563196813	42.3216071339	491.0306010314
127.1563320398	42.3216071339	490.9269943942
127.1563443982	42.3216071339	490.8233877571
127.1563567567	42.3216071339	490.7197811199
127.1563691152	42.3216071339	490.6161743018
127.1563814737	42.3216071339	490.5125673251
127.1563938321	42.3216071339	490.4089603483
127.1564061906	42.3216071339	490.3053533715
127.1564185491	42.3216071339	490.2017463948
127.1564309075	42.3216071339	490.0981394179
127.1564432660	42.3216071339	489.9945324411
127.1564556245	42.3216071339	489.8807455727
127.1564679829	42.3216071339	489.7598101793
127.1564803414	42.3216071339	489.6388747858
127.1564926999	42.3216071339	489.5179393924
127.1565050583	42.3216071339	489.3970039990
127.1565174168	42.3216071339	489.2760686055
127.1565297753	42.3216071339	489.1551332120
127.1565421337	42.3216071339	489.0341993390
127.1565544922	42.3216071339	488.9132663125
127.1565668507	42.3216071339	488.7923332859
127.1565792091	42.3216071339	488.6714002593
127.1565915676	42.3216071339	488.5504672328
127.1566039261	42.3216071339	488.4295342062
127.1566162846	42.3216071339	488.3086011795
127.1566286430	42.3216071339	488.1876667395
127.1566410015	42.3216071339	488.0667316856
127.1566533600	42.3216071339	487.9457966317
127.1566657184	42.3216071339	487.8248615779
127.1566780769	42.3216071339	487.7039265241
127.1566904354	42.3216071339	487.5829914703
127.1567027938	42.3216071339	487.4620564164
127.1567151523	42.3216071339	487.3411195823
127.1567275108	42.3216071339	487.2201821616
127.1567398692	42.3216071339	487.0992447408
127.1567522277	42.3216071339	486.9783073201
127.1567645862	42.3216071339	486.8573698995
127.1567769446	42.3216071339	486.7364324787
127.1567893031	42.3216071339	486.6154950580
127.1568016616	42.3216071339	486.4945647304
127.1568140200	42.3216071339	486.3736360979
127.1568263785	42.3216071339	486.2527074654
127.1568387370	42.3216071339	486.1317788329
127.1568510954	42.3216071339	486.0108502006
127.1568634539	42.3216071339	485.8899215681
127.1568758124	42.3216071339	485.7689929356
127.1568881709	42.3216071339	485.6480587679
127.1569005293	42.3216071339	485.5271237141
127.1569128878	42.3216071339	485.4061886602
127.1569252463	42.3216071339	485.2852536064
127.1569376047	42.3216071339	485.1643185526
127.1569499632	42.3216071339	485.0433834987
127.1569623217	42.3216071339	484.9224484448
127.1569746801	42.3216071339	484.8015152499
127.1569870386	42.3216071339	484.6805822233
127.1559736442	42.3216162321	493.6795259772
127.1559860027	42.3216162321	493.5759194661
127.1559983611	42.3216162321	493.4723129552
127.1560107196	42.3216162321	493.3687064442
127.1560230781	42.3216162321	493.2651005280
127.1560354365	42.3216162321	493.1614959181
127.1560477950	42.3216162321	493.0578913082
127.1560601535	42.3216162321	492.9542866983
127.1560725119	42.3216162321	492.8506820883
127.1560848704	42.3216162321	492.7470774785
127.1560972289	42.3216162321	492.6434728685
127.1561095874	42.3216162321	492.5398673416
127.1561219458	42.3216162321	492.4362602387
127.1561343043	42.3216162321	492.3326531357
127.1561466628	42.3216162321	492.2290460327
127.1561590212	42.3216162321	492.1254389297
127.1561713797	42.3216162321	492.0218318268
127.1561837382	42.3216162321	491.9182247238
127.1561960966	42.3216162321	491.8146186748
127.1562084551	42.3216162321	491.7110140649
127.1562208136	42.3216162321	491.6074094550
127.1562331720	42.3216162321	491.5038048450
127.1562455305	42.3216162321	491.4002002350
127.1562578890	42.3216162321	491.2965956252
127.1562702474	42.3216162321	491.1929910153
127.1562826059	42.3216162321	491.0893852145
127.1562949644	42.3216162321	490.9857781116
127.1563073228	42.3216162321	490.8821710086
127.1563196813	42.3216162321	490.7785639056
127.1563320398	42.3216162321	490.6749568026
127.1563443982	42.3216162321	490.5713496998
127.1563567567	42.3216162321	490.4677425968
127.1563691152	42.3216162321	490.3641358090
127.1563814737	42.3216162321	490.2605292981
127.1563938321	42.3216162321	490.1569227871
127.1564061906	42.3216162321	490.0533162760
127.1564185491	42.3216162321	489.9497097651
127.1564309075	42.3216162321	489.8461032541
127.1564432660	42.3216162321	489.7424967430
127.1564556245	42.3216162321	489.6294116631
127.1564679829	42.3216162321	489.5096705411
127.1564803414	42.3216162321	489.3899294190
127.1564926999	42.3216162321	489.2701882968
127.1565050583	42.3216162321	489.1504471749
127.1565174168	42.3216162321	489.0307060527
127.1565297753	42.3216162321	488.9109649306
127.1565421337	42.3216162321	488.7912250297
127.1565544922	42.3216162321	488.6714858088
127.1565668507	42.3216162321	488.5517465878
127.1565792091	42.3216162321	488.4320073668
127.1565915676	42.3216162321	488.3122681459
127.1566039261	42.3216162321	488.1925289248
127.1566162846	42.3216162321	488.0727897038
127.1566286430	42.3216162321	487.9530487445
127.1566410015	42.3216162321	487.8333070305
127.1566533600	42.3216162321	487.7135653164
127.1566657184	42.3216162321	487.5938236023
127.1566780769	42.3216162321	487.4740818884
127.1566904354	42.3216162321	487.3543401743
127.1567027938	42.3216162321	487.2345984602
127.1567151523	42.3216162321	487.1148553163
127.1567275108	42.3216162321	486.9951117012
127.1567398692	42.3216162321	486.8753680860
127.1567522277	42.3216162321	486.7556244709
127.1567645862	42.3216162321	486.6358808558
127.1567769446	42.3216162321	486.5161372407
127.1567893031	42.3216162321	486.3963936255
127.1568016616	42.3216162321	486.2766571035
127.1568140200	42.3216162321	486.1569222766
127.1568263785	42.3216162321	486.0371874497
127.1568387370	42.3216162321	485.9174526228
127.1568510954	42.3216162321	485.7977177960
127.1568634539	42.3216162321	485.6779829691
127.1568758124	42.3216162321	485.5582481422
127.1568881709	42.3216162321	485.4385073786
127.1569005293	42.3216162321	485.3187656645
127.1569128878	42.3216162321	485.1990239505
127.1569252463	42.3216162321	485.0792822365
127.1569376047	42.3216162321	484.9595405225
127.1569499632	42.3216162321	484.8397988084
127.1569623217	42.3216162321	484.7200570943
127.1569746801	42.3216162321	484.6003176663
127.1569870386	42.3216162321	484.4805784453
127.1559736442	42.3216253303	493.4274919888
127.1559860027	42.3216253303	493.3238859435
127.1559983611	42.3216253303	493.2202798984
127.1560107196	42.3216253303	493.1166738531
127.1560230781	42.3216253303	493.0130682570
127.1560354365	42.3216253303	492.9094636471
127.1560477950	42.3216253303	492.8058590372
127.1560601535	42.3216253303	492.7022544273
127.1560725119	42.3216253303	492.5986498173
127.1560848704	42.3216253303	492.4950452075
127.1560972289	42.3216253303	492.3914405975
127.1561095874	42.3216253303	492.2878348992
127.1561219458	42.3216253303	492.1842273306
127.1561343043	42.3216253303	492.0806197618
127.1561466628	42.3216253303	491.9770121930
127.1561590212	42.3216253303	491.8734046242
127.1561713797	42.3216253303	491.7697970556
127.1561837382	42.3216253303	491.6661894868
127.1561960966	42.3216253303	491.5625831688
127.1562084551	42.3216253303	491.4589785590
127.1562208136	42.3216253303	491.3553739490
127.1562331720	42.3216253303	491.2517693391
127.1562455305	42.3216253303	491.1481647291
127.1562578890	42.3216253303	491.0445601193
127.1562702474	42.3216253303	490.9409555093
127.1562826059	42.3216253303	490.8373494861
127.1562949644	42.3216253303	490.7337419174
127.1563073228	42.3216253303	490.6301343486
127.1563196813	42.3216253303	490.5265267799
127.1563320398	42.3216253303	490.4229192111
127.1563443982	42.3216253303	490.3193116424
127.1563567567	42.3216253303	490.2157040736
127.1563691152	42.3216253303	490.1120973162
127.1563814737	42.3216253303	490.0084912711
127.1563938321	42.3216253303	489.9048852258
127.1564061906	42.3216253303	489.8012791806
127.1564185491	42.3216253303	489.6976731355
127.1564309075	42.3216253303	489.5940670902
127.1564432660	42.3216253303	489.4904610449
127.1564556245	42.3216253303	489.3780777534
127.1564679829	42.3216253303	489.2595309028
127.1564803414	42.3216253303	489.1409840521
127.1564926999	42.3216253303	489.0224372013
127.1565050583	42.3216253303	488.9038903507
127.1565174168	42.3216253303	488.7853435000
127.1565297753	42.3216253303	488.6667966492
127.1565421337	42.3216253303	488.5482507205
127.1565544922	42.3216253303	488.4297053052
127.1565668507	42.3216253303	488.3111598897
127.1565792091	42.3216253303	488.1926144743
127.1565915676	42.3216253303	488.0740690589
127.1566039261	42.3216253303	487.9555236435
127.1566162846	42.3216253303	487.8369782280
127.1566286430	42.3216253303	487.7184307496
127.1566410015	42.3216253303	487.5998823753
127.1566533600	42.3216253303	487.4813340010
127.1566657184	42.3216253303	487.3627856268
127.1566780769	42.3216253303	487.2442372526
127.1566904354	42.3216253303	487.1256888784
127.1567027938	42.3216253303	487.0071405041
127.1567151523	42.3216253303	486.8885910503
127.1567275108	42.3216253303	486.7700412408
127.1567398692	42.3216253303	486.6514914312
127.1567522277	42.3216253303	486.5329416216
127.1567645862	42.3216253303	486.4143918122
127.1567769446	42.3216253303	486.2958420026
127.1567893031	42.3216253303	486.1772921930
127.1568016616	42.3216253303	486.0587494766
127.1568140200	42.3216253303	485.9402084553
127.1568263785	42.3216253303	485.8216674340
127.1568387370	42.3216253303	485.7031264126
127.1568510954	42.3216253303	485.5845853915
127.1568634539	42.3216253303	485.4660443701
127.1568758124	42.3216253303	485.3475033488
127.1568881709	42.3216253303	485.2289559893
127.1569005293	42.3216253303	485.1104076150
127.1569128878	42.3216253303	484.9918592407
127.1569252463	42.3216253303	484.8733108666
127.1569376047	42.3216253303	484.7547624923
127.1569499632	42.3216253303	484.6362141181
127.1569623217	42.3216253303	484.5176657438
127.1569746801	42.3216253303	484.3991200827
127.1569870386	42.3216253303	484.2805746672
127.1559736442	42.3216344285	493.1754580006
127.1559860027	42.3216344285	493.0718524211
127.1559983611	42.3216344285	492.9682468417
127.1560107196	42.3216344285	492.8646412623
127.1560230781	42.3216344285	492.7610359862
127.1560354365	42.3216344285	492.6574313762
127.1560477950	42.3216344285	492.5538267664
127.1560601535	42.3216344285	492.4502221564
127.1560725119	42.3216344285	492.3466175465
127.1560848704	42.3216344285	492.2430129367
127.1560972289	42.3216344285	492.1394083267
127.1561095874	42.3216344285	492.0358024571
127.1561219458	42.3216344285	491.9321944226
127.1561343043	42.3216344285	491.8285863881
127.1561466628	42.3216344285	491.7249783535
127.1561590212	42.3216344285	491.6213703189
127.1561713797	42.3216344285	491.5177622845
127.1561837382	42.3216344285	491.4141542499
127.1561960966	42.3216344285	491.3105476631
127.1562084551	42.3216344285	491.2069430532
127.1562208136	42.3216344285	491.1033384433
127.1562331720	42.3216344285	490.9997338333
127.1562455305	42.3216344285	490.8961292234
127.1562578890	42.3216344285	490.7925246135
127.1562702474	42.3216344285	490.6889200036
127.1562826059	42.3216344285	490.5853137579
127.1562949644	42.3216344285	490.4817057234
127.1563073228	42.3216344285	490.3780976889
127.1563196813	42.3216344285	490.2744896543
127.1563320398	42.3216344285	490.1708816197
127.1563443982	42.3216344285	490.0672735853
127.1563567567	42.3216344285	489.9636655507
127.1563691152	42.3216344285	489.8600588236
127.1563814737	42.3216344285	489.7564532443
127.1563938321	42.3216344285	489.6528476648
127.1564061906	42.3216344285	489.5492420853
127.1564185491	42.3216344285	489.4456365060
127.1564309075	42.3216344285	489.3420309265
127.1564432660	42.3216344285	489.2384253471
127.1564556245	42.3216344285	489.1267438440
127.1564679829	42.3216344285	489.0093912647
127.1564803414	42.3216344285	488.8920386854
127.1564926999	42.3216344285	488.7746861060
127.1565050583	42.3216344285	488.6573335267
127.1565174168	42.3216344285	488.5399809474
127.1565297753	42.3216344285	488.4226283680
127.1565421337	42.3216344285	488.3052764114
127.1565544922	42.3216344285	488.1879248017
127.1565668507	42.3216344285	488.0705731918
127.1565792091	42.3216344285	487.9532215819
127.1565915676	42.3216344285	487.8358699722
127.1566039261	42.3216344285	487.7185183623
127.1566162846	42.3216344285	487.6011667525
127.1566286430	42.3216344285	487.4838127548
127.1566410015	42.3216344285	487.3664577203
127.1566533600	42.3216344285	487.2491026859
127.1566657184	42.3216344285	487.1317476514
127.1566780769	42.3216344285	487.0143926171
127.1566904354	42.3216344285	486.8970375826
127.1567027938	42.3216344285	486.7796825481
127.1567151523	42.3216344285	486.6623267845
127.1567275108	42.3216344285	486.5449707805
127.1567398692	42.3216344285	486.4276147765
127.1567522277	42.3216344285	486.3102587726
127.1567645862	42.3216344285	486.1929027687
127.1567769446	42.3216344285	486.0755467647
127.1567893031	42.3216344285	485.9581907607
127.1568016616	42.3216344285	485.8408418499
127.1568140200	42.3216344285	485.7234946342
127.1568263785	42.3216344285	485.6061474184
127.1568387370	42.3216344285	485.4888002027
127.1568510954	42.3216344285	485.3714529871
127.1568634539	42.3216344285	485.2541057713
127.1568758124	42.3216344285	485.1367585556
127.1568881709	42.3216344285	485.0194046001
127.1569005293	42.3216344285	484.9020495657
127.1569128878	42.3216344285	484.7846945312
127.1569252463	42.3216344285	484.6673394968
127.1569376047	42.3216344285	484.5499844624
127.1569499632	42.3216344285	484.4326294279
127.1569623217	42.3216344285	484.3152743934
127.1569746801	42.3216344285	484.1979224992
127.1569870386	42.3216344285	484.0805708893
127.1559736442	42.3216435267	492.9234240122
127.1559860027	42.3216435267	492.8198188985
127.1559983611	42.3216435267	492.7162137849
127.1560107196	42.3216435267	492.6126086712
127.1560230781	42.3216435267	492.5090037152
127.1560354365	42.3216435267	492.4053991052
127.1560477950	42.3216435267	492.3017944954
127.1560601535	42.3216435267	492.1981898854
127.1560725119	42.3216435267	492.0945852755
127.1560848704	42.3216435267	491.9909806656
127.1560972289	42.3216435267	491.8873760557
127.1561095874	42.3216435267	491.7837700147
127.1561219458	42.3216435267	491.6801615145
127.1561343043	42.3216435267	491.5765530141
127.1561466628	42.3216435267	491.4729445138
127.1561590212	42.3216435267	491.3693360134
127.1561713797	42.3216435267	491.2657275132
127.1561837382	42.3216435267	491.1621190129
127.1561960966	42.3216435267	491.0585121571
127.1562084551	42.3216435267	490.9549075473
127.1562208136	42.3216435267	490.8513029373
127.1562331720	42.3216435267	490.7476983274
127.1562455305	42.3216435267	490.6440937174
127.1562578890	42.3216435267	490.5404891076
127.1562702474	42.3216435267	490.4368844976
127.1562826059	42.3216435267	490.3332780294
127.1562949644	42.3216435267	490.2296695292
127.1563073228	42.3216435267	490.1260610289
127.1563196813	42.3216435267	490.0224525285
127.1563320398	42.3216435267	489.9188440282
127.1563443982	42.3216435267	489.8152355279
127.1563567567	42.3216435267	489.7116270276
127.1563691152	42.3216435267	489.6080203308
127.1563814737	42.3216435267	489.5044152173
127.1563938321	42.3216435267	489.4008101036
127.1564061906	42.3216435267	489.2972049899
127.1564185491	42.3216435267	489.1935998763
127.1564309075	42.3216435267	489.0899947627
127.1564432660	42.3216435267	488.9863896490
127.1564556245	42.3216435267	488.8754099344
127.1564679829	42.3216435267	488.7592516265
127.1564803414	42.3216435267	488.6430933185
127.1564926999	42.3216435267	488.5269350105
127.1565050583	42.3216435267	488.4107767026
127.1565174168	42.3216435267	488.2946183946
127.1565297753	42.3216435267	488.1784600866
127.1565421337	42.3216435267	488.0623021021
127.1565544922	42.3216435267	487.9461442980
127.1565668507	42.3216435267	487.8299864937
127.1565792091	42.3216435267	487.7138286894
127.1565915676	42.3216435267	487.5976708853
127.1566039261	42.3216435267	487.4815130810
127.1566162846	42.3216435267	487.3653552767
127.1566286430	42.3216435267	487.2491947599
127.1566410015	42.3216435267	487.1330330652
127.1566533600	42.3216435267	487.0168713705
127.1566657184	42.3216435267	486.9007096758
127.1566780769	42.3216435267	486.7845479813
127.1566904354	42.3216435267	486.6683862866
127.1567027938	42.3216435267	486.5522245920
127.1567151523	42.3216435267	486.4360625185
127.1567275108	42.3216435267	486.3199003201
127.1567398692	42.3216435267	486.2037381217
127.1567522277	42.3216435267	486.0875759233
127.1567645862	42.3216435267	485.9714137250
127.1567769446	42.3216435267	485.8552515266
127.1567893031	42.3216435267	485.7390893282
127.1568016616	42.3216435267	485.6229342230
127.1568140200	42.3216435267	485.5067808128
127.1568263785	42.3216435267	485.3906274027
127.1568387370	42.3216435267	485.2744739925
127.1568510954	42.3216435267	485.1583205825
127.1568634539	42.3216435267	485.0421671723
127.1568758124	42.3216435267	484.9260137622
127.1568881709	42.3216435267	484.8098532108
127.1569005293	42.3216435267	484.6936915161
127.1569128878	42.3216435267	484.5775298215
127.1569252463	42.3216435267	484.4613681269
127.1569376047	42.3216435267	484.3452064323
127.1569499632	42.3216435267	484.2290447376
127.1569623217	42.3216435267	484.1128830429
127.1569746801	42.3216435267	483.9967249156
127.1569870386	42.3216435267	483.8805671113
127.1559736442	42.3216526249	492.6713900240
127.1559860027	42.3216526249	492.5677853761
127.1559983611	42.3216526249	492.4641807283
127.1560107196	42.3216526249	492.3605760804
127.1560230781	42.3216526249	492.2569714443
127.1560354365	42.3216526249	492.1533668344
127.1560477950	42.3216526249	492.0497622246
127.1560601535	42.3216526249	491.9461576146
127.1560725119	42.3216526249	491.8425530046
127.1560848704	42.3216526249	491.7389483948
127.1560972289	42.3216526249	491.6353437849
127.1561095874	42.3216526249	491.5317375726
127.1561219458	42.3216526249	491.4281286065
127.1561343043	42.3216526249	491.3245196404
127.1561466628	42.3216526249	491.2209106743
127.1561590212	42.3216526249	491.1173017081
127.1561713797	42.3216526249	491.0136927421
127.1561837382	42.3216526249	490.9100837760
127.1561960966	42.3216526249	490.8064766514
127.1562084551	42.3216526249	490.7028720416
127.1562208136	42.3216526249	490.5992674316
127.1562331720	42.3216526249	490.4956628217
127.1562455305	42.3216526249	490.3920582117
127.1562578890	42.3216526249	490.2884536019
127.1562702474	42.3216526249	490.1848489919
127.1562826059	42.3216526249	490.0812423012
127.1562949644	42.3216526249	489.9776333352
127.1563073228	42.3216526249	489.8740243691
127.1563196813	42.3216526249	489.7704154029
127.1563320398	42.3216526249	489.6668064368
127.1563443982	42.3216526249	489.5631974708
127.1563567567	42.3216526249	489.4595885047
127.1563691152	42.3216526249	489.3559818382
127.1563814737	42.3216526249	489.2523771905
127.1563938321	42.3216526249	489.1487725426
127.1564061906	42.3216526249	489.0451678947
127.1564185491	42.3216526249	488.9415632469
127.1564309075	42.3216526249	488.8379585990
127.1564432660	42.3216526249	488.7343539511
127.1564556245	42.3216526249	488.6240760249
127.1564679829	42.3216526249	488.5091119884
127.1564803414	42.3216526249	488.3941479518
127.1564926999	42.3216526249	488.2791839151
127.1565050583	42.3216526249	488.1642198786
127.1565174168	42.3216526249	488.0492558420
127.1565297753	42.3216526249	487.9342918053
127.1565421337	42.3216526249	487.8193277931
127.1565544922	42.3216526249	487.7043637945
127.1565668507	42.3216526249	487.5893997958
127.1565792091	42.3216526249	487.4744357971
127.1565915676	42.3216526249	487.3594717985
127.1566039261	42.3216526249	487.2445077999
127.1566162846	42.3216526249	487.1295438012
127.1566286430	42.3216526249	487.0145767651
127.1566410015	42.3216526249	486.8996084102
127.1566533600	42.3216526249	486.7846400553
127.1566657184	42.3216526249	486.6696717005
127.1566780769	42.3216526249	486.5547033457
127.1566904354	42.3216526249	486.4397349909
127.1567027938	42.3216526249	486.3247666360
127.1567151523	42.3216526249	486.2097982527
127.1567275108	42.3216526249	486.0948298599
127.1567398692	42.3216526249	485.9798614671
127.1567522277	42.3216526249	485.8648930743
127.1567645862	42.3216526249	485.7499246816
127.1567769446	42.3216526249	485.6349562888
127.1567893031	42.3216526249	485.5199878959
127.1568016616	42.3216526249	485.4050265963
127.1568140200	42.3216526249	485.2900669917
127.1568263785	42.3216526249	485.1751073871
127.1568387370	42.3216526249	485.0601477825
127.1568510954	42.3216526249	484.9451881781
127.1568634539	42.3216526249	484.8302285735
127.1568758124	42.3216526249	484.7152689690
127.1568881709	42.3216526249	484.6003018217
127.1569005293	42.3216526249	484.4853334668
127.1569128878	42.3216526249	484.3703651119
127.1569252463	42.3216526249	484.2553967572
127.1569376047	42.3216526249	484.1404284023
127.1569499632	42.3216526249	484.0254600474
127.1569623217	42.3216526249	483.9104916925
127.1569746801	42.3216526249	483.7955273321
127.1569870386	42.3216526249	483.6805633334
127.1559736442	42.3216617231	492.4193576130
127.1559860027	42.3216617231	492.3157530031
127.1559983611	42.3216617231	492.2121483932
127.1560107196	42.3216617231	492.1085437833
127.1560230781	42.3216617231	492.0049390394
127.1560354365	42.3216617231	491.9013340017
127.1560477950	42.3216617231	491.7977289640
127.1560601535	42.3216617231	491.6941239262
127.1560725119	42.3216617231	491.5905188884
127.1560848704	42.3216617231	491.4869138507
127.1560972289	42.3216617231	491.3833088129
127.1561095874	42.3216617231	491.2797023162
127.1561219458	42.3216617231	491.1760933122
127.1561343043	42.3216617231	491.0724843082
127.1561466628	42.3216617231	490.9688753041
127.1561590212	42.3216617231	490.8652663000
127.1561713797	42.3216617231	490.7616572960
127.1561837382	42.3216617231	490.6580482920
127.1561960966	42.3216617231	490.5544411455
127.1562084551	42.3216617231	490.4508365356
127.1562208136	42.3216617231	490.3472319257
127.1562331720	42.3216617231	490.2436273157
127.1562455305	42.3216617231	490.1400227058
127.1562578890	42.3216617231	490.0364180959
127.1562702474	42.3216617231	489.9328134860
127.1562826059	42.3216617231	489.8292069815
127.1562949644	42.3216617231	489.7255984054
127.1563073228	42.3216617231	489.6219898292
127.1563196813	42.3216617231	489.5183812529
127.1563320398	42.3216617231	489.4147726767
127.1563443982	42.3216617231	489.3111641006
127.1563567567	42.3216617231	489.2075555243
127.1563691152	42.3216617231	489.1039488325
127.1563814737	42.3216617231	489.0003437948
127.1563938321	42.3216617231	488.8967387570
127.1564061906	42.3216617231	488.7931337193
127.1564185491	42.3216617231	488.6895286816
127.1564309075	42.3216617231	488.5859236438
127.1564432660	42.3216617231	488.4823186060
127.1564556245	42.3216617231	488.3727418639
127.1564679829	42.3216617231	488.2589716710
127.1564803414	42.3216617231	488.1452014779
127.1564926999	42.3216617231	488.0314312847
127.1565050583	42.3216617231	487.9176610918
127.1565174168	42.3216617231	487.8038908987
127.1565297753	42.3216617231	487.6901207055
127.1565421337	42.3216617231	487.5763505124
127.1565544922	42.3216617231	487.4625803194
127.1565668507	42.3216617231	487.3488101263
127.1565792091	42.3216617231	487.2350399332
127.1565915676	42.3216617231	487.1212697402
127.1566039261	42.3216617231	487.0074995471
127.1566162846	42.3216617231	486.8937293540
127.1566286430	42.3216617231	486.7799560971
127.1566410015	42.3216617231	486.6661815099
127.1566533600	42.3216617231	486.5524069226
127.1566657184	42.3216617231	486.4386323354
127.1566780769	42.3216617231	486.3248577483
127.1566904354	42.3216617231	486.2110831611
127.1567027938	42.3216617231	486.0973085738
127.1567151523	42.3216617231	485.9835343085
127.1567275108	42.3216617231	485.8697601491
127.1567398692	42.3216617231	485.7559859897
127.1567522277	42.3216617231	485.6422118304
127.1567645862	42.3216617231	485.5284376711
127.1567769446	42.3216617231	485.4146635117
127.1567893031	42.3216617231	485.3008893523
127.1568016616	42.3216617231	485.1871215954
127.1568140200	42.3216617231	485.0733553686
127.1568263785	42.3216617231	484.9595891418
127.1568387370	42.3216617231	484.8458229150
127.1568510954	42.3216617231	484.7320566883
127.1568634539	42.3216617231	484.6182904614
127.1568758124	42.3216617231	484.5045242346
127.1568881709	42.3216617231	484.3907508011
127.1569005293	42.3216617231	484.2769762139
127.1569128878	42.3216617231	484.1632016267
127.1569252463	42.3216617231	484.0494270396
127.1569376047	42.3216617231	483.9356524523
127.1569499632	42.3216617231	483.8218778651
127.1569623217	42.3216617231	483.7081032779
127.1569746801	42.3216617231	483.5943323275
127.1569870386	42.3216617231	483.4805617066
127.1559736442	42.3216708213	492.1673253422
127.1559860027	42.3216708213	492.0637207322
127.1559983611	42.3216708213	491.9601161224
127.1560107196	42.3216708213	491.8565115125
127.1560230781	42.3216708213	491.7529066229
127.1560354365	42.3216708213	491.6493011193
127.1560477950	42.3216708213	491.5456956158
127.1560601535	42.3216708213	491.4420901122
127.1560725119	42.3216708213	491.3384846087
127.1560848704	42.3216708213	491.2348791052
127.1560972289	42.3216708213	491.1312736016
127.1561095874	42.3216708213	491.0276668105
127.1561219458	42.3216708213	490.9240578065
127.1561343043	42.3216708213	490.8204488024
127.1561466628	42.3216708213	490.7168397983
127.1561590212	42.3216708213	490.6132307943
127.1561713797	42.3216708213	490.5096217903
127.1561837382	42.3216708213	490.4060127862
127.1561960966	42.3216708213	490.3024056397
127.1562084551	42.3216708213	490.1988010299
127.1562208136	42.3216708213	490.0951964199
127.1562331720	42.3216708213	489.9915918100
127.1562455305	42.3216708213	489.8879872000
127.1562578890	42.3216708213	489.7843825902
127.1562702474	42.3216708213	489.6807779802
127.1562826059	42.3216708213	489.5771716983
127.1562949644	42.3216708213	489.4735635879
127.1563073228	42.3216708213	489.3699554775
127.1563196813	42.3216708213	489.2663473670
127.1563320398	42.3216708213	489.1627392566
127.1563443982	42.3216708213	489.0591311462
127.1563567567	42.3216708213	488.9555230358
127.1563691152	42.3216708213	488.8519163136
127.1563814737	42.3216708213	488.7483108102
127.1563938321	42.3216708213	488.6447053066
127.1564061906	42.3216708213	488.5410998030
127.1564185491	42.3216708213	488.4374942996
127.1564309075	42.3216708213	488.3338887960
127.1564432660	42.3216708213	488.2302832924
127.1564556245	42.3216708213	488.1214076809
127.1564679829	42.3216708213	488.0088312935
127.1564803414	42.3216708213	487.8962549060
127.1564926999	42.3216708213	487.7836785184
127.1565050583	42.3216708213	487.6711021310
127.1565174168	42.3216708213	487.5585257435
127.1565297753	42.3216708213	487.4459493560
127.1565421337	42.3216708213	487.3333729684
127.1565544922	42.3216708213	487.2207965810
127.1565668507	42.3216708213	487.1082201935
127.1565792091	42.3216708213	486.9956438060
127.1565915676	42.3216708213	486.8830674186
127.1566039261	42.3216708213	486.7704910311
127.1566162846	42.3216708213	486.6579146435
127.1566286430	42.3216708213	486.5453351922
127.1566410015	42.3216708213	486.4327544105
127.1566533600	42.3216708213	486.3201736289
127.1566657184	42.3216708213	486.2075928472
127.1566780769	42.3216708213	486.0950120657
127.1566904354	42.3216708213	485.9824312841
127.1567027938	42.3216708213	485.8698505024
127.1567151523	42.3216708213	485.7572703931
127.1567275108	42.3216708213	485.6446905051
127.1567398692	42.3216708213	485.5321106170
127.1567522277	42.3216708213	485.4195307290
127.1567645862	42.3216708213	485.3069508411
127.1567769446	42.3216708213	485.1943709531
127.1567893031	42.3216708213	485.0817910651
127.1568016616	42.3216708213	484.9692168277
127.1568140200	42.3216708213	484.8566439407
127.1568263785	42.3216708213	484.7440710536
127.1568387370	42.3216708213	484.6314981666
127.1568510954	42.3216708213	484.5189252797
127.1568634539	42.3216708213	484.4063523927
127.1568758124	42.3216708213	484.2937795056
127.1568881709	42.3216708213	484.1811998135
127.1569005293	42.3216708213	484.0686190318
127.1569128878	42.3216708213	483.9560382502
127.1569252463	42.3216708213	483.8434574687
127.1569376047	42.3216708213	483.7308766870
127.1569499632	42.3216708213	483.6182959054
127.1569623217	42.3216708213	483.5057151237
127.1569746801	42.3216708213	483.3931375519
127.1569870386	42.3216708213	483.2805602707
127.1559736442	42.3216799195	491.9152930712
127.1559860027	42.3216799195	491.8116884612
127.1559983611	42.3216799195	491.7080838514
127.1560107196	42.3216799195	491.6044792414
127.1560230781	42.3216799195	491.5008742061
127.1560354365	42.3216799195	491.3972682367
127.1560477950	42.3216799195	491.2936622675
127.1560601535	42.3216799195	491.1900562981
127.1560725119	42.3216799195	491.0864503288
127.1560848704	42.3216799195	490.9828443595
127.1560972289	42.3216799195	490.8792383901
127.1561095874	42.3216799195	490.7756313045
127.1561219458	42.3216799195	490.6720223006
127.1561343043	42.3216799195	490.5684132965
127.1561466628	42.3216799195	490.4648042924
127.1561590212	42.3216799195	490.3611952883
127.1561713797	42.3216799195	490.2575862844
127.1561837382	42.3216799195	490.1539772803
127.1561960966	42.3216799195	490.0503701338
127.1562084551	42.3216799195	489.9467655240
127.1562208136	42.3216799195	489.8431609140
127.1562331720	42.3216799195	489.7395563040
127.1562455305	42.3216799195	489.6359516941
127.1562578890	42.3216799195	489.5323470842
127.1562702474	42.3216799195	489.4287424743
127.1562826059	42.3216799195	489.3251364148
127.1562949644	42.3216799195	489.2215287703
127.1563073228	42.3216799195	489.1179211256
127.1563196813	42.3216799195	489.0143134809
127.1563320398	42.3216799195	488.9107058362
127.1563443982	42.3216799195	488.8070981917
127.1563567567	42.3216799195	488.7034905470
127.1563691152	42.3216799195	488.5998837946
127.1563814737	42.3216799195	488.4962778253
127.1563938321	42.3216799195	488.3926718559
127.1564061906	42.3216799195	488.2890658866
127.1564185491	42.3216799195	488.1854599173
127.1564309075	42.3216799195	488.0818539480
127.1564432660	42.3216799195	487.9782479786
127.1564556245	42.3216799195	487.8700734976
127.1564679829	42.3216799195	487.7586909158
127.1564803414	42.3216799195	487.6473083339
127.1564926999	42.3216799195	487.5359257519
127.1565050583	42.3216799195	487.4245431701
127.1565174168	42.3216799195	487.3131605882
127.1565297753	42.3216799195	487.2017780062
127.1565421337	42.3216799195	487.0903954243
127.1565544922	42.3216799195	486.9790128425
127.1565668507	42.3216799195	486.8676302605
127.1565792091	42.3216799195	486.7562476786
127.1565915676	42.3216799195	486.6448650968
127.1566039261	42.3216799195	486.5334825148
127.1566162846	42.3216799195	486.4220999329
127.1566286430	42.3216799195	486.3107142871
127.1566410015	42.3216799195	486.1993273110
127.1566533600	42.3216799195	486.0879403350
127.1566657184	42.3216799195	485.9765533589
127.1566780769	42.3216799195	485.8651663830
127.1566904354	42.3216799195	485.7537794069
127.1567027938	42.3216799195	485.6423924308
127.1567151523	42.3216799195	485.5310064774
127.1567275108	42.3216799195	485.4196208608
127.1567398692	42.3216799195	485.3082352441
127.1567522277	42.3216799195	485.1968496275
127.1567645862	42.3216799195	485.0854640110
127.1567769446	42.3216799195	484.9740783943
127.1567893031	42.3216799195	484.8626927776
127.1568016616	42.3216799195	484.7513120598
127.1568140200	42.3216799195	484.6399325125
127.1568263785	42.3216799195	484.5285529653
127.1568387370	42.3216799195	484.4171734181
127.1568510954	42.3216799195	484.3057938710
127.1568634539	42.3216799195	484.1944143238
127.1568758124	42.3216799195	484.0830347765
127.1568881709	42.3216799195	483.9716488257
127.1569005293	42.3216799195	483.8602618496
127.1569128878	42.3216799195	483.7488748736
127.1569252463	42.3216799195	483.6374878976
127.1569376047	42.3216799195	483.5261009216
127.1569499632	42.3216799195	483.4147139455
127.1569623217	42.3216799195	483.3033269694
127.1569746801	42.3216799195	483.1919427761
127.1569870386	42.3216799195	483.0805588347
127.1559736442	42.3216890177	491.6632608002
127.1559860027	42.3216890177	491.5596561902
127.1559983611	42.3216890177	491.4560515804
127.1560107196	42.3216890177	491.3524469704
127.1560230781	42.3216890177	491.2488417893
127.1560354365	42.3216890177	491.1452353542
127.1560477950	42.3216890177	491.0416289191
127.1560601535	42.3216890177	490.9380224840
127.1560725119	42.3216890177	490.8344160488
127.1560848704	42.3216890177	490.7308096138
127.1560972289	42.3216890177	490.6272031787
127.1561095874	42.3216890177	490.5235957986
127.1561219458	42.3216890177	490.4199867946
127.1561343043	42.3216890177	490.3163777905
127.1561466628	42.3216890177	490.2127687865
127.1561590212	42.3216890177	490.1091597824
127.1561713797	42.3216890177	490.0055507784
127.1561837382	42.3216890177	489.9019417744
127.1561960966	42.3216890177	489.7983346279
127.1562084551	42.3216890177	489.6947300180
127.1562208136	42.3216890177	489.5911254081
127.1562331720	42.3216890177	489.4875207981
127.1562455305	42.3216890177	489.3839161881
127.1562578890	42.3216890177	489.2803115783
127.1562702474	42.3216890177	489.1767069684
127.1562826059	42.3216890177	489.0731011313
127.1562949644	42.3216890177	488.9694939526
127.1563073228	42.3216890177	488.8658867737
127.1563196813	42.3216890177	488.7622795948
127.1563320398	42.3216890177	488.6586724159
127.1563443982	42.3216890177	488.5550652372
127.1563567567	42.3216890177	488.4514580583
127.1563691152	42.3216890177	488.3478512755
127.1563814737	42.3216890177	488.2442448404
127.1563938321	42.3216890177	488.1406384053
127.1564061906	42.3216890177	488.0370319702
127.1564185491	42.3216890177	487.9334255351
127.1564309075	42.3216890177	487.8298191000
127.1564432660	42.3216890177	487.7262126648
127.1564556245	42.3216890177	487.6187393143
127.1564679829	42.3216890177	487.5085505381
127.1564803414	42.3216890177	487.3983617618
127.1564926999	42.3216890177	487.2881729854
127.1565050583	42.3216890177	487.1779842092
127.1565174168	42.3216890177	487.0677954328
127.1565297753	42.3216890177	486.9576066565
127.1565421337	42.3216890177	486.8474178801
127.1565544922	42.3216890177	486.7372291039
127.1565668507	42.3216890177	486.6270403275
127.1565792091	42.3216890177	486.5168515512
127.1565915676	42.3216890177	486.4066627749
127.1566039261	42.3216890177	486.2964739986
127.1566162846	42.3216890177	486.1862852222
127.1566286430	42.3216890177	486.0760933820
127.1566410015	42.3216890177	485.9659002115
127.1566533600	42.3216890177	485.8557070411
127.1566657184	42.3216890177	485.7455138706
127.1566780769	42.3216890177	485.6353207002
127.1566904354	42.3216890177	485.5251275297
127.1567027938	42.3216890177	485.4149343593
127.1567151523	42.3216890177	485.3047425618
127.1567275108	42.3216890177	485.1945512165
127.1567398692	42.3216890177	485.0843598712
127.1567522277	42.3216890177	484.9741685260
127.1567645862	42.3216890177	484.8639771808
127.1567769446	42.3216890177	484.7537858355
127.1567893031	42.3216890177	484.6435944902
127.1568016616	42.3216890177	484.5334072918
127.1568140200	42.3216890177	484.4232210844
127.1568263785	42.3216890177	484.3130348770
127.1568387370	42.3216890177	484.2028486696
127.1568510954	42.3216890177	484.0926624623
127.1568634539	42.3216890177	483.9824762548
127.1568758124	42.3216890177	483.8722900474
127.1568881709	42.3216890177	483.7620978379
127.1569005293	42.3216890177	483.6519046674
127.1569128878	42.3216890177	483.5417114969
127.1569252463	42.3216890177	483.4315183266
127.1569376047	42.3216890177	483.3213251561
127.1569499632	42.3216890177	483.2111319856
127.1569623217	42.3216890177	483.1009388151
127.1569746801	42.3216890177	482.9907480003
127.1569870386	42.3216890177	482.8805573987
127.1559736442	42.3216981159	491.4112285293
127.1559860027	42.3216981159	491.3076239194
127.1559983611	42.3216981159	491.2040193095
127.1560107196	42.3216981159	491.1004146996
127.1560230781	42.3216981159	490.9968093727
127.1560354365	42.3216981159	490.8932024718
127.1560477950	42.3216981159	490.7895955710
127.1560601535	42.3216981159	490.6859886701
127.1560725119	42.3216981159	490.5823817691
127.1560848704	42.3216981159	490.4787748683
127.1560972289	42.3216981159	490.3751679674
127.1561095874	42.3216981159	490.2715602928
127.1561219458	42.3216981159	490.1679512889
127.1561343043	42.3216981159	490.0643422848
127.1561466628	42.3216981159	489.9607332807
127.1561590212	42.3216981159	489.8571242766
127.1561713797	42.3216981159	489.7535152727
127.1561837382	42.3216981159	489.6499062686
127.1561960966	42.3216981159	489.5462991221
127.1562084551	42.3216981159	489.4426945123
127.1562208136	42.3216981159	489.3390899023
127.1562331720	42.3216981159	489.2354852924
127.1562455305	42.3216981159	489.1318806824
127.1562578890	42.3216981159	489.0282760726
127.1562702474	42.3216981159	488.9246714626
127.1562826059	42.3216981159	488.8210658481
127.1562949644	42.3216981159	488.7174591351
127.1563073228	42.3216981159	488.6138524220
127.1563196813	42.3216981159	488.5102457089
127.1563320398	42.3216981159	488.4066389958
127.1563443982	42.3216981159	488.3030322828
127.1563567567	42.3216981159	488.1994255697
127.1563691152	42.3216981159	488.0958187566
127.1563814737	42.3216981159	487.9922118558
127.1563938321	42.3216981159	487.8886049548
127.1564061906	42.3216981159	487.7849980539
127.1564185491	42.3216981159	487.6813911531
127.1564309075	42.3216981159	487.5777842522
127.1564432660	42.3216981159	487.4741773512
127.1564556245	42.3216981159	487.3674051313
127.1564679829	42.3216981159	487.2584101606
127.1564803414	42.3216981159	487.1494151899
127.1564926999	42.3216981159	487.0404202191
127.1565050583	42.3216981159	486.9314252484
127.1565174168	42.3216981159	486.8224302777
127.1565297753	42.3216981159	486.7134353069
127.1565421337	42.3216981159	486.6044403361
127.1565544922	42.3216981159	486.4954453655
127.1565668507	42.3216981159	486.3864503947
127.1565792091	42.3216981159	486.2774554239
127.1565915676	42.3216981159	486.1684604533
127.1566039261	42.3216981159	486.0594654825
127.1566162846	42.3216981159	485.9504705117
127.1566286430	42.3216981159	485.8414724771
127.1566410015	42.3216981159	485.7324731122
127.1566533600	42.3216981159	485.6234737473
127.1566657184	42.3216981159	485.5144743824
127.1566780769	42.3216981159	485.4054750177
127.1566904354	42.3216981159	485.2964756528
127.1567027938	42.3216981159	485.1874762879
127.1567151523	42.3216981159	485.0784786464
127.1567275108	42.3216981159	484.9694815724
127.1567398692	42.3216981159	484.8604844985
127.1567522277	42.3216981159	484.7514874246
127.1567645862	42.3216981159	484.6424903508
127.1567769446	42.3216981159	484.5334932769
127.1567893031	42.3216981159	484.4244962030
127.1568016616	42.3216981159	484.3155025241
127.1568140200	42.3216981159	484.2065096565
127.1568263785	42.3216981159	484.0975167888
127.1568387370	42.3216981159	483.9885239212
127.1568510954	42.3216981159	483.8795310537
127.1568634539	42.3216981159	483.7705381861
127.1568758124	42.3216981159	483.6615453185
127.1568881709	42.3216981159	483.5525468502
127.1569005293	42.3216981159	483.4435474853
127.1569128878	42.3216981159	483.3345481204
127.1569252463	42.3216981159	483.2255487557
127.1569376047	42.3216981159	483.1165493908
127.1569499632	42.3216981159	483.0075500259
127.1569623217	42.3216981159	482.8985506610
127.1569746801	42.3216981159	482.7895532246
127.1569870386	42.3216981159	482.6805559629
127.1559736442	42.3217072141	491.1591962583
127.1559860027	42.3217072141	491.0555916484
127.1559983611	42.3217072141	490.9519870385
127.1560107196	42.3217072141	490.8483824286
127.1560230781	42.3217072141	490.7447769560
127.1560354365	42.3217072141	490.6411695892
127.1560477950	42.3217072141	490.5375622226
127.1560601535	42.3217072141	490.4339548559
127.1560725119	42.3217072141	490.3303474892
127.1560848704	42.3217072141	490.2267401226
127.1560972289	42.3217072141	490.1231327559
127.1561095874	42.3217072141	490.0195247869
127.1561219458	42.3217072141	489.9159157829
127.1561343043	42.3217072141	489.8123067789
127.1561466628	42.3217072141	489.7086977748
127.1561590212	42.3217072141	489.6050887707
127.1561713797	42.3217072141	489.5014797668
127.1561837382	42.3217072141	489.3978707627
127.1561960966	42.3217072141	489.2942636162
127.1562084551	42.3217072141	489.1906590063
127.1562208136	42.3217072141	489.0870543964
127.1562331720	42.3217072141	488.9834497864
127.1562455305	42.3217072141	488.8798451765
127.1562578890	42.3217072141	488.7762405666
127.1562702474	42.3217072141	488.6726359567
127.1562826059	42.3217072141	488.5690305646
127.1562949644	42.3217072141	488.4654243174
127.1563073228	42.3217072141	488.3618180701
127.1563196813	42.3217072141	488.2582118228
127.1563320398	42.3217072141	488.1546055755
127.1563443982	42.3217072141	488.0509993283
127.1563567567	42.3217072141	487.9473930810
127.1563691152	42.3217072141	487.8437862375
127.1563814737	42.3217072141	487.7401788709
127.1563938321	42.3217072141	487.6365715042
127.1564061906	42.3217072141	487.5329641375
127.1564185491	42.3217072141	487.4293567709
127.1564309075	42.3217072141	487.3257494042
127.1564432660	42.3217072141	487.2221420375
127.1564556245	42.3217072141	487.1160709480
127.1564679829	42.3217072141	487.0082697829
127.1564803414	42.3217072141	486.9004686178
127.1564926999	42.3217072141	486.7926674526
127.1565050583	42.3217072141	486.6848662875
127.1565174168	42.3217072141	486.5770651223
127.1565297753	42.3217072141	486.4692639571
127.1565421337	42.3217072141	486.3614627919
127.1565544922	42.3217072141	486.2536616269
127.1565668507	42.3217072141	486.1458604617
127.1565792091	42.3217072141	486.0380592965
127.1565915676	42.3217072141	485.9302581314
127.1566039261	42.3217072141	485.8224569662
127.1566162846	42.3217072141	485.7146558011
127.1566286430	42.3217072141	485.6068515720
127.1566410015	42.3217072141	485.4990460127
127.1566533600	42.3217072141	485.3912404534
127.1566657184	42.3217072141	485.2834348941
127.1566780769	42.3217072141	485.1756293349
127.1566904354	42.3217072141	485.0678237756
127.1567027938	42.3217072141	484.9600182163
127.1567151523	42.3217072141	484.8522147307
127.1567275108	42.3217072141	484.7444119282
127.1567398692	42.3217072141	484.6366091256
127.1567522277	42.3217072141	484.5288063231
127.1567645862	42.3217072141	484.4210035207
127.1567769446	42.3217072141	484.3132007181
127.1567893031	42.3217072141	484.2053979156
127.1568016616	42.3217072141	484.0975977562
127.1568140200	42.3217072141	483.9897982283
127.1568263785	42.3217072141	483.8819987005
127.1568387370	42.3217072141	483.7741991727
127.1568510954	42.3217072141	483.6663996450
127.1568634539	42.3217072141	483.5586001172
127.1568758124	42.3217072141	483.4508005893
127.1568881709	42.3217072141	483.3429958624
127.1569005293	42.3217072141	483.2351903031
127.1569128878	42.3217072141	483.1273847438
127.1569252463	42.3217072141	483.0195791846
127.1569376047	42.3217072141	482.9117736253
127.1569499632	42.3217072141	482.8039680660
127.1569623217	42.3217072141	482.6961625067
127.1569746801	42.3217072141	482.5883584488
127.1569870386	42.3217072141	482.4805545269
127.1559736442	42.3217163123	490.9071639875
127.1559860027	42.3217163123	490.8035593775
127.1559983611	42.3217163123	490.6999547677
127.1560107196	42.3217163123	490.5963501577
127.1560230781	42.3217163123	490.4927445394
127.1560354365	42.3217163123	490.3891367069
127.1560477950	42.3217163123	490.2855288745
127.1560601535	42.3217163123	490.1819210420
127.1560725119	42.3217163123	490.0783132095
127.1560848704	42.3217163123	489.9747053771
127.1560972289	42.3217163123	489.8710975446
127.1561095874	42.3217163123	489.7674892812
127.1561219458	42.3217163123	489.6638802772
127.1561343043	42.3217163123	489.5602712731
127.1561466628	42.3217163123	489.4566622690
127.1561590212	42.3217163123	489.3530532650
127.1561713797	42.3217163123	489.2494442610
127.1561837382	42.3217163123	489.1458352569
127.1561960966	42.3217163123	489.0422281104
127.1562084551	42.3217163123	488.9386235006
127.1562208136	42.3217163123	488.8350188906
127.1562331720	42.3217163123	488.7314142807
127.1562455305	42.3217163123	488.6278096707
127.1562578890	42.3217163123	488.5242050609
127.1562702474	42.3217163123	488.4206004509
127.1562826059	42.3217163123	488.3169952814
127.1562949644	42.3217163123	488.2133895000
127.1563073228	42.3217163123	488.1097837184
127.1563196813	42.3217163123	488.0061779369
127.1563320398	42.3217163123	487.9025721554
127.1563443982	42.3217163123	487.7989663740
127.1563567567	42.3217163123	487.6953605924
127.1563691152	42.3217163123	487.5917537186
127.1563814737	42.3217163123	487.4881458863
127.1563938321	42.3217163123	487.3845380537
127.1564061906	42.3217163123	487.2809302212
127.1564185491	42.3217163123	487.1773223889
127.1564309075	42.3217163123	487.0737145564
127.1564432660	42.3217163123	486.9701067239
127.1564556245	42.3217163123	486.8647367649
127.1564679829	42.3217163123	486.7581294055
127.1564803414	42.3217163123	486.6515220459
127.1564926999	42.3217163123	486.5449146863
127.1565050583	42.3217163123	486.4383073268
127.1565174168	42.3217163123	486.3316999672
127.1565297753	42.3217163123	486.2250926076
127.1565421337	42.3217163123	486.1184852480
127.1565544922	42.3217163123	486.0118778885
127.1565668507	42.3217163123	485.9052705289
127.1565792091	42.3217163123	485.7986631693
127.1565915676	42.3217163123	485.6920558098
127.1566039261	42.3217163123	485.5854484502
127.1566162846	42.3217163123	485.4788410906
127.1566286430	42.3217163123	485.3722306671
127.1566410015	42.3217163123	485.2656189134
127.1566533600	42.3217163123	485.1590071597
127.1566657184	42.3217163123	485.0523954060
127.1566780769	42.3217163123	484.9457836524
127.1566904354	42.3217163123	484.8391718986
127.1567027938	42.3217163123	484.7325601449
127.1567151523	42.3217163123	484.6259508153
127.1567275108	42.3217163123	484.5193422841
127.1567398692	42.3217163123	484.4127337529
127.1567522277	42.3217163123	484.3061252217
127.1567645862	42.3217163123	484.1995166907
127.1567769446	42.3217163123	484.0929081595
127.1567893031	42.3217163123	483.9862996283
127.1568016616	42.3217163123	483.8796929884
127.1568140200	42.3217163123	483.7730868004
127.1568263785	42.3217163123	483.6664806124
127.1568387370	42.3217163123	483.5598744243
127.1568510954	42.3217163123	483.4532682364
127.1568634539	42.3217163123	483.3466620484
127.1568758124	42.3217163123	483.2400558604
127.1568881709	42.3217163123	483.1334448748
127.1569005293	42.3217163123	483.0268331210
127.1569128878	42.3217163123	482.9202213673
127.1569252463	42.3217163123	482.8136096137
127.1569376047	42.3217163123	482.7069978600
127.1569499632	42.3217163123	482.6003861063
127.1569623217	42.3217163123	482.4937743525
127.1569746801	42.3217163123	482.3871636732
127.1569870386	42.3217163123	482.2805530910
127.1559736442	42.3217254105	490.6551317165
127.1559860027	42.3217254105	490.5515271065
127.1559983611	42.3217254105	490.4479224967
127.1560107196	42.3217254105	490.3443178867
127.1560230781	42.3217254105	490.2407121226
127.1560354365	42.3217254105	490.1371038243
127.1560477950	42.3217254105	490.0334955262
127.1560601535	42.3217254105	489.9298872279
127.1560725119	42.3217254105	489.8262789296
127.1560848704	42.3217254105	489.7226706314
127.1560972289	42.3217254105	489.6190623331
127.1561095874	42.3217254105	489.5154537752
127.1561219458	42.3217254105	489.4118447713
127.1561343043	42.3217254105	489.3082357672
127.1561466628	42.3217254105	489.2046267631
127.1561590212	42.3217254105	489.1010177590
127.1561713797	42.3217254105	488.9974087551
127.1561837382	42.3217254105	488.8937997510
127.1561960966	42.3217254105	488.7901926045
127.1562084551	42.3217254105	488.6865879947
127.1562208136	42.3217254105	488.5829833847
127.1562331720	42.3217254105	488.4793787748
127.1562455305	42.3217254105	488.3757741648
127.1562578890	42.3217254105	488.2721695550
127.1562702474	42.3217254105	488.1685649450
127.1562826059	42.3217254105	488.0649599979
127.1562949644	42.3217254105	487.9613546823
127.1563073228	42.3217254105	487.8577493666
127.1563196813	42.3217254105	487.7541440508
127.1563320398	42.3217254105	487.6505387351
127.1563443982	42.3217254105	487.5469334194
127.1563567567	42.3217254105	487.4433281037
127.1563691152	42.3217254105	487.3397211996
127.1563814737	42.3217254105	487.2361129014
127.1563938321	42.3217254105	487.1325046031
127.1564061906	42.3217254105	487.0288963048
127.1564185491	42.3217254105	486.9252880066
127.1564309075	42.3217254105	486.8216797084
127.1564432660	42.3217254105	486.7180714101
127.1564556245	42.3217254105	486.6134025817
127.1564679829	42.3217254105	486.5079890278
127.1564803414	42.3217254105	486.4025754738
127.1564926999	42.3217254105	486.2971619197
127.1565050583	42.3217254105	486.1917483658
127.1565174168	42.3217254105	486.0863348118
127.1565297753	42.3217254105	485.9809212578
127.1565421337	42.3217254105	485.8755077038
127.1565544922	42.3217254105	485.7700941499
127.1565668507	42.3217254105	485.6646805959
127.1565792091	42.3217254105	485.5592670418
127.1565915676	42.3217254105	485.4538534879
127.1566039261	42.3217254105	485.3484399339
127.1566162846	42.3217254105	485.2430263799
127.1566286430	42.3217254105	485.1376097621
127.1566410015	42.3217254105	485.0321918139
127.1566533600	42.3217254105	484.9267738658
127.1566657184	42.3217254105	484.8213559176
127.1566780769	42.3217254105	484.7159379696
127.1566904354	42.3217254105	484.6105200215
127.1567027938	42.3217254105	484.5051020733
127.1567151523	42.3217254105	484.3996868996
127.1567275108	42.3217254105	484.2942726398
127.1567398692	42.3217254105	484.1888583800
127.1567522277	42.3217254105	484.0834441202
127.1567645862	42.3217254105	483.9780298605
127.1567769446	42.3217254105	483.8726156007
127.1567893031	42.3217254105	483.7672013409
127.1568016616	42.3217254105	483.6617882205
127.1568140200	42.3217254105	483.5563753723
127.1568263785	42.3217254105	483.4509625240
127.1568387370	42.3217254105	483.3455496758
127.1568510954	42.3217254105	483.2401368277
127.1568634539	42.3217254105	483.1347239795
127.1568758124	42.3217254105	483.0293111313
127.1568881709	42.3217254105	482.9238938870
127.1569005293	42.3217254105	482.8184759388
127.1569128878	42.3217254105	482.7130579907
127.1569252463	42.3217254105	482.6076400427
127.1569376047	42.3217254105	482.5022220945
127.1569499632	42.3217254105	482.3968041464
127.1569623217	42.3217254105	482.2913861982
127.1569746801	42.3217254105	482.1859688974
127.1569870386	42.3217254105	482.0805516550
127.1559736442	42.3217345087	490.4030994456
127.1559860027	42.3217345087	490.2994948357
127.1559983611	42.3217345087	490.1958902259
127.1560107196	42.3217345087	490.0922856159
127.1560230781	42.3217345087	489.9886797060
127.1560354365	42.3217345087	489.8850709420
127.1560477950	42.3217345087	489.7814621780
127.1560601535	42.3217345087	489.6778534139
127.1560725119	42.3217345087	489.5742446499
127.1560848704	42.3217345087	489.4706358859
127.1560972289	42.3217345087	489.3670271218
127.1561095874	42.3217345087	489.2634182695
127.1561219458	42.3217345087	489.1598092655
127.1561343043	42.3217345087	489.0562002615
127.1561466628	42.3217345087	488.9525912574
127.1561590212	42.3217345087	488.8489822533
127.1561713797	42.3217345087	488.7453732493
127.1561837382	42.3217345087	488.6417642453
127.1561960966	42.3217345087	488.5381570988
127.1562084551	42.3217345087	488.4345524889
127.1562208136	42.3217345087	488.3309478790
127.1562331720	42.3217345087	488.2273432690
127.1562455305	42.3217345087	488.1237386591
127.1562578890	42.3217345087	488.0201340492
127.1562702474	42.3217345087	487.9165294393
127.1562826059	42.3217345087	487.8129247147
127.1562949644	42.3217345087	487.7093198648
127.1563073228	42.3217345087	487.6057150149
127.1563196813	42.3217345087	487.5021101649
127.1563320398	42.3217345087	487.3985053149
127.1563443982	42.3217345087	487.2949004651
127.1563567567	42.3217345087	487.1912956151
127.1563691152	42.3217345087	487.0876886807
127.1563814737	42.3217345087	486.9840799167
127.1563938321	42.3217345087	486.8804711527
127.1564061906	42.3217345087	486.7768623886
127.1564185491	42.3217345087	486.6732536246
127.1564309075	42.3217345087	486.5696448606
127.1564432660	42.3217345087	486.4660360965
127.1564556245	42.3217345087	486.3620683986
127.1564679829	42.3217345087	486.2578486503
127.1564803414	42.3217345087	486.1536289019
127.1564926999	42.3217345087	486.0494091534
127.1565050583	42.3217345087	485.9451894051
127.1565174168	42.3217345087	485.8409696567
127.1565297753	42.3217345087	485.7367499082
127.1565421337	42.3217345087	485.6325301598
127.1565544922	42.3217345087	485.5283104115
127.1565668507	42.3217345087	485.4240906630
127.1565792091	42.3217345087	485.3198709146
127.1565915676	42.3217345087	485.2156511663
127.1566039261	42.3217345087	485.1114314179
127.1566162846	42.3217345087	485.0072116694
127.1566286430	42.3217345087	484.9029888572
127.1566410015	42.3217345087	484.7987647146
127.1566533600	42.3217345087	484.6945405720
127.1566657184	42.3217345087	484.5903164295
127.1566780769	42.3217345087	484.4860922870
127.1566904354	42.3217345087	484.3818681445
127.1567027938	42.3217345087	484.2776440019
127.1567151523	42.3217345087	484.1734229842
127.1567275108	42.3217345087	484.0692029957
127.1567398692	42.3217345087	483.9649830073
127.1567522277	42.3217345087	483.8607630189
127.1567645862	42.3217345087	483.7565430305
127.1567769446	42.3217345087	483.6523230421
127.1567893031	42.3217345087	483.5481030537
127.1568016616	42.3217345087	483.4438834528
127.1568140200	42.3217345087	483.3396639443
127.1568263785	42.3217345087	483.2354444359
127.1568387370	42.3217345087	483.1312249275
127.1568510954	42.3217345087	483.0270054192
127.1568634539	42.3217345087	482.9227859107
127.1568758124	42.3217345087	482.8185664023
127.1568881709	42.3217345087	482.7143428993
127.1569005293	42.3217345087	482.6101187568
127.1569128878	42.3217345087	482.5058946142
127.1569252463	42.3217345087	482.4016704718
127.1569376047	42.3217345087	482.2974463292
127.1569499632	42.3217345087	482.1932221867
127.1569623217	42.3217345087	482.0889980441
127.1569746801	42.3217345087	481.9847741217
127.1569870386	42.3217345087	481.8805502192
127.1559736442	42.3217436069	490.1510656066
127.1559860027	42.3217436069	490.0474609966
127.1559983611	42.3217436069	489.9438563868
127.1560107196	42.3217436069	489.8402517768
127.1560230781	42.3217436069	489.7366457919
127.1560354365	42.3217436069	489.6330367878
127.1560477950	42.3217436069	489.5294277838
127.1560601535	42.3217436069	489.4258187797
127.1560725119	42.3217436069	489.3222097757
127.1560848704	42.3217436069	489.2186007717
127.1560972289	42.3217436069	489.1149917676
127.1561095874	42.3217436069	489.0113828466
127.1561219458	42.3217436069	488.9077740684
127.1561343043	42.3217436069	488.8041652901
127.1561466628	42.3217436069	488.7005565118
127.1561590212	42.3217436069	488.5969477335
127.1561713797	42.3217436069	488.4933389553
127.1561837382	42.3217436069	488.3897301770
127.1561960966	42.3217436069	488.2861231609
127.1562084551	42.3217436069	488.1825185510
127.1562208136	42.3217436069	488.0789139411
127.1562331720	42.3217436069	487.9753093311
127.1562455305	42.3217436069	487.8717047212
127.1562578890	42.3217436069	487.7681001113
127.1562702474	42.3217436069	487.6644955014
127.1562826059	42.3217436069	487.5608907836
127.1562949644	42.3217436069	487.4572859480
127.1563073228	42.3217436069	487.3536811122
127.1563196813	42.3217436069	487.2500762765
127.1563320398	42.3217436069	487.1464714408
127.1563443982	42.3217436069	487.0428666051
127.1563567567	42.3217436069	486.9392617694
127.1563691152	42.3217436069	486.8356547138
127.1563814737	42.3217436069	486.7320457098
127.1563938321	42.3217436069	486.6284367058
127.1564061906	42.3217436069	486.5248277017
127.1564185491	42.3217436069	486.4212186977
127.1564309075	42.3217436069	486.3176096936
127.1564432660	42.3217436069	486.2140006896
127.1564556245	42.3217436069	486.1103942669
127.1564679829	42.3217436069	486.0067896571
127.1564803414	42.3217436069	485.9031850471
127.1564926999	42.3217436069	485.7995804371
127.1565050583	42.3217436069	485.6959758273
127.1565174168	42.3217436069	485.5923712174
127.1565297753	42.3217436069	485.4887666074
127.1565421337	42.3217436069	485.3851619974
127.1565544922	42.3217436069	485.2815573876
127.1565668507	42.3217436069	485.1779527776
127.1565792091	42.3217436069	485.0743481677
127.1565915676	42.3217436069	484.9707435579
127.1566039261	42.3217436069	484.8671389479
127.1566162846	42.3217436069	484.7635343379
127.1566286430	42.3217436069	484.6599268216
127.1566410015	42.3217436069	484.5563180433
127.1566533600	42.3217436069	484.4527092650
127.1566657184	42.3217436069	484.3491004867
127.1566780769	42.3217436069	484.2454917085
127.1566904354	42.3217436069	484.1418829302
127.1567027938	42.3217436069	484.0382741519
127.1567151523	42.3217436069	483.9346683393
127.1567275108	42.3217436069	483.8310635036
127.1567398692	42.3217436069	483.7274586678
127.1567522277	42.3217436069	483.6238538321
127.1567645862	42.3217436069	483.5202489965
127.1567769446	42.3217436069	483.4166441607
127.1567893031	42.3217436069	483.3130393250
127.1568016616	42.3217436069	483.2094346716
127.1568140200	42.3217436069	483.1058300617
127.1568263785	42.3217436069	483.0022254517
127.1568387370	42.3217436069	482.8986208418
127.1568510954	42.3217436069	482.7950162319
127.1568634539	42.3217436069	482.6914116220
127.1568758124	42.3217436069	482.5878070120
127.1568881709	42.3217436069	482.4841986144
127.1569005293	42.3217436069	482.3805896103
127.1569128878	42.3217436069	482.2769806062
127.1569252463	42.3217436069	482.1733716023
127.1569376047	42.3217436069	482.0697625982
127.1569499632	42.3217436069	481.9661535941
127.1569623217	42.3217436069	481.8625445900
127.1569746801	42.3217436069	481.7589357931
127.1569870386	42.3217436069	481.6553270148
127.1559736442	42.3217527051	489.8990301008
127.1559860027	42.3217527051	489.7954254909
127.1559983611	42.3217527051	489.6918208811
127.1560107196	42.3217527051	489.5882162711
127.1560230781	42.3217527051	489.4846102861
127.1560354365	42.3217527051	489.3810012820
127.1560477950	42.3217527051	489.2773922781
[truncated: 5,637 more rows]
