# Supplementary material for: Simulation Study on Coverage Path Planning of Autonomous Tasks in Hilly Farmland Based on Energy Consumption Model
Source: Hindawi journal article supplement (doi:10.1155/2020/4535734), 2020-08-30
Supplement: f1 [file 4535734.f1.zip › 4535734.f1/Algorithm-pathplanning-matlab/2020.04.25/0909/2.csv]

Longitude	Latitude	Elevation
127.1563507995	42.3223622845	0.0000000000
127.1562520696	42.3221755234	0.0000000000
127.1562746479	42.3220921856	0.0000000000
127.1562098419	42.3220154634	0.0000000000
127.1561077176	42.3218698105	0.0000000000
127.1559941192	42.3217846573	0.0000000000
127.1559736442	42.3216998639	0.0000000000
127.1560667888	42.3216148366	0.0000000000
127.1562646013	42.3215343483	0.0000000000
127.1563845327	42.3215547757	0.0000000000
127.1564680146	42.3216683826	0.0000000000
127.1565538527	42.3217669944	0.0000000000
127.1565855252	42.3218476263	0.0000000000
127.1569870386	42.3220967301	0.0000000000
127.1568781044	42.3221752750	0.0000000000
127.1563507995	42.3223622845	0.0000000000
