# Supplementary material for: Simulation Study on Coverage Path Planning of Autonomous Tasks in Hilly Farmland Based on Energy Consumption Model
Source: Hindawi journal article supplement (doi:10.1155/2020/4535734), 2020-08-30
Supplement: f1 [file 4535734.f1.zip › 4535734.f1/Algorithm-pathplanning-matlab/between_farm/edge2pathes.m]

function pathes = edge2pathes(edges)
% edges ÐÎÈç[x1. y1; x2, y2;...]µÄ±ß½çµãÁÐ±í
edges_cycle = [edges; edges(1, :)];
points_from = edges_cycle(1:end - 1, :);
points_to = edges_cycle(2: end, :);
pathes = [points_from, points_to];
end
