# Supplementary material for: Simulation Study on Coverage Path Planning of Autonomous Tasks in Hilly Farmland Based on Energy Consumption Model
Source: Hindawi journal article supplement (doi:10.1155/2020/4535734), 2020-08-30
Supplement: f1 [file 4535734.f1.zip › 4535734.f1/Algorithm-pathplanning-matlab/corrosion.m]

function [ polygonNew ] = corrosion( polygon, omega, r, theta)
% Magic. Don't know how it works

polygon = getPoly(polygon);
[m, n] = size(polygon);
pre = polygon(1,:);
polygonNew = zeros(m-1, n);


lines = zeros(m, 3);

for i = 2:m
    now = polygon(i,:);
    l = getABC(pre, now);
    a = l(1);
    b = l(2);
    c = l(3);
    l1 = [a, b, c];
    lines(i-1,:) = l1;
    pre = now;
end

lines(m, :) = lines(1, :);
d = (r .* (1 + abs(cos(theta - atan(lines(:, 2) ./ lines(:, 1))))) + (omega / 2)) .* sqrt(lines(:,1).^2+lines(:,2).^2);

lines(:,3) = lines(:,3) - d;
preLine = lines(1,:);
flag = 1;
for i = 2:m
    now = lines(i,:);
    [px, py] = jiaodian(now, preLine);
    p = [px, py];
    if ~inPoly(p, polygon)
        flag = 0;
        break;
    end
    polygonNew(i-1,:) = p;
    preLine = now;
end
if ~flag
    lines(:,3) = lines(:,3) + 2 * d;
    preLine = lines(1,:);
    for i = 2:m
        now = lines(i,:);
        [px, py] = jiaodian(now, preLine);
        p = [px, py];
        polygonNew(i-1,:) = p;
        preLine = now;
    end
end
end
