# Supplementary material for: Simulation Study on Coverage Path Planning of Autonomous Tasks in Hilly Farmland Based on Energy Consumption Model
Source: Hindawi journal article supplement (doi:10.1155/2020/4535734), 2020-08-30
Supplement: f1 [file 4535734.f1.zip › 4535734.f1/Algorithm-pathplanning-matlab/crossp.m]

function t = crossp(p, cr, line)
ca = p(1);
cb = p(2);
la = line(1);
lb = line(2);
lc = line(3);
if(la==0)
    t1=0-lc/lb-cb;
    t1=pow(t1,2)-pow(cr,2);
    t1=pow(ca,2)+t1;
    t1=4*pow(ca,2)-4*t1;
    t = t1;
elseif(lb==0)
    t1=0-lc/la-ca;
    t1=pow(t1,2)-pow(cr,2);
    t1=pow(cb,2)+t1;
    t1=4*pow(cb,2)-4*t1;
    t = t1;
else
    t1=0-lc/lb;
    t2=0-la/lb;
    c=pow(t1,2)+pow(ca,2)+pow(cb,2)-2*t1*cb-pow(cr,2);
    b=0-2*(ca-t1*t2+t2*cb);
    a=1+pow(t2,2);
    t=pow(b,2)-4*a*c;
end
end
