# Supplementary material for: Simulation Study on Coverage Path Planning of Autonomous Tasks in Hilly Farmland Based on Energy Consumption Model
Source: Hindawi journal article supplement (doi:10.1155/2020/4535734), 2020-08-30
Supplement: f1 [file 4535734.f1.zip › 4535734.f1/Algorithm-pathplanning-matlab/Curve.m]

classdef Curve
    %CURVE ´Ë´¦ÏÔÊ¾ÓÐ¹Ø´ËÀàµÄÕªÒª
    %   ´Ë´¦ÏÔÊ¾ÏêÏ¸ËµÃ÷
    
    properties
    end
    
    methods
    end
    
end
