# Supplementary material for: Simulation Study on Coverage Path Planning of Autonomous Tasks in Hilly Farmland Based on Energy Consumption Model
Source: Hindawi journal article supplement (doi:10.1155/2020/4535734), 2020-08-30
Supplement: f1 [file 4535734.f1.zip › 4535734.f1/Algorithm-pathplanning-matlab/demo_corrosion.m]

clc
clear
close all


obj  = [4.5,4;
    5,3.5;
    5.5,2;
    4.2,2.5;
    4.7,2.8];
obj = getPoly(obj);
line(obj(:,1), obj(:,2));
hold on
obj2 = corrosion(obj, 0.1);
obj2 = getPoly(obj2);
plot(obj2(:,1), obj2(:,2), 'r')
axis equal
