# Supplementary material for: Simulation Study on Coverage Path Planning of Autonomous Tasks in Hilly Farmland Based on Energy Consumption Model
Source: Hindawi journal article supplement (doi:10.1155/2020/4535734), 2020-08-30
Supplement: f1 [file 4535734.f1.zip › 4535734.f1/Algorithm-pathplanning-matlab/demo_plotline.m]

clc
clear
close all
line = Line2D([{[1,1;2,2]}, {[3,4;4,3]}]);
line.graphPlot(1)
