# Supplementary material for: Simulation Study on Coverage Path Planning of Autonomous Tasks in Hilly Farmland Based on Energy Consumption Model
Source: Hindawi journal article supplement (doi:10.1155/2020/4535734), 2020-08-30
Supplement: f1 [file 4535734.f1.zip › 4535734.f1/Algorithm-pathplanning-matlab/dfs.m]

function ylist = dfs(start, graph, callback)
% start Æðµã
% graph ÈýÔª×é±íÊ¾µÄÍ¼
% callback »Øµ÷º¯Êý£¬¶Ô±éÀú×ö²Ù×÷
stack = start;
closeSet = [];
now_path = [];
nodes = unique([graph(:,1)', graph(:,2)']);
len_nodes = length(nodes);
ylist = [];
while ~isempty(stack)
    thisNode = stack(end);
    stack(end) = [];
    next = graph(graph(:,1)==thisNode, 2);
    next = setdiff(next, closeSet);
    if ~isempty(next)
        stack = [stack,next];
        closeSet = [closeSet, thisNode]; % clsoe±í¼ÇÂ¼ÒÑ¾­·ÃÎÊ¹ý
        % now_path = [now_path, thisNode]; % ·ÃÎÊµÄ½ÚµãÌí¼Óµ½Â·¾¶ÖÐ
        
    else
        if length(closeSet) == len_nodes
            ylist = [ylist, callback(closeSet)];
        end
        thisNode = stack(end);
        stack(end) = [];
        closeSet(end) = [];
    end
end

end
