# Supplementary material for: Simulation Study on Coverage Path Planning of Autonomous Tasks in Hilly Farmland Based on Energy Consumption Model
Source: Hindawi journal article supplement (doi:10.1155/2020/4535734), 2020-08-30
Supplement: f1 [file 4535734.f1.zip › 4535734.f1/Algorithm-pathplanning-matlab/functional/apply.m]

function apply(array, func)
% APPLY(ARRAY, FUNC)
%   Apply FUNC to every element of ARRAY.
%
%   Example:
%     apply(1:10, @disp) % Display every element of the array.
%

  if iscell(array)
    for i = 1:numel(array)
      func(array{i});
    end
  else
    for i = 1:numel(array)
      func(array(i));
    end
  end
end
