# Supplementary material for: Simulation Study on Coverage Path Planning of Autonomous Tasks in Hilly Farmland Based on Energy Consumption Model
Source: Hindawi journal article supplement (doi:10.1155/2020/4535734), 2020-08-30
Supplement: f1 [file 4535734.f1.zip › 4535734.f1/Algorithm-pathplanning-matlab/functional/comp.m]

function f = comp(varargin)
% FUNC = COMP(FUNCTIONS+)
%   Form the composition of FUNCTIONS, resulting in FUNC.
%

  functions = varargin;
  function varargout = func(varargin)
    in = varargin;
    for i = 1:numel(functions)
      func = functions{i};
      if iscell(func)
        [func, nout] = deal(func{:});
      else
        nout = max(nargout(func), 1);
      end
      out = cell(1, nout);
      [out{:}] = func(in{:});
      in = out;
    end

    [varargout{1:max(nargout, 1)}] = deal(in{:});
  end

  f = @func;
end
