# Supplementary material for: Simulation Study on Coverage Path Planning of Autonomous Tasks in Hilly Farmland Based on Energy Consumption Model
Source: Hindawi journal article supplement (doi:10.1155/2020/4535734), 2020-08-30
Supplement: f1 [file 4535734.f1.zip › 4535734.f1/Algorithm-pathplanning-matlab/functional/id.m]

function varargout = id(varargin)
% OUTPUT = ID(INPUT)
% [OUTPUT, ...] = ID(INPUT, ...)
%   Identity function.  Output is same as input.
%
  [varargout{1:max(nargout, 1)}] = deal(varargin{:});
end
