# Supplementary material for: Simulation Study on Coverage Path Planning of Autonomous Tasks in Hilly Farmland Based on Energy Consumption Model
Source: Hindawi journal article supplement (doi:10.1155/2020/4535734), 2020-08-30
Supplement: f1 [file 4535734.f1.zip › 4535734.f1/Algorithm-pathplanning-matlab/functional/indexAt.m]

function f = indexAt(arrays)
% FUNC = INDEXAT(ARRAYS)
%   Take a cell of arrays, and return a function that can ordinally index
%   into that array.  IE, we return FUNC such that
%     FUNC(i, idx)
%   gets the i'th element of the idx'th array.
%

  function v = indexFunc(i, idx)
    arr = arrays{idx};
    if iscell(arr)
      v = arr{i};
    else
      v = arr(i);
    end
  end

  f = @indexFunc;
end
