# Supplementary material for: Simulation Study on Coverage Path Planning of Autonomous Tasks in Hilly Farmland Based on Energy Consumption Model
Source: Hindawi journal article supplement (doi:10.1155/2020/4535734), 2020-08-30
Supplement: f1 [file 4535734.f1.zip › 4535734.f1/Algorithm-pathplanning-matlab/functional/indexInto.m]

function v = indexInto(arr, idx)
% VAL = INDEXBY(ARRAY, INDEX)
%   Get the INDEX'th of ARRAY regardless of if it is a cell or not.
%

  if iscell(arr)
    v = arr{idx};
  else
    v = arr(idx);
  end
end
