# Supplementary material for: Simulation Study on Coverage Path Planning of Autonomous Tasks in Hilly Farmland Based on Energy Consumption Model
Source: Hindawi journal article supplement (doi:10.1155/2020/4535734), 2020-08-30
Supplement: f1 [file 4535734.f1.zip › 4535734.f1/Algorithm-pathplanning-matlab/functional/islambda.m]

function b = islambda(a)
% BOOL = ISLAMBDA(VALUE)
%   Returns true when VALUE is a function handle, either an explicit lambda
%   expression or a named function.
%

  b = strcmp(class(a), 'function_handle');
end
