# Supplementary material for: Simulation Study on Coverage Path Planning of Autonomous Tasks in Hilly Farmland Based on Energy Consumption Model
Source: Hindawi journal article supplement (doi:10.1155/2020/4535734), 2020-08-30
Supplement: f1 [file 4535734.f1.zip › 4535734.f1/Algorithm-pathplanning-matlab/functional/konst.m]

function func = konst(value)
% FUNC = KONST(VALUE)
%   Return a function that always returns VALUE.
%

  function ret = konstFunc(varargin)
    ret = value;
  end
  func = @konstFunc;
end
