# Supplementary material for: Simulation Study on Coverage Path Planning of Autonomous Tasks in Hilly Farmland Based on Energy Consumption Model
Source: Hindawi journal article supplement (doi:10.1155/2020/4535734), 2020-08-30
Supplement: f1 [file 4535734.f1.zip › 4535734.f1/Algorithm-pathplanning-matlab/functional/negate.m]

function func = negate(inFunc)
% NFUNC = NEGATE(FUNC)
%   Return the NOT composition of a function - ie, if such a function
%   returns a true value, this would return false, and vice versa.
%
  func = @(i) ~inFunc(i);
end
