# Supplementary material for: Simulation Study on Coverage Path Planning of Autonomous Tasks in Hilly Farmland Based on Energy Consumption Model
Source: Hindawi journal article supplement (doi:10.1155/2020/4535734), 2020-08-30
Supplement: f1 [file 4535734.f1.zip › 4535734.f1/Algorithm-pathplanning-matlab/getABC.m]

function [a,b,c] = getABC(p1,p2)
% Í¨¹ýÁ½µãÈ·¶¨Ö±ÏßµÄ±ê×¼·½³Ìa*x+b*y+c=0
% p1£¬p2 1*2 double ±íÊ¾µã
% Èô·µ»ØÖµÊÇ¾ØÕó£¬ÄÇÃ´¾ØÕóÎª1*3 double,±íÊ¾a,b,cÈý¸öÖµ
% Èô·µ»ØÖµÊÇÈý¸öÊý£¬Æä·Ö±ð±íÊ¾a,b,cÈý¸öÖµ
% Author A.Star
% e-mail : chenxiaolong12315@163.com
% 2017-5-30

    a = p2(2) - p1(2);
    b = p1(1) - p2(1);
    c = -a * p1(1) - b * p1(2);
    if nargout == 1
        a = [a,b,c];
        return
    end
end
