# Supplementary material for: Simulation Study on Coverage Path Planning of Autonomous Tasks in Hilly Farmland Based on Energy Consumption Model
Source: Hindawi journal article supplement (doi:10.1155/2020/4535734), 2020-08-30
Supplement: f1 [file 4535734.f1.zip › 4535734.f1/Algorithm-pathplanning-matlab/getCoordinate.m]

function coordinateList = getCoordinate(line, polygon)
polygon = getPoly(polygon);
[m, ~] = size(polygon);
pre = polygon(1,:);
coordinateList = [];
values = [];
a = line(1);
b = line(2);
for i = 2:m
	now = polygon(i,:);
    if isCross(pre, now, line)
        line_edge = getABC(pre, now);
        [coor_x, coor_y] = jiaodian(line, line_edge);
        temp = coor_x * a + coor_y * b;
        indValues = sum(values < temp);
        coordinateList = [coordinateList(1:indValues,:); coor_x, coor_y; coordinateList(indValues+1:end,:)];
        values = [values(1:indValues), temp, values(indValues+1:end)];
    end
    pre = now;
end
if ~isempty(coordinateList)
[~,I] = sort(coordinateList(:,1));
coordinateList = coordinateList(I, :);
end
end
