# Supplementary material for: Simulation Study on Coverage Path Planning of Autonomous Tasks in Hilly Farmland Based on Energy Consumption Model
Source: Hindawi journal article supplement (doi:10.1155/2020/4535734), 2020-08-30
Supplement: f1 [file 4535734.f1.zip › 4535734.f1/Algorithm-pathplanning-matlab/getPoly.m]

function points = getPoly(points)
% ·µ»Ø¶à±ßÐÎµÄ±ê×¼ÐÎÊ½
% ¼´points(1,:)ÐèÒªÓëpoints(end,:)ÏàÍ¬
% Author A.Star
% e-mail : chenxiaolong12315@163.com
% 2017-5-30
if sum(points(1,:) == points(end,:)) ~= 2%Èç¹ûÁ½µãÏàµÈ£¬·µ»Ø£¨1,1£©
    points = [points;points(1,:)];
end
end
