# Supplementary material for: Simulation Study on Coverage Path Planning of Autonomous Tasks in Hilly Farmland Based on Energy Consumption Model
Source: Hindawi journal article supplement (doi:10.1155/2020/4535734), 2020-08-30
Supplement: f1 [file 4535734.f1.zip › 4535734.f1/Algorithm-pathplanning-matlab/getTuring.m]

function turing = getTuring(w, r, theta, omega)
% w :µØÍ·¿í¶È
% r £º×îÐ¡×ªÍä°ë¾¶
% theta £ºÐÐµÀÓëµØÍ·±ß½ç£¨ÄÚ²¿Êµ¼Ê×÷ÒµÇø±ß½ç£©¼äµÄ½Ç¶È
% omega £ºÐÐµÀ¿í¶È£¨¹¤×÷·ù¿í£©

if w >= r * (1+cos(theta)) + omega * (1+sin(theta)*cos(theta)) / 2;
    r_mul_2 = r * 2;
    if r_mul_2 > omega
        % 
        if r * (1+cos(theta))< (w - (omega/2))
            if r > omega/2*sin(theta)
                turing = FishtailTuring();
            else
                turing = HookTuring();
            end
        else
            if r > omega/2*sin(theta)
                turing = BultTuring();
            else
                turing = {BultTuring(), HookTuring()};
            end
        end
    elseif r_mul_2 < omega
        % Æ½ÐÍ×ªÍä
        turing = FlatTuring;
    else
        % UÐÎ×ªÍä
        turing = UTuring();
    end
        
else
    % TODO: 
    % ÓãÎ²×ªÍä
    turing = FishtailTuring();

end
