# Supplementary material for: Simulation Study on Coverage Path Planning of Autonomous Tasks in Hilly Farmland Based on Energy Consumption Model
Source: Hindawi journal article supplement (doi:10.1155/2020/4535734), 2020-08-30
Supplement: f1 [file 4535734.f1.zip › 4535734.f1/Algorithm-pathplanning-matlab/importEdge.m]

function [VarName1,VarName2] = importEdge(filename, startRow, endRow)
%IMPORTFILE1 ½«ÎÄ±¾ÎÄ¼þÖÐµÄÊýÖµÊý¾Ý×÷ÎªÁÐÊ¸Á¿µ¼Èë¡£
%   [VARNAME1,VARNAME2] = IMPORTFILE1(FILENAME) ¶ÁÈ¡ÎÄ±¾ÎÄ¼þ FILENAME ÖÐÄ¬ÈÏÑ¡¶¨·¶Î§µÄÊý¾Ý¡£
%
%   [VARNAME1,VARNAME2] = IMPORTFILE1(FILENAME, STARTROW, ENDROW) ¶ÁÈ¡ÎÄ±¾ÎÄ¼þ
%   FILENAME µÄ STARTROW ÐÐµ½ ENDROW ÐÐÖÐµÄÊý¾Ý¡£
%
% Example:
%   [VarName1,VarName2] = importfile1('0101.csv',2, 32);
%
%    ÁíÇë²ÎÔÄ TEXTSCAN¡£

% ÓÉ MATLAB ×Ô¶¯Éú³ÉÓÚ 2019/11/18 18:25:49

%% ³õÊ¼»¯±äÁ¿¡£
delimiter = ',';
if nargin<=2
    startRow = 2;
    endRow = inf;
end

%% Ã¿¸öÎÄ±¾ÐÐµÄ¸ñÊ½×Ö·û´®:
%   ÁÐ1: Ë«¾«¶ÈÖµ (%f)
%	ÁÐ2: Ë«¾«¶ÈÖµ (%f)
% ÓÐ¹ØÏêÏ¸ÐÅÏ¢£¬Çë²ÎÔÄ TEXTSCAN ÎÄµµ¡£
formatSpec = '%f%f%[^\n\r]';

%% ´ò¿ªÎÄ±¾ÎÄ¼þ¡£
fileID = fopen(filename,'r');

%% ¸ù¾Ý¸ñÊ½×Ö·û´®¶ÁÈ¡Êý¾ÝÁÐ¡£
% ¸Ãµ÷ÓÃ»ùÓÚÉú³É´Ë´úÂëËùÓÃµÄÎÄ¼þµÄ½á¹¹¡£Èç¹ûÆäËûÎÄ¼þ³öÏÖ´íÎó£¬Çë³¢ÊÔÍ¨¹ýµ¼Èë¹¤¾ßÖØÐÂÉú³É´úÂë¡£
dataArray = textscan(fileID, formatSpec, endRow(1)-startRow(1)+1, 'Delimiter', delimiter, 'HeaderLines', startRow(1)-1, 'ReturnOnError', false);
for block=2:length(startRow)
    frewind(fileID);
    dataArrayBlock = textscan(fileID, formatSpec, endRow(block)-startRow(block)+1, 'Delimiter', delimiter, 'HeaderLines', startRow(block)-1, 'ReturnOnError', false);
    for col=1:length(dataArray)
        dataArray{col} = [dataArray{col};dataArrayBlock{col}];
    end
end

%% ¹Ø±ÕÎÄ±¾ÎÄ¼þ¡£
fclose(fileID);

%% ¶ÔÎÞ·¨µ¼ÈëµÄÊý¾Ý½øÐÐµÄºó´¦Àí¡£
% ÔÚµ¼Èë¹ý³ÌÖÐÎ´Ó¦ÓÃÎÞ·¨µ¼ÈëµÄÊý¾ÝµÄ¹æÔò£¬Òò´Ë²»°üÀ¨ºó´¦Àí´úÂë¡£ÒªÉú³ÉÊÊÓÃÓÚÎÞ·¨µ¼ÈëµÄÊý¾ÝµÄ´úÂë£¬ÇëÔÚÎÄ¼þÖÐÑ¡ÔñÎÞ·¨µ¼ÈëµÄÔª°û£¬È»ºóÖØÐÂÉú³É½Å±¾¡£

%% ½«µ¼ÈëµÄÊý×é·ÖÅä¸øÁÐ±äÁ¿Ãû³Æ
VarName1 = dataArray{:, 1};
VarName2 = dataArray{:, 2};
