# Supplementary material for: Simulation Study on Coverage Path Planning of Autonomous Tasks in Hilly Farmland Based on Energy Consumption Model
Source: Hindawi journal article supplement (doi:10.1155/2020/4535734), 2020-08-30
Supplement: f1 [file 4535734.f1.zip › 4535734.f1/Algorithm-pathplanning-matlab/importfile.m]

function [VarName1,VarName2,VarName3] = importfile(filename, startRow, endRow)
%IMPORTFILE1 ½«ÎÄ±¾ÎÄ¼þÖÐµÄÊýÖµÊý¾Ý×÷ÎªÁÐÊ¸Á¿µ¼Èë¡£
%   [VARNAME1,VARNAME2,VARNAME3] = IMPORTFILE1(FILENAME) ¶ÁÈ¡ÎÄ±¾ÎÄ¼þ FILENAME
%   ÖÐÄ¬ÈÏÑ¡¶¨·¶Î§µÄÊý¾Ý¡£
%
%   [VARNAME1,VARNAME2,VARNAME3] = IMPORTFILE1(FILENAME, STARTROW, ENDROW)
%   ¶ÁÈ¡ÎÄ±¾ÎÄ¼þ FILENAME µÄ STARTROW ÐÐµ½ ENDROW ÐÐÖÐµÄÊý¾Ý¡£
%
% Example:
%   [VarName1,VarName2,VarName3] = importfile1('tk1(1).xyz',1, 1184);
%
%    ÁíÇë²ÎÔÄ TEXTSCAN¡£

% ÓÉ MATLAB ×Ô¶¯Éú³ÉÓÚ 2019/10/17 15:43:43

%% ³õÊ¼»¯±äÁ¿¡£
delimiter = ',';
if nargin<=2
    startRow = 1;
    endRow = inf;
end

%% ½«Êý¾ÝÁÐ×÷Îª×Ö·û´®¶ÁÈ¡:
% ÓÐ¹ØÏêÏ¸ÐÅÏ¢£¬Çë²ÎÔÄ TEXTSCAN ÎÄµµ¡£
formatSpec = '%s%s%s%[^\n\r]';

%% ´ò¿ªÎÄ±¾ÎÄ¼þ¡£
fileID = fopen(filename,'r');

%% ¸ù¾Ý¸ñÊ½×Ö·û´®¶ÁÈ¡Êý¾ÝÁÐ¡£
% ¸Ãµ÷ÓÃ»ùÓÚÉú³É´Ë´úÂëËùÓÃµÄÎÄ¼þµÄ½á¹¹¡£Èç¹ûÆäËûÎÄ¼þ³öÏÖ´íÎó£¬Çë³¢ÊÔÍ¨¹ýµ¼Èë¹¤¾ßÖØÐÂÉú³É´úÂë¡£
dataArray = textscan(fileID, formatSpec, endRow(1)-startRow(1)+1, 'Delimiter', delimiter, 'HeaderLines', startRow(1)-1, 'ReturnOnError', false);
for block=2:length(startRow)
    frewind(fileID);
    dataArrayBlock = textscan(fileID, formatSpec, endRow(block)-startRow(block)+1, 'Delimiter', delimiter, 'HeaderLines', startRow(block)-1, 'ReturnOnError', false);
    for col=1:length(dataArray)
        dataArray{col} = [dataArray{col};dataArrayBlock{col}];
    end
end

%% ¹Ø±ÕÎÄ±¾ÎÄ¼þ¡£
fclose(fileID);

%% ½«°üº¬ÊýÖµ×Ö·û´®µÄÁÐÄÚÈÝ×ª»»ÎªÊýÖµ¡£
% ½«·ÇÊýÖµ×Ö·û´®Ìæ»»Îª NaN¡£
raw = repmat({''},length(dataArray{1}),length(dataArray)-1);
for col=1:length(dataArray)-1
    raw(1:length(dataArray{col}),col) = dataArray{col};
end
numericData = NaN(size(dataArray{1},1),size(dataArray,2));

for col=[1,2,3]
    % ½«ÊäÈëÔª°ûÊý×éÖÐµÄ×Ö·û´®×ª»»ÎªÊýÖµ¡£ÒÑ½«·ÇÊýÖµ×Ö·û´®Ìæ»»Îª NaN¡£
    rawData = dataArray{col};
    for row=1:size(rawData, 1);
        % ´´½¨ÕýÔò±í´ïÊ½ÒÔ¼ì²â²¢É¾³ý·ÇÊýÖµÇ°×ººÍºó×º¡£
        regexstr = '(?<prefix>.*?)(?<numbers>([-]*(\d+[\,]*)+[\.]{0,1}\d*[eEdD]{0,1}[-+]*\d*[i]{0,1})|([-]*(\d+[\,]*)*[\.]{1,1}\d+[eEdD]{0,1}[-+]*\d*[i]{0,1}))(?<suffix>.*)';
        try
            result = regexp(rawData{row}, regexstr, 'names');
            numbers = result.numbers;
            
            % ÔÚ·ÇÇ§Î»Î»ÖÃÖÐ¼ì²âµ½¶ººÅ¡£
            invalidThousandsSeparator = false;
            if any(numbers==',');
                thousandsRegExp = '^\d+?(\,\d{3})*\.{0,1}\d*$';
                if isempty(regexp(thousandsRegExp, ',', 'once'));
                    numbers = NaN;
                    invalidThousandsSeparator = true;
                end
            end
            % ½«ÊýÖµ×Ö·û´®×ª»»ÎªÊýÖµ¡£
            if ~invalidThousandsSeparator;
                numbers = textscan(strrep(numbers, ',', ''), '%f');
                numericData(row, col) = numbers{1};
                raw{row, col} = numbers{1};
            end
        catch me
        end
    end
end


%% ½«µ¼ÈëµÄÊý×é·ÖÅä¸øÁÐ±äÁ¿Ãû³Æ
VarName1 = cell2mat(raw(:, 1));
VarName2 = cell2mat(raw(:, 2));
VarName3 = cell2mat(raw(:, 3));
