# Supplementary material for: Simulation Study on Coverage Path Planning of Autonomous Tasks in Hilly Farmland Based on Energy Consumption Model
Source: Hindawi journal article supplement (doi:10.1155/2020/4535734), 2020-08-30
Supplement: f1 [file 4535734.f1.zip › 4535734.f1/Algorithm-pathplanning-matlab/inPoly.m]

function flags = inPoly(p,poly)
% ÅÐ¶ÏµãÊÇ·ñÔÚ¶à±ßÐÎÄÚ
% flag(i)ÎªÆæÊý£¬ÄÇÃ´ÔÚ£¬Å¼ÊýÎª²»ÔÚ
% p : pn*2 ¾ØÕó
% poly £ºpolyn*2 ¾ØÕó£¬×¢Òâ£¬ÆðµãºÍÖÕµãÐèÒªÏàÍ¬
% See also lineInPoly
% ÖÂÐ»²©¿Í http://www.cnblogs.com/dwdxdy/p/3230647.html
% Author A.Star
% e-mail : chenxiaolong12315@163.com
% 2017-5-30

if ~(poly(1,1) == poly(end,1)&&poly(1,2) == poly(end,2))
    poly = [poly;poly(1,:)];
end

pn = size(p,1);
polyn = size(poly,1);
flags = zeros(1,pn);
for i=1:pn

    if ~isempty(find(poly(:,1)==p(i,1)& poly(:,2)==p(i,2)))%ÕÒµ½Ò»¸öÏàÍ¬µÄµã¼´¿É
        flags(i) = 1;
        continue;%%½áÊøpn=1£¬½øÈëpn=2
    end
    for j=2:polyn
        if ((((poly(j,2)<=p(i,2)) && (p(i,2) < poly(j-1,2) )) ||...
                ((poly(j-1,2) <= p(i,2)) && (p(i,2) < poly(j,2)))) && ...
                (p(i,1) < (poly(j-1,1) - poly(j,1)) * (p(i,2) - poly(j,2))/(poly(j-1,2)-poly(j,2)) + poly(j,1)))
            flags(i) = flags(i) + 1;
        end
    end
end
flags = mod(flags,2);
end
