# Supplementary material for: Simulation Study on Coverage Path Planning of Autonomous Tasks in Hilly Farmland Based on Energy Consumption Model
Source: Hindawi journal article supplement (doi:10.1155/2020/4535734), 2020-08-30
Supplement: f1 [file 4535734.f1.zip › 4535734.f1/Algorithm-pathplanning-matlab/isCross.m]

function flag = isCross(p1, p2, line)
% p1: Ïß¶ÎÆðµã
% p2: Ïß¶ÎÖÕµã
% line: Ö±Ïß±ê×¼·½³Ì

a = line(1);
b = line(2);
c = line(3);

f1 = p1(1) * a + p1(2) * b + c; 
f2 = p2(1) * a + p2(2) * b + c; 
flag = (f1 * f2 <= 0);

end
