# Supplementary material for: Simulation Study on Coverage Path Planning of Autonomous Tasks in Hilly Farmland Based on Energy Consumption Model
Source: Hindawi journal article supplement (doi:10.1155/2020/4535734), 2020-08-30
Supplement: f1 [file 4535734.f1.zip › 4535734.f1/Algorithm-pathplanning-matlab/jiaodian.m]

function [x,y] = jiaodian(line1,line2)
% ÇóÁ½Ö±Ïßline1Óëline2µÄ½»µã
% ÆäÖÐline1,line2ÎªÖ±ÏßµÄ±ê×¼ÐÎÊ½ax+by+c=0
% x,yÎªnan£¬´ú±íÏß¶ÎÆ½ÐÐ
% Èç¹ûÎªÆäËû£¬ÄÇÃ´x,y±íÊ¾½»µã×ø±ê
% Author A.Star
% e-mail : chenxiaolong12315@163.com
% 2017-5-30

a1 = line1(1);
b1 = line1(2);
c1 = line1(3);
a2 = line2(1);
b2 = line2(2);
c2 = line2(3);
if a2*b1-a1*b2 == 0
    x = nan;
    y = nan;
    return
end
y = (a1*c2-c1*a2)/(a2*b1-a1*b2);
x = -(b1*c2-c1*b2)/(a2*b1-a1*b2);
end
