# Supplementary material for: Simulation Study on Coverage Path Planning of Autonomous Tasks in Hilly Farmland Based on Energy Consumption Model
Source: Hindawi journal article supplement (doi:10.1155/2020/4535734), 2020-08-30
Supplement: f1 [file 4535734.f1.zip › 4535734.f1/Algorithm-pathplanning-matlab/jiaodianSegmentArc.m]

function p = jiaodianSegmentArc(segment, p, cr)
% Ïß¶ÎºÍ»¡Çó½»µã
[la, lb, lc]=getABC(segment(1,:), segment(2,:));
ca = p(1);
cb = p(2);
t=crossp(ca,cb,cr,la,lb,lc);
if(t<0)
    p = empty(1,2);
elseif(t==0)
    if(la==0)
        x1=0-ca;
        y1=0-lc/lb;
        p = [x1, y1];
    elseif(lb==0)
        x1=0-lc/la;
        y1=0-cb;
        p = [x1,y1];
    else
        x1=(la*cb/lb+la*lc/pow(lb,2)-ca)/(1+pow(la,2)/pow(lb,2));
        y1=0-(lc+la*x1)/lb;
        p = [x1, y1];
    end
else
    t=sqrt(t);
    if(la==0)
        x1=ca+t;
        y1=0-lc/lb;
        x2=ca-t;
        y2=y1;
        p = [x1, y1;x2, y2];
    elseif(lb==0)
        x1=0-lc/la;
        x2 = x1;
        y1=cb+t;
        y2=cb-t;
        p = [x1, y1;x2, y2];
    else
        x1=(ca-(la*cb/lb+la*lc/pow(lb,2))+t)/(1+pow(la,2)/pow(lb,2));
        y1=0-(lc+la*x1)/lb;
        x2=(ca-(la*cb/lb+la*lc/pow(lb,2))-t)/(1+pow(la,2)/pow(lb,2));
        y2=0-(lc+la*x2)/lb;
        p = [x1, y1;x2, y2];  
    end
end
end
