# Supplementary material for: Simulation Study on Coverage Path Planning of Autonomous Tasks in Hilly Farmland Based on Energy Consumption Model
Source: Hindawi journal article supplement (doi:10.1155/2020/4535734), 2020-08-30
Supplement: f1 [file 4535734.f1.zip › 4535734.f1/Algorithm-pathplanning-matlab/main_func.m]

clc
clear
close all

pathdir = '.\2020.02.11Êý¾Ý';

for i = 1:5
    path1 = [pathdir, '/0',num2str(i),'0',num2str(i),'/0',num2str(i),'0',num2str(i),'¸ß³Ìµã.csv']
    path2 = [pathdir, '/0',num2str(i),'0',num2str(i),'/0',num2str(i),'0',num2str(i),'±ß½çµã.csv']
    [x,y,z] = importMap(path1);
    [edge_x,edge_y] = importEdge(path2);
    main_plot(x,y,z,edge_x,edge_y, 1, 1);
end
