# Supplementary material for: Simulation Study on Coverage Path Planning of Autonomous Tasks in Hilly Farmland Based on Energy Consumption Model
Source: Hindawi journal article supplement (doi:10.1155/2020/4535734), 2020-08-30
Supplement: f1 [file 4535734.f1.zip › 4535734.f1/Algorithm-pathplanning-matlab/main_plot.m]

function [path, len] = main_plot(x,y,z,edge_x,edge_y, figureNumber, theta)

% [x,y,z] = importMap('D:\astar\codes\matlab\astar-pathplanning-matlab\µÚ¶þ´ÎÌá¹©µÄÊý¾Ý\0101\0101¸ß³Ìµã.csv');
% [edge_x,edge_y] = importEdge('D:\astar\codes\matlab\astar-pathplanning-matlab\µÚ¶þ´ÎÌá¹©µÄÊý¾Ý\0101\0101.csv');
% theta = Ö±ÏßÏßÂ·µÄÇãÐ±½Ç¶È
% figureNumber = 1; ÌØÊâº¬Òå: µ±figure numberÎª0Ê±£¬²»»æÍ¼
import config.GlobalConfig;
import turn.FishtailTurn;

if figureNumber ~= 0
    figure(figureNumber)
end

edge_2d_1 = [edge_x,edge_y];
plot(edge_x, edge_y, 'k');
hold on
edge_2d = corrosion(edge_2d_1, GlobalConfig.omega, GlobalConfig.r, theta);
edge_2d = getPoly(edge_2d);
plot(edge_2d(:,1), edge_2d(:,2), 'c');
map_2d = [x, y];

polygon_edge = Polygon(edge_2d);

if figureNumber ~= 0
    polygon_edge.graphPlot(figureNumber);
end

turning = FishtailTurn(theta, GlobalConfig.omega, GlobalConfig.r);
[path, len] = solvePath([x, y, z], edge_2d, theta, turning, GlobalConfig.omega, figureNumber);
if figureNumber ~= 0
    for each = path
        each{1}.graphPlot(figureNumber);
    end
end
axis equal
