# Supplementary material for: Simulation Study on Coverage Path Planning of Autonomous Tasks in Hilly Farmland Based on Energy Consumption Model
Source: Hindawi journal article supplement (doi:10.1155/2020/4535734), 2020-08-30
Supplement: f1 [file 4535734.f1.zip › 4535734.f1/Algorithm-pathplanning-matlab/MutiLine2D.m]

classdef MutiLine2D < Graph
    properties
    end   
    methods
        function obj = MutiLine2D(data)
            obj = obj@Graph(data);
        end
        function graphPlot(obj, figureNumber)
            if figureNumber ~= 0
                figure(figureNumber)
            end
            hold on
            for each_line = obj.data
                plot(each_line{1}(:,1), each_line{1}(:,2), 'r');  
            end
        end
        function length(obj)
            for each_line = obj.data
                each_line{1}
            end
        end
    end
end
