# Supplementary material for: Simulation Study on Coverage Path Planning of Autonomous Tasks in Hilly Farmland Based on Energy Consumption Model
Source: Hindawi journal article supplement (doi:10.1155/2020/4535734), 2020-08-30
Supplement: f1 [file 4535734.f1.zip › 4535734.f1/Algorithm-pathplanning-matlab/onsegment.m]

function flag = onsegment(seg, Q)
% ÅÐ¶ÏQÊÇ·ñÔÚÏß¶ÎsegÖÐ
pi = seg(1,:);
pj = seg(end,:);  % endµÄº¬Òå£ºÖ®Ç°ÊÇ2£¬ºóÃæ·¢ÏÖÓÐ¶à¶ÎÏß¶ÎµÄÇé¿ö£¬ËùÒÔÊÇend
v1 = pi-Q;
v2 = pj-Q;
eps = 1e-10;
flag = abs(det([v1; v2])) < eps && v1(1) * v2(1) <=0;
end
