# Supplementary material for: Simulation Study on Coverage Path Planning of Autonomous Tasks in Hilly Farmland Based on Energy Consumption Model
Source: Hindawi journal article supplement (doi:10.1155/2020/4535734), 2020-08-30
Supplement: f1 [file 4535734.f1.zip › 4535734.f1/Algorithm-pathplanning-matlab/Path.m]

classdef Path
    properties
       data;
    end
    methods
        function obj = Graph(data)
            obj.data = data;
        end
        function graphPlot(~, ~)
            return
        end
        function len_sum = length_3d(obj, graph, step)
            len_sum = 0;
            for each = obj.data
                len_sum = len_sum + each.length_3d(graph, step);
            end
        end
        function len_sum = length(obj)
            len_sum = 0;
            for each = obj.data
                len_sum = len_sum + each.length();
            end
        end
    end
end
