# Supplementary material for: Simulation Study on Coverage Path Planning of Autonomous Tasks in Hilly Farmland Based on Energy Consumption Model
Source: Hindawi journal article supplement (doi:10.1155/2020/4535734), 2020-08-30
Supplement: f1 [file 4535734.f1.zip › 4535734.f1/Algorithm-pathplanning-matlab/plotMap.m]

function plotMap(map)
x = map(:, 1);
y = map(:, 2);
z = map(:, 3);
length_x = length(x);
xi = unique(x);
yi = unique(y);
size_x = length(xi);
size_y = length(yi);

ind_x = zeros(1, length_x);
ind_y = zeros(1, length_x);
ZI = -ones(size_x, size_y);
i = 1;
for xx = xi'
    ind_x(x == xx) = i;
    i = i + 1;
end

i = 1;
for yy = yi'
    ind_y(y == yy) = i;
    i = i + 1;
end

ZI(sub2ind([size_x, size_y],ind_x, ind_y)) = z;
[YI, XI] = meshgrid(yi, xi);
mesh(XI, YI, ZI)
hold on
[C,h] = contour(XI,YI,ZI, 10);

set(h,'ShowText','on','TextStep',get(h,'LevelStep')*2)
colormap cool

end
