# Supplementary material for: Simulation Study on Coverage Path Planning of Autonomous Tasks in Hilly Farmland Based on Energy Consumption Model
Source: Hindawi journal article supplement (doi:10.1155/2020/4535734), 2020-08-30
Supplement: f1 [file 4535734.f1.zip › 4535734.f1/Algorithm-pathplanning-matlab/plotPath.m]

function plotPath(map, edge, path, figureNumber)
% »æÖÆµØÍ¼
% map xyz Í¼ m x 3 matrix
% edge ±ß½çµã n x 2 matrix
% path 1 x k struct ±íÊ¾Â·¾¶
%      struct.type ±íÊ¾Í¼ÐÎÖÖÀà
%      struct.data ±íÊ¾Êý¾ÝËùÐèµÄ²ÎÊý±í
figure(figureNumber)
for c = path
    c.plot();
end

end
