# Supplementary material for: Simulation Study on Coverage Path Planning of Autonomous Tasks in Hilly Farmland Based on Energy Consumption Model
Source: Hindawi journal article supplement (doi:10.1155/2020/4535734), 2020-08-30
Supplement: f1 [file 4535734.f1.zip › 4535734.f1/Algorithm-pathplanning-matlab/Polygon.m]

classdef Polygon < Graph
%     ¶à±ßÐÎ
    properties
        
    end   
    methods
        function obj = Polygon(data)
            data = getPoly(data);
            obj = obj@Graph(data);
        end
        function graphPlot(obj, figureNumber)
            figure(figureNumber)
            hold on
            plot(obj.data(:,1), obj.data(:,2), 'r');  
        end
    end
    
end
