# Supplementary material for: Simulation Study on Coverage Path Planning of Autonomous Tasks in Hilly Farmland Based on Energy Consumption Model
Source: Hindawi journal article supplement (doi:10.1155/2020/4535734), 2020-08-30
Supplement: f1 [file 4535734.f1.zip › 4535734.f1/Algorithm-pathplanning-matlab/simplifyPath.m]

function new_path = simplifyPath(path)
buffer = [];
new_path = [];
for each = path
    if isa(each{1}, 'Line2D')
        buffer = [buffer, each];
    else
        line2d = buffer{1};
        for ibuffer = buffer(2:end)
            lineEnd = line2d.data(end,:);
            t = ibuffer{1}.data(1,:);
            if t == lineEnd
                line2d.data(2,:) = ibuffer{1}.data(2,:);
            else
                error('data error');
            end
        end
        buffer = [];
        new_path = [new_path, line2d, each];
    end
end
if ~isempty(buffer)
    line2d = buffer{1};
    for ibuffer = buffer(2:end)
        lineEnd = line2d.data(end,:);
        t = ibuffer{1}.data(1,:);
        if t == lineEnd
            line2d.data(2,:) = ibuffer{1}.data(2,:);
        else
            error('data error');
        end
    end
end
end
