# Supplementary material for: Simulation Study on Coverage Path Planning of Autonomous Tasks in Hilly Farmland Based on Energy Consumption Model
Source: Hindawi journal article supplement (doi:10.1155/2020/4535734), 2020-08-30
Supplement: f1 [file 4535734.f1.zip › 4535734.f1/Algorithm-pathplanning-matlab/tk1(1).xyz]

118.8631597463	31.6405703054	57.369
118.8631597463	31.6397369721	54.839
118.8631597463	31.6389036387	50.916
118.8631597463	31.6380703054	46.998
118.8631597463	31.6372369721	44.66
118.8631597463	31.6364036387	43.816
118.8631597463	31.6355703054	41.261
118.8631597463	31.6347369721	39.893
118.8631597463	31.6339036387	38.995
118.8631597463	31.6330703054	38.833
118.8631597463	31.6322369721	36.522
118.8631597463	31.6314036387	34.607
118.8631597463	31.6305703054	32.423
118.8631597463	31.6297369721	32.68
118.8631597463	31.6289036387	34.702
118.8631597463	31.6280703054	38.15
118.8631597463	31.6272369721	39.071
118.8631597463	31.6264036387	37.868
118.8631597463	31.6255703054	33.403
118.8631597463	31.6247369721	31.269
118.8631597463	31.6239036387	31
118.8639930796	31.6405703054	58.089
118.8639930796	31.6397369721	54.244
118.8639930796	31.6389036387	49.743
118.8639930796	31.6380703054	48.059
118.8639930796	31.6372369721	46.244
118.8639930796	31.6364036387	44.244
118.8639930796	31.6355703054	41.428
118.8639930796	31.6347369721	39.584
118.8639930796	31.6339036387	36.845
118.8639930796	31.6330703054	35.816
118.8639930796	31.6322369721	35.708
118.8639930796	31.6314036387	35.131
118.8639930796	31.6305703054	33.267
118.8639930796	31.6297369721	31.244
118.8639930796	31.6289036387	32.37
118.8639930796	31.6280703054	34.204
118.8639930796	31.6272369721	35.595
118.8639930796	31.6264036387	37.464
118.8639930796	31.6255703054	36.576
118.8639930796	31.6247369721	31.976
118.8639930796	31.6239036387	31
118.8648264129	31.6405703054	61.106
118.8648264129	31.6397369721	56.451
118.8648264129	31.6389036387	52.797
118.8648264129	31.6380703054	50.399
118.8648264129	31.6372369721	48.131
118.8648264129	31.6364036387	46.077
118.8648264129	31.6355703054	43.975
118.8648264129	31.6347369721	40.899
118.8648264129	31.6339036387	37.607
118.8648264129	31.6330703054	35.369
118.8648264129	31.6322369721	34.762
118.8648264129	31.6314036387	34.47
118.8648264129	31.6305703054	34.179
118.8648264129	31.6297369721	33.207
118.8648264129	31.6289036387	32.184
118.8648264129	31.6280703054	30.946
118.8648264129	31.6272369721	31.626
118.8648264129	31.6264036387	33.702
118.8648264129	31.6255703054	35.994
118.8648264129	31.6247369721	33.902
118.8648264129	31.6239036387	31.43
118.8656597463	31.6397369721	57.208
118.8656597463	31.6389036387	54.785
118.8656597463	31.6380703054	50.814
118.8656597463	31.6372369721	47.553
118.8656597463	31.6364036387	44.655
118.8656597463	31.6355703054	43.887
118.8656597463	31.6347369721	40.809
118.8656597463	31.6339036387	37.576
118.8656597463	31.6330703054	35.607
118.8656597463	31.6322369721	34.238
118.8656597463	31.6314036387	32.946
118.8656597463	31.6305703054	31.893
118.8656597463	31.6297369721	32.048
118.8656597463	31.6289036387	31.309
118.8656597463	31.6280703054	29.494
118.8656597463	31.6272369721	28.309
118.8656597463	31.6264036387	30.096
118.8656597463	31.6255703054	33.464
118.8656597463	31.6247369721	37.625
118.8656597463	31.6239036387	32.367
118.8664930796	31.6397369721	54.486
118.8664930796	31.6389036387	52.44
118.8664930796	31.6380703054	49.916
118.8664930796	31.6372369721	47.683
118.8664930796	31.6364036387	43.451
118.8664930796	31.6355703054	41.292
118.8664930796	31.6347369721	39.267
118.8664930796	31.6339036387	38.773
118.8664930796	31.6330703054	37.697
118.8664930796	31.6322369721	35.351
118.8664930796	31.6314036387	32.768
118.8664930796	31.6305703054	31.476
118.8664930796	31.6297369721	30.476
118.8664930796	31.6289036387	29.238
118.8664930796	31.6280703054	27.369
118.8664930796	31.6272369721	26.184
118.8664930796	31.6264036387	26.34
118.8664930796	31.6255703054	30.495
118.8664930796	31.6247369721	35.019
118.8664930796	31.6239036387	31.891
118.8673264129	31.6397369721	50.34
118.8673264129	31.6389036387	49.071
118.8673264129	31.6380703054	47.916
118.8673264129	31.6372369721	47.47
118.8673264129	31.6364036387	44.868
118.8673264129	31.6355703054	42.321
118.8673264129	31.6347369721	42.589
118.8673264129	31.6339036387	43.43
118.8673264129	31.6330703054	41.238
118.8673264129	31.6322369721	37.684
118.8673264129	31.6314036387	34.213
118.8673264129	31.6305703054	32.53
118.8673264129	31.6297369721	31.238
118.8673264129	31.6289036387	29.607
118.8673264129	31.6280703054	27.66
118.8673264129	31.6272369721	26.476
118.8673264129	31.6264036387	25
118.8673264129	31.6255703054	28.073
118.8673264129	31.6247369721	31.042
118.8673264129	31.6239036387	29.434
118.8681597463	31.6397369721	49.482
118.8681597463	31.6389036387	46.714
118.8681597463	31.6380703054	47.107
118.8681597463	31.6372369721	45.762
118.8681597463	31.6364036387	44.601
118.8681597463	31.6355703054	44.077
118.8681597463	31.6347369721	45.257
118.8681597463	31.6339036387	43.91
118.8681597463	31.6330703054	39.939
118.8681597463	31.6322369721	36.678
118.8681597463	31.6314036387	34.969
118.8681597463	31.6305703054	33.077
118.8681597463	31.6297369721	31.077
118.8681597463	31.6289036387	29.893
118.8681597463	31.6280703054	28.553
118.8681597463	31.6272369721	27
118.8681597463	31.6264036387	24.499
118.8681597463	31.6255703054	25.155
118.8681597463	31.6247369721	26.334
118.8681597463	31.6239036387	24.231
118.8689930796	31.6397369721	52.933
118.8689930796	31.6389036387	48.59
118.8689930796	31.6380703054	47.263
118.8689930796	31.6372369721	43.624
118.8689930796	31.6364036387	41.78
118.8689930796	31.6355703054	42.595
118.8689930796	31.6347369721	42.392
118.8689930796	31.6339036387	40.185
118.8689930796	31.6330703054	37.499
118.8689930796	31.6322369721	35.029
118.8689930796	31.6314036387	34.108
118.8689930796	31.6305703054	33.082
118.8689930796	31.6297369721	31.482
118.8689930796	31.6289036387	29.875
118.8689930796	31.6280703054	28.87
118.8689930796	31.6272369721	26.499
118.8689930796	31.6264036387	24.607
118.8689930796	31.6255703054	23.578
118.8689930796	31.6247369721	22.839
118.8689930796	31.6239036387	22.946
118.8698264129	31.6389036387	51.636
118.8698264129	31.6380703054	45.791
118.8698264129	31.6372369721	40.63
118.8698264129	31.6364036387	38.553
118.8698264129	31.6355703054	38.971
118.8698264129	31.6347369721	40.858
118.8698264129	31.6339036387	38.939
118.8698264129	31.6330703054	37.023
118.8698264129	31.6322369721	35.655
118.8698264129	31.6314036387	34.023
118.8698264129	31.6305703054	34.524
118.8698264129	31.6297369721	34.131
118.8698264129	31.6289036387	32.267
118.8698264129	31.6280703054	28.952
118.8698264129	31.6272369721	26.66
118.8698264129	31.6264036387	25
118.8698264129	31.6255703054	22.499
118.8698264129	31.6247369721	22
118.8698264129	31.6239036387	22.816
118.8706597463	31.6389036387	52.868
118.8706597463	31.6380703054	45.713
118.8706597463	31.6372369721	40.451
118.8706597463	31.6364036387	38.632
118.8706597463	31.6355703054	37.023
118.8706597463	31.6347369721	36.47
118.8706597463	31.6339036387	36.179
118.8706597463	31.6330703054	35.785
118.8706597463	31.6322369721	35.029
118.8706597463	31.6314036387	33.584
118.8706597463	31.6305703054	33.156
118.8706597463	31.6297369721	32.649
118.8706597463	31.6289036387	33.017
118.8706597463	31.6280703054	30.236
118.8706597463	31.6272369721	28.19
118.8706597463	31.6264036387	24.714
118.8706597463	31.6255703054	22.607
118.8706597463	31.6247369721	22.054
118.8706597463	31.6239036387	22.816
118.8714930796	31.6389036387	51.809
118.8714930796	31.6380703054	45.653
118.8714930796	31.6372369721	41.868
118.8714930796	31.6364036387	38.505
118.8714930796	31.6355703054	36.108
118.8714930796	31.6347369721	34.893
118.8714930796	31.6339036387	33.893
118.8714930796	31.6330703054	34.048
118.8714930796	31.6322369721	35.28
118.8714930796	31.6314036387	33.57
118.8714930796	31.6305703054	31.392
118.8714930796	31.6297369721	29.131
118.8714930796	31.6289036387	30.102
118.8714930796	31.6280703054	30.179
118.8714930796	31.6272369721	29.785
118.8714930796	31.6264036387	25.528
118.8714930796	31.6255703054	23.292
118.8714930796	31.6247369721	21.946
118.8714930796	31.6239036387	22.762
118.8723264129	31.6389036387	48.808
118.8723264129	31.6380703054	43.999
118.8723264129	31.6372369721	41.946
118.8723264129	31.6364036387	40.791
118.8723264129	31.6355703054	36.743
118.8723264129	31.6347369721	34.822
118.8723264129	31.6339036387	33.53
118.8723264129	31.6330703054	32
118.8723264129	31.6322369721	31.232
118.8723264129	31.6314036387	30.547
118.8723264129	31.6305703054	30.655
118.8723264129	31.6297369721	29.213
118.8723264129	31.6289036387	28.977
118.8723264129	31.6280703054	27.709
118.8723264129	31.6272369721	27.756
118.8723264129	31.6264036387	26.1
118.8723264129	31.6255703054	23.737
118.8723264129	31.6247369721	21.185
118.8723264129	31.6239036387	22.34
118.8731597463	31.6380703054	42.624
118.8731597463	31.6372369721	39.964
118.8731597463	31.6364036387	41.071
118.8731597463	31.6355703054	39.106
118.8731597463	31.6347369721	36.952
118.8731597463	31.6339036387	34.714
118.8731597463	31.6330703054	32.083
118.8731597463	31.6322369721	29.476
118.8731597463	31.6314036387	28.762
118.8731597463	31.6305703054	28.81
118.8731597463	31.6297369721	30.125
118.8731597463	31.6289036387	29.499
118.8731597463	31.6280703054	27.083
118.8731597463	31.6272369721	25.53
118.8731597463	31.6264036387	24.578
118.8731597463	31.6255703054	24.077
118.8731597463	31.6247369721	20.737
118.8731597463	31.6239036387	21.631
118.8739930796	31.6480703054	141.011
118.8739930796	31.6380703054	39.63
118.8739930796	31.6372369721	35.786
118.8739930796	31.6364036387	37.912
118.8739930796	31.6355703054	39.017
118.8739930796	31.6347369721	37.494
118.8739930796	31.6339036387	34.916
118.8739930796	31.6330703054	33.261
118.8739930796	31.6322369721	30.213
118.8739930796	31.6314036387	28.292
118.8739930796	31.6305703054	26.607
118.8739930796	31.6297369721	27.787
118.8739930796	31.6289036387	28.941
118.8739930796	31.6280703054	28.207
118.8739930796	31.6272369721	26.369
118.8739930796	31.6264036387	23.553
118.8739930796	31.6255703054	23.34
118.8739930796	31.6247369721	20.63
118.8739930796	31.6239036387	21.869
118.8748264129	31.6480703054	127.919
118.8748264129	31.6472369721	161.548
118.8748264129	31.6464036387	188.191
118.8748264129	31.6389036387	43.439
118.8748264129	31.6380703054	38.231
118.8748264129	31.6372369721	34.29
118.8748264129	31.6364036387	34.025
118.8748264129	31.6355703054	35.28
118.8748264129	31.6347369721	34.624
118.8748264129	31.6339036387	33.261
118.8748264129	31.6330703054	32.524
118.8748264129	31.6322369721	31.023
118.8748264129	31.6314036387	28.499
118.8748264129	31.6305703054	26.946
118.8748264129	31.6297369721	26.131
118.8748264129	31.6289036387	26.578
118.8748264129	31.6280703054	27.286
118.8748264129	31.6272369721	25.547
118.8748264129	31.6264036387	23.154
118.8748264129	31.6255703054	21.655
118.8748264129	31.6247369721	20.261
118.8748264129	31.6239036387	22.685
118.8756597463	31.6480703054	120.606
118.8756597463	31.6472369721	148.871
118.8756597463	31.6464036387	163.576
118.8756597463	31.6455703054	167.977
118.8756597463	31.6389036387	39.784
118.8756597463	31.6380703054	36.208
118.8756597463	31.6372369721	35.131
118.8756597463	31.6364036387	33.267
118.8756597463	31.6355703054	31.686
118.8756597463	31.6347369721	32.232
118.8756597463	31.6339036387	33.13
118.8756597463	31.6330703054	31.423
118.8756597463	31.6322369721	29.946
118.8756597463	31.6314036387	28.077
118.8756597463	31.6305703054	26.315
118.8756597463	31.6297369721	25.762
118.8756597463	31.6289036387	25.47
118.8756597463	31.6280703054	26.13
118.8756597463	31.6272369721	23.607
118.8756597463	31.6264036387	22.184
118.8756597463	31.6255703054	20.369
118.8756597463	31.6247369721	20.238
118.8756597463	31.6239036387	23.792
118.8764930796	31.6480703054	116.629
118.8764930796	31.6472369721	132.98
118.8764930796	31.6464036387	134.572
118.8764930796	31.6455703054	149.78
118.8764930796	31.6447369721	156.859
118.8764930796	31.6439036387	145.295
118.8764930796	31.6389036387	37.653
118.8764930796	31.6380703054	34.839
118.8764930796	31.6372369721	34.417
118.8764930796	31.6364036387	34.417
118.8764930796	31.6355703054	31.052
118.8764930796	31.6347369721	30.631
118.8764930796	31.6339036387	32.917
118.8764930796	31.6330703054	31.921
118.8764930796	31.6322369721	30.19
118.8764930796	31.6314036387	27.768
118.8764930796	31.6305703054	25.762
118.8764930796	31.6297369721	24.839
118.8764930796	31.6289036387	23.417
118.8764930796	31.6280703054	25.572
118.8764930796	31.6272369721	23.1
118.8764930796	31.6264036387	21.601
118.8764930796	31.6255703054	20.261
118.8764930796	31.6247369721	21.291
118.8764930796	31.6239036387	25.186
118.8773264129	31.6480703054	101.99
118.8773264129	31.6472369721	110.294
118.8773264129	31.6464036387	108.003
118.8773264129	31.6455703054	124.838
118.8773264129	31.6447369721	126.725
118.8773264129	31.6439036387	111.33
118.8773264129	31.6430703054	93.072
118.8773264129	31.6422369721	76.012
118.8773264129	31.6414036387	59.187
118.8773264129	31.6389036387	35.333
118.8773264129	31.6380703054	32.862
118.8773264129	31.6372369721	32.655
118.8773264129	31.6364036387	32.708
118.8773264129	31.6355703054	31.553
118.8773264129	31.6347369721	30.238
118.8773264129	31.6339036387	31.155
118.8773264129	31.6330703054	32.232
118.8773264129	31.6322369721	31.601
118.8773264129	31.6314036387	27.916
118.8773264129	31.6305703054	24.576
118.8773264129	31.6297369721	24
118.8773264129	31.6289036387	22.029
118.8773264129	31.6280703054	22.841
118.8773264129	31.6272369721	21.154
118.8773264129	31.6264036387	20.369
118.8773264129	31.6255703054	20.054
118.8773264129	31.6247369721	22.685
118.8773264129	31.6239036387	25.739
118.8781597463	31.6480703054	84.829
118.8781597463	31.6472369721	86.846
118.8781597463	31.6464036387	86.897
118.8781597463	31.6455703054	98.973
118.8781597463	31.6447369721	97.493
118.8781597463	31.6439036387	83.185
118.8781597463	31.6430703054	69.699
118.8781597463	31.6422369721	59.992
118.8781597463	31.6414036387	48.579
118.8781597463	31.6405703054	40.224
118.8781597463	31.6397369721	34.653
118.8781597463	31.6389036387	31.839
118.8781597463	31.6380703054	30.839
118.8781597463	31.6372369721	31.286
118.8781597463	31.6364036387	31.655
118.8781597463	31.6355703054	31.946
118.8781597463	31.6347369721	30.607
118.8781597463	31.6339036387	29.816
118.8781597463	31.6330703054	29.81
118.8781597463	31.6322369721	29.731
118.8781597463	31.6314036387	26.582
118.8781597463	31.6305703054	25.059
118.8781597463	31.6297369721	24.161
118.8781597463	31.6289036387	22.946
118.8781597463	31.6280703054	21.315
118.8781597463	31.6272369721	19.946
118.8781597463	31.6264036387	20.762
118.8781597463	31.6255703054	20.66
118.8781597463	31.6247369721	23.608
118.8781597463	31.6239036387	26.501
118.8789930796	31.6480703054	67.287
118.8789930796	31.6472369721	65.517
118.8789930796	31.6464036387	67.386
118.8789930796	31.6455703054	76.276
118.8789930796	31.6447369721	71.403
118.8789930796	31.6439036387	62.67
118.8789930796	31.6430703054	53.599
118.8789930796	31.6422369721	45.765
118.8789930796	31.6414036387	39.141
118.8789930796	31.6405703054	35.409
118.8789930796	31.6397369721	32.624
118.8789930796	31.6389036387	29.916
118.8789930796	31.6380703054	29.655
118.8789930796	31.6372369721	29.946
118.8789930796	31.6364036387	30.34
118.8789930796	31.6355703054	31.708
118.8789930796	31.6347369721	31.184
118.8789930796	31.6339036387	29.369
118.8789930796	31.6330703054	27.369
118.8789930796	31.6322369721	27.918
118.8789930796	31.6314036387	27.547
118.8789930796	31.6305703054	27.553
118.8789930796	31.6297369721	24.661
118.8789930796	31.6289036387	22.131
118.8789930796	31.6280703054	20.893
118.8789930796	31.6272369721	19.791
118.8789930796	31.6264036387	20.739
118.8789930796	31.6255703054	21.816
118.8789930796	31.6247369721	24.447
118.8789930796	31.6239036387	26.393
118.8798264129	31.6480703054	52.755
118.8798264129	31.6472369721	50.314
118.8798264129	31.6464036387	54.107
118.8798264129	31.6455703054	59.025
118.8798264129	31.6447369721	53.051
118.8798264129	31.6439036387	47.32
118.8798264129	31.6430703054	42.093
118.8798264129	31.6422369721	38.1
118.8798264129	31.6414036387	33.101
118.8798264129	31.6405703054	31.309
118.8798264129	31.6397369721	29.969
118.8798264129	31.6389036387	28.315
118.8798264129	31.6380703054	28.34
118.8798264129	31.6372369721	29.47
118.8798264129	31.6364036387	28.893
118.8798264129	31.6355703054	30.679
118.8798264129	31.6347369721	30.547
118.8798264129	31.6339036387	29.737
118.8798264129	31.6330703054	27.952
118.8798264129	31.6322369721	26.53
118.8798264129	31.6314036387	25.578
118.8798264129	31.6305703054	27.626
118.8798264129	31.6297369721	24.998
118.8798264129	31.6289036387	21.845
118.8798264129	31.6280703054	20.476
118.8798264129	31.6272369721	20.869
118.8798264129	31.6264036387	21
118.8798264129	31.6255703054	21.102
118.8798264129	31.6247369721	23.334
118.8798264129	31.6239036387	24.887
118.8806597463	31.6480703054	39.958
118.8806597463	31.6472369721	40.672
118.8806597463	31.6464036387	45.489
118.8806597463	31.6455703054	47.221
118.8806597463	31.6447369721	42.141
118.8806597463	31.6439036387	38.749
118.8806597463	31.6430703054	37.196
118.8806597463	31.6422369721	35.225
118.8806597463	31.6414036387	30.891
118.8806597463	31.6405703054	28.709
118.8806597463	31.6397369721	28.417
118.8806597463	31.6389036387	28.077
118.8806597463	31.6380703054	27.422
118.8806597463	31.6372369721	28.685
118.8806597463	31.6364036387	27.709
118.8806597463	31.6355703054	27.994
118.8806597463	31.6347369721	29.552
118.8806597463	31.6339036387	30.555
118.8806597463	31.6330703054	28.839
118.8806597463	31.6322369721	27.261
118.8806597463	31.6314036387	24.791
118.8806597463	31.6305703054	25.447
118.8806597463	31.6297369721	25.131
118.8806597463	31.6289036387	22.553
118.8806597463	31.6280703054	20.946
118.8806597463	31.6272369721	20.47
118.8806597463	31.6264036387	20.417
118.8806597463	31.6255703054	19.023
118.8806597463	31.6247369721	20.34
118.8806597463	31.6239036387	22.815
118.8814930796	31.6480703054	33.779
118.8814930796	31.6472369721	35.566
118.8814930796	31.6464036387	40.274
118.8814930796	31.6455703054	39.619
118.8814930796	31.6447369721	35.885
118.8814930796	31.6439036387	33.256
118.8814930796	31.6430703054	31.202
118.8814930796	31.6422369721	31.785
118.8814930796	31.6414036387	30.369
118.8814930796	31.6405703054	27.791
118.8814930796	31.6397369721	26.816
118.8814930796	31.6389036387	27.286
118.8814930796	31.6380703054	27.417
118.8814930796	31.6372369721	28.47
118.8814930796	31.6364036387	26.737
118.8814930796	31.6355703054	25.578
118.8814930796	31.6347369721	30.072
118.8814930796	31.6339036387	29.969
118.8814930796	31.6330703054	27.023
118.8814930796	31.6322369721	26.417
118.8814930796	31.6314036387	25.023
118.8814930796	31.6305703054	24.232
118.8814930796	31.6297369721	24.125
118.8814930796	31.6289036387	22.392
118.8814930796	31.6280703054	20.369
118.8814930796	31.6272369721	18.946
118.8814930796	31.6264036387	18.232
118.8814930796	31.6255703054	17.785
118.8814930796	31.6247369721	19.577
118.8814930796	31.6239036387	23.025
118.8823264129	31.6480703054	30.156
118.8823264129	31.6472369721	29.887
118.8823264129	31.6464036387	34.013
118.8823264129	31.6455703054	33.803
118.8823264129	31.6447369721	32.148
118.8823264129	31.6439036387	30.1
118.8823264129	31.6430703054	28.315
118.8823264129	31.6422369721	30.311
118.8823264129	31.6414036387	30.392
118.8823264129	31.6405703054	28.423
118.8823264129	31.6397369721	26.369
118.8823264129	31.6389036387	25.762
118.8823264129	31.6380703054	25.47
118.8823264129	31.6372369721	27.048
118.8823264129	31.6364036387	27.077
118.8823264129	31.6355703054	24.553
118.8823264129	31.6347369721	27.364
118.8823264129	31.6339036387	28.363
118.8823264129	31.6330703054	26.106
118.8823264129	31.6322369721	25.345
118.8823264129	31.6314036387	24.476
118.8823264129	31.6305703054	22.423
118.8823264129	31.6297369721	21.762
118.8823264129	31.6289036387	21.708
118.8823264129	31.6280703054	20.077
118.8823264129	31.6272369721	18.077
118.8823264129	31.6264036387	16.553
118.8823264129	31.6255703054	17.107
118.8823264129	31.6247369721	19.739
118.8823264129	31.6239036387	21.787
118.8831597463	31.6480703054	29.136
118.8831597463	31.6472369721	26.816
118.8831597463	31.6464036387	28.388
118.8831597463	31.6455703054	28.833
118.8831597463	31.6447369721	28.256
118.8831597463	31.6439036387	27.887
118.8831597463	31.6430703054	27.493
118.8831597463	31.6422369721	27.655
118.8831597463	31.6414036387	30.393
118.8831597463	31.6405703054	28.791
118.8831597463	31.6397369721	26.423
118.8831597463	31.6389036387	24.709
118.8831597463	31.6380703054	23.839
118.8831597463	31.6372369721	25.577
118.8831597463	31.6364036387	26.34
118.8831597463	31.6355703054	24.208
118.8831597463	31.6347369721	25.577
118.8831597463	31.6339036387	26.816
118.8831597463	31.6330703054	26.762
118.8831597463	31.6322369721	26.131
118.8831597463	31.6314036387	24.709
118.8831597463	31.6305703054	21.732
118.8831597463	31.6297369721	20.547
118.8831597463	31.6289036387	20.655
118.8831597463	31.6280703054	19.315
118.8831597463	31.6272369721	17.369
118.8831597463	31.6264036387	17.238
118.8831597463	31.6255703054	17.869
118.8831597463	31.6247369721	20.209
118.8831597463	31.6239036387	20.131
118.8839930796	31.6480703054	29.97
118.8839930796	31.6472369721	25.576
118.8839930796	31.6464036387	25.286
118.8839930796	31.6455703054	25.417
118.8839930796	31.6447369721	24.941
118.8839930796	31.6439036387	24.731
118.8839930796	31.6430703054	25.762
118.8839930796	31.6422369721	27.054
118.8839930796	31.6414036387	30.078
118.8839930796	31.6405703054	29.077
118.8839930796	31.6397369721	26.023
118.8839930796	31.6389036387	23.208
118.8839930796	31.6380703054	22.708
118.8839930796	31.6372369721	24.679
118.8839930796	31.6364036387	24.071
118.8839930796	31.6355703054	23.154
118.8839930796	31.6347369721	25.447
118.8839930796	31.6339036387	26.34
118.8839930796	31.6330703054	26.077
118.8839930796	31.6322369721	26
118.8839930796	31.6314036387	22.839
118.8839930796	31.6305703054	19.338
118.8839930796	31.6297369721	18.946
118.8839930796	31.6289036387	19.578
118.8839930796	31.6280703054	19.131
118.8839930796	31.6272369721	17.369
118.8839930796	31.6264036387	17.816
118.8839930796	31.6255703054	18.476
118.8839930796	31.6247369721	19.739
118.8839930796	31.6239036387	19.762
118.8848264129	31.6480703054	28.208
118.8848264129	31.6472369721	24.684
118.8848264129	31.6464036387	23.524
118.8848264129	31.6455703054	23.655
118.8848264129	31.6447369721	22.791
118.8848264129	31.6439036387	24.453
118.8848264129	31.6430703054	26.506
118.8848264129	31.6422369721	27.793
118.8848264129	31.6414036387	29.155
118.8848264129	31.6405703054	28.261
118.8848264129	31.6397369721	24.975
118.8848264129	31.6389036387	22.898
118.8848264129	31.6380703054	22.345
118.8848264129	31.6372369721	22.394
118.8848264129	31.6364036387	21.023
118.8848264129	31.6355703054	23.053
118.8848264129	31.6347369721	24.603
118.8848264129	31.6339036387	24.256
118.8848264129	31.6330703054	25.178
118.8848264129	31.6322369721	25.179
118.8848264129	31.6314036387	20.707
118.8848264129	31.6305703054	18.315
118.8848264129	31.6297369721	18.816
118.8848264129	31.6289036387	18.762
118.8848264129	31.6280703054	18.708
118.8848264129	31.6272369721	17.315
118.8848264129	31.6264036387	17.816
118.8848264129	31.6255703054	19.631
118.8848264129	31.6247369721	20
118.8848264129	31.6239036387	18.946
118.8856597463	31.6480703054	26.839
118.8856597463	31.6472369721	24.208
118.8856597463	31.6464036387	22.553
118.8856597463	31.6455703054	23.107
118.8856597463	31.6447369721	24.583
118.8856597463	31.6439036387	27.798
118.8856597463	31.6430703054	29.138
118.8856597463	31.6422369721	28.238
118.8856597463	31.6414036387	27.524
118.8856597463	31.6405703054	27.655
118.8856597463	31.6397369721	26.213
118.8856597463	31.6389036387	24.584
118.8856597463	31.6380703054	23.238
118.8856597463	31.6372369721	21.131
118.8856597463	31.6364036387	20.131
118.8856597463	31.6355703054	24.078
118.8856597463	31.6347369721	23.029
118.8856597463	31.6339036387	22.108
118.8856597463	31.6330703054	22.918
118.8856597463	31.6322369721	22.309
118.8856597463	31.6314036387	19.338
118.8856597463	31.6305703054	18.369
118.8856597463	31.6297369721	18.631
118.8856597463	31.6289036387	17.893
118.8856597463	31.6280703054	17.946
118.8856597463	31.6272369721	17.184
118.8856597463	31.6264036387	17.34
118.8856597463	31.6255703054	19.286
118.8856597463	31.6247369721	19.47
118.8856597463	31.6239036387	18.023
118.8864930796	31.6480703054	25.661
118.8864930796	31.6472369721	23.131
118.8864930796	31.6464036387	22.946
118.8864930796	31.6455703054	23.578
118.8864930796	31.6447369721	26.393
118.8864930796	31.6439036387	30.602
118.8864930796	31.6430703054	30.023
118.8864930796	31.6422369721	28.553
118.8864930796	31.6414036387	26.185
118.8864930796	31.6405703054	26.048
118.8864930796	31.6397369721	27.654
118.8864930796	31.6389036387	25.791
118.8864930796	31.6380703054	23.66
118.8864930796	31.6372369721	20.607
118.8864930796	31.6364036387	20
118.8864930796	31.6355703054	23.364
118.8864930796	31.6347369721	24.499
118.8864930796	31.6339036387	22.238
118.8864930796	31.6330703054	20.655
118.8864930796	31.6322369721	19.601
118.8864930796	31.6314036387	18.261
118.8864930796	31.6305703054	18.578
118.8864930796	31.6297369721	18.131
118.8864930796	31.6289036387	17.184
118.8864930796	31.6280703054	17.578
118.8864930796	31.6272369721	16.655
118.8864930796	31.6264036387	16.077
118.8864930796	31.6255703054	18.209
118.8864930796	31.6247369721	17.655
118.8864930796	31.6239036387	16.839
118.8873264129	31.6480703054	25.285
118.8873264129	31.6472369721	22.683
118.8873264129	31.6464036387	22.394
118.8873264129	31.6455703054	22.417
118.8873264129	31.6447369721	25.917
118.8873264129	31.6439036387	29.393
118.8873264129	31.6430703054	29.422
118.8873264129	31.6422369721	28.816
118.8873264129	31.6414036387	25.684
118.8873264129	31.6405703054	24.184
118.8873264129	31.6397369721	26.073
118.8873264129	31.6389036387	25.624
118.8873264129	31.6380703054	24.023
118.8873264129	31.6372369721	20.684
118.8873264129	31.6364036387	19.762
118.8873264129	31.6355703054	20.864
118.8873264129	31.6347369721	23.912
118.8873264129	31.6339036387	21.415
118.8873264129	31.6330703054	18.839
118.8873264129	31.6322369721	17.839
118.8873264129	31.6314036387	17.708
118.8873264129	31.6305703054	17.946
118.8873264129	31.6297369721	17.762
118.8873264129	31.6289036387	17.131
118.8873264129	31.6280703054	17
118.8873264129	31.6272369721	15.845
118.8873264129	31.6264036387	15.923
118.8873264129	31.6255703054	17.393
118.8873264129	31.6247369721	17.029
118.8873264129	31.6239036387	16.875
118.8881597463	31.6480703054	23.868
118.8881597463	31.6472369721	22.816
118.8881597463	31.6464036387	21.077
118.8881597463	31.6455703054	20.708
118.8881597463	31.6447369721	24.786
118.8881597463	31.6439036387	28.495
118.8881597463	31.6430703054	29.363
118.8881597463	31.6422369721	28.261
118.8881597463	31.6414036387	26.029
118.8881597463	31.6405703054	24.53
118.8881597463	31.6397369721	23.476
118.8881597463	31.6389036387	23.869
118.8881597463	31.6380703054	22.471
118.8881597463	31.6372369721	20.154
118.8881597463	31.6364036387	18.655
118.8881597463	31.6355703054	18.417
118.8881597463	31.6347369721	19.334
118.8881597463	31.6339036387	18.964
118.8881597463	31.6330703054	17.1
118.8881597463	31.6322369721	16.47
118.8881597463	31.6314036387	16.417
118.8881597463	31.6305703054	17.47
118.8881597463	31.6297369721	16.893
118.8881597463	31.6289036387	16.946
118.8881597463	31.6280703054	17
118.8881597463	31.6272369721	17
118.8881597463	31.6264036387	15.946
118.8881597463	31.6255703054	17
118.8881597463	31.6247369721	19.637
118.8881597463	31.6239036387	19.929
118.8889930796	31.6480703054	23.655
118.8889930796	31.6472369721	22.023
118.8889930796	31.6464036387	20.077
118.8889930796	31.6455703054	19.708
118.8889930796	31.6447369721	23.549
118.8889930796	31.6439036387	25.81
118.8889930796	31.6430703054	26.941
118.8889930796	31.6422369721	26.887
118.8889930796	31.6414036387	26.969
118.8889930796	31.6405703054	25.607
118.8889930796	31.6397369721	24.476
118.8889930796	31.6389036387	24.53
118.8889930796	31.6380703054	21.321
118.8889930796	31.6372369721	20.006
118.8889930796	31.6364036387	17.53
118.8889930796	31.6355703054	16.762
118.8889930796	31.6347369721	15.893
118.8889930796	31.6339036387	15.232
118.8889930796	31.6330703054	15.839
118.8889930796	31.6322369721	15.422
118.8889930796	31.6314036387	15.054
118.8889930796	31.6305703054	16.393
118.8889930796	31.6297369721	16.369
118.8889930796	31.6289036387	16.869
118.8889930796	31.6280703054	17.476
118.8889930796	31.6272369721	17.108
118.8889930796	31.6264036387	15.607
118.8889930796	31.6255703054	18.214
118.8889930796	31.6247369721	22.477
118.8889930796	31.6239036387	22.238
118.8898264129	31.6480703054	22.553
118.8898264129	31.6472369721	21
118.8898264129	31.6464036387	19.315
118.8898264129	31.6455703054	19
118.8898264129	31.6447369721	21.787
118.8898264129	31.6439036387	23.47
118.8898264129	31.6430703054	24.048
118.8898264129	31.6422369721	24.023
118.8898264129	31.6414036387	26.685
118.8898264129	31.6405703054	27.19
118.8898264129	31.6397369721	26.589
118.8898264129	31.6389036387	26.322
118.8898264129	31.6380703054	23.743
118.8898264129	31.6372369721	22.453
118.8898264129	31.6364036387	18.927
118.8898264129	31.6355703054	16.637
118.8898264129	31.6347369721	15
118.8898264129	31.6339036387	14.029
118.8898264129	31.6330703054	15.846
118.8898264129	31.6322369721	16.768
118.8898264129	31.6314036387	16.059
118.8898264129	31.6305703054	16.691
118.8898264129	31.6297369721	16.977
118.8898264129	31.6289036387	17.238
118.8898264129	31.6280703054	18.209
118.8898264129	31.6272369721	17.023
118.8898264129	31.6264036387	16.131
118.8898264129	31.6255703054	21.268
118.8898264129	31.6247369721	26.571
118.8898264129	31.6239036387	24.442
118.8906597463	31.6480703054	23.108
118.8906597463	31.6472369721	20.553
118.8906597463	31.6464036387	19.184
118.8906597463	31.6455703054	18.762
118.8906597463	31.6447369721	20.102
118.8906597463	31.6439036387	21.81
118.8906597463	31.6430703054	21.547
118.8906597463	31.6422369721	23.286
118.8906597463	31.6414036387	26.971
118.8906597463	31.6405703054	29.577
118.8906597463	31.6397369721	29.524
118.8906597463	31.6389036387	27.208
118.8906597463	31.6380703054	25.893
118.8906597463	31.6372369721	23.975
118.8906597463	31.6364036387	21.952
118.8906597463	31.6355703054	18.559
118.8906597463	31.6347369721	15.19
118.8906597463	31.6339036387	15.739
118.8906597463	31.6330703054	16.102
118.8906597463	31.6322369721	17.994
118.8906597463	31.6314036387	17.839
118.8906597463	31.6305703054	17.81
118.8906597463	31.6297369721	16.678
118.8906597463	31.6289036387	16.756
118.8906597463	31.6280703054	16.731
118.8906597463	31.6272369721	16.131
118.8906597463	31.6264036387	16.476
118.8906597463	31.6255703054	25.216
118.8906597463	31.6247369721	35.799
118.8906597463	31.6239036387	30.511
118.8914930796	31.6480703054	23.445
118.8914930796	31.6472369721	21.321
118.8914930796	31.6464036387	19.346
118.8914930796	31.6455703054	18.184
118.8914930796	31.6447369721	18.578
118.8914930796	31.6439036387	19.286
118.8914930796	31.6430703054	19.892
118.8914930796	31.6422369721	22.209
118.8914930796	31.6414036387	25.971
118.8914930796	31.6405703054	28.679
118.8914930796	31.6397369721	27.969
118.8914930796	31.6389036387	25.839
118.8914930796	31.6380703054	24.601
118.8914930796	31.6372369721	24.179
118.8914930796	31.6364036387	22.494
118.8914930796	31.6355703054	19.916
118.8914930796	31.6347369721	16.868
118.8914930796	31.6339036387	15.816
118.8914930796	31.6330703054	14.315
118.8914930796	31.6322369721	15.971
118.8914930796	31.6314036387	16.179
118.8914930796	31.6305703054	14.732
118.8914930796	31.6297369721	14.655
118.8914930796	31.6289036387	14.369
118.8914930796	31.6280703054	15.685
118.8914930796	31.6272369721	16
118.8914930796	31.6264036387	18.345
118.8914930796	31.6255703054	27.235
118.8914930796	31.6247369721	37.247
118.8914930796	31.6239036387	32.014
118.8923264129	31.6480703054	23.286
118.8923264129	31.6472369721	23.131
118.8923264129	31.6464036387	19.737
118.8923264129	31.6455703054	18.422
118.8923264129	31.6447369721	18.292
118.8923264129	31.6439036387	18.292
118.8923264129	31.6430703054	19.685
118.8923264129	31.6422369721	21.393
118.8923264129	31.6414036387	24.495
118.8923264129	31.6405703054	26.654
118.8923264129	31.6397369721	27
118.8923264129	31.6389036387	25.029
118.8923264129	31.6380703054	23.768
118.8923264129	31.6372369721	22.53
118.8923264129	31.6364036387	20.66
118.8923264129	31.6355703054	18.423
118.8923264129	31.6347369721	16.709
118.8923264129	31.6339036387	15.499
118.8923264129	31.6330703054	14.238
118.8923264129	31.6322369721	14.578
118.8923264129	31.6314036387	14.369
118.8923264129	31.6305703054	13.714
118.8923264129	31.6297369721	14.399
118.8923264129	31.6289036387	15.399
118.8923264129	31.6280703054	16.399
118.8923264129	31.6272369721	16.583
118.8923264129	31.6264036387	19.948
118.8923264129	31.6255703054	25.364
118.8923264129	31.6247369721	29.305
118.8923264129	31.6239036387	28.701
118.8931597463	31.6480703054	22.209
118.8931597463	31.6472369721	23.422
118.8931597463	31.6464036387	20.083
118.8931597463	31.6455703054	18.578
118.8931597463	31.6447369721	18.417
118.8931597463	31.6439036387	18.417
118.8931597463	31.6430703054	19.47
118.8931597463	31.6422369721	21
118.8931597463	31.6414036387	22.685
118.8931597463	31.6405703054	25.549
118.8931597463	31.6397369721	25.887
118.8931597463	31.6389036387	25.969
118.8931597463	31.6380703054	25.898
118.8931597463	31.6372369721	24.72
118.8931597463	31.6364036387	22.827
118.8931597463	31.6355703054	19.536
118.8931597463	31.6347369721	16.19
118.8931597463	31.6339036387	15.447
118.8931597463	31.6330703054	14.261
118.8931597463	31.6322369721	14.238
118.8931597463	31.6314036387	15.107
118.8931597463	31.6305703054	15.768
118.8931597463	31.6297369721	16.453
118.8931597463	31.6289036387	17.161
118.8931597463	31.6280703054	18.107
118.8931597463	31.6272369721	18.292
118.8931597463	31.6264036387	19.447
118.8931597463	31.6255703054	23.549
118.8931597463	31.6247369721	24.417
118.8931597463	31.6239036387	26.048
118.8939930796	31.6480703054	21.286
118.8939930796	31.6472369721	23.441
118.8939930796	31.6464036387	20.469
118.8939930796	31.6455703054	17.261
118.8939930796	31.6447369721	16.708
118.8939930796	31.6439036387	17.66
118.8939930796	31.6430703054	19.744
118.8939930796	31.6422369721	21.9
118.8939930796	31.6414036387	22.869
118.8939930796	31.6405703054	22.864
118.8939930796	31.6397369721	22.493
118.8939930796	31.6389036387	24.864
118.8939930796	31.6380703054	26.81
118.8939930796	31.6372369721	27.363
118.8939930796	31.6364036387	26.261
118.8939930796	31.6355703054	21.922
118.8939930796	31.6347369721	17.5
118.8939930796	31.6339036387	14.499
118.8939930796	31.6330703054	14.238
118.8939930796	31.6322369721	15.107
118.8939930796	31.6314036387	16.107
118.8939930796	31.6305703054	17.923
118.8939930796	31.6297369721	18.292
118.8939930796	31.6289036387	18.292
118.8939930796	31.6280703054	18.869
118.8939930796	31.6272369721	19.238
118.8939930796	31.6264036387	19.054
118.8939930796	31.6255703054	21.549
118.8939930796	31.6247369721	22.363
118.8939930796	31.6239036387	24.286
118.8948264129	31.6480703054	20.263
118.8948264129	31.6472369721	20.232
118.8948264129	31.6464036387	18.494
118.8948264129	31.6455703054	16.392
118.8948264129	31.6447369721	16
118.8948264129	31.6439036387	19.263
118.8948264129	31.6430703054	22.685
118.8948264129	31.6422369721	23.292
118.8948264129	31.6414036387	22.578
118.8948264129	31.6405703054	20.446
118.8948264129	31.6397369721	20.578
118.8948264129	31.6389036387	22.441
118.8948264129	31.6380703054	24.125
118.8948264129	31.6372369721	24.756
118.8948264129	31.6364036387	25.071
118.8948264129	31.6355703054	21.523
118.8948264129	31.6347369721	16.868
118.8948264129	31.6339036387	14.607
118.8948264129	31.6330703054	14.869
118.8948264129	31.6322369721	15.816
118.8948264129	31.6314036387	16.578
118.8948264129	31.6305703054	18.577
118.8948264129	31.6297369721	18.762
118.8948264129	31.6289036387	18.946
118.8948264129	31.6280703054	19.238
118.8948264129	31.6272369721	19.631
118.8948264129	31.6264036387	19.369
118.8948264129	31.6255703054	20.107
118.8948264129	31.6247369721	21.345
118.8948264129	31.6239036387	23.554
118.8956597463	31.6480703054	18.941
118.8956597463	31.6472369721	18.207
118.8956597463	31.6464036387	16.369
118.8956597463	31.6455703054	15.524
118.8956597463	31.6447369721	15.892
118.8956597463	31.6439036387	19.025
118.8956597463	31.6430703054	22.495
118.8956597463	31.6422369721	23.363
118.8956597463	31.6414036387	21.446
118.8956597463	31.6405703054	20.184
118.8956597463	31.6397369721	19.762
118.8956597463	31.6389036387	19.47
118.8956597463	31.6380703054	22.101
118.8956597463	31.6372369721	21.655
118.8956597463	31.6364036387	21.756
118.8956597463	31.6355703054	19.624
118.8956597463	31.6347369721	16.338
118.8956597463	31.6339036387	14.655
118.8956597463	31.6330703054	14.892
118.8956597463	31.6322369721	15.578
118.8956597463	31.6314036387	16.184
118.8956597463	31.6305703054	18.263
118.8956597463	31.6297369721	18.131
118.8956597463	31.6289036387	18.578
118.8956597463	31.6280703054	19.524
118.8956597463	31.6272369721	19.369
118.8956597463	31.6264036387	19.869
118.8956597463	31.6255703054	20.578
118.8956597463	31.6247369721	22.34
118.8956597463	31.6239036387	23.762
118.8964930796	31.6480703054	16.578
118.8964930796	31.6472369721	17.524
118.8964930796	31.6464036387	16.315
118.8964930796	31.6455703054	14.369
118.8964930796	31.6447369721	15.393
118.8964930796	31.6439036387	18.393
118.8964930796	31.6430703054	20.631
118.8964930796	31.6422369721	22.054
118.8964930796	31.6414036387	20.762
118.8964930796	31.6405703054	19.839
118.8964930796	31.6397369721	19.131
118.8964930796	31.6389036387	17.946
118.8964930796	31.6380703054	20.257
118.8964930796	31.6372369721	19.678
118.8964930796	31.6364036387	18.601
118.8964930796	31.6355703054	16.31
118.8964930796	31.6347369721	14.44
118.8964930796	31.6339036387	13.207
118.8964930796	31.6330703054	14.631
118.8964930796	31.6322369721	15
118.8964930796	31.6314036387	16.631
118.8964930796	31.6305703054	17.578
118.8964930796	31.6297369721	17.946
118.8964930796	31.6289036387	18
118.8964930796	31.6280703054	18.578
118.8964930796	31.6272369721	19.524
118.8964930796	31.6264036387	19.946
118.8964930796	31.6255703054	20
118.8964930796	31.6247369721	21.393
118.8964930796	31.6239036387	23.34
118.8973264129	31.6480703054	16.054
118.8973264129	31.6472369721	16.34
118.8973264129	31.6464036387	15.839
118.8973264129	31.6455703054	14.315
118.8973264129	31.6447369721	14.816
118.8973264129	31.6439036387	18.5
118.8973264129	31.6430703054	21.399
118.8973264129	31.6422369721	23.268
118.8973264129	31.6414036387	20.083
118.8973264129	31.6405703054	19.054
118.8973264129	31.6397369721	18.762
118.8973264129	31.6389036387	17.315
118.8973264129	31.6380703054	17.102
118.8973264129	31.6372369721	17.363
118.8973264129	31.6364036387	16.601
118.8973264129	31.6355703054	13.63
118.8973264129	31.6347369721	12.66
118.8973264129	31.6339036387	13.399
118.8973264129	31.6330703054	14.739
118.8973264129	31.6322369721	15.476
118.8973264129	31.6314036387	16.977
118.8973264129	31.6305703054	17.054
118.8973264129	31.6297369721	17.816
118.8973264129	31.6289036387	18
118.8973264129	31.6280703054	18
118.8973264129	31.6272369721	18.816
118.8973264129	31.6264036387	19.578
118.8973264129	31.6255703054	19.946
118.8973264129	31.6247369721	20.816
118.8973264129	31.6239036387	22.631
118.8981597463	31.6480703054	15.946
118.8981597463	31.6472369721	14.893
118.8981597463	31.6464036387	14.708
118.8981597463	31.6455703054	14.131
118.8981597463	31.6447369721	14.578
118.8981597463	31.6439036387	18.311
118.8981597463	31.6430703054	22.863
118.8981597463	31.6422369721	25
118.8981597463	31.6414036387	21.214
118.8981597463	31.6405703054	19
118.8981597463	31.6397369721	18.131
118.8981597463	31.6389036387	16.946
118.8981597463	31.6380703054	15.077
118.8981597463	31.6372369721	15.286
118.8981597463	31.6364036387	14.363
118.8981597463	31.6355703054	13.445
118.8981597463	31.6347369721	14.345
118.8981597463	31.6339036387	14.923
118.8981597463	31.6330703054	15.238
118.8981597463	31.6322369721	16.685
118.8981597463	31.6314036387	17.578
118.8981597463	31.6305703054	17.131
118.8981597463	31.6297369721	17.578
118.8981597463	31.6289036387	17.946
118.8981597463	31.6280703054	18
118.8981597463	31.6272369721	18.34
118.8981597463	31.6264036387	18.417
118.8981597463	31.6255703054	19.47
118.8981597463	31.6247369721	21.238
118.8981597463	31.6239036387	22.739
118.8989930796	31.6480703054	15.423
118.8989930796	31.6472369721	13.946
118.8989930796	31.6464036387	13.708
118.8989930796	31.6455703054	13.946
118.8989930796	31.6447369721	14.238
118.8989930796	31.6439036387	16.739
118.8989930796	31.6430703054	21.234
118.8989930796	31.6422369721	24.572
118.8989930796	31.6414036387	21.047
118.8989930796	31.6405703054	17.916
118.8989930796	31.6397369721	17.179
118.8989930796	31.6389036387	15.494
118.8989930796	31.6380703054	13.969
118.8989930796	31.6372369721	13.47
118.8989930796	31.6364036387	12.023
118.8989930796	31.6355703054	13.577
118.8989930796	31.6347369721	15.393
118.8989930796	31.6339036387	15.369
118.8989930796	31.6330703054	16.107
118.8989930796	31.6322369721	16.869
118.8989930796	31.6314036387	17
118.8989930796	31.6305703054	17
118.8989930796	31.6297369721	17.238
118.8989930796	31.6289036387	17.631
118.8989930796	31.6280703054	17.946
118.8989930796	31.6272369721	16.946
118.8989930796	31.6264036387	17.184
118.8989930796	31.6255703054	18.209
118.8989930796	31.6247369721	21.679
118.8989930796	31.6239036387	22.892
118.8998264129	31.6480703054	15.607
118.8998264129	31.6472369721	13.369
118.8998264129	31.6464036387	12.762
118.8998264129	31.6455703054	13.286
118.8998264129	31.6447369721	14.47
118.8998264129	31.6439036387	17.393
118.8998264129	31.6430703054	19.631
118.8998264129	31.6422369721	21.971
118.8998264129	31.6414036387	18.338
118.8998264129	31.6405703054	15.785
118.8998264129	31.6397369721	14.601
118.8998264129	31.6389036387	13.023
118.8998264129	31.6380703054	12.946
118.8998264129	31.6372369721	12.422
118.8998264129	31.6364036387	11.476
118.8998264129	31.6355703054	13.501
118.8998264129	31.6347369721	14.816
118.8998264129	31.6339036387	15.578
118.8998264129	31.6330703054	16.524
118.8998264129	31.6322369721	16.946
118.8998264129	31.6314036387	17
118.8998264129	31.6305703054	17
118.8998264129	31.6297369721	18.054
118.8998264129	31.6289036387	17.238
118.8998264129	31.6280703054	17.34
118.8998264129	31.6272369721	16.023
118.8998264129	31.6264036387	17.577
118.8998264129	31.6255703054	17.184
118.8998264129	31.6247369721	19.787
118.8998264129	31.6239036387	21.572
