# Supplementary material for: Simulation Study on Coverage Path Planning of Autonomous Tasks in Hilly Farmland Based on Energy Consumption Model
Source: Hindawi journal article supplement (doi:10.1155/2020/4535734), 2020-08-30
Supplement: f1 [file 4535734.f1.zip › 4535734.f1/Algorithm-pathplanning-matlab/tk6(1).xyz]

118.8629166667	31.6487500000	158
118.8629166667	31.6479166667	141
118.8629166667	31.6470833333	121
118.8629166667	31.6462500000	106
118.8629166667	31.6454166667	110
118.8629166667	31.6445833333	113
118.8629166667	31.6437500000	98
118.8629166667	31.6429166667	84
118.8629166667	31.6420833333	70
118.8629166667	31.6412500000	60
118.8629166667	31.6404166667	57
118.8629166667	31.6395833333	55
118.8629166667	31.6387500000	51
118.8629166667	31.6379166667	46
118.8629166667	31.6370833333	44
118.8629166667	31.6362500000	44
118.8629166667	31.6354166667	41
118.8629166667	31.6345833333	40
118.8629166667	31.6337500000	40
118.8629166667	31.6329166667	40
118.8629166667	31.6320833333	36
118.8629166667	31.6312500000	34
118.8629166667	31.6304166667	32
118.8629166667	31.6295833333	34
118.8629166667	31.6287500000	36
118.8629166667	31.6279166667	40
118.8629166667	31.6270833333	40
118.8629166667	31.6262500000	37
118.8629166667	31.6254166667	31
118.8629166667	31.6245833333	31
118.8629166667	31.6237500000	31
118.8629166667	31.6229166667	31
118.8637500000	31.6487500000	145
118.8637500000	31.6479166667	121
118.8637500000	31.6470833333	107
118.8637500000	31.6462500000	98
118.8637500000	31.6454166667	90
118.8637500000	31.6445833333	89
118.8637500000	31.6437500000	83
118.8637500000	31.6429166667	78
118.8637500000	31.6420833333	66
118.8637500000	31.6412500000	61
118.8637500000	31.6404166667	56
118.8637500000	31.6395833333	53
118.8637500000	31.6387500000	48
118.8637500000	31.6379166667	47
118.8637500000	31.6370833333	45
118.8637500000	31.6362500000	43
118.8637500000	31.6354166667	40
118.8637500000	31.6345833333	39
118.8637500000	31.6337500000	36
118.8637500000	31.6329166667	36
118.8637500000	31.6320833333	36
118.8637500000	31.6312500000	35
118.8637500000	31.6304166667	32
118.8637500000	31.6295833333	30
118.8637500000	31.6287500000	33
118.8637500000	31.6279166667	36
118.8637500000	31.6270833333	37
118.8637500000	31.6262500000	39
118.8637500000	31.6254166667	36
118.8637500000	31.6245833333	31
118.8637500000	31.6237500000	31
118.8637500000	31.6229166667	31
118.8645833333	31.6487500000	158
118.8645833333	31.6479166667	134
118.8645833333	31.6470833333	130
118.8645833333	31.6462500000	114
118.8645833333	31.6454166667	92
118.8645833333	31.6445833333	86
118.8645833333	31.6437500000	81
118.8645833333	31.6429166667	73
118.8645833333	31.6420833333	65
118.8645833333	31.6412500000	65
118.8645833333	31.6404166667	60
118.8645833333	31.6395833333	55
118.8645833333	31.6387500000	51
118.8645833333	31.6379166667	50
118.8645833333	31.6370833333	48
118.8645833333	31.6362500000	46
118.8645833333	31.6354166667	43
118.8645833333	31.6345833333	40
118.8645833333	31.6337500000	37
118.8645833333	31.6329166667	35
118.8645833333	31.6320833333	35
118.8645833333	31.6312500000	35
118.8645833333	31.6304166667	35
118.8645833333	31.6295833333	33
118.8645833333	31.6287500000	32
118.8645833333	31.6279166667	31
118.8645833333	31.6270833333	33
118.8645833333	31.6262500000	35
118.8645833333	31.6254166667	37
118.8645833333	31.6245833333	31
118.8645833333	31.6237500000	31
118.8645833333	31.6229166667	31
118.8654166667	31.6487500000	177
118.8654166667	31.6479166667	158
118.8654166667	31.6470833333	154
118.8654166667	31.6462500000	125
118.8654166667	31.6454166667	103
118.8654166667	31.6445833333	96
118.8654166667	31.6437500000	84
118.8654166667	31.6429166667	74
118.8654166667	31.6420833333	65
118.8654166667	31.6412500000	64
118.8654166667	31.6404166667	61
118.8654166667	31.6395833333	57
118.8654166667	31.6387500000	55
118.8654166667	31.6379166667	50
118.8654166667	31.6370833333	47
118.8654166667	31.6362500000	45
118.8654166667	31.6354166667	45
118.8654166667	31.6345833333	41
118.8654166667	31.6337500000	37
118.8654166667	31.6329166667	35
118.8654166667	31.6320833333	34
118.8654166667	31.6312500000	33
118.8654166667	31.6304166667	32
118.8654166667	31.6295833333	33
118.8654166667	31.6287500000	32
118.8654166667	31.6279166667	30
118.8654166667	31.6270833333	29
118.8654166667	31.6262500000	32
118.8654166667	31.6254166667	35
118.8654166667	31.6245833333	39
118.8654166667	31.6237500000	31
118.8654166667	31.6229166667	31
118.8662500000	31.6487500000	184
118.8662500000	31.6479166667	182
118.8662500000	31.6470833333	161
118.8662500000	31.6462500000	131
118.8662500000	31.6454166667	123
118.8662500000	31.6445833333	106
118.8662500000	31.6437500000	86
118.8662500000	31.6429166667	72
118.8662500000	31.6420833333	63
118.8662500000	31.6412500000	60
118.8662500000	31.6404166667	60
118.8662500000	31.6395833333	55
118.8662500000	31.6387500000	53
118.8662500000	31.6379166667	50
118.8662500000	31.6370833333	47
118.8662500000	31.6362500000	42
118.8662500000	31.6354166667	41
118.8662500000	31.6345833333	38
118.8662500000	31.6337500000	37
118.8662500000	31.6329166667	36
118.8662500000	31.6320833333	34
118.8662500000	31.6312500000	32
118.8662500000	31.6304166667	31
118.8662500000	31.6295833333	30
118.8662500000	31.6287500000	29
118.8662500000	31.6279166667	27
118.8662500000	31.6270833333	26
118.8662500000	31.6262500000	27
118.8662500000	31.6254166667	32
118.8662500000	31.6245833333	37
118.8662500000	31.6237500000	31
118.8662500000	31.6229166667	31
118.8670833333	31.6487500000	203
118.8670833333	31.6479166667	201
118.8670833333	31.6470833333	170
118.8670833333	31.6462500000	152
118.8670833333	31.6454166667	147
118.8670833333	31.6445833333	114
118.8670833333	31.6437500000	87
118.8670833333	31.6429166667	72
118.8670833333	31.6420833333	65
118.8670833333	31.6412500000	58
118.8670833333	31.6404166667	51
118.8670833333	31.6395833333	51
118.8670833333	31.6387500000	50
118.8670833333	31.6379166667	48
118.8670833333	31.6370833333	48
118.8670833333	31.6362500000	44
118.8670833333	31.6354166667	41
118.8670833333	31.6345833333	41
118.8670833333	31.6337500000	43
118.8670833333	31.6329166667	41
118.8670833333	31.6320833333	37
118.8670833333	31.6312500000	33
118.8670833333	31.6304166667	32
118.8670833333	31.6295833333	31
118.8670833333	31.6287500000	29
118.8670833333	31.6279166667	27
118.8670833333	31.6270833333	26
118.8670833333	31.6262500000	25
118.8670833333	31.6254166667	30
118.8670833333	31.6245833333	33
118.8670833333	31.6237500000	31
118.8670833333	31.6229166667	31
118.8679166667	31.6487500000	228
118.8679166667	31.6479166667	227
118.8679166667	31.6470833333	193
118.8679166667	31.6462500000	183
118.8679166667	31.6454166667	163
118.8679166667	31.6445833333	121
118.8679166667	31.6437500000	91
118.8679166667	31.6429166667	74
118.8679166667	31.6420833333	65
118.8679166667	31.6412500000	59
118.8679166667	31.6404166667	52
118.8679166667	31.6395833333	48
118.8679166667	31.6387500000	46
118.8679166667	31.6379166667	47
118.8679166667	31.6370833333	46
118.8679166667	31.6362500000	45
118.8679166667	31.6354166667	44
118.8679166667	31.6345833333	47
118.8679166667	31.6337500000	45
118.8679166667	31.6329166667	40
118.8679166667	31.6320833333	37
118.8679166667	31.6312500000	35
118.8679166667	31.6304166667	33
118.8679166667	31.6295833333	31
118.8679166667	31.6287500000	30
118.8679166667	31.6279166667	28
118.8679166667	31.6270833333	27
118.8679166667	31.6262500000	24
118.8679166667	31.6254166667	26
118.8679166667	31.6245833333	28
118.8679166667	31.6237500000	24
118.8679166667	31.6229166667	25
118.8687500000	31.6487500000	247
118.8687500000	31.6479166667	243
118.8687500000	31.6470833333	213
118.8687500000	31.6462500000	189
118.8687500000	31.6454166667	151
118.8687500000	31.6445833333	114
118.8687500000	31.6437500000	92
118.8687500000	31.6429166667	82
118.8687500000	31.6420833333	67
118.8687500000	31.6412500000	58
118.8687500000	31.6404166667	57
118.8687500000	31.6395833333	50
118.8687500000	31.6387500000	47
118.8687500000	31.6379166667	48
118.8687500000	31.6370833333	44
118.8687500000	31.6362500000	43
118.8687500000	31.6354166667	44
118.8687500000	31.6345833333	42
118.8687500000	31.6337500000	40
118.8687500000	31.6329166667	37
118.8687500000	31.6320833333	34
118.8687500000	31.6312500000	34
118.8687500000	31.6304166667	32
118.8687500000	31.6295833333	30
118.8687500000	31.6287500000	29
118.8687500000	31.6279166667	29
118.8687500000	31.6270833333	26
118.8687500000	31.6262500000	24
118.8687500000	31.6254166667	24
118.8687500000	31.6245833333	23
118.8687500000	31.6237500000	23
118.8687500000	31.6229166667	23
118.8695833333	31.6487500000	256
118.8695833333	31.6479166667	238
118.8695833333	31.6470833333	198
118.8695833333	31.6462500000	155
118.8695833333	31.6454166667	126
118.8695833333	31.6445833333	108
118.8695833333	31.6437500000	90
118.8695833333	31.6429166667	77
118.8695833333	31.6420833333	66
118.8695833333	31.6412500000	62
118.8695833333	31.6404166667	61
118.8695833333	31.6395833333	56
118.8695833333	31.6387500000	50
118.8695833333	31.6379166667	45
118.8695833333	31.6370833333	40
118.8695833333	31.6362500000	38
118.8695833333	31.6354166667	40
118.8695833333	31.6345833333	43
118.8695833333	31.6337500000	39
118.8695833333	31.6329166667	37
118.8695833333	31.6320833333	36
118.8695833333	31.6312500000	34
118.8695833333	31.6304166667	35
118.8695833333	31.6295833333	34
118.8695833333	31.6287500000	31
118.8695833333	31.6279166667	28
118.8695833333	31.6270833333	26
118.8695833333	31.6262500000	25
118.8695833333	31.6254166667	22
118.8695833333	31.6245833333	22
118.8695833333	31.6237500000	23
118.8695833333	31.6229166667	25
118.8704166667	31.6487500000	261
118.8704166667	31.6479166667	239
118.8704166667	31.6470833333	201
118.8704166667	31.6462500000	156
118.8704166667	31.6454166667	121
118.8704166667	31.6445833333	100
118.8704166667	31.6437500000	88
118.8704166667	31.6429166667	79
118.8704166667	31.6420833333	68
118.8704166667	31.6412500000	66
118.8704166667	31.6404166667	62
118.8704166667	31.6395833333	57
118.8704166667	31.6387500000	52
118.8704166667	31.6379166667	44
118.8704166667	31.6370833333	39
118.8704166667	31.6362500000	39
118.8704166667	31.6354166667	37
118.8704166667	31.6345833333	37
118.8704166667	31.6337500000	37
118.8704166667	31.6329166667	36
118.8704166667	31.6320833333	34
118.8704166667	31.6312500000	33
118.8704166667	31.6304166667	34
118.8704166667	31.6295833333	34
118.8704166667	31.6287500000	34
118.8704166667	31.6279166667	29
118.8704166667	31.6270833333	27
118.8704166667	31.6262500000	24
118.8704166667	31.6254166667	22
118.8704166667	31.6245833333	22
118.8704166667	31.6237500000	23
118.8704166667	31.6229166667	25
118.8712500000	31.6487500000	236
118.8712500000	31.6479166667	220
118.8712500000	31.6470833333	201
118.8712500000	31.6462500000	160
118.8712500000	31.6454166667	128
118.8712500000	31.6445833333	114
118.8712500000	31.6437500000	97
118.8712500000	31.6429166667	88
118.8712500000	31.6420833333	79
118.8712500000	31.6412500000	64
118.8712500000	31.6404166667	59
118.8712500000	31.6395833333	56
118.8712500000	31.6387500000	52
118.8712500000	31.6379166667	45
118.8712500000	31.6370833333	41
118.8712500000	31.6362500000	37
118.8712500000	31.6354166667	36
118.8712500000	31.6345833333	35
118.8712500000	31.6337500000	34
118.8712500000	31.6329166667	35
118.8712500000	31.6320833333	37
118.8712500000	31.6312500000	34
118.8712500000	31.6304166667	31
118.8712500000	31.6295833333	29
118.8712500000	31.6287500000	31
118.8712500000	31.6279166667	31
118.8712500000	31.6270833333	30
118.8712500000	31.6262500000	24
118.8712500000	31.6254166667	23
118.8712500000	31.6245833333	22
118.8712500000	31.6237500000	23
118.8712500000	31.6229166667	25
118.8720833333	31.6487500000	205
118.8720833333	31.6479166667	201
118.8720833333	31.6470833333	204
118.8720833333	31.6462500000	186
118.8720833333	31.6454166667	159
118.8720833333	31.6445833333	131
118.8720833333	31.6437500000	110
118.8720833333	31.6429166667	115
118.8720833333	31.6420833333	98
118.8720833333	31.6412500000	71
118.8720833333	31.6404166667	56
118.8720833333	31.6395833333	52
118.8720833333	31.6387500000	49
118.8720833333	31.6379166667	43
118.8720833333	31.6370833333	42
118.8720833333	31.6362500000	40
118.8720833333	31.6354166667	35
118.8720833333	31.6345833333	34
118.8720833333	31.6337500000	33
118.8720833333	31.6329166667	32
118.8720833333	31.6320833333	32
118.8720833333	31.6312500000	31
118.8720833333	31.6304166667	31
118.8720833333	31.6295833333	28
118.8720833333	31.6287500000	29
118.8720833333	31.6279166667	28
118.8720833333	31.6270833333	29
118.8720833333	31.6262500000	26
118.8720833333	31.6254166667	23
118.8720833333	31.6245833333	21
118.8720833333	31.6237500000	23
118.8720833333	31.6229166667	24
118.8729166667	31.6487500000	179
118.8729166667	31.6479166667	175
118.8729166667	31.6470833333	200
118.8729166667	31.6462500000	208
118.8729166667	31.6454166667	178
118.8729166667	31.6445833333	141
118.8729166667	31.6437500000	133
118.8729166667	31.6429166667	136
118.8729166667	31.6420833333	118
118.8729166667	31.6412500000	84
118.8729166667	31.6404166667	57
118.8729166667	31.6395833333	47
118.8729166667	31.6387500000	47
118.8729166667	31.6379166667	43
118.8729166667	31.6370833333	41
118.8729166667	31.6362500000	42
118.8729166667	31.6354166667	38
118.8729166667	31.6345833333	36
118.8729166667	31.6337500000	34
118.8729166667	31.6329166667	31
118.8729166667	31.6320833333	29
118.8729166667	31.6312500000	29
118.8729166667	31.6304166667	30
118.8729166667	31.6295833333	31
118.8729166667	31.6287500000	29
118.8729166667	31.6279166667	26
118.8729166667	31.6270833333	25
118.8729166667	31.6262500000	25
118.8729166667	31.6254166667	24
118.8729166667	31.6245833333	20
118.8729166667	31.6237500000	22
118.8729166667	31.6229166667	24
118.8737500000	31.6487500000	137
118.8737500000	31.6479166667	147
118.8737500000	31.6470833333	190
118.8737500000	31.6462500000	211
118.8737500000	31.6454166667	193
118.8737500000	31.6445833333	165
118.8737500000	31.6437500000	169
118.8737500000	31.6429166667	156
118.8737500000	31.6420833333	120
118.8737500000	31.6412500000	87
118.8737500000	31.6404166667	59
118.8737500000	31.6395833333	48
118.8737500000	31.6387500000	44
118.8737500000	31.6379166667	39
118.8737500000	31.6370833333	36
118.8737500000	31.6362500000	40
118.8737500000	31.6354166667	40
118.8737500000	31.6345833333	38
118.8737500000	31.6337500000	35
118.8737500000	31.6329166667	33
118.8737500000	31.6320833333	29
118.8737500000	31.6312500000	28
118.8737500000	31.6304166667	26
118.8737500000	31.6295833333	29
118.8737500000	31.6287500000	30
118.8737500000	31.6279166667	28
118.8737500000	31.6270833333	26
118.8737500000	31.6262500000	23
118.8737500000	31.6254166667	24
118.8737500000	31.6245833333	20
118.8737500000	31.6237500000	22
118.8737500000	31.6229166667	25
118.8745833333	31.6487500000	113
118.8745833333	31.6479166667	135
118.8745833333	31.6470833333	172
118.8745833333	31.6462500000	200
118.8745833333	31.6454166667	187
118.8745833333	31.6445833333	189
118.8745833333	31.6437500000	180
118.8745833333	31.6429166667	151
118.8745833333	31.6420833333	120
118.8745833333	31.6412500000	83
118.8745833333	31.6404166667	59
118.8745833333	31.6395833333	52
118.8745833333	31.6387500000	43
118.8745833333	31.6379166667	38
118.8745833333	31.6370833333	33
118.8745833333	31.6362500000	35
118.8745833333	31.6354166667	37
118.8745833333	31.6345833333	35
118.8745833333	31.6337500000	33
118.8745833333	31.6329166667	33
118.8745833333	31.6320833333	31
118.8745833333	31.6312500000	28
118.8745833333	31.6304166667	27
118.8745833333	31.6295833333	26
118.8745833333	31.6287500000	27
118.8745833333	31.6279166667	28
118.8745833333	31.6270833333	26
118.8745833333	31.6262500000	23
118.8745833333	31.6254166667	22
118.8745833333	31.6245833333	20
118.8745833333	31.6237500000	23
118.8745833333	31.6229166667	27
118.8754166667	31.6487500000	101
118.8754166667	31.6479166667	125
118.8754166667	31.6470833333	159
118.8754166667	31.6462500000	175
118.8754166667	31.6454166667	172
118.8754166667	31.6445833333	193
118.8754166667	31.6437500000	177
118.8754166667	31.6429166667	149
118.8754166667	31.6420833333	119
118.8754166667	31.6412500000	83
118.8754166667	31.6404166667	59
118.8754166667	31.6395833333	47
118.8754166667	31.6387500000	39
118.8754166667	31.6379166667	36
118.8754166667	31.6370833333	35
118.8754166667	31.6362500000	32
118.8754166667	31.6354166667	32
118.8754166667	31.6345833333	33
118.8754166667	31.6337500000	33
118.8754166667	31.6329166667	31
118.8754166667	31.6320833333	30
118.8754166667	31.6312500000	28
118.8754166667	31.6304166667	26
118.8754166667	31.6295833333	26
118.8754166667	31.6287500000	26
118.8754166667	31.6279166667	26
118.8754166667	31.6270833333	23
118.8754166667	31.6262500000	22
118.8754166667	31.6254166667	20
118.8754166667	31.6245833333	20
118.8754166667	31.6237500000	24
118.8754166667	31.6229166667	25
118.8762500000	31.6487500000	106
118.8762500000	31.6479166667	124
118.8762500000	31.6470833333	143
118.8762500000	31.6462500000	143
118.8762500000	31.6454166667	160
118.8762500000	31.6445833333	167
118.8762500000	31.6437500000	153
118.8762500000	31.6429166667	129
118.8762500000	31.6420833333	99
118.8762500000	31.6412500000	75
118.8762500000	31.6404166667	55
118.8762500000	31.6395833333	43
118.8762500000	31.6387500000	37
118.8762500000	31.6379166667	35
118.8762500000	31.6370833333	35
118.8762500000	31.6362500000	35
118.8762500000	31.6354166667	30
118.8762500000	31.6345833333	31
118.8762500000	31.6337500000	34
118.8762500000	31.6329166667	31
118.8762500000	31.6320833333	29
118.8762500000	31.6312500000	27
118.8762500000	31.6304166667	26
118.8762500000	31.6295833333	25
118.8762500000	31.6287500000	24
118.8762500000	31.6279166667	27
118.8762500000	31.6270833333	23
118.8762500000	31.6262500000	22
118.8762500000	31.6254166667	20
118.8762500000	31.6245833333	21
118.8762500000	31.6237500000	26
118.8762500000	31.6229166667	27
118.8770833333	31.6487500000	97
118.8770833333	31.6479166667	109
118.8770833333	31.6470833333	119
118.8770833333	31.6462500000	113
118.8770833333	31.6454166667	137
118.8770833333	31.6445833333	135
118.8770833333	31.6437500000	117
118.8770833333	31.6429166667	97
118.8770833333	31.6420833333	77
118.8770833333	31.6412500000	59
118.8770833333	31.6404166667	47
118.8770833333	31.6395833333	39
118.8770833333	31.6387500000	36
118.8770833333	31.6379166667	33
118.8770833333	31.6370833333	33
118.8770833333	31.6362500000	33
118.8770833333	31.6354166667	31
118.8770833333	31.6345833333	30
118.8770833333	31.6337500000	32
118.8770833333	31.6329166667	33
118.8770833333	31.6320833333	32
118.8770833333	31.6312500000	28
118.8770833333	31.6304166667	24
118.8770833333	31.6295833333	24
118.8770833333	31.6287500000	21
118.8770833333	31.6279166667	24
118.8770833333	31.6270833333	21
118.8770833333	31.6262500000	20
118.8770833333	31.6254166667	20
118.8770833333	31.6245833333	23
118.8770833333	31.6237500000	26
118.8770833333	31.6229166667	28
118.8779166667	31.6487500000	83
118.8779166667	31.6479166667	92
118.8779166667	31.6470833333	94
118.8779166667	31.6462500000	93
118.8779166667	31.6454166667	109
118.8779166667	31.6445833333	105
118.8779166667	31.6437500000	86
118.8779166667	31.6429166667	72
118.8779166667	31.6420833333	63
118.8779166667	31.6412500000	49
118.8779166667	31.6404166667	40
118.8779166667	31.6395833333	34
118.8779166667	31.6387500000	32
118.8779166667	31.6379166667	31
118.8779166667	31.6370833333	32
118.8779166667	31.6362500000	32
118.8779166667	31.6354166667	32
118.8779166667	31.6345833333	30
118.8779166667	31.6337500000	30
118.8779166667	31.6329166667	31
118.8779166667	31.6320833333	30
118.8779166667	31.6312500000	25
118.8779166667	31.6304166667	24
118.8779166667	31.6295833333	24
118.8779166667	31.6287500000	23
118.8779166667	31.6279166667	21
118.8779166667	31.6270833333	20
118.8779166667	31.6262500000	21
118.8779166667	31.6254166667	20
118.8779166667	31.6245833333	24
118.8779166667	31.6237500000	27
118.8779166667	31.6229166667	28
118.8787500000	31.6487500000	69
118.8787500000	31.6479166667	72
118.8787500000	31.6470833333	70
118.8787500000	31.6462500000	72
118.8787500000	31.6454166667	84
118.8787500000	31.6445833333	76
118.8787500000	31.6437500000	66
118.8787500000	31.6429166667	56
118.8787500000	31.6420833333	47
118.8787500000	31.6412500000	40
118.8787500000	31.6404166667	36
118.8787500000	31.6395833333	33
118.8787500000	31.6387500000	30
118.8787500000	31.6379166667	30
118.8787500000	31.6370833333	30
118.8787500000	31.6362500000	31
118.8787500000	31.6354166667	32
118.8787500000	31.6345833333	31
118.8787500000	31.6337500000	29
118.8787500000	31.6329166667	27
118.8787500000	31.6320833333	29
118.8787500000	31.6312500000	28
118.8787500000	31.6304166667	27
118.8787500000	31.6295833333	24
118.8787500000	31.6287500000	22
118.8787500000	31.6279166667	21
118.8787500000	31.6270833333	19
118.8787500000	31.6262500000	21
118.8787500000	31.6254166667	22
118.8787500000	31.6245833333	25
118.8787500000	31.6237500000	27
118.8787500000	31.6229166667	28
118.8795833333	31.6487500000	58
118.8795833333	31.6479166667	57
118.8795833333	31.6470833333	53
118.8795833333	31.6462500000	58
118.8795833333	31.6454166667	64
118.8795833333	31.6445833333	55
118.8795833333	31.6437500000	49
118.8795833333	31.6429166667	42
118.8795833333	31.6420833333	38
118.8795833333	31.6412500000	33
118.8795833333	31.6404166667	32
118.8795833333	31.6395833333	30
118.8795833333	31.6387500000	28
118.8795833333	31.6379166667	29
118.8795833333	31.6370833333	30
118.8795833333	31.6362500000	29
118.8795833333	31.6354166667	32
118.8795833333	31.6345833333	31
118.8795833333	31.6337500000	29
118.8795833333	31.6329166667	27
118.8795833333	31.6320833333	26
118.8795833333	31.6312500000	26
118.8795833333	31.6304166667	29
118.8795833333	31.6295833333	24
118.8795833333	31.6287500000	21
118.8795833333	31.6279166667	20
118.8795833333	31.6270833333	21
118.8795833333	31.6262500000	21
118.8795833333	31.6254166667	22
118.8795833333	31.6245833333	25
118.8795833333	31.6237500000	26
118.8795833333	31.6229166667	24
118.8804166667	31.6487500000	42
118.8804166667	31.6479166667	42
118.8804166667	31.6470833333	42
118.8804166667	31.6462500000	48
118.8804166667	31.6454166667	50
118.8804166667	31.6445833333	43
118.8804166667	31.6437500000	40
118.8804166667	31.6429166667	39
118.8804166667	31.6420833333	36
118.8804166667	31.6412500000	30
118.8804166667	31.6404166667	29
118.8804166667	31.6395833333	29
118.8804166667	31.6387500000	28
118.8804166667	31.6379166667	27
118.8804166667	31.6370833333	29
118.8804166667	31.6362500000	28
118.8804166667	31.6354166667	29
118.8804166667	31.6345833333	29
118.8804166667	31.6337500000	31
118.8804166667	31.6329166667	29
118.8804166667	31.6320833333	27
118.8804166667	31.6312500000	24
118.8804166667	31.6304166667	26
118.8804166667	31.6295833333	25
118.8804166667	31.6287500000	22
118.8804166667	31.6279166667	21
118.8804166667	31.6270833333	21
118.8804166667	31.6262500000	21
118.8804166667	31.6254166667	19
118.8804166667	31.6245833333	21
118.8804166667	31.6237500000	23
118.8804166667	31.6229166667	22
118.8812500000	31.6487500000	35
118.8812500000	31.6479166667	35
118.8812500000	31.6470833333	38
118.8812500000	31.6462500000	43
118.8812500000	31.6454166667	41
118.8812500000	31.6445833333	36
118.8812500000	31.6437500000	34
118.8812500000	31.6429166667	32
118.8812500000	31.6420833333	32
118.8812500000	31.6412500000	30
118.8812500000	31.6404166667	27
118.8812500000	31.6395833333	27
118.8812500000	31.6387500000	28
118.8812500000	31.6379166667	28
118.8812500000	31.6370833333	29
118.8812500000	31.6362500000	26
118.8812500000	31.6354166667	26
118.8812500000	31.6345833333	32
118.8812500000	31.6337500000	30
118.8812500000	31.6329166667	27
118.8812500000	31.6320833333	27
118.8812500000	31.6312500000	25
118.8812500000	31.6304166667	25
118.8812500000	31.6295833333	25
118.8812500000	31.6287500000	22
118.8812500000	31.6279166667	20
118.8812500000	31.6270833333	19
118.8812500000	31.6262500000	19
118.8812500000	31.6254166667	18
118.8812500000	31.6245833333	20
118.8812500000	31.6237500000	24
118.8812500000	31.6229166667	23
118.8820833333	31.6487500000	30
118.8820833333	31.6479166667	31
118.8820833333	31.6470833333	31
118.8820833333	31.6462500000	37
118.8820833333	31.6454166667	35
118.8820833333	31.6445833333	33
118.8820833333	31.6437500000	30
118.8820833333	31.6429166667	28
118.8820833333	31.6420833333	32
118.8820833333	31.6412500000	30
118.8820833333	31.6404166667	28
118.8820833333	31.6395833333	26
118.8820833333	31.6387500000	26
118.8820833333	31.6379166667	26
118.8820833333	31.6370833333	28
118.8820833333	31.6362500000	27
118.8820833333	31.6354166667	24
118.8820833333	31.6345833333	29
118.8820833333	31.6337500000	29
118.8820833333	31.6329166667	25
118.8820833333	31.6320833333	25
118.8820833333	31.6312500000	24
118.8820833333	31.6304166667	22
118.8820833333	31.6295833333	22
118.8820833333	31.6287500000	22
118.8820833333	31.6279166667	20
118.8820833333	31.6270833333	18
118.8820833333	31.6262500000	16
118.8820833333	31.6254166667	17
118.8820833333	31.6245833333	20
118.8820833333	31.6237500000	23
118.8820833333	31.6229166667	22
118.8829166667	31.6487500000	31
118.8829166667	31.6479166667	28
118.8829166667	31.6470833333	27
118.8829166667	31.6462500000	30
118.8829166667	31.6454166667	30
118.8829166667	31.6445833333	29
118.8829166667	31.6437500000	29
118.8829166667	31.6429166667	28
118.8829166667	31.6420833333	28
118.8829166667	31.6412500000	31
118.8829166667	31.6404166667	28
118.8829166667	31.6395833333	26
118.8829166667	31.6387500000	25
118.8829166667	31.6379166667	24
118.8829166667	31.6370833333	26
118.8829166667	31.6362500000	27
118.8829166667	31.6354166667	24
118.8829166667	31.6345833333	26
118.8829166667	31.6337500000	27
118.8829166667	31.6329166667	27
118.8829166667	31.6320833333	26
118.8829166667	31.6312500000	25
118.8829166667	31.6304166667	22
118.8829166667	31.6295833333	21
118.8829166667	31.6287500000	21
118.8829166667	31.6279166667	19
118.8829166667	31.6270833333	17
118.8829166667	31.6262500000	17
118.8829166667	31.6254166667	18
118.8829166667	31.6245833333	21
118.8829166667	31.6237500000	20
118.8829166667	31.6229166667	20
118.8837500000	31.6487500000	33
118.8837500000	31.6479166667	30
118.8837500000	31.6470833333	25
118.8837500000	31.6462500000	26
118.8837500000	31.6454166667	26
118.8837500000	31.6445833333	26
118.8837500000	31.6437500000	25
118.8837500000	31.6429166667	26
118.8837500000	31.6420833333	27
118.8837500000	31.6412500000	31
118.8837500000	31.6404166667	29
118.8837500000	31.6395833333	26
118.8837500000	31.6387500000	23
118.8837500000	31.6379166667	23
118.8837500000	31.6370833333	26
118.8837500000	31.6362500000	25
118.8837500000	31.6354166667	23
118.8837500000	31.6345833333	26
118.8837500000	31.6337500000	27
118.8837500000	31.6329166667	26
118.8837500000	31.6320833333	26
118.8837500000	31.6312500000	23
118.8837500000	31.6304166667	19
118.8837500000	31.6295833333	19
118.8837500000	31.6287500000	20
118.8837500000	31.6279166667	19
118.8837500000	31.6270833333	17
118.8837500000	31.6262500000	18
118.8837500000	31.6254166667	18
118.8837500000	31.6245833333	20
118.8837500000	31.6237500000	20
118.8837500000	31.6229166667	19
118.8845833333	31.6487500000	31
118.8845833333	31.6479166667	28
118.8845833333	31.6470833333	24
118.8845833333	31.6462500000	24
118.8845833333	31.6454166667	24
118.8845833333	31.6445833333	22
118.8845833333	31.6437500000	24
118.8845833333	31.6429166667	26
118.8845833333	31.6420833333	28
118.8845833333	31.6412500000	30
118.8845833333	31.6404166667	28
118.8845833333	31.6395833333	24
118.8845833333	31.6387500000	22
118.8845833333	31.6379166667	22
118.8845833333	31.6370833333	23
118.8845833333	31.6362500000	21
118.8845833333	31.6354166667	23
118.8845833333	31.6345833333	26
118.8845833333	31.6337500000	25
118.8845833333	31.6329166667	26
118.8845833333	31.6320833333	26
118.8845833333	31.6312500000	20
118.8845833333	31.6304166667	18
118.8845833333	31.6295833333	19
118.8845833333	31.6287500000	19
118.8845833333	31.6279166667	19
118.8845833333	31.6270833333	17
118.8845833333	31.6262500000	18
118.8845833333	31.6254166667	20
118.8845833333	31.6245833333	20
118.8845833333	31.6237500000	19
118.8845833333	31.6229166667	18
118.8854166667	31.6487500000	29
118.8854166667	31.6479166667	27
118.8854166667	31.6470833333	24
118.8854166667	31.6462500000	22
118.8854166667	31.6454166667	23
118.8854166667	31.6445833333	24
118.8854166667	31.6437500000	27
118.8854166667	31.6429166667	29
118.8854166667	31.6420833333	28
118.8854166667	31.6412500000	28
118.8854166667	31.6404166667	28
118.8854166667	31.6395833333	25
118.8854166667	31.6387500000	24
118.8854166667	31.6379166667	23
118.8854166667	31.6370833333	21
118.8854166667	31.6362500000	20
118.8854166667	31.6354166667	25
118.8854166667	31.6345833333	22
118.8854166667	31.6337500000	22
118.8854166667	31.6329166667	24
118.8854166667	31.6320833333	23
118.8854166667	31.6312500000	19
118.8854166667	31.6304166667	18
118.8854166667	31.6295833333	19
118.8854166667	31.6287500000	18
118.8854166667	31.6279166667	18
118.8854166667	31.6270833333	17
118.8854166667	31.6262500000	18
118.8854166667	31.6254166667	20
118.8854166667	31.6245833333	20
118.8854166667	31.6237500000	18
118.8854166667	31.6229166667	18
118.8862500000	31.6487500000	28
118.8862500000	31.6479166667	25
118.8862500000	31.6470833333	23
118.8862500000	31.6462500000	23
118.8862500000	31.6454166667	24
118.8862500000	31.6445833333	27
118.8862500000	31.6437500000	32
118.8862500000	31.6429166667	30
118.8862500000	31.6420833333	28
118.8862500000	31.6412500000	26
118.8862500000	31.6404166667	27
118.8862500000	31.6395833333	28
118.8862500000	31.6387500000	25
118.8862500000	31.6379166667	23
118.8862500000	31.6370833333	20
118.8862500000	31.6362500000	20
118.8862500000	31.6354166667	25
118.8862500000	31.6345833333	24
118.8862500000	31.6337500000	22
118.8862500000	31.6329166667	21
118.8862500000	31.6320833333	20
118.8862500000	31.6312500000	18
118.8862500000	31.6304166667	19
118.8862500000	31.6295833333	18
118.8862500000	31.6287500000	17
118.8862500000	31.6279166667	18
118.8862500000	31.6270833333	17
118.8862500000	31.6262500000	16
118.8862500000	31.6254166667	19
118.8862500000	31.6245833333	18
118.8862500000	31.6237500000	17
118.8862500000	31.6229166667	18
118.8870833333	31.6487500000	30
118.8870833333	31.6479166667	25
118.8870833333	31.6470833333	22
118.8870833333	31.6462500000	23
118.8870833333	31.6454166667	23
118.8870833333	31.6445833333	27
118.8870833333	31.6437500000	30
118.8870833333	31.6429166667	29
118.8870833333	31.6420833333	29
118.8870833333	31.6412500000	25
118.8870833333	31.6404166667	24
118.8870833333	31.6395833333	28
118.8870833333	31.6387500000	26
118.8870833333	31.6379166667	24
118.8870833333	31.6370833333	20
118.8870833333	31.6362500000	20
118.8870833333	31.6354166667	22
118.8870833333	31.6345833333	26
118.8870833333	31.6337500000	21
118.8870833333	31.6329166667	19
118.8870833333	31.6320833333	18
118.8870833333	31.6312500000	18
118.8870833333	31.6304166667	18
118.8870833333	31.6295833333	18
118.8870833333	31.6287500000	17
118.8870833333	31.6279166667	17
118.8870833333	31.6270833333	15
118.8870833333	31.6262500000	16
118.8870833333	31.6254166667	18
118.8870833333	31.6245833333	16
118.8870833333	31.6237500000	16
118.8870833333	31.6229166667	17
118.8879166667	31.6487500000	27
118.8879166667	31.6479166667	23
118.8879166667	31.6470833333	23
118.8879166667	31.6462500000	21
118.8879166667	31.6454166667	21
118.8879166667	31.6445833333	26
118.8879166667	31.6437500000	30
118.8879166667	31.6429166667	30
118.8879166667	31.6420833333	28
118.8879166667	31.6412500000	25
118.8879166667	31.6404166667	24
118.8879166667	31.6395833333	23
118.8879166667	31.6387500000	24
118.8879166667	31.6379166667	23
118.8879166667	31.6370833333	20
118.8879166667	31.6362500000	19
118.8879166667	31.6354166667	19
118.8879166667	31.6345833333	21
118.8879166667	31.6337500000	20
118.8879166667	31.6329166667	17
118.8879166667	31.6320833333	17
118.8879166667	31.6312500000	17
118.8879166667	31.6304166667	18
118.8879166667	31.6295833333	17
118.8879166667	31.6287500000	17
118.8879166667	31.6279166667	17
118.8879166667	31.6270833333	17
118.8879166667	31.6262500000	16
118.8879166667	31.6254166667	17
118.8879166667	31.6245833333	19
118.8879166667	31.6237500000	19
118.8879166667	31.6229166667	17
118.8887500000	31.6487500000	25
118.8887500000	31.6479166667	24
118.8887500000	31.6470833333	22
118.8887500000	31.6462500000	20
118.8887500000	31.6454166667	20
118.8887500000	31.6445833333	25
118.8887500000	31.6437500000	27
118.8887500000	31.6429166667	28
118.8887500000	31.6420833333	28
118.8887500000	31.6412500000	27
118.8887500000	31.6404166667	25
118.8887500000	31.6395833333	24
118.8887500000	31.6387500000	24
118.8887500000	31.6379166667	20
118.8887500000	31.6370833333	19
118.8887500000	31.6362500000	17
118.8887500000	31.6354166667	17
118.8887500000	31.6345833333	16
118.8887500000	31.6337500000	16
118.8887500000	31.6329166667	16
118.8887500000	31.6320833333	15
118.8887500000	31.6312500000	15
118.8887500000	31.6304166667	17
118.8887500000	31.6295833333	16
118.8887500000	31.6287500000	17
118.8887500000	31.6279166667	17
118.8887500000	31.6270833333	17
118.8887500000	31.6262500000	15
118.8887500000	31.6254166667	18
118.8887500000	31.6245833333	23
118.8887500000	31.6237500000	22
118.8887500000	31.6229166667	17
118.8895833333	31.6487500000	24
118.8895833333	31.6479166667	22
118.8895833333	31.6470833333	21
118.8895833333	31.6462500000	19
118.8895833333	31.6454166667	19
118.8895833333	31.6445833333	23
118.8895833333	31.6437500000	24
118.8895833333	31.6429166667	25
118.8895833333	31.6420833333	24
118.8895833333	31.6412500000	27
118.8895833333	31.6404166667	26
118.8895833333	31.6395833333	25
118.8895833333	31.6387500000	26
118.8895833333	31.6379166667	22
118.8895833333	31.6370833333	22
118.8895833333	31.6362500000	17
118.8895833333	31.6354166667	16
118.8895833333	31.6345833333	15
118.8895833333	31.6337500000	13
118.8895833333	31.6329166667	16
118.8895833333	31.6320833333	16
118.8895833333	31.6312500000	15
118.8895833333	31.6304166667	16
118.8895833333	31.6295833333	17
118.8895833333	31.6287500000	17
118.8895833333	31.6279166667	19
118.8895833333	31.6270833333	17
118.8895833333	31.6262500000	16
118.8895833333	31.6254166667	21
118.8895833333	31.6245833333	24
118.8895833333	31.6237500000	22
118.8895833333	31.6229166667	18
118.8904166667	31.6487500000	23
118.8904166667	31.6479166667	23
118.8904166667	31.6470833333	20
118.8904166667	31.6462500000	19
118.8904166667	31.6454166667	19
118.8904166667	31.6445833333	21
118.8904166667	31.6437500000	23
118.8904166667	31.6429166667	22
118.8904166667	31.6420833333	24
118.8904166667	31.6412500000	28
118.8904166667	31.6404166667	30
118.8904166667	31.6395833333	30
118.8904166667	31.6387500000	27
118.8904166667	31.6379166667	26
118.8904166667	31.6370833333	23
118.8904166667	31.6362500000	21
118.8904166667	31.6354166667	17
118.8904166667	31.6345833333	14
118.8904166667	31.6337500000	16
118.8904166667	31.6329166667	17
118.8904166667	31.6320833333	19
118.8904166667	31.6312500000	18
118.8904166667	31.6304166667	19
118.8904166667	31.6295833333	17
118.8904166667	31.6287500000	18
118.8904166667	31.6279166667	17
118.8904166667	31.6270833333	16
118.8904166667	31.6262500000	16
118.8904166667	31.6254166667	26
118.8904166667	31.6245833333	36
118.8904166667	31.6237500000	28
118.8904166667	31.6229166667	22
118.8912500000	31.6487500000	25
118.8912500000	31.6479166667	23
118.8912500000	31.6470833333	20
118.8912500000	31.6462500000	19
118.8912500000	31.6454166667	18
118.8912500000	31.6445833333	19
118.8912500000	31.6437500000	20
118.8912500000	31.6429166667	20
118.8912500000	31.6420833333	23
118.8912500000	31.6412500000	27
118.8912500000	31.6404166667	30
118.8912500000	31.6395833333	28
118.8912500000	31.6387500000	26
118.8912500000	31.6379166667	25
118.8912500000	31.6370833333	25
118.8912500000	31.6362500000	23
118.8912500000	31.6354166667	20
118.8912500000	31.6345833333	16
118.8912500000	31.6337500000	16
118.8912500000	31.6329166667	14
118.8912500000	31.6320833333	17
118.8912500000	31.6312500000	17
118.8912500000	31.6304166667	15
118.8912500000	31.6295833333	15
118.8912500000	31.6287500000	14
118.8912500000	31.6279166667	16
118.8912500000	31.6270833333	16
118.8912500000	31.6262500000	18
118.8912500000	31.6254166667	30
118.8912500000	31.6245833333	42
118.8912500000	31.6237500000	31
118.8912500000	31.6229166667	24
118.8920833333	31.6487500000	22
118.8920833333	31.6479166667	24
118.8920833333	31.6470833333	23
118.8920833333	31.6462500000	19
118.8920833333	31.6454166667	18
118.8920833333	31.6445833333	18
118.8920833333	31.6437500000	18
118.8920833333	31.6429166667	20
118.8920833333	31.6420833333	22
118.8920833333	31.6412500000	26
118.8920833333	31.6404166667	27
118.8920833333	31.6395833333	27
118.8920833333	31.6387500000	24
118.8920833333	31.6379166667	23
118.8920833333	31.6370833333	22
118.8920833333	31.6362500000	20
118.8920833333	31.6354166667	18
118.8920833333	31.6345833333	17
118.8920833333	31.6337500000	15
118.8920833333	31.6329166667	14
118.8920833333	31.6320833333	15
118.8920833333	31.6312500000	14
118.8920833333	31.6304166667	13
118.8920833333	31.6295833333	14
118.8920833333	31.6287500000	15
118.8920833333	31.6279166667	16
118.8920833333	31.6270833333	16
118.8920833333	31.6262500000	21
118.8920833333	31.6254166667	27
118.8920833333	31.6245833333	32
118.8920833333	31.6237500000	29
118.8920833333	31.6229166667	24
118.8929166667	31.6487500000	20
118.8929166667	31.6479166667	23
118.8929166667	31.6470833333	23
118.8929166667	31.6462500000	19
118.8929166667	31.6454166667	19
118.8929166667	31.6445833333	19
118.8929166667	31.6437500000	19
118.8929166667	31.6429166667	20
118.8929166667	31.6420833333	21
118.8929166667	31.6412500000	23
118.8929166667	31.6404166667	27
118.8929166667	31.6395833333	27
118.8929166667	31.6387500000	26
118.8929166667	31.6379166667	25
118.8929166667	31.6370833333	23
118.8929166667	31.6362500000	21
118.8929166667	31.6354166667	18
118.8929166667	31.6345833333	15
118.8929166667	31.6337500000	16
118.8929166667	31.6329166667	14
118.8929166667	31.6320833333	14
118.8929166667	31.6312500000	15
118.8929166667	31.6304166667	15
118.8929166667	31.6295833333	16
118.8929166667	31.6287500000	17
118.8929166667	31.6279166667	18
118.8929166667	31.6270833333	18
118.8929166667	31.6262500000	20
118.8929166667	31.6254166667	25
118.8929166667	31.6245833333	25
118.8929166667	31.6237500000	27
118.8929166667	31.6229166667	25
118.8937500000	31.6487500000	20
118.8937500000	31.6479166667	22
118.8937500000	31.6470833333	25
118.8937500000	31.6462500000	20
118.8937500000	31.6454166667	17
118.8937500000	31.6445833333	17
118.8937500000	31.6437500000	17
118.8937500000	31.6429166667	19
118.8937500000	31.6420833333	22
118.8937500000	31.6412500000	23
118.8937500000	31.6404166667	24
118.8937500000	31.6395833333	23
118.8937500000	31.6387500000	26
118.8937500000	31.6379166667	28
118.8937500000	31.6370833333	28
118.8937500000	31.6362500000	26
118.8937500000	31.6354166667	21
118.8937500000	31.6345833333	17
118.8937500000	31.6337500000	14
118.8937500000	31.6329166667	14
118.8937500000	31.6320833333	15
118.8937500000	31.6312500000	16
118.8937500000	31.6304166667	18
118.8937500000	31.6295833333	18
118.8937500000	31.6287500000	18
118.8937500000	31.6279166667	19
118.8937500000	31.6270833333	19
118.8937500000	31.6262500000	19
118.8937500000	31.6254166667	23
118.8937500000	31.6245833333	23
118.8937500000	31.6237500000	25
118.8937500000	31.6229166667	24
118.8945833333	31.6487500000	18
118.8945833333	31.6479166667	21
118.8945833333	31.6470833333	21
118.8945833333	31.6462500000	19
118.8945833333	31.6454166667	16
118.8945833333	31.6445833333	16
118.8945833333	31.6437500000	20
118.8945833333	31.6429166667	23
118.8945833333	31.6420833333	23
118.8945833333	31.6412500000	23
118.8945833333	31.6404166667	20
118.8945833333	31.6395833333	21
118.8945833333	31.6387500000	24
118.8945833333	31.6379166667	25
118.8945833333	31.6370833333	26
118.8945833333	31.6362500000	26
118.8945833333	31.6354166667	21
118.8945833333	31.6345833333	16
118.8945833333	31.6337500000	14
118.8945833333	31.6329166667	15
118.8945833333	31.6320833333	16
118.8945833333	31.6312500000	17
118.8945833333	31.6304166667	19
118.8945833333	31.6295833333	19
118.8945833333	31.6287500000	19
118.8945833333	31.6279166667	19
118.8945833333	31.6270833333	20
118.8945833333	31.6262500000	19
118.8945833333	31.6254166667	20
118.8945833333	31.6245833333	21
118.8945833333	31.6237500000	24
118.8945833333	31.6229166667	25
118.8954166667	31.6487500000	19
118.8954166667	31.6479166667	20
118.8954166667	31.6470833333	18
118.8954166667	31.6462500000	16
118.8954166667	31.6454166667	16
118.8954166667	31.6445833333	16
118.8954166667	31.6437500000	20
118.8954166667	31.6429166667	24
118.8954166667	31.6420833333	24
118.8954166667	31.6412500000	21
118.8954166667	31.6404166667	20
118.8954166667	31.6395833333	20
118.8954166667	31.6387500000	20
118.8954166667	31.6379166667	23
118.8954166667	31.6370833333	22
118.8954166667	31.6362500000	23
118.8954166667	31.6354166667	20
118.8954166667	31.6345833333	16
118.8954166667	31.6337500000	15
118.8954166667	31.6329166667	15
118.8954166667	31.6320833333	16
118.8954166667	31.6312500000	16
118.8954166667	31.6304166667	19
118.8954166667	31.6295833333	18
118.8954166667	31.6287500000	19
118.8954166667	31.6279166667	20
118.8954166667	31.6270833333	19
118.8954166667	31.6262500000	20
118.8954166667	31.6254166667	21
118.8954166667	31.6245833333	23
118.8954166667	31.6237500000	24
118.8954166667	31.6229166667	25
118.8962500000	31.6487500000	16
118.8962500000	31.6479166667	17
118.8962500000	31.6470833333	18
118.8962500000	31.6462500000	16
118.8962500000	31.6454166667	14
118.8962500000	31.6445833333	16
118.8962500000	31.6437500000	19
118.8962500000	31.6429166667	21
118.8962500000	31.6420833333	22
118.8962500000	31.6412500000	21
118.8962500000	31.6404166667	20
118.8962500000	31.6395833333	19
118.8962500000	31.6387500000	18
118.8962500000	31.6379166667	22
118.8962500000	31.6370833333	20
118.8962500000	31.6362500000	19
118.8962500000	31.6354166667	17
118.8962500000	31.6345833333	15
118.8962500000	31.6337500000	13
118.8962500000	31.6329166667	15
118.8962500000	31.6320833333	15
118.8962500000	31.6312500000	17
118.8962500000	31.6304166667	18
118.8962500000	31.6295833333	18
118.8962500000	31.6287500000	18
118.8962500000	31.6279166667	19
118.8962500000	31.6270833333	20
118.8962500000	31.6262500000	20
118.8962500000	31.6254166667	20
118.8962500000	31.6245833333	22
118.8962500000	31.6237500000	24
118.8962500000	31.6229166667	25
118.8970833333	31.6487500000	16
118.8970833333	31.6479166667	16
118.8970833333	31.6470833333	17
118.8970833333	31.6462500000	16
118.8970833333	31.6454166667	14
118.8970833333	31.6445833333	15
118.8970833333	31.6437500000	19
118.8970833333	31.6429166667	21
118.8970833333	31.6420833333	23
118.8970833333	31.6412500000	19
118.8970833333	31.6404166667	19
118.8970833333	31.6395833333	19
118.8970833333	31.6387500000	17
118.8970833333	31.6379166667	18
118.8970833333	31.6370833333	18
118.8970833333	31.6362500000	17
118.8970833333	31.6354166667	13
118.8970833333	31.6345833333	12
118.8970833333	31.6337500000	13
118.8970833333	31.6329166667	15
118.8970833333	31.6320833333	15
118.8970833333	31.6312500000	17
118.8970833333	31.6304166667	17
118.8970833333	31.6295833333	18
118.8970833333	31.6287500000	18
118.8970833333	31.6279166667	18
118.8970833333	31.6270833333	19
118.8970833333	31.6262500000	20
118.8970833333	31.6254166667	20
118.8970833333	31.6245833333	21
118.8970833333	31.6237500000	23
118.8970833333	31.6229166667	23
118.8979166667	31.6487500000	17
118.8979166667	31.6479166667	16
118.8979166667	31.6470833333	15
118.8979166667	31.6462500000	15
118.8979166667	31.6454166667	14
118.8979166667	31.6445833333	15
118.8979166667	31.6437500000	20
118.8979166667	31.6429166667	24
118.8979166667	31.6420833333	25
118.8979166667	31.6412500000	20
118.8979166667	31.6404166667	19
118.8979166667	31.6395833333	18
118.8979166667	31.6387500000	17
118.8979166667	31.6379166667	15
118.8979166667	31.6370833333	16
118.8979166667	31.6362500000	15
118.8979166667	31.6354166667	13
118.8979166667	31.6345833333	14
118.8979166667	31.6337500000	15
118.8979166667	31.6329166667	15
118.8979166667	31.6320833333	17
118.8979166667	31.6312500000	18
118.8979166667	31.6304166667	17
118.8979166667	31.6295833333	18
118.8979166667	31.6287500000	18
118.8979166667	31.6279166667	18
118.8979166667	31.6270833333	19
118.8979166667	31.6262500000	19
118.8979166667	31.6254166667	20
118.8979166667	31.6245833333	21
118.8979166667	31.6237500000	23
118.8979166667	31.6229166667	22
118.8987500000	31.6487500000	17
118.8987500000	31.6479166667	15
118.8987500000	31.6470833333	14
118.8987500000	31.6462500000	14
118.8987500000	31.6454166667	14
118.8987500000	31.6445833333	14
118.8987500000	31.6437500000	17
118.8987500000	31.6429166667	23
118.8987500000	31.6420833333	26
118.8987500000	31.6412500000	21
118.8987500000	31.6404166667	18
118.8987500000	31.6395833333	18
118.8987500000	31.6387500000	16
118.8987500000	31.6379166667	14
118.8987500000	31.6370833333	14
118.8987500000	31.6362500000	12
118.8987500000	31.6354166667	14
118.8987500000	31.6345833333	16
118.8987500000	31.6337500000	15
118.8987500000	31.6329166667	16
118.8987500000	31.6320833333	17
118.8987500000	31.6312500000	17
118.8987500000	31.6304166667	17
118.8987500000	31.6295833333	17
118.8987500000	31.6287500000	18
118.8987500000	31.6279166667	18
118.8987500000	31.6270833333	17
118.8987500000	31.6262500000	17
118.8987500000	31.6254166667	19
118.8987500000	31.6245833333	23
118.8987500000	31.6237500000	23
118.8987500000	31.6229166667	23
118.8995833333	31.6487500000	18
118.8995833333	31.6479166667	15
118.8995833333	31.6470833333	13
118.8995833333	31.6462500000	13
118.8995833333	31.6454166667	14
118.8995833333	31.6445833333	15
118.8995833333	31.6437500000	18
118.8995833333	31.6429166667	20
118.8995833333	31.6420833333	23
118.8995833333	31.6412500000	18
118.8995833333	31.6404166667	16
118.8995833333	31.6395833333	15
118.8995833333	31.6387500000	13
118.8995833333	31.6379166667	13
118.8995833333	31.6370833333	12
118.8995833333	31.6362500000	11
118.8995833333	31.6354166667	14
118.8995833333	31.6345833333	15
118.8995833333	31.6337500000	16
118.8995833333	31.6329166667	17
118.8995833333	31.6320833333	17
118.8995833333	31.6312500000	17
118.8995833333	31.6304166667	17
118.8995833333	31.6295833333	18
118.8995833333	31.6287500000	17
118.8995833333	31.6279166667	18
118.8995833333	31.6270833333	16
118.8995833333	31.6262500000	18
118.8995833333	31.6254166667	17
118.8995833333	31.6245833333	21
118.8995833333	31.6237500000	23
118.8995833333	31.6229166667	22
118.9004166667	31.6487500000	19
118.9004166667	31.6479166667	15
118.9004166667	31.6470833333	13
118.9004166667	31.6462500000	12
118.9004166667	31.6454166667	12
118.9004166667	31.6445833333	14
118.9004166667	31.6437500000	18
118.9004166667	31.6429166667	20
118.9004166667	31.6420833333	21
118.9004166667	31.6412500000	16
118.9004166667	31.6404166667	14
118.9004166667	31.6395833333	13
118.9004166667	31.6387500000	12
118.9004166667	31.6379166667	13
118.9004166667	31.6370833333	13
118.9004166667	31.6362500000	12
118.9004166667	31.6354166667	14
118.9004166667	31.6345833333	15
118.9004166667	31.6337500000	15
118.9004166667	31.6329166667	16
118.9004166667	31.6320833333	17
118.9004166667	31.6312500000	17
118.9004166667	31.6304166667	17
118.9004166667	31.6295833333	19
118.9004166667	31.6287500000	17
118.9004166667	31.6279166667	16
118.9004166667	31.6270833333	15
118.9004166667	31.6262500000	18
118.9004166667	31.6254166667	17
118.9004166667	31.6245833333	19
118.9004166667	31.6237500000	19
118.9004166667	31.6229166667	19
118.9012500000	31.6487500000	18
118.9012500000	31.6479166667	14
118.9012500000	31.6470833333	13
118.9012500000	31.6462500000	13
118.9012500000	31.6454166667	12
118.9012500000	31.6445833333	17
118.9012500000	31.6437500000	21
118.9012500000	31.6429166667	18
118.9012500000	31.6420833333	18
118.9012500000	31.6412500000	14
118.9012500000	31.6404166667	13
118.9012500000	31.6395833333	12
118.9012500000	31.6387500000	13
118.9012500000	31.6379166667	13
118.9012500000	31.6370833333	14
118.9012500000	31.6362500000	14
118.9012500000	31.6354166667	12
118.9012500000	31.6345833333	13
118.9012500000	31.6337500000	13
118.9012500000	31.6329166667	15
118.9012500000	31.6320833333	17
118.9012500000	31.6312500000	18
118.9012500000	31.6304166667	17
118.9012500000	31.6295833333	17
118.9012500000	31.6287500000	15
118.9012500000	31.6279166667	16
118.9012500000	31.6270833333	15
118.9012500000	31.6262500000	17
118.9012500000	31.6254166667	17
118.9012500000	31.6245833333	17
118.9012500000	31.6237500000	17
118.9012500000	31.6229166667	16
