# Supplementary material for: Simulation Study on Coverage Path Planning of Autonomous Tasks in Hilly Farmland Based on Energy Consumption Model
Source: Hindawi journal article supplement (doi:10.1155/2020/4535734), 2020-08-30
Supplement: f1 [file 4535734.f1.zip › 4535734.f1/Algorithm-pathplanning-matlab/tsp/calculateDistance.m]

function [ distances ] = calculateDistance( city )
%¼ÆËã¾àÀë
    d = pdist(city);
    distances = squareform(d);
end
