# Supplementary material for: Simulation Study on Coverage Path Planning of Autonomous Tasks in Hilly Farmland Based on Energy Consumption Model
Source: Hindawi journal article supplement (doi:10.1155/2020/4535734), 2020-08-30
Supplement: f1 [file 4535734.f1.zip › 4535734.f1/Algorithm-pathplanning-matlab/tsp/crossover.m]

function [childPath] = crossover(parent1Path, parent2Path, prob)
% ½»²æ
 
    random = rand();
    if prob >= random
        [l, length] = size(parent1Path);
        childPath = zeros(l,length);
        setSize = floor(length/2) -1;
        offset = randi(setSize);
        for i=offset:setSize+offset-1
            childPath(1,i) = parent1Path(1,i);
        end
        iterator = i+1;
        j = iterator;
        while any(childPath == 0)
            if j > length
                j = 1;
            end
 
            if iterator > length
                iterator = 1;
            end
            if ~any(childPath == parent2Path(1,j))
                childPath(1,iterator) = parent2Path(1,j);
               iterator = iterator + 1;
            end
            j = j + 1;
        end
    else
        childPath = parent1Path;
    end
end
