# Supplementary material for: Simulation Study on Coverage Path Planning of Autonomous Tasks in Hilly Farmland Based on Energy Consumption Model
Source: Hindawi journal article supplement (doi:10.1155/2020/4535734), 2020-08-30
Supplement: f1 [file 4535734.f1.zip › 4535734.f1/Algorithm-pathplanning-matlab/tsp/Farm.m]

classdef Farm
    properties
        entrance;
        export;
    end
    methods
        function obj = Farm(entrance, export)
            obj.entrance = entrance;
            obj.export = export;
        end
    end
end
