# Supplementary material for: Simulation Study on Coverage Path Planning of Autonomous Tasks in Hilly Farmland Based on Energy Consumption Model
Source: Hindawi journal article supplement (doi:10.1155/2020/4535734), 2020-08-30
Supplement: f1 [file 4535734.f1.zip › 4535734.f1/Algorithm-pathplanning-matlab/tsp/farm_distance_matrix.m]

function matrix = farm_distance_matrix(farms)
%FARM_DISTANCE_MATRIX ½«Å©ÌïÁÐ±í×ª»»ÎªÅ©Ìï¾àÀë¾ØÕó
%   matrix ¾àÀë¾ØÕó
%   farms Å©ÌïÁÐ±í
farm_chooses = nchoosek(farms, 2);
distance_array = arrayfun(@(i) farm_distance(farm_chooses(i, 1), farm_chooses(i, 2)),...
    1:length(farm_chooses));
matrix = squareform(distance_array);
end

function distance = farm_distance(farm1, farm2)
%FARM_DISTANCE »ñµÃÁ½¿éÌïµÄ¾àÀë
distance = norm(farm1.export - farm2.entrance);
end
