# Supplementary material for: Simulation Study on Coverage Path Planning of Autonomous Tasks in Hilly Farmland Based on Energy Consumption Model
Source: Hindawi journal article supplement (doi:10.1155/2020/4535734), 2020-08-30
Supplement: f1 [file 4535734.f1.zip › 4535734.f1/Algorithm-pathplanning-matlab/tsp/fitness.m]

function [ fitnessvar, sumDistances,minPath, maxPath ] = fitness( distances, pop )
% ¼ÆËãÕû¸öÖÖÈºµÄÊÊÓ¦¶ÈÖµ

[popSize, col] = size(pop);
fitnessvar = zeros(popSize,1);
sumDistances = sum(distances(sub2ind([col, col], pop(:, 1:end), [pop(:, 2:end), pop(:, 1)])), 2);

minPath = min(sumDistances);
maxPath = max(sumDistances);
fitnessvar(:,1)=(maxPath - sumDistances(:,1)+0.000001) ./ (maxPath-minPath+0.00000001);
end
