# Supplementary material for: Simulation Study on Coverage Path Planning of Autonomous Tasks in Hilly Farmland Based on Energy Consumption Model
Source: Hindawi journal article supplement (doi:10.1155/2020/4535734), 2020-08-30
Supplement: f1 [file 4535734.f1.zip › 4535734.f1/Algorithm-pathplanning-matlab/tsp/gatsp.m]

function result = gatsp(cities, maxGEN, popSize, crossoverProbabilty, figure_flag)
% cities: ³ÇÊÐ n x 2 double,
% maxGEN: µü´ú´ÎÊý int
% popsize: ÒÅ´«Ëã·¨ÖÖÈº´óÐ¡ int, mod 2 must be 0
% crossoverProbabilty: %½»²æ¸ÅÂÊ double, < 1, ÀýÈç 0.9
% mutationProbabilty ±äÒì¸ÅÂÊ double, < 1, ÀýÈç 0.1
if figure_flag
    tStart = tic;
end
gbest = Inf;

% ¼ÆËãÉÏÊöÉú³ÉµÄ³ÇÊÐ¾àÀë
distances = calculateDistance(cities);

% Éú³ÉÖÖÈº£¬Ã¿¸ö¸öÌå´ú±íÒ»¸öÂ·¾¶
pop = zeros(popSize, cityNum);
for i=1:popSize
    pop(i,:) = randperm(cityNum);
end
offspring = zeros(popSize,cityNum);
%±£´æÃ¿´úµÄ×îÐ¡Â·¾¢±ãÓÚ»­Í¼
minPathes = zeros(maxGEN,1);

% GAËã·¨
for  gen=1:maxGEN
    
    % ¼ÆËãÊÊÓ¦¶ÈµÄÖµ£¬¼´Â·¾¶×Ü¾àÀë
    [fval, sumDistance, minPath, maxPath] = fitness(distances, pop);
    
    % ÂÖÅÌ¶ÄÑ¡Ôñ
    tournamentSize=4; %ÉèÖÃ´óÐ¡
    for k=1:popSize
        % Ñ¡Ôñ¸¸´ú½øÐÐ½»²æ
        tourPopDistances=zeros( tournamentSize,1);
        for i=1:tournamentSize
            randomRow = randi(popSize);
            tourPopDistances(i,1) = sumDistance(randomRow,1);
        end
        
        % Ñ¡Ôñ×îºÃµÄ£¬¼´¾àÀë×îÐ¡µÄ
        parent1  = min(tourPopDistances);
        [parent1X,parent1Y] = find(sumDistance==parent1,1, 'first');
        parent1Path = pop(parent1X(1,1),:);
        
        
        for i=1:tournamentSize
            randomRow = randi(popSize);
            tourPopDistances(i,1) = sumDistance(randomRow,1);
        end
        parent2  = min(tourPopDistances);
        [parent2X,parent2Y] = find(sumDistance==parent2,1, 'first');
        parent2Path = pop(parent2X(1,1),:);
        
        subPath = crossover(parent1Path, parent2Path, crossoverProbabilty);%½»²æ
        subPath = mutate(subPath, mutationProbabilty);%±äÒì
        
        offspring(k,:) = subPath(1,:);
        
        minPathes(gen,1) = minPath;
    end
    if figure_flag
        fprintf('´úÊý:%d   ×î¶ÌÂ·¾¶:%.2fKM \n', gen,minPath);
    end
    % ¸üÐÂ
    pop = offspring;
    % »­³öµ±Ç°×´Ì¬ÏÂµÄ×î¶ÌÂ·¾¶
    if minPath < gbest
        gbest = minPath;
        if figure_flag
            paint(cities, pop, gbest, sumDistance,gen);
        end
    end
end
if figure_flag
    figure
    plot(minPathes, 'MarkerFaceColor', 'red','LineWidth',1);
    title('ÊÕÁ²ÇúÏßÍ¼£¨Ã¿Ò»´úµÄ×î¶ÌÂ·¾¶£©');
    set(gca,'ytick',500:100:5000);
    ylabel('Â·¾¶³¤¶È');
    xlabel('µü´ú´ÎÊý');
    grid on
    tEnd = toc(tStart);
    fprintf('Ê±¼ä:%d ·Ö  %f Ãë.\n', floor(tEnd/60), rem(tEnd,60));
end

[minPathX,~] = find(totalDistances==minPath,1, 'first');
bestPopPath = pop(minPathX, :);
result.bestPath = bestPopPath;
result.minPathes = minPathes;
end
