# Supplementary material for: Simulation Study on Coverage Path Planning of Autonomous Tasks in Hilly Farmland Based on Energy Consumption Model
Source: Hindawi journal article supplement (doi:10.1155/2020/4535734), 2020-08-30
Supplement: f1 [file 4535734.f1.zip › 4535734.f1/Algorithm-pathplanning-matlab/tsp/main_tsp.m]

clear;
clc;
tStart = tic; % Ëã·¨¼ÆÊ±Æ÷
 
%%%%%%%%%%%%×Ô¶¨Òå²ÎÊý%%%%%%%%%%%%%
 
% [cityNum,cities] = ReadFile('dsj1000.tsp');
% cities = cities';
cityNum = 5;
maxGEN = 500;
popSize = 100; % ÒÅ´«Ëã·¨ÖÖÈº´óÐ¡
crossoverProbabilty = 0.9; %½»²æ¸ÅÂÊ
mutationProbabilty = 0.1; %±äÒì¸ÅÂÊ
%%%%%%%%%%%%%%%%%%%%%%%%%%%%%%%%%
 
gbest = Inf;
% Ëæ»úÉú³É³ÇÊÐÎ»ÖÃ
cities = rand(cityNum, 2) * 100;%100ÊÇ×îÔ¶¾àÀë
 
% ¼ÆËãÉÏÊöÉú³ÉµÄ³ÇÊÐ¾àÀë
distances = calculateDistance(cities);
 
% Éú³ÉÖÖÈº£¬Ã¿¸ö¸öÌå´ú±íÒ»¸öÂ·¾¶
pop = zeros(popSize, cityNum);
for i=1:popSize
    pop(i,:) = randperm(cityNum); 
end
offspring = zeros(popSize,cityNum);
%±£´æÃ¿´úµÄ×îÐ¡Â·¾¢±ãÓÚ»­Í¼
minPathes = zeros(maxGEN,1);
 
% GAËã·¨
for  gen=1:maxGEN
 
    % ¼ÆËãÊÊÓ¦¶ÈµÄÖµ£¬¼´Â·¾¶×Ü¾àÀë
    [fval, sumDistance, minPath, maxPath] = fitness(distances, pop);
 
    % ÂÖÅÌ¶ÄÑ¡Ôñ
    tournamentSize=4; %ÉèÖÃ´óÐ¡
    for k=1:popSize
        % Ñ¡Ôñ¸¸´ú½øÐÐ½»²æ
        tourPopDistances=zeros( tournamentSize,1);
        for i=1:tournamentSize
            randomRow = randi(popSize);
            tourPopDistances(i,1) = sumDistance(randomRow,1);
        end
 
        % Ñ¡Ôñ×îºÃµÄ£¬¼´¾àÀë×îÐ¡µÄ
        parent1  = min(tourPopDistances);
        [parent1X,parent1Y] = find(sumDistance==parent1,1, 'first');
        parent1Path = pop(parent1X(1,1),:);
 
 
        for i=1:tournamentSize
            randomRow = randi(popSize);
            tourPopDistances(i,1) = sumDistance(randomRow,1);
        end
        parent2  = min(tourPopDistances);
        [parent2X,parent2Y] = find(sumDistance==parent2,1, 'first');
        parent2Path = pop(parent2X(1,1),:);
 
        subPath = crossover(parent1Path, parent2Path, crossoverProbabilty);%½»²æ
        subPath = mutate(subPath, mutationProbabilty);%±äÒì
 
        offspring(k,:) = subPath(1,:);
        
        minPathes(gen,1) = minPath; 
    end
    fprintf('´úÊý:%d   ×î¶ÌÂ·¾¶:%.2fKM \n', gen,minPath);
    % ¸üÐÂ
    pop = offspring;
    % »­³öµ±Ç°×´Ì¬ÏÂµÄ×î¶ÌÂ·¾¶
    if minPath < gbest
        gbest = minPath;
        paint(cities, pop, gbest, sumDistance,gen);
    end
end
figure 
plot(minPathes, 'MarkerFaceColor', 'red','LineWidth',1);
title('ÊÕÁ²ÇúÏßÍ¼£¨Ã¿Ò»´úµÄ×î¶ÌÂ·¾¶£©');
set(gca,'ytick',500:100:5000); 
ylabel('Â·¾¶³¤¶È');
xlabel('µü´ú´ÎÊý');
grid on
tEnd = toc(tStart);
fprintf('Ê±¼ä:%d ·Ö  %f Ãë.\n', floor(tEnd/60), rem(tEnd,60));
