# Supplementary material for: Simulation Study on Coverage Path Planning of Autonomous Tasks in Hilly Farmland Based on Energy Consumption Model
Source: Hindawi journal article supplement (doi:10.1155/2020/4535734), 2020-08-30
Supplement: f1 [file 4535734.f1.zip › 4535734.f1/Algorithm-pathplanning-matlab/tsp/mutate.m]

function [ mutatedPath ] = mutate( path, prob )
%¶ÔÖ¸¶¨µÄÂ·¾¶ÀûÓÃÖ¸¶¨µÄ¸ÅÂÊ½øÐÐ¸üÐÂ
 
    random = rand();
    if random <= prob
        [l,length] = size(path);
        index1 = randi(length);
        index2 = randi(length);
        %½»»»
        temp = path(l,index1);
        path(l,index1) = path(l,index2);
        path(l,index2)=temp;
    end
        mutatedPath = path; 
end
