# Supplementary material for: Simulation Study on Coverage Path Planning of Autonomous Tasks in Hilly Farmland Based on Energy Consumption Model
Source: Hindawi journal article supplement (doi:10.1155/2020/4535734), 2020-08-30
Supplement: f1 [file 4535734.f1.zip › 4535734.f1/Algorithm-pathplanning-matlab/tsp/paint.m]

function [ output_args ] = paint( cities, pop, minPath, totalDistances,gen)
    gNumber=gen;
    [cityNum,~] = size(cities);
    xDots = cities(:, 1);
    yDots = cities(:, 2);
    %figure(1);
    title('GA TSP');
    plot(xDots,yDots, 'p', 'MarkerSize', 14, 'MarkerFaceColor', 'blue');
    xlabel('¾­¶È');
    ylabel('Î³¶È');
    axis equal
    hold on
    [minPathX,~] = find(totalDistances==minPath,1, 'first');
    bestPopPath = pop(minPathX, :);
    bestX = cities(bestPopPath, 1);
    bestY = cities(bestPopPath, 2);

    title('GA TSP');
    plot(bestX,bestY, 'red', 'LineWidth', 1.25);
    legend('Å©Ìï', 'Â·¾¶');
    axis equal
    grid on
    %text(5,0,sprintf('µü´ú´ÎÊý: %d ×ÜÂ·¾¶³¤¶È: %.2f',gNumber, minPath),'FontSize',10);
    drawnow
    hold off
end
