# Supplementary material for: Simulation Study on Coverage Path Planning of Autonomous Tasks in Hilly Farmland Based on Energy Consumption Model
Source: Hindawi journal article supplement (doi:10.1155/2020/4535734), 2020-08-30
Supplement: f1 [file 4535734.f1.zip › 4535734.f1/Algorithm-pathplanning-matlab/tsp/readFile.m]

function [n_citys,city_position] = readFile(filename)
fid = fopen(filename,'rt');
location=[];
A = [1 2];
tline = fgetl(fid);
while ischar(tline)
    if(strcmp(tline,'NODE_COORD_SECTION'))
        while ~isempty(A)
            A=fscanf(fid,'%f',[3,1]);
            if isempty(A)
                break;
            end
            location=[location;A(2:3)'];
        end
    end
    tline = fgetl(fid); 
    if strcmp(tline,'EOF')
        break;
    end
end
[m,n]=size(location);
n_citys = m;
city_position=location;
fclose(fid);
end
