# Supplementary material for: Simulation Study on Coverage Path Planning of Autonomous Tasks in Hilly Farmland Based on Energy Consumption Model
Source: Hindawi journal article supplement (doi:10.1155/2020/4535734), 2020-08-30
Supplement: f1 [file 4535734.f1.zip › 4535734.f1/Algorithm-pathplanning-matlab/tsp/tsp.m]

function min_path = tsp(distances)
%TSP TSPÎÊÌâº¯Êý»¯
%  distance ¾àÀë¾ØÕó
%  min_path ×î¶ÌÂ·¾¶µÄµãË³ÐòÅÅÁÐ 

% Éú³ÉÖÖÈº£¬Ã¿¸ö¸öÌå´ú±íÒ»¸öÂ·¾¶
maxGEN = 500;
farm_num = length(distances);
popSize = 100; % ÒÅ´«Ëã·¨ÖÖÈº´óÐ¡
crossoverProbabilty = 0.9; %½»²æ¸ÅÂÊ
mutationProbabilty = 0.1; %±äÒì¸ÅÂÊ

pop = zeros(popSize, farm_num);
for i=1:popSize
    pop(i,:) = randperm(farm_num);
end
offspring = zeros(popSize,farm_num);
%±£´æÃ¿´úµÄ×îÐ¡Â·¾¢±ãÓÚ»­Í¼
minPathes = zeros(maxGEN,1);

% GAËã·¨
for  gen=1:maxGEN
    
    % ¼ÆËãÊÊÓ¦¶ÈµÄÖµ£¬¼´Â·¾¶×Ü¾àÀë
    [fval, sumDistance, minPath, maxPath] = fitness(distances, pop);
    
    % ÂÖÅÌ¶ÄÑ¡Ôñ
    tournamentSize=4; %ÉèÖÃ´óÐ¡
    for k=1:popSize
        % Ñ¡Ôñ¸¸´ú½øÐÐ½»²æ
        tourPopDistances=zeros( tournamentSize,1);
        for i=1:tournamentSize
            randomRow = randi(popSize);
            tourPopDistances(i,1) = sumDistance(randomRow,1);
        end
        
        % Ñ¡Ôñ×îºÃµÄ£¬¼´¾àÀë×îÐ¡µÄ
        parent1  = min(tourPopDistances);
        [parent1X,parent1Y] = find(sumDistance==parent1,1, 'first');
        parent1Path = pop(parent1X(1,1),:);
        
        
        for i=1:tournamentSize
            randomRow = randi(popSize);
            tourPopDistances(i,1) = sumDistance(randomRow,1);
        end
        parent2  = min(tourPopDistances);
        [parent2X,parent2Y] = find(sumDistance==parent2,1, 'first');
        parent2Path = pop(parent2X(1,1),:);
        
        subPath = crossover(parent1Path, parent2Path, crossoverProbabilty);%½»²æ
        subPath = mutate(subPath, mutationProbabilty);%±äÒì
        
        offspring(k,:) = subPath(1,:);
        
        minPathes(gen,1) = minPath;
    end
    % ¸üÐÂ
    pop = offspring;
    % »­³öµ±Ç°×´Ì¬ÏÂµÄ×î¶ÌÂ·¾¶
    [minPathX,~] = find(sumDistance==minPath,1, 'first');
    min_path = pop(minPathX, :);
end
end
