# Supplementary material for: Simulation Study on Coverage Path Planning of Autonomous Tasks in Hilly Farmland Based on Energy Consumption Model
Source: Hindawi journal article supplement (doi:10.1155/2020/4535734), 2020-08-30
Supplement: f1 [file 4535734.f1.zip › 4535734.f1/Algorithm-pathplanning-matlab/turn/BulbTurn.m]

classdef BulbTurn < TurningStrategy
    % µÆÅÝ×ªÍä·½Ê½
    
    properties
    end
    
    methods
        function obj = BulbTurn(theta, omega, r)
            obj = obj@TurningStrategy(theta, omega, r);
        end
        function [y, to_line] = turn(obj, from_line, to_line, dir)
            
            k = tan(obj.theta);
            from  = from_line(end,:);
            to = to_line(1, :);
            
            line_from = [k, -1, from(2)-from(1)*k]; % ´ÓÆðÊ¼µãÏòÏÂÒ»ÌõÂ·¾¶Òý´¹Ïß
            foot1 = getFoot(line_from, to);
            
            line_to = [k, -1, to(2)-to(1)*k];% ´ÓÖÕÖ¹µãÏòÉÏÒ»ÌõÂ·¾¶Òý´¹Ïß
            foot2 = getFoot(line_to, from);
            
            if ~onsegment(from_line, foot1)
                from = foot1;
                from_line = [from_line;from];
            end
            if ~onsegment(to_line, foot2)
                to = foot2;
                to_line = [to;to_line];
            end
            y = Line2D(from_line);
            
            theta_line = atan(-1/k); % ÆðµãºÍÖÕµãÁ¬ÏßÓëxÖáµÄ¼Ð½Ç
            r = obj.r;
            omega = obj.omega;
            alpha = acos(0.5+omega/4/r);
            if dir
                if obj.theta < pi/2
                    arc1.radis = r;
                    arc1.point = from - (to-from)*r/omega;
                    arc1.startTheta=atan(-1/k)+pi-alpha;
                    arc1.endTheta=atan(-1/k)+pi;
                    
                    
                    arc2.radis = obj.r;
                    arc2.point = (to+from)/2 + 2*r * sin(alpha)/ sqrt(1+k*k)*[1, k];
                    arc2.startTheta=atan(-1/k)-alpha;
                    arc2.endTheta=atan(-1/k)+pi+alpha;
                    
                    arc3.radis = obj.r;
                    arc3.point = to + (to-from)*obj.r/obj.omega;
                    arc3.startTheta=atan(-1/k);
                    arc3.endTheta=atan(-1/k)+alpha;
                    
                elseif obj.theta <= pi
                    
                    arc1.radis = r;
                    arc1.point = from - (to-from)*r/omega;
                    arc1.startTheta=atan(-1/k)+pi-alpha;
                    arc1.endTheta=atan(-1/k)+pi;
                    
                    arc2.radis = obj.r;
                    arc2.point = (to+from)/2 - 2*r * sin(alpha)/ sqrt(1+k*k)*[1, k];
                    arc2.startTheta=atan(-1/k)-alpha;
                    arc2.endTheta=atan(-1/k)+pi+alpha;
                    
                    arc3.radis = obj.r;
                    arc3.point = to + (to-from)*obj.r/obj.omega;
                    arc3.startTheta=atan(-1/k);
                    arc3.endTheta=atan(-1/k)+alpha;
                elseif obj.theta <= pi*3/2
                    arc1.radis = r;
                    arc1.point = from - (to-from)*r/omega;
                    arc1.startTheta=atan(-1/k)+pi-alpha + pi;
                    arc1.endTheta=atan(-1/k) + pi + pi;
                    
                    arc2.radis = obj.r;
                    arc2.point = (to+from)/2 - 2*r * sin(alpha)/ sqrt(1+k*k)*[1, k];
                    arc2.startTheta=atan(-1/k)-alpha + pi;
                    arc2.endTheta=atan(-1/k)+pi+alpha + pi;
                    
                    arc3.radis = obj.r;
                    arc3.point = to + (to-from)*obj.r/obj.omega;
                    arc3.startTheta=atan(-1/k) + pi;
                    arc3.endTheta=atan(-1/k)+alpha + pi;
                else
                    arc1.radis = r;
                    arc1.point = from - (to-from)*r/omega;
                    arc1.startTheta=atan(-1/k)+pi-alpha + pi + alpha;
                    arc1.endTheta=atan(-1/k)+pi + pi + alpha;
                    
                    arc2.radis = obj.r;
                    arc2.point = (to+from)/2 - 2*r * sin(alpha)/ sqrt(1+k*k)*[1, k];
                    arc2.startTheta=atan(-1/k)-alpha;
                    arc2.endTheta=atan(-1/k)+pi+alpha;
                    
                    arc3.radis = obj.r;
                    arc3.point = to + (to-from)*obj.r/obj.omega;
                    arc3.startTheta=atan(-1/k) + pi - alpha;
                    arc3.endTheta=atan(-1/k)+alpha + pi - alpha;
                end
                
                
                y = {y, Arc(arc1), Arc(arc2), Arc(arc3)};
            else
                
                if obj.theta < pi/2
                    arc1.radis = r;
                    arc1.point = from - (to-from)*r/omega;
                    arc1.startTheta=atan(-1/k)+pi+alpha;
                    arc1.endTheta=atan(-1/k)+pi;
                    
                    arc2.radis = obj.r;
                    arc2.point = (to+from)/2 - 2*r * sin(alpha)/ sqrt(1+k*k)*[1, k];
                    arc2.startTheta=atan(-1/k)+pi-alpha;
                    arc2.endTheta=atan(-1/k)+2*pi+alpha;
                    
                    arc3.radis = obj.r;
                    arc3.point = to + (to-from)*obj.r/obj.omega;
                    arc3.startTheta=atan(-1/k);
                    arc3.endTheta=atan(-1/k)-alpha;
                elseif obj.theta <= pi
                    arc1.radis = r;
                    arc1.point = from - (to-from)*r/omega;
                    arc1.startTheta=atan(-1/k)+pi+alpha;
                    arc1.endTheta=atan(-1/k)+pi;
                    
                    arc2.radis = obj.r;
                    arc2.point = (to+from)/2 + 2*r * sin(alpha)/ sqrt(1+k*k)*[1, k];
                    arc2.startTheta=atan(-1/k)+pi-alpha;
                    arc2.endTheta=atan(-1/k)+2*pi+alpha;
                    
                    arc3.radis = obj.r;
                    arc3.point = to + (to-from)*obj.r/obj.omega;
                    arc3.startTheta=atan(-1/k);
                    arc3.endTheta=atan(-1/k)-alpha;
                elseif obj.theta <= pi*3/2
                    arc1.radis = r;
                    arc1.point = from - (to-from)*r/omega;
                    arc1.startTheta=atan(-1/k)+alpha;
                    
                    arc1.endTheta=atan(-1/k);
                    
                    
                    arc2.radis = obj.r;
                    arc2.point = (to+from)/2 + 2*r * sin(alpha)/ sqrt(1+k*k)*[1, k];
                    arc2.startTheta=atan(-1/k)+pi -alpha + pi;
                    arc2.endTheta=atan(-1/k)+2*pi + alpha + pi;
                    
                    
                    
                    arc3.radis = obj.r;
                    arc3.point = to + (to-from)*obj.r/obj.omega;
                    arc3.startTheta=atan(-1/k) + pi;
                    arc3.endTheta=atan(-1/k)-alpha + pi;
                else
                    arc1.radis = r;
                    arc1.point = from - (to-from)*r/omega;
                    arc1.startTheta=atan(-1/k)+pi+alpha + pi - alpha;
                    arc1.endTheta=atan(-1/k)+pi + pi - alpha;
                    
                    arc2.radis = obj.r;
                    arc2.point = (to+from)/2 + 2*r * sin(alpha)/ sqrt(1+k*k)*[1, k];
                    arc2.startTheta=atan(-1/k)+pi-alpha;
                    arc2.endTheta=atan(-1/k)+2*pi+alpha;
                    
                    arc3.radis = obj.r;
                    arc3.point = to + (to-from)*obj.r/obj.omega;
                    arc3.startTheta=atan(-1/k) + alpha + pi;
                    arc3.endTheta=atan(-1/k)-alpha + alpha + pi;
                end
                
                y = {y, Arc(arc1), Arc(arc2), Arc(arc3)};
            end
        end
    end
    
end
