# Supplementary material for: Simulation Study on Coverage Path Planning of Autonomous Tasks in Hilly Farmland Based on Energy Consumption Model
Source: Hindawi journal article supplement (doi:10.1155/2020/4535734), 2020-08-30
Supplement: f1 [file 4535734.f1.zip › 4535734.f1/Algorithm-pathplanning-matlab/turn/HookTurning.m]

classdef HookTurning  < TurningStrategy
    % ï¿½ï¿½ï¿½ï¿½×ªï¿½ä·½Ê½
    %   ï¿½Ë´ï¿½ï¿½ï¿½Ê¾ï¿½ï¿½Ï¸Ëµï¿½ï¿½
    
    properties
        % theta;
        % r;
    end
    
    methods
        function obj = HookTuring(theta, r)
%             obj = obj@TuringStrategy(theta, r);
            obj.theta = theta;  % Ð±ï¿½ï¿½
            obj.r = r;  % ï¿½Ð¼ï¿½ï¿?
        end
        function y = turn(obj, from, to, dir)
            vec = edge_line(2,:) - edge(1,:);
            theta2 = acos(vec .* [0, 1] / norm(vec)); % è¾¹ççº¿ä¸xè½´çå¤¹è§
            theta1 = theta2 - obj.theta; % å¬å¼ä¸­çtheta, è¡é©¶è·¯çº¿å?
            w2 = (obj.omega * obj.omega);
            cot_theta = cot(theta1);
            r2 = (w2 * cot_theta + w2 - 2 * obj.r * obj.omega) / (4 * obj.r - 2 * obj.omega);
            beta = asin((4*obj.r * obj.omega*cot_theta-2*w2*cot_theta)/(4*obj.r*obj.r-4*obj.omega*obj.r+w2*cot_theta*cot_theta+w2))
            alpha = beta + pi;
            % TODO:
            data1.point = [];
            data1.radis = obj.r;
            data1.startTheta = obj.theta+pi/2;
            data1.endTeta = obj.theta+pi/2+alpha;
            arc1 = Arc(data1);
            % TODO
            data2.point = [];
            data2.radis = obj.r;
            data2.startTheta = obj.theta+pi/2+alpha;
            data2.endTeta = pi;
            arc2 = Arc(data2);
            y = {arc1, arc2};
        end
    end
    
end
