# Supplementary material for: Simulation Study on Coverage Path Planning of Autonomous Tasks in Hilly Farmland Based on Energy Consumption Model
Source: Hindawi journal article supplement (doi:10.1155/2020/4535734), 2020-08-30
Supplement: f1 [file 4535734.f1.zip › 4535734.f1/Algorithm-pathplanning-matlab/turn/SimpleTurn.m]

classdef SimpleTurn < TurningStrategy
    %TurningStrategy ×ªÍä·½Ê½
    %   ´Ë´¦ÏÔÊ¾ÏêÏ¸ËµÃ÷
    
    methods
        function obj = SimpleTurn(theta, omega, r)
%             theta;  % ½Ç¶È
%             omega;  % ÐÐµÀ¿í¶È£¨¹¤×÷·ù¿í£©
%             r; % ×ªÍä°ë¾¶
            obj = obj@TurningStrategy(theta, omega, r);
        end
        function [y, to_line] = turn(obj, from, to_line, dir)
            k = tan(obj.theta);
            line_from = [k, -1, from(2)-from(1)*k];
            foot = getFoot(line_from, to);
            y = Line2D([from;foot]);
            data.radis = obj.omega/2;
            data.point = (foot + to)./2;
            
            if dir
                data.startTheta=atan(-1/k);
                data.endTheta=atan(-1/k)+pi;
            else
                data.startTheta = 0;
                data.endTheta=0;
                data.startTheta=atan(-1/k)+pi;
                data.endTheta=atan(-1/k)+2*pi;
            end
            y = {y, Arc(data)};
        end
    end
    
end
