# Supplementary material for: Simulation Study on Coverage Path Planning of Autonomous Tasks in Hilly Farmland Based on Energy Consumption Model
Source: Hindawi journal article supplement (doi:10.1155/2020/4535734), 2020-08-30
Supplement: f1 [file 4535734.f1.zip › 4535734.f1/Algorithm-pathplanning-matlab/turn/UTuring.m]

classdef SimpleTuring   %  < TuringStrategy
    %TurningStrategy ×ªÍä·½Ê½
    %   ´Ë´¦ÏÔÊ¾ÏêÏ¸ËµÃ÷
    
    properties
        theta;
        r;
    end
    
    methods
        function obj = SimpleTuring(theta, r)
%             obj = obj@TuringStrategy(theta, r);
            obj.theta = theta;  % Ð±ÂÊ
            obj.r = r;  % ÐÐ¼ä¾à
        end
        function y = turn(obj, from, to, dir)
            k = tan(obj.theta);
            line_from = [k, -1, from(2)-from(1)*k];
            foot = getFoot(line_from, to);
            y = Line2D([from;foot]);
            data.radis = obj.r/2;
            data.point = (foot + to)./2;
            if dir
                data.startTheta=atan(-1/k);
                data.endTheta=atan(-1/k)+pi;
            else
                data.startTheta = 0;
                data.endTheta=0;
                data.startTheta=atan(-1/k)+pi;
                data.endTheta=atan(-1/k)+2*pi;
            end
            y = {y, Arc(data)};
        end
    end
    
end
